# Supplementary material for: Chromatin Reprogramming via Contact Guidance-Induced Nuclear Deformation Promotes Stem Cell Differentiation
Source: Research Square preprint supplement (doi:10.21203/rs.3.rs-155599/v1), 2021-02-04
Supplement: Supplementary file 1 [file 1324d1afb753401941ae6fcc.xlsx]

## Sheet: Annotation
Input ID	Gene ID	Type	Tax ID	Homologene Gene ID	Homologene Gene Tax ID	Gene Symbol	Description	Biological Process (GO)	Kinase Class (UniProt)	Protein Function (Protein Atlas)	Subcellular Location (Protein Atlas)	Drug (DrugBank)	Canonical Pathways_x000D_	Hallmark Gene Sets_x000D_	GO:0051272 positive regulation of cellula	GO:0001655 urogenital system development	GO:0030155 regulation of cell adhesion	GO:0043408 regulation of MAPK cascade	GO:0001503 ossification	GO:0048514 blood vessel morphogenesis	GO:0006935 chemotaxis	GO:0043062 extracellular structure organi	GO:0070848 response to growth factor	GO:0009611 response to wounding	GO:0008285 negative regulation of cell pr	GO:0007169 transmembrane receptor protein	GO:0001501 skeletal system development	GO:0042326 negative regulation of phospho	M5885 NABA MATRISOME ASSOCIATED	GO:0010942 positive regulation of cell de	GO:0030855 epithelial cell differentiatio	GO:0061061 muscle structure development	GO:0061448 connective tissue development	GO:0061458 reproductive system developmen
ENSG00000054598	2296	ensembl_gene_id	H. sapiens	2296	H. sapiens	FOXC1	forkhead box C1	GO:1902257 negative regulation of apoptotic process involved in outflow tract morphogenesis;GO:1901491 negative regulation of lymphangiogenesis;GO:1902256 regulation of apoptotic process involved in outflow tract morphogenesis		Transcription factors/Helix-turn-helix domains	Nucleoplasm(Supported)Cytosol(Uncertain)			(M5906)HALLMARK ESTROGEN RESPONSE EARLY; (M5907)HALLMARK ESTROGEN RESPONSE LATE	0.0	1.0	1.0	0.0	1.0	1.0	1.0	1.0	1.0	0.0	0.0	1.0	1.0	0.0	0.0	0.0	1.0	1.0	0.0	1.0
ENSG00000181649	7262	ensembl_gene_id	H. sapiens	7262	H. sapiens	PHLDA2	pleckstrin homology like domain family A member 2	GO:0060721 regulation of spongiotrophoblast cell proliferation;GO:0060720 spongiotrophoblast cell proliferation;GO:0060723 regulation of cell proliferation involved in embryonic placenta development			Nucleoli(Uncertain)			(M5890)HALLMARK TNFA SIGNALING VIA NFKB	0.0	0.0	0.0	0.0	0.0	0.0	1.0	0.0	0.0	0.0	0.0	0.0	0.0	0.0	0.0	1.0	0.0	0.0	0.0	1.0
ENSG00000157227	4323	ensembl_gene_id	H. sapiens	4323	H. sapiens	MMP14	matrix metallopeptidase 14	GO:0045579 positive regulation of B cell differentiation;GO:0051895 negative regulation of focal adhesion assembly;GO:1905523 positive regulation of macrophage migration		Enzymes/{ENZYME proteins/Hydrolases,Peptidases/Metallopeptidases}	Cytosol;Intermediate filaments(Approved)	Marimastat (Zinc ion binding)	(M44)PID HIF2PATHWAY; (M281)PID FAK PATHWAY; (M3468)NABA ECM REGULATORS	(M5946)HALLMARK COAGULATION; (M5941)HALLMARK UV RESPONSE UP; (M5932)HALLMARK INFLAMMATORY RESPONSE	1.0	1.0	1.0	0.0	1.0	1.0	0.0	1.0	0.0	0.0	0.0	0.0	1.0	0.0	1.0	0.0	0.0	1.0	0.0	1.0
ENSG00000065802	51665	ensembl_gene_id	H. sapiens	51665	H. sapiens	ASB1	ankyrin repeat and SOCS box containing 1	GO:0042036 negative regulation of cytokine biosynthetic process;GO:0030539 male genitalia development;GO:0048806 genitalia development			Nucleoplasm(Approved)				0.0	0.0	0.0	0.0	0.0	0.0	0.0	0.0	0.0	0.0	0.0	0.0	0.0	0.0	0.0	0.0	0.0	0.0	0.0	1.0
ENSG00000087903	5990	ensembl_gene_id	H. sapiens	5990	H. sapiens	RFX2	regulatory factor X2	GO:0001675 acrosome assembly;GO:0007286 spermatid development;GO:0033363 secretory granule organization		Transcription factors/Helix-turn-helix domains	Cytosol;Golgi apparatus;Nucleoplasm(Approved)				0.0	0.0	0.0	0.0	0.0	0.0	0.0	0.0	0.0	0.0	0.0	0.0	0.0	0.0	0.0	0.0	0.0	0.0	0.0	1.0
ENSG00000052126	54477	ensembl_gene_id	H. sapiens	54477	H. sapiens	PLEKHA5	pleckstrin homology domain containing A5	GO:0061458 reproductive system development;GO:0048731 system development;GO:0007275 multicellular organism development			Cytosol(Supported)Nucleoplasm(Uncertain)				0.0	0.0	0.0	0.0	0.0	0.0	0.0	0.0	0.0	0.0	0.0	0.0	0.0	0.0	0.0	0.0	0.0	0.0	0.0	1.0
ENSG00000180530	8204	ensembl_gene_id	H. sapiens	8204	H. sapiens	NRIP1	nuclear receptor interacting protein 1	GO:0001543 ovarian follicle rupture;GO:0001542 ovulation from ovarian follicle;GO:0030521 androgen receptor signaling pathway			Nucleoli;Nucleus(Approved)	4-HYDROXY-N'-(4-ISOPROPYLBENZYL)BENZOHYDRAZIDE (Transcription corepressor activity)	(M207)PID RETINOIC ACID PATHWAY; (M285)PID HNF3A PATHWAY; (M58)PID AR PATHWAY	(M5906)HALLMARK ESTROGEN RESPONSE EARLY; (M5907)HALLMARK ESTROGEN RESPONSE LATE	0.0	0.0	0.0	0.0	0.0	0.0	0.0	0.0	0.0	0.0	0.0	0.0	0.0	0.0	0.0	0.0	0.0	0.0	0.0	1.0
ENSG00000119669	64207	ensembl_gene_id	H. sapiens	64207	H. sapiens	IRF2BPL	interferon regulatory factor 2 binding protein like	GO:0046543 development of secondary female sexual characteristics;GO:0045136 development of secondary sexual characteristics;GO:0000122 negative regulation of transcription by RNA polymerase II			Nucleoplasm(Enhanced)				0.0	0.0	0.0	0.0	0.0	0.0	0.0	0.0	0.0	0.0	0.0	0.0	0.0	0.0	0.0	0.0	0.0	0.0	0.0	1.0
ENSG00000141933	91978	ensembl_gene_id	H. sapiens	91978	H. sapiens	TPGS1	tubulin polyglutamylase complex subunit 1	GO:0007288 sperm axoneme assembly;GO:0018095 protein polyglutamylation;GO:0007286 spermatid development							0.0	0.0	0.0	0.0	0.0	0.0	0.0	0.0	0.0	0.0	0.0	0.0	0.0	0.0	0.0	0.0	0.0	0.0	0.0	1.0
ENSG00000172572	5139	ensembl_gene_id	H. sapiens	5139	H. sapiens	PDE3A	phosphodiesterase 3A	GO:0060282 positive regulation of oocyte development;GO:0060281 regulation of oocyte development;GO:0071321 cellular response to cGMP		Enzymes/ENZYME proteins/Hydrolases	Cytosol(Supported)	Milrinone (Metal ion binding);Anagrelide (Metal ion binding);Theophylline (Metal ion binding);Levosimendan (Metal ion binding);Cilostazol (Metal ion binding);Aminophylline (Metal ion binding);Oxtriphylline (Metal ion binding);Amrinone (Metal ion binding);Enoximone (Metal ion binding);Ibudilast (Metal ion binding);Tofisopam (Metal ion binding)			0.0	0.0	0.0	0.0	0.0	0.0	1.0	0.0	1.0	0.0	0.0	0.0	0.0	1.0	0.0	0.0	0.0	0.0	0.0	1.0
ENSG00000170421	3856	ensembl_gene_id	H. sapiens	3856	H. sapiens	KRT8	keratin 8	GO:0051599 response to hydrostatic pressure;GO:0070268 cornification;GO:0060706 cell differentiation involved in embryonic placenta development			Intermediate filaments(Supported)	Tenecteplase (Structural molecule activity)	(M229)PID P38 ALPHA BETA DOWNSTREAM PATHWAY	(M5908)HALLMARK ANDROGEN RESPONSE; (M5906)HALLMARK ESTROGEN RESPONSE EARLY	0.0	0.0	0.0	0.0	0.0	0.0	0.0	0.0	0.0	0.0	0.0	0.0	0.0	0.0	0.0	0.0	1.0	1.0	0.0	1.0
ENSG00000135046	301	ensembl_gene_id	H. sapiens	301	H. sapiens	ANXA1	annexin A1	GO:0045629 negative regulation of T-helper 2 cell differentiation;GO:0045627 positive regulation of T-helper 1 cell differentiation;GO:0045625 regulation of T-helper 1 cell differentiation		Transporters/Transporter channels and pores	Cytosol;Nucleoplasm;Plasma membrane(Enhanced)	Amcinonide (Structural molecule activity);Hydrocortisone (Structural molecule activity);Dexamethasone (Structural molecule activity)	(M5880)NABA ECM AFFILIATED; (M5885)NABA MATRISOME ASSOCIATED; (M5889)NABA MATRISOME	(M5946)HALLMARK COAGULATION; (M5902)HALLMARK APOPTOSIS	1.0	1.0	1.0	0.0	0.0	1.0	1.0	0.0	1.0	1.0	0.0	0.0	0.0	0.0	1.0	1.0	1.0	0.0	0.0	1.0
ENSG00000172201	3400	ensembl_gene_id	H. sapiens	3400	H. sapiens	ID4	inhibitor of DNA binding 4, HLH protein	GO:0061682 seminal vesicle morphogenesis;GO:0060741 prostate gland stromal morphogenesis;GO:0048715 negative regulation of oligodendrocyte differentiation		Transcription factors/Basic domains	Nucleus(Supported)				0.0	1.0	0.0	0.0	1.0	0.0	0.0	0.0	0.0	0.0	0.0	1.0	0.0	0.0	0.0	0.0	0.0	0.0	1.0	1.0
ENSG00000013619	10046	ensembl_gene_id	H. sapiens	10046	H. sapiens	MAMLD1	mastermind like domain containing 1	GO:0008584 male gonad development;GO:0046546 development of primary male sexual characteristics;GO:0008406 gonad development			Nucleoplasm(Supported)				0.0	0.0	0.0	0.0	0.0	0.0	0.0	0.0	0.0	0.0	0.0	0.0	0.0	0.0	0.0	0.0	0.0	0.0	0.0	1.0
ENSG00000187266	2057	ensembl_gene_id	H. sapiens	2057	H. sapiens	EPOR	erythropoietin receptor	GO:0038162 erythropoietin-mediated signaling pathway;GO:0036018 cellular response to erythropoietin;GO:0046697 decidualization			Vesicles(Supported)	Darbepoetin alfa (Identical protein binding);Erythropoietin (Identical protein binding);3,5 DIBROMOTYROSINE (Identical protein binding);Peginesatide (Identical protein binding);Epoetin Zeta (Identical protein binding)	(M233)PID EPO PATHWAY; (M231)PID KIT PATHWAY	(M5945)HALLMARK HEME METABOLISM	0.0	0.0	0.0	0.0	0.0	0.0	0.0	0.0	0.0	0.0	0.0	0.0	0.0	0.0	0.0	0.0	0.0	0.0	0.0	1.0
ENSG00000066468	2263	ensembl_gene_id	H. sapiens	2263	H. sapiens	FGFR2	fibroblast growth factor receptor 2	GO:0035602 fibroblast growth factor receptor signaling pathway involved in negative regulation of apoptotic process in bone marrow;GO:0060595 fibroblast growth factor receptor signaling pathway involved in mammary gland specification;GO:0060615 mammary gland bud formation	Tyr protein kinase family	CD markers;Enzymes/{ENZYME proteins/Transferases,Kinases/Tyr protein kinases};RAS pathway related proteins	Vesicles(Approved)	Palifermin (Protein tyrosine kinase activity);Thalidomide (Protein tyrosine kinase activity);SU4984 (Protein tyrosine kinase activity);4-[4-(1-Amino-1-Methylethyl)Phenyl]-5-Chloro-N-[4-(2-Morpholin-4-Ylethyl)Phenyl]Pyrimidin-2-Amine (Protein tyrosine kinase activity);Regorafenib (Protein tyrosine kinase activity);Ponatinib (Protein tyrosine kinase activity);Lenvatinib (Protein tyrosine kinase act…	(M276)PID FGF PATHWAY		0.0	1.0	0.0	1.0	1.0	1.0	1.0	0.0	1.0	1.0	1.0	1.0	1.0	0.0	0.0	0.0	1.0	1.0	0.0	1.0
ENSG00000112561	7942	ensembl_gene_id	H. sapiens	7942	H. sapiens	TFEB	transcription factor EB	GO:0001892 embryonic placenta development;GO:0007040 lysosome organization;GO:0080171 lytic vacuole organization		Transcription factors/Basic domains	Nucleoplasm(Supported)				0.0	0.0	0.0	0.0	0.0	0.0	0.0	0.0	0.0	0.0	0.0	0.0	0.0	0.0	0.0	0.0	0.0	0.0	0.0	1.0
ENSG00000110092	595	ensembl_gene_id	H. sapiens	595	H. sapiens	CCND1	cyclin D1	GO:0033601 positive regulation of mammary gland epithelial cell proliferation;GO:0031571 mitotic G1 DNA damage checkpoint;GO:0033327 Leydig cell differentiation			Nucleoplasm(Supported)	Arsenic trioxide (Transcription factor binding)	(M209)PID P38 GAMMA DELTA PATHWAY; (M3686)SA REG CASCADE OF CYCLIN EXPR; (M1529)SA G1 AND S PHASES	(M5903)HALLMARK NOTCH SIGNALING; (M5908)HALLMARK ANDROGEN RESPONSE; (M5902)HALLMARK APOPTOSIS	0.0	0.0	0.0	1.0	0.0	0.0	0.0	0.0	0.0	1.0	0.0	0.0	0.0	0.0	0.0	0.0	1.0	0.0	0.0	1.0
ENSG00000171316	55636	ensembl_gene_id	H. sapiens	55636	H. sapiens	CHD7	chromodomain helicase DNA binding protein 7	GO:0010880 regulation of release of sequestered calcium ion into cytosol by sarcoplasmic reticulum;GO:0003226 right ventricular compact myocardium morphogenesis;GO:0014808 release of sequestered calcium ion into cytosol by sarcoplasmic reticulum		Enzymes/ENZYME proteins/Hydrolases	Nucleoli;Nucleoplasm(Supported)		(M23)PID WNT NONCANONICAL PATHWAY		0.0	1.0	1.0	0.0	0.0	1.0	1.0	0.0	0.0	0.0	0.0	0.0	1.0	0.0	0.0	0.0	0.0	1.0	0.0	1.0
ENSG00000137868	64220	ensembl_gene_id	H. sapiens	64220	H. sapiens	STRA6	signaling receptor and transporter of retinol STRA6	GO:0071939 vitamin A import;GO:0061143 alveolar primary septum development;GO:0071938 vitamin A transport		Transporters/Electrochemical Potential-driven transporters	Cytosol;Nucleus(Approved)				0.0	1.0	0.0	0.0	0.0	1.0	1.0	0.0	0.0	0.0	0.0	0.0	0.0	0.0	0.0	0.0	0.0	1.0	0.0	1.0
ENSG00000115884	6382	ensembl_gene_id	H. sapiens	6382	H. sapiens	SDC1	syndecan 1	GO:1903553 positive regulation of extracellular exosome assembly;GO:0060009 Sertoli cell development;GO:1903551 regulation of extracellular exosome assembly		CD markers;Transporters	Focal adhesion sites(Supported)		(M212)PID INTEGRIN5 PATHWAY; (M53)PID INTEGRIN3 PATHWAY; (M198)PID SYNDECAN 1 PATHWAY	(M5937)HALLMARK GLYCOLYSIS; (M5939)HALLMARK P53 PATHWAY; (M5930)HALLMARK EPITHELIAL MESENCHYMAL TRANSITION	0.0	1.0	0.0	0.0	0.0	0.0	0.0	1.0	0.0	1.0	0.0	0.0	0.0	0.0	1.0	0.0	1.0	1.0	0.0	1.0
ENSG00000125398	6662	ensembl_gene_id	H. sapiens	6662	H. sapiens	SOX9	SRY-box transcription factor 9	GO:0090190 positive regulation of branching involved in ureteric bud morphogenesis;GO:0072289 metanephric nephron tubule formation;GO:0072034 renal vesicle induction		Transcription factors/Other all-alpha-helical DNA-binding domains	Nucleoplasm(Enhanced)			(M5937)HALLMARK GLYCOLYSIS; (M5953)HALLMARK KRAS SIGNALING UP	1.0	1.0	1.0	0.0	1.0	1.0	1.0	1.0	1.0	0.0	1.0	1.0	1.0	0.0	0.0	0.0	1.0	1.0	1.0	1.0
ENSG00000260428	642658	ensembl_gene_id	H. sapiens	642658	H. sapiens	SCX	scleraxis bHLH transcription factor	GO:0035990 tendon cell differentiation;GO:0035993 deltoid tuberosity development;GO:0035992 tendon formation		Transcription factors/Basic domains					0.0	1.0	0.0	0.0	1.0	0.0	0.0	1.0	1.0	0.0	0.0	0.0	1.0	0.0	0.0	0.0	1.0	1.0	1.0	1.0
ENSG00000057657	639	ensembl_gene_id	H. sapiens	639	H. sapiens	PRDM1	PR/SET domain 1	GO:0033082 regulation of extrathymic T cell differentiation;GO:0051136 regulation of NK T cell differentiation;GO:0033078 extrathymic T cell differentiation		Transcription factors/Zinc-coordinating DNA-binding domains	Nucleoli;Nucleus(Approved)		(M145)PID P53 DOWNSTREAM PATHWAY	(M5953)HALLMARK KRAS SIGNALING UP	0.0	1.0	1.0	0.0	0.0	1.0	0.0	0.0	0.0	0.0	0.0	0.0	0.0	0.0	0.0	0.0	1.0	0.0	0.0	1.0
ENSG00000106003	3955	ensembl_gene_id	H. sapiens	3955	H. sapiens	LFNG	LFNG O-fucosylpeptide 3-beta-N-acetylglucosaminyltransferase	GO:1902367 negative regulation of Notch signaling pathway involved in somitogenesis;GO:0002315 marginal zone B cell differentiation;GO:1902366 regulation of Notch signaling pathway involved in somitogenesis		Enzymes/ENZYME proteins/Transferases				(M5903)HALLMARK NOTCH SIGNALING; (M5956)HALLMARK KRAS SIGNALING DN	0.0	0.0	1.0	0.0	0.0	0.0	0.0	0.0	0.0	0.0	0.0	0.0	0.0	0.0	0.0	0.0	0.0	0.0	0.0	1.0
ENSG00000112981	8382	ensembl_gene_id	H. sapiens	8382	H. sapiens	NME5	NME/NM23 family member 5	GO:0006183 GTP biosynthetic process;GO:0006228 UTP biosynthetic process;GO:1902176 negative regulation of oxidative stress-induced intrinsic apoptotic signaling pathway			Nuclear bodies;Nucleoplasm(Approved)				0.0	0.0	0.0	0.0	0.0	0.0	0.0	0.0	0.0	0.0	0.0	0.0	0.0	1.0	0.0	0.0	0.0	0.0	0.0	1.0
ENSG00000135074	8728	ensembl_gene_id	H. sapiens	8728	H. sapiens	ADAM19	ADAM metallopeptidase domain 19	GO:2000049 positive regulation of cell-cell adhesion mediated by cadherin;GO:2000047 regulation of cell-cell adhesion mediated by cadherin;GO:0044331 cell-cell adhesion mediated by cadherin			Vesicles(Approved)		(M3468)NABA ECM REGULATORS; (M5885)NABA MATRISOME ASSOCIATED; (M5889)NABA MATRISOME	(M5947)HALLMARK IL2 STAT5 SIGNALING	0.0	0.0	1.0	0.0	0.0	0.0	0.0	1.0	0.0	0.0	0.0	0.0	0.0	0.0	1.0	0.0	0.0	0.0	0.0	1.0
ENSG00000205336	9289	ensembl_gene_id	H. sapiens	9289	H. sapiens	ADGRG1	adhesion G protein-coupled receptor G1	GO:0021819 layer formation in cerebral cortex;GO:0021801 cerebral cortex radial glia guided migration;GO:0021796 cerebral cortex regionalization		G-protein coupled receptors/{Family 2 (B) receptors,GPCRs excl olfactory receptors}				(M5919)HALLMARK HEDGEHOG SIGNALING	0.0	0.0	1.0	0.0	0.0	1.0	0.0	0.0	0.0	0.0	1.0	0.0	0.0	0.0	0.0	0.0	0.0	0.0	0.0	1.0
ENSG00000081059	6932	ensembl_gene_id	H. sapiens	6932	H. sapiens	TCF7	transcription factor 7	GO:0033153 T cell receptor V(D)J recombination;GO:0002681 somatic recombination of T cell receptor gene segments;GO:0002568 somatic diversification of T cell receptor genes		Transcription factors/Other all-alpha-helical DNA-binding domains	Nucleoplasm(Enhanced)		(M223)PID BETA CATENIN NUC PATHWAY; (M5493)WNT SIGNALING	(M5895)HALLMARK WNT BETA CATENIN SIGNALING	0.0	0.0	1.0	0.0	0.0	0.0	0.0	0.0	0.0	0.0	0.0	0.0	0.0	0.0	0.0	0.0	0.0	0.0	0.0	1.0
ENSG00000112715	7422	ensembl_gene_id	H. sapiens	7422	H. sapiens	VEGFA	vascular endothelial growth factor A	GO:0090190 positive regulation of branching involved in ureteric bud morphogenesis;GO:1902336 positive regulation of retinal ganglion cell axon guidance;GO:0090189 regulation of branching involved in ureteric bud morphogenesis		RAS pathway related proteins		Bevacizumab (Vascular endothelial growth factor receptor binding);Minocycline (Vascular endothelial growth factor receptor binding);Gliclazide (Vascular endothelial growth factor receptor binding);Carvedilol (Vascular endothelial growth factor receptor binding);Ranibizumab (Vascular endothelial growth factor receptor binding);Pyroglutamic Acid (Vascular endothelial growth factor receptor binding)…	(M137)PID VEGF VEGFR PATHWAY; (M103)PID S1P S1P1 PATHWAY; (M118)PID INTEGRIN A9B1 PATHWAY	(M5944)HALLMARK ANGIOGENESIS; (M5919)HALLMARK HEDGEHOG SIGNALING; (M5922)HALLMARK UNFOLDED PROTEIN RESPONSE	1.0	1.0	1.0	1.0	0.0	1.0	1.0	0.0	1.0	1.0	0.0	1.0	0.0	0.0	1.0	0.0	1.0	1.0	0.0	1.0
ENSG00000184792	23762	ensembl_gene_id	H. sapiens	23762	H. sapiens	OSBP2	oxysterol binding protein 2	GO:0007286 spermatid development;GO:0048515 spermatid differentiation;GO:0015918 sterol transport			Cytosol(Approved)			(M5945)HALLMARK HEME METABOLISM	0.0	0.0	0.0	0.0	0.0	0.0	0.0	0.0	0.0	0.0	0.0	0.0	0.0	0.0	0.0	0.0	0.0	0.0	0.0	1.0
ENSG00000104826	3972	ensembl_gene_id	H. sapiens	3972	H. sapiens	LHB	luteinizing hormone subunit beta	GO:0006701 progesterone biosynthetic process;GO:0042448 progesterone metabolic process;GO:0006700 C21-steroid hormone biosynthetic process			Cytosol(Approved)				0.0	0.0	0.0	0.0	0.0	0.0	0.0	0.0	0.0	0.0	0.0	0.0	0.0	0.0	0.0	0.0	0.0	0.0	0.0	1.0
ENSG00000154734	9510	ensembl_gene_id	H. sapiens	9510	H. sapiens	ADAMTS1	ADAM metallopeptidase with thrombospondin type 1 motif 1	GO:1904754 positive regulation of vascular associated smooth muscle cell migration;GO:0001542 ovulation from ovarian follicle;GO:1904752 regulation of vascular associated smooth muscle cell migration					(M3468)NABA ECM REGULATORS; (M5885)NABA MATRISOME ASSOCIATED; (M5889)NABA MATRISOME	(M5908)HALLMARK ANDROGEN RESPONSE	1.0	1.0	0.0	0.0	0.0	1.0	0.0	1.0	0.0	0.0	1.0	0.0	0.0	0.0	1.0	0.0	0.0	0.0	0.0	1.0
ENSG00000205213	55366	ensembl_gene_id	H. sapiens	55366	H. sapiens	LGR4	leucine rich repeat containing G protein-coupled receptor 4	GO:0090190 positive regulation of branching involved in ureteric bud morphogenesis;GO:0090189 regulation of branching involved in ureteric bud morphogenesis;GO:0072282 metanephric nephron tubule morphogenesis		G-protein coupled receptors/GPCRs excl olfactory receptors	Microtubule organizing center(Approved)				0.0	1.0	1.0	0.0	1.0	0.0	0.0	0.0	0.0	0.0	0.0	0.0	0.0	0.0	0.0	0.0	1.0	0.0	0.0	1.0
ENSG00000141448	2627	ensembl_gene_id	H. sapiens	2627	H. sapiens	GATA6	GATA binding protein 6	GO:0007493 endodermal cell fate determination;GO:0060510 type II pneumocyte differentiation;GO:0032912 negative regulation of transforming growth factor beta2 production		Transcription factors/Zinc-coordinating DNA-binding domains	Nucleus(Supported)		(M288)PID HES HEY PATHWAY		0.0	0.0	0.0	0.0	0.0	1.0	1.0	0.0	1.0	1.0	0.0	0.0	0.0	0.0	0.0	0.0	1.0	1.0	0.0	1.0
ENSG00000075213	10371	ensembl_gene_id	H. sapiens	10371	H. sapiens	SEMA3A	semaphorin 3A	GO:0021828 gonadotrophin-releasing hormone neuronal migration to the hypothalamus;GO:0021824 cerebral cortex tangential migration using cell-axon interactions;GO:1903045 neural crest cell migration involved in sympathetic nervous system development			Nucleoplasm;Vesicles(Approved)		(M5880)NABA ECM AFFILIATED; (M5885)NABA MATRISOME ASSOCIATED; (M5889)NABA MATRISOME		1.0	1.0	0.0	1.0	0.0	1.0	1.0	0.0	0.0	1.0	0.0	0.0	0.0	0.0	1.0	0.0	0.0	0.0	0.0	1.0
ENSG00000159713	51673	ensembl_gene_id	H. sapiens	51673	H. sapiens	TPPP3	tubulin polymerization promoting protein family member 3	GO:0046697 decidualization;GO:0001893 maternal placenta development;GO:0060135 maternal process involved in female pregnancy			Nucleoli fibrillar center(Approved)				0.0	0.0	0.0	0.0	0.0	0.0	0.0	0.0	0.0	0.0	0.0	0.0	0.0	0.0	0.0	0.0	0.0	0.0	0.0	1.0
ENSG00000165891	144455	ensembl_gene_id	H. sapiens	144455	H. sapiens	E2F7	E2F transcription factor 7	GO:0006977 DNA damage response, signal transduction by p53 class mediator resulting in cell cycle arrest;GO:0072431 signal transduction involved in mitotic G1 DNA damage checkpoint;GO:0032877 positive regulation of DNA endoreduplication		Transcription factors/Helix-turn-helix domains	Nuclear speckles(Supported)		(M40)PID E2F PATHWAY		0.0	0.0	0.0	0.0	0.0	1.0	0.0	0.0	0.0	0.0	1.0	0.0	0.0	0.0	0.0	0.0	1.0	0.0	0.0	1.0
ENSG00000188064	7477	ensembl_gene_id	H. sapiens	7477	H. sapiens	WNT7B	Wnt family member 7B	GO:0072236 metanephric loop of Henle development;GO:0022009 central nervous system vasculogenesis;GO:0072060 outer medullary collecting duct development					(M77)PID WNT SIGNALING PATHWAY; (M5493)WNT SIGNALING; (M5883)NABA SECRETED FACTORS		0.0	1.0	0.0	1.0	1.0	1.0	1.0	0.0	0.0	0.0	0.0	0.0	1.0	0.0	1.0	0.0	1.0	0.0	1.0	1.0
ENSG00000159167	6781	ensembl_gene_id	H. sapiens	6781	H. sapiens	STC1	stanniocalcin 1	GO:0003421 growth plate cartilage axis specification;GO:1903403 negative regulation of renal phosphate excretion;GO:1903402 regulation of renal phosphate excretion						(M5944)HALLMARK ANGIOGENESIS; (M5937)HALLMARK GLYCOLYSIS; (M5891)HALLMARK HYPOXIA	0.0	1.0	0.0	0.0	1.0	1.0	1.0	0.0	0.0	0.0	0.0	0.0	1.0	0.0	0.0	0.0	1.0	1.0	1.0	1.0
ENSG00000113494	5618	ensembl_gene_id	H. sapiens	5618	H. sapiens	PRLR	prolactin receptor	GO:0060397 JAK-STAT cascade involved in growth hormone signaling pathway;GO:0007171 activation of transmembrane receptor protein tyrosine kinase activity;GO:0038161 prolactin signaling pathway				Somatropin recombinant (Protein homodimerization activity);Fluoxymesterone (Protein homodimerization activity)	(M13)PID ERBB4 PATHWAY; (M50)PID PTP1B PATHWAY	(M5907)HALLMARK ESTROGEN RESPONSE LATE	0.0	1.0	1.0	1.0	0.0	0.0	1.0	0.0	0.0	1.0	0.0	1.0	0.0	0.0	0.0	0.0	1.0	1.0	0.0	1.0
ENSG00000073756	5743	ensembl_gene_id	H. sapiens	5743	H. sapiens	PTGS2	prostaglandin-endoperoxide synthase 2	GO:0031394 positive regulation of prostaglandin biosynthetic process;GO:0019371 cyclooxygenase pathway;GO:0031392 regulation of prostaglandin biosynthetic process		Enzymes/ENZYME proteins/Oxidoreductases	Endoplasmic reticulum(Supported)	Dihomo-gamma-linolenic acid (Prostaglandin-endoperoxide synthase activity);Icosapent (Prostaglandin-endoperoxide synthase activity);Aminosalicylic Acid (Prostaglandin-endoperoxide synthase activity);Mesalazine (Prostaglandin-endoperoxide synthase activity);Acetaminophen (Prostaglandin-endoperoxide synthase activity);Indomethacin (Prostaglandin-endoperoxide synthase activity);Nabumetone (Prostagla…	(M103)PID S1P S1P1 PATHWAY; (M235)PID TCR CALCIUM PATHWAY; (M229)PID P38 ALPHA BETA DOWNSTREAM PATHWAY	(M5953)HALLMARK KRAS SIGNALING UP; (M5913)HALLMARK INTERFERON GAMMA RESPONSE; (M5890)HALLMARK TNFA SIGNALING VIA NFKB	1.0	0.0	0.0	0.0	1.0	1.0	1.0	0.0	0.0	0.0	1.0	0.0	0.0	1.0	0.0	1.0	0.0	0.0	0.0	1.0
ENSG00000122641	3624	ensembl_gene_id	H. sapiens	3624	H. sapiens	INHBA	inhibin subunit beta A	GO:0046882 negative regulation of follicle-stimulating hormone secretion;GO:0046881 positive regulation of follicle-stimulating hormone secretion;GO:0021773 striatal medium spiny neuron differentiation					(M185)PID ALK1 PATHWAY; (M5883)NABA SECRETED FACTORS; (M5885)NABA MATRISOME ASSOCIATED	(M5932)HALLMARK INFLAMMATORY RESPONSE; (M5953)HALLMARK KRAS SIGNALING UP; (M5930)HALLMARK EPITHELIAL MESENCHYMAL TRANSITION	0.0	1.0	1.0	0.0	0.0	0.0	0.0	0.0	1.0	1.0	1.0	0.0	1.0	1.0	1.0	1.0	1.0	0.0	0.0	1.0
ENSG00000128342	3976	ensembl_gene_id	H. sapiens	3976	H. sapiens	LIF	LIF interleukin 6 family cytokine	GO:0072108 positive regulation of mesenchymal to epithelial transition involved in metanephros morphogenesis;GO:1901676 positive regulation of histone H3-K27 acetylation;GO:0003339 regulation of mesenchymal to epithelial transition involved in metanephros morphogenesis			Cytosol(Enhanced)		(M65)PID FRA PATHWAY; (M145)PID P53 DOWNSTREAM PATHWAY; (M5883)NABA SECRETED FACTORS	(M5947)HALLMARK IL2 STAT5 SIGNALING; (M5932)HALLMARK INFLAMMATORY RESPONSE; (M5953)HALLMARK KRAS SIGNALING UP	0.0	1.0	1.0	1.0	0.0	0.0	1.0	0.0	0.0	0.0	1.0	0.0	0.0	1.0	1.0	0.0	1.0	1.0	0.0	1.0
ENSG00000171345	3880	ensembl_gene_id	H. sapiens	3880	H. sapiens	KRT19	keratin 19	GO:0070268 cornification;GO:0060706 cell differentiation involved in embryonic placenta development;GO:0045214 sarcomere organization			Intermediate filaments(Supported)		(M229)PID P38 ALPHA BETA DOWNSTREAM PATHWAY	(M5908)HALLMARK ANDROGEN RESPONSE; (M5906)HALLMARK ESTROGEN RESPONSE EARLY; (M5907)HALLMARK ESTROGEN RESPONSE LATE	0.0	0.0	0.0	0.0	0.0	0.0	0.0	0.0	0.0	0.0	0.0	0.0	0.0	0.0	0.0	0.0	1.0	1.0	0.0	1.0
ENSG00000125538	3553	ensembl_gene_id	H. sapiens	3553	H. sapiens	IL1B	interleukin 1 beta	GO:0033092 positive regulation of immature T cell proliferation in thymus;GO:0060559 positive regulation of calcidiol 1-monooxygenase activity;GO:2000556 positive regulation of T-helper 1 cell cytokine production				Minocycline (Protein domain specific binding);AV411 (Protein domain specific binding);VP025 (Protein domain specific binding);681323 (Protein domain specific binding);Gallium nitrate (Protein domain specific binding);SCIO-469 (Protein domain specific binding);Etiprednol dicloacetate (Protein domain specific binding);VX-702 (Protein domain specific binding);VX-765 (Protein domain specific binding)…	(M11736)SA MMP CYTOKINE CONNECTION; (M267)PID ANTHRAX PATHWAY; (M36)PID IL27 PATHWAY	(M5897)HALLMARK IL6 JAK STAT3 SIGNALING; (M5902)HALLMARK APOPTOSIS; (M5932)HALLMARK INFLAMMATORY RESPONSE	1.0	0.0	1.0	1.0	0.0	1.0	1.0	0.0	1.0	0.0	1.0	1.0	0.0	1.0	1.0	0.0	1.0	0.0	0.0	1.0
ENSG00000179593	247	ensembl_gene_id	H. sapiens	247	H. sapiens	ALOX15B	arachidonate 15-lipoxygenase type B	GO:0090197 positive regulation of chemokine secretion;GO:0051122 hepoxilin biosynthetic process;GO:0045618 positive regulation of keratinocyte differentiation		Enzymes/ENZYME proteins/Oxidoreductases	Cytosol;Plasma membrane(Supported)			(M5939)HALLMARK P53 PATHWAY; (M5915)HALLMARK APICAL JUNCTION	0.0	1.0	0.0	0.0	0.0	0.0	0.0	0.0	0.0	0.0	1.0	0.0	0.0	0.0	0.0	0.0	1.0	0.0	0.0	1.0
ENSG00000163661	5806	ensembl_gene_id	H. sapiens	5806	H. sapiens	PTX3	pentraxin 3	GO:0044869 negative regulation by host of viral exo-alpha-sialidase activity;GO:0044866 modulation by host of viral exo-alpha-sialidase activity;GO:0052403 negative regulation by host of symbiont catalytic activity					(M2701)ST MYOCYTE AD PATHWAY; (M19043)ST ADRENERGIC	(M5930)HALLMARK EPITHELIAL MESENCHYMAL TRANSITION; (M5890)HALLMARK TNFA SIGNALING VIA NFKB	0.0	0.0	0.0	0.0	0.0	0.0	1.0	1.0	0.0	0.0	0.0	0.0	0.0	0.0	0.0	0.0	0.0	0.0	0.0	1.0
ENSG00000137869	1588	ensembl_gene_id	H. sapiens	1588	H. sapiens	CYP19A1	cytochrome P450 family 19 subfamily A member 1	GO:2000866 positive regulation of estradiol secretion;GO:0010760 negative regulation of macrophage chemotaxis;GO:2000864 regulation of estradiol secretion		Enzymes/ENZYME proteins/Oxidoreductases	Mitochondria(Approved)	Nicotine (Oxygen binding);Aminoglutethimide (Oxygen binding);Testolactone (Oxygen binding);Exemestane (Oxygen binding);Letrozole (Oxygen binding);Ketoconazole (Oxygen binding);Anastrozole (Oxygen binding);2-Methoxyestradiol (Oxygen binding);atamestane-plus-toremifene (Oxygen binding);MPI-674 (Oxygen binding)			0.0	1.0	1.0	0.0	0.0	0.0	1.0	0.0	0.0	1.0	0.0	0.0	0.0	0.0	0.0	0.0	0.0	1.0	0.0	1.0
ENSG00000196139	8644	ensembl_gene_id	H. sapiens	8644	H. sapiens	AKR1C3	aldo-keto reductase family 1 member C3	GO:1900053 negative regulation of retinoic acid biosynthetic process;GO:1900052 regulation of retinoic acid biosynthetic process;GO:0016488 farnesol catabolic process		Enzymes/ENZYME proteins/Oxidoreductases	Cytosol(Supported)Endoplasmic reticulum;Nucleoli fibrillar center;Nucleus(Approved)	NADH (Trans-1,2-dihydrobenzene-1,2-diol dehydrogenase activity);Bimatoprost (Trans-1,2-dihydrobenzene-1,2-diol dehydrogenase activity);4-Androstenedione (Trans-1,2-dihydrobenzene-1,2-diol dehydrogenase activity);Rutin (Trans-1,2-dihydrobenzene-1,2-diol dehydrogenase activity);(5e,13e)-9,15-Dihydroxy-11-Oxoprosta-5,13-Dien-1-Oicacid (Trans-1,2-dihydrobenzene-1,2-diol dehydrogenase activity);Flufen…		(M5934)HALLMARK XENOBIOTIC METABOLISM	0.0	0.0	0.0	0.0	0.0	0.0	0.0	0.0	0.0	0.0	0.0	0.0	0.0	0.0	0.0	1.0	1.0	0.0	0.0	1.0
ENSG00000109906	7704	ensembl_gene_id	H. sapiens	7704	H. sapiens	ZBTB16	zinc finger and BTB domain containing 16	GO:0051138 positive regulation of NK T cell differentiation;GO:0051136 regulation of NK T cell differentiation;GO:0048133 male germ-line stem cell asymmetric division		Transcription factors/Zinc-coordinating DNA-binding domains				(M5956)HALLMARK KRAS SIGNALING DN; (M5939)HALLMARK P53 PATHWAY	0.0	1.0	1.0	0.0	1.0	0.0	0.0	0.0	0.0	0.0	1.0	0.0	1.0	0.0	0.0	1.0	0.0	0.0	1.0	1.0
ENSG00000196549	4311	ensembl_gene_id	H. sapiens	4311	H. sapiens	MME	membrane metalloendopeptidase	GO:0002003 angiotensin maturation;GO:0002002 regulation of angiotensin levels in blood;GO:0001991 regulation of systemic arterial blood pressure by circulatory renin-angiotensin		CD markers;Enzymes/{ENZYME proteins/Hydrolases,Peptidases/Metallopeptidases}		Candoxatril (Zinc ion binding);Omapatrilat (Zinc ion binding);N-[3-[(1-Aminoethyl)(Hydroxy)Phosphoryl]-2-(1,1'-Biphenyl-4-Ylmethyl)Propanoyl]Alanine (Zinc ion binding);Phosphoramidon (Zinc ion binding);N-(3-Phenyl-2-Sulfanylpropanoyl)Phenylalanylalanine (Zinc ion binding);[2(R,S)-2-Sulfanylheptanoyl]-Phe-Ala (Zinc ion binding);SLV 306 (Zinc ion binding);2-[(1S)-1-BENZYL-2-SULFANYLETHYL]-1H-IMIDAZ…			0.0	1.0	0.0	0.0	0.0	0.0	1.0	0.0	0.0	0.0	0.0	0.0	0.0	0.0	0.0	0.0	0.0	0.0	0.0	1.0
ENSG00000011465	1634	ensembl_gene_id	H. sapiens	1634	H. sapiens	DCN	decorin	GO:0030208 dermatan sulfate biosynthetic process;GO:1900747 negative regulation of vascular endothelial growth factor signaling pathway;GO:0030207 chondroitin sulfate catabolic process				Tris (Poly(a) rna binding)	(M5882)NABA PROTEOGLYCANS; (M65)PID FRA PATHWAY; (M5884)NABA CORE MATRISOME	(M5902)HALLMARK APOPTOSIS; (M5937)HALLMARK GLYCOLYSIS; (M5891)HALLMARK HYPOXIA	0.0	1.0	0.0	0.0	0.0	1.0	0.0	1.0	1.0	1.0	0.0	1.0	0.0	0.0	0.0	0.0	0.0	1.0	0.0	1.0
ENSG00000134853	5156	ensembl_gene_id	H. sapiens	5156	H. sapiens	PDGFRA	platelet derived growth factor receptor alpha	GO:0072277 metanephric glomerular capillary formation;GO:0072276 metanephric glomerulus vasculature morphogenesis;GO:0072104 glomerular capillary formation	Tyr protein kinase family	CD markers;Enzymes/{ENZYME proteins/Transferases,Kinases/Tyr protein kinases};RAS pathway related proteins	Cell Junctions;Plasma membrane(Supported)Nucleus(Approved)	Becaplermin (Vascular endothelial growth factor-activated receptor activity);Imatinib (Vascular endothelial growth factor-activated receptor activity);Sunitinib (Vascular endothelial growth factor-activated receptor activity);XL820 (Vascular endothelial growth factor-activated receptor activity);MP470 (Vascular endothelial growth factor-activated receptor activity);Olaratumab (Vascular endothelia…	(M206)PID PDGFRA PATHWAY; (M166)PID ATF2 PATHWAY		1.0	1.0	1.0	1.0	0.0	1.0	1.0	1.0	1.0	1.0	0.0	1.0	1.0	0.0	0.0	0.0	0.0	1.0	0.0	1.0
ENSG00000225697	65010	ensembl_gene_id	H. sapiens	65010	H. sapiens	SLC26A6	solute carrier family 26 member 6	GO:2001150 positive regulation of dipeptide transmembrane transport;GO:2000880 positive regulation of dipeptide transport;GO:2001148 regulation of dipeptide transmembrane transport		Transporters/Electrochemical Potential-driven transporters	Cytosol(Uncertain)				0.0	0.0	0.0	0.0	0.0	0.0	0.0	0.0	0.0	0.0	0.0	0.0	0.0	0.0	0.0	0.0	0.0	0.0	0.0	1.0
ENSG00000183691	9241	ensembl_gene_id	H. sapiens	9241	H. sapiens	NOG	noggin	GO:0090190 positive regulation of branching involved in ureteric bud morphogenesis;GO:0060676 ureteric bud formation;GO:0090189 regulation of branching involved in ureteric bud morphogenesis					(M181)PID BMP PATHWAY	(M5896)HALLMARK TGF BETA SIGNALING	0.0	1.0	0.0	0.0	1.0	1.0	1.0	0.0	1.0	1.0	1.0	1.0	1.0	1.0	0.0	0.0	0.0	1.0	1.0	1.0
ENSG00000092445	7301	ensembl_gene_id	H. sapiens	7301	H. sapiens	TYRO3	TYRO3 protein tyrosine kinase	GO:0034122 negative regulation of toll-like receptor signaling pathway;GO:0034121 regulation of toll-like receptor signaling pathway;GO:0060068 vagina development	Tyr protein kinase family	Enzymes/{ENZYME proteins/Transferases,Kinases/Tyr protein kinases}				(M5941)HALLMARK UV RESPONSE UP	0.0	0.0	1.0	1.0	0.0	0.0	1.0	0.0	0.0	1.0	0.0	1.0	0.0	0.0	0.0	0.0	0.0	0.0	0.0	1.0
ENSG00000041982	3371	ensembl_gene_id	H. sapiens	3371	H. sapiens	TNC	tenascin C	GO:0060739 mesenchymal-epithelial cell signaling involved in prostate gland development;GO:0060447 bud outgrowth involved in lung branching;GO:0071799 cellular response to prostaglandin D stimulus					(M118)PID INTEGRIN A9B1 PATHWAY; (M165)PID SYNDECAN 4 PATHWAY; (M53)PID INTEGRIN3 PATHWAY	(M5930)HALLMARK EPITHELIAL MESENCHYMAL TRANSITION; (M5890)HALLMARK TNFA SIGNALING VIA NFKB	0.0	1.0	1.0	0.0	1.0	0.0	1.0	1.0	1.0	1.0	0.0	0.0	0.0	0.0	0.0	0.0	0.0	0.0	0.0	1.0
ENSG00000116133	1718	ensembl_gene_id	H. sapiens	1718	H. sapiens	DHCR24	24-dehydrocholesterol reductase	GO:0033489 cholesterol biosynthetic process via desmosterol;GO:0033490 cholesterol biosynthetic process via lathosterol;GO:0043154 negative regulation of cysteine-type endopeptidase activity involved in apoptotic process		Enzymes/ENZYME proteins/Oxidoreductases				(M5908)HALLMARK ANDROGEN RESPONSE; (M5949)HALLMARK PEROXISOME; (M5948)HALLMARK BILE ACID METABOLISM	0.0	0.0	0.0	0.0	0.0	0.0	0.0	0.0	0.0	0.0	1.0	0.0	0.0	0.0	0.0	0.0	1.0	0.0	0.0	1.0
ENSG00000168229	5729	ensembl_gene_id	H. sapiens	5729	H. sapiens	PTGDR	prostaglandin D2 receptor	GO:0071799 cellular response to prostaglandin D stimulus;GO:0071798 response to prostaglandin D;GO:0046085 adenosine metabolic process		G-protein coupled receptors/GPCRs excl olfactory receptors		Nedocromil (Prostaglandin j receptor activity)	(M99)PID TXA2PATHWAY		0.0	0.0	0.0	0.0	0.0	0.0	0.0	0.0	0.0	0.0	0.0	0.0	0.0	0.0	0.0	0.0	0.0	0.0	0.0	1.0
ENSG00000083223	79670	ensembl_gene_id	H. sapiens	79670	H. sapiens	TUT7	terminal uridylyl transferase 7	GO:1990074 polyuridylation-dependent mRNA catabolic process;GO:0031054 pre-miRNA processing;GO:0010526 negative regulation of transposition, RNA-mediated		Enzymes/ENZYME proteins/Transferases	Cytosol(Supported)Nucleoplasm(Approved)				0.0	0.0	0.0	0.0	0.0	0.0	0.0	0.0	0.0	0.0	0.0	0.0	0.0	0.0	0.0	0.0	0.0	0.0	0.0	1.0
ENSG00000118689	2309	ensembl_gene_id	H. sapiens	2309	H. sapiens	FOXO3	forkhead box O3	GO:1901300 positive regulation of hydrogen peroxide-mediated programmed cell death;GO:0001544 initiation of primordial ovarian follicle growth;GO:0071386 cellular response to corticosterone stimulus		Transcription factors/Helix-turn-helix domains	Nucleus(Enhanced)		(M32)PID HDAC CLASSIII PATHWAY; (M143)PID IL2 PI3K PATHWAY; (M249)PID PI3KCI AKT PATHWAY	(M5939)HALLMARK P53 PATHWAY; (M5891)HALLMARK HYPOXIA; (M5945)HALLMARK HEME METABOLISM	0.0	0.0	1.0	0.0	0.0	0.0	1.0	0.0	1.0	0.0	0.0	1.0	0.0	0.0	0.0	1.0	0.0	0.0	0.0	1.0
ENSG00000174804	8322	ensembl_gene_id	H. sapiens	8322	H. sapiens	FZD4	frizzled class receptor 4	GO:0061301 cerebellum vasculature morphogenesis;GO:0061304 retinal blood vessel morphogenesis;GO:0150012 positive regulation of neuron projection arborization		CD markers;G-protein coupled receptors/{Family fz/smo receptors,GPCRs excl olfactory receptors}	Cytosol;Nucleoplasm;Plasma membrane(Approved)		(M77)PID WNT SIGNALING PATHWAY; (M5493)WNT SIGNALING	(M5905)HALLMARK ADIPOGENESIS	0.0	1.0	1.0	1.0	0.0	1.0	1.0	0.0	1.0	0.0	0.0	1.0	0.0	0.0	0.0	0.0	0.0	0.0	0.0	1.0
ENSG00000183160	338773	ensembl_gene_id	H. sapiens	338773	H. sapiens	TMEM119	transmembrane protein 119	GO:0045779 negative regulation of bone resorption;GO:0010832 negative regulation of myotube differentiation;GO:1903012 positive regulation of bone development							0.0	0.0	0.0	0.0	1.0	0.0	0.0	0.0	0.0	0.0	0.0	0.0	1.0	0.0	0.0	0.0	0.0	1.0	0.0	1.0
ENSG00000137819	54852	ensembl_gene_id	H. sapiens	54852	H. sapiens	PAQR5	progestin and adipoQ receptor family member 5	GO:0048477 oogenesis;GO:0007292 female gamete generation;GO:0007281 germ cell development			Vesicles(Approved)				0.0	0.0	0.0	0.0	0.0	0.0	0.0	0.0	0.0	0.0	0.0	0.0	0.0	0.0	0.0	0.0	0.0	0.0	0.0	1.0
ENSG00000164342	7098	ensembl_gene_id	H. sapiens	7098	H. sapiens	TLR3	toll like receptor 3	GO:0034128 negative regulation of MyD88-independent toll-like receptor signaling pathway;GO:0034127 regulation of MyD88-independent toll-like receptor signaling pathway;GO:0035666 TRIF-dependent toll-like receptor signaling pathway		CD markers			(M264)PID TOLL ENDOGENOUS PATHWAY	(M5932)HALLMARK INFLAMMATORY RESPONSE; (M5950)HALLMARK ALLOGRAFT REJECTION	0.0	0.0	1.0	1.0	0.0	1.0	0.0	0.0	0.0	0.0	0.0	0.0	0.0	0.0	0.0	1.0	0.0	0.0	0.0	1.0
ENSG00000120899	2185	ensembl_gene_id	H. sapiens	2185	H. sapiens	PTK2B	protein tyrosine kinase 2 beta	GO:2000538 positive regulation of B cell chemotaxis;GO:2000537 regulation of B cell chemotaxis;GO:0002315 marginal zone B cell differentiation	Tyr protein kinase family	Enzymes/{ENZYME proteins/Transferases,Kinases/Tyr protein kinases}	Cytosol;Plasma membrane(Enhanced)	Leflunomide (Signal transducer activity);Genistein (Signal transducer activity);4-{[4-{[(1R,2R)-2-(dimethylamino)cyclopentyl]amino}-5-(trifluoromethyl)pyrimidin-2-yl]amino}-N-methylbenzenesulfonamide (Signal transducer activity)	(M12771)SA PTEN PATHWAY; (M63)PID AVB3 OPN PATHWAY; (M275)PID ALPHA SYNUCLEIN PATHWAY	(M5908)HALLMARK ANDROGEN RESPONSE	1.0	0.0	1.0	1.0	1.0	1.0	1.0	0.0	0.0	0.0	1.0	1.0	0.0	0.0	0.0	0.0	0.0	0.0	0.0	1.0
ENSG00000113721	5159	ensembl_gene_id	H. sapiens	5159	H. sapiens	PDGFRB	platelet derived growth factor receptor beta	GO:0035793 positive regulation of metanephric mesenchymal cell migration by platelet-derived growth factor receptor-beta signaling pathway;GO:0072277 metanephric glomerular capillary formation;GO:0072262 metanephric glomerular mesangial cell proliferation involved in metanephros development	Tyr protein kinase family	CD markers;Enzymes/{ENZYME proteins/Transferases,Kinases/Tyr protein kinases};RAS pathway related proteins	Vesicles(Supported)Golgi apparatus(Approved)	Becaplermin (Vascular endothelial growth factor binding);Sorafenib (Vascular endothelial growth factor binding);Imatinib (Vascular endothelial growth factor binding);Dasatinib (Vascular endothelial growth factor binding);Sunitinib (Vascular endothelial growth factor binding);XL999 (Vascular endothelial growth factor binding);XL820 (Vascular endothelial growth factor binding);Pazopanib (Vascular e…	(M103)PID S1P S1P1 PATHWAY; (M55)PID S1P S1P3 PATHWAY; (M72)PID NECTIN PATHWAY	(M5942)HALLMARK UV RESPONSE DN; (M5902)HALLMARK APOPTOSIS; (M5930)HALLMARK EPITHELIAL MESENCHYMAL TRANSITION	1.0	1.0	1.0	1.0	0.0	1.0	1.0	0.0	1.0	1.0	0.0	1.0	1.0	0.0	0.0	1.0	0.0	1.0	1.0	1.0
ENSG00000126803	3306	ensembl_gene_id	H. sapiens	3306	H. sapiens	HSPA2	heat shock protein family A (Hsp70) member 2	GO:1901896 positive regulation of calcium-transporting ATPase activity;GO:1901894 regulation of calcium-transporting ATPase activity;GO:1901021 positive regulation of calcium ion transmembrane transporter activity			Nucleoplasm;Vesicles(Approved)			(M5951)HALLMARK SPERMATOGENESIS; (M5941)HALLMARK UV RESPONSE UP	0.0	0.0	0.0	0.0	0.0	0.0	0.0	0.0	0.0	0.0	0.0	0.0	0.0	0.0	0.0	0.0	0.0	0.0	0.0	1.0
ENSG00000163659	25976	ensembl_gene_id	H. sapiens	25976	H. sapiens	TIPARP	TCDD inducible poly(ADP-ribose) polymerase	GO:1904612 response to 2,3,7,8-tetrachlorodibenzodioxine;GO:0070213 protein auto-ADP-ribosylation;GO:0008209 androgen metabolic process		Enzymes/ENZYME proteins/Transferases	Microtubules(Approved)			(M5906)HALLMARK ESTROGEN RESPONSE EARLY; (M5891)HALLMARK HYPOXIA; (M5890)HALLMARK TNFA SIGNALING VIA NFKB	0.0	1.0	0.0	0.0	0.0	1.0	0.0	0.0	0.0	0.0	0.0	1.0	1.0	0.0	0.0	0.0	0.0	1.0	0.0	1.0
ENSG00000184371	1435	ensembl_gene_id	H. sapiens	1435	H. sapiens	CSF1	colony stimulating factor 1	GO:1902228 positive regulation of macrophage colony-stimulating factor signaling pathway;GO:1904141 positive regulation of microglial cell migration;GO:1903974 positive regulation of cellular response to macrophage colony-stimulating factor stimulus		RAS pathway related proteins			(M11736)SA MMP CYTOKINE CONNECTION; (M91)PID TCPTP PATHWAY; (M50)PID PTP1B PATHWAY	(M5897)HALLMARK IL6 JAK STAT3 SIGNALING; (M5911)HALLMARK INTERFERON ALPHA RESPONSE; (M5947)HALLMARK IL2 STAT5 SIGNALING	1.0	1.0	1.0	1.0	1.0	0.0	1.0	0.0	0.0	0.0	0.0	1.0	0.0	0.0	1.0	0.0	0.0	0.0	1.0	1.0
ENSG00000181690	5324	ensembl_gene_id	H. sapiens	5324	H. sapiens	PLAG1	PLAG1 zinc finger	GO:0060252 positive regulation of glial cell proliferation;GO:0060736 prostate gland growth;GO:0060251 regulation of glial cell proliferation		Transcription factors/Zinc-coordinating DNA-binding domains	Nuclear speckles(Supported)			(M5956)HALLMARK KRAS SIGNALING DN	0.0	1.0	0.0	0.0	0.0	0.0	1.0	0.0	0.0	0.0	0.0	0.0	0.0	0.0	0.0	0.0	0.0	1.0	0.0	1.0
ENSG00000142871	3491	ensembl_gene_id	H. sapiens	3491	H. sapiens	CCN1	cellular communication network factor 1	GO:0002041 intussusceptive angiogenesis;GO:2000304 positive regulation of ceramide biosynthetic process;GO:0060710 chorio-allantoic fusion					(M212)PID INTEGRIN5 PATHWAY; (M169)PID INTEGRIN2 PATHWAY; (M53)PID INTEGRIN3 PATHWAY	(M5942)HALLMARK UV RESPONSE DN; (M5891)HALLMARK HYPOXIA; (M5890)HALLMARK TNFA SIGNALING VIA NFKB	1.0	1.0	1.0	1.0	1.0	1.0	1.0	1.0	1.0	1.0	0.0	0.0	1.0	0.0	0.0	1.0	0.0	0.0	1.0	1.0
ENSG00000172216	1051	ensembl_gene_id	H. sapiens	1051	H. sapiens	CEBPB	CCAAT enhancer binding protein beta	GO:2000120 positive regulation of sodium-dependent phosphate transport;GO:1901329 regulation of odontoblast differentiation;GO:2000118 regulation of sodium-dependent phosphate transport		Transcription factors/Basic domains	Nucleoplasm(Enhanced)		(M182)PID IL3 PATHWAY; (M229)PID P38 ALPHA BETA DOWNSTREAM PATHWAY; (M161)PID IFNG PATHWAY	(M5922)HALLMARK UNFOLDED PROTEIN RESPONSE; (M5921)HALLMARK COMPLEMENT; (M5890)HALLMARK TNFA SIGNALING VIA NFKB	0.0	0.0	1.0	0.0	1.0	0.0	0.0	0.0	0.0	0.0	1.0	0.0	0.0	0.0	0.0	0.0	1.0	0.0	0.0	1.0
ENSG00000070404	10272	ensembl_gene_id	H. sapiens	10272	H. sapiens	FSTL3	follistatin like 3	GO:0045671 negative regulation of osteoclast differentiation;GO:0032926 negative regulation of activin receptor signaling pathway;GO:0002762 negative regulation of myeloid leukocyte differentiation			Nucleoplasm(Approved)		(M5883)NABA SECRETED FACTORS; (M5885)NABA MATRISOME ASSOCIATED; (M5889)NABA MATRISOME	(M5930)HALLMARK EPITHELIAL MESENCHYMAL TRANSITION	0.0	1.0	1.0	0.0	1.0	0.0	0.0	0.0	1.0	0.0	0.0	0.0	0.0	0.0	1.0	0.0	0.0	0.0	0.0	1.0
ENSG00000137573	23213	ensembl_gene_id	H. sapiens	23213	H. sapiens	SULF1	sulfatase 1	GO:0060686 negative regulation of prostatic bud formation;GO:0060685 regulation of prostatic bud formation;GO:0014846 esophagus smooth muscle contraction					(M3468)NABA ECM REGULATORS; (M5885)NABA MATRISOME ASSOCIATED; (M5889)NABA MATRISOME		0.0	1.0	0.0	0.0	0.0	1.0	0.0	1.0	1.0	0.0	1.0	1.0	1.0	0.0	1.0	0.0	0.0	0.0	1.0	1.0
ENSG00000170915	85315	ensembl_gene_id	H. sapiens	85315	H. sapiens	PAQR8	progestin and adipoQ receptor family member 8	GO:0043401 steroid hormone mediated signaling pathway;GO:0048477 oogenesis;GO:0071383 cellular response to steroid hormone stimulus			Golgi apparatus;Plasma membrane(Supported)				0.0	0.0	0.0	0.0	0.0	0.0	0.0	0.0	0.0	0.0	0.0	0.0	0.0	0.0	0.0	0.0	0.0	0.0	0.0	1.0
ENSG00000100644	3091	ensembl_gene_id	H. sapiens	3091	H. sapiens	HIF1A	hypoxia inducible factor 1 subunit alpha	GO:0021502 neural fold elevation formation;GO:0070101 positive regulation of chemokine-mediated signaling pathway;GO:1903377 negative regulation of oxidative stress-induced neuron intrinsic apoptotic signaling pathway		Transcription factors/Basic domains	Nuclear bodies;Nucleoplasm(Supported)Plasma membrane(Approved)	Carvedilol (Ubiquitin protein ligase binding);2-Methoxyestradiol (Ubiquitin protein ligase binding);N-[(1-CHLORO-4-HYDROXYISOQUINOLIN-3-YL)CARBONYL]GLYCINE (Ubiquitin protein ligase binding)	(M180)PID HIF1A PATHWAY; (M226)PID VEGFR1 PATHWAY; (M288)PID HES HEY PATHWAY	(M5932)HALLMARK INFLAMMATORY RESPONSE; (M5913)HALLMARK INTERFERON GAMMA RESPONSE; (M5901)HALLMARK G2M CHECKPOINT	1.0	1.0	1.0	0.0	1.0	1.0	1.0	0.0	1.0	1.0	0.0	1.0	1.0	1.0	0.0	0.0	1.0	0.0	1.0	1.0
ENSG00000068878	23198	ensembl_gene_id	H. sapiens	23198	H. sapiens	PSME4	proteasome activator subunit 4	GO:0035093 spermatogenesis, exchange of chromosomal proteins;GO:0035092 sperm chromatin condensation;GO:0002223 stimulatory C-type lectin receptor signaling pathway			Nucleoplasm(Supported)				0.0	1.0	1.0	0.0	0.0	0.0	0.0	0.0	0.0	0.0	0.0	0.0	0.0	0.0	0.0	0.0	0.0	0.0	0.0	1.0
ENSG00000185567	113146	ensembl_gene_id	H. sapiens	113146	H. sapiens	AHNAK2	AHNAK nucleoprotein 2	GO:0001778 plasma membrane repair;GO:0007009 plasma membrane organization;GO:0043484 regulation of RNA splicing			Cytosol;Plasma membrane(Enhanced)				0.0	0.0	0.0	0.0	0.0	0.0	0.0	0.0	0.0	1.0	0.0	0.0	0.0	0.0	0.0	0.0	0.0	0.0	0.0	0.0
ENSG00000125347	3659	ensembl_gene_id	H. sapiens	3659	H. sapiens	IRF1	interferon regulatory factor 1	GO:0034124 regulation of MyD88-dependent toll-like receptor signaling pathway;GO:0045590 negative regulation of regulatory T cell differentiation;GO:2000564 regulation of CD8-positive, alpha-beta T cell proliferation		Transcription factors/Helix-turn-helix domains	Cytosol;Nucleoplasm(Supported)		(M290)PID IL12 STAT4 PATHWAY; (M161)PID IFNG PATHWAY; (M183)PID IL6 7 PATHWAY	(M5897)HALLMARK IL6 JAK STAT3 SIGNALING; (M5911)HALLMARK INTERFERON ALPHA RESPONSE; (M5941)HALLMARK UV RESPONSE UP	0.0	0.0	1.0	0.0	0.0	0.0	0.0	0.0	0.0	1.0	1.0	0.0	0.0	0.0	0.0	0.0	0.0	0.0	0.0	0.0
ENSG00000197077	85379	ensembl_gene_id	H. sapiens	85379	H. sapiens	KIAA1671	KIAA1671				Microtubules(Approved)				0.0	0.0	0.0	0.0	0.0	0.0	0.0	0.0	0.0	0.0	0.0	0.0	0.0	0.0	0.0	0.0	0.0	0.0	0.0	0.0
ENSG00000144843	141	ensembl_gene_id	H. sapiens	141	H. sapiens	ADPRH	ADP-ribosylarginine hydrolase	GO:0051725 protein de-ADP-ribosylation;GO:0090630 activation of GTPase activity;GO:0043547 positive regulation of GTPase activity		Enzymes/ENZYME proteins/Hydrolases	Nuclear membrane;Nucleus(Approved)				0.0	0.0	0.0	0.0	0.0	0.0	0.0	0.0	0.0	0.0	0.0	0.0	0.0	0.0	0.0	0.0	0.0	0.0	0.0	0.0
ENSG00000147799	80728	ensembl_gene_id	H. sapiens	80728	H. sapiens	ARHGAP39	Rho GTPase activating protein 39	GO:0099173 postsynapse organization;GO:0043547 positive regulation of GTPase activity;GO:0051056 regulation of small GTPase mediated signal transduction			Cytokinetic bridge;Cytosol;Microtubules;Nucleoplasm(Approved)				0.0	0.0	0.0	0.0	0.0	0.0	0.0	0.0	0.0	0.0	0.0	0.0	0.0	0.0	0.0	0.0	0.0	0.0	0.0	0.0
ENSG00000158158	26504	ensembl_gene_id	H. sapiens	26504	H. sapiens	CNNM4	cyclin and CBS domain divalent metal cation transport mediator 4	GO:0070166 enamel mineralization;GO:1903830 magnesium ion transmembrane transport;GO:0010960 magnesium ion homeostasis		Transporters	Plasma membrane(Supported)Actin filaments(Uncertain)				0.0	0.0	0.0	0.0	1.0	0.0	0.0	0.0	0.0	0.0	0.0	0.0	0.0	0.0	0.0	0.0	0.0	0.0	0.0	0.0
ENSG00000077157	4660	ensembl_gene_id	H. sapiens	4660	H. sapiens	PPP1R12B	protein phosphatase 1 regulatory subunit 12B	GO:0006937 regulation of muscle contraction;GO:0000086 G2/M transition of mitotic cell cycle;GO:0044839 cell cycle G2/M phase transition			Actin filaments;Plasma membrane(Supported)				0.0	0.0	0.0	0.0	0.0	0.0	0.0	0.0	0.0	0.0	0.0	0.0	0.0	0.0	0.0	0.0	0.0	0.0	0.0	0.0
ENSG00000169951	92595	ensembl_gene_id	H. sapiens	92595	H. sapiens	ZNF764	zinc finger protein 764	GO:0006355 regulation of transcription, DNA-templated;GO:1903506 regulation of nucleic acid-templated transcription;GO:0006351 transcription, DNA-templated		Transcription factors/Zinc-coordinating DNA-binding domains	Cytosol(Approved)				0.0	0.0	0.0	0.0	0.0	0.0	0.0	0.0	0.0	0.0	0.0	0.0	0.0	0.0	0.0	0.0	0.0	0.0	0.0	0.0
ENSG00000128512	9732	ensembl_gene_id	H. sapiens	9732	H. sapiens	DOCK4	dedicator of cytokinesis 4	GO:1904694 negative regulation of vascular smooth muscle contraction;GO:0003056 regulation of vascular smooth muscle contraction;GO:0045906 negative regulation of vasoconstriction			Plasma membrane(Supported)Cytosol;Golgi apparatus;Nucleoli(Approved)		(M186)PID PDGFRB PATHWAY	(M5893)HALLMARK MITOTIC SPINDLE; (M5921)HALLMARK COMPLEMENT	1.0	0.0	0.0	0.0	0.0	0.0	1.0	0.0	0.0	0.0	0.0	0.0	0.0	0.0	0.0	0.0	0.0	0.0	0.0	0.0
ENSG00000179456	10472	ensembl_gene_id	H. sapiens	10472	H. sapiens	ZBTB18	zinc finger and BTB domain containing 18	GO:0007519 skeletal muscle tissue development;GO:0060538 skeletal muscle organ development;GO:0000122 negative regulation of transcription by RNA polymerase II		Transcription factors/Zinc-coordinating DNA-binding domains					0.0	0.0	0.0	0.0	0.0	0.0	0.0	0.0	0.0	0.0	0.0	0.0	0.0	0.0	0.0	0.0	0.0	1.0	0.0	0.0
ENSG00000100292	3162	ensembl_gene_id	H. sapiens	3162	H. sapiens	HMOX1	heme oxygenase 1	GO:0032764 negative regulation of mast cell cytokine production;GO:0043305 negative regulation of mast cell degranulation;GO:1903589 positive regulation of blood vessel endothelial cell proliferation involved in sprouting angiogenesis		Enzymes/ENZYME proteins/Oxidoreductases	Golgi apparatus;Plasma membrane(Uncertain)	NADH (Signal transducer activity);Formic Acid (Signal transducer activity);Biliverdine Ix Alpha (Signal transducer activity);12-Phenylheme (Signal transducer activity);2-Phenylheme (Signal transducer activity);Verdoheme (Signal transducer activity);Stannsoporfin (Signal transducer activity);1-({2-[2-(4-CHLOROPHENYL)ETHYL]-1,3-DIOXOLAN-2-YL}METHYL)-1H-IMIDAZOLE (Signal transducer activity);1-(adam…	(M65)PID FRA PATHWAY; (M255)PID HIF1 TFPATHWAY	(M5897)HALLMARK IL6 JAK STAT3 SIGNALING; (M5941)HALLMARK UV RESPONSE UP; (M5902)HALLMARK APOPTOSIS	1.0	0.0	1.0	0.0	0.0	1.0	1.0	0.0	0.0	1.0	1.0	0.0	0.0	0.0	0.0	1.0	0.0	0.0	0.0	0.0
ENSG00000196535	399687	ensembl_gene_id	H. sapiens	399687	H. sapiens	MYO18A	myosin XVIIIA	GO:1903028 positive regulation of opsonization;GO:1903027 regulation of opsonization;GO:0090164 asymmetric Golgi ribbon formation							0.0	0.0	1.0	0.0	0.0	0.0	0.0	0.0	0.0	0.0	0.0	0.0	0.0	0.0	0.0	0.0	0.0	0.0	0.0	0.0
ENSG00000168140	114990	ensembl_gene_id	H. sapiens	114990	H. sapiens	VASN	vasorin	GO:0071461 cellular response to redox state;GO:0010719 negative regulation of epithelial to mesenchymal transition;GO:0030512 negative regulation of transforming growth factor beta receptor signaling pathway			Mitochondria;Nucleoli;Nucleus(Approved)				0.0	0.0	0.0	0.0	0.0	0.0	0.0	0.0	1.0	0.0	0.0	0.0	0.0	0.0	0.0	0.0	0.0	0.0	0.0	0.0
ENSG00000136295	80727	ensembl_gene_id	H. sapiens	80727	H. sapiens	TTYH3	tweety family member 3	GO:1902476 chloride transmembrane transport;GO:0006821 chloride transport;GO:0098661 inorganic anion transmembrane transport							0.0	0.0	0.0	0.0	0.0	0.0	0.0	0.0	0.0	0.0	0.0	0.0	0.0	0.0	0.0	0.0	0.0	0.0	0.0	0.0
ENSG00000165633	196740	ensembl_gene_id	H. sapiens	196740	H. sapiens	VSTM4	V-set and transmembrane domain containing 4				Nucleus;Vesicles(Approved)				0.0	0.0	0.0	0.0	0.0	0.0	0.0	0.0	0.0	0.0	0.0	0.0	0.0	0.0	0.0	0.0	0.0	0.0	0.0	0.0
ENSG00000065534	4638	ensembl_gene_id	H. sapiens	4638	H. sapiens	MYLK	myosin light chain kinase	GO:0060414 aorta smooth muscle tissue morphogenesis;GO:0035909 aorta morphogenesis;GO:0071476 cellular hypotonic response	CAMK Ser/Thr protein kinase family	Enzymes/{ENZYME proteins/Transferases,Kinases/CAMK Ser/Thr protein kinases}	Actin filaments(Enhanced)Plasma membrane(Supported)		(M16801)SIG REGULATION OF THE ACTIN CYTOSKELETON BY RHO GTPASES; (M14)PID AURORA B PATHWAY; (M5193)SIG CHEMOTAXIS	(M5905)HALLMARK ADIPOGENESIS; (M5909)HALLMARK MYOGENESIS; (M5930)HALLMARK EPITHELIAL MESENCHYMAL TRANSITION	1.0	1.0	0.0	0.0	0.0	1.0	0.0	0.0	0.0	1.0	0.0	0.0	0.0	0.0	0.0	0.0	0.0	1.0	0.0	0.0
ENSG00000131435	8572	ensembl_gene_id	H. sapiens	8572	H. sapiens	PDLIM4	PDZ and LIM domain 4	GO:0098976 excitatory chemical synaptic transmission;GO:0031532 actin cytoskeleton reorganization;GO:0007268 chemical synaptic transmission			Actin filaments;Cytosol(Approved)			(M5930)HALLMARK EPITHELIAL MESENCHYMAL TRANSITION	0.0	0.0	0.0	0.0	0.0	0.0	0.0	0.0	0.0	0.0	0.0	0.0	0.0	0.0	0.0	0.0	0.0	1.0	0.0	0.0
ENSG00000065923	84679	ensembl_gene_id	H. sapiens	84679	H. sapiens	SLC9A7	solute carrier family 9 member A7	GO:1905526 regulation of Golgi lumen acidification;GO:0061795 Golgi lumen acidification;GO:0032847 regulation of cellular pH reduction		Transporters/Electrochemical Potential-driven transporters	Vesicles(Supported)				0.0	0.0	0.0	0.0	0.0	0.0	0.0	0.0	0.0	0.0	0.0	0.0	0.0	0.0	0.0	0.0	0.0	0.0	0.0	0.0
ENSG00000131873	22856	ensembl_gene_id	H. sapiens	22856	H. sapiens	CHSY1	chondroitin sulfate synthase 1	GO:0030206 chondroitin sulfate biosynthetic process;GO:0030204 chondroitin sulfate metabolic process;GO:0050650 chondroitin sulfate proteoglycan biosynthetic process		Enzymes/ENZYME proteins/Transferases					0.0	0.0	0.0	0.0	1.0	0.0	0.0	0.0	0.0	0.0	0.0	0.0	1.0	0.0	0.0	0.0	0.0	0.0	1.0	0.0
ENSG00000160271	5900	ensembl_gene_id	H. sapiens	5900	H. sapiens	RALGDS	ral guanine nucleotide dissociation stimulator	GO:0007265 Ras protein signal transduction;GO:0007264 small GTPase mediated signal transduction;GO:0050790 regulation of catalytic activity		RAS pathway related proteins	Nucleus(Approved)		(M164)PID ERBB1 DOWNSTREAM PATHWAY	(M5939)HALLMARK P53 PATHWAY	0.0	0.0	0.0	0.0	0.0	0.0	0.0	0.0	0.0	0.0	0.0	1.0	0.0	0.0	0.0	0.0	0.0	0.0	0.0	0.0
ENSG00000138036	51626	ensembl_gene_id	H. sapiens	51626	H. sapiens	DYNC2LI1	dynein cytoplasmic 2 light intermediate chain 1	GO:0035721 intraciliary retrograde transport;GO:0035735 intraciliary transport involved in cilium assembly;GO:0042073 intraciliary transport			Cytosol(Approved)				0.0	0.0	0.0	0.0	0.0	0.0	1.0	0.0	0.0	0.0	0.0	0.0	0.0	0.0	0.0	0.0	0.0	0.0	0.0	0.0
ENSG00000124496	55809	ensembl_gene_id	H. sapiens	55809	H. sapiens	TRERF1	transcriptional regulating factor 1	GO:0006707 cholesterol catabolic process;GO:0016127 sterol catabolic process;GO:0046885 regulation of hormone biosynthetic process		Transcription factors/{Helix-turn-helix domains,Zinc-coordinating DNA-binding domains}	Nucleoplasm(Enhanced)Cytosol(Uncertain)				0.0	0.0	0.0	0.0	0.0	0.0	0.0	0.0	0.0	0.0	0.0	0.0	0.0	0.0	0.0	0.0	0.0	0.0	0.0	0.0
ENSG00000110031	9404	ensembl_gene_id	H. sapiens	9404	H. sapiens	LPXN	leupaxin	GO:0050859 negative regulation of B cell receptor signaling pathway;GO:0050855 regulation of B cell receptor signaling pathway;GO:0050858 negative regulation of antigen receptor-mediated signaling pathway			Cytosol;Focal adhesion sites(Enhanced)Nuclear speckles(Supported)				0.0	0.0	1.0	0.0	0.0	0.0	0.0	0.0	0.0	0.0	0.0	0.0	0.0	0.0	0.0	0.0	0.0	0.0	0.0	0.0
ENSG00000131711	4131	ensembl_gene_id	H. sapiens	4131	H. sapiens	MAP1B	microtubule associated protein 1B	GO:0051915 induction of synaptic plasticity by chemical substance;GO:0051914 positive regulation of synaptic plasticity by chemical substance;GO:0051913 regulation of synaptic plasticity by chemical substance			Cytosol(Enhanced)		(M163)PID LIS1 PATHWAY; (M69)PID REELIN PATHWAY; (M108)PID NETRIN PATHWAY	(M5942)HALLMARK UV RESPONSE DN	0.0	0.0	0.0	0.0	0.0	0.0	1.0	0.0	1.0	1.0	0.0	0.0	0.0	0.0	0.0	0.0	0.0	0.0	0.0	0.0
ENSG00000072195	10290	ensembl_gene_id	H. sapiens	10290	H. sapiens	SPEG	striated muscle enriched protein kinase	GO:0007517 muscle organ development;GO:0042692 muscle cell differentiation;GO:0008285 negative regulation of cell proliferation	CAMK Ser/Thr protein kinase family	Enzymes/{ENZYME proteins/Transferases,Kinases/CAMK Ser/Thr protein kinases}	Vesicles(Approved)			(M5909)HALLMARK MYOGENESIS; (M5915)HALLMARK APICAL JUNCTION	0.0	0.0	0.0	0.0	0.0	0.0	0.0	0.0	0.0	0.0	1.0	0.0	0.0	0.0	0.0	0.0	0.0	1.0	0.0	0.0
ENSG00000121068	6909	ensembl_gene_id	H. sapiens	6909	H. sapiens	TBX2	T-box transcription factor 2	GO:1901208 negative regulation of heart looping;GO:1901211 negative regulation of cardiac chamber formation;GO:1901210 regulation of cardiac chamber formation		Transcription factors/Immunoglobulin fold	Cytosol;Nucleoplasm(Approved)				0.0	1.0	0.0	0.0	0.0	1.0	1.0	0.0	0.0	0.0	0.0	0.0	1.0	0.0	0.0	0.0	0.0	1.0	0.0	0.0
ENSG00000183762	83999	ensembl_gene_id	H. sapiens	83999	H. sapiens	KREMEN1	kringle containing transmembrane protein 1	GO:0048681 negative regulation of axon regeneration;GO:0070571 negative regulation of neuron projection regeneration;GO:0048679 regulation of axon regeneration			Cytosol;Nuclear bodies;Nucleoplasm(Approved)		(M77)PID WNT SIGNALING PATHWAY; (M5493)WNT SIGNALING		0.0	0.0	0.0	0.0	1.0	0.0	1.0	0.0	0.0	1.0	0.0	0.0	0.0	0.0	0.0	0.0	0.0	0.0	0.0	0.0
ENSG00000060656	10076	ensembl_gene_id	H. sapiens	10076	H. sapiens	PTPRU	protein tyrosine phosphatase receptor type U	GO:2000049 positive regulation of cell-cell adhesion mediated by cadherin;GO:0007185 transmembrane receptor protein tyrosine phosphatase signaling pathway;GO:2000047 regulation of cell-cell adhesion mediated by cadherin		Enzymes/ENZYME proteins/Hydrolases			(M19336)ST TYPE I INTERFERON PATHWAY; (M5248)ST JAK STAT PATHWAY; (M4170)ST INTERFERON GAMMA PATHWAY		0.0	0.0	1.0	0.0	0.0	0.0	0.0	0.0	0.0	0.0	1.0	1.0	0.0	0.0	0.0	0.0	0.0	0.0	0.0	0.0
ENSG00000114054	5096	ensembl_gene_id	H. sapiens	5096	H. sapiens	PCCB	propionyl-CoA carboxylase subunit beta	GO:0019626 short-chain fatty acid catabolic process;GO:0006768 biotin metabolic process;GO:0046459 short-chain fatty acid metabolic process		Enzymes/ENZYME proteins/Ligase		Biotin (Propionyl-coa carboxylase activity);L-Valine (Propionyl-coa carboxylase activity)			0.0	0.0	0.0	0.0	0.0	0.0	0.0	0.0	0.0	0.0	0.0	0.0	0.0	0.0	0.0	0.0	0.0	0.0	0.0	0.0
ENSG00000013375	5238	ensembl_gene_id	H. sapiens	5238	H. sapiens	PGM3	phosphoglucomutase 3	GO:0006041 glucosamine metabolic process;GO:0019255 glucose 1-phosphate metabolic process;GO:0006048 UDP-N-acetylglucosamine biosynthetic process		Enzymes/ENZYME proteins/Isomerase	Cytosol;Nucleoplasm(Approved)			(M5908)HALLMARK ANDROGEN RESPONSE	0.0	0.0	0.0	0.0	0.0	0.0	0.0	0.0	0.0	0.0	0.0	0.0	0.0	0.0	0.0	0.0	0.0	0.0	0.0	0.0
ENSG00000127824	7277	ensembl_gene_id	H. sapiens	7277	H. sapiens	TUBA4A	tubulin alpha 4a	GO:0097711 ciliary basal body-plasma membrane docking;GO:0002576 platelet degranulation;GO:0010389 regulation of G2/M transition of mitotic cell cycle			Microtubules(Enhanced)	Vincristine (Structural constituent of cytoskeleton);Podofilox (Structural constituent of cytoskeleton);Epothilone D (Structural constituent of cytoskeleton);Epothilone B (Structural constituent of cytoskeleton);CYT997 (Structural constituent of cytoskeleton);S-8184 (Structural constituent of cytoskeleton);Cabazitaxel (Structural constituent of cytoskeleton)		(M5941)HALLMARK UV RESPONSE UP; (M5893)HALLMARK MITOTIC SPINDLE; (M5924)HALLMARK MTORC1 SIGNALING	0.0	0.0	0.0	0.0	0.0	0.0	0.0	0.0	0.0	0.0	0.0	0.0	0.0	0.0	0.0	0.0	0.0	0.0	0.0	0.0
ENSG00000160469	84446	ensembl_gene_id	H. sapiens	84446	H. sapiens	BRSK1	BR serine/threonine kinase 1	GO:0090176 microtubule cytoskeleton organization involved in establishment of planar polarity;GO:0007095 mitotic G2 DNA damage checkpoint;GO:2000807 regulation of synaptic vesicle clustering	CAMK Ser/Thr protein kinase family	Enzymes/{ENZYME proteins/Transferases,Kinases/CAMK Ser/Thr protein kinases}	Nucleoplasm(Supported)		(M87)PID LKB1 PATHWAY		0.0	1.0	0.0	0.0	0.0	0.0	1.0	0.0	0.0	0.0	0.0	0.0	0.0	0.0	0.0	0.0	0.0	0.0	0.0	0.0
ENSG00000123358	3164	ensembl_gene_id	H. sapiens	3164	H. sapiens	NR4A1	nuclear receptor subfamily 4 group A member 1	GO:0071376 cellular response to corticotropin-releasing hormone stimulus;GO:0043435 response to corticotropin-releasing hormone;GO:0002042 cell migration involved in sprouting angiogenesis		Nuclear receptors;Transcription factors/Zinc-coordinating DNA-binding domains	Cytosol;Nucleus(Supported)		(M162)PID RXR VDR PATHWAY; (M113)PID NFAT 3PATHWAY; (M115)PID REG GR PATHWAY	(M5941)HALLMARK UV RESPONSE UP; (M5890)HALLMARK TNFA SIGNALING VIA NFKB	0.0	0.0	0.0	0.0	0.0	1.0	1.0	0.0	1.0	0.0	0.0	0.0	0.0	0.0	0.0	0.0	0.0	0.0	0.0	0.0
ENSG00000171813	170394	ensembl_gene_id	H. sapiens	170394	H. sapiens	PWWP2B	PWWP domain containing 2B				Nucleoplasm(Enhanced)				0.0	0.0	0.0	0.0	0.0	0.0	0.0	0.0	0.0	0.0	0.0	0.0	0.0	0.0	0.0	0.0	0.0	0.0	0.0	0.0
ENSG00000128805	58504	ensembl_gene_id	H. sapiens	58504	H. sapiens	ARHGAP22	Rho GTPase activating protein 22	GO:0099175 regulation of postsynapse organization;GO:0001525 angiogenesis;GO:0099173 postsynapse organization			Cytosol;Nucleoplasm;Plasma membrane(Supported)				0.0	0.0	0.0	0.0	0.0	1.0	0.0	0.0	0.0	0.0	0.0	0.0	0.0	0.0	0.0	0.0	0.0	0.0	0.0	0.0
ENSG00000104679	203069	ensembl_gene_id	H. sapiens	203069	H. sapiens	R3HCC1	R3H domain and coiled-coil containing 1				Cytosol;Nucleoplasm(Approved)				0.0	0.0	0.0	0.0	0.0	0.0	0.0	0.0	0.0	0.0	0.0	0.0	0.0	0.0	0.0	0.0	0.0	0.0	0.0	0.0
ENSG00000124508	10385	ensembl_gene_id	H. sapiens	10385	H. sapiens	BTN2A2	butyrophilin subfamily 2 member A2	GO:0050860 negative regulation of T cell receptor signaling pathway;GO:0045591 positive regulation of regulatory T cell differentiation;GO:0046007 negative regulation of activated T cell proliferation			Mitochondria(Supported)				0.0	0.0	1.0	1.0	0.0	0.0	0.0	0.0	0.0	0.0	1.0	0.0	0.0	1.0	0.0	0.0	0.0	0.0	0.0	0.0
ENSG00000140937	1009	ensembl_gene_id	H. sapiens	1009	H. sapiens	CDH11	cadherin 11	GO:0021957 corticospinal tract morphogenesis;GO:0021952 central nervous system projection neuron axonogenesis;GO:0021955 central nervous system neuron axonogenesis						(M5915)HALLMARK APICAL JUNCTION; (M5930)HALLMARK EPITHELIAL MESENCHYMAL TRANSITION	0.0	0.0	0.0	0.0	1.0	0.0	1.0	0.0	0.0	0.0	0.0	0.0	1.0	0.0	0.0	0.0	0.0	0.0	0.0	0.0
ENSG00000167470	90007	ensembl_gene_id	H. sapiens	90007	H. sapiens	MIDN	midnolin	GO:0033132 negative regulation of glucokinase activity;GO:1903300 negative regulation of hexokinase activity;GO:0033131 regulation of glucokinase activity			Nucleoplasm(Approved)				0.0	0.0	0.0	0.0	0.0	0.0	0.0	0.0	0.0	0.0	0.0	0.0	0.0	1.0	0.0	0.0	0.0	0.0	0.0	0.0
ENSG00000184117	8508	ensembl_gene_id	H. sapiens	8508	H. sapiens	NIPSNAP1	nipsnap homolog 1	GO:0019233 sensory perception of pain;GO:0007600 sensory perception;GO:0050877 nervous system process							0.0	0.0	0.0	0.0	0.0	0.0	0.0	0.0	0.0	0.0	0.0	0.0	0.0	0.0	0.0	0.0	0.0	0.0	0.0	0.0
ENSG00000138061	1545	ensembl_gene_id	H. sapiens	1545	H. sapiens	CYP1B1	cytochrome P450 family 1 subfamily B member 1	GO:0061304 retinal blood vessel morphogenesis;GO:0097267 omega-hydroxylase P450 pathway;GO:0002930 trabecular meshwork development		Enzymes/ENZYME proteins/Oxidoreductases	Mitochondria(Uncertain)	2-Methoxyestradiol (Oxygen binding)			0.0	0.0	1.0	0.0	0.0	1.0	0.0	1.0	0.0	0.0	1.0	0.0	0.0	0.0	0.0	1.0	0.0	0.0	0.0	0.0
ENSG00000159214	149473	ensembl_gene_id	H. sapiens	149473	H. sapiens	CCDC24	coiled-coil domain containing 24	GO:0001835 blastocyst hatching;GO:0035188 hatching;GO:0001824 blastocyst development			Cytosol;Plasma membrane(Enhanced)				0.0	0.0	0.0	0.0	0.0	0.0	0.0	0.0	0.0	0.0	0.0	0.0	0.0	0.0	0.0	0.0	0.0	0.0	0.0	0.0
ENSG00000167106	399665	ensembl_gene_id	H. sapiens	399665	H. sapiens	FAM102A	family with sequence similarity 102 member A				Cytosol(Approved)			(M5906)HALLMARK ESTROGEN RESPONSE EARLY; (M5907)HALLMARK ESTROGEN RESPONSE LATE	0.0	0.0	0.0	0.0	0.0	0.0	0.0	0.0	0.0	0.0	0.0	0.0	0.0	0.0	0.0	0.0	0.0	0.0	0.0	0.0
ENSG00000179833	9792	ensembl_gene_id	H. sapiens	9792	H. sapiens	SERTAD2	SERTA domain containing 2	GO:0030308 negative regulation of cell growth;GO:0045926 negative regulation of growth;GO:0001558 regulation of cell growth			Cytosol;Nucleoplasm(Supported)				0.0	0.0	0.0	0.0	0.0	0.0	0.0	0.0	0.0	0.0	0.0	0.0	0.0	0.0	0.0	0.0	0.0	0.0	0.0	0.0
ENSG00000187024	138428	ensembl_gene_id	H. sapiens	138428	H. sapiens	PTRH1	peptidyl-tRNA hydrolase 1 homolog			Enzymes/ENZYME proteins/Hydrolases					0.0	0.0	0.0	0.0	0.0	0.0	0.0	0.0	0.0	0.0	0.0	0.0	0.0	0.0	0.0	0.0	0.0	0.0	0.0	0.0
ENSG00000116191	55103	ensembl_gene_id	H. sapiens	55103	H. sapiens	RALGPS2	Ral GEF with PH domain and SH3 binding motif 2	GO:0032485 regulation of Ral protein signal transduction;GO:0032484 Ral protein signal transduction;GO:0046578 regulation of Ras protein signal transduction			Cytosol;Nucleoplasm(Uncertain)				0.0	0.0	0.0	0.0	0.0	0.0	0.0	0.0	0.0	0.0	0.0	0.0	0.0	0.0	0.0	0.0	0.0	0.0	0.0	0.0
ENSG00000054983	2581	ensembl_gene_id	H. sapiens	2581	H. sapiens	GALC	galactosylceramidase	GO:0006683 galactosylceramide catabolic process;GO:0019376 galactolipid catabolic process;GO:0046477 glycosylceramide catabolic process		Enzymes/ENZYME proteins/Hydrolases				(M5910)HALLMARK PROTEIN SECRETION	0.0	0.0	0.0	0.0	0.0	0.0	0.0	0.0	0.0	0.0	0.0	0.0	0.0	0.0	0.0	0.0	0.0	0.0	0.0	0.0
ENSG00000196754	6273	ensembl_gene_id	H. sapiens	6273	H. sapiens	S100A2	S100 calcium binding protein A2	GO:0043542 endothelial cell migration;GO:0010631 epithelial cell migration;GO:0090132 epithelium migration			Cytosol;Nucleus(Supported)Nucleoli;Plasma membrane(Approved)	Olopatadine (Identical protein binding)	(M256)PID TAP63 PATHWAY; (M19)PID P73PATHWAY; (M145)PID P53 DOWNSTREAM PATHWAY		0.0	0.0	0.0	0.0	0.0	1.0	0.0	0.0	0.0	0.0	0.0	0.0	0.0	0.0	1.0	0.0	0.0	0.0	0.0	0.0
ENSG00000186310	4675	ensembl_gene_id	H. sapiens	4675	H. sapiens	NAP1L3	nucleosome assembly protein 1 like 3	GO:0006334 nucleosome assembly;GO:0031497 chromatin assembly;GO:0034728 nucleosome organization			Vesicles(Approved)				0.0	0.0	0.0	0.0	0.0	0.0	0.0	0.0	0.0	0.0	0.0	0.0	0.0	0.0	0.0	0.0	0.0	0.0	0.0	0.0
ENSG00000196182	83931	ensembl_gene_id	H. sapiens	83931	H. sapiens	STK40	serine/threonine kinase 40	GO:0048286 lung alveolus development;GO:0060425 lung morphogenesis;GO:0003016 respiratory system process	CAMK Ser/Thr protein kinase family	Enzymes/{ENZYME proteins/Transferases,Kinases/CAMK Ser/Thr protein kinases}	Cytosol;Nucleoplasm(Supported)				0.0	0.0	0.0	1.0	0.0	0.0	1.0	0.0	0.0	0.0	0.0	0.0	0.0	0.0	0.0	0.0	0.0	0.0	0.0	0.0
ENSG00000164543	9263	ensembl_gene_id	H. sapiens	9263	H. sapiens	STK17A	serine/threonine kinase 17a	GO:2000271 positive regulation of fibroblast apoptotic process;GO:2000269 regulation of fibroblast apoptotic process;GO:0044346 fibroblast apoptotic process	CAMK Ser/Thr protein kinase family	Enzymes/{ENZYME proteins/Transferases,Kinases/CAMK Ser/Thr protein kinases}	Nuclear speckles(Supported)Plasma membrane(Approved)				0.0	0.0	0.0	0.0	0.0	0.0	0.0	0.0	0.0	0.0	0.0	0.0	0.0	0.0	0.0	1.0	0.0	0.0	0.0	0.0
ENSG00000153815	80790	ensembl_gene_id	H. sapiens	80790	H. sapiens	CMIP	c-Maf inducing protein	GO:0001701 in utero embryonic development;GO:0043009 chordate embryonic development;GO:0009792 embryo development ending in birth or egg hatching			Cytosol;Nucleoplasm(Supported)				0.0	0.0	0.0	0.0	0.0	0.0	0.0	0.0	0.0	0.0	0.0	0.0	0.0	0.0	0.0	0.0	0.0	0.0	0.0	0.0
ENSG00000172059	8462	ensembl_gene_id	H. sapiens	8462	H. sapiens	KLF11	Kruppel like factor 11	GO:0000083 regulation of transcription involved in G1/S transition of mitotic cell cycle;GO:0000082 G1/S transition of mitotic cell cycle;GO:0044843 cell cycle G1/S phase transition		Transcription factors/Zinc-coordinating DNA-binding domains	Nucleoplasm(Supported)Cytosol;Focal adhesion sites(Uncertain)				0.0	0.0	0.0	0.0	0.0	0.0	0.0	0.0	0.0	0.0	1.0	0.0	0.0	0.0	0.0	1.0	0.0	0.0	0.0	0.0
ENSG00000171206	81603	ensembl_gene_id	H. sapiens	81603	H. sapiens	TRIM8	tripartite motif containing 8	GO:1902187 negative regulation of viral release from host cell;GO:0046597 negative regulation of viral entry into host cell;GO:1902186 regulation of viral release from host cell		Enzymes/ENZYME proteins/Transferases	Cytosol;Nucleoplasm;Vesicles(Enhanced)				0.0	0.0	0.0	0.0	0.0	0.0	0.0	0.0	0.0	0.0	0.0	0.0	0.0	0.0	0.0	0.0	0.0	0.0	0.0	0.0
ENSG00000148606	11128	ensembl_gene_id	H. sapiens	11128	H. sapiens	POLR3A	RNA polymerase III subunit A	GO:0032728 positive regulation of interferon-beta production;GO:0032648 regulation of interferon-beta production;GO:0032481 positive regulation of type I interferon production		Enzymes/ENZYME proteins/Transferases;RNA polymerase related proteins	Nucleoplasm(Supported)				0.0	0.0	0.0	0.0	0.0	0.0	0.0	0.0	0.0	0.0	0.0	0.0	0.0	0.0	0.0	0.0	0.0	0.0	0.0	0.0
ENSG00000184508	374659	ensembl_gene_id	H. sapiens	374659	H. sapiens	HDDC3	HD domain containing 3			Enzymes/ENZYME proteins/Hydrolases	Cytosol;Nucleoplasm(Approved)				0.0	0.0	0.0	0.0	0.0	0.0	0.0	0.0	0.0	0.0	0.0	0.0	0.0	0.0	0.0	0.0	0.0	0.0	0.0	0.0
ENSG00000135622	10505	ensembl_gene_id	H. sapiens	10505	H. sapiens	SEMA4F	ssemaphorin 4F	GO:0048843 negative regulation of axon extension involved in axon guidance;GO:0048841 regulation of axon extension involved in axon guidance;GO:1902668 negative regulation of axon guidance			Centrosome;Nucleus;Plasma membrane(Approved)		(M5880)NABA ECM AFFILIATED; (M5885)NABA MATRISOME ASSOCIATED; (M5889)NABA MATRISOME		1.0	0.0	0.0	0.0	0.0	1.0	1.0	0.0	0.0	1.0	0.0	0.0	0.0	0.0	1.0	0.0	0.0	0.0	0.0	0.0
ENSG00000108439	55163	ensembl_gene_id	H. sapiens	55163	H. sapiens	PNPO	pyridoxamine 5'-phosphate oxidase	GO:0008615 pyridoxine biosynthetic process;GO:0042823 pyridoxal phosphate biosynthetic process;GO:0008614 pyridoxine metabolic process		Enzymes/ENZYME proteins/Oxidoreductases	Cytosol;Nucleoplasm(Supported)	Pyridoxal Phosphate (Pyridoxamine-phosphate oxidase activity);Riboflavin Monophosphate (Pyridoxamine-phosphate oxidase activity);Beta-Mercaptoethanol (Pyridoxamine-phosphate oxidase activity)			0.0	0.0	0.0	0.0	0.0	0.0	0.0	0.0	0.0	0.0	0.0	0.0	0.0	0.0	0.0	0.0	0.0	0.0	0.0	0.0
ENSG00000170365	4086	ensembl_gene_id	H. sapiens	4086	H. sapiens	SMAD1	SMAD family member 1	GO:0031053 primary miRNA processing;GO:1903672 positive regulation of sprouting angiogenesis;GO:0001710 mesodermal cell fate commitment		Transcription factors	Cytosol;Nucleus;Plasma membrane(Supported)		(M203)PID ALK2 PATHWAY; (M185)PID ALK1 PATHWAY; (M181)PID BMP PATHWAY	(M5896)HALLMARK TGF BETA SIGNALING	0.0	1.0	0.0	0.0	1.0	1.0	1.0	0.0	1.0	0.0	1.0	0.0	1.0	0.0	0.0	0.0	0.0	1.0	1.0	0.0
ENSG00000004139	23098	ensembl_gene_id	H. sapiens	23098	H. sapiens	SARM1	sterile alpha and TIR motif containing 1	GO:0034128 negative regulation of MyD88-independent toll-like receptor signaling pathway;GO:0034127 regulation of MyD88-independent toll-like receptor signaling pathway;GO:0034122 negative regulation of toll-like receptor signaling pathway			Vesicles(Approved)				0.0	0.0	1.0	0.0	0.0	0.0	1.0	0.0	0.0	1.0	0.0	0.0	0.0	0.0	0.0	1.0	0.0	0.0	0.0	0.0
ENSG00000008083	3720	ensembl_gene_id	H. sapiens	3720	H. sapiens	JARID2	jumonji and AT-rich interaction domain containing 2	GO:0034721 histone H3-K4 demethylation, trimethyl-H3-K4-specific;GO:0060044 negative regulation of cardiac muscle cell proliferation;GO:0051574 positive regulation of histone H3-K9 methylation		Transcription factors/Helix-turn-helix domains	Nucleus(Supported)Mitochondria(Approved)				0.0	0.0	0.0	0.0	0.0	0.0	1.0	0.0	0.0	0.0	1.0	0.0	0.0	1.0	0.0	0.0	0.0	1.0	0.0	0.0
ENSG00000183023	6546	ensembl_gene_id	H. sapiens	6546	H. sapiens	SLC8A1	solute carrier family 8 member A1	GO:0010881 regulation of cardiac muscle contraction by regulation of the release of sequestered calcium ion;GO:0010880 regulation of release of sequestered calcium ion into cytosol by sarcoplasmic reticulum;GO:0014808 release of sequestered calcium ion into cytosol by sarcoplasmic reticulum		Transporters/Electrochemical Potential-driven transporters	Plasma membrane(Supported)Nucleoplasm(Approved)	Alpha-Linolenic Acid (Ion channel binding);Icosapent (Ion channel binding)			1.0	0.0	0.0	1.0	1.0	1.0	1.0	0.0	0.0	0.0	0.0	0.0	0.0	1.0	0.0	0.0	0.0	1.0	0.0	0.0
ENSG00000112245	7803	ensembl_gene_id	H. sapiens	7803	H. sapiens	PTP4A1	protein tyrosine phosphatase 4A1	GO:0035335 peptidyl-tyrosine dephosphorylation;GO:0030335 positive regulation of cell migration;GO:2000147 positive regulation of cell motility		Enzymes/ENZYME proteins/Hydrolases			(M11)PID PRL SIGNALING EVENTS PATHWAY		1.0	0.0	0.0	0.0	0.0	0.0	0.0	0.0	0.0	0.0	0.0	0.0	0.0	0.0	0.0	0.0	0.0	0.0	0.0	0.0
ENSG00000254122	56099	ensembl_gene_id	H. sapiens	56099	H. sapiens	PCDHGB7	protocadherin gamma subfamily B, 7	GO:0007156 homophilic cell adhesion via plasma membrane adhesion molecules;GO:0098742 cell-cell adhesion via plasma-membrane adhesion molecules;GO:0098609 cell-cell adhesion			Cytosol;Nucleus;Plasma membrane;Vesicles(Approved)				0.0	0.0	0.0	0.0	0.0	0.0	0.0	0.0	0.0	0.0	0.0	0.0	0.0	0.0	0.0	0.0	0.0	0.0	0.0	0.0
ENSG00000143458	126626	ensembl_gene_id	H. sapiens	126626	H. sapiens	GABPB2	GA binding protein transcription factor subunit beta 2	GO:0045944 positive regulation of transcription by RNA polymerase II;GO:0045893 positive regulation of transcription, DNA-templated;GO:1903508 positive regulation of nucleic acid-templated transcription			Nucleoplasm(Supported)Cytosol(Approved)				0.0	0.0	0.0	0.0	0.0	0.0	0.0	0.0	0.0	0.0	0.0	0.0	0.0	0.0	0.0	0.0	0.0	0.0	0.0	0.0
ENSG00000119326	8727	ensembl_gene_id	H. sapiens	8727	H. sapiens	CTNNAL1	catenin alpha like 1	GO:0007266 Rho protein signal transduction;GO:0007265 Ras protein signal transduction;GO:0007264 small GTPase mediated signal transduction							0.0	0.0	0.0	0.0	0.0	0.0	0.0	0.0	0.0	0.0	0.0	0.0	0.0	0.0	0.0	0.0	0.0	0.0	0.0	0.0
ENSG00000130669	10298	ensembl_gene_id	H. sapiens	10298	H. sapiens	PAK4	p21 (RAC1) activated kinase 4	GO:2000352 negative regulation of endothelial cell apoptotic process;GO:1904036 negative regulation of epithelial cell apoptotic process;GO:0045766 positive regulation of angiogenesis	STE Ser/Thr protein kinase family	Enzymes/{ENZYME proteins/Transferases,Kinases/STE Ser/Thr protein kinases};RAS pathway related proteins	Cell Junctions;Plasma membrane(Supported)		(M16801)SIG REGULATION OF THE ACTIN CYTOSKELETON BY RHO GTPASES; (M5193)SIG CHEMOTAXIS; (M9526)ST T CELL SIGNAL TRANSDUCTION	(M5923)HALLMARK PI3K AKT MTOR SIGNALING	0.0	0.0	0.0	1.0	0.0	1.0	0.0	0.0	0.0	0.0	0.0	0.0	0.0	0.0	0.0	0.0	0.0	0.0	0.0	0.0
ENSG00000065054	9351	ensembl_gene_id	H. sapiens	9351	H. sapiens	SLC9A3R2	SLC9A3 regulator 2	GO:0065003 protein-containing complex assembly;GO:0043933 protein-containing complex subunit organization;GO:0022607 cellular component assembly		Transporters/Accessory Factors Involved in Transport	Plasma membrane(Supported)		(M15)PID LYSOPHOSPHOLIPID PATHWAY; (M186)PID PDGFRB PATHWAY		0.0	0.0	0.0	0.0	0.0	0.0	0.0	0.0	0.0	0.0	0.0	0.0	0.0	0.0	0.0	0.0	0.0	0.0	0.0	0.0
ENSG00000284308	388963	ensembl_gene_id	H. sapiens	388963	H. sapiens	C2orf81	chromosome 2 open reading frame 81				Nucleoli fibrillar center;Nucleus(Approved)				0.0	0.0	0.0	0.0	0.0	0.0	0.0	0.0	0.0	0.0	0.0	0.0	0.0	0.0	0.0	0.0	0.0	0.0	0.0	0.0
ENSG00000196876	6334	ensembl_gene_id	H. sapiens	6334	H. sapiens	SCN8A	sodium voltage-gated channel alpha subunit 8	GO:0086010 membrane depolarization during action potential;GO:0019228 neuronal action potential;GO:0042552 myelination		Transporters/Transporter channels and pores;Voltage-gated ion channels/Voltage-Gated Sodium Channels		Tetrodotoxin (Voltage-gated sodium channel activity)		(M5942)HALLMARK UV RESPONSE DN	0.0	0.0	0.0	0.0	0.0	0.0	0.0	0.0	0.0	0.0	0.0	0.0	0.0	0.0	0.0	0.0	0.0	0.0	0.0	0.0
ENSG00000107738	64115	ensembl_gene_id	H. sapiens	64115	H. sapiens	VSIR	V-set immunoregulatory receptor	GO:2000565 negative regulation of CD8-positive, alpha-beta T cell proliferation;GO:2000562 negative regulation of CD4-positive, alpha-beta T cell proliferation;GO:2001186 negative regulation of CD8-positive, alpha-beta T cell activation			Nucleoplasm(Approved)				1.0	0.0	1.0	0.0	0.0	0.0	0.0	0.0	0.0	0.0	1.0	0.0	0.0	0.0	0.0	0.0	0.0	0.0	0.0	0.0
ENSG00000147894	203228	ensembl_gene_id	H. sapiens	203228	H. sapiens	C9orf72	C9orf72-SMCR8 complex subunit	GO:1904425 negative regulation of GTP binding;GO:1902774 late endosome to lysosome transport;GO:2000785 regulation of autophagosome assembly							0.0	0.0	0.0	0.0	0.0	0.0	1.0	0.0	0.0	0.0	0.0	0.0	0.0	1.0	0.0	0.0	0.0	0.0	0.0	0.0
ENSG00000115504	23301	ensembl_gene_id	H. sapiens	23301	H. sapiens	EHBP1	EH domain binding protein 1	GO:0006897 endocytosis;GO:0030036 actin cytoskeleton organization;GO:0098657 import into cell			Cytosol;Plasma membrane(Supported)				0.0	0.0	0.0	0.0	0.0	0.0	0.0	0.0	0.0	0.0	0.0	0.0	0.0	0.0	0.0	0.0	0.0	0.0	0.0	0.0
ENSG00000165698	11092	ensembl_gene_id	H. sapiens	11092	H. sapiens	SPACA9	sperm acrosome associated 9				Mitochondria(Approved)				0.0	0.0	0.0	0.0	0.0	0.0	0.0	0.0	0.0	0.0	0.0	0.0	0.0	0.0	0.0	0.0	0.0	0.0	0.0	0.0
ENSG00000188157	375790	ensembl_gene_id	H. sapiens	375790	H. sapiens	AGRN	agrin	GO:0045162 clustering of voltage-gated sodium channels;GO:0007213 G protein-coupled acetylcholine receptor signaling pathway;GO:0045887 positive regulation of synaptic growth at neuromuscular junction			Cytosol;Plasma membrane(Supported)		(M5887)NABA BASEMENT MEMBRANES; (M3008)NABA ECM GLYCOPROTEINS; (M5884)NABA CORE MATRISOME	(M5937)HALLMARK GLYCOLYSIS; (M5909)HALLMARK MYOGENESIS	0.0	0.0	0.0	0.0	0.0	0.0	1.0	1.0	0.0	0.0	0.0	0.0	0.0	0.0	0.0	0.0	0.0	0.0	0.0	0.0
ENSG00000137166	116113	ensembl_gene_id	H. sapiens	116113	H. sapiens	FOXP4	forkhead box P4	GO:0006357 regulation of transcription by RNA polymerase II;GO:0006366 transcription by RNA polymerase II;GO:0006355 regulation of transcription, DNA-templated		Transcription factors/Helix-turn-helix domains	Cytosol;Nucleoplasm(Approved)				0.0	0.0	0.0	0.0	0.0	0.0	0.0	0.0	0.0	0.0	0.0	0.0	0.0	0.0	0.0	0.0	0.0	0.0	0.0	0.0
ENSG00000125534	79144	ensembl_gene_id	H. sapiens	79144	H. sapiens	PPDPF	pancreatic progenitor cell differentiation and proliferation factor	GO:0030154 cell differentiation;GO:0048869 cellular developmental process;GO:0007275 multicellular organism development			Microtubules;Nucleoli;Nucleoplasm(Approved)				0.0	0.0	0.0	0.0	0.0	0.0	0.0	0.0	0.0	0.0	0.0	0.0	0.0	0.0	0.0	0.0	0.0	0.0	0.0	0.0
ENSG00000085117	3732	ensembl_gene_id	H. sapiens	3732	H. sapiens	CD82	CD82 molecule			CD markers	Vesicles(Approved)		(M200)PID ERA GENOMIC PATHWAY; (M145)PID P53 DOWNSTREAM PATHWAY	(M5932)HALLMARK INFLAMMATORY RESPONSE; (M5939)HALLMARK P53 PATHWAY	0.0	0.0	0.0	0.0	0.0	0.0	0.0	0.0	0.0	0.0	0.0	0.0	0.0	0.0	0.0	0.0	0.0	0.0	0.0	0.0
ENSG00000105711	6324	ensembl_gene_id	H. sapiens	6324	H. sapiens	SCN1B	sodium voltage-gated channel beta subunit 1	GO:0086047 membrane depolarization during Purkinje myocyte cell action potential;GO:0021966 corticospinal neuron axon guidance;GO:0086017 Purkinje myocyte action potential				Zonisamide (Voltage-gated sodium channel activity involved in purkinje myocyte action potential)		(M5932)HALLMARK INFLAMMATORY RESPONSE; (M5953)HALLMARK KRAS SIGNALING UP	0.0	0.0	0.0	0.0	0.0	0.0	1.0	0.0	0.0	0.0	0.0	0.0	0.0	0.0	0.0	0.0	0.0	0.0	0.0	0.0
ENSG00000179954	284297	ensembl_gene_id	H. sapiens	284297	H. sapiens	SSC5D	scavenger receptor cysteine rich family member with 5 domains	GO:0042494 detection of bacterial lipoprotein;GO:2000483 negative regulation of interleukin-8 secretion;GO:0016045 detection of bacterium			Cytosol;Nucleoplasm(Approved)				0.0	0.0	0.0	0.0	0.0	0.0	0.0	0.0	0.0	0.0	0.0	0.0	0.0	0.0	0.0	0.0	0.0	0.0	0.0	0.0
ENSG00000213047	163486	ensembl_gene_id	H. sapiens	163486	H. sapiens	DENND1B	DENN domain containing 1B	GO:0035745 T-helper 2 cell cytokine production;GO:0035743 CD4-positive, alpha-beta T cell cytokine production;GO:0050852 T cell receptor signaling pathway			Cytosol(Supported)Nuclear speckles(Approved)				0.0	0.0	0.0	0.0	0.0	0.0	0.0	0.0	0.0	0.0	0.0	0.0	0.0	0.0	0.0	0.0	0.0	0.0	0.0	0.0
ENSG00000184898	375287	ensembl_gene_id	H. sapiens	375287	H. sapiens	RBM43	RNA binding motif protein 43				Nucleoli;Nucleus(Approved)				0.0	0.0	0.0	0.0	0.0	0.0	0.0	0.0	0.0	0.0	0.0	0.0	0.0	0.0	0.0	0.0	0.0	0.0	0.0	0.0
ENSG00000162591	1953	ensembl_gene_id	H. sapiens	1953	H. sapiens	MEGF6	multiple EGF like domains 6	GO:0008150 biological_process			Cytokinetic bridge;Microtubules(Approved)		(M5883)NABA SECRETED FACTORS; (M5885)NABA MATRISOME ASSOCIATED; (M5889)NABA MATRISOME		0.0	0.0	0.0	0.0	0.0	0.0	0.0	0.0	0.0	0.0	0.0	0.0	0.0	0.0	1.0	0.0	0.0	0.0	0.0	0.0
ENSG00000101255	57761	ensembl_gene_id	H. sapiens	57761	H. sapiens	TRIB3	tribbles pseudokinase 3	GO:0045717 negative regulation of fatty acid biosynthetic process;GO:0032436 positive regulation of proteasomal ubiquitin-dependent protein catabolic process;GO:0045922 negative regulation of fatty acid metabolic process	CAMK Ser/Thr protein kinase family	Enzymes/Kinases/CAMK Ser/Thr protein kinases	Nuclear membrane;Nucleoli;Nucleus(Supported)			(M5892)HALLMARK CHOLESTEROL HOMEOSTASIS; (M5923)HALLMARK PI3K AKT MTOR SIGNALING; (M5939)HALLMARK P53 PATHWAY	0.0	0.0	0.0	1.0	0.0	0.0	0.0	0.0	0.0	0.0	0.0	1.0	0.0	1.0	0.0	0.0	0.0	0.0	0.0	0.0
ENSG00000198522	11321	ensembl_gene_id	H. sapiens	11321	H. sapiens	GPN1	GPN-loop GTPase 1				Cytosol;Nucleoplasm(Supported)Mitochondria(Approved)				0.0	0.0	0.0	0.0	0.0	0.0	0.0	0.0	0.0	0.0	0.0	0.0	0.0	0.0	0.0	0.0	0.0	0.0	0.0	0.0
ENSG00000174807	57124	ensembl_gene_id	H. sapiens	57124	H. sapiens	CD248	CD248 molecule	GO:2000353 positive regulation of endothelial cell apoptotic process;GO:1904037 positive regulation of epithelial cell apoptotic process;GO:2000351 regulation of endothelial cell apoptotic process		CD markers	Plasma membrane(Supported)Nucleoplasm(Approved)				0.0	0.0	0.0	0.0	0.0	0.0	0.0	0.0	0.0	0.0	0.0	0.0	0.0	0.0	0.0	1.0	0.0	0.0	0.0	0.0
ENSG00000151883	79668	ensembl_gene_id	H. sapiens	79668	H. sapiens	PARP8	poly(ADP-ribose) polymerase family member 8	GO:0070213 protein auto-ADP-ribosylation;GO:0006471 protein ADP-ribosylation;GO:0030968 endoplasmic reticulum unfolded protein response		Enzymes/ENZYME proteins/Transferases	Cell Junctions;Cytosol;Midbody ring;Nucleoplasm(Approved)				0.0	0.0	0.0	1.0	0.0	0.0	0.0	0.0	0.0	0.0	0.0	0.0	0.0	0.0	0.0	0.0	0.0	0.0	0.0	0.0
ENSG00000178105	1662	ensembl_gene_id	H. sapiens	1662	H. sapiens	DDX10	DEAD-box helicase 10	GO:0097065 anterior head development;GO:0006364 rRNA processing;GO:0016072 rRNA metabolic process		Enzymes/ENZYME proteins/Hydrolases	Nucleoli(Approved)			(M5922)HALLMARK UNFOLDED PROTEIN RESPONSE	0.0	0.0	0.0	0.0	0.0	0.0	0.0	0.0	0.0	0.0	0.0	0.0	0.0	0.0	0.0	0.0	0.0	0.0	0.0	0.0
ENSG00000064309	50937	ensembl_gene_id	H. sapiens	50937	H. sapiens	CDON	cell adhesion associated, oncogene regulated	GO:0060059 embryonic retina morphogenesis in camera-type eye;GO:0014816 skeletal muscle satellite cell differentiation;GO:0048643 positive regulation of skeletal muscle tissue development					(M211)PID HEDGEHOG 2PATHWAY	(M5942)HALLMARK UV RESPONSE DN	0.0	0.0	0.0	1.0	0.0	0.0	1.0	0.0	0.0	0.0	0.0	0.0	0.0	0.0	0.0	0.0	0.0	1.0	0.0	0.0
ENSG00000101384	182	ensembl_gene_id	H. sapiens	182	H. sapiens	JAG1	jagged canonical Notch ligand 1	GO:0072015 glomerular visceral epithelial cell development;GO:0061444 endocardial cushion cell development;GO:0072310 glomerular epithelial cell development		CD markers	Golgi apparatus;Plasma membrane(Supported)		(M256)PID TAP63 PATHWAY; (M17)PID NOTCH PATHWAY	(M5903)HALLMARK NOTCH SIGNALING; (M5944)HALLMARK ANGIOGENESIS; (M5895)HALLMARK WNT BETA CATENIN SIGNALING	0.0	1.0	1.0	0.0	1.0	1.0	1.0	0.0	0.0	0.0	0.0	0.0	0.0	0.0	0.0	0.0	1.0	1.0	0.0	0.0
ENSG00000123496	3598	ensembl_gene_id	H. sapiens	3598	H. sapiens	IL13RA2	interleukin 13 receptor subunit alpha 2	GO:0043305 negative regulation of mast cell degranulation;GO:0033007 negative regulation of mast cell activation involved in immune response;GO:0043301 negative regulation of leukocyte degranulation		CD markers		AER001 (Signal transducer activity)	(M17580)ST IL 13 PATHWAY; (M28)PID IL4 2PATHWAY	(M5951)HALLMARK SPERMATOGENESIS	0.0	0.0	1.0	0.0	0.0	0.0	0.0	0.0	0.0	0.0	0.0	0.0	0.0	0.0	0.0	0.0	0.0	0.0	0.0	0.0
ENSG00000181467	5912	ensembl_gene_id	H. sapiens	5912	H. sapiens	RAP2B	RAP2B, member of RAS oncogene family	GO:0090557 establishment of endothelial intestinal barrier;GO:0031954 positive regulation of protein autophosphorylation;GO:0061028 establishment of endothelial barrier						(M5939)HALLMARK P53 PATHWAY	0.0	0.0	0.0	0.0	0.0	0.0	0.0	0.0	0.0	1.0	0.0	0.0	0.0	0.0	0.0	0.0	1.0	0.0	0.0	0.0
ENSG00000107020	55848	ensembl_gene_id	H. sapiens	55848	H. sapiens	PLGRKT	plasminogen receptor with a C-terminal lysine	GO:0010756 positive regulation of plasminogen activation;GO:0010755 regulation of plasminogen activation;GO:0010954 positive regulation of protein processing			Mitochondria(Approved)				0.0	0.0	0.0	0.0	0.0	0.0	1.0	0.0	0.0	0.0	0.0	0.0	0.0	0.0	0.0	0.0	0.0	0.0	0.0	0.0
ENSG00000148356	90678	ensembl_gene_id	H. sapiens	90678	H. sapiens	LRSAM1	leucine rich repeat and sterile alpha motif containing 1	GO:1904417 positive regulation of xenophagy;GO:1904415 regulation of xenophagy;GO:2000786 positive regulation of autophagosome assembly		Enzymes/ENZYME proteins/Transferases	Cytosol(Approved)				0.0	0.0	0.0	0.0	0.0	0.0	0.0	0.0	0.0	0.0	0.0	0.0	0.0	0.0	0.0	0.0	0.0	0.0	0.0	0.0
ENSG00000162585	199990	ensembl_gene_id	H. sapiens	199990	H. sapiens	FAAP20	FA core complex associated protein 20	GO:0019985 translesion synthesis;GO:0000731 DNA synthesis involved in DNA repair;GO:0036297 interstrand cross-link repair			Nuclear bodies;Nucleoplasm(Supported)Cell Junctions(Uncertain)				0.0	0.0	0.0	0.0	0.0	0.0	0.0	0.0	0.0	0.0	0.0	0.0	0.0	0.0	0.0	0.0	0.0	0.0	0.0	0.0
ENSG00000002822	8379	ensembl_gene_id	H. sapiens	8379	H. sapiens	MAD1L1	mitotic arrest deficient 1 like 1	GO:0007094 mitotic spindle assembly checkpoint;GO:0071174 mitotic spindle checkpoint;GO:0045841 negative regulation of mitotic metaphase/anaphase transition			Nuclear membrane;Nucleoplasm(Supported)		(M195)PID CMYB PATHWAY		0.0	0.0	1.0	0.0	0.0	0.0	0.0	0.0	0.0	0.0	1.0	0.0	0.0	0.0	0.0	0.0	0.0	0.0	0.0	0.0
ENSG00000177283	8325	ensembl_gene_id	H. sapiens	8325	H. sapiens	FZD8	frizzled class receptor 8	GO:0043507 positive regulation of JUN kinase activity;GO:0043506 regulation of JUN kinase activity;GO:0033077 T cell differentiation in thymus		G-protein coupled receptors/{Family fz/smo receptors,GPCRs excl olfactory receptors}	Endoplasmic reticulum(Approved)		(M77)PID WNT SIGNALING PATHWAY; (M5493)WNT SIGNALING	(M5895)HALLMARK WNT BETA CATENIN SIGNALING; (M5930)HALLMARK EPITHELIAL MESENCHYMAL TRANSITION	0.0	0.0	1.0	1.0	0.0	1.0	0.0	0.0	0.0	0.0	0.0	0.0	0.0	0.0	0.0	0.0	0.0	0.0	0.0	0.0
ENSG00000173559	64859	ensembl_gene_id	H. sapiens	64859	H. sapiens	NABP1	nucleic acid binding protein 1	GO:0042795 snRNA transcription by RNA polymerase II;GO:0009301 snRNA transcription;GO:0098781 ncRNA transcription			Nucleoplasm(Supported)Cytosol(Approved)			(M5922)HALLMARK UNFOLDED PROTEIN RESPONSE; (M5905)HALLMARK ADIPOGENESIS	0.0	0.0	0.0	0.0	0.0	0.0	0.0	0.0	0.0	0.0	0.0	0.0	0.0	0.0	0.0	0.0	0.0	0.0	0.0	0.0
ENSG00000186665	284018	ensembl_gene_id	H. sapiens	284018	H. sapiens	C17orf58	chromosome 17 open reading frame 58				Cytosol;Plasma membrane(Approved)		(M3468)NABA ECM REGULATORS; (M5885)NABA MATRISOME ASSOCIATED; (M5889)NABA MATRISOME		0.0	0.0	0.0	0.0	0.0	0.0	0.0	0.0	0.0	0.0	0.0	0.0	0.0	0.0	1.0	0.0	0.0	0.0	0.0	0.0
ENSG00000198369	200734	ensembl_gene_id	H. sapiens	200734	H. sapiens	SPRED2	sprouty related EVH1 domain containing 2	GO:0000188 inactivation of MAPK activity;GO:0043517 positive regulation of DNA damage response, signal transduction by p53 class mediator;GO:0010801 negative regulation of peptidyl-threonine phosphorylation			Cytosol(Supported)Nucleoplasm(Uncertain)		(M231)PID KIT PATHWAY	(M5947)HALLMARK IL2 STAT5 SIGNALING	0.0	0.0	0.0	1.0	0.0	0.0	0.0	0.0	1.0	0.0	0.0	1.0	0.0	1.0	0.0	0.0	0.0	0.0	0.0	0.0
ENSG00000090530	55214	ensembl_gene_id	H. sapiens	55214	H. sapiens	P3H2	prolyl 3-hydroxylase 2	GO:0019511 peptidyl-proline hydroxylation;GO:0018126 protein hydroxylation;GO:0018208 peptidyl-proline modification		Enzymes/ENZYME proteins/Oxidoreductases		Vitamin C (Procollagen-proline 3-dioxygenase activity);Succinic acid (Procollagen-proline 3-dioxygenase activity);L-Proline (Procollagen-proline 3-dioxygenase activity)	(M3468)NABA ECM REGULATORS; (M5885)NABA MATRISOME ASSOCIATED; (M5889)NABA MATRISOME		0.0	0.0	0.0	0.0	0.0	0.0	0.0	1.0	0.0	0.0	1.0	0.0	0.0	0.0	1.0	0.0	0.0	0.0	0.0	0.0
ENSG00000196526	60312	ensembl_gene_id	H. sapiens	60312	H. sapiens	AFAP1	actin filament associated protein 1	GO:0051493 regulation of cytoskeleton organization;GO:0033043 regulation of organelle organization;GO:0007010 cytoskeleton organization			Actin filaments(Supported)Cytosol;Focal adhesion sites(Approved)				0.0	0.0	0.0	0.0	0.0	0.0	0.0	0.0	0.0	0.0	0.0	0.0	0.0	0.0	0.0	0.0	0.0	0.0	0.0	0.0
ENSG00000121653	9479	ensembl_gene_id	H. sapiens	9479	H. sapiens	MAPK8IP1	mitogen-activated protein kinase 8 interacting protein 1	GO:2000564 regulation of CD8-positive, alpha-beta T cell proliferation;GO:0043508 negative regulation of JUN kinase activity;GO:0035740 CD8-positive, alpha-beta T cell proliferation			Plasma membrane(Enhanced)	2,6-Dihydroanthra/1,9-Cd/Pyrazol-6-One (Protein kinase inhibitor activity);6-CHLORO-9-HYDROXY-1,3-DIMETHYL-1,9-DIHYDRO-4H-PYRAZOLO[3,4-B]QUINOLIN-4-ONE (Protein kinase inhibitor activity);N-(4-AMINO-5-CYANO-6-ETHOXYPYRIDIN-2-YL)-2-(4-BROMO-2,5-DIMETHOXYPHENYL)ACETAMIDE (Protein kinase inhibitor activity);5-CYANO-N-(2,5-DIMETHOXYBENZYL)-6-ETHOXYPYRIDINE-2-CARBOXAMIDE (Protein kinase inhibitor acti…	(M7871)ST GRANULE CELL SURVIVAL PATHWAY; (M69)PID REELIN PATHWAY; (M12705)SIG CD40PATHWAYMAP		0.0	0.0	1.0	1.0	0.0	0.0	0.0	0.0	0.0	0.0	0.0	0.0	0.0	1.0	0.0	0.0	0.0	0.0	0.0	0.0
ENSG00000104312	8767	ensembl_gene_id	H. sapiens	8767	H. sapiens	RIPK2	receptor interacting serine/threonine kinase 2	GO:0045627 positive regulation of T-helper 1 cell differentiation;GO:0045625 regulation of T-helper 1 cell differentiation;GO:0045624 positive regulation of T-helper cell differentiation	TKL Ser/Thr protein kinase family	Enzymes/{ENZYME proteins/Transferases,Kinases/TKL Ser/Thr protein kinases}	Cytosol(Enhanced)		(M37)PID NFKAPPAB CANONICAL PATHWAY; (M54)PID IL12 2PATHWAY; (M153)PID P75 NTR PATHWAY	(M5911)HALLMARK INTERFERON ALPHA RESPONSE; (M5932)HALLMARK INFLAMMATORY RESPONSE; (M5913)HALLMARK INTERFERON GAMMA RESPONSE	0.0	0.0	1.0	1.0	0.0	0.0	0.0	0.0	0.0	0.0	0.0	0.0	0.0	0.0	0.0	1.0	0.0	0.0	0.0	0.0
ENSG00000004776	126393	ensembl_gene_id	H. sapiens	126393	H. sapiens	HSPB6	heat shock protein family B (small) member 6	GO:0010667 negative regulation of cardiac muscle cell apoptotic process;GO:0010664 negative regulation of striated muscle cell apoptotic process;GO:0010665 regulation of cardiac muscle cell apoptotic process							0.0	0.0	0.0	0.0	0.0	1.0	0.0	0.0	0.0	0.0	0.0	0.0	0.0	0.0	0.0	0.0	0.0	0.0	0.0	0.0
ENSG00000151414	140609	ensembl_gene_id	H. sapiens	140609	H. sapiens	NEK7	NIMA related kinase 7	GO:0032212 positive regulation of telomere maintenance via telomerase;GO:1904355 positive regulation of telomere capping;GO:1904358 positive regulation of telomere maintenance via telomere lengthening	NEK Ser/Thr protein kinase family	Enzymes/{ENZYME proteins/Transferases,Kinases/NEK Ser/Thr protein kinases};Transporters/Transporter channels and pores	Nucleoplasm(Supported)			(M5942)HALLMARK UV RESPONSE DN; (M5945)HALLMARK HEME METABOLISM	0.0	0.0	0.0	1.0	0.0	0.0	0.0	0.0	0.0	0.0	0.0	0.0	0.0	0.0	0.0	0.0	0.0	0.0	0.0	0.0
ENSG00000136114	55901	ensembl_gene_id	H. sapiens	55901	H. sapiens	THSD1	thrombospondin type 1 domain containing 1				Cytosol(Enhanced)				0.0	0.0	0.0	0.0	0.0	0.0	0.0	0.0	0.0	0.0	0.0	0.0	0.0	0.0	0.0	0.0	0.0	0.0	0.0	0.0
ENSG00000145779	25816	ensembl_gene_id	H. sapiens	25816	H. sapiens	TNFAIP8	TNF alpha induced protein 8	GO:0043154 negative regulation of cysteine-type endopeptidase activity involved in apoptotic process;GO:2000117 negative regulation of cysteine-type endopeptidase activity;GO:0043281 regulation of cysteine-type endopeptidase activity involved in apoptotic process			Nucleoplasm(Approved)			(M5908)HALLMARK ANDROGEN RESPONSE; (M5890)HALLMARK TNFA SIGNALING VIA NFKB	0.0	0.0	0.0	0.0	0.0	0.0	0.0	0.0	0.0	0.0	0.0	0.0	0.0	0.0	0.0	1.0	0.0	0.0	0.0	0.0
ENSG00000198855	11153	ensembl_gene_id	H. sapiens	11153	H. sapiens	FICD	FIC domain protein adenylyltransferase	GO:0044602 protein deadenylylation;GO:1903894 regulation of IRE1-mediated unfolded protein response;GO:0044601 protein denucleotidylation		Enzymes/ENZYME proteins/Transferases	Nucleus(Approved)				0.0	0.0	0.0	0.0	0.0	0.0	0.0	0.0	0.0	0.0	0.0	0.0	0.0	0.0	0.0	0.0	0.0	0.0	0.0	0.0
ENSG00000158859	9507	ensembl_gene_id	H. sapiens	9507	H. sapiens	ADAMTS4	ADAM metallopeptidase with thrombospondin type 1 motif 4	GO:0022617 extracellular matrix disassembly;GO:0030198 extracellular matrix organization;GO:0043062 extracellular structure organization		Enzymes/ENZYME proteins/Hydrolases	Nuclear speckles(Approved)		(M3468)NABA ECM REGULATORS; (M5885)NABA MATRISOME ASSOCIATED; (M5889)NABA MATRISOME		0.0	0.0	0.0	0.0	0.0	0.0	0.0	1.0	0.0	0.0	0.0	0.0	1.0	0.0	1.0	0.0	0.0	0.0	0.0	0.0
ENSG00000173546	1464	ensembl_gene_id	H. sapiens	1464	H. sapiens	CSPG4	chondroitin sulfate proteoglycan 4	GO:0030208 dermatan sulfate biosynthetic process;GO:0030207 chondroitin sulfate catabolic process;GO:0030205 dermatan sulfate metabolic process			Nucleus;Plasma membrane(Approved)		(M18)PID INTEGRIN1 PATHWAY; (M5880)NABA ECM AFFILIATED; (M5885)NABA MATRISOME ASSOCIATED		0.0	0.0	0.0	1.0	0.0	1.0	0.0	0.0	0.0	0.0	0.0	1.0	0.0	0.0	1.0	0.0	0.0	0.0	0.0	0.0
ENSG00000164066	27152	ensembl_gene_id	H. sapiens	27152	H. sapiens	INTU	inturned planar cell polarity protein	GO:0010839 negative regulation of keratinocyte proliferation;GO:0031069 hair follicle morphogenesis;GO:0021513 spinal cord dorsal/ventral patterning			Vesicles(Approved)				0.0	1.0	0.0	0.0	1.0	0.0	0.0	0.0	0.0	0.0	1.0	0.0	0.0	0.0	0.0	0.0	1.0	0.0	0.0	0.0
ENSG00000143341	83872	ensembl_gene_id	H. sapiens	83872	H. sapiens	HMCN1	hemicentin 1	GO:0007157 heterophilic cell-cell adhesion via plasma membrane cell adhesion molecules;GO:0007156 homophilic cell adhesion via plasma membrane adhesion molecules;GO:0007601 visual perception					(M5887)NABA BASEMENT MEMBRANES; (M3008)NABA ECM GLYCOPROTEINS; (M5884)NABA CORE MATRISOME		0.0	0.0	0.0	0.0	0.0	0.0	0.0	1.0	0.0	0.0	0.0	0.0	0.0	0.0	0.0	0.0	0.0	0.0	0.0	0.0
ENSG00000164674	94120	ensembl_gene_id	H. sapiens	94120	H. sapiens	SYTL3	synaptotagmin like 3	GO:0006887 exocytosis;GO:0006886 intracellular protein transport;GO:0032940 secretion by cell			Nucleoli fibrillar center;Vesicles(Approved)				0.0	0.0	0.0	0.0	0.0	0.0	0.0	0.0	0.0	0.0	0.0	0.0	0.0	0.0	0.0	0.0	0.0	0.0	0.0	0.0
ENSG00000158301	114928	ensembl_gene_id	H. sapiens	114928	H. sapiens	GPRASP2	G protein-coupled receptor associated sorting protein 2				Cytosol;Nucleoplasm(Approved)				0.0	0.0	0.0	0.0	0.0	0.0	0.0	0.0	0.0	0.0	0.0	0.0	0.0	0.0	0.0	0.0	0.0	0.0	0.0	0.0
ENSG00000134769	1837	ensembl_gene_id	H. sapiens	1837	H. sapiens	DTNA	dystrobrevin alpha	GO:0007274 neuromuscular synaptic transmission;GO:0006941 striated muscle contraction;GO:0006936 muscle contraction			Cell Junctions(Supported)Intermediate filaments(Approved)Nucleoplasm(Uncertain)			(M5909)HALLMARK MYOGENESIS; (M5891)HALLMARK HYPOXIA	0.0	0.0	0.0	0.0	0.0	0.0	0.0	0.0	0.0	0.0	0.0	0.0	0.0	0.0	0.0	0.0	0.0	0.0	0.0	0.0
ENSG00000101871	4281	ensembl_gene_id	H. sapiens	4281	H. sapiens	MID1	midline 1	GO:0007026 negative regulation of microtubule depolymerization;GO:0035372 protein localization to microtubule;GO:0031114 regulation of microtubule depolymerization		Enzymes/ENZYME proteins/Transferases				(M5893)HALLMARK MITOTIC SPINDLE	0.0	0.0	0.0	1.0	0.0	0.0	0.0	0.0	0.0	0.0	0.0	0.0	0.0	0.0	0.0	0.0	0.0	0.0	0.0	0.0
ENSG00000146540	84310	ensembl_gene_id	H. sapiens	84310	H. sapiens	C7orf50	chromosome 7 open reading frame 50				Nucleoli;Nucleus(Approved)				0.0	0.0	0.0	0.0	0.0	0.0	0.0	0.0	0.0	0.0	0.0	0.0	0.0	0.0	0.0	0.0	0.0	0.0	0.0	0.0
ENSG00000134242	26191	ensembl_gene_id	H. sapiens	26191	H. sapiens	PTPN22	protein tyrosine phosphatase non-receptor type 22	GO:0070433 negative regulation of nucleotide-binding oligomerization domain containing 2 signaling pathway;GO:0070425 negative regulation of nucleotide-binding oligomerization domain containing signaling pathway;GO:0034157 positive regulation of toll-like receptor 7 signaling pathway		Enzymes/ENZYME proteins/Hydrolases	Plasma membrane(Approved)Nucleoplasm;Vesicles(Uncertain)				0.0	0.0	1.0	1.0	0.0	0.0	0.0	0.0	0.0	0.0	0.0	0.0	0.0	1.0	0.0	0.0	0.0	0.0	0.0	0.0
ENSG00000135318	4907	ensembl_gene_id	H. sapiens	4907	H. sapiens	NT5E	5'-nucleotidase ecto	GO:0006196 AMP catabolic process;GO:0046086 adenosine biosynthetic process;GO:0009169 purine ribonucleoside monophosphate catabolic process		CD markers;Enzymes/ENZYME proteins/Hydrolases	Plasma membrane(Supported)Cytosol;Nucleoplasm(Approved)	Pentoxifylline (Nucleotide binding)	(M255)PID HIF1 TFPATHWAY	(M5947)HALLMARK IL2 STAT5 SIGNALING; (M5937)HALLMARK GLYCOLYSIS; (M5930)HALLMARK EPITHELIAL MESENCHYMAL TRANSITION	0.0	0.0	1.0	0.0	0.0	0.0	0.0	0.0	0.0	1.0	0.0	0.0	0.0	0.0	0.0	0.0	0.0	0.0	0.0	0.0
ENSG00000138944	85352	ensembl_gene_id	H. sapiens	85352	H. sapiens	SHISAL1	shisa like 1				Cytosol;Vesicles(Approved)				0.0	0.0	0.0	0.0	0.0	0.0	0.0	0.0	0.0	0.0	0.0	0.0	0.0	0.0	0.0	0.0	0.0	0.0	0.0	0.0
ENSG00000176225	25914	ensembl_gene_id	H. sapiens	25914	H. sapiens	RTTN	rotatin	GO:0032053 ciliary basal body organization;GO:0010457 centriole-centriole cohesion;GO:0007099 centriole replication							0.0	0.0	0.0	0.0	0.0	0.0	0.0	0.0	0.0	0.0	0.0	0.0	0.0	0.0	0.0	0.0	0.0	0.0	0.0	0.0
ENSG00000120885	1191	ensembl_gene_id	H. sapiens	1191	H. sapiens	CLU	clusterin	GO:1905892 negative regulation of cellular response to thapsigargin;GO:1905895 negative regulation of cellular response to tunicamycin;GO:0061740 protein targeting to lysosome involved in chaperone-mediated autophagy					(M254)PID MYC REPRESS PATHWAY	(M5892)HALLMARK CHOLESTEROL HOMEOSTASIS; (M5946)HALLMARK COAGULATION; (M5902)HALLMARK APOPTOSIS	0.0	0.0	1.0	1.0	0.0	0.0	0.0	0.0	0.0	1.0	0.0	0.0	0.0	1.0	0.0	1.0	0.0	0.0	0.0	0.0
ENSG00000164484	114801	ensembl_gene_id	H. sapiens	114801	H. sapiens	TMEM200A	transmembrane protein 200A								0.0	0.0	0.0	0.0	0.0	0.0	0.0	0.0	0.0	0.0	0.0	0.0	0.0	0.0	0.0	0.0	0.0	0.0	0.0	0.0
ENSG00000116584	9181	ensembl_gene_id	H. sapiens	9181	H. sapiens	ARHGEF2	Rho/Rac guanine nucleotide exchange factor 2	GO:0071802 negative regulation of podosome assembly;GO:1902219 negative regulation of intrinsic apoptotic signaling pathway in response to osmotic stress;GO:1902218 regulation of intrinsic apoptotic signaling pathway in response to osmotic stress					(M69)PID REELIN PATHWAY; (M241)PID RAC1 REG PATHWAY; (M68)PID RHOA REG PATHWAY	(M5893)HALLMARK MITOTIC SPINDLE	1.0	0.0	0.0	0.0	0.0	0.0	1.0	0.0	0.0	0.0	0.0	0.0	0.0	1.0	0.0	1.0	0.0	0.0	0.0	0.0
ENSG00000173334	10221	ensembl_gene_id	H. sapiens	10221	H. sapiens	TRIB1	tribbles pseudokinase 1	GO:0045645 positive regulation of eosinophil differentiation;GO:0045659 negative regulation of neutrophil differentiation;GO:0045643 regulation of eosinophil differentiation	CAMK Ser/Thr protein kinase family	Enzymes/Kinases/CAMK Ser/Thr protein kinases	Plasma membrane(Approved)			(M5953)HALLMARK KRAS SIGNALING UP; (M5890)HALLMARK TNFA SIGNALING VIA NFKB	0.0	0.0	1.0	1.0	0.0	0.0	1.0	0.0	0.0	1.0	1.0	1.0	0.0	1.0	0.0	0.0	0.0	0.0	0.0	0.0
ENSG00000173611	286205	ensembl_gene_id	H. sapiens	286205	H. sapiens	SCAI	suppressor of cancer cell invasion	GO:0035024 negative regulation of Rho protein signal transduction;GO:0046580 negative regulation of Ras protein signal transduction;GO:0051058 negative regulation of small GTPase mediated signal transduction			Nucleus(Supported)Nuclear membrane(Approved)		(M12)PID RHOA PATHWAY		0.0	0.0	0.0	0.0	0.0	0.0	0.0	0.0	0.0	0.0	0.0	0.0	0.0	1.0	0.0	0.0	0.0	0.0	0.0	0.0
ENSG00000161642	25946	ensembl_gene_id	H. sapiens	25946	H. sapiens	ZNF385A	zinc finger protein 385A	GO:1902164 positive regulation of DNA damage response, signal transduction by p53 class mediator resulting in transcription of p21 class mediator;GO:0006977 DNA damage response, signal transduction by p53 class mediator resulting in cell cycle arrest;GO:0072431 signal transduction involved in mitotic G1 DNA damage checkpoint			Cytosol(Supported)Nucleus(Approved)		(M145)PID P53 DOWNSTREAM PATHWAY		0.0	0.0	0.0	0.0	0.0	0.0	1.0	0.0	0.0	1.0	0.0	0.0	1.0	1.0	0.0	0.0	0.0	0.0	0.0	0.0
ENSG00000171533	4135	ensembl_gene_id	H. sapiens	4135	H. sapiens	MAP6	microtubule associated protein 6	GO:0050772 positive regulation of axonogenesis;GO:0050770 regulation of axonogenesis;GO:0048813 dendrite morphogenesis			Plasma membrane(Uncertain)			(M5947)HALLMARK IL2 STAT5 SIGNALING	0.0	0.0	0.0	0.0	0.0	0.0	1.0	0.0	0.0	0.0	0.0	0.0	0.0	0.0	0.0	0.0	0.0	0.0	0.0	0.0
ENSG00000082212	4200	ensembl_gene_id	H. sapiens	4200	H. sapiens	ME2	malic enzyme 2	GO:1902031 regulation of NADP metabolic process;GO:0006108 malate metabolic process;GO:0006739 NADP metabolic process		Enzymes/ENZYME proteins/Oxidoreductases	Mitochondria(Enhanced)	NADH (Oxaloacetate decarboxylase activity);Fumarate (Oxaloacetate decarboxylase activity);Malate Ion (Oxaloacetate decarboxylase activity);Alpha-Ketomalonic Acid (Oxaloacetate decarboxylase activity);Tartronate (Oxaloacetate decarboxylase activity)		(M5937)HALLMARK GLYCOLYSIS	0.0	0.0	0.0	0.0	0.0	0.0	0.0	0.0	0.0	0.0	0.0	0.0	0.0	0.0	0.0	0.0	0.0	0.0	0.0	0.0
ENSG00000159176	1465	ensembl_gene_id	H. sapiens	1465	H. sapiens	CSRP1	cysteine and glycine rich protein 1	GO:0070527 platelet aggregation;GO:0045214 sarcomere organization;GO:0030239 myofibril assembly						(M5946)HALLMARK COAGULATION; (M5921)HALLMARK COMPLEMENT	0.0	0.0	0.0	0.0	0.0	0.0	0.0	0.0	0.0	1.0	0.0	0.0	0.0	0.0	0.0	0.0	0.0	1.0	0.0	0.0
ENSG00000171448	57684	ensembl_gene_id	H. sapiens	57684	H. sapiens	ZBTB26	zinc finger and BTB domain containing 26	GO:0000122 negative regulation of transcription by RNA polymerase II;GO:0045892 negative regulation of transcription, DNA-templated;GO:1903507 negative regulation of nucleic acid-templated transcription		Transcription factors/Zinc-coordinating DNA-binding domains					0.0	0.0	0.0	0.0	0.0	0.0	0.0	0.0	0.0	0.0	0.0	0.0	0.0	0.0	0.0	0.0	0.0	0.0	0.0	0.0
ENSG00000243156	57553	ensembl_gene_id	H. sapiens	57553	H. sapiens	MICAL3	microtubule associated monooxygenase, calponin and LIM domain containing 3	GO:0030042 actin filament depolymerization;GO:0051261 protein depolymerization;GO:0008154 actin polymerization or depolymerization		Enzymes/ENZYME proteins/Oxidoreductases	Nucleoplasm(Enhanced)Cytosol;Plasma membrane(Uncertain)				0.0	0.0	0.0	0.0	0.0	0.0	0.0	0.0	0.0	0.0	0.0	0.0	0.0	0.0	0.0	0.0	0.0	0.0	0.0	0.0
ENSG00000144681	6769	ensembl_gene_id	H. sapiens	6769	H. sapiens	STAC	SH3 and cysteine rich domain	GO:1901387 positive regulation of voltage-gated calcium channel activity;GO:1901021 positive regulation of calcium ion transmembrane transporter activity;GO:1901385 regulation of voltage-gated calcium channel activity		Transporters/Accessory Factors Involved in Transport	Nucleoplasm;Plasma membrane(Uncertain)				0.0	0.0	0.0	0.0	0.0	0.0	0.0	0.0	0.0	0.0	0.0	0.0	0.0	0.0	0.0	0.0	0.0	0.0	0.0	0.0
ENSG00000099377	80270	ensembl_gene_id	H. sapiens	80270	H. sapiens	HSD3B7	hydroxy-delta-5-steroid dehydrogenase, 3 beta- and steroid delta-isomerase 7	GO:0035754 B cell chemotaxis;GO:0006699 bile acid biosynthetic process;GO:0048247 lymphocyte chemotaxis		Enzymes/ENZYME proteins/Oxidoreductases	Lipid droplets(Supported)			(M5949)HALLMARK PEROXISOME; (M5948)HALLMARK BILE ACID METABOLISM	0.0	0.0	0.0	0.0	0.0	0.0	1.0	0.0	0.0	0.0	0.0	0.0	0.0	0.0	0.0	0.0	0.0	0.0	0.0	0.0
ENSG00000143702	9859	ensembl_gene_id	H. sapiens	9859	H. sapiens	CEP170	centrosomal protein 170				Centrosome(Enhanced)Cytosol(Approved)Plasma membrane(Uncertain)				0.0	0.0	0.0	0.0	0.0	0.0	0.0	0.0	0.0	0.0	0.0	0.0	0.0	0.0	0.0	0.0	0.0	0.0	0.0	0.0
ENSG00000069431	10060	ensembl_gene_id	H. sapiens	10060	H. sapiens	ABCC9	ATP binding cassette subfamily C member 9	GO:1903779 regulation of cardiac conduction;GO:1990573 potassium ion import across plasma membrane;GO:0010107 potassium ion import		Transporters/Primary Active Transporters	Cytosol;Nucleoplasm(Approved)	Adenosine triphosphate (Transporter activity);Glyburide (Transporter activity)			0.0	0.0	0.0	0.0	0.0	0.0	0.0	0.0	0.0	0.0	0.0	0.0	0.0	0.0	0.0	0.0	0.0	0.0	0.0	0.0
ENSG00000166289	79156	ensembl_gene_id	H. sapiens	79156	H. sapiens	PLEKHF1	pleckstrin homology and FYVE domain containing 1	GO:2001244 positive regulation of intrinsic apoptotic signaling pathway;GO:2001235 positive regulation of apoptotic signaling pathway;GO:2001242 regulation of intrinsic apoptotic signaling pathway							0.0	0.0	0.0	0.0	0.0	0.0	0.0	0.0	0.0	0.0	0.0	0.0	0.0	0.0	0.0	1.0	0.0	0.0	0.0	0.0
ENSG00000124145	6385	ensembl_gene_id	H. sapiens	6385	H. sapiens	SDC4	syndecan 4	GO:1903553 positive regulation of extracellular exosome assembly;GO:1903551 regulation of extracellular exosome assembly;GO:0051894 positive regulation of focal adhesion assembly		Transporters	Golgi apparatus;Plasma membrane(Approved)		(M165)PID SYNDECAN 4 PATHWAY; (M53)PID INTEGRIN3 PATHWAY; (M5880)NABA ECM AFFILIATED	(M5891)HALLMARK HYPOXIA; (M5890)HALLMARK TNFA SIGNALING VIA NFKB; (M5930)HALLMARK EPITHELIAL MESENCHYMAL TRANSITION	0.0	1.0	1.0	1.0	0.0	1.0	0.0	1.0	0.0	1.0	1.0	0.0	0.0	0.0	1.0	0.0	0.0	0.0	0.0	0.0
ENSG00000178852	124989	ensembl_gene_id	H. sapiens	124989	H. sapiens	EFCAB13	EF-hand calcium binding domain 13				Cytosol;Nucleus(Supported)Nuclear speckles(Approved)				0.0	0.0	0.0	0.0	0.0	0.0	0.0	0.0	0.0	0.0	0.0	0.0	0.0	0.0	0.0	0.0	0.0	0.0	0.0	0.0
ENSG00000189337	23254	ensembl_gene_id	H. sapiens	23254	H. sapiens	KAZN	kazrin, periplakin interacting protein	GO:0070268 cornification;GO:0031424 keratinization;GO:0030216 keratinocyte differentiation			Cytosol;Nuclear speckles;Nucleoplasm(Supported)			(M5906)HALLMARK ESTROGEN RESPONSE EARLY	0.0	0.0	0.0	0.0	0.0	0.0	0.0	0.0	0.0	0.0	0.0	0.0	0.0	0.0	0.0	0.0	1.0	0.0	0.0	0.0
ENSG00000171408	27115	ensembl_gene_id	H. sapiens	27115	H. sapiens	PDE7B	phosphodiesterase 7B	GO:0006198 cAMP catabolic process;GO:0009214 cyclic nucleotide catabolic process;GO:0009154 purine ribonucleotide catabolic process		Enzymes/ENZYME proteins/Hydrolases	Nucleoplasm(Approved)	Dyphylline (Metal ion binding);Ketotifen (Metal ion binding)			0.0	0.0	0.0	0.0	0.0	0.0	0.0	0.0	0.0	0.0	0.0	0.0	0.0	0.0	0.0	0.0	0.0	0.0	0.0	0.0
ENSG00000165655	84858	ensembl_gene_id	H. sapiens	84858	H. sapiens	ZNF503	zinc finger protein 503	GO:0070315 G1 to G0 transition involved in cell differentiation;GO:0070314 G1 to G0 transition;GO:0061351 neural precursor cell proliferation			Cytosol;Nucleoplasm;Plasma membrane(Approved)				0.0	0.0	0.0	0.0	0.0	0.0	0.0	0.0	0.0	0.0	1.0	0.0	0.0	0.0	0.0	0.0	0.0	0.0	0.0	0.0
ENSG00000067836	79641	ensembl_gene_id	H. sapiens	79641	H. sapiens	ROGDI	rogdi atypical leucine zipper	GO:0007035 vacuolar acidification;GO:0051452 intracellular pH reduction;GO:0051453 regulation of intracellular pH							0.0	0.0	0.0	0.0	0.0	0.0	0.0	0.0	0.0	0.0	0.0	0.0	0.0	0.0	0.0	0.0	0.0	0.0	0.0	0.0
ENSG00000079308	7145	ensembl_gene_id	H. sapiens	7145	H. sapiens	TNS1	tensin 1	GO:0010761 fibroblast migration;GO:0007044 cell-substrate junction assembly;GO:0034329 cell junction assembly			Focal adhesion sites(Enhanced)		(M71)PID ILK PATHWAY	(M5945)HALLMARK HEME METABOLISM	0.0	0.0	0.0	0.0	0.0	1.0	0.0	0.0	0.0	0.0	0.0	0.0	0.0	0.0	0.0	0.0	0.0	0.0	0.0	0.0
ENSG00000254726	92312	ensembl_gene_id	H. sapiens	92312	H. sapiens	MEX3A	mex-3 RNA binding family member A				Cytosol(Supported)				0.0	0.0	0.0	0.0	0.0	0.0	0.0	0.0	0.0	0.0	0.0	0.0	0.0	0.0	0.0	0.0	0.0	0.0	0.0	0.0
ENSG00000033867	9497	ensembl_gene_id	H. sapiens	9497	H. sapiens	SLC4A7	solute carrier family 4 member 7	GO:0060117 auditory receptor cell development;GO:0042491 inner ear auditory receptor cell differentiation;GO:0060119 inner ear receptor cell development		Transporters/Electrochemical Potential-driven transporters	Focal adhesion sites;Plasma membrane(Supported)Cytosol(Approved)				0.0	0.0	0.0	0.0	0.0	0.0	0.0	0.0	0.0	0.0	0.0	0.0	0.0	0.0	0.0	0.0	1.0	0.0	0.0	0.0
ENSG00000059804	6515	ensembl_gene_id	H. sapiens	6515	H. sapiens	SLC2A3	solute carrier family 2 member 3	GO:0019852 L-ascorbic acid metabolic process;GO:0043312 neutrophil degranulation;GO:1904659 glucose transmembrane transport		Transporters/Electrochemical Potential-driven transporters	Plasma membrane(Approved)			(M5947)HALLMARK IL2 STAT5 SIGNALING; (M5891)HALLMARK HYPOXIA; (M5924)HALLMARK MTORC1 SIGNALING	0.0	0.0	0.0	0.0	0.0	0.0	0.0	0.0	0.0	0.0	0.0	0.0	0.0	0.0	0.0	0.0	0.0	0.0	0.0	0.0
ENSG00000154678	5137	ensembl_gene_id	H. sapiens	5137	H. sapiens	PDE1C	phosphodiesterase 1C	GO:0007165 signal transduction;GO:0023052 signaling;GO:0007154 cell communication		Enzymes/ENZYME proteins/Hydrolases	Nucleus(Approved)				0.0	0.0	0.0	0.0	0.0	0.0	0.0	0.0	0.0	0.0	0.0	0.0	0.0	0.0	0.0	0.0	0.0	0.0	0.0	0.0
ENSG00000155970	286097	ensembl_gene_id	H. sapiens	286097	H. sapiens	MICU3	mitochondrial calcium uptake family member 3	GO:0006851 mitochondrial calcium ion transmembrane transport;GO:0070588 calcium ion transmembrane transport;GO:0006816 calcium ion transport							0.0	0.0	0.0	0.0	0.0	0.0	0.0	0.0	0.0	0.0	0.0	0.0	0.0	0.0	0.0	0.0	0.0	0.0	0.0	0.0
ENSG00000135424	3679	ensembl_gene_id	H. sapiens	3679	H. sapiens	ITGA7	integrin subunit alpha 7	GO:0035987 endodermal cell differentiation;GO:0001706 endoderm formation;GO:0034113 heterotypic cell-cell adhesion			Cytosol;Plasma membrane(Approved)		(M47)PID INTEGRIN CS PATHWAY; (M67)PID ARF6 TRAFFICKING PATHWAY; (M18)PID INTEGRIN1 PATHWAY	(M5905)HALLMARK ADIPOGENESIS; (M5909)HALLMARK MYOGENESIS	0.0	0.0	0.0	0.0	0.0	0.0	0.0	1.0	0.0	0.0	0.0	0.0	0.0	0.0	0.0	0.0	0.0	1.0	0.0	0.0
ENSG00000100228	9609	ensembl_gene_id	H. sapiens	9609	H. sapiens	RAB36	RAB36, member RAS oncogene family	GO:0032482 Rab protein signal transduction;GO:0007265 Ras protein signal transduction;GO:0007264 small GTPase mediated signal transduction			Vesicles(Approved)				0.0	0.0	0.0	0.0	0.0	0.0	0.0	0.0	0.0	0.0	0.0	0.0	0.0	0.0	0.0	0.0	0.0	0.0	0.0	0.0
ENSG00000108001	253738	ensembl_gene_id	H. sapiens	253738	H. sapiens	EBF3	EBF transcription factor 3	GO:0045944 positive regulation of transcription by RNA polymerase II;GO:0045893 positive regulation of transcription, DNA-templated;GO:1903508 positive regulation of nucleic acid-templated transcription		Transcription factors/Immunoglobulin fold	Nucleoplasm;Vesicles(Approved)				0.0	0.0	0.0	0.0	0.0	0.0	0.0	0.0	0.0	0.0	0.0	0.0	0.0	0.0	0.0	0.0	0.0	0.0	0.0	0.0
ENSG00000145555	4651	ensembl_gene_id	H. sapiens	4651	H. sapiens	MYO10	myosin X	GO:0038096 Fc-gamma receptor signaling pathway involved in phagocytosis;GO:0002431 Fc receptor mediated stimulatory signaling pathway;GO:0038094 Fc-gamma receptor signaling pathway			Cytosol;Plasma membrane(Supported)Nucleoli(Approved)		(M108)PID NETRIN PATHWAY		0.0	0.0	1.0	0.0	0.0	0.0	1.0	0.0	0.0	0.0	0.0	0.0	0.0	0.0	0.0	0.0	0.0	0.0	0.0	0.0
ENSG00000170677	9306	ensembl_gene_id	H. sapiens	9306	H. sapiens	SOCS6	suppressor of cytokine signaling 6	GO:0043551 regulation of phosphatidylinositol 3-kinase activity;GO:0050868 negative regulation of T cell activation;GO:0046854 phosphatidylinositol phosphorylation			Cytosol;Nuclear speckles(Approved)				0.0	0.0	1.0	0.0	0.0	0.0	0.0	0.0	0.0	0.0	0.0	1.0	0.0	0.0	0.0	0.0	0.0	0.0	0.0	0.0
ENSG00000127863	55504	ensembl_gene_id	H. sapiens	55504	H. sapiens	TNFRSF19	TNF receptor superfamily member 19	GO:0046330 positive regulation of JNK cascade;GO:0032874 positive regulation of stress-activated MAPK cascade;GO:0001942 hair follicle development			Mitochondria;Nucleoplasm(Approved)				0.0	0.0	0.0	1.0	0.0	0.0	0.0	0.0	0.0	0.0	0.0	0.0	0.0	0.0	0.0	0.0	1.0	0.0	0.0	0.0
ENSG00000006534	221	ensembl_gene_id	H. sapiens	221	H. sapiens	ALDH3B1	aldehyde dehydrogenase 3 family member B1	GO:0006068 ethanol catabolic process;GO:0034310 primary alcohol catabolic process;GO:0006067 ethanol metabolic process		Enzymes/ENZYME proteins/Oxidoreductases		NADH (Aldehyde dehydrogenase [nad(p)+] activity)		(M5906)HALLMARK ESTROGEN RESPONSE EARLY; (M5907)HALLMARK ESTROGEN RESPONSE LATE	0.0	0.0	0.0	0.0	0.0	0.0	0.0	0.0	0.0	0.0	0.0	0.0	0.0	0.0	0.0	0.0	0.0	0.0	0.0	0.0
ENSG00000146021	26249	ensembl_gene_id	H. sapiens	26249	H. sapiens	KLHL3	kelch like family member 3	GO:0072156 distal tubule morphogenesis;GO:0072017 distal tubule development;GO:0070294 renal sodium ion absorption							0.0	1.0	0.0	0.0	0.0	0.0	0.0	0.0	0.0	0.0	0.0	0.0	0.0	0.0	0.0	0.0	0.0	0.0	0.0	0.0
ENSG00000171150	9655	ensembl_gene_id	H. sapiens	9655	H. sapiens	SOCS5	suppressor of cytokine signaling 5	GO:0045629 negative regulation of T-helper 2 cell differentiation;GO:0045627 positive regulation of T-helper 1 cell differentiation;GO:0045625 regulation of T-helper 1 cell differentiation			Cytosol;Nucleoplasm;Plasma membrane(Approved)		(M28)PID IL4 2PATHWAY	(M5950)HALLMARK ALLOGRAFT REJECTION	0.0	0.0	1.0	0.0	0.0	0.0	0.0	0.0	0.0	1.0	0.0	1.0	0.0	1.0	0.0	0.0	0.0	0.0	0.0	0.0
ENSG00000076513	88455	ensembl_gene_id	H. sapiens	88455	H. sapiens	ANKRD13A	ankyrin repeat domain 13A	GO:1905667 negative regulation of protein localization to endosome;GO:0002091 negative regulation of receptor internalization;GO:1905666 regulation of protein localization to endosome			Plasma membrane(Supported)				0.0	0.0	0.0	0.0	0.0	0.0	0.0	0.0	0.0	0.0	0.0	0.0	0.0	0.0	0.0	0.0	0.0	0.0	0.0	0.0
ENSG00000164761	4982	ensembl_gene_id	H. sapiens	4982	H. sapiens	TNFRSF11B	TNF receptor superfamily member 11b	GO:0042489 negative regulation of odontogenesis of dentin-containing tooth;GO:0042483 negative regulation of odontogenesis;GO:0045779 negative regulation of bone resorption						(M5915)HALLMARK APICAL JUNCTION; (M5930)HALLMARK EPITHELIAL MESENCHYMAL TRANSITION	0.0	1.0	0.0	0.0	0.0	0.0	0.0	1.0	0.0	0.0	0.0	0.0	1.0	0.0	0.0	0.0	0.0	0.0	0.0	0.0
ENSG00000157833	150946	ensembl_gene_id	H. sapiens	150946	H. sapiens	GAREM2	GRB2 associated regulator of MAPK1 subtype 2				Cytosol(Approved)				0.0	0.0	0.0	0.0	0.0	0.0	0.0	0.0	0.0	0.0	0.0	0.0	0.0	0.0	0.0	0.0	0.0	0.0	0.0	0.0
ENSG00000070669	440	ensembl_gene_id	H. sapiens	440	H. sapiens	ASNS	asparagine synthetase (glutamine-hydrolyzing)	GO:0070981 L-asparagine biosynthetic process;GO:0070982 L-asparagine metabolic process;GO:0006529 asparagine biosynthetic process		Enzymes/ENZYME proteins/Ligase	Cytosol(Enhanced)	L-Aspartic Acid (Protein homodimerization activity);L-Glutamic Acid (Protein homodimerization activity);Adenosine triphosphate (Protein homodimerization activity);L-Asparagine (Protein homodimerization activity)		(M5922)HALLMARK UNFOLDED PROTEIN RESPONSE; (M5941)HALLMARK UV RESPONSE UP; (M5924)HALLMARK MTORC1 SIGNALING	0.0	0.0	0.0	0.0	0.0	0.0	0.0	0.0	0.0	0.0	0.0	0.0	0.0	0.0	0.0	0.0	0.0	0.0	0.0	0.0
ENSG00000154122	56172	ensembl_gene_id	H. sapiens	56172	H. sapiens	ANKH	ANKH inorganic pyrophosphate transport regulator	GO:0030505 inorganic diphosphate transport;GO:0035435 phosphate ion transmembrane transport;GO:0006817 phosphate ion transport		Transporters/Electrochemical Potential-driven transporters	Cytosol(Approved)			(M5908)HALLMARK ANDROGEN RESPONSE; (M5902)HALLMARK APOPTOSIS; (M5953)HALLMARK KRAS SIGNALING UP	0.0	0.0	0.0	0.0	1.0	0.0	0.0	0.0	0.0	0.0	0.0	0.0	1.0	0.0	0.0	0.0	0.0	0.0	0.0	0.0
ENSG00000185070	23768	ensembl_gene_id	H. sapiens	23768	H. sapiens	FLRT2	fibronectin leucine rich transmembrane protein 2	GO:0061343 cell adhesion involved in heart morphogenesis;GO:2001222 regulation of neuron migration;GO:0071711 basement membrane organization							0.0	0.0	0.0	0.0	0.0	0.0	1.0	1.0	1.0	0.0	0.0	1.0	0.0	0.0	0.0	0.0	0.0	0.0	0.0	0.0
ENSG00000120341	89866	ensembl_gene_id	H. sapiens	89866	H. sapiens	SEC16B	SEC16 homolog B, endoplasmic reticulum export factor	GO:0070863 positive regulation of protein exit from endoplasmic reticulum;GO:0048208 COPII vesicle coating;GO:0048207 vesicle targeting, rough ER to cis-Golgi			Actin filaments;Endoplasmic reticulum;Plasma membrane(Approved)				0.0	0.0	0.0	0.0	0.0	0.0	0.0	0.0	0.0	0.0	0.0	0.0	0.0	0.0	0.0	0.0	0.0	0.0	0.0	0.0
ENSG00000180787	124961	ensembl_gene_id	H. sapiens	124961	H. sapiens	ZFP3	ZFP3 zinc finger protein	GO:0006355 regulation of transcription, DNA-templated;GO:1903506 regulation of nucleic acid-templated transcription;GO:0006351 transcription, DNA-templated		Transcription factors/Zinc-coordinating DNA-binding domains	Cytosol;Nucleoplasm(Approved)				0.0	0.0	0.0	0.0	0.0	0.0	0.0	0.0	0.0	0.0	0.0	0.0	0.0	0.0	0.0	0.0	0.0	0.0	0.0	0.0
ENSG00000171161	79894	ensembl_gene_id	H. sapiens	79894	H. sapiens	ZNF672	zinc finger protein 672			Transcription factors/Zinc-coordinating DNA-binding domains	Nucleoplasm(Enhanced)				0.0	0.0	0.0	0.0	0.0	0.0	0.0	0.0	0.0	0.0	0.0	0.0	0.0	0.0	0.0	0.0	0.0	0.0	0.0	0.0
ENSG00000220205	6844	ensembl_gene_id	H. sapiens	6844	H. sapiens	VAMP2	vesicle associated membrane protein 2	GO:1903593 regulation of histamine secretion by mast cell;GO:0043308 eosinophil degranulation;GO:0002553 histamine secretion by mast cell		Transporters/Transporter channels and pores		Botulinum Toxin Type B (Syntaxin-1 binding)	(M247)PID INSULIN GLUCOSE PATHWAY		0.0	0.0	1.0	0.0	0.0	0.0	0.0	0.0	0.0	1.0	0.0	0.0	0.0	0.0	0.0	0.0	0.0	0.0	0.0	0.0
ENSG00000168685	3575	ensembl_gene_id	H. sapiens	3575	H. sapiens	IL7R	interleukin 7 receptor	GO:0001915 negative regulation of T cell mediated cytotoxicity;GO:0033089 positive regulation of T cell differentiation in thymus;GO:0070233 negative regulation of T cell apoptotic process		CD markers	Plasma membrane(Supported)Microtubule organizing center(Uncertain)			(M5932)HALLMARK INFLAMMATORY RESPONSE; (M5953)HALLMARK KRAS SIGNALING UP; (M5890)HALLMARK TNFA SIGNALING VIA NFKB	0.0	0.0	1.0	0.0	0.0	0.0	1.0	0.0	0.0	0.0	0.0	0.0	0.0	0.0	0.0	0.0	0.0	0.0	0.0	0.0
ENSG00000188158	4810	ensembl_gene_id	H. sapiens	4810	H. sapiens	NHS	NHS actin remodeling regulator	GO:0002088 lens development in camera-type eye;GO:0043010 camera-type eye development;GO:0001654 eye development			Cell Junctions(Supported)				0.0	0.0	0.0	0.0	0.0	0.0	0.0	0.0	0.0	0.0	0.0	0.0	0.0	0.0	0.0	0.0	0.0	0.0	0.0	0.0
ENSG00000140416	7168	ensembl_gene_id	H. sapiens	7168	H. sapiens	TPM1	tropomyosin 1	GO:0003065 positive regulation of heart rate by epinephrine;GO:0001996 positive regulation of heart rate by epinephrine-norepinephrine;GO:0003321 positive regulation of blood pressure by epinephrine-norepinephrine			Actin filaments;Cytosol(Approved)			(M5930)HALLMARK EPITHELIAL MESENCHYMAL TRANSITION	0.0	1.0	1.0	0.0	0.0	0.0	0.0	0.0	0.0	1.0	1.0	0.0	0.0	0.0	0.0	0.0	0.0	1.0	0.0	0.0
ENSG00000145934	57451	ensembl_gene_id	H. sapiens	57451	H. sapiens	TENM2	teneurin transmembrane protein 2	GO:0051491 positive regulation of filopodium assembly;GO:0051489 regulation of filopodium assembly;GO:0007157 heterophilic cell-cell adhesion via plasma membrane cell adhesion molecules			Nucleoli(Approved)			(M5956)HALLMARK KRAS SIGNALING DN	0.0	0.0	0.0	0.0	0.0	0.0	1.0	0.0	0.0	0.0	0.0	0.0	0.0	0.0	0.0	0.0	0.0	0.0	0.0	0.0
ENSG00000183049	57118	ensembl_gene_id	H. sapiens	57118	H. sapiens	CAMK1D	calcium/calmodulin dependent protein kinase ID	GO:0090023 positive regulation of neutrophil chemotaxis;GO:0071624 positive regulation of granulocyte chemotaxis;GO:1902624 positive regulation of neutrophil migration	CAMK Ser/Thr protein kinase family	Enzymes/{ENZYME proteins/Transferases,Kinases/CAMK Ser/Thr protein kinases}	Cytosol;Nucleus(Approved)	N-(5-METHYL-1H-PYRAZOL-3-YL)-2-PHENYLQUINAZOLIN-4-AMINE (Calmodulin-dependent protein kinase activity)		(M5956)HALLMARK KRAS SIGNALING DN	1.0	0.0	0.0	0.0	0.0	0.0	1.0	0.0	0.0	0.0	0.0	0.0	0.0	0.0	0.0	1.0	0.0	0.0	0.0	0.0
ENSG00000164171	3673	ensembl_gene_id	H. sapiens	3673	H. sapiens	ITGA2	integrin subunit alpha 2	GO:0033343 positive regulation of collagen binding;GO:0010694 positive regulation of alkaline phosphatase activity;GO:0033341 regulation of collagen binding		CD markers	Cytosol;Nucleus(Approved)		(M274)PID LYMPH ANGIOGENESIS PATHWAY; (M47)PID INTEGRIN CS PATHWAY; (M240)PID SYNDECAN 2 PATHWAY	(M5946)HALLMARK COAGULATION; (M5953)HALLMARK KRAS SIGNALING UP; (M5915)HALLMARK APICAL JUNCTION	1.0	1.0	1.0	0.0	0.0	1.0	1.0	1.0	0.0	1.0	0.0	1.0	0.0	0.0	0.0	0.0	1.0	0.0	0.0	0.0
ENSG00000004660	84254	ensembl_gene_id	H. sapiens	84254	H. sapiens	CAMKK1	calcium/calmodulin dependent protein kinase kinase 1	GO:0045860 positive regulation of protein kinase activity;GO:0033674 positive regulation of kinase activity;GO:0045859 regulation of protein kinase activity	Other	Enzymes/{ENZYME proteins/Transferases,Kinases}	Cytosol(Supported)				0.0	0.0	0.0	1.0	0.0	0.0	0.0	0.0	0.0	0.0	0.0	0.0	0.0	0.0	0.0	0.0	0.0	0.0	0.0	0.0
ENSG00000138587	55329	ensembl_gene_id	H. sapiens	55329	H. sapiens	MNS1	meiosis specific nuclear structural 1	GO:0045724 positive regulation of cilium assembly;GO:0070986 left/right axis specification;GO:1902017 regulation of cilium assembly			Nuclear speckles;Nucleoplasm(Approved)				0.0	0.0	0.0	0.0	0.0	0.0	1.0	0.0	0.0	0.0	0.0	0.0	0.0	0.0	0.0	0.0	0.0	0.0	0.0	0.0
ENSG00000132563	51308	ensembl_gene_id	H. sapiens	51308	H. sapiens	REEP2	receptor accessory protein 2	GO:0032596 protein transport into membrane raft;GO:0050916 sensory perception of sweet taste;GO:1903044 protein localization to membrane raft							0.0	0.0	0.0	0.0	0.0	0.0	0.0	0.0	0.0	0.0	0.0	0.0	0.0	0.0	0.0	0.0	0.0	0.0	0.0	0.0
ENSG00000174276	741	ensembl_gene_id	H. sapiens	741	H. sapiens	ZNHIT2	zinc finger HIT-type containing 2								0.0	0.0	0.0	0.0	0.0	0.0	0.0	0.0	0.0	0.0	0.0	0.0	0.0	0.0	0.0	0.0	0.0	0.0	0.0	0.0
ENSG00000178031	92949	ensembl_gene_id	H. sapiens	92949	H. sapiens	ADAMTSL1	ADAMTS like 1	GO:0006508 proteolysis;GO:0019538 protein metabolic process;GO:1901564 organonitrogen compound metabolic process					(M3468)NABA ECM REGULATORS; (M5885)NABA MATRISOME ASSOCIATED; (M5889)NABA MATRISOME		0.0	0.0	0.0	0.0	0.0	0.0	0.0	0.0	0.0	0.0	0.0	0.0	0.0	0.0	1.0	0.0	0.0	0.0	0.0	0.0
ENSG00000069011	5307	ensembl_gene_id	H. sapiens	5307	H. sapiens	PITX1	paired like homeodomain 1	GO:0014707 branchiomeric skeletal muscle development;GO:0048625 myoblast fate commitment;GO:0035116 embryonic hindlimb morphogenesis		Transcription factors/Helix-turn-helix domains	Nucleoli(Supported)				0.0	0.0	0.0	0.0	0.0	0.0	0.0	0.0	0.0	0.0	0.0	0.0	1.0	0.0	0.0	0.0	0.0	1.0	1.0	0.0
ENSG00000196659	150737	ensembl_gene_id	H. sapiens	150737	H. sapiens	TTC30B	tetratricopeptide repeat domain 30B	GO:0035735 intraciliary transport involved in cilium assembly;GO:0042073 intraciliary transport;GO:0010970 transport along microtubule			Centrosome;Nucleus(Approved)				0.0	0.0	0.0	0.0	0.0	0.0	0.0	0.0	0.0	0.0	0.0	0.0	0.0	0.0	0.0	0.0	0.0	0.0	0.0	0.0
ENSG00000168679	9122	ensembl_gene_id	H. sapiens	9122	H. sapiens	SLC16A4	solute carrier family 16 member 4	GO:0015718 monocarboxylic acid transport;GO:0046942 carboxylic acid transport;GO:0015849 organic acid transport			Cytokinetic bridge;Cytosol;Microtubules(Approved)	Pyruvic acid (Symporter activity)			0.0	0.0	0.0	0.0	0.0	0.0	0.0	0.0	0.0	0.0	0.0	0.0	0.0	0.0	0.0	0.0	0.0	0.0	0.0	0.0
ENSG00000197594	5167	ensembl_gene_id	H. sapiens	5167	H. sapiens	ENPP1	ectonucleotide pyrophosphatase/phosphodiesterase 1	GO:0046325 negative regulation of glucose import;GO:0045719 negative regulation of glycogen biosynthetic process;GO:1990787 negative regulation of hh target transcription factor activity		CD markers;Enzymes/ENZYME proteins/Hydrolases		Ribavirin (Zinc ion binding);Amifostine (Zinc ion binding)		(M5947)HALLMARK IL2 STAT5 SIGNALING	0.0	0.0	0.0	0.0	1.0	0.0	0.0	0.0	0.0	0.0	0.0	1.0	0.0	1.0	0.0	0.0	0.0	0.0	0.0	0.0
ENSG00000162702	23528	ensembl_gene_id	H. sapiens	23528	H. sapiens	ZNF281	zinc finger protein 281	GO:0010172 embryonic body morphogenesis;GO:0010171 body morphogenesis;GO:0000122 negative regulation of transcription by RNA polymerase II		Transcription factors/Zinc-coordinating DNA-binding domains	Nucleoplasm(Enhanced)				0.0	0.0	0.0	0.0	0.0	0.0	0.0	0.0	0.0	0.0	0.0	0.0	0.0	0.0	0.0	0.0	0.0	0.0	0.0	0.0
ENSG00000125247	84899	ensembl_gene_id	H. sapiens	84899	H. sapiens	TMTC4	transmembrane O-mannosyltransferase targeting cadherins 4	GO:0035269 protein O-linked mannosylation;GO:0035268 protein mannosylation;GO:0006493 protein O-linked glycosylation			Vesicles(Approved)				0.0	0.0	0.0	0.0	0.0	0.0	0.0	0.0	0.0	0.0	0.0	0.0	0.0	0.0	0.0	0.0	0.0	0.0	0.0	0.0
ENSG00000110047	10938	ensembl_gene_id	H. sapiens	10938	H. sapiens	EHD1	EH domain containing 1	GO:0010886 positive regulation of cholesterol storage;GO:2001137 positive regulation of endocytic recycling;GO:1901741 positive regulation of myoblast fusion			Plasma membrane(Supported)			(M5921)HALLMARK COMPLEMENT; (M5890)HALLMARK TNFA SIGNALING VIA NFKB	0.0	0.0	0.0	0.0	0.0	0.0	0.0	0.0	1.0	1.0	0.0	0.0	0.0	0.0	0.0	0.0	0.0	1.0	0.0	0.0
ENSG00000119636	80127	ensembl_gene_id	H. sapiens	80127	H. sapiens	BBOF1	basal body orientation factor 1	GO:0044458 motile cilium assembly;GO:0060271 cilium assembly;GO:0044782 cilium organization			Microtubule organizing center;Nucleus;Plasma membrane(Approved)				0.0	0.0	0.0	0.0	0.0	0.0	0.0	0.0	0.0	0.0	0.0	0.0	0.0	0.0	0.0	0.0	0.0	0.0	0.0	0.0
ENSG00000105656	8178	ensembl_gene_id	H. sapiens	8178	H. sapiens	ELL	elongation factor for RNA polymerase II	GO:0042796 snRNA transcription by RNA polymerase III;GO:0045945 positive regulation of transcription by RNA polymerase III;GO:0042795 snRNA transcription by RNA polymerase II						(M5898)HALLMARK DNA REPAIR	0.0	0.0	0.0	0.0	0.0	0.0	0.0	0.0	0.0	0.0	0.0	0.0	0.0	1.0	0.0	0.0	0.0	0.0	0.0	0.0
ENSG00000144791	8994	ensembl_gene_id	H. sapiens	8994	H. sapiens	LIMD1	LIM domains containing 1	GO:2000637 positive regulation of gene silencing by miRNA;GO:0035331 negative regulation of hippo signaling;GO:0060148 positive regulation of posttranscriptional gene silencing			Focal adhesion sites;Nucleus(Supported)				0.0	0.0	0.0	0.0	1.0	0.0	0.0	0.0	0.0	0.0	0.0	0.0	0.0	1.0	0.0	0.0	0.0	0.0	0.0	0.0
ENSG00000136696	27177	ensembl_gene_id	H. sapiens	27177	H. sapiens	IL36B	interleukin 36 beta	GO:0045582 positive regulation of T cell differentiation;GO:0045621 positive regulation of lymphocyte differentiation;GO:0045580 regulation of T cell differentiation					(M5883)NABA SECRETED FACTORS; (M5885)NABA MATRISOME ASSOCIATED; (M5889)NABA MATRISOME		0.0	0.0	1.0	0.0	0.0	0.0	0.0	0.0	0.0	0.0	0.0	0.0	0.0	0.0	1.0	0.0	0.0	0.0	0.0	0.0
ENSG00000069399	602	ensembl_gene_id	H. sapiens	602	H. sapiens	BCL3	BCL3 transcription coactivator	GO:0045064 T-helper 2 cell differentiation;GO:0002315 marginal zone B cell differentiation;GO:0045082 positive regulation of interleukin-10 biosynthetic process		Transcription factors/Immunoglobulin fold	Nucleoplasm(Supported)Midbody;Vesicles(Approved)		(M26)PID NFKAPPAB ATYPICAL PATHWAY	(M5950)HALLMARK ALLOGRAFT REJECTION; (M5890)HALLMARK TNFA SIGNALING VIA NFKB; (M5901)HALLMARK G2M CHECKPOINT	0.0	0.0	1.0	0.0	0.0	0.0	0.0	1.0	0.0	0.0	0.0	0.0	0.0	1.0	0.0	0.0	0.0	0.0	0.0	0.0
ENSG00000120738	1958	ensembl_gene_id	H. sapiens	1958	H. sapiens	EGR1	early growth response 1	GO:0072303 positive regulation of glomerular metanephric mesangial cell proliferation;GO:0072301 regulation of metanephric glomerular mesangial cell proliferation;GO:0072126 positive regulation of glomerular mesangial cell proliferation		Transcription factors/Zinc-coordinating DNA-binding domains	Nucleoplasm(Enhanced)		(M11)PID PRL SIGNALING EVENTS PATHWAY; (M270)PID MAPK TRK PATHWAY; (M271)PID PI3K PLC TRK PATHWAY	(M5890)HALLMARK TNFA SIGNALING VIA NFKB	0.0	1.0	1.0	1.0	0.0	1.0	0.0	0.0	1.0	0.0	0.0	1.0	0.0	0.0	0.0	1.0	0.0	1.0	1.0	0.0
ENSG00000140961	29948	ensembl_gene_id	H. sapiens	29948	H. sapiens	OSGIN1	oxidative stress induced growth inhibitor 1	GO:0030308 negative regulation of cell growth;GO:0045926 negative regulation of growth;GO:0043065 positive regulation of apoptotic process			Cytosol;Nucleoplasm(Approved)			(M5939)HALLMARK P53 PATHWAY	0.0	0.0	0.0	0.0	0.0	0.0	0.0	0.0	0.0	0.0	0.0	0.0	0.0	0.0	0.0	1.0	0.0	0.0	0.0	0.0
ENSG00000107562	6387	ensembl_gene_id	H. sapiens	6387	H. sapiens	CXCL12	C-X-C motif chemokine ligand 12	GO:0048842 positive regulation of axon extension involved in axon guidance;GO:1903237 negative regulation of leukocyte tethering or rolling;GO:0033603 positive regulation of dopamine secretion				Tinzaparin	(M165)PID SYNDECAN 4 PATHWAY; (M255)PID HIF1 TFPATHWAY; (M124)PID CXCR4 PATHWAY	(M5906)HALLMARK ESTROGEN RESPONSE EARLY; (M5930)HALLMARK EPITHELIAL MESENCHYMAL TRANSITION; (M5907)HALLMARK ESTROGEN RESPONSE LATE	1.0	0.0	1.0	0.0	0.0	0.0	1.0	0.0	0.0	0.0	0.0	1.0	0.0	1.0	1.0	0.0	0.0	0.0	0.0	0.0
ENSG00000154447	57630	ensembl_gene_id	H. sapiens	57630	H. sapiens	SH3RF1	SH3 domain containing ring finger 1	GO:2000564 regulation of CD8-positive, alpha-beta T cell proliferation;GO:0035740 CD8-positive, alpha-beta T cell proliferation;GO:0043370 regulation of CD4-positive, alpha-beta T cell differentiation		Enzymes/ENZYME proteins/Transferases	Vesicles(Supported)Intermediate filaments(Approved)				0.0	0.0	1.0	1.0	0.0	0.0	0.0	0.0	0.0	0.0	0.0	0.0	0.0	0.0	0.0	0.0	0.0	0.0	0.0	0.0
ENSG00000060982	586	ensembl_gene_id	H. sapiens	586	H. sapiens	BCAT1	branched chain amino acid transaminase 1	GO:0009099 valine biosynthetic process;GO:0009098 leucine biosynthetic process;GO:0006573 valine metabolic process		Enzymes/ENZYME proteins/Transferases		Pyridoxal Phosphate (L-valine transaminase activity);L-Glutamic Acid (L-valine transaminase activity);L-Leucine (L-valine transaminase activity);L-Valine (L-valine transaminase activity);L-Isoleucine (L-valine transaminase activity);N'-(5-CHLOROBENZOFURAN-2-CARBONYL)-2-(TRIFLUOROMETHYL)BENZENESULFONOHYDRAZIDE (L-valine transaminase activity)	(M66)PID MYC ACTIV PATHWAY	(M5950)HALLMARK ALLOGRAFT REJECTION; (M5924)HALLMARK MTORC1 SIGNALING; (M5934)HALLMARK XENOBIOTIC METABOLISM	0.0	0.0	0.0	0.0	0.0	0.0	0.0	0.0	0.0	0.0	0.0	0.0	0.0	0.0	0.0	0.0	0.0	0.0	0.0	0.0
ENSG00000248098	593	ensembl_gene_id	H. sapiens	593	H. sapiens	BCKDHA	branched chain keto acid dehydrogenase E1 subunit alpha	GO:0009083 branched-chain amino acid catabolic process;GO:0009081 branched-chain amino acid metabolic process;GO:0009063 cellular amino acid catabolic process		Enzymes/ENZYME proteins/Oxidoreductases				(M5905)HALLMARK ADIPOGENESIS; (M5936)HALLMARK OXIDATIVE PHOSPHORYLATION	0.0	0.0	0.0	0.0	0.0	0.0	0.0	0.0	0.0	0.0	0.0	0.0	0.0	0.0	0.0	0.0	0.0	0.0	0.0	0.0
ENSG00000110066	51111	ensembl_gene_id	H. sapiens	51111	H. sapiens	KMT5B	lysine methyltransferase 5B	GO:0045830 positive regulation of isotype switching;GO:0045191 regulation of isotype switching;GO:0034773 histone H4-K20 trimethylation		Enzymes/ENZYME proteins/Transferases	Nucleus(Supported)		(M115)PID REG GR PATHWAY		0.0	0.0	1.0	0.0	0.0	0.0	0.0	0.0	0.0	0.0	0.0	0.0	0.0	0.0	0.0	0.0	0.0	1.0	0.0	0.0
ENSG00000101134	55816	ensembl_gene_id	H. sapiens	55816	H. sapiens	DOK5	docking protein 5	GO:0051386 regulation of neurotrophin TRK receptor signaling pathway;GO:0048011 neurotrophin TRK receptor signaling pathway;GO:0038179 neurotrophin signaling pathway			Focal adhesion sites(Approved)		(M82)PID RET PATHWAY		0.0	0.0	0.0	1.0	0.0	0.0	1.0	0.0	1.0	0.0	0.0	1.0	0.0	0.0	0.0	0.0	0.0	0.0	0.0	0.0
ENSG00000130052	9754	ensembl_gene_id	H. sapiens	9754	H. sapiens	STARD8	StAR related lipid transfer domain containing 8	GO:0043547 positive regulation of GTPase activity;GO:0051056 regulation of small GTPase mediated signal transduction;GO:0043087 regulation of GTPase activity							0.0	0.0	0.0	0.0	0.0	0.0	0.0	0.0	0.0	0.0	0.0	0.0	0.0	0.0	0.0	0.0	0.0	0.0	0.0	0.0
ENSG00000123610	7130	ensembl_gene_id	H. sapiens	7130	H. sapiens	TNFAIP6	TNF alpha induced protein 6	GO:0030728 ovulation;GO:0043312 neutrophil degranulation;GO:0002283 neutrophil activation involved in immune response				Hyaluronic acid (Hyaluronic acid binding)	(M3008)NABA ECM GLYCOPROTEINS; (M5884)NABA CORE MATRISOME; (M5889)NABA MATRISOME	(M5932)HALLMARK INFLAMMATORY RESPONSE; (M5913)HALLMARK INTERFERON GAMMA RESPONSE; (M5890)HALLMARK TNFA SIGNALING VIA NFKB	1.0	0.0	0.0	0.0	0.0	0.0	0.0	1.0	0.0	1.0	0.0	0.0	0.0	0.0	0.0	0.0	0.0	0.0	0.0	0.0
ENSG00000166750	162394	ensembl_gene_id	H. sapiens	162394	H. sapiens	SLFN5	schlafen family member 5	GO:0030154 cell differentiation;GO:0048869 cellular developmental process;GO:0032502 developmental process			Nucleoplasm;Vesicles(Approved)				0.0	0.0	0.0	0.0	0.0	0.0	0.0	0.0	0.0	0.0	0.0	0.0	0.0	0.0	0.0	0.0	0.0	0.0	0.0	0.0
ENSG00000177427	125170	ensembl_gene_id	H. sapiens	125170	H. sapiens	MIEF2	mitochondrial elongation factor 2	GO:0003374 dynamin family protein polymerization involved in mitochondrial fission;GO:0003373 dynamin family protein polymerization involved in membrane fission;GO:0090314 positive regulation of protein targeting to membrane							0.0	0.0	0.0	0.0	0.0	0.0	0.0	0.0	0.0	0.0	0.0	0.0	0.0	0.0	0.0	0.0	0.0	0.0	0.0	0.0
ENSG00000153976	9955	ensembl_gene_id	H. sapiens	9955	H. sapiens	HS3ST3A1	heparan sulfate-glucosamine 3-sulfotransferase 3A1	GO:0006024 glycosaminoglycan biosynthetic process;GO:0006023 aminoglycan biosynthetic process;GO:0030203 glycosaminoglycan metabolic process		Enzymes/ENZYME proteins/Transferases	Microtubules(Approved)	Adenosine-3'-5'-Diphosphate (Sulfotransferase activity);O2-Sulfo-Glucuronic Acid (Sulfotransferase activity);N,O6-Disulfo-Glucosamine (Sulfotransferase activity);1,4-Dideoxy-5-Dehydro-O2-Sulfo-Glucuronic Acid (Sulfotransferase activity);Citric Acid (Sulfotransferase activity)			0.0	0.0	0.0	0.0	0.0	0.0	0.0	0.0	0.0	0.0	0.0	0.0	0.0	0.0	0.0	0.0	0.0	0.0	0.0	0.0
ENSG00000148225	114987	ensembl_gene_id	H. sapiens	114987	H. sapiens	WDR31	WD repeat domain 31				Cytosol;Nuclear bodies(Approved)				0.0	0.0	0.0	0.0	0.0	0.0	0.0	0.0	0.0	0.0	0.0	0.0	0.0	0.0	0.0	0.0	0.0	0.0	0.0	0.0
ENSG00000133069	9911	ensembl_gene_id	H. sapiens	9911	H. sapiens	TMCC2	transmembrane and coiled-coil domain family 2	GO:0042982 amyloid precursor protein metabolic process;GO:0019538 protein metabolic process;GO:1901564 organonitrogen compound metabolic process						(M5945)HALLMARK HEME METABOLISM	0.0	0.0	0.0	0.0	0.0	0.0	0.0	0.0	0.0	0.0	0.0	0.0	0.0	0.0	0.0	0.0	0.0	0.0	0.0	0.0
ENSG00000196639	3269	ensembl_gene_id	H. sapiens	3269	H. sapiens	HRH1	histamine receptor H1	GO:0032962 positive regulation of inositol trisphosphate biosynthetic process;GO:0032960 regulation of inositol trisphosphate biosynthetic process;GO:0060732 positive regulation of inositol phosphate biosynthetic process		G-protein coupled receptors/GPCRs excl olfactory receptors	Plasma membrane(Supported)Cytosol(Approved)	Citalopram (Histamine receptor activity);Benzatropine (Histamine receptor activity);Ziprasidone (Histamine receptor activity);Clemastine (Histamine receptor activity);Amitriptyline (Histamine receptor activity);Olanzapine (Histamine receptor activity);Cetirizine (Histamine receptor activity);Terfenadine (Histamine receptor activity);Buclizine (Histamine receptor activity);Clozapine (Histamine rec…		(M5932)HALLMARK INFLAMMATORY RESPONSE	0.0	0.0	0.0	0.0	0.0	0.0	1.0	0.0	0.0	0.0	0.0	0.0	0.0	0.0	0.0	0.0	0.0	0.0	0.0	0.0
ENSG00000170417	130827	ensembl_gene_id	H. sapiens	130827	H. sapiens	TMEM182	transmembrane protein 182				Nucleoplasm;Vesicles(Approved)				0.0	0.0	0.0	0.0	0.0	0.0	0.0	0.0	0.0	0.0	0.0	0.0	0.0	0.0	0.0	0.0	0.0	0.0	0.0	0.0
ENSG00000197852	55924	ensembl_gene_id	H. sapiens	55924	H. sapiens	INKA2	inka box actin regulator 2	GO:0071901 negative regulation of protein serine/threonine kinase activity;GO:0006469 negative regulation of protein kinase activity;GO:0033673 negative regulation of kinase activity			Nucleus(Approved)				0.0	0.0	0.0	1.0	0.0	0.0	0.0	0.0	0.0	0.0	0.0	0.0	0.0	1.0	0.0	0.0	0.0	0.0	0.0	0.0
ENSG00000213722	23564	ensembl_gene_id	H. sapiens	23564	H. sapiens	DDAH2	dimethylarginine dimethylaminohydrolase 2	GO:0006527 arginine catabolic process;GO:0000052 citrulline metabolic process;GO:0045429 positive regulation of nitric oxide biosynthetic process		Enzymes/ENZYME proteins/Hydrolases	Cytosol;Microtubule organizing center(Uncertain)	L-Citrulline (Dimethylargininase activity)		(M5934)HALLMARK XENOBIOTIC METABOLISM	0.0	0.0	0.0	0.0	0.0	0.0	0.0	0.0	0.0	0.0	0.0	0.0	0.0	0.0	0.0	0.0	0.0	0.0	0.0	0.0
ENSG00000189052	93659	ensembl_gene_id	H. sapiens	93659	H. sapiens	CGB5	chorionic gonadotropin subunit beta 5				Cytosol(Approved)				0.0	0.0	0.0	0.0	0.0	0.0	0.0	0.0	0.0	0.0	0.0	0.0	0.0	0.0	0.0	0.0	0.0	0.0	0.0	0.0
ENSG00000152133	253635	ensembl_gene_id	H. sapiens	253635	H. sapiens	GPATCH11	G-patch domain containing 11				Nucleus(Supported)				0.0	0.0	0.0	0.0	0.0	0.0	0.0	0.0	0.0	0.0	0.0	0.0	0.0	0.0	0.0	0.0	0.0	0.0	0.0	0.0
ENSG00000136111	9882	ensembl_gene_id	H. sapiens	9882	H. sapiens	TBC1D4	TBC1 domain family member 4	GO:0031339 negative regulation of vesicle fusion;GO:0031338 regulation of vesicle fusion;GO:0090630 activation of GTPase activity		Transporters/Accessory Factors Involved in Transport	Cytosol(Supported)		(M247)PID INSULIN GLUCOSE PATHWAY; (M249)PID PI3KCI AKT PATHWAY		0.0	0.0	0.0	0.0	0.0	0.0	0.0	0.0	0.0	0.0	0.0	0.0	0.0	0.0	0.0	0.0	0.0	0.0	0.0	0.0
ENSG00000171130	155066	ensembl_gene_id	H. sapiens	155066	H. sapiens	ATP6V0E2	ATPase H+ transporting V0 subunit e2	GO:0090383 phagosome acidification;GO:0007035 vacuolar acidification;GO:0033572 transferrin transport							0.0	0.0	0.0	0.0	0.0	0.0	0.0	0.0	0.0	0.0	0.0	1.0	0.0	0.0	0.0	0.0	0.0	0.0	0.0	0.0
ENSG00000080823	5891	ensembl_gene_id	H. sapiens	5891	H. sapiens	MOK	MOK protein kinase	GO:0051726 regulation of cell cycle;GO:0006468 protein phosphorylation;GO:0016310 phosphorylation	CMGC Ser/Thr protein kinase family	Enzymes/{ENZYME proteins/Transferases,Kinases/CMGC Ser/Thr protein kinases}	Endoplasmic reticulum(Supported)				0.0	0.0	0.0	0.0	0.0	0.0	0.0	0.0	0.0	0.0	0.0	0.0	0.0	0.0	0.0	0.0	0.0	0.0	0.0	0.0
ENSG00000113369	57561	ensembl_gene_id	H. sapiens	57561	H. sapiens	ARRDC3	arrestin domain containing 3	GO:0031651 negative regulation of heat generation;GO:0071878 negative regulation of adenylate cyclase-activating adrenergic receptor signaling pathway;GO:0090327 negative regulation of locomotion involved in locomotory behavior							0.0	0.0	0.0	1.0	0.0	0.0	0.0	0.0	0.0	0.0	0.0	0.0	0.0	1.0	0.0	0.0	1.0	0.0	1.0	0.0
ENSG00000163611	152185	ensembl_gene_id	H. sapiens	152185	H. sapiens	SPICE1	spindle and centriole associated protein 1	GO:0046599 regulation of centriole replication;GO:0010824 regulation of centrosome duplication;GO:0007099 centriole replication			Centrosome(Supported)				0.0	0.0	0.0	0.0	0.0	0.0	0.0	0.0	0.0	0.0	0.0	0.0	0.0	0.0	0.0	0.0	0.0	0.0	0.0	0.0
ENSG00000110076	9379	ensembl_gene_id	H. sapiens	9379	H. sapiens	NRXN2	neurexin 2	GO:0097116 gephyrin clustering involved in postsynaptic density assembly;GO:0042297 vocal learning;GO:0097118 neuroligin clustering involved in postsynaptic membrane assembly						(M5915)HALLMARK APICAL JUNCTION	0.0	0.0	0.0	0.0	0.0	0.0	0.0	0.0	0.0	0.0	0.0	0.0	0.0	0.0	0.0	0.0	0.0	0.0	0.0	0.0
ENSG00000058668	493	ensembl_gene_id	H. sapiens	493	H. sapiens	ATP2B4	ATPase plasma membrane Ca2+ transporting 4	GO:1900082 negative regulation of arginine catabolic process;GO:1903249 negative regulation of citrulline biosynthetic process;GO:0140199 negative regulation of adenylate cyclase-activating adrenergic receptor signaling pathway involved in heart process		Enzymes/ENZYME proteins/Hydrolases;Transporters/Primary Active Transporters	Plasma membrane(Supported)			(M5942)HALLMARK UV RESPONSE DN; (M5907)HALLMARK ESTROGEN RESPONSE LATE	0.0	0.0	0.0	1.0	0.0	1.0	0.0	0.0	1.0	0.0	0.0	0.0	0.0	1.0	0.0	0.0	0.0	0.0	0.0	0.0
ENSG00000013392	112611	ensembl_gene_id	H. sapiens	112611	H. sapiens	RWDD2A	RWD domain containing 2A								0.0	0.0	0.0	0.0	0.0	0.0	0.0	0.0	0.0	0.0	0.0	0.0	0.0	0.0	0.0	0.0	0.0	0.0	0.0	0.0
ENSG00000065060	54887	ensembl_gene_id	H. sapiens	54887	H. sapiens	UHRF1BP1	UHRF1 binding protein 1				Cytosol;Nuclear membrane;Nucleoplasm(Approved)				0.0	0.0	0.0	0.0	0.0	0.0	0.0	0.0	0.0	0.0	0.0	0.0	0.0	0.0	0.0	0.0	0.0	0.0	0.0	0.0
ENSG00000107338	6461	ensembl_gene_id	H. sapiens	6461	H. sapiens	SHB	SH2 domain containing adaptor protein B	GO:0048010 vascular endothelial growth factor receptor signaling pathway;GO:0001525 angiogenesis;GO:0048514 blood vessel morphogenesis			Cytosol;Nucleoplasm(Enhanced)Cytoplasmic bodies(Approved)		(M206)PID PDGFRA PATHWAY; (M237)PID VEGFR1 2 PATHWAY		0.0	0.0	0.0	0.0	0.0	1.0	0.0	0.0	0.0	0.0	0.0	1.0	0.0	0.0	0.0	0.0	0.0	0.0	0.0	0.0
ENSG00000177432	266812	ensembl_gene_id	H. sapiens	266812	H. sapiens	NAP1L5	nucleosome assembly protein 1 like 5	GO:0006334 nucleosome assembly;GO:0031497 chromatin assembly;GO:0034728 nucleosome organization			Cytosol;Nucleoplasm(Approved)				0.0	0.0	0.0	0.0	0.0	0.0	0.0	0.0	0.0	0.0	0.0	0.0	0.0	0.0	0.0	0.0	0.0	0.0	0.0	0.0
ENSG00000143367	7286	ensembl_gene_id	H. sapiens	7286	H. sapiens	TUFT1	tuftelin 1	GO:0030282 bone mineralization;GO:0042476 odontogenesis;GO:0031214 biomineral tissue development			Vesicles(Approved)				0.0	0.0	0.0	0.0	1.0	0.0	0.0	0.0	0.0	0.0	0.0	0.0	0.0	0.0	0.0	0.0	0.0	0.0	0.0	0.0
ENSG00000131459	9945	ensembl_gene_id	H. sapiens	9945	H. sapiens	GFPT2	glutamine-fructose-6-phosphate transaminase 2	GO:0006048 UDP-N-acetylglucosamine biosynthetic process;GO:0006541 glutamine metabolic process;GO:0006047 UDP-N-acetylglucosamine metabolic process		Enzymes/ENZYME proteins/Transferases	Vesicles(Supported)			(M5953)HALLMARK KRAS SIGNALING UP; (M5890)HALLMARK TNFA SIGNALING VIA NFKB	0.0	0.0	0.0	0.0	0.0	0.0	0.0	0.0	0.0	0.0	0.0	0.0	0.0	0.0	0.0	0.0	0.0	0.0	0.0	0.0
ENSG00000107249	169792	ensembl_gene_id	H. sapiens	169792	H. sapiens	GLIS3	GLIS family zinc finger 3	GO:0000122 negative regulation of transcription by RNA polymerase II;GO:0045944 positive regulation of transcription by RNA polymerase II;GO:0045892 negative regulation of transcription, DNA-templated		Transcription factors/Zinc-coordinating DNA-binding domains	Nucleoplasm(Supported)				0.0	0.0	0.0	0.0	0.0	0.0	0.0	0.0	0.0	0.0	0.0	0.0	0.0	0.0	0.0	0.0	0.0	0.0	0.0	0.0
ENSG00000177706	56975	ensembl_gene_id	H. sapiens	56975	H. sapiens	FAM20C	FAM20C golgi associated secretory pathway kinase	GO:0036179 osteoclast maturation;GO:0071895 odontoblast differentiation;GO:0036035 osteoclast development		Enzymes/ENZYME proteins/Transferases	Cytosol;Golgi apparatus;Nucleoplasm(Approved)		(M3468)NABA ECM REGULATORS; (M5885)NABA MATRISOME ASSOCIATED; (M5889)NABA MATRISOME		0.0	0.0	1.0	0.0	1.0	0.0	0.0	0.0	1.0	0.0	0.0	1.0	1.0	0.0	1.0	0.0	1.0	0.0	0.0	0.0
ENSG00000160796	23218	ensembl_gene_id	H. sapiens	23218	H. sapiens	NBEAL2	neurobeachin like 2	GO:0030220 platelet formation;GO:0036344 platelet morphogenesis;GO:0043312 neutrophil degranulation							0.0	0.0	0.0	0.0	0.0	0.0	1.0	0.0	0.0	0.0	0.0	0.0	0.0	0.0	0.0	0.0	0.0	0.0	0.0	0.0
ENSG00000149090	25891	ensembl_gene_id	H. sapiens	25891	H. sapiens	PAMR1	peptidase domain containing associated with muscle regeneration 1			Enzymes/Peptidases/Serine-type peptidases			(M3468)NABA ECM REGULATORS; (M5885)NABA MATRISOME ASSOCIATED; (M5889)NABA MATRISOME		0.0	0.0	0.0	0.0	0.0	0.0	0.0	0.0	0.0	0.0	0.0	0.0	0.0	0.0	1.0	0.0	0.0	0.0	0.0	0.0
ENSG00000196511	27010	ensembl_gene_id	H. sapiens	27010	H. sapiens	TPK1	thiamin pyrophosphokinase 1	GO:0009229 thiamine diphosphate biosynthetic process;GO:0006772 thiamine metabolic process;GO:0042357 thiamine diphosphate metabolic process		Enzymes/ENZYME proteins/Transferases	Vesicles(Approved)	Thiamine (Thiamine diphosphokinase activity);Pyrithiamine Pyrophosphate (Thiamine diphosphokinase activity)			0.0	0.0	0.0	0.0	0.0	0.0	0.0	0.0	0.0	0.0	0.0	0.0	0.0	0.0	0.0	0.0	0.0	0.0	0.0	0.0
ENSG00000023171	57476	ensembl_gene_id	H. sapiens	57476	H. sapiens	GRAMD1B	GRAM domain containing 1B	GO:0071397 cellular response to cholesterol;GO:0036315 cellular response to sterol;GO:0070723 response to cholesterol		Transporters	Intermediate filaments;Nucleoli;Nucleus(Approved)				0.0	0.0	0.0	0.0	0.0	0.0	0.0	0.0	0.0	0.0	0.0	0.0	0.0	0.0	0.0	0.0	0.0	0.0	0.0	0.0
ENSG00000151617	1909	ensembl_gene_id	H. sapiens	1909	H. sapiens	EDNRA	endothelin receptor type A	GO:0014824 artery smooth muscle contraction;GO:0014829 vascular smooth muscle contraction;GO:0007202 activation of phospholipase C activity		G-protein coupled receptors/GPCRs excl olfactory receptors		Bosentan (Phosphatidylinositol phospholipase c activity);Acetylsalicylic acid (Phosphatidylinositol phospholipase c activity);2-HYDROXY-3,5-DIIODOBENZOIC ACID (Phosphatidylinositol phospholipase c activity);Darusentan (Phosphatidylinositol phospholipase c activity);PS433540 (Phosphatidylinositol phospholipase c activity);SPP 301 (Phosphatidylinositol phospholipase c activity);Actelion-1 (Phosphat…	(M8)PID ENDOTHELIN PATHWAY		0.0	1.0	0.0	0.0	0.0	1.0	1.0	0.0	0.0	0.0	0.0	0.0	0.0	0.0	0.0	0.0	0.0	0.0	0.0	0.0
ENSG00000130720	84929	ensembl_gene_id	H. sapiens	84929	H. sapiens	FIBCD1	fibrinogen C domain containing 1				Cell Junctions(Supported)				0.0	0.0	0.0	0.0	0.0	0.0	0.0	0.0	0.0	0.0	0.0	0.0	0.0	0.0	0.0	0.0	0.0	0.0	0.0	0.0
ENSG00000113361	1004	ensembl_gene_id	H. sapiens	1004	H. sapiens	CDH6	cadherin 6	GO:0016339 calcium-dependent cell-cell adhesion via plasma membrane cell adhesion molecules;GO:0044331 cell-cell adhesion mediated by cadherin;GO:0007156 homophilic cell adhesion via plasma membrane adhesion molecules						(M5915)HALLMARK APICAL JUNCTION; (M5930)HALLMARK EPITHELIAL MESENCHYMAL TRANSITION	0.0	0.0	0.0	0.0	0.0	0.0	0.0	0.0	0.0	0.0	0.0	0.0	0.0	0.0	0.0	0.0	0.0	0.0	0.0	0.0
ENSG00000163110	10611	ensembl_gene_id	H. sapiens	10611	H. sapiens	PDLIM5	PDZ and LIM domain 5	GO:0061001 regulation of dendritic spine morphogenesis;GO:0061049 cell growth involved in cardiac muscle cell development;GO:0060997 dendritic spine morphogenesis			Focal adhesion sites;Nucleoplasm;Plasma membrane(Supported)			(M5908)HALLMARK ANDROGEN RESPONSE; (M5942)HALLMARK UV RESPONSE DN; (M5893)HALLMARK MITOTIC SPINDLE	0.0	0.0	0.0	0.0	0.0	0.0	1.0	0.0	0.0	0.0	0.0	0.0	0.0	0.0	0.0	0.0	0.0	1.0	0.0	0.0
ENSG00000148848	8038	ensembl_gene_id	H. sapiens	8038	H. sapiens	ADAM12	ADAM metallopeptidase domain 12	GO:0045766 positive regulation of angiogenesis;GO:0007520 myoblast fusion;GO:0045765 regulation of angiogenesis		Transporters/Accessory Factors Involved in Transport	Plasma membrane(Supported)		(M118)PID INTEGRIN A9B1 PATHWAY; (M165)PID SYNDECAN 4 PATHWAY; (M17)PID NOTCH PATHWAY	(M5909)HALLMARK MYOGENESIS; (M5930)HALLMARK EPITHELIAL MESENCHYMAL TRANSITION	0.0	0.0	0.0	0.0	0.0	1.0	0.0	1.0	0.0	0.0	0.0	1.0	0.0	0.0	1.0	0.0	0.0	1.0	0.0	0.0
ENSG00000130775	9473	ensembl_gene_id	H. sapiens	9473	H. sapiens	THEMIS2	thymocyte selection associated family member 2	GO:0050852 T cell receptor signaling pathway;GO:0050851 antigen receptor-mediated signaling pathway;GO:0002429 immune response-activating cell surface receptor signaling pathway			Golgi apparatus(Approved)				0.0	0.0	0.0	0.0	0.0	0.0	0.0	0.0	0.0	0.0	0.0	0.0	0.0	0.0	0.0	0.0	0.0	0.0	0.0	0.0
ENSG00000116396	3749	ensembl_gene_id	H. sapiens	3749	H. sapiens	KCNC4	potassium voltage-gated channel subfamily C member 4	GO:0046928 regulation of neurotransmitter secretion;GO:0071805 potassium ion transmembrane transport;GO:0007269 neurotransmitter secretion		Voltage-gated ion channels/Voltage-Gated Potassium Channels	Cytosol(Approved)Nucleoli(Uncertain)	Phosphonoserine (Voltage-gated potassium channel activity)			0.0	0.0	0.0	0.0	0.0	0.0	0.0	0.0	0.0	0.0	0.0	0.0	0.0	0.0	0.0	0.0	0.0	0.0	0.0	0.0
ENSG00000169629	727851	ensembl_gene_id	H. sapiens	727851	H. sapiens	RGPD8	RANBP2 like and GRIP domain containing 8	GO:0006607 NLS-bearing protein import into nucleus;GO:0006606 protein import into nucleus;GO:0051170 import into nucleus			Nuclear membrane;Vesicles(Uncertain)				0.0	0.0	0.0	0.0	0.0	0.0	0.0	0.0	0.0	0.0	0.0	0.0	0.0	0.0	0.0	0.0	0.0	0.0	0.0	0.0
ENSG00000168781	9677	ensembl_gene_id	H. sapiens	9677	H. sapiens	PPIP5K1	diphosphoinositol pentakisphosphate kinase 1	GO:0006020 inositol metabolic process;GO:0032958 inositol phosphate biosynthetic process;GO:0043647 inositol phosphate metabolic process		Enzymes/ENZYME proteins/Transferases	Cytosol(Supported)				0.0	0.0	0.0	0.0	0.0	0.0	0.0	0.0	0.0	0.0	0.0	0.0	0.0	0.0	0.0	0.0	0.0	0.0	0.0	0.0
ENSG00000165046	137994	ensembl_gene_id	H. sapiens	137994	H. sapiens	LETM2	leucine zipper and EF-hand containing transmembrane protein 2	GO:0006875 cellular metal ion homeostasis;GO:0030003 cellular cation homeostasis;GO:0055065 metal ion homeostasis			Cytosol;Nuclear bodies;Nucleus(Approved)				0.0	0.0	0.0	0.0	0.0	0.0	0.0	0.0	0.0	0.0	0.0	0.0	0.0	0.0	0.0	0.0	0.0	0.0	0.0	0.0
ENSG00000082458	1741	ensembl_gene_id	H. sapiens	1741	H. sapiens	DLG3	discs large MAGUK scaffold protein 3	GO:0099562 maintenance of postsynaptic density structure;GO:0098880 maintenance of postsynaptic specialization structure;GO:2000310 regulation of NMDA receptor activity			Nucleoli;Nucleus(Approved)				0.0	1.0	0.0	1.0	0.0	0.0	0.0	0.0	0.0	0.0	1.0	0.0	0.0	1.0	0.0	0.0	0.0	0.0	0.0	0.0
ENSG00000135069	29968	ensembl_gene_id	H. sapiens	29968	H. sapiens	PSAT1	phosphoserine aminotransferase 1	GO:0008615 pyridoxine biosynthetic process;GO:0006564 L-serine biosynthetic process;GO:0008614 pyridoxine metabolic process		Enzymes/ENZYME proteins/Transferases	Cytosol(Enhanced)	Pyridoxal Phosphate (O-phospho-l-serine:2-oxoglutarate aminotransferase activity);L-Glutamic Acid (O-phospho-l-serine:2-oxoglutarate aminotransferase activity)		(M5922)HALLMARK UNFOLDED PROTEIN RESPONSE; (M5924)HALLMARK MTORC1 SIGNALING	0.0	0.0	0.0	0.0	0.0	0.0	0.0	0.0	0.0	0.0	0.0	0.0	0.0	0.0	0.0	0.0	0.0	0.0	0.0	0.0
ENSG00000159023	2035	ensembl_gene_id	H. sapiens	2035	H. sapiens	EPB41	erythrocyte membrane protein band 4.1	GO:1904778 positive regulation of protein localization to cell cortex;GO:1904776 regulation of protein localization to cell cortex;GO:1904478 regulation of intestinal absorption		Transporters/Accessory Factors Involved in Transport	Cell Junctions;Cytosol;Plasma membrane(Supported)		(M240)PID SYNDECAN 2 PATHWAY	(M5893)HALLMARK MITOTIC SPINDLE; (M5945)HALLMARK HEME METABOLISM	0.0	0.0	0.0	0.0	0.0	0.0	0.0	0.0	0.0	0.0	0.0	0.0	0.0	0.0	0.0	0.0	0.0	0.0	0.0	0.0
ENSG00000103942	9455	ensembl_gene_id	H. sapiens	9455	H. sapiens	HOMER2	homer scaffold protein 2	GO:0070885 negative regulation of calcineurin-NFAT signaling cascade;GO:2001256 regulation of store-operated calcium entry;GO:0106057 negative regulation of calcineurin-mediated signaling						(M5908)HALLMARK ANDROGEN RESPONSE; (M5907)HALLMARK ESTROGEN RESPONSE LATE	0.0	0.0	0.0	0.0	0.0	0.0	0.0	0.0	0.0	0.0	0.0	0.0	0.0	1.0	0.0	0.0	0.0	0.0	0.0	0.0
ENSG00000134668	90853	ensembl_gene_id	H. sapiens	90853	H. sapiens	SPOCD1	SPOC domain containing 1	GO:0010923 negative regulation of phosphatase activity;GO:0035305 negative regulation of dephosphorylation;GO:0010921 regulation of phosphatase activity			Cytosol;Nucleoli;Nucleus(Approved)				0.0	0.0	0.0	0.0	0.0	0.0	0.0	0.0	0.0	0.0	0.0	0.0	0.0	1.0	0.0	0.0	0.0	0.0	0.0	0.0
ENSG00000187720	79875	ensembl_gene_id	H. sapiens	79875	H. sapiens	THSD4	thrombospondin type 1 domain containing 4	GO:0048251 elastic fiber assembly;GO:0085029 extracellular matrix assembly;GO:0030198 extracellular matrix organization			Nucleoli;Nucleus(Approved)		(M3008)NABA ECM GLYCOPROTEINS; (M5884)NABA CORE MATRISOME; (M5889)NABA MATRISOME	(M5906)HALLMARK ESTROGEN RESPONSE EARLY	0.0	0.0	0.0	0.0	0.0	0.0	0.0	1.0	0.0	0.0	0.0	0.0	0.0	0.0	0.0	0.0	0.0	0.0	0.0	0.0
ENSG00000078269	8871	ensembl_gene_id	H. sapiens	8871	H. sapiens	SYNJ2	synaptojanin 2	GO:0046855 inositol phosphate dephosphorylation;GO:0071545 inositol phosphate catabolic process;GO:0046856 phosphatidylinositol dephosphorylation		Enzymes/ENZYME proteins/Hydrolases	Cytosol;Microtubules(Approved)			(M5942)HALLMARK UV RESPONSE DN	0.0	0.0	0.0	0.0	0.0	0.0	0.0	0.0	0.0	0.0	0.0	0.0	0.0	0.0	0.0	0.0	0.0	0.0	0.0	0.0
ENSG00000137691	85016	ensembl_gene_id	H. sapiens	85016	H. sapiens	CFAP300	cilia and flagella associated protein 300				Centrosome(Approved)				0.0	0.0	0.0	0.0	0.0	0.0	0.0	0.0	0.0	0.0	0.0	0.0	0.0	0.0	0.0	0.0	0.0	0.0	0.0	0.0
ENSG00000277443	4082	ensembl_gene_id	H. sapiens	4082	H. sapiens	MARCKS	myristoylated alanine rich protein kinase C substrate	GO:0051764 actin crosslink formation;GO:0051017 actin filament bundle assembly;GO:0061572 actin filament bundle organization			Plasma membrane(Supported)Cytosol;Endoplasmic reticulum;Nucleus(Approved)			(M5893)HALLMARK MITOTIC SPINDLE; (M5890)HALLMARK TNFA SIGNALING VIA NFKB; (M5901)HALLMARK G2M CHECKPOINT	0.0	0.0	0.0	0.0	0.0	0.0	0.0	0.0	0.0	0.0	0.0	0.0	0.0	0.0	0.0	0.0	0.0	0.0	0.0	0.0
ENSG00000099625	255057	ensembl_gene_id	H. sapiens	255057	H. sapiens	CBARP	CACN subunit beta associated regulatory protein	GO:1901386 negative regulation of voltage-gated calcium channel activity;GO:0045955 negative regulation of calcium ion-dependent exocytosis;GO:1901020 negative regulation of calcium ion transmembrane transporter activity			Nucleoplasm(Approved)				0.0	0.0	0.0	0.0	0.0	0.0	0.0	0.0	0.0	0.0	0.0	0.0	0.0	0.0	0.0	0.0	0.0	0.0	0.0	0.0
ENSG00000114529	79669	ensembl_gene_id	H. sapiens	79669	H. sapiens	C3orf52	chromosome 3 open reading frame 52								0.0	0.0	0.0	0.0	0.0	0.0	0.0	0.0	0.0	0.0	0.0	0.0	0.0	0.0	0.0	0.0	0.0	0.0	0.0	0.0
ENSG00000179029	84314	ensembl_gene_id	H. sapiens	84314	H. sapiens	TMEM107	transmembrane protein 107	GO:1904491 protein localization to ciliary transition zone;GO:0042733 embryonic digit morphogenesis;GO:0021532 neural tube patterning			Cytosol;Midbody;Midbody ring;Nucleoplasm(Approved)				0.0	0.0	0.0	0.0	0.0	0.0	0.0	0.0	0.0	0.0	0.0	0.0	0.0	0.0	0.0	0.0	0.0	0.0	0.0	0.0
ENSG00000180875	64388	ensembl_gene_id	H. sapiens	64388	H. sapiens	GREM2	gremlin 2, DAN family BMP antagonist	GO:0038098 sequestering of BMP from receptor via BMP binding;GO:0060300 regulation of cytokine activity;GO:0035581 sequestering of extracellular ligand from receptor							0.0	0.0	0.0	0.0	0.0	0.0	0.0	0.0	1.0	0.0	0.0	0.0	0.0	0.0	0.0	0.0	0.0	0.0	0.0	0.0
ENSG00000139211	347902	ensembl_gene_id	H. sapiens	347902	H. sapiens	AMIGO2	adhesion molecule with Ig like domain 2	GO:0007157 heterophilic cell-cell adhesion via plasma membrane cell adhesion molecules;GO:0051965 positive regulation of synapse assembly;GO:0007156 homophilic cell adhesion via plasma membrane adhesion molecules			Cytosol;Golgi apparatus;Plasma membrane(Approved)			(M5915)HALLMARK APICAL JUNCTION	0.0	0.0	0.0	0.0	0.0	0.0	1.0	0.0	0.0	0.0	0.0	0.0	0.0	0.0	0.0	0.0	0.0	0.0	0.0	0.0
ENSG00000133048	1116	ensembl_gene_id	H. sapiens	1116	H. sapiens	CHI3L1	chitinase 3 like 1	GO:0007250 activation of NF-kappaB-inducing kinase activity;GO:0010800 positive regulation of peptidyl-threonine phosphorylation;GO:0006032 chitin catabolic process							0.0	0.0	0.0	1.0	0.0	1.0	0.0	0.0	0.0	0.0	0.0	0.0	1.0	0.0	0.0	0.0	0.0	0.0	1.0	0.0
ENSG00000257093	57189	ensembl_gene_id	H. sapiens	57189	H. sapiens	DENND11	DENN domain containing 11				Golgi apparatus(Approved)				0.0	0.0	0.0	0.0	0.0	0.0	0.0	0.0	0.0	0.0	0.0	0.0	0.0	0.0	0.0	0.0	0.0	0.0	0.0	0.0
ENSG00000174738	9975	ensembl_gene_id	H. sapiens	9975	H. sapiens	NR1D2	nuclear receptor subfamily 1 group D member 2	GO:2001014 regulation of skeletal muscle cell differentiation;GO:0048641 regulation of skeletal muscle tissue development;GO:0035914 skeletal muscle cell differentiation		Nuclear receptors;Transcription factors/Zinc-coordinating DNA-binding domains	Nucleoplasm(Approved)			(M5942)HALLMARK UV RESPONSE DN	0.0	0.0	0.0	0.0	0.0	0.0	0.0	0.0	0.0	1.0	0.0	0.0	0.0	0.0	0.0	0.0	0.0	1.0	0.0	0.0
ENSG00000106688	6505	ensembl_gene_id	H. sapiens	6505	H. sapiens	SLC1A1	solute carrier family 1 member 1	GO:0140009 L-aspartate import across plasma membrane;GO:1903712 cysteine transmembrane transport;GO:0070779 D-aspartate import across plasma membrane		Transporters/Electrochemical Potential-driven transporters		L-Aspartic Acid (Sodium:dicarboxylate symporter activity);L-Glutamic Acid (Sodium:dicarboxylate symporter activity)		(M5906)HALLMARK ESTROGEN RESPONSE EARLY	0.0	0.0	0.0	0.0	0.0	0.0	0.0	0.0	0.0	0.0	0.0	0.0	0.0	0.0	0.0	0.0	0.0	0.0	0.0	0.0
ENSG00000133135	79589	ensembl_gene_id	H. sapiens	79589	H. sapiens	RNF128	ring finger protein 128	GO:1904352 positive regulation of protein catabolic process in the vacuole;GO:1904350 regulation of protein catabolic process in the vacuole;GO:0042036 negative regulation of cytokine biosynthetic process		Enzymes/ENZYME proteins/Transferases			(M60)PID NFAT TFPATHWAY		0.0	0.0	0.0	0.0	0.0	0.0	0.0	0.0	0.0	0.0	0.0	0.0	0.0	0.0	0.0	0.0	0.0	0.0	0.0	0.0
ENSG00000145247	132299	ensembl_gene_id	H. sapiens	132299	H. sapiens	OCIAD2	OCIA domain containing 2	GO:0009617 response to bacterium;GO:0051707 response to other organism;GO:0043207 response to external biotic stimulus			Mitochondria(Enhanced)				0.0	0.0	0.0	0.0	0.0	0.0	0.0	0.0	0.0	0.0	0.0	0.0	0.0	0.0	0.0	0.0	0.0	0.0	0.0	0.0
ENSG00000135842	116496	ensembl_gene_id	H. sapiens	116496	H. sapiens	NIBAN1	niban apoptosis regulator 1	GO:0045727 positive regulation of translation;GO:0001933 negative regulation of protein phosphorylation;GO:0034250 positive regulation of cellular amide metabolic process			Cytosol(Supported)Plasma membrane(Approved)			(M5892)HALLMARK CHOLESTEROL HOMEOSTASIS; (M5924)HALLMARK MTORC1 SIGNALING	0.0	0.0	0.0	0.0	0.0	0.0	0.0	0.0	0.0	0.0	0.0	0.0	0.0	1.0	0.0	0.0	0.0	0.0	0.0	0.0
ENSG00000197457	50861	ensembl_gene_id	H. sapiens	50861	H. sapiens	STMN3	stathmin 3	GO:0035021 negative regulation of Rac protein signal transduction;GO:0001835 blastocyst hatching;GO:0035020 regulation of Rac protein signal transduction							0.0	0.0	0.0	0.0	0.0	0.0	0.0	0.0	0.0	0.0	0.0	0.0	0.0	1.0	0.0	0.0	0.0	0.0	0.0	0.0
ENSG00000132561	4147	ensembl_gene_id	H. sapiens	4147	H. sapiens	MATN2	matrilin 2	GO:0003429 growth plate cartilage chondrocyte morphogenesis;GO:0003414 chondrocyte morphogenesis involved in endochondral bone morphogenesis;GO:0031104 dendrite regeneration					(M3008)NABA ECM GLYCOPROTEINS; (M5884)NABA CORE MATRISOME; (M5889)NABA MATRISOME	(M5930)HALLMARK EPITHELIAL MESENCHYMAL TRANSITION	0.0	1.0	0.0	0.0	0.0	0.0	1.0	1.0	0.0	1.0	0.0	0.0	1.0	0.0	0.0	0.0	0.0	1.0	1.0	0.0
ENSG00000183779	80139	ensembl_gene_id	H. sapiens	80139	H. sapiens	ZNF703	zinc finger protein 703	GO:0033601 positive regulation of mammary gland epithelial cell proliferation;GO:0033599 regulation of mammary gland epithelial cell proliferation;GO:0034111 negative regulation of homotypic cell-cell adhesion							1.0	0.0	1.0	0.0	0.0	0.0	0.0	0.0	1.0	0.0	0.0	0.0	0.0	0.0	0.0	0.0	1.0	0.0	0.0	0.0
ENSG00000145358	115265	ensembl_gene_id	H. sapiens	115265	H. sapiens	DDIT4L	DNA damage inducible transcript 4 like	GO:0009968 negative regulation of signal transduction;GO:0010648 negative regulation of cell communication;GO:0023057 negative regulation of signaling			Actin filaments;Nucleoplasm;Plasma membrane(Uncertain)				0.0	0.0	0.0	0.0	0.0	0.0	0.0	0.0	0.0	0.0	0.0	0.0	0.0	0.0	0.0	0.0	0.0	0.0	0.0	0.0
ENSG00000198113	54863	ensembl_gene_id	H. sapiens	54863	H. sapiens	TOR4A	torsin family 4 member A	GO:0002576 platelet degranulation;GO:0045055 regulated exocytosis;GO:0006887 exocytosis			Nucleoplasm(Approved)				0.0	0.0	0.0	0.0	0.0	0.0	0.0	0.0	0.0	0.0	0.0	0.0	0.0	0.0	0.0	0.0	0.0	0.0	0.0	0.0
ENSG00000144824	90102	ensembl_gene_id	H. sapiens	90102	H. sapiens	PHLDB2	pleckstrin homology like domain family B member 2	GO:1903690 negative regulation of wound healing, spreading of epidermal cells;GO:1903689 regulation of wound healing, spreading of epidermal cells;GO:1904261 positive regulation of basement membrane assembly involved in embryonic body morphogenesis			Cytosol;Plasma membrane(Supported)				0.0	1.0	1.0	0.0	0.0	0.0	0.0	1.0	0.0	1.0	0.0	0.0	0.0	0.0	0.0	0.0	0.0	0.0	0.0	0.0
ENSG00000165714	118426	ensembl_gene_id	H. sapiens	118426	H. sapiens	BORCS5	BLOC-1 related complex subunit 5	GO:1903744 positive regulation of anterograde synaptic vesicle transport;GO:1903742 regulation of anterograde synaptic vesicle transport;GO:1901610 positive regulation of vesicle transport along microtubule			Cytosol(Supported)				1.0	0.0	0.0	0.0	0.0	0.0	0.0	0.0	0.0	0.0	0.0	0.0	0.0	0.0	0.0	0.0	0.0	0.0	0.0	0.0
ENSG00000156011	23362	ensembl_gene_id	H. sapiens	23362	H. sapiens	PSD3	pleckstrin and Sec7 domain containing 3	GO:0032012 regulation of ARF protein signal transduction;GO:0032011 ARF protein signal transduction;GO:0046578 regulation of Ras protein signal transduction			Nucleus;Vesicles(Approved)				0.0	0.0	0.0	0.0	0.0	0.0	0.0	0.0	0.0	0.0	0.0	0.0	0.0	0.0	0.0	0.0	0.0	0.0	0.0	0.0
ENSG00000160888	9592	ensembl_gene_id	H. sapiens	9592	H. sapiens	IER2	immediate early response 2	GO:0071774 response to fibroblast growth factor;GO:0045944 positive regulation of transcription by RNA polymerase II;GO:0045893 positive regulation of transcription, DNA-templated			Nucleoplasm(Enhanced)			(M5890)HALLMARK TNFA SIGNALING VIA NFKB	0.0	0.0	0.0	0.0	0.0	0.0	0.0	0.0	1.0	0.0	0.0	0.0	0.0	0.0	0.0	0.0	0.0	0.0	0.0	0.0
ENSG00000144959	57552	ensembl_gene_id	H. sapiens	57552	H. sapiens	NCEH1	neutral cholesterol ester hydrolase 1	GO:0034383 low-density lipoprotein particle clearance;GO:0034381 plasma lipoprotein particle clearance;GO:0097006 regulation of plasma lipoprotein particle levels			Endoplasmic reticulum(Approved)				0.0	0.0	0.0	0.0	0.0	0.0	0.0	0.0	0.0	0.0	0.0	0.0	0.0	0.0	0.0	0.0	0.0	0.0	0.0	0.0
ENSG00000139278	11010	ensembl_gene_id	H. sapiens	11010	H. sapiens	GLIPR1	GLI pathogenesis related 1	GO:0043312 neutrophil degranulation;GO:0002283 neutrophil activation involved in immune response;GO:0042119 neutrophil activation				SOT-107		(M5930)HALLMARK EPITHELIAL MESENCHYMAL TRANSITION	0.0	0.0	0.0	0.0	0.0	0.0	0.0	0.0	0.0	0.0	0.0	0.0	0.0	0.0	0.0	0.0	0.0	0.0	0.0	0.0
ENSG00000005884	3675	ensembl_gene_id	H. sapiens	3675	H. sapiens	ITGA3	integrin subunit alpha 3	GO:0035024 negative regulation of Rho protein signal transduction;GO:0097062 dendritic spine maintenance;GO:0048333 mesodermal cell differentiation		CD markers	Plasma membrane(Supported)		(M47)PID INTEGRIN CS PATHWAY; (M69)PID REELIN PATHWAY; (M196)PID IL23 PATHWAY	(M5915)HALLMARK APICAL JUNCTION	1.0	1.0	1.0	0.0	0.0	1.0	1.0	1.0	1.0	0.0	0.0	1.0	0.0	1.0	0.0	0.0	1.0	0.0	0.0	0.0
ENSG00000183044	18	ensembl_gene_id	H. sapiens	18	H. sapiens	ABAT	4-aminobutyrate aminotransferase	GO:1904450 positive regulation of aspartate secretion;GO:1904448 regulation of aspartate secretion;GO:0014053 negative regulation of gamma-aminobutyric acid secretion		Enzymes/ENZYME proteins/Transferases	Mitochondria(Supported)	Pyridoxal Phosphate (Succinate-semialdehyde dehydrogenase binding);Pyruvic acid (Succinate-semialdehyde dehydrogenase binding);L-Glutamic Acid (Succinate-semialdehyde dehydrogenase binding);L-Alanine (Succinate-semialdehyde dehydrogenase binding);Valproic Acid (Succinate-semialdehyde dehydrogenase binding);Phenelzine (Succinate-semialdehyde dehydrogenase binding);Vigabatrin (Succinate-semialdehyd…		(M5906)HALLMARK ESTROGEN RESPONSE EARLY; (M5939)HALLMARK P53 PATHWAY	0.0	0.0	1.0	0.0	0.0	0.0	0.0	0.0	0.0	1.0	0.0	0.0	0.0	0.0	0.0	0.0	0.0	0.0	0.0	0.0
ENSG00000118276	9331	ensembl_gene_id	H. sapiens	9331	H. sapiens	B4GALT6	beta-1,4-galactosyltransferase 6	GO:0001572 lactosylceramide biosynthetic process;GO:0010706 ganglioside biosynthetic process via lactosylceramide;GO:0046478 lactosylceramide metabolic process		Enzymes/ENZYME proteins/Transferases					0.0	0.0	0.0	0.0	0.0	0.0	1.0	0.0	0.0	0.0	0.0	0.0	0.0	0.0	0.0	0.0	0.0	0.0	0.0	0.0
ENSG00000138675	2250	ensembl_gene_id	H. sapiens	2250	H. sapiens	FGF5	fibroblast growth factor 5	GO:0023019 signal transduction involved in regulation of gene expression;GO:0008543 fibroblast growth factor receptor signaling pathway;GO:0051897 positive regulation of protein kinase B signaling		RAS pathway related proteins	Nucleoli fibrillar center;Nucleus(Supported)Cytosol(Approved)		(M5883)NABA SECRETED FACTORS; (M5885)NABA MATRISOME ASSOCIATED; (M5889)NABA MATRISOME		0.0	0.0	0.0	0.0	0.0	0.0	0.0	0.0	1.0	0.0	0.0	1.0	0.0	0.0	1.0	0.0	0.0	0.0	0.0	0.0
ENSG00000121236	117854	ensembl_gene_id	H. sapiens	117854	H. sapiens	TRIM6	tripartite motif containing 6	GO:0002741 positive regulation of cytokine secretion involved in immune response;GO:0060340 positive regulation of type I interferon-mediated signaling pathway;GO:0002739 regulation of cytokine secretion involved in immune response		Enzymes/ENZYME proteins/Transferases					0.0	0.0	0.0	0.0	0.0	0.0	0.0	0.0	0.0	0.0	0.0	0.0	0.0	0.0	0.0	0.0	0.0	0.0	0.0	0.0
ENSG00000130176	1264	ensembl_gene_id	H. sapiens	1264	H. sapiens	CNN1	calponin 1	GO:1904706 negative regulation of vascular smooth muscle cell proliferation;GO:1904705 regulation of vascular smooth muscle cell proliferation;GO:0048662 negative regulation of smooth muscle cell proliferation			Actin filaments(Approved)				0.0	0.0	0.0	0.0	0.0	0.0	0.0	0.0	0.0	0.0	1.0	0.0	0.0	0.0	0.0	0.0	0.0	0.0	0.0	0.0
ENSG00000138134	57559	ensembl_gene_id	H. sapiens	57559	H. sapiens	STAMBPL1	STAM binding protein like 1	GO:0070536 protein K63-linked deubiquitination;GO:0016579 protein deubiquitination;GO:0070646 protein modification by small protein removal		Enzymes/Peptidases/Metallopeptidases	Plasma membrane(Approved)				0.0	0.0	0.0	0.0	0.0	0.0	0.0	0.0	0.0	0.0	0.0	0.0	0.0	0.0	0.0	0.0	0.0	0.0	0.0	0.0
ENSG00000161958	2256	ensembl_gene_id	H. sapiens	2256	H. sapiens	FGF11	fibroblast growth factor 11	GO:0007267 cell-cell signaling;GO:0007399 nervous system development;GO:0048731 system development		RAS pathway related proteins	Centrosome(Approved)		(M5883)NABA SECRETED FACTORS; (M5885)NABA MATRISOME ASSOCIATED; (M5889)NABA MATRISOME		0.0	0.0	0.0	0.0	0.0	0.0	0.0	0.0	0.0	0.0	0.0	0.0	0.0	0.0	1.0	0.0	0.0	0.0	0.0	0.0
ENSG00000182134	11022	ensembl_gene_id	H. sapiens	11022	H. sapiens	TDRKH	tudor and KH domain containing	GO:0043046 DNA methylation involved in gamete generation;GO:0034587 piRNA metabolic process;GO:0007140 male meiotic nuclear division			Centrosome;Cytosol(Approved)				0.0	0.0	0.0	0.0	0.0	0.0	0.0	0.0	0.0	0.0	0.0	0.0	0.0	0.0	0.0	0.0	0.0	0.0	0.0	0.0
ENSG00000006468	2115	ensembl_gene_id	H. sapiens	2115	H. sapiens	ETV1	ETS variant transcription factor 1	GO:0048935 peripheral nervous system neuron development;GO:0048934 peripheral nervous system neuron differentiation;GO:0007638 mechanosensory behavior		Transcription factors/Helix-turn-helix domains	Nucleoplasm(Approved)		(M199)PID P38 MK2 PATHWAY	(M5953)HALLMARK KRAS SIGNALING UP	0.0	0.0	0.0	0.0	0.0	0.0	1.0	0.0	0.0	0.0	0.0	0.0	0.0	0.0	0.0	0.0	0.0	1.0	0.0	0.0
ENSG00000136383	57538	ensembl_gene_id	H. sapiens	57538	H. sapiens	ALPK3	alpha kinase 3	GO:0055013 cardiac muscle cell development;GO:0055006 cardiac cell development;GO:0055007 cardiac muscle cell differentiation	Atypical: Alpha-type protein kinase family	Enzymes/Kinases/Atypical kinases	Nucleus(Approved)				0.0	0.0	0.0	0.0	0.0	0.0	0.0	0.0	0.0	0.0	0.0	0.0	0.0	0.0	0.0	0.0	0.0	1.0	0.0	0.0
ENSG00000088826	54498	ensembl_gene_id	H. sapiens	54498	H. sapiens	SMOX	spermine oxidase	GO:0046208 spermine catabolic process;GO:0006598 polyamine catabolic process;GO:0008215 spermine metabolic process		Enzymes/ENZYME proteins/Oxidoreductases	Nuclear membrane;Nucleoplasm(Supported)Vesicles(Approved)	Spermine (Spermine:oxygen oxidoreductase (spermidine-forming) activity)		(M5945)HALLMARK HEME METABOLISM; (M5934)HALLMARK XENOBIOTIC METABOLISM	0.0	0.0	0.0	0.0	0.0	0.0	0.0	0.0	0.0	0.0	0.0	0.0	0.0	0.0	0.0	0.0	0.0	0.0	0.0	0.0
ENSG00000154553	27295	ensembl_gene_id	H. sapiens	27295	H. sapiens	PDLIM3	PDZ and LIM domain 3	GO:0007015 actin filament organization;GO:0007507 heart development;GO:0030036 actin cytoskeleton organization						(M5941)HALLMARK UV RESPONSE UP; (M5906)HALLMARK ESTROGEN RESPONSE EARLY; (M5907)HALLMARK ESTROGEN RESPONSE LATE	0.0	0.0	0.0	0.0	0.0	0.0	0.0	0.0	0.0	0.0	0.0	0.0	0.0	0.0	0.0	0.0	0.0	1.0	0.0	0.0
ENSG00000069020	375449	ensembl_gene_id	H. sapiens	375449	H. sapiens	MAST4	microtubule associated serine/threonine kinase family member 4	GO:0018105 peptidyl-serine phosphorylation;GO:0018209 peptidyl-serine modification;GO:0018193 peptidyl-amino acid modification	AGC Ser/Thr protein kinase family	Enzymes/{ENZYME proteins/Transferases,Kinases/AGC Ser/Thr protein kinases}	Cytosol;Nucleoplasm(Approved)			(M5906)HALLMARK ESTROGEN RESPONSE EARLY	0.0	0.0	0.0	0.0	0.0	0.0	0.0	0.0	0.0	0.0	0.0	0.0	0.0	0.0	0.0	0.0	0.0	0.0	0.0	0.0
ENSG00000133657	79572	ensembl_gene_id	H. sapiens	79572	H. sapiens	ATP13A3	ATPase 13A3	GO:0006874 cellular calcium ion homeostasis;GO:0055074 calcium ion homeostasis;GO:0072503 cellular divalent inorganic cation homeostasis			Cytosol;Nucleoli;Plasma membrane(Approved)				0.0	0.0	0.0	0.0	0.0	0.0	0.0	0.0	0.0	0.0	0.0	0.0	0.0	0.0	0.0	0.0	0.0	0.0	0.0	0.0
ENSG00000181873	200205	ensembl_gene_id	H. sapiens	200205	H. sapiens	IBA57	iron-sulfur cluster assembly factor IBA57	GO:0006783 heme biosynthetic process;GO:0042168 heme metabolic process;GO:0006779 porphyrin-containing compound biosynthetic process			Mitochondria(Supported)				0.0	0.0	0.0	0.0	0.0	0.0	0.0	0.0	0.0	0.0	0.0	0.0	0.0	0.0	0.0	0.0	0.0	0.0	0.0	0.0
ENSG00000168077	51435	ensembl_gene_id	H. sapiens	51435	H. sapiens	SCARA3	scavenger receptor class A member 3	GO:0003429 growth plate cartilage chondrocyte morphogenesis;GO:0003414 chondrocyte morphogenesis involved in endochondral bone morphogenesis;GO:0034138 toll-like receptor 3 signaling pathway			Endoplasmic reticulum(Supported)				0.0	1.0	0.0	0.0	0.0	0.0	1.0	0.0	0.0	0.0	0.0	0.0	1.0	0.0	0.0	0.0	0.0	1.0	1.0	0.0
ENSG00000167703	124935	ensembl_gene_id	H. sapiens	124935	H. sapiens	SLC43A2	solute carrier family 43 member 2	GO:1902475 L-alpha-amino acid transmembrane transport;GO:0015804 neutral amino acid transport;GO:0015807 L-amino acid transport		Transporters/Electrochemical Potential-driven transporters					0.0	0.0	0.0	0.0	0.0	0.0	0.0	0.0	0.0	0.0	0.0	0.0	0.0	0.0	0.0	0.0	0.0	0.0	0.0	0.0
ENSG00000128965	79094	ensembl_gene_id	H. sapiens	79094	H. sapiens	CHAC1	ChaC glutathione specific gamma-glutamylcyclotransferase 1	GO:0006750 glutathione biosynthetic process;GO:0006751 glutathione catabolic process;GO:0010955 negative regulation of protein processing						(M5922)HALLMARK UNFOLDED PROTEIN RESPONSE	0.0	0.0	0.0	0.0	0.0	0.0	0.0	0.0	0.0	0.0	0.0	0.0	0.0	0.0	0.0	0.0	0.0	0.0	0.0	0.0
ENSG00000106070	2887	ensembl_gene_id	H. sapiens	2887	H. sapiens	GRB10	growth factor receptor bound protein 10	GO:0046325 negative regulation of glucose import;GO:0010829 negative regulation of glucose transmembrane transport;GO:0046627 negative regulation of insulin receptor signaling pathway			Vesicles(Supported)		(M125)PID IGF1 PATHWAY; (M82)PID RET PATHWAY; (M16)PID INSULIN PATHWAY		0.0	0.0	0.0	0.0	0.0	0.0	1.0	0.0	1.0	0.0	0.0	1.0	0.0	0.0	0.0	0.0	0.0	0.0	0.0	0.0
ENSG00000166228	5092	ensembl_gene_id	H. sapiens	5092	H. sapiens	PCBD1	pterin-4 alpha-carbinolamine dehydratase 1	GO:0006559 L-phenylalanine catabolic process;GO:0006729 tetrahydrobiopterin biosynthetic process;GO:1902222 erythrose 4-phosphate/phosphoenolpyruvate family amino acid catabolic process		Enzymes/ENZYME proteins/Lyases	Cytosol;Nucleoplasm(Enhanced)	7,8-Dihydrobiopterin (Transcription coactivator activity)		(M5935)HALLMARK FATTY ACID METABOLISM	0.0	0.0	0.0	0.0	0.0	0.0	0.0	0.0	0.0	0.0	0.0	0.0	0.0	0.0	0.0	0.0	0.0	0.0	0.0	0.0
ENSG00000204219	6920	ensembl_gene_id	H. sapiens	6920	H. sapiens	TCEA3	transcription elongation factor A3	GO:0006355 regulation of transcription, DNA-templated;GO:1903506 regulation of nucleic acid-templated transcription;GO:0006351 transcription, DNA-templated			Nucleoplasm;Vesicles(Approved)				0.0	0.0	0.0	0.0	0.0	0.0	0.0	0.0	0.0	0.0	0.0	0.0	0.0	0.0	0.0	0.0	0.0	0.0	0.0	0.0
ENSG00000128591	2318	ensembl_gene_id	H. sapiens	2318	H. sapiens	FLNC	filamin C	GO:0048747 muscle fiber development;GO:0055002 striated muscle cell development;GO:0055001 muscle cell development		Transporters/Accessory Factors Involved in Transport	Cytosol;Plasma membrane(Supported)		(M16801)SIG REGULATION OF THE ACTIN CYTOSKELETON BY RHO GTPASES	(M5915)HALLMARK APICAL JUNCTION	0.0	0.0	0.0	0.0	0.0	0.0	0.0	0.0	0.0	0.0	0.0	0.0	0.0	0.0	0.0	0.0	0.0	1.0	0.0	0.0
ENSG00000169047	3667	ensembl_gene_id	H. sapiens	3667	H. sapiens	IRS1	insulin receptor substrate 1	GO:0032000 positive regulation of fatty acid beta-oxidation;GO:0045725 positive regulation of glycogen biosynthetic process;GO:0046326 positive regulation of glucose import			Cytosol;Nucleoplasm;Plasma membrane(Supported)	[4-({5-(AMINOCARBONYL)-4-[(3-METHYLPHENYL)AMINO]PYRIMIDIN-2-YL}AMINO)PHENYL]ACETIC ACID (Transmembrane receptor protein tyrosine kinase adaptor activity)	(M268)PID S1P S1P2 PATHWAY; (M1718)SIG IL4RECEPTOR IN B LYPHOCYTES; (M125)PID IGF1 PATHWAY	(M5942)HALLMARK UV RESPONSE DN; (M5915)HALLMARK APICAL JUNCTION	0.0	0.0	0.0	1.0	0.0	0.0	0.0	0.0	0.0	0.0	0.0	1.0	0.0	0.0	0.0	0.0	0.0	0.0	0.0	0.0
ENSG00000182022	51363	ensembl_gene_id	H. sapiens	51363	H. sapiens	CHST15	carbohydrate sulfotransferase 15	GO:0030206 chondroitin sulfate biosynthetic process;GO:0030204 chondroitin sulfate metabolic process;GO:0050650 chondroitin sulfate proteoglycan biosynthetic process		Enzymes/ENZYME proteins/Transferases	Centrosome;Cytosol(Approved)				0.0	0.0	0.0	0.0	0.0	0.0	0.0	0.0	0.0	0.0	0.0	0.0	0.0	0.0	0.0	0.0	0.0	0.0	0.0	0.0
ENSG00000182612	83882	ensembl_gene_id	H. sapiens	83882	H. sapiens	TSPAN10	tetraspanin 10	GO:0072594 establishment of protein localization to organelle;GO:0033365 protein localization to organelle;GO:0034613 cellular protein localization							0.0	0.0	0.0	0.0	0.0	0.0	0.0	0.0	0.0	0.0	0.0	0.0	0.0	0.0	0.0	0.0	0.0	0.0	0.0	0.0
ENSG00000184949	646851	ensembl_gene_id	H. sapiens	646851	H. sapiens	FAM227A	family with sequence similarity 227 member A				Nucleoplasm(Uncertain)				0.0	0.0	0.0	0.0	0.0	0.0	0.0	0.0	0.0	0.0	0.0	0.0	0.0	0.0	0.0	0.0	0.0	0.0	0.0	0.0
ENSG00000128165	79924	ensembl_gene_id	H. sapiens	79924	H. sapiens	ADM2	adrenomedullin 2	GO:0045766 positive regulation of angiogenesis;GO:0045776 negative regulation of blood pressure;GO:0045765 regulation of angiogenesis							0.0	0.0	0.0	0.0	0.0	1.0	0.0	0.0	0.0	0.0	0.0	0.0	0.0	0.0	0.0	0.0	0.0	0.0	0.0	0.0
ENSG00000175087	149420	ensembl_gene_id	H. sapiens	149420	H. sapiens	PDIK1L	PDLIM1 interacting kinase 1 like	GO:0006468 protein phosphorylation;GO:0016310 phosphorylation;GO:0006796 phosphate-containing compound metabolic process	Other	Enzymes/{ENZYME proteins/Transferases,Kinases}	Nucleoplasm(Supported)				0.0	0.0	0.0	0.0	0.0	0.0	0.0	0.0	0.0	0.0	0.0	0.0	0.0	0.0	0.0	0.0	0.0	0.0	0.0	0.0
ENSG00000174136	285704	ensembl_gene_id	H. sapiens	285704	H. sapiens	RGMB	repulsive guidance molecule BMP co-receptor b	GO:0030509 BMP signaling pathway;GO:0071773 cellular response to BMP stimulus;GO:0071772 response to BMP			Nucleoplasm(Approved)		(M181)PID BMP PATHWAY		0.0	0.0	0.0	0.0	0.0	0.0	0.0	0.0	1.0	0.0	0.0	0.0	0.0	0.0	0.0	0.0	0.0	0.0	0.0	0.0
ENSG00000185420	64754	ensembl_gene_id	H. sapiens	64754	H. sapiens	SMYD3	SET and MYND domain containing 3	GO:0071549 cellular response to dexamethasone stimulus;GO:0071548 response to dexamethasone;GO:0071385 cellular response to glucocorticoid stimulus		Enzymes/ENZYME proteins/Transferases	Cytosol;Nucleoplasm(Approved)				0.0	0.0	0.0	0.0	0.0	0.0	0.0	0.0	0.0	0.0	0.0	0.0	0.0	1.0	0.0	0.0	0.0	1.0	0.0	0.0
ENSG00000128578	57464	ensembl_gene_id	H. sapiens	57464	H. sapiens	STRIP2	striatin interacting protein 2	GO:0008360 regulation of cell shape;GO:0022604 regulation of cell morphogenesis;GO:0000902 cell morphogenesis			Cytosol(Supported)				0.0	0.0	0.0	0.0	0.0	0.0	0.0	0.0	0.0	0.0	0.0	0.0	0.0	0.0	0.0	0.0	0.0	0.0	0.0	0.0
ENSG00000095383	55357	ensembl_gene_id	H. sapiens	55357	H. sapiens	TBC1D2	TBC1 domain family member 2	GO:1902017 regulation of cilium assembly;GO:0090630 activation of GTPase activity;GO:0120032 regulation of plasma membrane bounded cell projection assembly			Cytosol;Nucleus(Approved)				0.0	0.0	0.0	0.0	0.0	0.0	1.0	0.0	0.0	0.0	0.0	0.0	0.0	0.0	0.0	0.0	0.0	0.0	0.0	0.0
ENSG00000134780	747	ensembl_gene_id	H. sapiens	747	H. sapiens	DAGLA	diacylglycerol lipase alpha	GO:0046340 diacylglycerol catabolic process;GO:0098921 retrograde trans-synaptic signaling by endocannabinoid;GO:0098920 retrograde trans-synaptic signaling by lipid					(M266)PID NCADHERIN PATHWAY		0.0	0.0	0.0	0.0	0.0	0.0	0.0	0.0	0.0	0.0	0.0	0.0	0.0	0.0	0.0	0.0	0.0	0.0	0.0	0.0
ENSG00000143067	90874	ensembl_gene_id	H. sapiens	90874	H. sapiens	ZNF697	zinc finger protein 697	GO:0008150 biological_process		Transcription factors/Zinc-coordinating DNA-binding domains	Nucleoplasm(Approved)				0.0	0.0	0.0	0.0	0.0	0.0	0.0	0.0	0.0	0.0	0.0	0.0	0.0	0.0	0.0	0.0	0.0	0.0	0.0	0.0
ENSG00000117152	5999	ensembl_gene_id	H. sapiens	5999	H. sapiens	RGS4	regulator of G protein signaling 4	GO:1900924 negative regulation of glycine import across plasma membrane;GO:1900923 regulation of glycine import across plasma membrane;GO:0061052 negative regulation of cell growth involved in cardiac muscle cell development			Intermediate filaments(Approved)			(M5942)HALLMARK UV RESPONSE DN; (M5930)HALLMARK EPITHELIAL MESENCHYMAL TRANSITION	0.0	0.0	0.0	1.0	0.0	0.0	1.0	0.0	0.0	0.0	0.0	0.0	0.0	1.0	0.0	0.0	0.0	1.0	0.0	0.0
ENSG00000103257	8140	ensembl_gene_id	H. sapiens	8140	H. sapiens	SLC7A5	solute carrier family 7 member 5	GO:1904556 L-tryptophan transmembrane transport;GO:0015827 tryptophan transport;GO:0015803 branched-chain amino acid transport		Transporters/Electrochemical Potential-driven transporters	Cytosol;Plasma membrane(Supported)Vesicles(Approved)			(M5922)HALLMARK UNFOLDED PROTEIN RESPONSE; (M5901)HALLMARK G2M CHECKPOINT; (M5924)HALLMARK MTORC1 SIGNALING	0.0	0.0	0.0	0.0	0.0	0.0	0.0	0.0	0.0	0.0	0.0	0.0	0.0	0.0	0.0	0.0	0.0	0.0	0.0	0.0
ENSG00000175182	131408	ensembl_gene_id	H. sapiens	131408	H. sapiens	FAM131A	family with sequence similarity 131 member A				Nucleoli;Nucleus(Approved)				0.0	0.0	0.0	0.0	0.0	0.0	0.0	0.0	0.0	0.0	0.0	0.0	0.0	0.0	0.0	0.0	0.0	0.0	0.0	0.0
ENSG00000197646	80380	ensembl_gene_id	H. sapiens	80380	H. sapiens	PDCD1LG2	programmed cell death 1 ligand 2	GO:0046007 negative regulation of activated T cell proliferation;GO:0031295 T cell costimulation;GO:0046006 regulation of activated T cell proliferation		CD markers	Cytosol(Approved)			(M5953)HALLMARK KRAS SIGNALING UP	0.0	0.0	1.0	0.0	0.0	0.0	0.0	0.0	0.0	0.0	1.0	0.0	0.0	0.0	0.0	0.0	0.0	0.0	0.0	0.0
ENSG00000171680	57449	ensembl_gene_id	H. sapiens	57449	H. sapiens	PLEKHG5	pleckstrin homology and RhoGEF domain containing G5	GO:0099575 regulation of protein catabolic process at presynapse, modulating synaptic transmission;GO:0099171 presynaptic modulation of chemical synaptic transmission;GO:0035767 endothelial cell chemotaxis			Nucleus(Approved)				0.0	0.0	0.0	0.0	0.0	1.0	1.0	0.0	0.0	0.0	0.0	0.0	0.0	0.0	0.0	1.0	0.0	0.0	0.0	0.0
ENSG00000157168	3084	ensembl_gene_id	H. sapiens	3084	H. sapiens	NRG1	neuregulin 1	GO:0021842 chemorepulsion involved in interneuron migration from the subpallium to the cortex;GO:0021840 directional guidance of interneurons involved in migration from the subpallium to the cortex;GO:0021830 interneuron migration from the subpallium to the cortex			Nucleoplasm(Approved)		(M201)PID ERBB NETWORK PATHWAY; (M33)PID GLYPICAN 1PATHWAY; (M13)PID ERBB4 PATHWAY		0.0	1.0	0.0	1.0	0.0	0.0	1.0	0.0	0.0	1.0	0.0	1.0	0.0	0.0	1.0	0.0	1.0	1.0	0.0	0.0
ENSG00000138623	8482	ensembl_gene_id	H. sapiens	8482	H. sapiens	SEMA7A	semaphorin 7A (John Milton Hagen blood group)	GO:0048843 negative regulation of axon extension involved in axon guidance;GO:0060907 positive regulation of macrophage cytokine production;GO:0048841 regulation of axon extension involved in axon guidance		Blood group antigen proteins;CD markers	Vesicles(Uncertain)		(M5880)NABA ECM AFFILIATED; (M5885)NABA MATRISOME ASSOCIATED; (M5889)NABA MATRISOME		1.0	0.0	0.0	1.0	1.0	1.0	1.0	0.0	0.0	1.0	0.0	0.0	0.0	0.0	1.0	0.0	0.0	0.0	0.0	0.0
ENSG00000198478	83699	ensembl_gene_id	H. sapiens	83699	H. sapiens	SH3BGRL2	SH3 domain binding glutamate rich protein like 2				Nucleoplasm(Supported)			(M5947)HALLMARK IL2 STAT5 SIGNALING	0.0	0.0	0.0	0.0	0.0	0.0	0.0	0.0	0.0	0.0	0.0	0.0	0.0	0.0	0.0	0.0	0.0	0.0	0.0	0.0
ENSG00000225968	392617	ensembl_gene_id	H. sapiens	392617	H. sapiens	ELFN1	extracellular leucine rich repeat and fibronectin type III domain containing 1	GO:0032515 negative regulation of phosphoprotein phosphatase activity;GO:0035308 negative regulation of protein dephosphorylation;GO:0010923 negative regulation of phosphatase activity			Cell Junctions;Nucleoplasm(Approved)		(M5880)NABA ECM AFFILIATED; (M5885)NABA MATRISOME ASSOCIATED; (M5889)NABA MATRISOME		0.0	0.0	0.0	0.0	0.0	0.0	0.0	0.0	0.0	0.0	0.0	0.0	0.0	1.0	1.0	0.0	0.0	0.0	0.0	0.0
ENSG00000091409	3655	ensembl_gene_id	H. sapiens	3655	H. sapiens	ITGA6	integrin subunit alpha 6	GO:0031581 hemidesmosome assembly;GO:0035878 nail development;GO:0010668 ectodermal cell differentiation		CD markers;Transporters/Accessory Factors Involved in Transport			(M158)PID INTEGRIN4 PATHWAY; (M47)PID INTEGRIN CS PATHWAY; (M239)PID A6B1 A6B4 INTEGRIN PATHWAY	(M5947)HALLMARK IL2 STAT5 SIGNALING	1.0	0.0	1.0	0.0	0.0	0.0	1.0	1.0	0.0	0.0	0.0	0.0	0.0	0.0	0.0	1.0	1.0	0.0	0.0	0.0
ENSG00000178038	259173	ensembl_gene_id	H. sapiens	259173	H. sapiens	ALS2CL	ALS2 C-terminal like	GO:0007032 endosome organization;GO:0043547 positive regulation of GTPase activity;GO:0043087 regulation of GTPase activity							0.0	0.0	0.0	0.0	0.0	0.0	0.0	0.0	0.0	0.0	0.0	0.0	0.0	0.0	0.0	0.0	0.0	0.0	0.0	0.0
ENSG00000256671	100288695	ensembl_gene_id	H. sapiens	100288695	H. sapiens	LIMS4	LIM zinc finger domain containing 4								0.0	0.0	0.0	0.0	0.0	0.0	0.0	0.0	0.0	0.0	0.0	0.0	0.0	0.0	0.0	0.0	0.0	0.0	0.0	0.0
ENSG00000138131	84171	ensembl_gene_id	H. sapiens	84171	H. sapiens	LOXL4	lysyl oxidase like 4	GO:0018057 peptidyl-lysine oxidation;GO:0018158 protein oxidation;GO:0030199 collagen fibril organization			Vesicles(Approved)		(M3468)NABA ECM REGULATORS; (M5885)NABA MATRISOME ASSOCIATED; (M5889)NABA MATRISOME		0.0	0.0	0.0	0.0	0.0	0.0	0.0	1.0	0.0	0.0	0.0	0.0	0.0	0.0	1.0	0.0	0.0	0.0	0.0	0.0
ENSG00000172061	131578	ensembl_gene_id	H. sapiens	131578	H. sapiens	LRRC15	leucine rich repeat containing 15	GO:0046813 receptor-mediated virion attachment to host cell;GO:0019062 virion attachment to host cell;GO:0044650 adhesion of symbiont to host cell			Plasma membrane;Vesicles(Approved)			(M5930)HALLMARK EPITHELIAL MESENCHYMAL TRANSITION	1.0	0.0	0.0	0.0	0.0	0.0	0.0	0.0	0.0	0.0	0.0	0.0	0.0	0.0	0.0	0.0	0.0	0.0	0.0	0.0
ENSG00000079257	56925	ensembl_gene_id	H. sapiens	56925	H. sapiens	LXN	latexin	GO:0050965 detection of temperature stimulus involved in sensory perception of pain;GO:0050961 detection of temperature stimulus involved in sensory perception;GO:0016048 detection of temperature stimulus			Cytosol;Nucleoplasm(Approved)			(M5891)HALLMARK HYPOXIA	0.0	0.0	0.0	0.0	0.0	0.0	0.0	0.0	0.0	0.0	0.0	0.0	0.0	0.0	0.0	0.0	0.0	0.0	0.0	0.0
ENSG00000169991	126917	ensembl_gene_id	H. sapiens	126917	H. sapiens	IFFO2	intermediate filament family orphan 2				Nucleoplasm;Plasma membrane(Approved)				0.0	0.0	0.0	0.0	0.0	0.0	0.0	0.0	0.0	0.0	0.0	0.0	0.0	0.0	0.0	0.0	0.0	0.0	0.0	0.0
ENSG00000165171	155368	ensembl_gene_id	H. sapiens	155368	H. sapiens	METTL27	methyltransferase like 27				Focal adhesion sites(Supported)				0.0	0.0	0.0	0.0	0.0	0.0	0.0	0.0	0.0	0.0	0.0	0.0	0.0	0.0	0.0	0.0	0.0	0.0	0.0	0.0
ENSG00000081189	4208	ensembl_gene_id	H. sapiens	4208	H. sapiens	MEF2C	myocyte enhancer factor 2C	GO:0003185 sinoatrial valve morphogenesis;GO:0090073 positive regulation of protein homodimerization activity;GO:2000111 positive regulation of macrophage apoptotic process		Transcription factors	Vesicles(Supported)Nucleoplasm(Approved)		(M270)PID MAPK TRK PATHWAY; (M30)PID HDAC CLASSII PATHWAY; (M229)PID P38 ALPHA BETA DOWNSTREAM PATHWAY	(M5909)HALLMARK MYOGENESIS	0.0	1.0	1.0	0.0	1.0	1.0	1.0	0.0	1.0	0.0	1.0	1.0	1.0	0.0	0.0	1.0	1.0	1.0	1.0	0.0
ENSG00000050405	51474	ensembl_gene_id	H. sapiens	51474	H. sapiens	LIMA1	LIM domain and actin binding 1	GO:0030299 intestinal cholesterol absorption;GO:0030835 negative regulation of actin filament depolymerization;GO:0098856 intestinal lipid absorption			Actin filaments;Cytosol;Focal adhesion sites;Plasma membrane(Enhanced)		(M232)PID ECADHERIN STABILIZATION PATHWAY	(M5915)HALLMARK APICAL JUNCTION	0.0	0.0	0.0	0.0	0.0	0.0	1.0	0.0	0.0	0.0	0.0	0.0	0.0	0.0	0.0	0.0	0.0	0.0	0.0	0.0
ENSG00000170667	100271927	ensembl_gene_id	H. sapiens	100271927	H. sapiens	RASA4B	RAS p21 protein activator 4B	GO:0046580 negative regulation of Ras protein signal transduction;GO:0051058 negative regulation of small GTPase mediated signal transduction;GO:0071277 cellular response to calcium ion		RAS pathway related proteins	Cell Junctions;Vesicles(Uncertain)				0.0	0.0	0.0	0.0	0.0	0.0	0.0	0.0	0.0	0.0	0.0	0.0	0.0	1.0	0.0	0.0	0.0	0.0	0.0	0.0
ENSG00000132688	10763	ensembl_gene_id	H. sapiens	10763	H. sapiens	NES	nestin	GO:0030844 positive regulation of intermediate filament depolymerization;GO:0030842 regulation of intermediate filament depolymerization;GO:0045106 intermediate filament depolymerization			Intermediate filaments(Enhanced)				0.0	0.0	0.0	0.0	0.0	0.0	1.0	0.0	0.0	0.0	0.0	0.0	0.0	0.0	0.0	0.0	0.0	0.0	0.0	0.0
ENSG00000165029	19	ensembl_gene_id	H. sapiens	19	H. sapiens	ABCA1	ATP binding cassette subfamily A member 1	GO:0090108 positive regulation of high-density lipoprotein particle assembly;GO:0090107 regulation of high-density lipoprotein particle assembly;GO:0010875 positive regulation of cholesterol efflux		Transporters/Primary Active Transporters	Nucleoplasm;Vesicles(Approved)	Adenosine triphosphate (Syntaxin binding);Glyburide (Syntaxin binding);Probucol (Syntaxin binding)	(M162)PID RXR VDR PATHWAY	(M5910)HALLMARK PROTEIN SECRETION; (M5948)HALLMARK BILE ACID METABOLISM; (M5932)HALLMARK INFLAMMATORY RESPONSE	0.0	0.0	0.0	0.0	0.0	0.0	0.0	1.0	0.0	0.0	0.0	0.0	0.0	0.0	0.0	0.0	0.0	0.0	0.0	0.0
ENSG00000038427	1462	ensembl_gene_id	H. sapiens	1462	H. sapiens	VCAN	versican	GO:0030208 dermatan sulfate biosynthetic process;GO:0030207 chondroitin sulfate catabolic process;GO:0030205 dermatan sulfate metabolic process			Vesicles(Supported)	Hyaluronic acid (Hyaluronic acid binding)	(M264)PID TOLL ENDOGENOUS PATHWAY; (M5882)NABA PROTEOGLYCANS; (M223)PID BETA CATENIN NUC PATHWAY	(M5944)HALLMARK ANGIOGENESIS; (M5937)HALLMARK GLYCOLYSIS; (M5915)HALLMARK APICAL JUNCTION	0.0	0.0	0.0	0.0	1.0	0.0	0.0	1.0	0.0	0.0	0.0	0.0	1.0	0.0	0.0	0.0	0.0	0.0	0.0	0.0
ENSG00000119862	29094	ensembl_gene_id	H. sapiens	29094	H. sapiens	LGALSL	galectin like				Nucleoplasm(Approved)		(M5880)NABA ECM AFFILIATED; (M5885)NABA MATRISOME ASSOCIATED; (M5889)NABA MATRISOME		0.0	0.0	0.0	0.0	0.0	0.0	0.0	0.0	0.0	0.0	0.0	0.0	0.0	0.0	1.0	0.0	0.0	0.0	0.0	0.0
ENSG00000067798	89795	ensembl_gene_id	H. sapiens	89795	H. sapiens	NAV3	neuron navigator 3	GO:1905929 positive regulation of invadopodium disassembly;GO:1905927 regulation of invadopodium disassembly;GO:1905878 invadopodium disassembly			Cytosol;Nuclear membrane(Approved)				0.0	0.0	0.0	0.0	0.0	0.0	1.0	0.0	0.0	0.0	0.0	0.0	0.0	0.0	0.0	0.0	0.0	0.0	0.0	0.0
ENSG00000142910	64129	ensembl_gene_id	H. sapiens	64129	H. sapiens	TINAGL1	tubulointerstitial nephritis antigen like 1	GO:0016197 endosomal transport;GO:0046907 intracellular transport;GO:0016192 vesicle-mediated transport		Enzymes/Peptidases/Cysteine-type peptidases			(M3008)NABA ECM GLYCOPROTEINS; (M5884)NABA CORE MATRISOME; (M5889)NABA MATRISOME		0.0	0.0	0.0	0.0	0.0	0.0	0.0	1.0	0.0	0.0	0.0	0.0	0.0	0.0	0.0	0.0	0.0	0.0	0.0	0.0
ENSG00000029153	56938	ensembl_gene_id	H. sapiens	56938	H. sapiens	ARNTL2	aryl hydrocarbon receptor nuclear translocator like 2	GO:0042753 positive regulation of circadian rhythm;GO:0009649 entrainment of circadian clock;GO:0042752 regulation of circadian rhythm		Transcription factors/Basic domains	Nucleoli;Nucleus(Enhanced)				0.0	0.0	0.0	0.0	0.0	0.0	0.0	0.0	0.0	0.0	0.0	0.0	0.0	0.0	0.0	0.0	0.0	0.0	0.0	0.0
ENSG00000163689	200844	ensembl_gene_id	H. sapiens	200844	H. sapiens	CFAP20DC	CFAP20 domain containing				Golgi apparatus(Approved)				0.0	0.0	0.0	0.0	0.0	0.0	0.0	0.0	0.0	0.0	0.0	0.0	0.0	0.0	0.0	0.0	0.0	0.0	0.0	0.0
ENSG00000156299	7074	ensembl_gene_id	H. sapiens	7074	H. sapiens	TIAM1	TIAM Rac1 associated GEF 1	GO:1904268 positive regulation of Schwann cell chemotaxis;GO:1904266 regulation of Schwann cell chemotaxis;GO:1990751 Schwann cell chemotaxis		RAS pathway related proteins	Cell Junctions(Enhanced)Nucleus(Supported)Cytokinetic bridge;Cytosol;Nuclear membrane;Nucleoli(Approved)		(M120)PID ARF6 DOWNSTREAM PATHWAY; (M273)PID EPHA2 FWD PATHWAY; (M257)PID EPHRINB REV PATHWAY	(M5923)HALLMARK PI3K AKT MTOR SIGNALING; (M5947)HALLMARK IL2 STAT5 SIGNALING; (M5893)HALLMARK MITOTIC SPINDLE	1.0	1.0	0.0	1.0	0.0	0.0	1.0	0.0	0.0	0.0	0.0	1.0	0.0	0.0	0.0	1.0	0.0	0.0	0.0	0.0
ENSG00000148671	10974	ensembl_gene_id	H. sapiens	10974	H. sapiens	ADIRF	adipogenesis regulatory factor	GO:0072719 cellular response to cisplatin;GO:0072718 response to cisplatin;GO:0045600 positive regulation of fat cell differentiation			Nucleoplasm(Supported)Cytosol(Approved)				0.0	0.0	0.0	0.0	0.0	0.0	0.0	0.0	0.0	0.0	0.0	0.0	0.0	0.0	0.0	0.0	0.0	0.0	0.0	0.0
ENSG00000165475	51084	ensembl_gene_id	H. sapiens	51084	H. sapiens	CRYL1	crystallin lambda 1	GO:0019640 glucuronate catabolic process to xylulose 5-phosphate;GO:0006064 glucuronate catabolic process;GO:1901159 xylulose 5-phosphate biosynthetic process		Enzymes/ENZYME proteins/Oxidoreductases	Golgi apparatus;Nucleoli;Nucleus;Plasma membrane(Approved)				0.0	0.0	0.0	0.0	0.0	0.0	0.0	0.0	0.0	0.0	0.0	0.0	0.0	0.0	0.0	0.0	0.0	0.0	0.0	0.0
ENSG00000197467	1305	ensembl_gene_id	H. sapiens	1305	H. sapiens	COL13A1	collagen type XIII alpha 1 chain	GO:0001958 endochondral ossification;GO:0060350 endochondral bone morphogenesis;GO:0036075 replacement ossification					(M3005)NABA COLLAGENS; (M198)PID SYNDECAN 1 PATHWAY; (M160)PID AVB3 INTEGRIN PATHWAY		0.0	1.0	0.0	0.0	1.0	0.0	0.0	1.0	0.0	0.0	0.0	0.0	1.0	0.0	0.0	0.0	0.0	0.0	0.0	0.0
ENSG00000175352	56675	ensembl_gene_id	H. sapiens	56675	H. sapiens	NRIP3	nuclear receptor interacting protein 3	GO:0006508 proteolysis;GO:0019538 protein metabolic process;GO:1901564 organonitrogen compound metabolic process			Cytosol(Approved)				0.0	0.0	0.0	0.0	0.0	0.0	0.0	0.0	0.0	0.0	0.0	0.0	0.0	0.0	0.0	0.0	0.0	0.0	0.0	0.0
ENSG00000147394	7739	ensembl_gene_id	H. sapiens	7739	H. sapiens	ZNF185	zinc finger protein 185 with LIM domain				Actin filaments;Cytosol;Focal adhesion sites;Plasma membrane(Supported)			(M5906)HALLMARK ESTROGEN RESPONSE EARLY	0.0	0.0	0.0	0.0	0.0	0.0	0.0	0.0	0.0	0.0	0.0	0.0	0.0	0.0	0.0	0.0	0.0	0.0	0.0	0.0
ENSG00000138162	10579	ensembl_gene_id	H. sapiens	10579	H. sapiens	TACC2	transforming acidic coiled-coil containing protein 2	GO:0021987 cerebral cortex development;GO:0021543 pallium development;GO:0007052 mitotic spindle organization			Cytosol;Nucleoplasm(Supported)Plasma membrane(Uncertain)				0.0	0.0	0.0	0.0	0.0	0.0	0.0	0.0	0.0	0.0	0.0	0.0	0.0	0.0	0.0	0.0	0.0	0.0	0.0	0.0
ENSG00000104177	50804	ensembl_gene_id	H. sapiens	50804	H. sapiens	MYEF2	myelin expression factor 2	GO:2000815 regulation of mRNA stability involved in response to oxidative stress;GO:0010610 regulation of mRNA stability involved in response to stress;GO:0043488 regulation of mRNA stability			Nucleoplasm(Supported)		(M15743)ST GA12 PATHWAY; (M12012)ST P38 MAPK PATHWAY; (M3721)ST JNK MAPK PATHWAY		0.0	0.0	0.0	0.0	0.0	0.0	0.0	0.0	0.0	0.0	0.0	0.0	0.0	0.0	0.0	0.0	0.0	1.0	0.0	0.0
ENSG00000144730	54756	ensembl_gene_id	H. sapiens	54756	H. sapiens	IL17RD	interleukin 17 receptor D	GO:0019221 cytokine-mediated signaling pathway;GO:0000165 MAPK cascade;GO:0023014 signal transduction by protein phosphorylation			Golgi apparatus;Nucleoplasm(Supported)		(M276)PID FGF PATHWAY		0.0	0.0	0.0	0.0	0.0	0.0	0.0	0.0	0.0	0.0	0.0	0.0	0.0	0.0	0.0	0.0	0.0	0.0	0.0	0.0
ENSG00000197461	5154	ensembl_gene_id	H. sapiens	5154	H. sapiens	PDGFA	platelet derived growth factor subunit A	GO:0035793 positive regulation of metanephric mesenchymal cell migration by platelet-derived growth factor receptor-beta signaling pathway;GO:1900238 regulation of metanephric mesenchymal cell migration by platelet-derived growth factor receptor-beta signaling pathway;GO:2000591 positive regulation of metanephric mesenchymal cell migration		RAS pathway related proteins	Microtubule organizing center;Vesicles(Approved)		(M144)PID CERAMIDE PATHWAY; (M5883)NABA SECRETED FACTORS; (M5885)NABA MATRISOME ASSOCIATED	(M5944)HALLMARK ANGIOGENESIS; (M5939)HALLMARK P53 PATHWAY	1.0	1.0	1.0	1.0	0.0	1.0	1.0	1.0	0.0	1.0	0.0	1.0	0.0	1.0	1.0	0.0	1.0	0.0	1.0	0.0
ENSG00000075426	2355	ensembl_gene_id	H. sapiens	2355	H. sapiens	FOSL2	FOS like 2, AP-1 transcription factor subunit	GO:0003334 keratinocyte development;GO:0048146 positive regulation of fibroblast proliferation;GO:0030216 keratinocyte differentiation		Transcription factors/Basic domains	Nucleus(Enhanced)		(M65)PID FRA PATHWAY; (M236)PID DELTA NP63 PATHWAY; (M167)PID AP1 PATHWAY	(M5891)HALLMARK HYPOXIA; (M5890)HALLMARK TNFA SIGNALING VIA NFKB	0.0	0.0	0.0	0.0	0.0	0.0	0.0	0.0	0.0	0.0	0.0	0.0	0.0	0.0	0.0	0.0	1.0	0.0	0.0	0.0
ENSG00000136859	23452	ensembl_gene_id	H. sapiens	23452	H. sapiens	ANGPTL2	angiopoietin like 2	GO:0007275 multicellular organism development;GO:0048856 anatomical structure development;GO:0032502 developmental process			Golgi apparatus(Approved)		(M16801)SIG REGULATION OF THE ACTIN CYTOSKELETON BY RHO GTPASES; (M5193)SIG CHEMOTAXIS; (M3270)ST INTEGRIN SIGNALING PATHWAY		0.0	0.0	0.0	0.0	0.0	0.0	0.0	0.0	0.0	0.0	0.0	0.0	0.0	0.0	1.0	0.0	0.0	0.0	0.0	0.0
ENSG00000137094	25822	ensembl_gene_id	H. sapiens	25822	H. sapiens	DNAJB5	DnaJ heat shock protein family (Hsp40) member B5	GO:0051085 chaperone cofactor-dependent protein refolding;GO:0051084 'de novo' posttranslational protein folding;GO:0006458 'de novo' protein folding			Cytosol;Nucleus(Approved)				0.0	0.0	0.0	0.0	0.0	0.0	0.0	0.0	0.0	0.0	0.0	0.0	0.0	0.0	0.0	0.0	0.0	0.0	0.0	0.0
ENSG00000062282	84649	ensembl_gene_id	H. sapiens	84649	H. sapiens	DGAT2	diacylglycerol O-acyltransferase 2	GO:0010867 positive regulation of triglyceride biosynthetic process;GO:0071400 cellular response to oleic acid;GO:0046322 negative regulation of fatty acid oxidation		Enzymes/ENZYME proteins/Transferases					0.0	0.0	0.0	0.0	0.0	0.0	0.0	0.0	0.0	0.0	0.0	0.0	0.0	0.0	0.0	0.0	0.0	0.0	1.0	0.0
ENSG00000232434	389813	ensembl_gene_id	H. sapiens	389813	H. sapiens	AJM1	apical junction component 1 homolog	GO:0045216 cell-cell junction organization;GO:0034330 cell junction organization;GO:0016043 cellular component organization			Cytosol;Focal adhesion sites(Approved)				0.0	0.0	0.0	0.0	0.0	0.0	0.0	0.0	0.0	0.0	0.0	0.0	0.0	0.0	0.0	0.0	0.0	0.0	0.0	0.0
ENSG00000156103	4325	ensembl_gene_id	H. sapiens	4325	H. sapiens	MMP16	matrix metallopeptidase 16	GO:0001958 endochondral ossification;GO:0097094 craniofacial suture morphogenesis;GO:0048701 embryonic cranial skeleton morphogenesis		Enzymes/Peptidases/Metallopeptidases	Cytosol;Vesicles(Approved)	Marimastat (Zinc ion binding);Batimastat (Zinc ion binding)	(M3468)NABA ECM REGULATORS; (M5885)NABA MATRISOME ASSOCIATED; (M5889)NABA MATRISOME	(M5942)HALLMARK UV RESPONSE DN	0.0	0.0	0.0	0.0	1.0	0.0	0.0	1.0	0.0	0.0	0.0	0.0	1.0	0.0	1.0	0.0	0.0	0.0	0.0	0.0
ENSG00000116151	79906	ensembl_gene_id	H. sapiens	79906	H. sapiens	MORN1	MORN repeat containing 1				Mitochondria;Nucleus(Approved)				0.0	0.0	0.0	0.0	0.0	0.0	0.0	0.0	0.0	0.0	0.0	0.0	0.0	0.0	0.0	0.0	0.0	0.0	0.0	0.0
ENSG00000171444	4163	ensembl_gene_id	H. sapiens	4163	H. sapiens	MCC	MCC regulator of WNT signaling pathway	GO:0010633 negative regulation of epithelial cell migration;GO:0090090 negative regulation of canonical Wnt signaling pathway;GO:0030178 negative regulation of Wnt signaling pathway			Nucleoplasm(Supported)				0.0	0.0	0.0	0.0	0.0	1.0	0.0	0.0	0.0	0.0	1.0	0.0	0.0	0.0	0.0	0.0	0.0	0.0	0.0	0.0
ENSG00000111266	80824	ensembl_gene_id	H. sapiens	80824	H. sapiens	DUSP16	dual specificity phosphatase 16	GO:0045209 MAPK phosphatase export from nucleus, leptomycin B sensitive;GO:0045208 MAPK phosphatase export from nucleus;GO:0045204 MAPK export from nucleus		Enzymes/ENZYME proteins/Hydrolases	Nucleoplasm(Supported)		(M76)PID P38 ALPHA BETA PATHWAY		0.0	0.0	0.0	1.0	0.0	0.0	0.0	0.0	0.0	0.0	0.0	0.0	0.0	1.0	0.0	0.0	0.0	0.0	0.0	0.0
ENSG00000116128	607	ensembl_gene_id	H. sapiens	607	H. sapiens	BCL9	BCL9 transcription coactivator	GO:0014908 myotube differentiation involved in skeletal muscle regeneration;GO:1904837 beta-catenin-TCF complex assembly;GO:0043403 skeletal muscle tissue regeneration			Nuclear bodies;Nucleoplasm(Approved)		(M223)PID BETA CATENIN NUC PATHWAY; (M5493)WNT SIGNALING		0.0	0.0	0.0	0.0	0.0	0.0	1.0	0.0	1.0	1.0	0.0	0.0	0.0	0.0	0.0	0.0	0.0	1.0	0.0	0.0
ENSG00000128849	84952	ensembl_gene_id	H. sapiens	84952	H. sapiens	CGNL1	cingulin like 1	GO:0051497 negative regulation of stress fiber assembly;GO:0032232 negative regulation of actin filament bundle assembly;GO:0051492 regulation of stress fiber assembly			Cell Junctions(Approved)				0.0	0.0	0.0	0.0	0.0	0.0	0.0	0.0	0.0	0.0	0.0	0.0	0.0	1.0	0.0	0.0	0.0	0.0	0.0	0.0
ENSG00000169570	285605	ensembl_gene_id	H. sapiens	285605	H. sapiens	DTWD2	DTW domain containing 2				Nuclear bodies(Supported)				0.0	0.0	0.0	0.0	0.0	0.0	0.0	0.0	0.0	0.0	0.0	0.0	0.0	0.0	0.0	0.0	0.0	0.0	0.0	0.0
ENSG00000108852	4355	ensembl_gene_id	H. sapiens	4355	H. sapiens	MPP2	membrane palmitoylated protein 2	GO:0060079 excitatory postsynaptic potential;GO:0060291 long-term synaptic potentiation;GO:0099565 chemical synaptic transmission, postsynaptic			Cytosol;Mitochondria(Approved)			(M5934)HALLMARK XENOBIOTIC METABOLISM	0.0	0.0	0.0	0.0	0.0	0.0	0.0	0.0	0.0	0.0	0.0	0.0	0.0	0.0	0.0	0.0	0.0	0.0	0.0	0.0
ENSG00000205476	317762	ensembl_gene_id	H. sapiens	317762	H. sapiens	CCDC85C	coiled-coil domain containing 85C	GO:0021987 cerebral cortex development;GO:0021543 pallium development;GO:0021537 telencephalon development			Cell Junctions;Nuclear speckles(Approved)				0.0	0.0	0.0	0.0	0.0	0.0	0.0	0.0	0.0	0.0	0.0	0.0	0.0	0.0	0.0	0.0	0.0	0.0	0.0	0.0
ENSG00000162643	126820	ensembl_gene_id	H. sapiens	126820	H. sapiens	WDR63	WD repeat domain 63	GO:0036159 inner dynein arm assembly;GO:0060294 cilium movement involved in cell motility;GO:0070286 axonemal dynein complex assembly							0.0	0.0	0.0	0.0	0.0	0.0	0.0	0.0	0.0	0.0	0.0	0.0	0.0	0.0	0.0	0.0	0.0	0.0	0.0	0.0
ENSG00000183876	340075	ensembl_gene_id	H. sapiens	340075	H. sapiens	ARSI	arylsulfatase family member I				Golgi apparatus(Approved)				0.0	0.0	0.0	0.0	0.0	0.0	0.0	0.0	0.0	0.0	0.0	0.0	0.0	0.0	0.0	0.0	0.0	0.0	0.0	0.0
ENSG00000116701	4688	ensembl_gene_id	H. sapiens	4688	H. sapiens	NCF2	neutrophil cytosolic factor 2	GO:0002479 antigen processing and presentation of exogenous peptide antigen via MHC class I, TAP-dependent;GO:0042590 antigen processing and presentation of exogenous peptide antigen via MHC class I;GO:0042554 superoxide anion generation			Cytosol(Enhanced)Nucleoli(Supported)		(M278)PID RAC1 PATHWAY		0.0	0.0	0.0	0.0	0.0	0.0	0.0	0.0	0.0	0.0	0.0	1.0	0.0	0.0	0.0	0.0	0.0	0.0	0.0	0.0
ENSG00000164619	168667	ensembl_gene_id	H. sapiens	168667	H. sapiens	BMPER	BMP binding endothelial regulator	GO:1903672 positive regulation of sprouting angiogenesis;GO:0002043 blood vessel endothelial cell proliferation involved in sprouting angiogenesis;GO:0001657 ureteric bud development					(M3008)NABA ECM GLYCOPROTEINS; (M5884)NABA CORE MATRISOME; (M5889)NABA MATRISOME		0.0	1.0	0.0	1.0	0.0	1.0	0.0	1.0	1.0	0.0	0.0	0.0	0.0	0.0	0.0	0.0	0.0	0.0	0.0	0.0
ENSG00000102796	79758	ensembl_gene_id	H. sapiens	79758	H. sapiens	DHRS12	dehydrogenase/reductase 12	GO:0055114 oxidation-reduction process;GO:0008152 metabolic process;GO:0008150 biological_process			Nucleoplasm(Supported)Golgi apparatus;Vesicles(Approved)				0.0	0.0	0.0	0.0	0.0	0.0	0.0	0.0	0.0	0.0	0.0	0.0	0.0	0.0	0.0	0.0	0.0	0.0	0.0	0.0
ENSG00000176845	284207	ensembl_gene_id	H. sapiens	284207	H. sapiens	METRNL	meteorin like, glial cell differentiation regulator	GO:0090336 positive regulation of brown fat cell differentiation;GO:0090335 regulation of brown fat cell differentiation;GO:0014850 response to muscle activity							0.0	0.0	0.0	0.0	0.0	0.0	0.0	0.0	0.0	1.0	0.0	0.0	0.0	0.0	0.0	0.0	0.0	0.0	0.0	0.0
ENSG00000156711	5603	ensembl_gene_id	H. sapiens	5603	H. sapiens	MAPK13	mitogen-activated protein kinase 13	GO:0072740 cellular response to anisomycin;GO:1903936 cellular response to sodium arsenite;GO:0072709 cellular response to sorbitol	CMGC Ser/Thr protein kinase family	Enzymes/{ENZYME proteins/Transferases,Kinases/CMGC Ser/Thr protein kinases}	Cytosol;Nucleoli;Nucleus(Approved)	KC706 (Protein serine/threonine kinase activity)	(M209)PID P38 GAMMA DELTA PATHWAY; (M12705)SIG CD40PATHWAYMAP; (M12012)ST P38 MAPK PATHWAY	(M5915)HALLMARK APICAL JUNCTION; (M5907)HALLMARK ESTROGEN RESPONSE LATE	0.0	0.0	0.0	0.0	0.0	0.0	0.0	0.0	0.0	0.0	0.0	1.0	0.0	0.0	0.0	0.0	0.0	0.0	0.0	0.0
ENSG00000187583	84069	ensembl_gene_id	H. sapiens	84069	H. sapiens	PLEKHN1	pleckstrin homology domain containing N1	GO:0061158 3'-UTR-mediated mRNA destabilization;GO:0061157 mRNA destabilization;GO:0061014 positive regulation of mRNA catabolic process			Nuclear speckles(Approved)				0.0	0.0	0.0	0.0	0.0	0.0	0.0	0.0	0.0	0.0	0.0	0.0	0.0	0.0	0.0	1.0	0.0	0.0	0.0	0.0
ENSG00000253305	56100	ensembl_gene_id	H. sapiens	56100	H. sapiens	PCDHGB6	protocadherin gamma subfamily B, 6	GO:0007156 homophilic cell adhesion via plasma membrane adhesion molecules;GO:0098742 cell-cell adhesion via plasma-membrane adhesion molecules;GO:0098609 cell-cell adhesion			Cytosol;Nucleus;Plasma membrane;Vesicles(Approved)				0.0	0.0	0.0	0.0	0.0	0.0	0.0	0.0	0.0	0.0	0.0	0.0	0.0	0.0	0.0	0.0	0.0	0.0	0.0	0.0
ENSG00000127220	79575	ensembl_gene_id	H. sapiens	79575	H. sapiens	ABHD8	abhydrolase domain containing 8				Nuclear bodies;Nucleoplasm(Approved)				0.0	0.0	0.0	0.0	0.0	0.0	0.0	0.0	0.0	0.0	0.0	0.0	0.0	0.0	0.0	0.0	0.0	0.0	0.0	0.0
ENSG00000102802	84935	ensembl_gene_id	H. sapiens	84935	H. sapiens	MEDAG	mesenteric estrogen dependent adipogenesis	GO:0045600 positive regulation of fat cell differentiation;GO:0045598 regulation of fat cell differentiation;GO:0045444 fat cell differentiation							0.0	0.0	0.0	0.0	0.0	0.0	0.0	0.0	0.0	0.0	0.0	0.0	0.0	0.0	0.0	0.0	0.0	0.0	0.0	0.0
ENSG00000152256	5163	ensembl_gene_id	H. sapiens	5163	H. sapiens	PDK1	pyruvate dehydrogenase kinase 1	GO:0010510 regulation of acetyl-CoA biosynthetic process from pyruvate;GO:0050812 regulation of acyl-CoA biosynthetic process;GO:0006086 acetyl-CoA biosynthetic process from pyruvate	Atypical: PDK/BCKDK protein kinase family	Enzymes/{ENZYME proteins/Transferases,Kinases/Atypical kinases}	Mitochondria(Supported)Nucleoli(Uncertain)	4-[(3-CHLORO-4-{[(2R)-3,3,3-TRIFLUORO-2-HYDROXY-2-METHYLPROPANOYL]AMINO}PHENYL)SULFONYL]-N,N-DIMETHYLBENZAMIDE (Pyruvate dehydrogenase (acetyl-transferring) kinase activity);Dichloroacetic Acid (Pyruvate dehydrogenase (acetyl-transferring) kinase activity)		(M5923)HALLMARK PI3K AKT MTOR SIGNALING; (M5891)HALLMARK HYPOXIA; (M5924)HALLMARK MTORC1 SIGNALING	0.0	0.0	0.0	0.0	0.0	0.0	0.0	0.0	0.0	0.0	0.0	0.0	0.0	0.0	0.0	0.0	0.0	0.0	0.0	0.0
ENSG00000112294	7915	ensembl_gene_id	H. sapiens	7915	H. sapiens	ALDH5A1	aldehyde dehydrogenase 5 family member A1	GO:0006681 galactosylceramide metabolic process;GO:0009450 gamma-aminobutyric acid catabolic process;GO:0006083 acetate metabolic process		Enzymes/ENZYME proteins/Oxidoreductases	Mitochondria(Enhanced)	Succinic acid (Succinate-semialdehyde dehydrogenase [nad(p)+] activity);NADH (Succinate-semialdehyde dehydrogenase [nad(p)+] activity);Valproic Acid (Succinate-semialdehyde dehydrogenase [nad(p)+] activity);Chlormerodrin (Succinate-semialdehyde dehydrogenase [nad(p)+] activity)			0.0	0.0	0.0	0.0	0.0	0.0	0.0	0.0	0.0	0.0	0.0	0.0	0.0	0.0	0.0	0.0	0.0	0.0	0.0	0.0
ENSG00000145990	54438	ensembl_gene_id	H. sapiens	54438	H. sapiens	GFOD1	glucose-fructose oxidoreductase domain containing 1	GO:0055114 oxidation-reduction process;GO:0008152 metabolic process;GO:0008150 biological_process			Cytosol;Nucleoplasm;Plasma membrane(Approved)				0.0	0.0	0.0	0.0	0.0	0.0	0.0	0.0	0.0	0.0	0.0	0.0	0.0	0.0	0.0	0.0	0.0	0.0	0.0	0.0
ENSG00000130522	3727	ensembl_gene_id	H. sapiens	3727	H. sapiens	JUND	JunD proto-oncogene, AP-1 transcription factor subunit	GO:0002076 osteoblast development;GO:0045669 positive regulation of osteoblast differentiation;GO:0071277 cellular response to calcium ion		Transcription factors/Basic domains	Nucleus(Supported)		(M65)PID FRA PATHWAY; (M166)PID ATF2 PATHWAY; (M167)PID AP1 PATHWAY		0.0	0.0	0.0	0.0	1.0	0.0	0.0	0.0	0.0	0.0	0.0	1.0	0.0	0.0	0.0	0.0	0.0	0.0	0.0	0.0
ENSG00000114861	27086	ensembl_gene_id	H. sapiens	27086	H. sapiens	FOXP1	forkhead box P1	GO:0061470 T follicular helper cell differentiation;GO:0050861 positive regulation of B cell receptor signaling pathway;GO:0060766 negative regulation of androgen receptor signaling pathway		Transcription factors/Helix-turn-helix domains	Nucleoplasm(Enhanced)				1.0	1.0	1.0	0.0	0.0	1.0	0.0	0.0	0.0	0.0	0.0	0.0	1.0	0.0	0.0	0.0	0.0	0.0	0.0	0.0
ENSG00000128340	5880	ensembl_gene_id	H. sapiens	5880	H. sapiens	RAC2	Rac family small GTPase 2	GO:0090023 positive regulation of neutrophil chemotaxis;GO:0060753 regulation of mast cell chemotaxis;GO:1903955 positive regulation of protein targeting to mitochondrion		RAS pathway related proteins			(M210)PID IL8 CXCR2 PATHWAY	(M5915)HALLMARK APICAL JUNCTION	1.0	0.0	1.0	0.0	0.0	0.0	1.0	0.0	0.0	0.0	0.0	0.0	0.0	0.0	0.0	0.0	0.0	0.0	0.0	0.0
ENSG00000173641	27129	ensembl_gene_id	H. sapiens	27129	H. sapiens	HSPB7	heat shock protein family B (small) member 7	GO:0008016 regulation of heart contraction;GO:0060047 heart contraction;GO:1903522 regulation of blood circulation			Nucleoplasm(Approved)				0.0	0.0	0.0	0.0	0.0	0.0	0.0	0.0	0.0	0.0	0.0	0.0	0.0	0.0	0.0	0.0	0.0	0.0	0.0	0.0
ENSG00000108379	7473	ensembl_gene_id	H. sapiens	7473	H. sapiens	WNT3	Wnt family member 3	GO:0048697 positive regulation of collateral sprouting in absence of injury;GO:0048696 regulation of collateral sprouting in absence of injury;GO:1904954 canonical Wnt signaling pathway involved in midbrain dopaminergic neuron differentiation					(M77)PID WNT SIGNALING PATHWAY; (M5493)WNT SIGNALING; (M5883)NABA SECRETED FACTORS		0.0	1.0	0.0	0.0	1.0	0.0	1.0	0.0	0.0	1.0	0.0	0.0	0.0	0.0	1.0	0.0	0.0	0.0	0.0	0.0
ENSG00000106537	27075	ensembl_gene_id	H. sapiens	27075	H. sapiens	TSPAN13	tetraspanin 13	GO:1903169 regulation of calcium ion transmembrane transport;GO:0051924 regulation of calcium ion transport;GO:0070588 calcium ion transmembrane transport			Nucleus(Approved)			(M5953)HALLMARK KRAS SIGNALING UP; (M5907)HALLMARK ESTROGEN RESPONSE LATE	0.0	0.0	0.0	0.0	0.0	0.0	0.0	0.0	0.0	0.0	0.0	0.0	0.0	0.0	0.0	0.0	0.0	0.0	0.0	0.0
ENSG00000147852	7436	ensembl_gene_id	H. sapiens	7436	H. sapiens	VLDLR	very low density lipoprotein receptor	GO:0034436 glycoprotein transport;GO:0034447 very-low-density lipoprotein particle clearance;GO:0032802 low-density lipoprotein particle receptor catabolic process			Cytokinetic bridge;Microtubule organizing center;Vesicles(Approved)	Lauric Acid (Very-low-density lipoprotein particle receptor activity)	(M163)PID LIS1 PATHWAY; (M69)PID REELIN PATHWAY; (M174)PID UPA UPAR PATHWAY	(M5919)HALLMARK HEDGEHOG SIGNALING; (M5942)HALLMARK UV RESPONSE DN; (M5891)HALLMARK HYPOXIA	0.0	0.0	0.0	1.0	0.0	0.0	1.0	0.0	0.0	0.0	0.0	0.0	0.0	0.0	0.0	0.0	0.0	0.0	0.0	0.0
ENSG00000221963	80830	ensembl_gene_id	H. sapiens	80830	H. sapiens	APOL6	apolipoprotein L6	GO:0042157 lipoprotein metabolic process;GO:0006869 lipid transport;GO:0010876 lipid localization			Nuclear bodies;Nucleoplasm(Supported)Cytosol(Approved)			(M5913)HALLMARK INTERFERON GAMMA RESPONSE	0.0	0.0	0.0	0.0	0.0	0.0	0.0	0.0	0.0	0.0	0.0	0.0	0.0	0.0	0.0	0.0	0.0	0.0	0.0	0.0
ENSG00000188501	197021	ensembl_gene_id	H. sapiens	197021	H. sapiens	LCTL	lactase like	GO:0002089 lens morphogenesis in camera-type eye;GO:0002088 lens development in camera-type eye;GO:0048593 camera-type eye morphogenesis			Endoplasmic reticulum;Plasma membrane(Approved)	2,4-Dihydroxy-7-(Methyloxy)-2h-1,4-Benzoxazin-3(4h)-One (Hydrolase activity, hydrolyzing o-glycosyl compounds);Beta-D-Glucose (Hydrolase activity, hydrolyzing o-glycosyl compounds);Nojirimycine Tetrazole (Hydrolase activity, hydrolyzing o-glycosyl compounds);(2s)-Hydroxy(4-Hydroxyphenyl)Ethanenitrile (Hydrolase activity, hydrolyzing o-glycosyl compounds);PARA-NITROPHENYL 1-THIO-BETA-D-GLUCOPYRANO…			0.0	0.0	0.0	0.0	0.0	0.0	0.0	0.0	0.0	0.0	0.0	0.0	0.0	0.0	0.0	0.0	0.0	0.0	0.0	0.0
ENSG00000136541	57471	ensembl_gene_id	H. sapiens	57471	H. sapiens	ERMN	ermin	GO:0008360 regulation of cell shape;GO:0001763 morphogenesis of a branching structure;GO:0007015 actin filament organization							0.0	1.0	0.0	0.0	0.0	0.0	1.0	0.0	0.0	0.0	0.0	0.0	0.0	0.0	0.0	0.0	0.0	0.0	0.0	0.0
ENSG00000276600	338382	ensembl_gene_id	H. sapiens	338382	H. sapiens	RAB7B	RAB7B, member RAS oncogene family	GO:0034164 negative regulation of toll-like receptor 9 signaling pathway;GO:0034144 negative regulation of toll-like receptor 4 signaling pathway;GO:0034163 regulation of toll-like receptor 9 signaling pathway							0.0	0.0	1.0	0.0	0.0	0.0	0.0	0.0	0.0	0.0	0.0	0.0	0.0	0.0	0.0	0.0	0.0	0.0	0.0	0.0
ENSG00000088899	9762	ensembl_gene_id	H. sapiens	9762	H. sapiens	LZTS3	leucine zipper tumor suppressor family member 3	GO:0061001 regulation of dendritic spine morphogenesis;GO:0060997 dendritic spine morphogenesis;GO:0060998 regulation of dendritic spine development			Vesicles(Approved)				0.0	0.0	0.0	0.0	0.0	0.0	1.0	0.0	0.0	0.0	0.0	0.0	0.0	0.0	0.0	0.0	0.0	0.0	0.0	0.0
ENSG00000101311	55612	ensembl_gene_id	H. sapiens	55612	H. sapiens	FERMT1	fermitin family member 1	GO:0051886 negative regulation of timing of anagen;GO:2001203 positive regulation of transforming growth factor-beta secretion;GO:0048817 negative regulation of hair follicle maturation							0.0	0.0	1.0	0.0	0.0	1.0	0.0	1.0	1.0	0.0	1.0	0.0	0.0	0.0	0.0	0.0	1.0	0.0	0.0	0.0
ENSG00000110987	605	ensembl_gene_id	H. sapiens	605	H. sapiens	BCL7A	BAF chromatin remodeling complex subunit BCL7A	GO:0045892 negative regulation of transcription, DNA-templated;GO:1903507 negative regulation of nucleic acid-templated transcription;GO:1902679 negative regulation of RNA biosynthetic process			Nucleoplasm;Vesicles(Approved)				0.0	0.0	0.0	0.0	0.0	0.0	0.0	0.0	0.0	0.0	0.0	0.0	0.0	0.0	0.0	0.0	0.0	0.0	0.0	0.0
ENSG00000100234	7078	ensembl_gene_id	H. sapiens	7078	H. sapiens	TIMP3	TIMP metallopeptidase inhibitor 3	GO:1903984 positive regulation of TRAIL-activated apoptotic signaling pathway;GO:1903121 regulation of TRAIL-activated apoptotic signaling pathway;GO:1904684 negative regulation of metalloendopeptidase activity				pimagedine HCl (Protease binding)	(M3468)NABA ECM REGULATORS; (M5885)NABA MATRISOME ASSOCIATED; (M5889)NABA MATRISOME	(M5946)HALLMARK COAGULATION; (M5902)HALLMARK APOPTOSIS; (M5930)HALLMARK EPITHELIAL MESENCHYMAL TRANSITION	0.0	0.0	0.0	1.0	0.0	0.0	0.0	0.0	0.0	0.0	0.0	0.0	0.0	1.0	1.0	1.0	0.0	0.0	0.0	0.0
ENSG00000169213	5865	ensembl_gene_id	H. sapiens	5865	H. sapiens	RAB3B	RAB3B, member RAS oncogene family	GO:0051586 positive regulation of dopamine uptake involved in synaptic transmission;GO:0051944 positive regulation of catecholamine uptake involved in synaptic transmission;GO:0051584 regulation of dopamine uptake involved in synaptic transmission			Cell Junctions(Approved)				0.0	0.0	0.0	0.0	0.0	0.0	1.0	0.0	0.0	0.0	0.0	0.0	0.0	0.0	0.0	0.0	0.0	0.0	0.0	0.0
ENSG00000135480	3855	ensembl_gene_id	H. sapiens	3855	H. sapiens	KRT7	keratin 7	GO:0070268 cornification;GO:0031424 keratinization;GO:0030216 keratinocyte differentiation				Primaquine (Structural molecule activity);HspE7 (Structural molecule activity)			0.0	0.0	0.0	0.0	0.0	0.0	0.0	0.0	0.0	0.0	0.0	0.0	0.0	0.0	0.0	0.0	1.0	0.0	0.0	0.0
ENSG00000198796	115701	ensembl_gene_id	H. sapiens	115701	H. sapiens	ALPK2	alpha kinase 2	GO:0003308 negative regulation of Wnt signaling pathway involved in heart development;GO:0003307 regulation of Wnt signaling pathway involved in heart development;GO:1905223 epicardium morphogenesis	Atypical: Alpha-type protein kinase family	Enzymes/Kinases/Atypical kinases	Cytosol(Approved)				0.0	0.0	0.0	0.0	0.0	0.0	0.0	0.0	0.0	0.0	0.0	0.0	0.0	0.0	0.0	0.0	0.0	1.0	0.0	0.0
ENSG00000219438	25817	ensembl_gene_id	H. sapiens	25817	H. sapiens	TAFA5	TAFA chemokine like family member 5	GO:0007165 signal transduction;GO:0023052 signaling;GO:0007154 cell communication							0.0	0.0	0.0	0.0	0.0	0.0	0.0	0.0	0.0	0.0	0.0	0.0	0.0	0.0	0.0	0.0	0.0	0.0	0.0	0.0
ENSG00000130988	9104	ensembl_gene_id	H. sapiens	9104	H. sapiens	RGN	regucalcin	GO:1901671 positive regulation of superoxide dismutase activity;GO:1904833 positive regulation of removal of superoxide radicals;GO:1901896 positive regulation of calcium-transporting ATPase activity		Enzymes/ENZYME proteins/Hydrolases	Nucleus(Approved)			(M5946)HALLMARK COAGULATION	0.0	1.0	0.0	0.0	0.0	0.0	0.0	0.0	0.0	0.0	1.0	0.0	1.0	1.0	0.0	0.0	0.0	0.0	0.0	0.0
ENSG00000214575	64506	ensembl_gene_id	H. sapiens	64506	H. sapiens	CPEB1	cytoplasmic polyadenylation element binding protein 1	GO:1900365 positive regulation of mRNA polyadenylation;GO:0031442 positive regulation of mRNA 3'-end processing;GO:2000766 negative regulation of cytoplasmic translation			Cytosol;Nucleoplasm(Supported)		(M242)PID AURORA A PATHWAY		0.0	0.0	0.0	0.0	0.0	0.0	0.0	0.0	0.0	0.0	0.0	0.0	0.0	0.0	0.0	0.0	0.0	0.0	0.0	0.0
ENSG00000142197	9980	ensembl_gene_id	H. sapiens	9980	H. sapiens	DOP1B	DOP1 leucine zipper like protein B	GO:0006895 Golgi to endosome transport;GO:0007029 endoplasmic reticulum organization;GO:0006892 post-Golgi vesicle-mediated transport			Mitochondria;Nucleoplasm(Approved)				0.0	0.0	0.0	0.0	0.0	0.0	0.0	0.0	0.0	0.0	0.0	0.0	0.0	0.0	0.0	0.0	0.0	0.0	0.0	0.0
ENSG00000166922	6447	ensembl_gene_id	H. sapiens	6447	H. sapiens	SCG5	secretogranin V	GO:0016486 peptide hormone processing;GO:0046883 regulation of hormone secretion;GO:0046879 hormone secretion						(M5951)HALLMARK SPERMATOGENESIS; (M5953)HALLMARK KRAS SIGNALING UP	0.0	0.0	0.0	0.0	0.0	0.0	0.0	0.0	0.0	0.0	0.0	0.0	0.0	0.0	0.0	0.0	0.0	0.0	0.0	0.0
ENSG00000138835	5998	ensembl_gene_id	H. sapiens	5998	H. sapiens	RGS3	regulator of G protein signaling 3	GO:0000188 inactivation of MAPK activity;GO:0043407 negative regulation of MAP kinase activity;GO:0071901 negative regulation of protein serine/threonine kinase activity			Cytosol;Nucleoplasm(Enhanced)Mitochondria(Approved)		(M257)PID EPHRINB REV PATHWAY		0.0	0.0	0.0	1.0	0.0	0.0	0.0	0.0	0.0	0.0	0.0	0.0	0.0	1.0	0.0	0.0	0.0	0.0	0.0	0.0
ENSG00000198729	81706	ensembl_gene_id	H. sapiens	81706	H. sapiens	PPP1R14C	protein phosphatase 1 regulatory inhibitor subunit 14C	GO:0032515 negative regulation of phosphoprotein phosphatase activity;GO:0035308 negative regulation of protein dephosphorylation;GO:0010923 negative regulation of phosphatase activity					(M71)PID ILK PATHWAY		0.0	0.0	0.0	0.0	0.0	0.0	0.0	0.0	0.0	0.0	0.0	0.0	0.0	1.0	0.0	0.0	0.0	0.0	0.0	0.0
ENSG00000204103	9935	ensembl_gene_id	H. sapiens	9935	H. sapiens	MAFB	MAF bZIP transcription factor B	GO:0021599 abducens nerve formation;GO:0021598 abducens nerve morphogenesis;GO:0021572 rhombomere 6 development		Transcription factors/Basic domains	Cytosol;Golgi apparatus;Nucleoli;Nucleus(Approved)			(M5957)HALLMARK PANCREAS BETA CELLS; (M5953)HALLMARK KRAS SIGNALING UP	0.0	0.0	1.0	0.0	0.0	0.0	0.0	0.0	0.0	0.0	0.0	0.0	0.0	0.0	0.0	0.0	0.0	0.0	0.0	0.0
ENSG00000265190	653145	ensembl_gene_id	H. sapiens	653145	H. sapiens	ANXA8	annexin A8	GO:1900138 negative regulation of phospholipase A2 activity;GO:1900004 negative regulation of serine-type endopeptidase activity;GO:1902572 negative regulation of serine-type peptidase activity			Nucleoplasm(Approved)		(M5880)NABA ECM AFFILIATED; (M5885)NABA MATRISOME ASSOCIATED; (M5889)NABA MATRISOME		0.0	0.0	0.0	0.0	0.0	0.0	0.0	0.0	0.0	1.0	0.0	0.0	0.0	0.0	1.0	0.0	0.0	0.0	0.0	0.0
ENSG00000182667	50863	ensembl_gene_id	H. sapiens	50863	H. sapiens	NTM	neurotrimin	GO:0008038 neuron recognition;GO:0008037 cell recognition;GO:0048666 neuron development						(M5930)HALLMARK EPITHELIAL MESENCHYMAL TRANSITION	0.0	0.0	0.0	0.0	0.0	0.0	0.0	0.0	0.0	0.0	0.0	0.0	0.0	0.0	0.0	0.0	0.0	0.0	0.0	0.0
ENSG00000145715	5921	ensembl_gene_id	H. sapiens	5921	H. sapiens	RASA1	RAS p21 protein activator 1	GO:0001953 negative regulation of cell-matrix adhesion;GO:0001570 vasculogenesis;GO:0046580 negative regulation of Ras protein signal transduction		RAS pathway related proteins			(M226)PID VEGFR1 PATHWAY; (M269)PID RAS PATHWAY; (M242)PID AURORA A PATHWAY	(M5919)HALLMARK HEDGEHOG SIGNALING; (M5893)HALLMARK MITOTIC SPINDLE; (M5915)HALLMARK APICAL JUNCTION	0.0	0.0	1.0	0.0	0.0	1.0	1.0	0.0	0.0	0.0	0.0	1.0	0.0	1.0	0.0	0.0	0.0	0.0	0.0	0.0
ENSG00000143631	2312	ensembl_gene_id	H. sapiens	2312	H. sapiens	FLG	filaggrin	GO:0061436 establishment of skin barrier;GO:0070268 cornification;GO:0033561 regulation of water loss via skin			Vesicles(Supported)		(M5883)NABA SECRETED FACTORS; (M5885)NABA MATRISOME ASSOCIATED; (M5889)NABA MATRISOME		0.0	0.0	0.0	0.0	0.0	0.0	0.0	0.0	0.0	1.0	0.0	0.0	0.0	0.0	1.0	0.0	1.0	0.0	0.0	0.0
ENSG00000159208	148523	ensembl_gene_id	H. sapiens	148523	H. sapiens	CIART	circadian associated repressor of transcription	GO:0045475 locomotor rhythm;GO:0032922 circadian regulation of gene expression;GO:0048512 circadian behavior			Nucleoplasm(Supported)				0.0	0.0	0.0	0.0	0.0	0.0	0.0	0.0	0.0	0.0	0.0	0.0	0.0	0.0	0.0	0.0	0.0	0.0	0.0	0.0
ENSG00000173848	10276	ensembl_gene_id	H. sapiens	10276	H. sapiens	NET1	neuroepithelial cell transforming 1	GO:0051451 myoblast migration;GO:0035025 positive regulation of Rho protein signal transduction;GO:0046579 positive regulation of Ras protein signal transduction			Nucleus;Vesicles(Approved)		(M68)PID RHOA REG PATHWAY	(M5893)HALLMARK MITOTIC SPINDLE	0.0	0.0	0.0	0.0	0.0	0.0	0.0	0.0	0.0	0.0	0.0	0.0	0.0	0.0	0.0	1.0	0.0	0.0	0.0	0.0
ENSG00000145362	287	ensembl_gene_id	H. sapiens	287	H. sapiens	ANK2	ankyrin 2	GO:0010881 regulation of cardiac muscle contraction by regulation of the release of sequestered calcium ion;GO:0098907 regulation of SA node cell action potential;GO:0010880 regulation of release of sequestered calcium ion into cytosol by sarcoplasmic reticulum		Transporters/Accessory Factors Involved in Transport	Plasma membrane(Supported)				0.0	0.0	0.0	0.0	0.0	0.0	0.0	0.0	0.0	0.0	0.0	0.0	0.0	0.0	0.0	0.0	0.0	1.0	0.0	0.0
ENSG00000165617	51339	ensembl_gene_id	H. sapiens	51339	H. sapiens	DACT1	dishevelled binding antagonist of beta catenin 1	GO:1904864 negative regulation of beta-catenin-TCF complex assembly;GO:1904863 regulation of beta-catenin-TCF complex assembly;GO:2000095 regulation of Wnt signaling pathway, planar cell polarity pathway			Nucleoplasm(Supported)		(M17761)ST WNT BETA CATENIN PATHWAY		0.0	1.0	0.0	1.0	0.0	0.0	0.0	0.0	1.0	0.0	0.0	0.0	0.0	1.0	0.0	0.0	0.0	0.0	0.0	0.0
ENSG00000182578	1436	ensembl_gene_id	H. sapiens	1436	H. sapiens	CSF1R	colony stimulating factor 1 receptor	GO:0090197 positive regulation of chemokine secretion;GO:0038145 macrophage colony-stimulating factor signaling pathway;GO:0044794 positive regulation by host of viral process	Tyr protein kinase family	CD markers;Enzymes/{ENZYME proteins/Transferases,Kinases/Tyr protein kinases};RAS pathway related proteins	Plasma membrane(Supported)Vesicles(Approved)	Imatinib (Protein homodimerization activity);Sunitinib (Protein homodimerization activity);ABT-869 (Protein homodimerization activity);5-CYANO-FURAN-2-CARBOXYLIC ACID [5-HYDROXYMETHYL-2-(4-METHYL-PIPERIDIN-1-YL)-PHENYL]-AMIDE (Protein homodimerization activity);6-CHLORO-3-(3-METHYLISOXAZOL-5-YL)-4-PHENYLQUINOLIN-2(1H)-ONE (Protein homodimerization activity)	(M91)PID TCPTP PATHWAY; (M50)PID PTP1B PATHWAY; (M160)PID AVB3 INTEGRIN PATHWAY		1.0	1.0	1.0	1.0	0.0	0.0	1.0	0.0	0.0	0.0	1.0	1.0	0.0	0.0	0.0	0.0	0.0	0.0	0.0	0.0
ENSG00000163820	79443	ensembl_gene_id	H. sapiens	79443	H. sapiens	FYCO1	FYVE and coiled-coil domain autophagy adaptor 1	GO:0072383 plus-end-directed vesicle transport along microtubule;GO:1901098 positive regulation of autophagosome maturation;GO:0072386 plus-end-directed organelle transport along microtubule			Vesicles(Enhanced)				0.0	0.0	0.0	0.0	0.0	0.0	0.0	0.0	0.0	0.0	0.0	0.0	0.0	0.0	0.0	0.0	0.0	0.0	0.0	0.0
ENSG00000137507	2615	ensembl_gene_id	H. sapiens	2615	H. sapiens	LRRC32	leucine rich repeat containing 32	GO:1901398 regulation of transforming growth factor beta3 activation;GO:0036366 transforming growth factor beta3 activation;GO:0046007 negative regulation of activated T cell proliferation			Nucleoplasm(Supported)				0.0	0.0	1.0	0.0	0.0	0.0	0.0	0.0	1.0	0.0	1.0	0.0	1.0	0.0	0.0	0.0	0.0	0.0	0.0	0.0
ENSG00000172935	116535	ensembl_gene_id	H. sapiens	116535	H. sapiens	MRGPRF	MAS related GPR family member F	GO:0007186 G protein-coupled receptor signaling pathway;GO:0007165 signal transduction;GO:0023052 signaling		G-protein coupled receptors/GPCRs excl olfactory receptors;Transporters	Plasma membrane(Supported)Nuclear membrane(Approved)				0.0	0.0	0.0	0.0	0.0	0.0	0.0	0.0	0.0	0.0	0.0	0.0	0.0	0.0	0.0	0.0	0.0	0.0	0.0	0.0
ENSG00000161243	126433	ensembl_gene_id	H. sapiens	126433	H. sapiens	FBXO27	F-box protein 27	GO:0031146 SCF-dependent proteasomal ubiquitin-dependent protein catabolic process;GO:0030433 ubiquitin-dependent ERAD pathway;GO:0006516 glycoprotein catabolic process			Nucleoplasm(Approved)				0.0	0.0	0.0	0.0	0.0	0.0	0.0	0.0	0.0	0.0	0.0	0.0	0.0	0.0	0.0	0.0	0.0	0.0	0.0	0.0
ENSG00000082126	58538	ensembl_gene_id	H. sapiens	58538	H. sapiens	MPP4	membrane palmitoylated protein 4	GO:0035418 protein localization to synapse;GO:0008104 protein localization;GO:0033036 macromolecule localization			Cytosol(Supported)Actin filaments(Approved)				0.0	0.0	0.0	0.0	0.0	0.0	0.0	0.0	0.0	0.0	0.0	0.0	0.0	0.0	0.0	0.0	0.0	0.0	0.0	0.0
ENSG00000185437	6450	ensembl_gene_id	H. sapiens	6450	H. sapiens	SH3BGR	SH3 domain binding glutamate rich protein	GO:0009967 positive regulation of signal transduction;GO:0023056 positive regulation of signaling;GO:0010647 positive regulation of cell communication			Cytosol;Plasma membrane(Approved)			(M5909)HALLMARK MYOGENESIS	0.0	0.0	0.0	0.0	0.0	0.0	0.0	0.0	0.0	0.0	0.0	0.0	0.0	0.0	0.0	0.0	0.0	0.0	0.0	0.0
ENSG00000214193	79729	ensembl_gene_id	H. sapiens	79729	H. sapiens	SH3D21	SH3 domain containing 21				Nucleus;Plasma membrane(Approved)				0.0	0.0	0.0	0.0	0.0	0.0	0.0	0.0	0.0	0.0	0.0	0.0	0.0	0.0	0.0	0.0	0.0	0.0	0.0	0.0
ENSG00000164093	5308	ensembl_gene_id	H. sapiens	5308	H. sapiens	PITX2	paired like homeodomain 2	GO:0060127 prolactin secreting cell differentiation;GO:0003253 cardiac neural crest cell migration involved in outflow tract morphogenesis;GO:0060126 somatotropin secreting cell differentiation		Transcription factors/Helix-turn-helix domains	Nucleus(Enhanced)		(M2701)ST MYOCYTE AD PATHWAY; (M7416)ST GAQ PATHWAY; (M18342)ST G ALPHA I PATHWAY	(M5923)HALLMARK PI3K AKT MTOR SIGNALING	0.0	0.0	0.0	0.0	0.0	1.0	0.0	0.0	0.0	0.0	0.0	0.0	1.0	0.0	0.0	0.0	1.0	1.0	0.0	0.0
ENSG00000012171	7869	ensembl_gene_id	H. sapiens	7869	H. sapiens	SEMA3B	semaphorin 3B	GO:0048843 negative regulation of axon extension involved in axon guidance;GO:0061643 chemorepulsion of axon;GO:0048841 regulation of axon extension involved in axon guidance					(M5880)NABA ECM AFFILIATED; (M5885)NABA MATRISOME ASSOCIATED; (M5889)NABA MATRISOME	(M5892)HALLMARK CHOLESTEROL HOMEOSTASIS; (M5906)HALLMARK ESTROGEN RESPONSE EARLY; (M5953)HALLMARK KRAS SIGNALING UP	1.0	0.0	0.0	0.0	0.0	1.0	1.0	0.0	0.0	1.0	0.0	0.0	0.0	0.0	1.0	0.0	0.0	0.0	0.0	0.0
ENSG00000132003	65249	ensembl_gene_id	H. sapiens	65249	H. sapiens	ZSWIM4	zinc finger SWIM-type containing 4	GO:1902667 regulation of axon guidance;GO:0050770 regulation of axonogenesis;GO:0007411 axon guidance							0.0	0.0	0.0	0.0	0.0	0.0	1.0	0.0	0.0	0.0	0.0	0.0	0.0	0.0	0.0	0.0	0.0	0.0	0.0	0.0
ENSG00000164300	256987	ensembl_gene_id	H. sapiens	256987	H. sapiens	SERINC5	serine incorporator 5	GO:0006564 L-serine biosynthetic process;GO:1904219 positive regulation of CDP-diacylglycerol-serine O-phosphatidyltransferase activity;GO:1904222 positive regulation of serine C-palmitoyltransferase activity			Golgi apparatus;Nucleus;Vesicles(Uncertain)				0.0	0.0	0.0	1.0	0.0	0.0	0.0	0.0	0.0	0.0	0.0	0.0	0.0	0.0	0.0	0.0	0.0	0.0	0.0	0.0
ENSG00000049192	11174	ensembl_gene_id	H. sapiens	11174	H. sapiens	ADAMTS6	ADAM metallopeptidase with thrombospondin type 1 motif 6	GO:0035904 aorta development;GO:0060976 coronary vasculature development;GO:0060840 artery development					(M3468)NABA ECM REGULATORS; (M5885)NABA MATRISOME ASSOCIATED; (M5889)NABA MATRISOME		0.0	0.0	0.0	0.0	0.0	1.0	0.0	0.0	0.0	0.0	0.0	0.0	0.0	0.0	1.0	0.0	0.0	0.0	0.0	0.0
ENSG00000188483	389792	ensembl_gene_id	H. sapiens	389792	H. sapiens	IER5L	immediate early response 5 like				Nucleus(Approved)				0.0	0.0	0.0	0.0	0.0	0.0	0.0	0.0	0.0	0.0	0.0	0.0	0.0	0.0	0.0	0.0	0.0	0.0	0.0	0.0
ENSG00000197822	100506658	ensembl_gene_id	H. sapiens	100506658	H. sapiens	OCLN	occludin	GO:0046326 positive regulation of glucose import;GO:1905605 positive regulation of maintenance of permeability of blood-brain barrier;GO:0010828 positive regulation of glucose transmembrane transport		Transporters	Cell Junctions;Plasma membrane(Supported)		(M286)PID TGFBR PATHWAY		0.0	0.0	0.0	0.0	0.0	0.0	1.0	0.0	0.0	1.0	0.0	0.0	0.0	1.0	0.0	0.0	0.0	0.0	0.0	0.0
ENSG00000160013	5739	ensembl_gene_id	H. sapiens	5739	H. sapiens	PTGIR	prostaglandin I2 receptor	GO:0010642 negative regulation of platelet-derived growth factor receptor signaling pathway;GO:0010640 regulation of platelet-derived growth factor receptor signaling pathway;GO:0048662 negative regulation of smooth muscle cell proliferation		G-protein coupled receptors/GPCRs excl olfactory receptors		Treprostinil (Guanyl-nucleotide exchange factor activity);Iloprost (Guanyl-nucleotide exchange factor activity);Dinoprost Tromethamine (Guanyl-nucleotide exchange factor activity);Epoprostenol (Guanyl-nucleotide exchange factor activity);Beraprost (Guanyl-nucleotide exchange factor activity);Selexipag (Guanyl-nucleotide exchange factor activity)	(M99)PID TXA2PATHWAY	(M5932)HALLMARK INFLAMMATORY RESPONSE	0.0	0.0	0.0	0.0	0.0	0.0	0.0	0.0	0.0	0.0	1.0	1.0	0.0	0.0	0.0	0.0	0.0	0.0	0.0	0.0
ENSG00000057019	131566	ensembl_gene_id	H. sapiens	131566	H. sapiens	DCBLD2	discoidin, CUB and LCCL domain containing 2	GO:0030308 negative regulation of cell growth;GO:0045926 negative regulation of growth;GO:0030522 intracellular receptor signaling pathway			Cytosol;Golgi apparatus;Plasma membrane(Approved)			(M5916)HALLMARK APICAL SURFACE; (M5932)HALLMARK INFLAMMATORY RESPONSE; (M5953)HALLMARK KRAS SIGNALING UP	0.0	0.0	0.0	0.0	0.0	0.0	0.0	0.0	0.0	1.0	0.0	0.0	0.0	0.0	0.0	0.0	0.0	0.0	0.0	0.0
ENSG00000185972	881	ensembl_gene_id	H. sapiens	881	H. sapiens	CCIN	calicin	GO:0007283 spermatogenesis;GO:0048232 male gamete generation;GO:0007276 gamete generation							0.0	0.0	0.0	0.0	0.0	0.0	0.0	0.0	0.0	0.0	0.0	0.0	0.0	0.0	0.0	0.0	0.0	0.0	0.0	0.0
ENSG00000167363	64122	ensembl_gene_id	H. sapiens	64122	H. sapiens	FN3K	fructosamine 3 kinase	GO:0030393 fructoselysine metabolic process;GO:0030389 fructosamine metabolic process;GO:0036525 protein deglycation			Mitochondria(Approved)			(M5945)HALLMARK HEME METABOLISM	0.0	0.0	0.0	0.0	0.0	0.0	0.0	0.0	0.0	0.0	0.0	0.0	0.0	0.0	0.0	0.0	1.0	0.0	0.0	0.0
ENSG00000115758	4953	ensembl_gene_id	H. sapiens	4953	H. sapiens	ODC1	ornithine decarboxylase 1	GO:0033387 putrescine biosynthetic process from ornithine;GO:0009446 putrescine biosynthetic process;GO:0009445 putrescine metabolic process		Enzymes/ENZYME proteins/Lyases	Cytosol;Plasma membrane(Approved)	Pyridoxal Phosphate (Protein homodimerization activity);Spermine (Protein homodimerization activity);Putrescine (Protein homodimerization activity);Pyridoxine-5'-Phosphate (Protein homodimerization activity);N-Pyridoxyl-Glycine-5-Monophosphate (Protein homodimerization activity);Alpha-Difluoromethylornithine (Protein homodimerization activity);N'-Pyridoxyl-Lysine-5'-Monophosphate (Protein homodim…	(M66)PID MYC ACTIV PATHWAY	(M5935)HALLMARK FATTY ACID METABOLISM; (M5947)HALLMARK IL2 STAT5 SIGNALING; (M5901)HALLMARK G2M CHECKPOINT	0.0	1.0	0.0	0.0	0.0	0.0	0.0	0.0	0.0	0.0	0.0	0.0	0.0	0.0	0.0	0.0	0.0	0.0	0.0	0.0
ENSG00000275342	157285	ensembl_gene_id	H. sapiens	157285	H. sapiens	PRAG1	PEAK1 related, kinase-activating pseudokinase 1	GO:0035025 positive regulation of Rho protein signal transduction;GO:0010977 negative regulation of neuron projection development;GO:0046579 positive regulation of Ras protein signal transduction	Other	Enzymes/{ENZYME proteins/Transferases,Kinases}	Centrosome;Cytosol;Nucleoplasm(Approved)				0.0	0.0	0.0	0.0	0.0	0.0	1.0	0.0	0.0	0.0	0.0	0.0	0.0	0.0	0.0	0.0	0.0	0.0	0.0	0.0
ENSG00000258429	64146	ensembl_gene_id	H. sapiens	64146	H. sapiens	PDF	peptide deformylase, mitochondrial	GO:0018206 peptidyl-methionine modification;GO:0031365 N-terminal protein amino acid modification;GO:0008284 positive regulation of cell proliferation		Enzymes/ENZYME proteins/Hydrolases	Mitochondria;Nucleoplasm(Approved)	2-[(Formyl-Hydroxy-Amino)-Methyl]-Heptanoic Acid [1-(2-Hydroxymethyl-Pyrrolidine-1-Carbonyl)-2-Methyl-Propyl]-Amide (Peptide deformylase activity);Bb-3497 (Peptide deformylase activity)			0.0	0.0	0.0	0.0	0.0	0.0	0.0	0.0	0.0	0.0	0.0	0.0	0.0	0.0	0.0	0.0	0.0	0.0	0.0	0.0
ENSG00000197329	57162	ensembl_gene_id	H. sapiens	57162	H. sapiens	PELI1	pellino E3 ubiquitin protein ligase 1	GO:0034141 positive regulation of toll-like receptor 3 signaling pathway;GO:0034145 positive regulation of toll-like receptor 4 signaling pathway;GO:0034139 regulation of toll-like receptor 3 signaling pathway		Enzymes/ENZYME proteins/Transferases	Intermediate filaments;Nucleoli;Nucleus(Approved)			(M5913)HALLMARK INTERFERON GAMMA RESPONSE	0.0	0.0	1.0	0.0	0.0	0.0	0.0	0.0	0.0	0.0	1.0	0.0	0.0	0.0	0.0	0.0	0.0	0.0	0.0	0.0
ENSG00000104848	3743	ensembl_gene_id	H. sapiens	3743	H. sapiens	KCNA7	potassium voltage-gated channel subfamily A member 7	GO:0071805 potassium ion transmembrane transport;GO:0071804 cellular potassium ion transport;GO:0051260 protein homooligomerization		Voltage-gated ion channels/Voltage-Gated Potassium Channels		Dalfampridine (Delayed rectifier potassium channel activity)			0.0	0.0	0.0	0.0	0.0	0.0	0.0	0.0	0.0	0.0	0.0	0.0	0.0	0.0	0.0	0.0	0.0	0.0	0.0	0.0
ENSG00000169933	9758	ensembl_gene_id	H. sapiens	9758	H. sapiens	FRMPD4	FERM and PDZ domain containing 4	GO:0051835 positive regulation of synapse structural plasticity;GO:0051823 regulation of synapse structural plasticity;GO:0098974 postsynaptic actin cytoskeleton organization							0.0	0.0	0.0	0.0	0.0	0.0	0.0	0.0	0.0	0.0	0.0	0.0	0.0	0.0	0.0	0.0	0.0	0.0	0.0	0.0
ENSG00000104783	3783	ensembl_gene_id	H. sapiens	3783	H. sapiens	KCNN4	potassium calcium-activated channel subfamily N member 4	GO:0050862 positive regulation of T cell receptor signaling pathway;GO:0050857 positive regulation of antigen receptor-mediated signaling pathway;GO:0050856 regulation of T cell receptor signaling pathway		Transporters/Transporter channels and pores;Voltage-gated ion channels/Calcium-Activated Potassium Channels		Enflurane (Protein phosphatase binding);Clotrimazole (Protein phosphatase binding);Quinine (Protein phosphatase binding);Miconazole (Protein phosphatase binding);Halothane (Protein phosphatase binding)		(M5953)HALLMARK KRAS SIGNALING UP	0.0	0.0	0.0	0.0	0.0	0.0	1.0	0.0	0.0	1.0	0.0	0.0	0.0	0.0	0.0	0.0	0.0	0.0	0.0	0.0
ENSG00000126368	9572	ensembl_gene_id	H. sapiens	9572	H. sapiens	NR1D1	nuclear receptor subfamily 1 group D member 1	GO:0034144 negative regulation of toll-like receptor 4 signaling pathway;GO:0061889 negative regulation of astrocyte activation;GO:0070859 positive regulation of bile acid biosynthetic process		Nuclear receptors;Transcription factors/Zinc-coordinating DNA-binding domains	Nuclear bodies(Supported)		(M95)PID CIRCADIAN PATHWAY		0.0	0.0	1.0	0.0	0.0	0.0	0.0	0.0	0.0	1.0	0.0	0.0	0.0	1.0	0.0	0.0	0.0	0.0	0.0	0.0
ENSG00000251493	2297	ensembl_gene_id	H. sapiens	2297	H. sapiens	FOXD1	forkhead box D1	GO:0060678 dichotomous subdivision of terminal units involved in ureteric bud branching;GO:0072267 metanephric capsule specification;GO:0072130 renal capsule specification		Transcription factors/Helix-turn-helix domains					0.0	1.0	0.0	0.0	0.0	0.0	1.0	0.0	1.0	0.0	0.0	0.0	0.0	0.0	0.0	0.0	0.0	0.0	1.0	0.0
ENSG00000186193	89958	ensembl_gene_id	H. sapiens	89958	H. sapiens	SAPCD2	suppressor APC domain containing 2	GO:1904777 negative regulation of protein localization to cell cortex;GO:1904776 regulation of protein localization to cell cortex;GO:0098725 symmetric cell division			Cytosol;Nucleoli;Nucleus(Supported)				0.0	1.0	0.0	0.0	0.0	0.0	0.0	0.0	0.0	0.0	0.0	0.0	0.0	0.0	0.0	0.0	0.0	0.0	0.0	0.0
ENSG00000197915	388697	ensembl_gene_id	H. sapiens	388697	H. sapiens	HRNR	hornerin	GO:0043163 cell envelope organization;GO:0061436 establishment of skin barrier;GO:0033561 regulation of water loss via skin			Mitochondria(Approved)		(M5883)NABA SECRETED FACTORS; (M5885)NABA MATRISOME ASSOCIATED; (M5889)NABA MATRISOME		0.0	0.0	0.0	0.0	0.0	0.0	0.0	0.0	0.0	1.0	0.0	0.0	0.0	0.0	1.0	0.0	1.0	0.0	0.0	0.0
ENSG00000105808	10156	ensembl_gene_id	H. sapiens	10156	H. sapiens	RASA4	RAS p21 protein activator 4	GO:0034260 negative regulation of GTPase activity;GO:0046580 negative regulation of Ras protein signal transduction;GO:0051058 negative regulation of small GTPase mediated signal transduction		RAS pathway related proteins	Vesicles(Uncertain)		(M269)PID RAS PATHWAY		0.0	0.0	0.0	0.0	0.0	0.0	0.0	0.0	0.0	0.0	0.0	0.0	0.0	1.0	0.0	0.0	0.0	0.0	0.0	0.0
ENSG00000171992	11346	ensembl_gene_id	H. sapiens	11346	H. sapiens	SYNPO	synaptopodin	GO:0099588 positive regulation of postsynaptic cytosolic calcium concentration;GO:0098886 modification of dendritic spine;GO:0099566 regulation of postsynaptic cytosolic calcium ion concentration			Actin filaments;Cytosol;Nucleoplasm(Approved)			(M5893)HALLMARK MITOTIC SPINDLE; (M5956)HALLMARK KRAS SIGNALING DN	0.0	0.0	0.0	0.0	0.0	0.0	0.0	0.0	0.0	0.0	0.0	0.0	0.0	0.0	0.0	0.0	0.0	0.0	0.0	0.0
ENSG00000116711	5321	ensembl_gene_id	H. sapiens	5321	H. sapiens	PLA2G4A	phospholipase A2 group IVA	GO:0006663 platelet activating factor biosynthetic process;GO:0035965 cardiolipin acyl-chain remodeling;GO:0050482 arachidonic acid secretion		Enzymes/ENZYME proteins/Hydrolases;RAS pathway related proteins	Cytosol(Supported)	Fluticasone Propionate (Phospholipase a2 activity);Quinacrine (Phospholipase a2 activity);Niflumic Acid (Phospholipase a2 activity)	(M229)PID P38 ALPHA BETA DOWNSTREAM PATHWAY; (M7)PID FCER1 PATHWAY; (M8)PID ENDOTHELIN PATHWAY	(M5921)HALLMARK COMPLEMENT; (M5913)HALLMARK INTERFERON GAMMA RESPONSE	0.0	0.0	0.0	0.0	0.0	0.0	0.0	0.0	0.0	0.0	0.0	0.0	0.0	0.0	0.0	0.0	0.0	0.0	0.0	0.0
ENSG00000164070	22824	ensembl_gene_id	H. sapiens	22824	H. sapiens	HSPA4L	heat shock protein family A (Hsp70) member 4 like	GO:0006986 response to unfolded protein;GO:0035966 response to topologically incorrect protein;GO:0006457 protein folding			Centrosome;Cytosol(Approved)			(M5951)HALLMARK SPERMATOGENESIS; (M5939)HALLMARK P53 PATHWAY; (M5907)HALLMARK ESTROGEN RESPONSE LATE	0.0	0.0	0.0	0.0	0.0	0.0	0.0	0.0	0.0	0.0	0.0	0.0	0.0	0.0	0.0	0.0	0.0	0.0	0.0	0.0
ENSG00000164161	64399	ensembl_gene_id	H. sapiens	64399	H. sapiens	HHIP	hedgehog interacting protein	GO:0060441 epithelial tube branching involved in lung morphogenesis;GO:0040036 regulation of fibroblast growth factor receptor signaling pathway;GO:0045879 negative regulation of smoothened signaling pathway			Nucleoplasm(Approved)		(M211)PID HEDGEHOG 2PATHWAY; (M5883)NABA SECRETED FACTORS; (M5885)NABA MATRISOME ASSOCIATED		0.0	1.0	0.0	0.0	0.0	0.0	0.0	0.0	1.0	0.0	0.0	1.0	1.0	0.0	1.0	0.0	0.0	0.0	0.0	0.0
ENSG00000204767	100131897	ensembl_gene_id	H. sapiens	100131897	H. sapiens	INSYN2B	inhibitory synaptic factor family member 2B								0.0	0.0	0.0	0.0	0.0	0.0	0.0	0.0	0.0	0.0	0.0	0.0	0.0	0.0	0.0	0.0	0.0	0.0	0.0	0.0
ENSG00000137266	63027	ensembl_gene_id	H. sapiens	63027	H. sapiens	SLC22A23	solute carrier family 22 member 23	GO:0006811 ion transport;GO:0055085 transmembrane transport;GO:0006810 transport		Transporters/Electrochemical Potential-driven transporters	Cytosol;Nucleoplasm;Vesicles(Approved)				0.0	0.0	0.0	0.0	0.0	0.0	0.0	0.0	0.0	0.0	0.0	0.0	0.0	0.0	0.0	0.0	0.0	0.0	0.0	0.0
ENSG00000171914	83660	ensembl_gene_id	H. sapiens	83660	H. sapiens	TLN2	talin 2	GO:0007016 cytoskeletal anchoring at plasma membrane;GO:0032507 maintenance of protein location in cell;GO:0007043 cell-cell junction assembly			Cytosol;Focal adhesion sites(Supported)		(M3270)ST INTEGRIN SIGNALING PATHWAY		0.0	0.0	0.0	0.0	0.0	0.0	0.0	0.0	0.0	0.0	0.0	0.0	0.0	0.0	0.0	0.0	0.0	0.0	0.0	0.0
ENSG00000124766	6659	ensembl_gene_id	H. sapiens	6659	H. sapiens	SOX4	SRY-box transcription factor 4	GO:2000761 positive regulation of N-terminal peptidyl-lysine acetylation;GO:0006977 DNA damage response, signal transduction by p53 class mediator resulting in cell cycle arrest;GO:2000759 regulation of N-terminal peptidyl-lysine acetylation		Transcription factors/Other all-alpha-helical DNA-binding domains	Nucleoplasm(Supported)Mitochondria(Approved)				0.0	1.0	1.0	0.0	0.0	1.0	0.0	0.0	0.0	0.0	1.0	0.0	1.0	1.0	0.0	1.0	1.0	0.0	0.0	0.0
ENSG00000156463	153769	ensembl_gene_id	H. sapiens	153769	H. sapiens	SH3RF2	SH3 domain containing ring finger 2	GO:0046329 negative regulation of JNK cascade;GO:0032436 positive regulation of proteasomal ubiquitin-dependent protein catabolic process;GO:0032873 negative regulation of stress-activated MAPK cascade		Enzymes/ENZYME proteins/Transferases	Nucleoplasm(Approved)				1.0	0.0	0.0	1.0	0.0	0.0	0.0	0.0	0.0	0.0	0.0	0.0	0.0	1.0	0.0	0.0	0.0	0.0	0.0	0.0
ENSG00000180884	126375	ensembl_gene_id	H. sapiens	126375	H. sapiens	ZNF792	zinc finger protein 792	GO:0006355 regulation of transcription, DNA-templated;GO:1903506 regulation of nucleic acid-templated transcription;GO:0006351 transcription, DNA-templated		Transcription factors/Zinc-coordinating DNA-binding domains	Nuclear bodies;Nucleoplasm(Approved)				0.0	0.0	0.0	0.0	0.0	0.0	0.0	0.0	0.0	0.0	0.0	0.0	0.0	0.0	0.0	0.0	0.0	0.0	0.0	0.0
ENSG00000144199	151313	ensembl_gene_id	H. sapiens	151313	H. sapiens	FAHD2B	fumarylacetoacetate hydrolase domain containing 2B								0.0	0.0	0.0	0.0	0.0	0.0	0.0	0.0	0.0	0.0	0.0	0.0	0.0	0.0	0.0	0.0	0.0	0.0	0.0	0.0
ENSG00000011422	5329	ensembl_gene_id	H. sapiens	5329	H. sapiens	PLAUR	plasminogen activator, urokinase receptor	GO:2001268 negative regulation of cysteine-type endopeptidase activity involved in apoptotic signaling pathway;GO:0042730 fibrinolysis;GO:0034112 positive regulation of homotypic cell-cell adhesion		CD markers	Plasma membrane(Supported)	Alteplase (Urokinase plasminogen activator receptor activity);Urokinase (Urokinase plasminogen activator receptor activity);Reteplase (Urokinase plasminogen activator receptor activity);Anistreplase (Urokinase plasminogen activator receptor activity);Tenecteplase (Urokinase plasminogen activator receptor activity);WX-UK1 (Urokinase plasminogen activator receptor activity)	(M120)PID ARF6 DOWNSTREAM PATHWAY; (M212)PID INTEGRIN5 PATHWAY; (M169)PID INTEGRIN2 PATHWAY	(M5916)HALLMARK APICAL SURFACE; (M5892)HALLMARK CHOLESTEROL HOMEOSTASIS; (M5932)HALLMARK INFLAMMATORY RESPONSE	0.0	0.0	1.0	0.0	0.0	0.0	1.0	0.0	0.0	1.0	0.0	1.0	0.0	1.0	0.0	1.0	0.0	0.0	0.0	0.0
ENSG00000131188	80758	ensembl_gene_id	H. sapiens	80758	H. sapiens	PRR7	proline rich 7, synaptic	GO:2001269 positive regulation of cysteine-type endopeptidase activity involved in apoptotic signaling pathway;GO:2001267 regulation of cysteine-type endopeptidase activity involved in apoptotic signaling pathway;GO:0099527 postsynapse to nucleus signaling pathway			Cytosol;Nucleoplasm;Plasma membrane(Approved)				0.0	0.0	1.0	0.0	0.0	0.0	0.0	0.0	0.0	0.0	0.0	0.0	0.0	1.0	0.0	1.0	0.0	0.0	0.0	0.0
ENSG00000143217	81607	ensembl_gene_id	H. sapiens	81607	H. sapiens	NECTIN4	nectin cell adhesion molecule 4	GO:0046718 viral entry into host cell;GO:0030260 entry into host cell;GO:0051806 entry into cell of other organism involved in symbiotic interaction			Plasma membrane(Supported)			(M5915)HALLMARK APICAL JUNCTION	0.0	0.0	0.0	0.0	0.0	0.0	0.0	0.0	0.0	0.0	0.0	0.0	0.0	0.0	0.0	0.0	0.0	0.0	0.0	0.0
ENSG00000180233	223082	ensembl_gene_id	H. sapiens	223082	H. sapiens	ZNRF2	zinc and ring finger 2	GO:0000209 protein polyubiquitination;GO:0016567 protein ubiquitination;GO:0032446 protein modification by small protein conjugation		Enzymes/ENZYME proteins/Transferases					0.0	0.0	0.0	0.0	0.0	0.0	0.0	0.0	0.0	0.0	0.0	0.0	0.0	0.0	0.0	0.0	0.0	0.0	0.0	0.0
ENSG00000077238	3566	ensembl_gene_id	H. sapiens	3566	H. sapiens	IL4R	interleukin 4 receptor	GO:0045626 negative regulation of T-helper 1 cell differentiation;GO:0045630 positive regulation of T-helper 2 cell differentiation;GO:0045625 regulation of T-helper 1 cell differentiation		CD markers		AER001 (Receptor signaling protein activity)	(M17580)ST IL 13 PATHWAY; (M9378)ST INTERLEUKIN 4 PATHWAY; (M1718)SIG IL4RECEPTOR IN B LYPHOCYTES	(M5897)HALLMARK IL6 JAK STAT3 SIGNALING; (M5911)HALLMARK INTERFERON ALPHA RESPONSE; (M5947)HALLMARK IL2 STAT5 SIGNALING	0.0	0.0	1.0	0.0	0.0	0.0	0.0	0.0	0.0	0.0	0.0	0.0	0.0	0.0	0.0	0.0	0.0	1.0	0.0	0.0
ENSG00000102804	8848	ensembl_gene_id	H. sapiens	8848	H. sapiens	TSC22D1	TSC22 domain family member 1	GO:0006357 regulation of transcription by RNA polymerase II;GO:0006366 transcription by RNA polymerase II;GO:0006355 regulation of transcription, DNA-templated		Transcription factors/Basic domains	Nuclear bodies;Nucleoplasm(Approved)			(M5908)HALLMARK ANDROGEN RESPONSE; (M5939)HALLMARK P53 PATHWAY; (M5890)HALLMARK TNFA SIGNALING VIA NFKB	0.0	0.0	0.0	0.0	0.0	0.0	0.0	0.0	0.0	0.0	0.0	0.0	0.0	0.0	0.0	0.0	0.0	0.0	0.0	0.0
ENSG00000159399	3099	ensembl_gene_id	H. sapiens	3099	H. sapiens	HK2	hexokinase 2	GO:0061621 canonical glycolysis;GO:0061620 glycolytic process through glucose-6-phosphate;GO:0061615 glycolytic process through fructose-6-phosphate		Enzymes/ENZYME proteins/Transferases			(M255)PID HIF1 TFPATHWAY	(M5928)HALLMARK MYC TARGETS V2; (M5947)HALLMARK IL2 STAT5 SIGNALING; (M5891)HALLMARK HYPOXIA	0.0	0.0	0.0	0.0	0.0	1.0	0.0	0.0	0.0	1.0	0.0	0.0	0.0	0.0	0.0	0.0	0.0	0.0	0.0	0.0
ENSG00000134107	8553	ensembl_gene_id	H. sapiens	8553	H. sapiens	BHLHE40	basic helix-loop-helix family member e40	GO:0043153 entrainment of circadian clock by photoperiod;GO:0009649 entrainment of circadian clock;GO:0009648 photoperiodism		Transcription factors/Basic domains	Nuclear bodies(Supported)		(M95)PID CIRCADIAN PATHWAY; (M44)PID HIF2PATHWAY; (M255)PID HIF1 TFPATHWAY	(M5942)HALLMARK UV RESPONSE DN; (M5947)HALLMARK IL2 STAT5 SIGNALING; (M5891)HALLMARK HYPOXIA	0.0	0.0	0.0	0.0	0.0	0.0	0.0	0.0	0.0	0.0	0.0	0.0	0.0	0.0	0.0	0.0	0.0	0.0	0.0	0.0
ENSG00000100036	339665	ensembl_gene_id	H. sapiens	339665	H. sapiens	SLC35E4	solute carrier family 35 member E4	GO:0090481 pyrimidine nucleotide-sugar transmembrane transport;GO:0015780 nucleotide-sugar transmembrane transport;GO:1901264 carbohydrate derivative transport		Transporters/Electrochemical Potential-driven transporters	Cytosol(Approved)				0.0	0.0	0.0	0.0	0.0	0.0	0.0	0.0	0.0	0.0	0.0	0.0	0.0	0.0	0.0	0.0	0.0	0.0	0.0	0.0
ENSG00000145632	10769	ensembl_gene_id	H. sapiens	10769	H. sapiens	PLK2	polo like kinase 2	GO:0006977 DNA damage response, signal transduction by p53 class mediator resulting in cell cycle arrest;GO:0072431 signal transduction involved in mitotic G1 DNA damage checkpoint;GO:0090050 positive regulation of cell migration involved in sprouting angiogenesis	Other	Enzymes/{ENZYME proteins/Transferases,Kinases}	Cytosol;Mitochondria;Nucleoplasm(Approved)			(M5939)HALLMARK P53 PATHWAY; (M5890)HALLMARK TNFA SIGNALING VIA NFKB	1.0	0.0	0.0	0.0	0.0	1.0	1.0	0.0	0.0	0.0	0.0	0.0	0.0	0.0	0.0	0.0	0.0	0.0	0.0	0.0
ENSG00000173376	79625	ensembl_gene_id	H. sapiens	79625	H. sapiens	NDNF	neuron derived neurotrophic factor	GO:0061042 vascular wound healing;GO:0019800 peptide cross-linking via chondroitin 4-sulfate glycosaminoglycan;GO:0060055 angiogenesis involved in wound healing			Vesicles(Supported)		(M3008)NABA ECM GLYCOPROTEINS; (M5884)NABA CORE MATRISOME; (M5889)NABA MATRISOME		0.0	0.0	1.0	0.0	0.0	1.0	1.0	1.0	0.0	1.0	0.0	0.0	0.0	0.0	0.0	0.0	0.0	0.0	0.0	0.0
ENSG00000120217	29126	ensembl_gene_id	H. sapiens	29126	H. sapiens	CD274	CD274 molecule	GO:0002845 positive regulation of tolerance induction to tumor cell;GO:1905404 positive regulation of activated CD8-positive, alpha-beta T cell apoptotic process;GO:0002843 regulation of tolerance induction to tumor cell		CD markers	Cytosol(Approved)	Atezolizumab		(M5913)HALLMARK INTERFERON GAMMA RESPONSE; (M5915)HALLMARK APICAL JUNCTION	1.0	0.0	1.0	0.0	0.0	0.0	0.0	0.0	0.0	0.0	1.0	0.0	0.0	0.0	0.0	1.0	0.0	0.0	0.0	0.0
ENSG00000187605	200424	ensembl_gene_id	H. sapiens	200424	H. sapiens	TET3	tet methylcytosine dioxygenase 3	GO:0044727 DNA demethylation of male pronucleus;GO:0044725 chromatin reprogramming in the zygote;GO:0043045 DNA methylation involved in embryo development		Enzymes/ENZYME proteins/Oxidoreductases	Cytosol;Nucleoplasm;Vesicles(Approved)				0.0	0.0	0.0	0.0	0.0	0.0	0.0	0.0	0.0	0.0	0.0	0.0	0.0	0.0	0.0	0.0	0.0	0.0	0.0	0.0
ENSG00000033178	55236	ensembl_gene_id	H. sapiens	55236	H. sapiens	UBA6	ubiquitin like modifier activating enzyme 6	GO:0021764 amygdala development;GO:0021766 hippocampus development;GO:0060996 dendritic spine development		Enzymes/ENZYME proteins/Ligase	Cytosol;Nucleoplasm(Enhanced)				0.0	0.0	0.0	0.0	0.0	0.0	0.0	0.0	0.0	0.0	0.0	0.0	0.0	0.0	0.0	0.0	0.0	0.0	0.0	0.0
ENSG00000119514	79695	ensembl_gene_id	H. sapiens	79695	H. sapiens	GALNT12	polypeptide N-acetylgalactosaminyltransferase 12	GO:0016266 O-glycan processing;GO:0006493 protein O-linked glycosylation;GO:0006486 protein glycosylation		Enzymes/ENZYME proteins/Transferases					0.0	0.0	0.0	0.0	0.0	0.0	0.0	0.0	0.0	0.0	0.0	0.0	0.0	0.0	0.0	0.0	0.0	0.0	0.0	0.0
ENSG00000134253	80263	ensembl_gene_id	H. sapiens	80263	H. sapiens	TRIM45	tripartite motif containing 45	GO:0060348 bone development;GO:0001501 skeletal system development;GO:0048513 animal organ development			Cytokinetic bridge;Cytosol(Supported)				0.0	0.0	0.0	0.0	0.0	0.0	0.0	0.0	0.0	0.0	0.0	0.0	1.0	0.0	0.0	0.0	0.0	0.0	0.0	0.0
ENSG00000184254	220	ensembl_gene_id	H. sapiens	220	H. sapiens	ALDH1A3	aldehyde dehydrogenase 1 family member A3	GO:0021768 nucleus accumbens development;GO:0002072 optic cup morphogenesis involved in camera-type eye development;GO:0002138 retinoic acid biosynthetic process		Enzymes/ENZYME proteins/Oxidoreductases	Cytosol;Nucleus(Enhanced)	NADH (Thyroid hormone binding);Vitamin A (Thyroid hormone binding)		(M5908)HALLMARK ANDROGEN RESPONSE; (M5953)HALLMARK KRAS SIGNALING UP	0.0	1.0	0.0	0.0	0.0	0.0	0.0	0.0	0.0	0.0	0.0	0.0	0.0	0.0	0.0	1.0	0.0	0.0	0.0	0.0
ENSG00000135363	4005	ensembl_gene_id	H. sapiens	4005	H. sapiens	LMO2	LIM domain only 2	GO:1902036 regulation of hematopoietic stem cell differentiation;GO:0097067 cellular response to thyroid hormone stimulus;GO:0042789 mRNA transcription by RNA polymerase II			Cytosol;Nucleoplasm(Approved)			(M5957)HALLMARK PANCREAS BETA CELLS; (M5945)HALLMARK HEME METABOLISM	0.0	0.0	1.0	0.0	0.0	0.0	0.0	0.0	0.0	0.0	0.0	0.0	0.0	0.0	0.0	0.0	0.0	0.0	0.0	0.0
ENSG00000120549	56243	ensembl_gene_id	H. sapiens	56243	H. sapiens	KIAA1217	KIAA1217	GO:0048706 embryonic skeletal system development;GO:0043009 chordate embryonic development;GO:0001501 skeletal system development			Cytosol;Nucleus(Approved)				0.0	0.0	0.0	0.0	0.0	0.0	0.0	0.0	0.0	0.0	0.0	0.0	1.0	0.0	0.0	0.0	0.0	0.0	0.0	0.0
ENSG00000115290	2888	ensembl_gene_id	H. sapiens	2888	H. sapiens	GRB14	growth factor receptor bound protein 14	GO:0046627 negative regulation of insulin receptor signaling pathway;GO:1900077 negative regulation of cellular response to insulin stimulus;GO:0046626 regulation of insulin receptor signaling pathway			Cytosol;Nucleoplasm(Approved)		(M16)PID INSULIN PATHWAY; (M92)PID ANGIOPOIETIN RECEPTOR PATHWAY		0.0	0.0	0.0	0.0	0.0	0.0	0.0	0.0	0.0	0.0	0.0	1.0	0.0	0.0	0.0	0.0	0.0	0.0	0.0	0.0
ENSG00000138771	57619	ensembl_gene_id	H. sapiens	57619	H. sapiens	SHROOM3	shroom family member 3	GO:0001843 neural tube closure;GO:0043482 cellular pigment accumulation;GO:0014020 primary neural tube formation							0.0	1.0	0.0	0.0	0.0	0.0	0.0	0.0	0.0	0.0	0.0	0.0	0.0	0.0	0.0	0.0	1.0	0.0	0.0	0.0
ENSG00000164949	2669	ensembl_gene_id	H. sapiens	2669	H. sapiens	GEM	GTP binding protein overexpressed in skeletal muscle	GO:1901842 negative regulation of high voltage-gated calcium channel activity;GO:1901841 regulation of high voltage-gated calcium channel activity;GO:1901386 negative regulation of voltage-gated calcium channel activity						(M5930)HALLMARK EPITHELIAL MESENCHYMAL TRANSITION; (M5890)HALLMARK TNFA SIGNALING VIA NFKB	0.0	0.0	0.0	0.0	0.0	0.0	0.0	0.0	0.0	0.0	0.0	0.0	0.0	0.0	0.0	0.0	0.0	0.0	0.0	0.0
ENSG00000166592	6236	ensembl_gene_id	H. sapiens	6236	H. sapiens	RRAD	RRAD, Ras related glycolysis inhibitor and calcium channel regulator	GO:1901842 negative regulation of high voltage-gated calcium channel activity;GO:1901841 regulation of high voltage-gated calcium channel activity;GO:1901386 negative regulation of voltage-gated calcium channel activity			Golgi apparatus;Nucleoplasm;Plasma membrane(Approved)		(M236)PID DELTA NP63 PATHWAY	(M5941)HALLMARK UV RESPONSE UP; (M5939)HALLMARK P53 PATHWAY	0.0	0.0	0.0	0.0	0.0	0.0	0.0	0.0	0.0	0.0	0.0	1.0	0.0	0.0	0.0	0.0	0.0	0.0	0.0	0.0
ENSG00000141068	8844	ensembl_gene_id	H. sapiens	8844	H. sapiens	KSR1	kinase suppressor of ras 1	GO:0000185 activation of MAPKKK activity;GO:0043406 positive regulation of MAP kinase activity;GO:0071902 positive regulation of protein serine/threonine kinase activity	TKL Ser/Thr protein kinase family	Enzymes/Kinases/TKL Ser/Thr protein kinases;RAS pathway related proteins			(M144)PID CERAMIDE PATHWAY; (M164)PID ERBB1 DOWNSTREAM PATHWAY; (M186)PID PDGFRB PATHWAY		0.0	0.0	0.0	1.0	0.0	0.0	0.0	0.0	0.0	0.0	0.0	0.0	0.0	0.0	0.0	0.0	0.0	0.0	0.0	0.0
ENSG00000058085	3918	ensembl_gene_id	H. sapiens	3918	H. sapiens	LAMC2	laminin subunit gamma 2	GO:0008045 motor neuron axon guidance;GO:0031581 hemidesmosome assembly;GO:0007411 axon guidance			Cytosol(Approved)		(M158)PID INTEGRIN4 PATHWAY; (M5887)NABA BASEMENT MEMBRANES; (M239)PID A6B1 A6B4 INTEGRIN PATHWAY	(M5915)HALLMARK APICAL JUNCTION; (M5907)HALLMARK ESTROGEN RESPONSE LATE; (M5930)HALLMARK EPITHELIAL MESENCHYMAL TRANSITION	1.0	0.0	0.0	0.0	0.0	0.0	1.0	1.0	0.0	0.0	0.0	1.0	0.0	0.0	0.0	0.0	1.0	0.0	0.0	0.0
ENSG00000198932	9737	ensembl_gene_id	H. sapiens	9737	H. sapiens	GPRASP1	G protein-coupled receptor associated sorting protein 1	GO:1990172 G protein-coupled receptor catabolic process;GO:0032801 receptor catabolic process;GO:0008333 endosome to lysosome transport			Cytosol(Supported)				0.0	0.0	0.0	0.0	0.0	0.0	0.0	0.0	0.0	0.0	0.0	0.0	0.0	0.0	0.0	0.0	0.0	0.0	0.0	0.0
ENSG00000150773	120379	ensembl_gene_id	H. sapiens	120379	H. sapiens	PIH1D2	PIH1 domain containing 2	GO:0000492 box C/D snoRNP assembly;GO:0000491 small nucleolar ribonucleoprotein complex assembly;GO:0006364 rRNA processing			Cytosol;Nucleoplasm(Uncertain)				0.0	0.0	0.0	0.0	0.0	0.0	0.0	0.0	0.0	0.0	0.0	0.0	0.0	0.0	0.0	0.0	0.0	0.0	0.0	0.0
ENSG00000084710	22979	ensembl_gene_id	H. sapiens	22979	H. sapiens	EFR3B	EFR3 homolog B	GO:0046854 phosphatidylinositol phosphorylation;GO:0046834 lipid phosphorylation;GO:0046488 phosphatidylinositol metabolic process							0.0	0.0	0.0	0.0	0.0	0.0	0.0	0.0	0.0	0.0	0.0	0.0	0.0	0.0	0.0	0.0	0.0	0.0	0.0	0.0
ENSG00000140332	7090	ensembl_gene_id	H. sapiens	7090	H. sapiens	TLE3	TLE family member 3, transcriptional corepressor	GO:0120163 negative regulation of cold-induced thermogenesis;GO:1904837 beta-catenin-TCF complex assembly;GO:0090090 negative regulation of canonical Wnt signaling pathway			Nucleoplasm(Supported)			(M5919)HALLMARK HEDGEHOG SIGNALING; (M5901)HALLMARK G2M CHECKPOINT	0.0	0.0	0.0	0.0	0.0	0.0	0.0	0.0	0.0	0.0	0.0	0.0	0.0	0.0	0.0	0.0	0.0	0.0	0.0	0.0
ENSG00000003249	79007	ensembl_gene_id	H. sapiens	79007	H. sapiens	DBNDD1	dysbindin domain containing 1				Cytosol;Nuclear speckles(Approved)				0.0	0.0	0.0	0.0	0.0	0.0	0.0	0.0	0.0	0.0	0.0	0.0	0.0	0.0	0.0	0.0	0.0	0.0	0.0	0.0
ENSG00000204396	80737	ensembl_gene_id	H. sapiens	80737	H. sapiens	VWA7	von Willebrand factor A domain containing 7	GO:0008150 biological_process			Cytosol;Plasma membrane(Approved)		(M3008)NABA ECM GLYCOPROTEINS; (M5884)NABA CORE MATRISOME; (M5889)NABA MATRISOME		0.0	0.0	0.0	0.0	0.0	0.0	0.0	1.0	0.0	0.0	0.0	0.0	0.0	0.0	0.0	0.0	0.0	0.0	0.0	0.0
ENSG00000260238	100527963	ensembl_gene_id	H. sapiens	100527963	H. sapiens	PMF1-BGLAP	PMF1-BGLAP readthrough				Nucleoplasm;Vesicles(Approved)				0.0	0.0	0.0	0.0	0.0	0.0	0.0	0.0	0.0	0.0	0.0	0.0	0.0	0.0	0.0	0.0	0.0	0.0	0.0	0.0
ENSG00000188766	399473	ensembl_gene_id	H. sapiens	399473	H. sapiens	SPRED3	sprouty related EVH1 domain containing 3	GO:0000188 inactivation of MAPK activity;GO:0043517 positive regulation of DNA damage response, signal transduction by p53 class mediator;GO:0010801 negative regulation of peptidyl-threonine phosphorylation			Cytosol;Nucleoplasm;Plasma membrane(Uncertain)				0.0	0.0	0.0	1.0	0.0	0.0	0.0	0.0	0.0	0.0	0.0	0.0	0.0	1.0	0.0	0.0	0.0	0.0	0.0	0.0
ENSG00000166546	146227	ensembl_gene_id	H. sapiens	146227	H. sapiens	BEAN1	brain expressed associated with NEDD4 1				Centrosome;Nucleoplasm(Uncertain)				0.0	0.0	0.0	0.0	0.0	0.0	0.0	0.0	0.0	0.0	0.0	0.0	0.0	0.0	0.0	0.0	0.0	0.0	0.0	0.0
ENSG00000013297	5010	ensembl_gene_id	H. sapiens	5010	H. sapiens	CLDN11	claudin 11	GO:0016338 calcium-independent cell-cell adhesion via plasma membrane cell-adhesion molecules;GO:0120192 tight junction assembly;GO:0120193 tight junction organization						(M5915)HALLMARK APICAL JUNCTION	0.0	0.0	0.0	0.0	0.0	0.0	0.0	0.0	0.0	0.0	0.0	0.0	0.0	0.0	0.0	0.0	0.0	0.0	0.0	0.0
ENSG00000197632	5055	ensembl_gene_id	H. sapiens	5055	H. sapiens	SERPINB2	serpin family B member 2	GO:0042730 fibrinolysis;GO:0035722 interleukin-12-mediated signaling pathway;GO:0030195 negative regulation of blood coagulation				Urokinase (Serine-type endopeptidase inhibitor activity);Tenecteplase (Serine-type endopeptidase inhibitor activity)	(M3468)NABA ECM REGULATORS; (M5885)NABA MATRISOME ASSOCIATED; (M5889)NABA MATRISOME	(M5946)HALLMARK COAGULATION; (M5956)HALLMARK KRAS SIGNALING DN; (M5921)HALLMARK COMPLEMENT	0.0	0.0	0.0	0.0	0.0	0.0	0.0	0.0	0.0	1.0	0.0	0.0	0.0	0.0	1.0	0.0	0.0	0.0	0.0	0.0
ENSG00000196843	10865	ensembl_gene_id	H. sapiens	10865	H. sapiens	ARID5A	AT-rich interaction domain 5A	GO:0071391 cellular response to estrogen stimulus;GO:0043627 response to estrogen;GO:0000122 negative regulation of transcription by RNA polymerase II		Transcription factors/Helix-turn-helix domains	Nucleus(Enhanced)Nucleoli(Supported)				0.0	0.0	0.0	0.0	0.0	0.0	0.0	0.0	0.0	0.0	0.0	0.0	0.0	0.0	0.0	0.0	0.0	0.0	0.0	0.0
ENSG00000136231	10643	ensembl_gene_id	H. sapiens	10643	H. sapiens	IGF2BP3	insulin like growth factor 2 mRNA binding protein 3	GO:0043488 regulation of mRNA stability;GO:0061013 regulation of mRNA catabolic process;GO:0042035 regulation of cytokine biosynthetic process			Cytosol(Enhanced)				0.0	0.0	0.0	0.0	0.0	0.0	0.0	0.0	0.0	0.0	0.0	0.0	0.0	0.0	0.0	0.0	0.0	0.0	0.0	0.0
ENSG00000162849	55083	ensembl_gene_id	H. sapiens	55083	H. sapiens	KIF26B	kinesin family member 26B	GO:0072092 ureteric bud invasion;GO:0072093 metanephric renal vesicle formation;GO:0060677 ureteric bud elongation			Microtubules;Plasma membrane(Approved)				0.0	1.0	1.0	0.0	0.0	0.0	1.0	0.0	0.0	0.0	0.0	0.0	0.0	0.0	0.0	0.0	0.0	0.0	0.0	0.0
ENSG00000173269	79812	ensembl_gene_id	H. sapiens	79812	H. sapiens	MMRN2	multimerin 2	GO:0090051 negative regulation of cell migration involved in sprouting angiogenesis;GO:1903671 negative regulation of sprouting angiogenesis;GO:0090049 regulation of cell migration involved in sprouting angiogenesis			Vesicles(Approved)		(M3008)NABA ECM GLYCOPROTEINS; (M5884)NABA CORE MATRISOME; (M5889)NABA MATRISOME		0.0	0.0	0.0	0.0	0.0	1.0	0.0	1.0	1.0	0.0	0.0	1.0	0.0	0.0	0.0	0.0	0.0	0.0	0.0	0.0
ENSG00000198846	9760	ensembl_gene_id	H. sapiens	9760	H. sapiens	TOX	thymocyte selection associated high mobility group box	GO:0002362 CD4-positive, CD25-positive, alpha-beta regulatory T cell lineage commitment;GO:0043375 CD8-positive, alpha-beta T cell lineage commitment;GO:0002364 NK T cell lineage commitment		Transcription factors/Other all-alpha-helical DNA-binding domains	Nucleoli fibrillar center;Nucleus(Approved)				0.0	0.0	1.0	0.0	0.0	0.0	1.0	0.0	0.0	0.0	0.0	0.0	0.0	0.0	0.0	0.0	0.0	0.0	0.0	0.0
ENSG00000177606	3725	ensembl_gene_id	H. sapiens	3725	H. sapiens	JUN	Jun proto-oncogene, AP-1 transcription factor subunit	GO:0045657 positive regulation of monocyte differentiation;GO:0043922 negative regulation by host of viral transcription;GO:1990441 negative regulation of transcription from RNA polymerase II promoter in response to endoplasmic reticulum stress		Transcription factors/Basic domains	Nucleoplasm(Enhanced)	Vinblastine (Transcriptional activator activity, rna polymerase ii transcription factor binding);Irbesartan (Transcriptional activator activity, rna polymerase ii transcription factor binding);Arsenic trioxide (Transcriptional activator activity, rna polymerase ii transcription factor binding);LGD-1550 (Transcriptional activator activity, rna polymerase ii transcription factor binding)	(M190)PID TCR JNK PATHWAY; (M206)PID PDGFRA PATHWAY; (M15743)ST GA12 PATHWAY	(M5897)HALLMARK IL6 JAK STAT3 SIGNALING; (M5902)HALLMARK APOPTOSIS; (M5891)HALLMARK HYPOXIA	1.0	0.0	1.0	1.0	0.0	1.0	1.0	0.0	1.0	1.0	1.0	0.0	0.0	1.0	0.0	1.0	1.0	0.0	0.0	0.0
ENSG00000112769	3910	ensembl_gene_id	H. sapiens	3910	H. sapiens	LAMA4	laminin subunit alpha 4	GO:0120163 negative regulation of cold-induced thermogenesis;GO:0120161 regulation of cold-induced thermogenesis;GO:0106106 cold-induced thermogenesis			Cytosol;Plasma membrane(Approved)		(M5887)NABA BASEMENT MEMBRANES; (M176)PID FOXM1 PATHWAY; (M53)PID INTEGRIN3 PATHWAY	(M5905)HALLMARK ADIPOGENESIS	0.0	0.0	1.0	0.0	0.0	0.0	0.0	1.0	0.0	0.0	0.0	1.0	0.0	0.0	0.0	0.0	0.0	0.0	0.0	0.0
ENSG00000167074	7008	ensembl_gene_id	H. sapiens	7008	H. sapiens	TEF	TEF transcription factor, PAR bZIP family member	GO:0045944 positive regulation of transcription by RNA polymerase II;GO:0048511 rhythmic process;GO:0045893 positive regulation of transcription, DNA-templated		Transcription factors/Basic domains					0.0	0.0	0.0	0.0	0.0	0.0	0.0	0.0	0.0	0.0	0.0	0.0	0.0	0.0	0.0	0.0	0.0	0.0	0.0	0.0
ENSG00000197147	23507	ensembl_gene_id	H. sapiens	23507	H. sapiens	LRRC8B	leucine rich repeat containing 8 VRAC subunit B	GO:0015698 inorganic anion transport;GO:0098656 anion transmembrane transport;GO:0006820 anion transport		Transporters/Transporter channels and pores	Nuclear speckles(Approved)				0.0	0.0	0.0	0.0	0.0	0.0	0.0	0.0	0.0	0.0	0.0	0.0	0.0	0.0	0.0	0.0	0.0	0.0	0.0	0.0
ENSG00000179869	154664	ensembl_gene_id	H. sapiens	154664	H. sapiens	ABCA13	ATP binding cassette subfamily A member 13	GO:0043312 neutrophil degranulation;GO:0002283 neutrophil activation involved in immune response;GO:0042119 neutrophil activation			Centrosome;Cytosol;Vesicles(Approved)				0.0	0.0	0.0	0.0	0.0	0.0	0.0	0.0	0.0	0.0	0.0	0.0	0.0	0.0	0.0	0.0	0.0	0.0	0.0	0.0
ENSG00000144583	57574	ensembl_gene_id	H. sapiens	57574	H. sapiens	MARCHF4	membrane associated ring-CH-type finger 4	GO:0016567 protein ubiquitination;GO:0032446 protein modification by small protein conjugation;GO:0070647 protein modification by small protein conjugation or removal		Enzymes/ENZYME proteins/Transferases					0.0	0.0	0.0	0.0	0.0	0.0	0.0	0.0	0.0	0.0	0.0	0.0	0.0	0.0	0.0	0.0	0.0	0.0	0.0	0.0
ENSG00000123612	130399	ensembl_gene_id	H. sapiens	130399	H. sapiens	ACVR1C	activin A receptor type 1C	GO:1901164 negative regulation of trophoblast cell migration;GO:0001834 trophectodermal cell proliferation;GO:1901383 negative regulation of chorionic trophoblast cell proliferation	TKL Ser/Thr protein kinase family	Enzymes/{ENZYME proteins/Transferases,Kinases/TKL Ser/Thr protein kinases}					0.0	0.0	0.0	0.0	0.0	1.0	1.0	0.0	1.0	0.0	1.0	0.0	0.0	0.0	0.0	1.0	0.0	0.0	0.0	0.0
ENSG00000143786	149111	ensembl_gene_id	H. sapiens	149111	H. sapiens	CNIH3	cornichon family AMPA receptor auxiliary protein 3	GO:0048208 COPII vesicle coating;GO:0048207 vesicle targeting, rough ER to cis-Golgi;GO:2000311 regulation of AMPA receptor activity							0.0	0.0	0.0	0.0	0.0	0.0	0.0	0.0	0.0	0.0	0.0	0.0	0.0	0.0	0.0	0.0	0.0	0.0	0.0	0.0
ENSG00000144749	26018	ensembl_gene_id	H. sapiens	26018	H. sapiens	LRIG1	leucine rich repeats and immunoglobulin like domains 1	GO:0032474 otolith morphogenesis;GO:0048840 otolith development;GO:0060384 innervation			Cytosol(Approved)		(M13)PID ERBB4 PATHWAY; (M214)PID ERBB1 INTERNALIZATION PATHWAY	(M5947)HALLMARK IL2 STAT5 SIGNALING; (M5906)HALLMARK ESTROGEN RESPONSE EARLY	0.0	0.0	0.0	0.0	0.0	0.0	0.0	0.0	0.0	0.0	0.0	1.0	0.0	0.0	0.0	0.0	0.0	0.0	0.0	0.0
ENSG00000011347	9066	ensembl_gene_id	H. sapiens	9066	H. sapiens	SYT7	synaptotagmin 7	GO:0099502 calcium-dependent activation of synaptic vesicle fusion;GO:0031632 positive regulation of synaptic vesicle fusion to presynaptic active zone membrane;GO:0090119 vesicle-mediated cholesterol transport							0.0	0.0	0.0	0.0	0.0	0.0	0.0	0.0	0.0	1.0	0.0	0.0	0.0	0.0	0.0	0.0	0.0	0.0	0.0	0.0
ENSG00000168646	8313	ensembl_gene_id	H. sapiens	8313	H. sapiens	AXIN2	axin 2	GO:0070602 regulation of centromeric sister chromatid cohesion;GO:0061181 regulation of chondrocyte development;GO:0032423 regulation of mismatch repair			Cytosol;Nucleus;Plasma membrane(Uncertain)		(M31)PID BETA CATENIN DEG PATHWAY; (M17761)ST WNT BETA CATENIN PATHWAY; (M200)PID ERA GENOMIC PATHWAY	(M5895)HALLMARK WNT BETA CATENIN SIGNALING	0.0	0.0	0.0	0.0	1.0	0.0	0.0	0.0	0.0	0.0	1.0	0.0	1.0	0.0	0.0	1.0	0.0	0.0	1.0	0.0
ENSG00000118898	5493	ensembl_gene_id	H. sapiens	5493	H. sapiens	PPL	periplakin	GO:0070268 cornification;GO:0031424 keratinization;GO:0045104 intermediate filament cytoskeleton organization			Plasma membrane(Supported)Cytosol;Nucleoplasm(Approved)				0.0	0.0	0.0	0.0	0.0	0.0	0.0	0.0	0.0	1.0	0.0	0.0	0.0	0.0	0.0	0.0	1.0	0.0	0.0	0.0
ENSG00000028137	7133	ensembl_gene_id	H. sapiens	7133	H. sapiens	TNFRSF1B	TNF receptor superfamily member 1B	GO:0003332 negative regulation of extracellular matrix constituent secretion;GO:1902339 positive regulation of apoptotic process involved in morphogenesis;GO:0002739 regulation of cytokine secretion involved in immune response		CD markers		Etanercept (Ubiquitin protein ligase binding)	(M11736)SA MMP CYTOKINE CONNECTION; (M18030)ST TUMOR NECROSIS FACTOR PATHWAY; (M128)PID TNF PATHWAY	(M5897)HALLMARK IL6 JAK STAT3 SIGNALING; (M5947)HALLMARK IL2 STAT5 SIGNALING; (M5953)HALLMARK KRAS SIGNALING UP	0.0	0.0	1.0	0.0	0.0	0.0	1.0	1.0	1.0	1.0	0.0	0.0	0.0	0.0	0.0	1.0	0.0	0.0	0.0	0.0
ENSG00000197919	3439	ensembl_gene_id	H. sapiens	3439	H. sapiens	IFNA1	interferon alpha 1	GO:0033141 positive regulation of peptidyl-serine phosphorylation of STAT protein;GO:0033139 regulation of peptidyl-serine phosphorylation of STAT protein;GO:0042501 serine phosphorylation of STAT protein					(M272)PID CD8 TCR DOWNSTREAM PATHWAY; (M5883)NABA SECRETED FACTORS; (M5885)NABA MATRISOME ASSOCIATED		0.0	0.0	1.0	0.0	0.0	0.0	0.0	0.0	0.0	1.0	0.0	0.0	0.0	0.0	1.0	0.0	0.0	0.0	0.0	0.0
ENSG00000162746	127943	ensembl_gene_id	H. sapiens	127943	H. sapiens	FCRLB	Fc receptor like B	GO:0050777 negative regulation of immune response;GO:0002683 negative regulation of immune system process;GO:0050776 regulation of immune response			Cytosol(Supported)				0.0	0.0	1.0	0.0	0.0	0.0	0.0	0.0	0.0	0.0	0.0	0.0	0.0	0.0	0.0	0.0	0.0	0.0	0.0	0.0
ENSG00000165185	158405	ensembl_gene_id	H. sapiens	158405	H. sapiens	KIAA1958	KIAA1958				Cytosol;Plasma membrane(Approved)				0.0	0.0	0.0	0.0	0.0	0.0	0.0	0.0	0.0	0.0	0.0	0.0	0.0	0.0	0.0	0.0	0.0	0.0	0.0	0.0
ENSG00000158270	81035	ensembl_gene_id	H. sapiens	81035	H. sapiens	COLEC12	collectin subfamily member 12	GO:0034138 toll-like receptor 3 signaling pathway;GO:0060355 positive regulation of cell adhesion molecule production;GO:0071360 cellular response to exogenous dsRNA			Cell Junctions;Golgi apparatus;Vesicles(Approved)		(M5880)NABA ECM AFFILIATED; (M5885)NABA MATRISOME ASSOCIATED; (M5889)NABA MATRISOME		0.0	0.0	0.0	0.0	0.0	0.0	0.0	0.0	0.0	0.0	0.0	0.0	0.0	0.0	1.0	0.0	0.0	0.0	0.0	0.0
ENSG00000184922	752	ensembl_gene_id	H. sapiens	752	H. sapiens	FMNL1	formin like 1	GO:0051014 actin filament severing;GO:0006929 substrate-dependent cell migration;GO:0030866 cortical actin cytoskeleton organization			Cytosol(Approved)				0.0	0.0	0.0	0.0	0.0	0.0	0.0	0.0	0.0	0.0	0.0	0.0	0.0	0.0	0.0	0.0	0.0	0.0	0.0	0.0
ENSG00000139174	144165	ensembl_gene_id	H. sapiens	144165	H. sapiens	PRICKLE1	prickle planar cell polarity protein 1	GO:2000691 negative regulation of cardiac muscle cell myoblast differentiation;GO:2000690 regulation of cardiac muscle cell myoblast differentiation;GO:0051892 negative regulation of cardioblast differentiation			Nucleoplasm(Approved)				0.0	1.0	0.0	0.0	0.0	1.0	0.0	0.0	0.0	0.0	0.0	0.0	0.0	0.0	0.0	0.0	0.0	1.0	0.0	0.0
ENSG00000134775	80206	ensembl_gene_id	H. sapiens	80206	H. sapiens	FHOD3	formin homology 2 domain containing 3	GO:0055003 cardiac myofibril assembly;GO:0030837 negative regulation of actin filament polymerization;GO:0045214 sarcomere organization							0.0	0.0	0.0	0.0	0.0	0.0	1.0	0.0	0.0	0.0	0.0	0.0	0.0	0.0	0.0	0.0	0.0	1.0	0.0	0.0
ENSG00000152056	130340	ensembl_gene_id	H. sapiens	130340	H. sapiens	AP1S3	adaptor related protein complex 1 subunit sigma 3	GO:0050690 regulation of defense response to virus by virus;GO:0019886 antigen processing and presentation of exogenous peptide antigen via MHC class II;GO:0002495 antigen processing and presentation of peptide antigen via MHC class II			Vesicles(Supported)				0.0	0.0	0.0	0.0	0.0	0.0	0.0	0.0	0.0	0.0	0.0	0.0	0.0	0.0	0.0	0.0	0.0	0.0	0.0	0.0
ENSG00000124731	54210	ensembl_gene_id	H. sapiens	54210	H. sapiens	TREM1	triggering receptor expressed on myeloid cells 1	GO:0002526 acute inflammatory response;GO:0050900 leukocyte migration;GO:0006959 humoral immune response		CD markers		D-tartaric acid (Scaffold protein binding)			0.0	0.0	0.0	0.0	0.0	0.0	0.0	0.0	0.0	0.0	0.0	0.0	0.0	0.0	0.0	0.0	0.0	0.0	0.0	0.0
ENSG00000091137	5172	ensembl_gene_id	H. sapiens	5172	H. sapiens	SLC26A4	solute carrier family 26 member 4	GO:0019532 oxalate transport;GO:0015705 iodide transport;GO:1902358 sulfate transmembrane transport		Transporters/Electrochemical Potential-driven transporters					0.0	0.0	0.0	0.0	0.0	0.0	0.0	0.0	0.0	0.0	0.0	0.0	0.0	0.0	0.0	0.0	0.0	0.0	0.0	0.0
ENSG00000130707	445	ensembl_gene_id	H. sapiens	445	H. sapiens	ASS1	argininosuccinate synthase 1	GO:0071400 cellular response to oleic acid;GO:0000053 argininosuccinate metabolic process;GO:0006526 arginine biosynthetic process		Enzymes/ENZYME proteins/Ligase	Cytosol;Nucleoplasm(Approved)	L-Arginine (Toxic substance binding);L-Aspartic Acid (Toxic substance binding);L-Aspartic Acid (Toxic substance binding);L-Citrulline (Toxic substance binding);L-Citrulline (Toxic substance binding);Adenosine triphosphate (Toxic substance binding)		(M5907)HALLMARK ESTROGEN RESPONSE LATE	0.0	1.0	1.0	0.0	0.0	0.0	0.0	0.0	0.0	0.0	0.0	0.0	0.0	0.0	0.0	0.0	0.0	1.0	0.0	0.0
ENSG00000198756	23127	ensembl_gene_id	H. sapiens	23127	H. sapiens	COLGALT2	collagen beta(1-O)galactosyltransferase 2			Enzymes/ENZYME proteins/Transferases	Nucleus;Vesicles(Approved)				0.0	0.0	0.0	0.0	0.0	0.0	0.0	1.0	0.0	0.0	0.0	0.0	0.0	0.0	0.0	0.0	0.0	0.0	0.0	0.0
ENSG00000182585	255324	ensembl_gene_id	H. sapiens	255324	H. sapiens	EPGN	epithelial mitogen	GO:0045741 positive regulation of epidermal growth factor-activated receptor activity;GO:0007176 regulation of epidermal growth factor-activated receptor activity;GO:0045742 positive regulation of epidermal growth factor receptor signaling pathway			Cytosol;Nuclear membrane;Nucleus(Approved)		(M5883)NABA SECRETED FACTORS; (M5885)NABA MATRISOME ASSOCIATED; (M5889)NABA MATRISOME		0.0	0.0	0.0	1.0	0.0	1.0	0.0	0.0	0.0	0.0	0.0	1.0	0.0	0.0	1.0	0.0	0.0	0.0	0.0	0.0
ENSG00000174791	9610	ensembl_gene_id	H. sapiens	9610	H. sapiens	RIN1	Ras and Rab interactor 1	GO:0031914 negative regulation of synaptic plasticity;GO:0008306 associative learning;GO:0048167 regulation of synaptic plasticity		RAS pathway related proteins	Nuclear membrane;Nucleus(Approved)		(M269)PID RAS PATHWAY; (M164)PID ERBB1 DOWNSTREAM PATHWAY		0.0	0.0	0.0	0.0	0.0	0.0	0.0	0.0	0.0	0.0	0.0	0.0	0.0	0.0	0.0	0.0	0.0	0.0	0.0	0.0
ENSG00000184860	93517	ensembl_gene_id	H. sapiens	93517	H. sapiens	SDR42E1	short chain dehydrogenase/reductase family 42E, member 1	GO:0006694 steroid biosynthetic process;GO:0008202 steroid metabolic process;GO:0008610 lipid biosynthetic process							0.0	0.0	0.0	0.0	0.0	0.0	0.0	0.0	0.0	0.0	0.0	0.0	0.0	0.0	0.0	0.0	0.0	0.0	0.0	0.0
ENSG00000166432	84460	ensembl_gene_id	H. sapiens	84460	H. sapiens	ZMAT1	zinc finger matrin-type 1				Nucleoplasm(Approved)				0.0	0.0	0.0	0.0	0.0	0.0	0.0	0.0	0.0	0.0	0.0	0.0	0.0	0.0	0.0	0.0	0.0	0.0	0.0	0.0
ENSG00000165449	220963	ensembl_gene_id	H. sapiens	220963	H. sapiens	SLC16A9	solute carrier family 16 member 9	GO:0046415 urate metabolic process;GO:0015718 monocarboxylic acid transport;GO:0046942 carboxylic acid transport		Transporters/Electrochemical Potential-driven transporters	Cell Junctions;Nucleus(Approved)				0.0	0.0	0.0	0.0	0.0	0.0	0.0	0.0	0.0	0.0	0.0	0.0	0.0	0.0	0.0	0.0	0.0	0.0	0.0	0.0
ENSG00000240764	56097	ensembl_gene_id	H. sapiens	56097	H. sapiens	PCDHGC5	protocadherin gamma subfamily C, 5	GO:0007156 homophilic cell adhesion via plasma membrane adhesion molecules;GO:0098742 cell-cell adhesion via plasma-membrane adhesion molecules;GO:0050808 synapse organization			Cytosol;Nucleoplasm;Nucleus;Plasma membrane;Vesicles(Approved)				0.0	0.0	0.0	0.0	0.0	0.0	0.0	0.0	0.0	0.0	0.0	0.0	0.0	0.0	0.0	0.0	0.0	0.0	0.0	0.0
ENSG00000138395	65061	ensembl_gene_id	H. sapiens	65061	H. sapiens	CDK15	cyclin dependent kinase 15	GO:0051726 regulation of cell cycle;GO:0006468 protein phosphorylation;GO:0016310 phosphorylation	CMGC Ser/Thr protein kinase family	Enzymes/{ENZYME proteins/Transferases,Kinases/CMGC Ser/Thr protein kinases}	Golgi apparatus;Nucleus(Approved)	Adenosine triphosphate (Protein serine/threonine kinase activity)			0.0	0.0	0.0	0.0	0.0	0.0	0.0	0.0	0.0	0.0	0.0	0.0	0.0	0.0	0.0	0.0	0.0	0.0	0.0	0.0
ENSG00000169744	9079	ensembl_gene_id	H. sapiens	9079	H. sapiens	LDB2	LIM domain binding 2	GO:0010669 epithelial structure maintenance;GO:0001942 hair follicle development;GO:0035019 somatic stem cell population maintenance			Nucleoli;Nucleus(Supported)Plasma membrane(Approved)				0.0	0.0	0.0	0.0	0.0	0.0	0.0	0.0	0.0	0.0	0.0	0.0	0.0	0.0	0.0	0.0	1.0	0.0	0.0	0.0
ENSG00000080493	8671	ensembl_gene_id	H. sapiens	8671	H. sapiens	SLC4A4	solute carrier family 4 member 4	GO:0045821 positive regulation of glycolytic process;GO:2001171 positive regulation of ATP biosynthetic process;GO:0006110 regulation of glycolytic process		Transporters/Electrochemical Potential-driven transporters				(M5932)HALLMARK INFLAMMATORY RESPONSE	0.0	0.0	0.0	0.0	0.0	0.0	0.0	0.0	0.0	0.0	0.0	0.0	0.0	0.0	0.0	0.0	0.0	0.0	0.0	0.0
ENSG00000138678	84803	ensembl_gene_id	H. sapiens	84803	H. sapiens	GPAT3	glycerol-3-phosphate acyltransferase 3	GO:0016024 CDP-diacylglycerol biosynthetic process;GO:0046341 CDP-diacylglycerol metabolic process;GO:0006654 phosphatidic acid biosynthetic process		Enzymes/ENZYME proteins/Transferases	Cytosol;Plasma membrane(Uncertain)				0.0	0.0	0.0	0.0	0.0	0.0	0.0	0.0	0.0	0.0	0.0	0.0	0.0	0.0	0.0	0.0	0.0	0.0	0.0	0.0
ENSG00000164929	79870	ensembl_gene_id	H. sapiens	79870	H. sapiens	BAALC	BAALC binder of MAP3K1 and KLF4				Cytosol(Supported)Nucleus(Approved)				0.0	0.0	0.0	0.0	0.0	0.0	0.0	0.0	0.0	0.0	0.0	0.0	0.0	0.0	0.0	0.0	0.0	0.0	0.0	0.0
ENSG00000139410	113675	ensembl_gene_id	H. sapiens	113675	H. sapiens	SDSL	serine dehydratase like	GO:0019518 L-threonine catabolic process to glycine;GO:0006565 L-serine catabolic process;GO:0006567 threonine catabolic process		Enzymes/ENZYME proteins/Lyases	Cytosol(Approved)	Pyridoxal Phosphate (Pyridoxal phosphate binding)			0.0	0.0	0.0	0.0	0.0	0.0	0.0	0.0	0.0	0.0	0.0	0.0	0.0	0.0	0.0	0.0	0.0	0.0	0.0	0.0
ENSG00000125845	650	ensembl_gene_id	H. sapiens	650	H. sapiens	BMP2	bone morphogenetic protein 2	GO:0003130 BMP signaling pathway involved in heart induction;GO:2000065 negative regulation of cortisol biosynthetic process;GO:0032348 negative regulation of aldosterone biosynthetic process			Vesicles(Enhanced)		(M181)PID BMP PATHWAY; (M5883)NABA SECRETED FACTORS; (M5885)NABA MATRISOME ASSOCIATED	(M5896)HALLMARK TGF BETA SIGNALING; (M5941)HALLMARK UV RESPONSE UP; (M5902)HALLMARK APOPTOSIS	1.0	1.0	1.0	1.0	1.0	0.0	1.0	1.0	1.0	0.0	1.0	1.0	1.0	0.0	1.0	1.0	1.0	1.0	1.0	0.0
ENSG00000177685	283229	ensembl_gene_id	H. sapiens	283229	H. sapiens	CRACR2B	calcium release activated channel regulator 2B	GO:2001256 regulation of store-operated calcium entry;GO:0002115 store-operated calcium entry;GO:0051924 regulation of calcium ion transport							0.0	0.0	0.0	0.0	0.0	0.0	0.0	0.0	0.0	0.0	0.0	0.0	0.0	0.0	0.0	0.0	0.0	0.0	0.0	0.0
ENSG00000081923	5205	ensembl_gene_id	H. sapiens	5205	H. sapiens	ATP8B1	ATPase phospholipid transporting 8B1	GO:0021650 vestibulocochlear nerve formation;GO:0021648 vestibulocochlear nerve morphogenesis;GO:0032534 regulation of microvillus assembly		Enzymes/ENZYME proteins/Hydrolases;Transporters/Primary Active Transporters				(M5916)HALLMARK APICAL SURFACE	0.0	0.0	0.0	0.0	0.0	0.0	1.0	0.0	0.0	0.0	0.0	0.0	0.0	0.0	0.0	0.0	0.0	0.0	0.0	0.0
ENSG00000188042	10123	ensembl_gene_id	H. sapiens	10123	H. sapiens	ARL4C	ADP ribosylation factor like GTPase 4C	GO:0032456 endocytic recycling;GO:0016197 endosomal transport;GO:0006886 intracellular protein transport			Cytosol;Plasma membrane(Supported)				0.0	0.0	0.0	0.0	0.0	0.0	0.0	0.0	0.0	0.0	0.0	0.0	0.0	0.0	0.0	0.0	0.0	0.0	0.0	0.0
ENSG00000204131	340527	ensembl_gene_id	H. sapiens	340527	H. sapiens	NHSL2	NHS like 2	GO:0030154 cell differentiation;GO:0048869 cellular developmental process;GO:0032502 developmental process							0.0	0.0	0.0	0.0	0.0	0.0	0.0	0.0	0.0	0.0	0.0	0.0	0.0	0.0	0.0	0.0	0.0	0.0	0.0	0.0
ENSG00000168621	2668	ensembl_gene_id	H. sapiens	2668	H. sapiens	GDNF	glial cell derived neurotrophic factor	GO:0072107 positive regulation of ureteric bud formation;GO:0072108 positive regulation of mesenchymal to epithelial transition involved in metanephros morphogenesis;GO:0072106 regulation of ureteric bud formation			Vesicles(Approved)Nucleoplasm(Uncertain)	AV411 (Receptor binding)	(M82)PID RET PATHWAY; (M142)PID AJDISS 2PATHWAY; (M5883)NABA SECRETED FACTORS	(M5956)HALLMARK KRAS SIGNALING DN	0.0	1.0	0.0	0.0	0.0	1.0	1.0	0.0	0.0	0.0	0.0	0.0	0.0	0.0	1.0	0.0	1.0	0.0	0.0	0.0
ENSG00000117155	117178	ensembl_gene_id	H. sapiens	117178	H. sapiens	SSX2IP	SSX family member 2 interacting protein	GO:0035735 intraciliary transport involved in cilium assembly;GO:0035020 regulation of Rac protein signal transduction;GO:0042073 intraciliary transport			Cell Junctions(Approved)				0.0	0.0	0.0	0.0	0.0	0.0	0.0	0.0	0.0	0.0	0.0	0.0	0.0	0.0	0.0	0.0	0.0	0.0	0.0	0.0
ENSG00000196391	342132	ensembl_gene_id	H. sapiens	342132	H. sapiens	ZNF774	zinc finger protein 774			Transcription factors/Zinc-coordinating DNA-binding domains	Intermediate filaments(Supported)Cytosol(Approved)				0.0	0.0	0.0	0.0	0.0	0.0	0.0	0.0	0.0	0.0	0.0	0.0	0.0	0.0	0.0	0.0	0.0	0.0	0.0	0.0
ENSG00000128567	5420	ensembl_gene_id	H. sapiens	5420	H. sapiens	PODXL	podocalyxin like	GO:0072015 glomerular visceral epithelial cell development;GO:0072310 glomerular epithelial cell development;GO:0072112 glomerular visceral epithelial cell differentiation			Plasma membrane(Supported)Microtubule organizing center;Vesicles(Approved)			(M5906)HALLMARK ESTROGEN RESPONSE EARLY	1.0	1.0	1.0	0.0	0.0	0.0	1.0	0.0	0.0	0.0	0.0	0.0	0.0	0.0	0.0	0.0	1.0	0.0	0.0	0.0
ENSG00000171310	50515	ensembl_gene_id	H. sapiens	50515	H. sapiens	CHST11	carbohydrate sulfotransferase 11	GO:0030206 chondroitin sulfate biosynthetic process;GO:0048703 embryonic viscerocranium morphogenesis;GO:0030512 negative regulation of transforming growth factor beta receptor signaling pathway		Enzymes/ENZYME proteins/Transferases	Golgi apparatus(Approved)				0.0	0.0	0.0	0.0	0.0	0.0	1.0	0.0	1.0	0.0	0.0	0.0	1.0	0.0	0.0	0.0	0.0	0.0	1.0	0.0
ENSG00000103599	64799	ensembl_gene_id	H. sapiens	64799	H. sapiens	IQCH	IQ motif containing H	GO:0008150 biological_process			Cytosol(Approved)				0.0	0.0	0.0	0.0	0.0	0.0	0.0	0.0	0.0	0.0	0.0	0.0	0.0	0.0	0.0	0.0	0.0	0.0	0.0	0.0
ENSG00000170439	196410	ensembl_gene_id	H. sapiens	196410	H. sapiens	METTL7B	methyltransferase like 7B	GO:0032259 methylation;GO:0008152 metabolic process;GO:0008150 biological_process			Microtubules;Vesicles(Supported)			(M5913)HALLMARK INTERFERON GAMMA RESPONSE	0.0	0.0	0.0	0.0	0.0	0.0	0.0	0.0	0.0	0.0	0.0	0.0	0.0	0.0	0.0	0.0	0.0	0.0	0.0	0.0
ENSG00000070808	815	ensembl_gene_id	H. sapiens	815	H. sapiens	CAMK2A	calcium/calmodulin dependent protein kinase II alpha	GO:1990443 peptidyl-threonine autophosphorylation;GO:0010666 positive regulation of cardiac muscle cell apoptotic process;GO:0038166 angiotensin-activated signaling pathway	CAMK Ser/Thr protein kinase family	Enzymes/{ENZYME proteins/Transferases,Kinases/CAMK Ser/Thr protein kinases}	Cell Junctions;Plasma membrane(Supported)Cytosol(Approved)	Hexatantalum Dodecabromide (Protein serine/threonine kinase activity);1,4-Dithiothreitol (Protein serine/threonine kinase activity);(2Z,3E)-2,3'-BIINDOLE-2',3(1H,1'H)-DIONE 3-{O-[(3R)-3,4-DIHYDROXYBUTYL]OXIME} (Protein serine/threonine kinase activity)	(M16518)ST WNT CA2 CYCLIC GMP PATHWAY; (M23)PID WNT NONCANONICAL PATHWAY; (M108)PID NETRIN PATHWAY		0.0	0.0	0.0	0.0	0.0	0.0	0.0	0.0	0.0	0.0	0.0	0.0	0.0	0.0	0.0	1.0	0.0	0.0	0.0	0.0
ENSG00000162692	7412	ensembl_gene_id	H. sapiens	7412	H. sapiens	VCAM1	vascular cell adhesion molecule 1	GO:0140039 cell-cell adhesion in response to extracellular stimulus;GO:0022614 membrane to membrane docking;GO:0050901 leukocyte tethering or rolling		CD markers	Cell Junctions(Approved)	Ethanol (Primary amine oxidase activity);Carvedilol (Primary amine oxidase activity);AGI-1067 (Primary amine oxidase activity)	(M212)PID INTEGRIN5 PATHWAY; (M267)PID ANTHRAX PATHWAY; (M118)PID INTEGRIN A9B1 PATHWAY	(M5913)HALLMARK INTERFERON GAMMA RESPONSE; (M5915)HALLMARK APICAL JUNCTION; (M5930)HALLMARK EPITHELIAL MESENCHYMAL TRANSITION	0.0	0.0	1.0	0.0	0.0	0.0	0.0	1.0	0.0	0.0	0.0	0.0	0.0	0.0	0.0	0.0	0.0	0.0	0.0	0.0
ENSG00000172020	2596	ensembl_gene_id	H. sapiens	2596	H. sapiens	GAP43	growth associated protein 43	GO:0016198 axon choice point recognition;GO:0099150 regulation of postsynaptic specialization assembly;GO:0150052 regulation of postsynapse assembly		Transporters/Transporter channels and pores	Plasma membrane(Enhanced)		(M266)PID NCADHERIN PATHWAY		0.0	0.0	0.0	0.0	0.0	0.0	1.0	0.0	0.0	1.0	0.0	0.0	0.0	0.0	0.0	0.0	0.0	0.0	0.0	0.0
ENSG00000168490	9796	ensembl_gene_id	H. sapiens	9796	H. sapiens	PHYHIP	phytanoyl-CoA 2-hydroxylase interacting protein	GO:0008104 protein localization;GO:0033036 macromolecule localization;GO:0051179 localization			Mitochondria(Enhanced)				0.0	0.0	0.0	0.0	0.0	0.0	0.0	0.0	0.0	0.0	0.0	0.0	0.0	0.0	0.0	0.0	0.0	0.0	0.0	0.0
ENSG00000179097	3355	ensembl_gene_id	H. sapiens	3355	H. sapiens	HTR1F	5-hydroxytryptamine receptor 1F	GO:0007198 adenylate cyclase-inhibiting serotonin receptor signaling pathway;GO:0098664 G protein-coupled serotonin receptor signaling pathway;GO:0007193 adenylate cyclase-inhibiting G protein-coupled receptor signaling pathway		G-protein coupled receptors/{GPCRs excl olfactory receptors,Serotonin receptors}		Eletriptan (Serotonin receptor activity);Methysergide (Serotonin receptor activity);Zolmitriptan (Serotonin receptor activity);Sumatriptan (Serotonin receptor activity);Ergotamine (Serotonin receptor activity);Naratriptan (Serotonin receptor activity);Rizatriptan (Serotonin receptor activity);Mianserin (Serotonin receptor activity)			0.0	0.0	0.0	0.0	0.0	0.0	0.0	0.0	0.0	0.0	0.0	0.0	0.0	0.0	0.0	0.0	0.0	0.0	0.0	0.0
ENSG00000198959	7052	ensembl_gene_id	H. sapiens	7052	H. sapiens	TGM2	transglutaminase 2	GO:0018153 isopeptide cross-linking via N6-(L-isoglutamyl)-L-lysine;GO:0032471 negative regulation of endoplasmic reticulum calcium ion concentration;GO:0051561 positive regulation of mitochondrial calcium ion concentration		Enzymes/ENZYME proteins/Transferases	Cytosol;Plasma membrane(Approved)	Guanosine-5'-Diphosphate (Protein-glutamine gamma-glutamyltransferase activity)	(M118)PID INTEGRIN A9B1 PATHWAY; (M99)PID TXA2PATHWAY; (M18)PID INTEGRIN1 PATHWAY	(M5947)HALLMARK IL2 STAT5 SIGNALING; (M5906)HALLMARK ESTROGEN RESPONSE EARLY; (M5891)HALLMARK HYPOXIA	0.0	1.0	1.0	0.0	0.0	0.0	0.0	0.0	0.0	0.0	0.0	0.0	0.0	0.0	1.0	1.0	0.0	0.0	0.0	0.0
ENSG00000143847	8497	ensembl_gene_id	H. sapiens	8497	H. sapiens	PPFIA4	PTPRF interacting protein alpha 4	GO:0014047 glutamate secretion;GO:0015800 acidic amino acid transport;GO:0006835 dicarboxylic acid transport						(M5937)HALLMARK GLYCOLYSIS; (M5909)HALLMARK MYOGENESIS; (M5891)HALLMARK HYPOXIA	0.0	0.0	0.0	0.0	0.0	0.0	0.0	0.0	0.0	0.0	0.0	0.0	0.0	0.0	0.0	0.0	0.0	0.0	0.0	0.0
ENSG00000163485	134	ensembl_gene_id	H. sapiens	134	H. sapiens	ADORA1	adenosine A1 receptor	GO:0042323 negative regulation of circadian sleep/wake cycle, non-REM sleep;GO:1900453 negative regulation of long-term synaptic depression;GO:0042321 negative regulation of circadian sleep/wake cycle, sleep		G-protein coupled receptors/{Adenosine and adenine nucleotide receptors,GPCRs excl olfactory receptors};Transporters	Plasma membrane(Supported)	Caffeine (Purine nucleoside binding);Theophylline (Purine nucleoside binding);Adenosine (Purine nucleoside binding);Dyphylline (Purine nucleoside binding);Pentoxifylline (Purine nucleoside binding);Enprofylline (Purine nucleoside binding);Gabapentin (Purine nucleoside binding);Aminophylline (Purine nucleoside binding);Oxtriphylline (Purine nucleoside binding);Theobromine (Purine nucleoside bindin…			0.0	0.0	1.0	1.0	0.0	0.0	1.0	0.0	0.0	1.0	1.0	1.0	0.0	0.0	0.0	1.0	0.0	0.0	0.0	0.0
ENSG00000091428	11069	ensembl_gene_id	H. sapiens	11069	H. sapiens	RAPGEF4	Rap guanine nucleotide exchange factor 4	GO:0050796 regulation of insulin secretion;GO:0030073 insulin secretion;GO:0090276 regulation of peptide hormone secretion			Focal adhesion sites(Approved)				0.0	0.0	0.0	0.0	0.0	0.0	0.0	0.0	0.0	0.0	0.0	0.0	0.0	0.0	0.0	0.0	0.0	0.0	0.0	0.0
ENSG00000166923	26585	ensembl_gene_id	H. sapiens	26585	H. sapiens	GREM1	gremlin 1, DAN family BMP antagonist	GO:0090190 positive regulation of branching involved in ureteric bud morphogenesis;GO:0060676 ureteric bud formation;GO:0090189 regulation of branching involved in ureteric bud morphogenesis					(M181)PID BMP PATHWAY; (M5880)NABA ECM AFFILIATED; (M5885)NABA MATRISOME ASSOCIATED	(M5930)HALLMARK EPITHELIAL MESENCHYMAL TRANSITION	0.0	1.0	1.0	1.0	1.0	1.0	1.0	1.0	1.0	1.0	1.0	1.0	1.0	1.0	1.0	0.0	1.0	1.0	1.0	0.0
ENSG00000221866	91584	ensembl_gene_id	H. sapiens	91584	H. sapiens	PLXNA4	plexin A4	GO:0021793 chemorepulsion of branchiomotor axon;GO:0021644 vagus nerve morphogenesis;GO:0021960 anterior commissure morphogenesis			Plasma membrane(Approved)		(M5880)NABA ECM AFFILIATED; (M5885)NABA MATRISOME ASSOCIATED; (M5889)NABA MATRISOME		0.0	0.0	1.0	0.0	0.0	0.0	1.0	0.0	0.0	0.0	0.0	0.0	0.0	0.0	1.0	0.0	0.0	0.0	0.0	0.0
ENSG00000099365	112755	ensembl_gene_id	H. sapiens	112755	H. sapiens	STX1B	syntaxin 1B	GO:1904050 positive regulation of spontaneous neurotransmitter secretion;GO:0098967 exocytic insertion of neurotransmitter receptor to postsynaptic membrane;GO:1905302 negative regulation of macropinocytosis							0.0	0.0	0.0	0.0	0.0	0.0	1.0	0.0	0.0	0.0	0.0	0.0	0.0	0.0	0.0	0.0	0.0	0.0	0.0	0.0
ENSG00000100739	623	ensembl_gene_id	H. sapiens	623	H. sapiens	BDKRB1	bradykinin receptor B1	GO:0051281 positive regulation of release of sequestered calcium ion into cytosol;GO:0051279 regulation of release of sequestered calcium ion into cytosol;GO:0010524 positive regulation of calcium ion transport into cytosol		G-protein coupled receptors/GPCRs excl olfactory receptors				(M5932)HALLMARK INFLAMMATORY RESPONSE	1.0	0.0	0.0	0.0	0.0	0.0	0.0	0.0	0.0	1.0	0.0	0.0	0.0	1.0	0.0	0.0	0.0	0.0	0.0	0.0
ENSG00000196155	25894	ensembl_gene_id	H. sapiens	25894	H. sapiens	PLEKHG4	pleckstrin homology and RhoGEF domain containing G4	GO:0090630 activation of GTPase activity;GO:0043547 positive regulation of GTPase activity;GO:0043087 regulation of GTPase activity			Cell Junctions(Approved)				0.0	0.0	0.0	0.0	0.0	0.0	0.0	0.0	0.0	0.0	0.0	0.0	0.0	0.0	0.0	0.0	0.0	0.0	0.0	0.0
ENSG00000171033	5569	ensembl_gene_id	H. sapiens	5569	H. sapiens	PKIA	cAMP-dependent protein kinase inhibitor alpha	GO:2000480 negative regulation of cAMP-dependent protein kinase activity;GO:0042308 negative regulation of protein import into nucleus;GO:1904590 negative regulation of protein import				3,5-Diiodotyrosine (Protein kinase a catalytic subunit binding);HYDROXYFASUDIL (Protein kinase a catalytic subunit binding);(1S)-2-(1H-INDOL-3-YL)-1-{[(5-ISOQUINOLIN-6-YLPYRIDIN-3-YL)OXY]METHYL}ETHYLAMINE (Protein kinase a catalytic subunit binding);(1S)-2-(1H-INDOL-3-YL)-1-[({5-[(E)-2-PYRIDIN-4-YLVINYL]PYRIDIN-3-YL}OXY)METHYL]ETHYLAMINE (Protein kinase a catalytic subunit binding);(1S)-1-(1H-IND…		(M5909)HALLMARK MYOGENESIS	0.0	0.0	0.0	1.0	0.0	0.0	0.0	0.0	0.0	0.0	0.0	0.0	0.0	1.0	0.0	0.0	0.0	0.0	0.0	0.0
ENSG00000126822	26030	ensembl_gene_id	H. sapiens	26030	H. sapiens	PLEKHG3	pleckstrin homology and RhoGEF domain containing G3				Cytosol;Nucleoplasm;Plasma membrane(Supported)Centrosome;Cytokinetic bridge(Approved)				0.0	0.0	0.0	0.0	0.0	0.0	0.0	0.0	0.0	0.0	0.0	0.0	0.0	0.0	0.0	0.0	0.0	0.0	0.0	0.0
ENSG00000130590	140700	ensembl_gene_id	H. sapiens	140700	H. sapiens	SAMD10	sterile alpha motif domain containing 10				Nucleoplasm(Approved)				0.0	0.0	0.0	0.0	0.0	0.0	0.0	0.0	0.0	0.0	0.0	0.0	0.0	0.0	0.0	0.0	0.0	0.0	0.0	0.0
ENSG00000147642	55638	ensembl_gene_id	H. sapiens	55638	H. sapiens	SYBU	syntabulin	GO:1990048 anterograde neuronal dense core vesicle transport;GO:0035774 positive regulation of insulin secretion involved in cellular response to glucose stimulus;GO:0099519 dense core granule cytoskeletal transport			Vesicles(Supported)			(M5906)HALLMARK ESTROGEN RESPONSE EARLY	0.0	0.0	0.0	0.0	0.0	0.0	0.0	0.0	0.0	0.0	0.0	0.0	0.0	0.0	0.0	0.0	0.0	0.0	0.0	0.0
ENSG00000128482	7732	ensembl_gene_id	H. sapiens	7732	H. sapiens	RNF112	ring finger protein 112	GO:0045687 positive regulation of glial cell differentiation;GO:0036474 cell death in response to hydrogen peroxide;GO:0071158 positive regulation of cell cycle arrest			Nuclear speckles(Approved)				0.0	0.0	0.0	0.0	0.0	0.0	1.0	0.0	0.0	0.0	0.0	0.0	0.0	0.0	0.0	0.0	0.0	0.0	0.0	0.0
ENSG00000110169	3263	ensembl_gene_id	H. sapiens	3263	H. sapiens	HPX	hemopexin	GO:0002925 positive regulation of humoral immune response mediated by circulating immunoglobulin;GO:0060335 positive regulation of interferon-gamma-mediated signaling pathway;GO:0002923 regulation of humoral immune response mediated by circulating immunoglobulin					(M5880)NABA ECM AFFILIATED; (M5885)NABA MATRISOME ASSOCIATED; (M5889)NABA MATRISOME		0.0	0.0	0.0	0.0	0.0	0.0	0.0	0.0	0.0	0.0	0.0	0.0	0.0	0.0	1.0	0.0	0.0	0.0	0.0	0.0
ENSG00000258947	10381	ensembl_gene_id	H. sapiens	10381	H. sapiens	TUBB3	tubulin beta 3 class III	GO:1990791 dorsal root ganglion development;GO:0038007 netrin-activated signaling pathway;GO:0061548 ganglion development				Epothilone D (Structural constituent of cytoskeleton);Epothilone B (Structural constituent of cytoskeleton);Ixabepilone (Structural constituent of cytoskeleton);CYT997 (Structural constituent of cytoskeleton);ZEN-012 (Structural constituent of cytoskeleton)			0.0	0.0	0.0	0.0	0.0	0.0	1.0	0.0	0.0	0.0	0.0	0.0	0.0	0.0	0.0	0.0	0.0	0.0	0.0	0.0
ENSG00000112182	60468	ensembl_gene_id	H. sapiens	60468	H. sapiens	BACH2	BTB domain and CNC homolog 2	GO:0090721 primary adaptive immune response involving T cells and B cells;GO:0090720 primary adaptive immune response;GO:0051170 import into nucleus		Transcription factors/Basic domains	Cytosol;Nucleus(Supported)				0.0	0.0	0.0	0.0	0.0	0.0	0.0	0.0	0.0	0.0	0.0	0.0	0.0	0.0	0.0	0.0	0.0	0.0	0.0	0.0
ENSG00000113578	2246	ensembl_gene_id	H. sapiens	2246	H. sapiens	FGF1	fibroblast growth factor 1	GO:0060681 branch elongation involved in ureteric bud branching;GO:0060677 ureteric bud elongation;GO:0001658 branching involved in ureteric bud morphogenesis		RAS pathway related proteins		Pentosan Polysulfate (S100 protein binding);Amlexanox (S100 protein binding);Sucrosofate (S100 protein binding);Formic Acid (S100 protein binding);O2-Sulfo-Glucuronic Acid (S100 protein binding);N,O6-Disulfo-Glucosamine (S100 protein binding);Naphthalene Trisulfonate (S100 protein binding);Pazopanib (S100 protein binding);5-AMINO-NAPHTALENE-2-MONOSULFONATE (S100 protein binding)	(M276)PID FGF PATHWAY; (M5883)NABA SECRETED FACTORS; (M5885)NABA MATRISOME ASSOCIATED		1.0	1.0	0.0	1.0	0.0	1.0	1.0	0.0	1.0	1.0	0.0	1.0	0.0	0.0	1.0	0.0	0.0	0.0	0.0	0.0
ENSG00000085741	7481	ensembl_gene_id	H. sapiens	7481	H. sapiens	WNT11	Wnt family member 11	GO:0090082 positive regulation of heart induction by negative regulation of canonical Wnt signaling pathway;GO:0090081 regulation of heart induction by regulation of canonical Wnt signaling pathway;GO:0100012 regulation of heart induction by canonical Wnt signaling pathway			Centrosome;Cytosol(Approved)		(M5493)WNT SIGNALING; (M5883)NABA SECRETED FACTORS; (M5885)NABA MATRISOME ASSOCIATED		1.0	1.0	0.0	1.0	1.0	1.0	1.0	0.0	0.0	0.0	1.0	0.0	1.0	0.0	1.0	1.0	1.0	0.0	1.0	0.0
ENSG00000167972	21	ensembl_gene_id	H. sapiens	21	H. sapiens	ABCA3	ATP binding cassette subfamily A member 3	GO:0051384 response to glucocorticoid;GO:0031960 response to corticosteroid;GO:0048545 response to steroid hormone		Transporters/Primary Active Transporters	Cytosol;Nucleoplasm(Approved)		(M200)PID ERA GENOMIC PATHWAY	(M5948)HALLMARK BILE ACID METABOLISM; (M5906)HALLMARK ESTROGEN RESPONSE EARLY; (M5907)HALLMARK ESTROGEN RESPONSE LATE	0.0	0.0	0.0	0.0	0.0	0.0	0.0	0.0	0.0	0.0	0.0	0.0	0.0	0.0	0.0	0.0	0.0	0.0	0.0	0.0
ENSG00000153233	5801	ensembl_gene_id	H. sapiens	5801	H. sapiens	PTPRR	protein tyrosine phosphatase receptor type R	GO:1903385 regulation of homophilic cell adhesion;GO:0038128 ERBB2 signaling pathway;GO:0070373 negative regulation of ERK1 and ERK2 cascade		Enzymes/ENZYME proteins/Hydrolases	Cell Junctions;Cytosol;Plasma membrane(Supported)			(M5953)HALLMARK KRAS SIGNALING UP	0.0	0.0	1.0	1.0	0.0	1.0	0.0	0.0	0.0	0.0	0.0	1.0	0.0	1.0	0.0	0.0	0.0	0.0	0.0	0.0
ENSG00000171617	8507	ensembl_gene_id	H. sapiens	8507	H. sapiens	ENC1	ectodermal-neural cortex 1	GO:0010499 proteasomal ubiquitin-independent protein catabolic process;GO:0010976 positive regulation of neuron projection development;GO:0017148 negative regulation of translation			Plasma membrane(Uncertain)				0.0	0.0	0.0	0.0	0.0	0.0	1.0	0.0	0.0	0.0	0.0	0.0	0.0	0.0	0.0	0.0	0.0	0.0	0.0	0.0
ENSG00000137203	7020	ensembl_gene_id	H. sapiens	7020	H. sapiens	TFAP2A	transcription factor AP-2 alpha	GO:0003409 optic cup structural organization;GO:0021623 oculomotor nerve formation;GO:0021622 oculomotor nerve morphogenesis		Transcription factors/Basic domains	Nucleoplasm(Enhanced)		(M220)PID CASPASE PATHWAY		0.0	1.0	0.0	0.0	1.0	0.0	0.0	0.0	0.0	0.0	1.0	0.0	1.0	0.0	0.0	1.0	0.0	0.0	0.0	0.0
ENSG00000152217	26040	ensembl_gene_id	H. sapiens	26040	H. sapiens	SETBP1	SET binding protein 1	GO:0006357 regulation of transcription by RNA polymerase II;GO:0006366 transcription by RNA polymerase II;GO:0006355 regulation of transcription, DNA-templated			Nuclear bodies;Nucleus(Supported)Cytosol(Uncertain)				0.0	0.0	0.0	0.0	0.0	0.0	0.0	0.0	0.0	0.0	0.0	0.0	0.0	0.0	0.0	0.0	0.0	0.0	0.0	0.0
ENSG00000219607	648791	ensembl_gene_id	H. sapiens	648791	H. sapiens	PPP1R3G	protein phosphatase 1 regulatory subunit 3G	GO:0045725 positive regulation of glycogen biosynthetic process;GO:0070875 positive regulation of glycogen metabolic process;GO:2000467 positive regulation of glycogen (starch) synthase activity							0.0	0.0	0.0	1.0	0.0	0.0	0.0	0.0	0.0	0.0	0.0	0.0	0.0	0.0	0.0	0.0	0.0	0.0	0.0	0.0
ENSG00000137501	54843	ensembl_gene_id	H. sapiens	54843	H. sapiens	SYTL2	synaptotagmin like 2	GO:0070257 positive regulation of mucus secretion;GO:0070255 regulation of mucus secretion;GO:0070254 mucus secretion		Transporters	Plasma membrane(Supported)Golgi apparatus(Approved)Nucleus(Uncertain)			(M5924)HALLMARK MTORC1 SIGNALING	0.0	0.0	0.0	0.0	0.0	0.0	0.0	0.0	0.0	1.0	0.0	0.0	0.0	1.0	0.0	0.0	0.0	0.0	0.0	0.0
ENSG00000157064	23057	ensembl_gene_id	H. sapiens	23057	H. sapiens	NMNAT2	nicotinamide nucleotide adenylyltransferase 2	GO:0009435 NAD biosynthetic process;GO:0019674 NAD metabolic process;GO:0019359 nicotinamide nucleotide biosynthetic process		Enzymes/ENZYME proteins/Transferases					0.0	0.0	0.0	0.0	0.0	0.0	0.0	0.0	0.0	0.0	0.0	0.0	0.0	0.0	0.0	0.0	0.0	0.0	0.0	0.0
ENSG00000182010	219790	ensembl_gene_id	H. sapiens	219790	H. sapiens	RTKN2	rhotekin 2	GO:2001243 negative regulation of intrinsic apoptotic signaling pathway;GO:1901224 positive regulation of NIK/NF-kappaB signaling;GO:0051092 positive regulation of NF-kappaB transcription factor activity			Mitochondria;Nucleoplasm(Approved)				0.0	0.0	0.0	0.0	0.0	0.0	0.0	0.0	0.0	0.0	0.0	0.0	0.0	1.0	0.0	0.0	0.0	0.0	0.0	0.0
ENSG00000189143	1364	ensembl_gene_id	H. sapiens	1364	H. sapiens	CLDN4	claudin 4	GO:0061436 establishment of skin barrier;GO:1905050 positive regulation of metallopeptidase activity;GO:0016338 calcium-independent cell-cell adhesion via plasma membrane cell-adhesion molecules		Transporters/Transporter channels and pores	Plasma membrane(Supported)			(M5915)HALLMARK APICAL JUNCTION	1.0	0.0	0.0	0.0	0.0	0.0	0.0	0.0	0.0	1.0	0.0	0.0	0.0	0.0	0.0	0.0	1.0	0.0	0.0	0.0
ENSG00000198774	9182	ensembl_gene_id	H. sapiens	9182	H. sapiens	RASSF9	Ras association domain family member 9	GO:0006605 protein targeting;GO:0016197 endosomal transport;GO:0006886 intracellular protein transport							0.0	0.0	0.0	0.0	0.0	0.0	0.0	0.0	0.0	0.0	0.0	0.0	0.0	0.0	0.0	0.0	0.0	0.0	0.0	0.0
ENSG00000163814	64866	ensembl_gene_id	H. sapiens	64866	H. sapiens	CDCP1	CUB domain containing protein 1			CD markers				(M5947)HALLMARK IL2 STAT5 SIGNALING	0.0	0.0	0.0	0.0	0.0	0.0	0.0	0.0	0.0	0.0	0.0	0.0	0.0	0.0	0.0	0.0	0.0	0.0	0.0	0.0
ENSG00000041353	5874	ensembl_gene_id	H. sapiens	5874	H. sapiens	RAB27B	RAB27B, member RAS oncogene family	GO:0099641 anterograde axonal protein transport;GO:0032402 melanosome transport;GO:0099640 axo-dendritic protein transport			Cytosol;Golgi apparatus;Plasma membrane(Uncertain)				0.0	0.0	0.0	0.0	0.0	0.0	0.0	0.0	0.0	0.0	0.0	0.0	0.0	0.0	0.0	0.0	0.0	0.0	0.0	0.0
ENSG00000171631	5031	ensembl_gene_id	H. sapiens	5031	H. sapiens	P2RY6	pyrimidinergic receptor P2Y6	GO:0031587 positive regulation of inositol 1,4,5-trisphosphate-sensitive calcium-release channel activity;GO:0031585 regulation of inositol 1,4,5-trisphosphate-sensitive calcium-release channel activity;GO:0051281 positive regulation of release of sequestered calcium ion into cytosol		G-protein coupled receptors/{Adenosine and adenine nucleotide receptors,GPCRs excl olfactory receptors}					1.0	0.0	0.0	1.0	0.0	0.0	0.0	0.0	0.0	0.0	0.0	0.0	0.0	0.0	0.0	0.0	0.0	0.0	0.0	0.0
ENSG00000165899	283310	ensembl_gene_id	H. sapiens	283310	H. sapiens	OTOGL	otogelin like	GO:0046373 L-arabinose metabolic process;GO:0019566 arabinose metabolic process;GO:0019321 pentose metabolic process			Cytosol(Approved)				0.0	0.0	0.0	0.0	0.0	0.0	0.0	0.0	0.0	0.0	0.0	0.0	0.0	0.0	0.0	0.0	0.0	0.0	0.0	0.0
ENSG00000168398	624	ensembl_gene_id	H. sapiens	624	H. sapiens	BDKRB2	bradykinin receptor B2	GO:1902239 negative regulation of intrinsic apoptotic signaling pathway in response to osmotic stress by p53 class mediator;GO:1902238 regulation of intrinsic apoptotic signaling pathway in response to osmotic stress by p53 class mediator;GO:1990127 intrinsic apoptotic signaling pathway in response to osmotic stress by p53 class mediator		G-protein coupled receptors/GPCRs excl olfactory receptors		Anatibant (Type 1 angiotensin receptor binding);Icatibant (Type 1 angiotensin receptor binding)	(M236)PID DELTA NP63 PATHWAY; (M145)PID P53 DOWNSTREAM PATHWAY	(M5909)HALLMARK MYOGENESIS	0.0	0.0	0.0	0.0	0.0	0.0	1.0	0.0	0.0	1.0	0.0	1.0	0.0	1.0	0.0	0.0	0.0	0.0	0.0	0.0
ENSG00000170537	79905	ensembl_gene_id	H. sapiens	79905	H. sapiens	TMC7	transmembrane channel like 7	GO:0034220 ion transmembrane transport;GO:0006811 ion transport;GO:0055085 transmembrane transport			Vesicles(Approved)				0.0	0.0	0.0	0.0	0.0	0.0	0.0	0.0	0.0	0.0	0.0	0.0	0.0	0.0	0.0	0.0	0.0	0.0	0.0	0.0
ENSG00000139318	1848	ensembl_gene_id	H. sapiens	1848	H. sapiens	DUSP6	dual specificity phosphatase 6	GO:0000188 inactivation of MAPK activity;GO:0043407 negative regulation of MAP kinase activity;GO:0000187 activation of MAPK activity		Enzymes/ENZYME proteins/Hydrolases	Cytosol(Supported)Nucleoplasm(Uncertain)		(M4910)ST ERK1 ERK2 MAPK PATHWAY; (M164)PID ERBB1 DOWNSTREAM PATHWAY	(M5946)HALLMARK COAGULATION; (M5921)HALLMARK COMPLEMENT; (M5953)HALLMARK KRAS SIGNALING UP	0.0	0.0	0.0	1.0	0.0	0.0	1.0	0.0	1.0	0.0	0.0	1.0	0.0	1.0	0.0	1.0	0.0	1.0	0.0	0.0
ENSG00000138311	22891	ensembl_gene_id	H. sapiens	22891	H. sapiens	ZNF365	zinc finger protein 365	GO:0021687 cerebellar molecular layer morphogenesis;GO:0110026 regulation of DNA strand resection involved in replication fork processing;GO:0021679 cerebellar molecular layer development			Microtubule organizing center(Supported)Vesicles(Approved)			(M5939)HALLMARK P53 PATHWAY	0.0	0.0	0.0	0.0	0.0	0.0	1.0	0.0	0.0	0.0	0.0	0.0	0.0	0.0	0.0	0.0	0.0	0.0	0.0	0.0
ENSG00000081277	5317	ensembl_gene_id	H. sapiens	5317	H. sapiens	PKP1	plakophilin 1	GO:0045110 intermediate filament bundle assembly;GO:0070268 cornification;GO:1902373 negative regulation of mRNA catabolic process			Nucleoplasm(Enhanced)			(M5956)HALLMARK KRAS SIGNALING DN; (M5891)HALLMARK HYPOXIA	0.0	0.0	0.0	0.0	0.0	0.0	0.0	0.0	0.0	0.0	0.0	0.0	0.0	0.0	0.0	0.0	1.0	0.0	0.0	0.0
ENSG00000259370	105370854	ensembl_gene_id	H. sapiens	105370854	H. sapiens	LOC105370854	uncharacterized LOC105370854								0.0	0.0	0.0	0.0	0.0	0.0	0.0	0.0	0.0	0.0	0.0	0.0	0.0	0.0	0.0	0.0	0.0	0.0	0.0	0.0
ENSG00000154451	115362	ensembl_gene_id	H. sapiens	115362	H. sapiens	GBP5	guanylate binding protein 5	GO:0072616 interleukin-18 secretion;GO:1900227 positive regulation of NLRP3 inflammasome complex assembly;GO:1900017 positive regulation of cytokine production involved in inflammatory response			Endoplasmic reticulum(Approved)				0.0	0.0	0.0	0.0	0.0	0.0	0.0	0.0	0.0	0.0	0.0	0.0	0.0	0.0	0.0	0.0	0.0	0.0	0.0	0.0
ENSG00000103742	57722	ensembl_gene_id	H. sapiens	57722	H. sapiens	IGDCC4	immunoglobulin superfamily DCC subclass member 4				Cytosol;Nucleoplasm(Approved)				0.0	0.0	0.0	0.0	0.0	0.0	0.0	0.0	0.0	0.0	0.0	0.0	0.0	0.0	0.0	0.0	0.0	0.0	0.0	0.0
ENSG00000163235	7039	ensembl_gene_id	H. sapiens	7039	H. sapiens	TGFA	transforming growth factor alpha	GO:0045741 positive regulation of epidermal growth factor-activated receptor activity;GO:0048208 COPII vesicle coating;GO:0007176 regulation of epidermal growth factor-activated receptor activity			Vesicles(Approved)		(M201)PID ERBB NETWORK PATHWAY; (M176)PID FOXM1 PATHWAY; (M145)PID P53 DOWNSTREAM PATHWAY	(M5937)HALLMARK GLYCOLYSIS; (M5939)HALLMARK P53 PATHWAY	0.0	0.0	0.0	1.0	0.0	0.0	0.0	0.0	0.0	0.0	0.0	1.0	0.0	0.0	1.0	0.0	0.0	0.0	0.0	0.0
ENSG00000167178	57611	ensembl_gene_id	H. sapiens	57611	H. sapiens	ISLR2	immunoglobulin superfamily containing leucine rich repeat 2	GO:0045773 positive regulation of axon extension;GO:0050772 positive regulation of axonogenesis;GO:0030516 regulation of axon extension							0.0	0.0	0.0	0.0	0.0	0.0	1.0	0.0	0.0	0.0	0.0	0.0	0.0	0.0	0.0	0.0	0.0	0.0	0.0	0.0
ENSG00000139289	22822	ensembl_gene_id	H. sapiens	22822	H. sapiens	PHLDA1	pleckstrin homology like domain family A member 1	GO:0045210 FasL biosynthetic process;GO:0000086 G2/M transition of mitotic cell cycle;GO:0044839 cell cycle G2/M phase transition			Nucleoli(Supported)			(M5947)HALLMARK IL2 STAT5 SIGNALING; (M5890)HALLMARK TNFA SIGNALING VIA NFKB	0.0	0.0	0.0	0.0	0.0	0.0	0.0	0.0	0.0	0.0	0.0	0.0	0.0	0.0	0.0	1.0	0.0	0.0	0.0	0.0
ENSG00000135437	5959	ensembl_gene_id	H. sapiens	5959	H. sapiens	RDH5	retinol dehydrogenase 5	GO:0042572 retinol metabolic process;GO:0001523 retinoid metabolic process;GO:0016101 diterpenoid metabolic process		Enzymes/ENZYME proteins/Oxidoreductases	Vesicles(Approved)	NADH (Retinol dehydrogenase activity);Vitamin A (Retinol dehydrogenase activity)	(M117)PID CONE PATHWAY; (M204)PID RHODOPSIN PATHWAY		0.0	0.0	0.0	0.0	0.0	0.0	0.0	0.0	0.0	0.0	0.0	0.0	0.0	0.0	0.0	0.0	0.0	0.0	0.0	0.0
ENSG00000049246	8863	ensembl_gene_id	H. sapiens	8863	H. sapiens	PER3	period circadian regulator 3	GO:0045187 regulation of circadian sleep/wake cycle, sleep;GO:0050802 circadian sleep/wake cycle, sleep;GO:0043153 entrainment of circadian clock by photoperiod			Cytosol(Uncertain)				0.0	0.0	0.0	0.0	0.0	0.0	0.0	0.0	0.0	0.0	0.0	0.0	0.0	0.0	0.0	0.0	0.0	0.0	0.0	0.0
ENSG00000214376	387804	ensembl_gene_id	H. sapiens	387804	H. sapiens	VSTM5	V-set and transmembrane domain containing 5	GO:1904891 positive regulation of excitatory synapse assembly;GO:1904889 regulation of excitatory synapse assembly;GO:1904861 excitatory synapse assembly			Endoplasmic reticulum(Uncertain)				0.0	0.0	0.0	0.0	0.0	0.0	1.0	0.0	0.0	0.0	0.0	0.0	0.0	0.0	0.0	0.0	0.0	0.0	0.0	0.0
ENSG00000137331	8870	ensembl_gene_id	H. sapiens	8870	H. sapiens	IER3	immediate early response 3	GO:0014066 regulation of phosphatidylinositol 3-kinase signaling;GO:0014065 phosphatidylinositol 3-kinase signaling;GO:0048015 phosphatidylinositol-mediated signaling						(M5902)HALLMARK APOPTOSIS; (M5891)HALLMARK HYPOXIA; (M5937)HALLMARK GLYCOLYSIS	0.0	0.0	0.0	0.0	0.0	0.0	0.0	0.0	0.0	0.0	0.0	0.0	0.0	0.0	0.0	0.0	0.0	0.0	0.0	0.0
ENSG00000272398	100133941	ensembl_gene_id	H. sapiens	100133941	H. sapiens	CD24	CD24 molecule	GO:2000768 positive regulation of nephron tubule epithelial cell differentiation;GO:0072139 glomerular parietal epithelial cell differentiation;GO:0032597 B cell receptor transport into membrane raft			Vesicles(Supported)				0.0	1.0	1.0	1.0	0.0	0.0	0.0	0.0	0.0	0.0	0.0	0.0	0.0	0.0	0.0	0.0	1.0	0.0	0.0	0.0
ENSG00000133169	55859	ensembl_gene_id	H. sapiens	55859	H. sapiens	BEX1	brain expressed X-linked 1	GO:0051091 positive regulation of DNA-binding transcription factor activity;GO:0051090 regulation of DNA-binding transcription factor activity;GO:0045944 positive regulation of transcription by RNA polymerase II					(M153)PID P75 NTR PATHWAY		0.0	0.0	0.0	0.0	0.0	0.0	0.0	0.0	0.0	0.0	0.0	0.0	0.0	0.0	0.0	0.0	0.0	0.0	0.0	0.0
ENSG00000143816	7483	ensembl_gene_id	H. sapiens	7483	H. sapiens	WNT9A	Wnt family member 9A	GO:0061072 iris morphogenesis;GO:0061303 cornea development in camera-type eye;GO:0032331 negative regulation of chondrocyte differentiation					(M5493)WNT SIGNALING; (M5883)NABA SECRETED FACTORS; (M5885)NABA MATRISOME ASSOCIATED		0.0	0.0	0.0	0.0	0.0	0.0	0.0	0.0	0.0	0.0	1.0	0.0	1.0	0.0	1.0	0.0	0.0	0.0	1.0	0.0
ENSG00000189120	80320	ensembl_gene_id	H. sapiens	80320	H. sapiens	SP6	Sp6 transcription factor	GO:0042481 regulation of odontogenesis;GO:0042476 odontogenesis;GO:2000027 regulation of animal organ morphogenesis		Transcription factors/Zinc-coordinating DNA-binding domains	Nucleoplasm(Supported)Centrosome;Mitotic spindle(Approved)				0.0	1.0	0.0	0.0	0.0	0.0	0.0	0.0	0.0	0.0	0.0	0.0	0.0	0.0	0.0	0.0	0.0	0.0	0.0	0.0
ENSG00000249992	25907	ensembl_gene_id	H. sapiens	25907	H. sapiens	TMEM158	transmembrane protein 158 (gene/pseudogene)							(M5953)HALLMARK KRAS SIGNALING UP	0.0	0.0	0.0	0.0	0.0	0.0	0.0	0.0	0.0	0.0	0.0	0.0	0.0	0.0	0.0	0.0	0.0	0.0	0.0	0.0
ENSG00000099937	3053	ensembl_gene_id	H. sapiens	3053	H. sapiens	SERPIND1	serpin family D member 1	GO:0010951 negative regulation of endopeptidase activity;GO:0010466 negative regulation of peptidase activity;GO:0007596 blood coagulation			Vesicles(Approved)	Ardeparin (Serine-type endopeptidase inhibitor activity);Sulodexide (Serine-type endopeptidase inhibitor activity)	(M3468)NABA ECM REGULATORS; (M5885)NABA MATRISOME ASSOCIATED; (M5889)NABA MATRISOME		0.0	0.0	0.0	0.0	0.0	0.0	1.0	0.0	0.0	1.0	0.0	0.0	0.0	0.0	1.0	0.0	0.0	0.0	0.0	0.0
ENSG00000111674	2026	ensembl_gene_id	H. sapiens	2026	H. sapiens	ENO2	enolase 2	GO:0061621 canonical glycolysis;GO:0061620 glycolytic process through glucose-6-phosphate;GO:0061615 glycolytic process through fructose-6-phosphate		Enzymes/ENZYME proteins/Lyases	Cytosol;Plasma membrane(Supported)	2-Phosphoglycolic Acid (Phosphopyruvate hydratase activity)		(M5935)HALLMARK FATTY ACID METABOLISM; (M5941)HALLMARK UV RESPONSE UP; (M5902)HALLMARK APOPTOSIS	0.0	0.0	0.0	0.0	0.0	0.0	0.0	0.0	0.0	0.0	0.0	0.0	0.0	0.0	0.0	0.0	0.0	0.0	0.0	0.0
ENSG00000197106	388662	ensembl_gene_id	H. sapiens	388662	H. sapiens	SLC6A17	solute carrier family 6 member 17	GO:0015820 leucine transport;GO:0032328 alanine transport;GO:0015824 proline transport		Transporters/Electrochemical Potential-driven transporters	Golgi apparatus;Nucleus(Approved)				0.0	0.0	0.0	0.0	0.0	0.0	0.0	0.0	0.0	0.0	0.0	0.0	0.0	0.0	0.0	0.0	0.0	0.0	0.0	0.0
ENSG00000162755	126823	ensembl_gene_id	H. sapiens	126823	H. sapiens	KLHDC9	kelch domain containing 9	GO:0008150 biological_process			Nucleoplasm(Uncertain)				0.0	0.0	0.0	0.0	0.0	0.0	0.0	0.0	0.0	0.0	0.0	0.0	0.0	0.0	0.0	0.0	0.0	0.0	0.0	0.0
ENSG00000130513	9518	ensembl_gene_id	H. sapiens	9518	H. sapiens	GDF15	growth differentiation factor 15	GO:0060400 negative regulation of growth hormone receptor signaling pathway;GO:0060398 regulation of growth hormone receptor signaling pathway;GO:1901741 positive regulation of myoblast fusion			Golgi apparatus(Enhanced)		(M256)PID TAP63 PATHWAY; (M19)PID P73PATHWAY; (M145)PID P53 DOWNSTREAM PATHWAY		0.0	0.0	0.0	1.0	0.0	0.0	1.0	0.0	1.0	0.0	0.0	1.0	0.0	0.0	1.0	0.0	0.0	1.0	0.0	0.0
ENSG00000095752	3589	ensembl_gene_id	H. sapiens	3589	H. sapiens	IL11	interleukin 11	GO:2000352 negative regulation of endothelial cell apoptotic process;GO:1903659 regulation of complement-dependent cytotoxicity;GO:1904036 negative regulation of epithelial cell apoptotic process			Mitochondria(Uncertain)		(M5883)NABA SECRETED FACTORS; (M5885)NABA MATRISOME ASSOCIATED; (M5889)NABA MATRISOME	(M5950)HALLMARK ALLOGRAFT REJECTION	0.0	0.0	1.0	1.0	0.0	0.0	0.0	0.0	0.0	0.0	0.0	0.0	0.0	0.0	1.0	0.0	0.0	0.0	0.0	0.0
ENSG00000132326	8864	ensembl_gene_id	H. sapiens	8864	H. sapiens	PER2	period circadian regulator 2	GO:0051946 regulation of glutamate uptake involved in transmission of nerve impulse;GO:0051935 glutamate reuptake;GO:0002036 regulation of L-glutamate import across plasma membrane					(M95)PID CIRCADIAN PATHWAY		0.0	0.0	0.0	0.0	0.0	0.0	1.0	0.0	0.0	0.0	1.0	0.0	0.0	1.0	0.0	0.0	0.0	0.0	0.0	0.0
ENSG00000121440	23024	ensembl_gene_id	H. sapiens	23024	H. sapiens	PDZRN3	PDZ domain containing ring finger 3	GO:0007528 neuromuscular junction development;GO:0016567 protein ubiquitination;GO:0050808 synapse organization		Enzymes/ENZYME proteins/Transferases	Cytosol;Nucleus(Supported)				0.0	0.0	0.0	0.0	0.0	0.0	0.0	0.0	0.0	0.0	0.0	0.0	0.0	0.0	0.0	0.0	0.0	0.0	0.0	0.0
ENSG00000163053	151473	ensembl_gene_id	H. sapiens	151473	H. sapiens	SLC16A14	solute carrier family 16 member 14	GO:0015718 monocarboxylic acid transport;GO:0046942 carboxylic acid transport;GO:0015849 organic acid transport		Transporters/Electrochemical Potential-driven transporters	Endoplasmic reticulum(Approved)				0.0	0.0	0.0	0.0	0.0	0.0	0.0	0.0	0.0	0.0	0.0	0.0	0.0	0.0	0.0	0.0	0.0	0.0	0.0	0.0
ENSG00000107611	8029	ensembl_gene_id	H. sapiens	8029	H. sapiens	CUBN	cubilin	GO:0015889 cobalamin transport;GO:0034384 high-density lipoprotein particle clearance;GO:0042359 vitamin D metabolic process				Hydroxocobalamin (Transporter activity)			0.0	0.0	0.0	0.0	0.0	0.0	0.0	0.0	0.0	0.0	0.0	0.0	0.0	0.0	0.0	0.0	0.0	0.0	0.0	0.0
ENSG00000140538	4916	ensembl_gene_id	H. sapiens	4916	H. sapiens	NTRK3	neurotrophic receptor tyrosine kinase 3	GO:0019056 modulation by virus of host transcription;GO:0048691 positive regulation of axon extension involved in regeneration;GO:0039656 modulation by virus of host gene expression	Tyr protein kinase family	Enzymes/{ENZYME proteins/Transferases,Kinases/Tyr protein kinases}	Nucleoli(Supported)Nuclear membrane(Approved)		(M100)PID SHP2 PATHWAY; (M187)PID TRKR PATHWAY	(M5941)HALLMARK UV RESPONSE UP	1.0	0.0	0.0	1.0	0.0	0.0	1.0	0.0	1.0	1.0	0.0	1.0	0.0	1.0	0.0	1.0	1.0	0.0	0.0	0.0
ENSG00000064300	4804	ensembl_gene_id	H. sapiens	4804	H. sapiens	NGFR	nerve growth factor receptor	GO:1903588 negative regulation of blood vessel endothelial cell proliferation involved in sprouting angiogenesis;GO:0051799 negative regulation of hair follicle development;GO:0042488 positive regulation of odontogenesis of dentin-containing tooth		CD markers;RAS pathway related proteins	Nucleoplasm;Plasma membrane(Approved)		(M18895)SA TRKA RECEPTOR; (M187)PID TRKR PATHWAY; (M153)PID P75 NTR PATHWAY		0.0	1.0	0.0	0.0	0.0	1.0	1.0	0.0	1.0	0.0	1.0	1.0	0.0	0.0	0.0	1.0	1.0	0.0	0.0	0.0
ENSG00000137033	90865	ensembl_gene_id	H. sapiens	90865	H. sapiens	IL33	interleukin 33	GO:0051025 negative regulation of immunoglobulin secretion;GO:0002282 microglial cell activation involved in immune response;GO:0090197 positive regulation of chemokine secretion						(M5953)HALLMARK KRAS SIGNALING UP	0.0	0.0	1.0	0.0	0.0	0.0	0.0	0.0	0.0	0.0	0.0	0.0	0.0	0.0	0.0	0.0	0.0	0.0	0.0	0.0
ENSG00000154736	11096	ensembl_gene_id	H. sapiens	11096	H. sapiens	ADAMTS5	ADAM metallopeptidase with thrombospondin type 1 motif 5	GO:0044691 tooth eruption;GO:0120163 negative regulation of cold-induced thermogenesis;GO:0022617 extracellular matrix disassembly			Nucleoplasm(Supported)	Batimastat (Zinc ion binding);(2R)-N~4~-hydroxy-2-(3-hydroxybenzyl)-N~1~-[(1S,2R)-2-hydroxy-2,3-dihydro-1H-inden-1-yl]butanediamide (Zinc ion binding);N-hydroxy-4-({4-[4-(trifluoromethyl)phenoxy]phenyl}sulfonyl)tetrahydro-2H-pyran-4-carboxamide (Zinc ion binding)	(M3468)NABA ECM REGULATORS; (M5885)NABA MATRISOME ASSOCIATED; (M5889)NABA MATRISOME	(M5915)HALLMARK APICAL JUNCTION	0.0	0.0	0.0	0.0	0.0	0.0	0.0	1.0	0.0	0.0	0.0	0.0	0.0	0.0	1.0	0.0	0.0	0.0	0.0	0.0
ENSG00000013588	9052	ensembl_gene_id	H. sapiens	9052	H. sapiens	GPRC5A	G protein-coupled receptor class C group 5 member A	GO:0007175 negative regulation of epidermal growth factor-activated receptor activity;GO:0007176 regulation of epidermal growth factor-activated receptor activity;GO:0061099 negative regulation of protein tyrosine kinase activity		G-protein coupled receptors/GPCRs excl olfactory receptors	Plasma membrane;Vesicles(Enhanced)	Tretinoin (G-protein coupled receptor activity)			0.0	0.0	0.0	1.0	0.0	0.0	0.0	0.0	0.0	0.0	0.0	1.0	0.0	1.0	0.0	0.0	0.0	0.0	0.0	0.0
ENSG00000084734	2646	ensembl_gene_id	H. sapiens	2646	H. sapiens	GCKR	glucokinase regulator	GO:0033132 negative regulation of glucokinase activity;GO:0006110 regulation of glycolytic process;GO:1903300 negative regulation of hexokinase activity			Intermediate filaments(Approved)			(M5934)HALLMARK XENOBIOTIC METABOLISM	0.0	0.0	0.0	0.0	0.0	0.0	0.0	0.0	0.0	0.0	0.0	0.0	0.0	1.0	0.0	0.0	0.0	0.0	0.0	0.0
ENSG00000186847	3861	ensembl_gene_id	H. sapiens	3861	H. sapiens	KRT14	keratin 14	GO:0045110 intermediate filament bundle assembly;GO:0031581 hemidesmosome assembly;GO:0070268 cornification			Intermediate filaments(Enhanced)		(M236)PID DELTA NP63 PATHWAY; (M115)PID REG GR PATHWAY		0.0	0.0	0.0	0.0	0.0	0.0	0.0	0.0	0.0	0.0	0.0	0.0	0.0	0.0	0.0	0.0	1.0	0.0	0.0	0.0
ENSG00000113070	1839	ensembl_gene_id	H. sapiens	1839	H. sapiens	HBEGF	heparin binding EGF like growth factor	GO:0051545 negative regulation of elastin biosynthetic process;GO:0051543 regulation of elastin biosynthetic process;GO:0035313 wound healing, spreading of epidermal cells					(M201)PID ERBB NETWORK PATHWAY; (M13)PID ERBB4 PATHWAY; (M41)PID ER NONGENOMIC PATHWAY	(M5932)HALLMARK INFLAMMATORY RESPONSE; (M5953)HALLMARK KRAS SIGNALING UP; (M5939)HALLMARK P53 PATHWAY	1.0	1.0	0.0	0.0	0.0	1.0	1.0	0.0	0.0	1.0	0.0	1.0	0.0	0.0	1.0	0.0	0.0	1.0	0.0	0.0
ENSG00000197872	81553	ensembl_gene_id	H. sapiens	81553	H. sapiens	CYRIA	CYFIP related Rac1 interactor A				Nucleoplasm(Approved)				0.0	0.0	0.0	0.0	0.0	0.0	0.0	0.0	0.0	0.0	0.0	0.0	0.0	0.0	0.0	0.0	0.0	0.0	0.0	0.0
ENSG00000105516	1628	ensembl_gene_id	H. sapiens	1628	H. sapiens	DBP	D-box binding PAR bZIP transcription factor	GO:0001889 liver development;GO:0061008 hepaticobiliary system development;GO:0007623 circadian rhythm		Transcription factors/Basic domains				(M5942)HALLMARK UV RESPONSE DN	0.0	0.0	0.0	0.0	0.0	0.0	0.0	0.0	0.0	0.0	0.0	0.0	0.0	0.0	0.0	0.0	0.0	0.0	0.0	0.0
ENSG00000205426	3887	ensembl_gene_id	H. sapiens	3887	H. sapiens	KRT81	keratin 81	GO:0070268 cornification;GO:0031424 keratinization;GO:0030216 keratinocyte differentiation							0.0	0.0	0.0	0.0	0.0	0.0	0.0	0.0	0.0	0.0	0.0	0.0	0.0	0.0	0.0	0.0	1.0	0.0	0.0	0.0
ENSG00000087494	5744	ensembl_gene_id	H. sapiens	5744	H. sapiens	PTHLH	parathyroid hormone like hormone	GO:0061182 negative regulation of chondrocyte development;GO:0061181 regulation of chondrocyte development;GO:0032331 negative regulation of chondrocyte differentiation			Cytosol;Nucleoplasm(Supported)Golgi apparatus(Approved)		(M211)PID HEDGEHOG 2PATHWAY	(M5930)HALLMARK EPITHELIAL MESENCHYMAL TRANSITION	0.0	0.0	0.0	0.0	1.0	0.0	0.0	0.0	0.0	0.0	1.0	0.0	1.0	0.0	0.0	0.0	1.0	0.0	1.0	0.0
ENSG00000103647	10391	ensembl_gene_id	H. sapiens	10391	H. sapiens	CORO2B	coronin 2B	GO:0003093 regulation of glomerular filtration;GO:0051497 negative regulation of stress fiber assembly;GO:0001977 renal system process involved in regulation of blood volume			Focal adhesion sites;Plasma membrane(Approved)				0.0	0.0	1.0	0.0	0.0	0.0	0.0	0.0	0.0	1.0	0.0	0.0	0.0	0.0	0.0	0.0	0.0	0.0	0.0	0.0
ENSG00000128510	51200	ensembl_gene_id	H. sapiens	51200	H. sapiens	CPA4	carboxypeptidase A4	GO:0016573 histone acetylation;GO:0018393 internal peptidyl-lysine acetylation;GO:0006475 internal protein amino acid acetylation		Enzymes/Peptidases/Metallopeptidases	Centrosome;Cytosol;Nucleoplasm(Approved)				0.0	0.0	0.0	0.0	0.0	0.0	0.0	0.0	0.0	0.0	0.0	0.0	0.0	0.0	0.0	0.0	0.0	0.0	0.0	0.0
ENSG00000221852	83895	ensembl_gene_id	H. sapiens	83895	H. sapiens	KRTAP1-5	keratin associated protein 1-5	GO:0031424 keratinization;GO:0030216 keratinocyte differentiation;GO:0009913 epidermal cell differentiation							0.0	0.0	0.0	0.0	0.0	0.0	0.0	0.0	0.0	0.0	0.0	0.0	0.0	0.0	0.0	0.0	1.0	0.0	0.0	0.0
ENSG00000111863	84830	ensembl_gene_id	H. sapiens	84830	H. sapiens	ADTRP	androgen dependent TFPI regulating protein	GO:0003332 negative regulation of extracellular matrix constituent secretion;GO:0042758 long-chain fatty acid catabolic process;GO:2000402 negative regulation of lymphocyte migration			Nucleoli(Uncertain)				0.0	0.0	1.0	0.0	0.0	1.0	0.0	1.0	0.0	1.0	0.0	0.0	0.0	0.0	0.0	0.0	0.0	0.0	0.0	0.0
ENSG00000139304	374462	ensembl_gene_id	H. sapiens	374462	H. sapiens	PTPRQ	protein tyrosine phosphatase receptor type Q	GO:0035335 peptidyl-tyrosine dephosphorylation;GO:0045598 regulation of fat cell differentiation;GO:0045444 fat cell differentiation			Cytosol(Approved)				0.0	0.0	0.0	0.0	0.0	0.0	0.0	0.0	0.0	0.0	0.0	0.0	0.0	0.0	0.0	0.0	0.0	0.0	0.0	0.0
ENSG00000119699	7043	ensembl_gene_id	H. sapiens	7043	H. sapiens	TGFB3	transforming growth factor beta 3	GO:1905075 positive regulation of tight junction disassembly;GO:0042704 uterine wall breakdown;GO:0060364 frontal suture morphogenesis			Vesicles(Approved)	1,4-Diethylene Dioxide (Type iii transforming growth factor beta receptor binding)	(M185)PID ALK1 PATHWAY; (M33)PID GLYPICAN 1PATHWAY; (M286)PID TGFBR PATHWAY	(M5891)HALLMARK HYPOXIA	0.0	1.0	1.0	1.0	1.0	0.0	1.0	1.0	1.0	1.0	1.0	0.0	1.0	0.0	1.0	1.0	0.0	0.0	0.0	0.0
ENSG00000170442	3892	ensembl_gene_id	H. sapiens	3892	H. sapiens	KRT86	keratin 86	GO:0070268 cornification;GO:0031424 keratinization;GO:0030216 keratinocyte differentiation			Cytosol(Approved)				0.0	0.0	0.0	0.0	0.0	0.0	0.0	0.0	0.0	0.0	0.0	0.0	0.0	0.0	0.0	0.0	1.0	0.0	0.0	0.0
ENSG00000184545	1850	ensembl_gene_id	H. sapiens	1850	H. sapiens	DUSP8	dual specificity phosphatase 8	GO:0000188 inactivation of MAPK activity;GO:0043407 negative regulation of MAP kinase activity;GO:0071901 negative regulation of protein serine/threonine kinase activity		Enzymes/ENZYME proteins/Hydrolases	Cytosol(Approved)		(M76)PID P38 ALPHA BETA PATHWAY; (M3721)ST JNK MAPK PATHWAY; (M166)PID ATF2 PATHWAY		0.0	0.0	0.0	1.0	0.0	0.0	0.0	0.0	0.0	0.0	0.0	0.0	0.0	1.0	0.0	0.0	0.0	0.0	0.0	0.0
ENSG00000240891	257068	ensembl_gene_id	H. sapiens	257068	H. sapiens	PLCXD2	phosphatidylinositol specific phospholipase C X domain containing 2	GO:0016042 lipid catabolic process;GO:0006629 lipid metabolic process;GO:1901575 organic substance catabolic process			Nucleoplasm(Approved)				0.0	0.0	0.0	0.0	0.0	0.0	0.0	0.0	0.0	0.0	0.0	0.0	0.0	0.0	0.0	0.0	0.0	0.0	0.0	0.0
ENSG00000144063	7851	ensembl_gene_id	H. sapiens	7851	H. sapiens	MALL	mal, T cell differentiation protein like	GO:0042632 cholesterol homeostasis;GO:0055092 sterol homeostasis;GO:0042552 myelination						(M5953)HALLMARK KRAS SIGNALING UP	0.0	0.0	0.0	0.0	0.0	0.0	0.0	0.0	0.0	0.0	0.0	0.0	0.0	0.0	0.0	0.0	0.0	0.0	0.0	0.0
ENSG00000122861	5328	ensembl_gene_id	H. sapiens	5328	H. sapiens	PLAU	plasminogen activator, urokinase	GO:2000097 regulation of smooth muscle cell-matrix adhesion;GO:0042730 fibrinolysis;GO:0061302 smooth muscle cell-matrix adhesion		Enzymes/{ENZYME proteins/Hydrolases,Peptidases/Serine-type peptidases}		Urokinase (Serine-type endopeptidase activity);Amiloride (Serine-type endopeptidase activity);2-(2-Hydroxy-5-Methoxy-Phenyl)-1h-Benzoimidazole-5-Carboxamidine (Serine-type endopeptidase activity);6-(N-Phenylcarbamyl)-2-Naphthalenecarboxamidine (Serine-type endopeptidase activity);2-(2-Hydroxy-Phenyl)-1h-Benzoimidazole-5-Carboxamidine (Serine-type endopeptidase activity);6-[N-(4-(Aminomethyl)Pheny…	(M212)PID INTEGRIN5 PATHWAY; (M169)PID INTEGRIN2 PATHWAY; (M63)PID AVB3 OPN PATHWAY	(M5946)HALLMARK COAGULATION; (M5953)HALLMARK KRAS SIGNALING UP; (M5890)HALLMARK TNFA SIGNALING VIA NFKB	1.0	0.0	1.0	0.0	0.0	0.0	1.0	0.0	0.0	1.0	0.0	0.0	0.0	0.0	1.0	0.0	0.0	0.0	0.0	0.0
ENSG00000171877	84978	ensembl_gene_id	H. sapiens	84978	H. sapiens	FRMD5	FERM domain containing 5	GO:2000146 negative regulation of cell motility;GO:0031032 actomyosin structure organization;GO:0045785 positive regulation of cell adhesion			Centrosome;Golgi apparatus(Uncertain)				0.0	0.0	1.0	0.0	0.0	0.0	0.0	0.0	0.0	0.0	0.0	0.0	0.0	0.0	0.0	0.0	0.0	0.0	0.0	0.0
ENSG00000170961	3037	ensembl_gene_id	H. sapiens	3037	H. sapiens	HAS2	hyaluronan synthase 2	GO:1900625 positive regulation of monocyte aggregation;GO:1900127 positive regulation of hyaluronan biosynthetic process;GO:1900623 regulation of monocyte aggregation		Enzymes/ENZYME proteins/Transferases	Nuclear speckles(Approved)			(M5942)HALLMARK UV RESPONSE DN; (M5932)HALLMARK INFLAMMATORY RESPONSE	1.0	1.0	1.0	0.0	0.0	1.0	1.0	1.0	1.0	1.0	0.0	0.0	1.0	0.0	0.0	0.0	0.0	0.0	0.0	0.0
ENSG00000163823	1230	ensembl_gene_id	H. sapiens	1230	H. sapiens	CCR1	C-C motif chemokine receptor 1	GO:0090026 positive regulation of monocyte chemotaxis;GO:0045672 positive regulation of osteoclast differentiation;GO:0071677 positive regulation of mononuclear cell migration		CD markers;G-protein coupled receptors/{Chemokines and chemotactic factors receptors,GPCRs excl olfactory receptors}				(M5897)HALLMARK IL6 JAK STAT3 SIGNALING; (M5950)HALLMARK ALLOGRAFT REJECTION	1.0	0.0	1.0	1.0	1.0	0.0	1.0	0.0	0.0	1.0	0.0	0.0	0.0	0.0	0.0	0.0	0.0	0.0	0.0	0.0
ENSG00000115221	3694	ensembl_gene_id	H. sapiens	3694	H. sapiens	ITGB6	integrin subunit beta 6	GO:0038044 transforming growth factor-beta secretion;GO:1901388 regulation of transforming growth factor beta activation;GO:0046718 viral entry into host cell			Cell Junctions(Supported)Centrosome;Nucleoplasm(Uncertain)		(M212)PID INTEGRIN5 PATHWAY; (M47)PID INTEGRIN CS PATHWAY		0.0	0.0	0.0	0.0	0.0	0.0	0.0	1.0	0.0	0.0	0.0	0.0	0.0	0.0	0.0	0.0	0.0	0.0	0.0	0.0
ENSG00000162409	5563	ensembl_gene_id	H. sapiens	5563	H. sapiens	PRKAA2	protein kinase AMP-activated catalytic subunit alpha 2	GO:0045821 positive regulation of glycolytic process;GO:0006853 carnitine shuttle;GO:1904428 negative regulation of tubulin deacetylation	CAMK Ser/Thr protein kinase family	Enzymes/{ENZYME proteins/Transferases,Kinases/CAMK Ser/Thr protein kinases}	Nuclear speckles(Supported)Golgi apparatus(Approved)		(M87)PID LKB1 PATHWAY; (M237)PID VEGFR1 2 PATHWAY	(M5923)HALLMARK PI3K AKT MTOR SIGNALING	0.0	0.0	0.0	0.0	0.0	0.0	0.0	0.0	0.0	0.0	0.0	0.0	0.0	1.0	0.0	0.0	0.0	0.0	0.0	0.0
ENSG00000134259	4803	ensembl_gene_id	H. sapiens	4803	H. sapiens	NGF	nerve growth factor	GO:0048672 positive regulation of collateral sprouting;GO:0032455 nerve growth factor processing;GO:0048670 regulation of collateral sprouting		RAS pathway related proteins		Clenbuterol (Receptor signaling protein activity);RI 624 (Receptor signaling protein activity)	(M18895)SA TRKA RECEPTOR; (M271)PID PI3K PLC TRK PATHWAY; (M100)PID SHP2 PATHWAY	(M5923)HALLMARK PI3K AKT MTOR SIGNALING; (M5953)HALLMARK KRAS SIGNALING UP	0.0	0.0	0.0	1.0	0.0	0.0	1.0	0.0	1.0	0.0	1.0	1.0	0.0	0.0	1.0	1.0	0.0	0.0	0.0	0.0
ENSG00000179813	144809	ensembl_gene_id	H. sapiens	144809	H. sapiens	FAM216B	family with sequence similarity 216 member B								0.0	0.0	0.0	0.0	0.0	0.0	0.0	0.0	0.0	0.0	0.0	0.0	0.0	0.0	0.0	0.0	0.0	0.0	0.0	0.0
ENSG00000164283	11082	ensembl_gene_id	H. sapiens	11082	H. sapiens	ESM1	endothelial cell specific molecule 1	GO:1902204 positive regulation of hepatocyte growth factor receptor signaling pathway;GO:1902202 regulation of hepatocyte growth factor receptor signaling pathway;GO:0048012 hepatocyte growth factor receptor signaling pathway					(M5882)NABA PROTEOGLYCANS; (M5884)NABA CORE MATRISOME; (M5889)NABA MATRISOME		0.0	0.0	0.0	0.0	0.0	1.0	0.0	1.0	0.0	0.0	0.0	1.0	0.0	0.0	0.0	0.0	0.0	0.0	0.0	0.0
ENSG00000143320	1382	ensembl_gene_id	H. sapiens	1382	H. sapiens	CRABP2	cellular retinoic acid binding protein 2	GO:0048672 positive regulation of collateral sprouting;GO:0048670 regulation of collateral sprouting;GO:0042573 retinoic acid metabolic process			Cytosol;Nucleoplasm(Supported)			(M5949)HALLMARK PEROXISOME	0.0	0.0	0.0	0.0	0.0	0.0	1.0	0.0	0.0	0.0	0.0	0.0	0.0	0.0	0.0	0.0	1.0	0.0	0.0	0.0
ENSG00000174792	152816	ensembl_gene_id	H. sapiens	152816	H. sapiens	ODAPH	odontogenesis associated phosphoprotein	GO:0070175 positive regulation of enamel mineralization;GO:0070173 regulation of enamel mineralization;GO:0070172 positive regulation of tooth mineralization							0.0	1.0	0.0	0.0	1.0	0.0	0.0	0.0	0.0	0.0	0.0	0.0	0.0	0.0	0.0	0.0	0.0	0.0	0.0	0.0
ENSG00000171346	3866	ensembl_gene_id	H. sapiens	3866	H. sapiens	KRT15	keratin 15	GO:0070268 cornification;GO:0031424 keratinization;GO:0030216 keratinocyte differentiation			Intermediate filaments(Supported)Nucleoplasm(Uncertain)			(M5956)HALLMARK KRAS SIGNALING DN; (M5906)HALLMARK ESTROGEN RESPONSE EARLY	0.0	0.0	0.0	0.0	0.0	0.0	0.0	0.0	0.0	0.0	0.0	0.0	0.0	0.0	0.0	0.0	1.0	0.0	0.0	0.0
ENSG00000186832	3868	ensembl_gene_id	H. sapiens	3868	H. sapiens	KRT16	keratin 16	GO:0061436 establishment of skin barrier;GO:0070268 cornification;GO:0051546 keratinocyte migration			Intermediate filaments(Approved)				0.0	1.0	0.0	0.0	0.0	1.0	0.0	0.0	0.0	1.0	0.0	0.0	0.0	0.0	0.0	0.0	1.0	0.0	0.0	0.0
ENSG00000131737	3885	ensembl_gene_id	H. sapiens	3885	H. sapiens	KRT34	keratin 34	GO:0070268 cornification;GO:0031424 keratinization;GO:0030216 keratinocyte differentiation			Nucleus;Vesicles(Approved)				0.0	0.0	0.0	0.0	0.0	0.0	0.0	0.0	0.0	0.0	0.0	0.0	0.0	0.0	0.0	0.0	1.0	0.0	0.0	0.0
ENSG00000157554	2078	ensembl_gene_id	H. sapiens	2078	H. sapiens	ERG	ETS transcription factor ERG	GO:0045944 positive regulation of transcription by RNA polymerase II;GO:0045893 positive regulation of transcription, DNA-templated;GO:1903508 positive regulation of nucleic acid-templated transcription		Transcription factors/Helix-turn-helix domains	Cytosol;Nucleoplasm(Approved)				0.0	0.0	0.0	0.0	0.0	0.0	0.0	0.0	0.0	0.0	0.0	0.0	0.0	0.0	0.0	0.0	0.0	0.0	0.0	0.0
ENSG00000146006	26045	ensembl_gene_id	H. sapiens	26045	H. sapiens	LRRTM2	leucine rich repeat transmembrane neuronal 2	GO:0099151 regulation of postsynaptic density assembly;GO:0002091 negative regulation of receptor internalization;GO:0099150 regulation of postsynaptic specialization assembly							0.0	0.0	0.0	0.0	0.0	0.0	1.0	0.0	0.0	0.0	0.0	0.0	0.0	0.0	0.0	0.0	0.0	0.0	0.0	0.0
ENSG00000149599	128853	ensembl_gene_id	H. sapiens	128853	H. sapiens	DUSP15	dual specificity phosphatase 15	GO:0046330 positive regulation of JNK cascade;GO:0032874 positive regulation of stress-activated MAPK cascade;GO:0046328 regulation of JNK cascade		Enzymes/ENZYME proteins/Hydrolases	Cytosol;Plasma membrane(Approved)				0.0	0.0	0.0	1.0	0.0	0.0	0.0	0.0	1.0	0.0	0.0	0.0	0.0	0.0	0.0	0.0	0.0	0.0	0.0	0.0
ENSG00000138316	140766	ensembl_gene_id	H. sapiens	140766	H. sapiens	ADAMTS14	ADAM metallopeptidase with thrombospondin type 1 motif 14	GO:0030199 collagen fibril organization;GO:0030574 collagen catabolic process;GO:0032963 collagen metabolic process			Cytosol(Uncertain)		(M3468)NABA ECM REGULATORS; (M5885)NABA MATRISOME ASSOCIATED; (M5889)NABA MATRISOME		0.0	0.0	0.0	0.0	0.0	0.0	0.0	1.0	0.0	0.0	0.0	0.0	0.0	0.0	1.0	0.0	0.0	0.0	0.0	0.0
ENSG00000180044	401097	ensembl_gene_id	H. sapiens	401097	H. sapiens	C3orf80	chromosome 3 open reading frame 80								0.0	0.0	0.0	0.0	0.0	0.0	0.0	0.0	0.0	0.0	0.0	0.0	0.0	0.0	0.0	0.0	0.0	0.0	0.0	0.0
ENSG00000146592	9586	ensembl_gene_id	H. sapiens	9586	H. sapiens	CREB5	cAMP responsive element binding protein 5	GO:0045893 positive regulation of transcription, DNA-templated;GO:1903508 positive regulation of nucleic acid-templated transcription;GO:1902680 positive regulation of RNA biosynthetic process		Transcription factors/Basic domains	Nucleus;Plasma membrane;Vesicles(Approved)		(M14775)ST G ALPHA S PATHWAY; (M7871)ST GRANULE CELL SURVIVAL PATHWAY; (M4910)ST ERK1 ERK2 MAPK PATHWAY		0.0	0.0	0.0	0.0	0.0	0.0	0.0	0.0	0.0	0.0	0.0	0.0	0.0	0.0	0.0	0.0	0.0	0.0	0.0	0.0
ENSG00000099889	421	ensembl_gene_id	H. sapiens	421	H. sapiens	ARVCF	ARVCF delta catenin family member	GO:0016339 calcium-dependent cell-cell adhesion via plasma membrane cell adhesion molecules;GO:0007043 cell-cell junction assembly;GO:0045216 cell-cell junction organization			Cell Junctions(Enhanced)Plasma membrane(Supported)				0.0	0.0	0.0	0.0	0.0	0.0	0.0	0.0	0.0	0.0	0.0	0.0	0.0	0.0	0.0	0.0	0.0	0.0	0.0	0.0
ENSG00000145536	170690	ensembl_gene_id	H. sapiens	170690	H. sapiens	ADAMTS16	ADAM metallopeptidase with thrombospondin type 1 motif 16	GO:0001658 branching involved in ureteric bud morphogenesis;GO:0060675 ureteric bud morphogenesis;GO:0072171 mesonephric tubule morphogenesis					(M3468)NABA ECM REGULATORS; (M5885)NABA MATRISOME ASSOCIATED; (M5889)NABA MATRISOME		0.0	1.0	0.0	0.0	0.0	0.0	1.0	1.0	0.0	0.0	0.0	0.0	0.0	0.0	1.0	0.0	0.0	0.0	0.0	0.0
ENSG00000099260	54873	ensembl_gene_id	H. sapiens	54873	H. sapiens	PALMD	palmdelphin	GO:0008360 regulation of cell shape;GO:0022604 regulation of cell morphogenesis;GO:0000902 cell morphogenesis			Actin filaments(Supported)Focal adhesion sites;Plasma membrane(Approved)				0.0	0.0	0.0	0.0	0.0	0.0	0.0	0.0	0.0	0.0	0.0	0.0	0.0	0.0	0.0	0.0	0.0	0.0	0.0	0.0
ENSG00000136244	3569	ensembl_gene_id	H. sapiens	3569	H. sapiens	IL6	interleukin 6	GO:0072540 T-helper 17 cell lineage commitment;GO:0002295 T-helper cell lineage commitment;GO:2000553 positive regulation of T-helper 2 cell cytokine production			Vesicles(Approved)	Ginseng (Interleukin-6 receptor binding);YSIL6 (Interleukin-6 receptor binding);AV411 (Interleukin-6 receptor binding);681323 (Interleukin-6 receptor binding);VX-702 (Interleukin-6 receptor binding);CRx-139 (Interleukin-6 receptor binding);HMPL-004 (Interleukin-6 receptor binding);Siltuximab (Interleukin-6 receptor binding)	(M9174)ST STAT3 PATHWAY; (M36)PID IL27 PATHWAY; (M65)PID FRA PATHWAY	(M5897)HALLMARK IL6 JAK STAT3 SIGNALING; (M5941)HALLMARK UV RESPONSE UP; (M5902)HALLMARK APOPTOSIS	1.0	0.0	1.0	1.0	1.0	1.0	1.0	1.0	0.0	1.0	1.0	0.0	0.0	0.0	1.0	1.0	0.0	0.0	0.0	0.0
ENSG00000183508	54855	ensembl_gene_id	H. sapiens	54855	H. sapiens	TENT5C	terminal nucleotidyltransferase 5C	GO:0048255 mRNA stabilization;GO:1902373 negative regulation of mRNA catabolic process;GO:0043489 RNA stabilization			Nucleoplasm(Approved)			(M5956)HALLMARK KRAS SIGNALING DN; (M5945)HALLMARK HEME METABOLISM	0.0	0.0	0.0	0.0	0.0	0.0	0.0	0.0	0.0	0.0	0.0	0.0	0.0	0.0	0.0	0.0	0.0	0.0	0.0	0.0
ENSG00000178726	7056	ensembl_gene_id	H. sapiens	7056	H. sapiens	THBD	thrombomodulin	GO:0051918 negative regulation of fibrinolysis;GO:0051917 regulation of fibrinolysis;GO:0010544 negative regulation of platelet activation		CD markers	Cytosol;Nucleoplasm(Approved)	Drotrecogin alfa (Transmembrane signaling receptor activity);Ibuprofen (Transmembrane signaling receptor activity)	(M65)PID FRA PATHWAY	(M5944)HALLMARK ANGIOGENESIS; (M5946)HALLMARK COAGULATION	0.0	0.0	1.0	0.0	0.0	0.0	0.0	0.0	0.0	1.0	0.0	0.0	0.0	0.0	0.0	0.0	0.0	0.0	0.0	0.0
ENSG00000204866	147920	ensembl_gene_id	H. sapiens	147920	H. sapiens	IGFL2	IGF like family member 2	GO:0008150 biological_process			Nucleoplasm;Plasma membrane(Approved)				0.0	0.0	0.0	0.0	0.0	0.0	0.0	0.0	0.0	0.0	0.0	0.0	0.0	0.0	0.0	0.0	0.0	0.0	0.0	0.0
ENSG00000177494	79413	ensembl_gene_id	H. sapiens	79413	H. sapiens	ZBED2	zinc finger BED-type containing 2	GO:0090263 positive regulation of canonical Wnt signaling pathway;GO:0030177 positive regulation of Wnt signaling pathway;GO:0060828 regulation of canonical Wnt signaling pathway		Transcription factors/Zinc-coordinating DNA-binding domains	Cytosol;Mitochondria;Nuclear bodies(Approved)				0.0	0.0	0.0	0.0	0.0	0.0	0.0	0.0	0.0	0.0	0.0	0.0	0.0	0.0	0.0	0.0	0.0	0.0	0.0	0.0
ENSG00000019186	1591	ensembl_gene_id	H. sapiens	1591	H. sapiens	CYP24A1	cytochrome P450 family 24 subfamily A member 1	GO:0070561 vitamin D receptor signaling pathway;GO:0042369 vitamin D catabolic process;GO:0071305 cellular response to vitamin D		Enzymes/ENZYME proteins/Oxidoreductases	Mitochondria(Enhanced)Nucleoplasm(Approved)Plasma membrane(Uncertain)	CTA018 (Oxidoreductase activity)			0.0	0.0	0.0	0.0	1.0	0.0	0.0	0.0	0.0	0.0	0.0	0.0	0.0	0.0	0.0	0.0	0.0	0.0	0.0	0.0
ENSG00000171303	3777	ensembl_gene_id	H. sapiens	3777	H. sapiens	KCNK3	potassium two pore domain channel subfamily K member 3	GO:0051481 negative regulation of cytosolic calcium ion concentration;GO:0071294 cellular response to zinc ion;GO:0090102 cochlea development		Transporters/Transporter channels and pores;Voltage-gated ion channels/Two-P Potassium Channels		Doxapram (S100 protein binding);Halothane (S100 protein binding)			0.0	0.0	0.0	0.0	0.0	0.0	0.0	0.0	0.0	0.0	0.0	0.0	0.0	0.0	0.0	0.0	0.0	0.0	0.0	0.0
ENSG00000212724	730755	ensembl_gene_id	H. sapiens	730755	H. sapiens	KRTAP2-3	keratin associated protein 2-3	GO:0031424 keratinization;GO:0030216 keratinocyte differentiation;GO:0009913 epidermal cell differentiation							0.0	0.0	0.0	0.0	0.0	0.0	0.0	0.0	0.0	0.0	0.0	0.0	0.0	0.0	0.0	0.0	1.0	0.0	0.0	0.0
ENSG00000123405	4778	ensembl_gene_id	H. sapiens	4778	H. sapiens	NFE2	nuclear factor, erythroid 2	GO:0006337 nucleosome disassembly;GO:0045652 regulation of megakaryocyte differentiation;GO:0031498 chromatin disassembly		Transcription factors/Basic domains	Actin filaments;Nucleoplasm(Approved)			(M5945)HALLMARK HEME METABOLISM	0.0	0.0	1.0	0.0	0.0	0.0	0.0	0.0	0.0	1.0	0.0	0.0	0.0	0.0	0.0	0.0	0.0	0.0	0.0	0.0
ENSG00000144834	29114	ensembl_gene_id	H. sapiens	29114	H. sapiens	TAGLN3	transgelin 3	GO:0000122 negative regulation of transcription by RNA polymerase II;GO:0045892 negative regulation of transcription, DNA-templated;GO:1903507 negative regulation of nucleic acid-templated transcription							0.0	0.0	0.0	0.0	0.0	0.0	0.0	0.0	0.0	0.0	0.0	0.0	0.0	0.0	0.0	0.0	0.0	0.0	0.0	0.0
ENSG00000188581	81851	ensembl_gene_id	H. sapiens	81851	H. sapiens	KRTAP1-1	keratin associated protein 1-1	GO:0031424 keratinization;GO:0030216 keratinocyte differentiation;GO:0009913 epidermal cell differentiation							0.0	0.0	0.0	0.0	0.0	0.0	0.0	0.0	0.0	0.0	0.0	0.0	0.0	0.0	0.0	0.0	1.0	0.0	0.0	0.0
ENSG00000133055	4608	ensembl_gene_id	H. sapiens	4608	H. sapiens	MYBPH	myosin binding protein H	GO:0006942 regulation of striated muscle contraction;GO:0006937 regulation of muscle contraction;GO:0006941 striated muscle contraction			Mitochondria;Nucleoli;Nucleus(Approved)			(M5909)HALLMARK MYOGENESIS	0.0	0.0	0.0	0.0	0.0	0.0	0.0	0.0	0.0	0.0	0.0	0.0	0.0	0.0	0.0	0.0	0.0	0.0	0.0	0.0
ENSG00000138135	9023	ensembl_gene_id	H. sapiens	9023	H. sapiens	CH25H	cholesterol 25-hydroxylase	GO:0035754 B cell chemotaxis;GO:0006699 bile acid biosynthetic process;GO:0048247 lymphocyte chemotaxis		Enzymes/ENZYME proteins/Oxidoreductases				(M5948)HALLMARK BILE ACID METABOLISM	0.0	0.0	0.0	0.0	0.0	0.0	1.0	0.0	0.0	0.0	0.0	0.0	0.0	0.0	0.0	0.0	0.0	0.0	0.0	0.0
ENSG00000215853	126638	ensembl_gene_id	H. sapiens	126638	H. sapiens	RPTN	repetin	GO:0070268 cornification;GO:0031424 keratinization;GO:0030216 keratinocyte differentiation					(M5883)NABA SECRETED FACTORS; (M5885)NABA MATRISOME ASSOCIATED; (M5889)NABA MATRISOME		0.0	0.0	0.0	0.0	0.0	0.0	0.0	0.0	0.0	0.0	0.0	0.0	0.0	0.0	1.0	0.0	1.0	0.0	0.0	0.0
ENSG00000187288	63924	ensembl_gene_id	H. sapiens	63924	H. sapiens	CIDEC	cell death inducing DFFA like effector c	GO:0034389 lipid droplet organization;GO:0097194 execution phase of apoptosis;GO:0042981 regulation of apoptotic process							0.0	0.0	0.0	0.0	0.0	0.0	0.0	0.0	0.0	0.0	0.0	0.0	0.0	0.0	0.0	0.0	0.0	0.0	0.0	0.0
ENSG00000150681	64407	ensembl_gene_id	H. sapiens	64407	H. sapiens	RGS18	regulator of G protein signaling 18	GO:0008277 regulation of G protein-coupled receptor signaling pathway;GO:0043547 positive regulation of GTPase activity;GO:0043087 regulation of GTPase activity			Golgi apparatus(Approved)				0.0	0.0	0.0	0.0	0.0	0.0	0.0	0.0	0.0	0.0	0.0	0.0	0.0	0.0	0.0	0.0	0.0	0.0	0.0	0.0
ENSG00000127083	4958	ensembl_gene_id	H. sapiens	4958	H. sapiens	OMD	osteomodulin	GO:0042340 keratan sulfate catabolic process;GO:0018146 keratan sulfate biosynthetic process;GO:0042339 keratan sulfate metabolic process			Endoplasmic reticulum;Nucleoli fibrillar center(Approved)		(M5882)NABA PROTEOGLYCANS; (M5884)NABA CORE MATRISOME; (M5889)NABA MATRISOME	(M5905)HALLMARK ADIPOGENESIS	0.0	0.0	0.0	0.0	1.0	0.0	0.0	1.0	0.0	0.0	0.0	0.0	0.0	0.0	0.0	0.0	0.0	0.0	0.0	0.0
ENSG00000164188	202151	ensembl_gene_id	H. sapiens	202151	H. sapiens	RANBP3L	RAN binding protein 3 like	GO:1901706 mesenchymal cell differentiation involved in bone development;GO:0045663 positive regulation of myoblast differentiation;GO:0045668 negative regulation of osteoblast differentiation			Nucleoplasm(Uncertain)				0.0	0.0	0.0	0.0	1.0	0.0	0.0	0.0	0.0	0.0	0.0	0.0	1.0	0.0	0.0	0.0	0.0	1.0	0.0	0.0
ENSG00000115590	7850	ensembl_gene_id	H. sapiens	7850	H. sapiens	IL1R2	interleukin 1 receptor type 2	GO:0050712 negative regulation of interleukin-1 alpha secretion;GO:0050705 regulation of interleukin-1 alpha secretion;GO:2000660 negative regulation of interleukin-1-mediated signaling pathway		CD markers			(M110)PID IL1 PATHWAY	(M5897)HALLMARK IL6 JAK STAT3 SIGNALING; (M5947)HALLMARK IL2 STAT5 SIGNALING	0.0	0.0	0.0	0.0	0.0	0.0	0.0	0.0	0.0	1.0	0.0	0.0	0.0	0.0	0.0	0.0	0.0	0.0	0.0	0.0
ENSG00000221970	346528	ensembl_gene_id	H. sapiens	346528	H. sapiens	OR2A1	olfactory receptor family 2 subfamily A member 1	GO:0050911 detection of chemical stimulus involved in sensory perception of smell;GO:0050907 detection of chemical stimulus involved in sensory perception;GO:0050906 detection of stimulus involved in sensory perception		G-protein coupled receptors/Odorant/olfactory and gustatory receptors					0.0	0.0	0.0	0.0	0.0	0.0	0.0	0.0	0.0	0.0	0.0	0.0	0.0	0.0	0.0	0.0	0.0	0.0	0.0	0.0
ENSG00000096060	2289	ensembl_gene_id	H. sapiens	2289	H. sapiens	FKBP5	FKBP prolyl isomerase 5	GO:0000413 protein peptidyl-prolyl isomerization;GO:0018208 peptidyl-proline modification;GO:0061077 chaperone-mediated protein folding		Enzymes/ENZYME proteins/Isomerase	Nucleoplasm(Enhanced)		(M115)PID REG GR PATHWAY	(M5908)HALLMARK ANDROGEN RESPONSE; (M5906)HALLMARK ESTROGEN RESPONSE EARLY; (M5907)HALLMARK ESTROGEN RESPONSE LATE	0.0	0.0	0.0	0.0	0.0	0.0	0.0	0.0	0.0	0.0	0.0	0.0	0.0	0.0	0.0	0.0	0.0	0.0	0.0	0.0
ENSG00000165092	216	ensembl_gene_id	H. sapiens	216	H. sapiens	ALDH1A1	aldehyde dehydrogenase 1 family member A1	GO:0061624 fructose catabolic process to hydroxyacetone phosphate and glyceraldehyde-3-phosphate;GO:0006001 fructose catabolic process;GO:0006069 ethanol oxidation		Enzymes/ENZYME proteins/Oxidoreductases	Cytosol(Enhanced)	NADH (Retinal dehydrogenase activity);Vitamin A (Retinal dehydrogenase activity);Tretinoin (Retinal dehydrogenase activity);1,4-Dithiothreitol (Retinal dehydrogenase activity)		(M5949)HALLMARK PEROXISOME; (M5948)HALLMARK BILE ACID METABOLISM; (M5935)HALLMARK FATTY ACID METABOLISM	0.0	0.0	0.0	0.0	0.0	0.0	0.0	0.0	0.0	0.0	0.0	0.0	0.0	0.0	0.0	0.0	0.0	0.0	0.0	0.0
ENSG00000137673	4316	ensembl_gene_id	H. sapiens	4316	H. sapiens	MMP7	matrix metallopeptidase 7	GO:0044849 estrous cycle;GO:0022617 extracellular matrix disassembly;GO:0060135 maternal process involved in female pregnancy		Enzymes/{ENZYME proteins/Hydrolases,Peptidases/Metallopeptidases}	Nucleoplasm;Vesicles(Approved)	Marimastat (Zinc ion binding);(1R)-N,6-DIHYDROXY-7-METHOXY-2-[(4-METHOXYPHENYL)SULFONYL]-1,2,3,4-TETRAHYDROISOQUINOLINE-1-CARBOXAMIDE (Zinc ion binding);N4-HYDROXY-2-ISOBUTYL-N1-(9-OXO-1,8-DIAZA-TRICYCLO[10.6.1.013,18]NONADECA-12(19),13,15,17-TETRAEN-10-YL)-SUCCINAMIDE (Zinc ion binding);5-METHYL-3-(9-OXO-1,8-DIAZA-TRICYCLO[10.6.1.013,18]NONADECA-12(19),13,15,17-TETRAEN-10-YLCARBAMOYL)-HEXANOIC A…	(M198)PID SYNDECAN 1 PATHWAY; (M142)PID AJDISS 2PATHWAY; (M153)PID P75 NTR PATHWAY	(M5946)HALLMARK COAGULATION	0.0	0.0	0.0	0.0	0.0	0.0	0.0	1.0	0.0	0.0	0.0	0.0	0.0	0.0	1.0	0.0	0.0	0.0	0.0	0.0
ENSG00000188305	374872	ensembl_gene_id	H. sapiens	374872	H. sapiens	PEAK3	PEAK family member 3	GO:0008360 regulation of cell shape;GO:0032956 regulation of actin cytoskeleton organization;GO:0022604 regulation of cell morphogenesis	Other						0.0	0.0	0.0	0.0	0.0	0.0	0.0	0.0	0.0	0.0	0.0	0.0	0.0	0.0	0.0	0.0	0.0	0.0	0.0	0.0
ENSG00000117525	2152	ensembl_gene_id	H. sapiens	2152	H. sapiens	F3	coagulation factor III, tissue factor	GO:0002543 activation of blood coagulation via clotting cascade;GO:0007598 blood coagulation, extrinsic pathway;GO:0010641 positive regulation of platelet-derived growth factor receptor signaling pathway		CD markers	Vesicles(Enhanced)	Coagulation factor VIIa Recombinant Human (Protease binding);2-(4-HYDROXY-5-PHENYL-1H-PYRAZOL-3-YL)-1H-BENZOIMIDAZOLE-5-CARBOXAMIDINE (Protease binding);[2'-HYDROXY-3'-(1H-PYRROLO[3,2-C]PYRIDIN-2-YL)-BIPHENYL-3-YLMETHYL]-UREA (Protease binding);{5-(5-AMINO-1H-PYRROLO[3,2-B]PYRIDIN-2-YL)-6-HYDROXY-3'-NITRO-BIPHENYL-3-YL]-ACETIC ACID (Protease binding)		(M5946)HALLMARK COAGULATION; (M5942)HALLMARK UV RESPONSE DN; (M5932)HALLMARK INFLAMMATORY RESPONSE	1.0	0.0	0.0	0.0	0.0	1.0	1.0	0.0	0.0	1.0	0.0	1.0	0.0	0.0	0.0	1.0	0.0	0.0	0.0	0.0
ENSG00000189221	4128	ensembl_gene_id	H. sapiens	4128	H. sapiens	MAOA	monoamine oxidase A	GO:0042420 dopamine catabolic process;GO:0042424 catecholamine catabolic process;GO:0019614 catechol-containing compound catabolic process		Enzymes/ENZYME proteins/Oxidoreductases	Mitochondria(Enhanced)	Amphetamine (Serotonin binding);Phentermine (Serotonin binding);Procaine (Serotonin binding);Tranylcypromine (Serotonin binding);Phenelzine (Serotonin binding);Minaprine (Serotonin binding);Zonisamide (Serotonin binding);Selegiline (Serotonin binding);Procarbazine (Serotonin binding);Moclobemide (Serotonin binding);Isocarboxazid (Serotonin binding);Ephedra (Serotonin binding);MMDA (Serotonin bind…		(M5941)HALLMARK UV RESPONSE UP; (M5935)HALLMARK FATTY ACID METABOLISM; (M5934)HALLMARK XENOBIOTIC METABOLISM	0.0	0.0	0.0	0.0	0.0	0.0	0.0	0.0	0.0	0.0	0.0	0.0	0.0	0.0	0.0	0.0	0.0	0.0	0.0	0.0
ENSG00000171246	4884	ensembl_gene_id	H. sapiens	4884	H. sapiens	NPTX1	neuronal pentraxin 1	GO:0060385 axonogenesis involved in innervation;GO:0098962 regulation of postsynaptic neurotransmitter receptor activity;GO:0060384 innervation							0.0	0.0	0.0	0.0	0.0	0.0	1.0	0.0	0.0	0.0	0.0	0.0	0.0	0.0	0.0	0.0	0.0	0.0	0.0	0.0
ENSG00000154262	23460	ensembl_gene_id	H. sapiens	23460	H. sapiens	ABCA6	ATP binding cassette subfamily A member 6	GO:0006869 lipid transport;GO:0010876 lipid localization;GO:0055085 transmembrane transport		Transporters/Primary Active Transporters	Nucleoplasm(Approved)			(M5948)HALLMARK BILE ACID METABOLISM	0.0	0.0	0.0	0.0	0.0	0.0	0.0	0.0	0.0	0.0	0.0	0.0	0.0	0.0	0.0	0.0	0.0	0.0	0.0	0.0
ENSG00000153294	221393	ensembl_gene_id	H. sapiens	221393	H. sapiens	ADGRF4	adhesion G protein-coupled receptor F4	GO:0007186 G protein-coupled receptor signaling pathway;GO:0007166 cell surface receptor signaling pathway;GO:0007165 signal transduction		G-protein coupled receptors/{Family 2 (B) receptors,GPCRs excl olfactory receptors}	Mitochondria(Uncertain)				0.0	0.0	0.0	0.0	0.0	0.0	0.0	0.0	0.0	0.0	0.0	0.0	0.0	0.0	0.0	0.0	0.0	0.0	0.0	0.0
ENSG00000156127	10538	ensembl_gene_id	H. sapiens	10538	H. sapiens	BATF	basic leucine zipper ATF-like transcription factor	GO:0072540 T-helper 17 cell lineage commitment;GO:0002295 T-helper cell lineage commitment;GO:0045064 T-helper 2 cell differentiation		Transcription factors/Basic domains	Nucleoplasm(Enhanced)			(M5947)HALLMARK IL2 STAT5 SIGNALING; (M5907)HALLMARK ESTROGEN RESPONSE LATE	0.0	0.0	1.0	0.0	0.0	0.0	0.0	0.0	0.0	0.0	0.0	0.0	0.0	0.0	0.0	0.0	0.0	0.0	0.0	0.0
ENSG00000186919	353174	ensembl_gene_id	H. sapiens	353174	H. sapiens	ZACN	zinc activated ion channel	GO:0010043 response to zinc ion;GO:0007268 chemical synaptic transmission;GO:0010038 response to metal ion		Transporters/Transporter channels and pores					0.0	0.0	0.0	0.0	0.0	0.0	0.0	0.0	0.0	0.0	0.0	0.0	0.0	0.0	0.0	0.0	0.0	0.0	0.0	0.0
ENSG00000111913	9750	ensembl_gene_id	H. sapiens	9750	H. sapiens	RIPOR2	RHO family interacting cell polarization regulator 2	GO:1903904 negative regulation of establishment of T cell polarity;GO:2000391 positive regulation of neutrophil extravasation;GO:0060088 auditory receptor cell stereocilium organization							1.0	0.0	1.0	0.0	0.0	0.0	1.0	0.0	0.0	0.0	0.0	0.0	0.0	1.0	0.0	0.0	1.0	1.0	0.0	0.0
ENSG00000163884	28999	ensembl_gene_id	H. sapiens	28999	H. sapiens	KLF15	Kruppel like factor 15	GO:0072112 glomerular visceral epithelial cell differentiation;GO:0046326 positive regulation of glucose import;GO:0072311 glomerular epithelial cell differentiation		Transcription factors/Zinc-coordinating DNA-binding domains					0.0	1.0	0.0	0.0	0.0	0.0	0.0	0.0	0.0	0.0	0.0	0.0	0.0	1.0	0.0	0.0	1.0	0.0	0.0	0.0
ENSG00000152463	55301	ensembl_gene_id	H. sapiens	55301	H. sapiens	OLAH	oleoyl-ACP hydrolase	GO:0051792 medium-chain fatty acid biosynthetic process;GO:0051791 medium-chain fatty acid metabolic process;GO:0006633 fatty acid biosynthetic process		Enzymes/ENZYME proteins/Hydrolases					0.0	0.0	0.0	0.0	0.0	0.0	0.0	0.0	0.0	0.0	0.0	0.0	0.0	0.0	0.0	0.0	0.0	0.0	0.0	0.0
ENSG00000166924	222950	ensembl_gene_id	H. sapiens	222950	H. sapiens	NYAP1	neuronal tyrosine phosphorylated phosphoinositide-3-kinase adaptor 1	GO:0014065 phosphatidylinositol 3-kinase signaling;GO:0048015 phosphatidylinositol-mediated signaling;GO:0048812 neuron projection morphogenesis			Golgi apparatus;Vesicles(Supported)				0.0	0.0	0.0	0.0	0.0	0.0	1.0	0.0	0.0	0.0	0.0	0.0	0.0	0.0	0.0	0.0	0.0	0.0	0.0	0.0
ENSG00000138356	316	ensembl_gene_id	H. sapiens	316	H. sapiens	AOX1	aldehyde oxidase 1	GO:0009115 xanthine catabolic process;GO:0046110 xanthine metabolic process;GO:0006145 purine nucleobase catabolic process		Enzymes/ENZYME proteins/Oxidoreductases		Eniluracil (Xanthine dehydrogenase activity)		(M5934)HALLMARK XENOBIOTIC METABOLISM	0.0	0.0	0.0	0.0	0.0	0.0	0.0	0.0	0.0	0.0	0.0	0.0	0.0	0.0	0.0	0.0	0.0	0.0	0.0	0.0
ENSG00000001084	2729	ensembl_gene_id	H. sapiens	2729	H. sapiens	GCLC	glutamate-cysteine ligase catalytic subunit	GO:1901029 negative regulation of mitochondrial outer membrane permeabilization involved in apoptotic signaling pathway;GO:2000490 negative regulation of hepatic stellate cell activation;GO:0097069 cellular response to thyroxine stimulus		Enzymes/ENZYME proteins/Ligase	Cytosol;Nucleoli;Nucleus(Approved)	L-Glutamic Acid (Magnesium ion binding);L-Cysteine (Magnesium ion binding)		(M5938)HALLMARK REACTIVE OXIGEN SPECIES PATHWAY; (M5934)HALLMARK XENOBIOTIC METABOLISM; (M5937)HALLMARK GLYCOLYSIS	0.0	0.0	1.0	0.0	0.0	0.0	1.0	0.0	1.0	0.0	0.0	0.0	0.0	1.0	0.0	0.0	0.0	0.0	0.0	0.0
ENSG00000169688	4490	ensembl_gene_id	H. sapiens	4490	H. sapiens	MT1B	metallothionein 1B	GO:0010273 detoxification of copper ion;GO:0006882 cellular zinc ion homeostasis;GO:1990169 stress response to copper ion							0.0	0.0	0.0	0.0	0.0	0.0	0.0	0.0	0.0	0.0	0.0	0.0	0.0	0.0	0.0	0.0	0.0	0.0	0.0	0.0
ENSG00000215018	340267	ensembl_gene_id	H. sapiens	340267	H. sapiens	COL28A1	collagen type XXVIII alpha 1 chain	GO:0010951 negative regulation of endopeptidase activity;GO:0010466 negative regulation of peptidase activity;GO:0045861 negative regulation of proteolysis			Cytosol;Nucleoplasm(Approved)		(M3005)NABA COLLAGENS; (M5884)NABA CORE MATRISOME; (M5889)NABA MATRISOME		0.0	0.0	0.0	0.0	0.0	0.0	0.0	1.0	0.0	0.0	0.0	0.0	0.0	0.0	0.0	0.0	0.0	0.0	0.0	0.0
ENSG00000188487	387755	ensembl_gene_id	H. sapiens	387755	H. sapiens	INSC	INSC spindle orientation adaptor protein	GO:0008356 asymmetric cell division;GO:0031647 regulation of protein stability;GO:0051301 cell division							0.0	0.0	0.0	0.0	0.0	0.0	0.0	0.0	0.0	0.0	0.0	0.0	0.0	0.0	0.0	0.0	0.0	0.0	0.0	0.0
ENSG00000108551	51655	ensembl_gene_id	H. sapiens	51655	H. sapiens	RASD1	ras related dexamethasone induced 1	GO:0007263 nitric oxide mediated signal transduction;GO:0045892 negative regulation of transcription, DNA-templated;GO:0019932 second-messenger-mediated signaling			Nucleoplasm;Plasma membrane(Approved)				0.0	0.0	0.0	0.0	0.0	0.0	0.0	0.0	0.0	0.0	0.0	0.0	0.0	0.0	0.0	0.0	0.0	0.0	0.0	0.0
ENSG00000074211	5522	ensembl_gene_id	H. sapiens	5522	H. sapiens	PPP2R2C	protein phosphatase 2 regulatory subunit Bgamma	GO:0070262 peptidyl-serine dephosphorylation;GO:0043666 regulation of phosphoprotein phosphatase activity;GO:0035304 regulation of protein dephosphorylation						(M5915)HALLMARK APICAL JUNCTION	0.0	0.0	0.0	0.0	0.0	0.0	0.0	0.0	0.0	0.0	0.0	0.0	0.0	0.0	0.0	0.0	0.0	0.0	0.0	0.0
ENSG00000174343	55584	ensembl_gene_id	H. sapiens	55584	H. sapiens	CHRNA9	cholinergic receptor nicotinic alpha 9 subunit	GO:0050910 detection of mechanical stimulus involved in sensory perception of sound;GO:0070373 negative regulation of ERK1 and ERK2 cascade;GO:0060079 excitatory postsynaptic potential				Nicotine (Calcium channel activity);Galantamine (Calcium channel activity);Ethanol (Calcium channel activity);ATG003 (Calcium channel activity);Lobeline (Calcium channel activity);RPI-78M (Calcium channel activity);Tetraethylammonium (Calcium channel activity)			0.0	0.0	0.0	1.0	0.0	0.0	0.0	0.0	0.0	0.0	0.0	0.0	0.0	1.0	0.0	0.0	0.0	0.0	0.0	0.0
ENSG00000004799	5166	ensembl_gene_id	H. sapiens	5166	H. sapiens	PDK4	pyruvate dehydrogenase kinase 4	GO:0010510 regulation of acetyl-CoA biosynthetic process from pyruvate;GO:0050812 regulation of acyl-CoA biosynthetic process;GO:0006086 acetyl-CoA biosynthetic process from pyruvate	Atypical: PDK/BCKDK protein kinase family	Enzymes/{ENZYME proteins/Transferases,Kinases/Atypical kinases}		4-[4-(4-methoxyphenyl)-5-methyl-1H-pyrazol-3-yl]benzene-1,3-diol (Pyruvate dehydrogenase (acetyl-transferring) kinase activity)		(M5936)HALLMARK OXIDATIVE PHOSPHORYLATION; (M5934)HALLMARK XENOBIOTIC METABOLISM	0.0	0.0	0.0	0.0	0.0	0.0	0.0	0.0	0.0	0.0	0.0	1.0	0.0	0.0	0.0	0.0	0.0	0.0	0.0	0.0
ENSG00000182175	56963	ensembl_gene_id	H. sapiens	56963	H. sapiens	RGMA	repulsive guidance molecule BMP co-receptor a	GO:0048681 negative regulation of axon regeneration;GO:0070571 negative regulation of neuron projection regeneration;GO:0048679 regulation of axon regeneration			Nucleoplasm(Supported)Cytosol(Approved)		(M181)PID BMP PATHWAY		0.0	0.0	0.0	0.0	0.0	0.0	1.0	0.0	1.0	1.0	0.0	0.0	0.0	0.0	0.0	0.0	0.0	0.0	0.0	0.0
ENSG00000163737	5196	ensembl_gene_id	H. sapiens	5196	H. sapiens	PF4	platelet factor 4	GO:0045651 positive regulation of macrophage differentiation;GO:0045653 negative regulation of megakaryocyte differentiation;GO:0045649 regulation of macrophage differentiation				Drotrecogin alfa (Heparin binding)	(M222)PID CXCR3 PATHWAY; (M5883)NABA SECRETED FACTORS; (M5885)NABA MATRISOME ASSOCIATED	(M5944)HALLMARK ANGIOGENESIS; (M5897)HALLMARK IL6 JAK STAT3 SIGNALING; (M5946)HALLMARK COAGULATION	0.0	0.0	1.0	0.0	0.0	1.0	1.0	0.0	0.0	1.0	0.0	0.0	0.0	0.0	1.0	0.0	0.0	0.0	0.0	0.0
ENSG00000164654	54468	ensembl_gene_id	H. sapiens	54468	H. sapiens	MIOS	meiosis regulator for oocyte development	GO:0034198 cellular response to amino acid starvation;GO:1990928 response to amino acid starvation;GO:0032008 positive regulation of TOR signaling			Cytosol;Nucleoplasm(Enhanced)			(M5942)HALLMARK UV RESPONSE DN	0.0	0.0	0.0	0.0	0.0	0.0	0.0	0.0	0.0	0.0	0.0	0.0	0.0	0.0	0.0	0.0	0.0	0.0	0.0	0.0
ENSG00000154153	54463	ensembl_gene_id	H. sapiens	54463	H. sapiens	RETREG1	reticulophagy regulator 1	GO:0061709 reticulophagy;GO:0061912 selective autophagy;GO:0043524 negative regulation of neuron apoptotic process			Endoplasmic reticulum(Supported)			(M5906)HALLMARK ESTROGEN RESPONSE EARLY	0.0	0.0	0.0	0.0	0.0	0.0	0.0	0.0	0.0	0.0	0.0	0.0	0.0	0.0	0.0	0.0	0.0	0.0	0.0	0.0
ENSG00000152580	285313	ensembl_gene_id	H. sapiens	285313	H. sapiens	IGSF10	immunoglobulin superfamily member 10	GO:2001222 regulation of neuron migration;GO:0001764 neuron migration;GO:0001503 ossification			Intermediate filaments;Nucleoplasm(Approved)	Pyridoxal Phosphate	(M3008)NABA ECM GLYCOPROTEINS; (M5884)NABA CORE MATRISOME; (M5889)NABA MATRISOME		0.0	0.0	0.0	0.0	1.0	0.0	0.0	1.0	0.0	0.0	0.0	0.0	0.0	0.0	0.0	0.0	0.0	0.0	0.0	0.0
ENSG00000148677	27063	ensembl_gene_id	H. sapiens	27063	H. sapiens	ANKRD1	ankyrin repeat domain 1	GO:0043517 positive regulation of DNA damage response, signal transduction by p53 class mediator;GO:1901798 positive regulation of signal transduction by p53 class mediator;GO:0045214 sarcomere organization			Nucleoli fibrillar center;Nucleus(Supported)				0.0	1.0	0.0	0.0	0.0	0.0	1.0	0.0	1.0	0.0	0.0	0.0	0.0	0.0	0.0	1.0	0.0	1.0	0.0	0.0
ENSG00000185432	25840	ensembl_gene_id	H. sapiens	25840	H. sapiens	METTL7A	methyltransferase like 7A	GO:0043312 neutrophil degranulation;GO:0002283 neutrophil activation involved in immune response;GO:0042119 neutrophil activation			Lipid droplets(Supported)				0.0	0.0	0.0	0.0	0.0	0.0	0.0	0.0	0.0	0.0	0.0	0.0	0.0	0.0	0.0	0.0	0.0	0.0	0.0	0.0
ENSG00000171051	2357	ensembl_gene_id	H. sapiens	2357	H. sapiens	FPR1	formyl peptide receptor 1	GO:0002430 complement receptor mediated signaling pathway;GO:0000187 activation of MAPK activity;GO:0043312 neutrophil degranulation		G-protein coupled receptors/{Chemokines and chemotactic factors receptors,GPCRs excl olfactory receptors}	Golgi apparatus;Nucleoli;Nucleus(Approved)	Nedocromil (Receptor activity)	(M174)PID UPA UPAR PATHWAY	(M5932)HALLMARK INFLAMMATORY RESPONSE; (M5913)HALLMARK INTERFERON GAMMA RESPONSE	0.0	0.0	0.0	1.0	0.0	0.0	1.0	0.0	0.0	0.0	0.0	0.0	0.0	0.0	0.0	0.0	0.0	0.0	0.0	0.0
ENSG00000235750	9674	ensembl_gene_id	H. sapiens	9674	H. sapiens	KIAA0040	KIAA0040				Nucleoplasm(Approved)				0.0	0.0	0.0	0.0	0.0	0.0	0.0	0.0	0.0	0.0	0.0	0.0	0.0	0.0	0.0	0.0	0.0	0.0	0.0	0.0
ENSG00000170989	1901	ensembl_gene_id	H. sapiens	1901	H. sapiens	S1PR1	sphingosine-1-phosphate receptor 1	GO:0003245 cardiac muscle tissue growth involved in heart morphogenesis;GO:0051497 negative regulation of stress fiber assembly;GO:0003241 growth involved in heart morphogenesis		CD markers;G-protein coupled receptors/{GPCRs excl olfactory receptors,Lysolipids receptors};Transporters	Vesicles(Supported)		(M155)PID S1P META PATHWAY; (M103)PID S1P S1P1 PATHWAY; (M55)PID S1P S1P3 PATHWAY		1.0	1.0	1.0	0.0	1.0	1.0	1.0	0.0	0.0	0.0	0.0	0.0	0.0	0.0	0.0	0.0	1.0	1.0	0.0	0.0
ENSG00000115594	3554	ensembl_gene_id	H. sapiens	3554	H. sapiens	IL1R1	interleukin 1 receptor type 1	GO:2000556 positive regulation of T-helper 1 cell cytokine production;GO:2000661 positive regulation of interleukin-1-mediated signaling pathway;GO:2000554 regulation of T-helper 1 cell cytokine production		CD markers		Anakinra (Transmembrane signaling receptor activity);SD118 (Transmembrane signaling receptor activity);OMS-103HP (Transmembrane signaling receptor activity)	(M110)PID IL1 PATHWAY; (M12012)ST P38 MAPK PATHWAY; (M3721)ST JNK MAPK PATHWAY	(M5897)HALLMARK IL6 JAK STAT3 SIGNALING; (M5934)HALLMARK XENOBIOTIC METABOLISM; (M5932)HALLMARK INFLAMMATORY RESPONSE	1.0	0.0	0.0	0.0	0.0	0.0	0.0	0.0	0.0	0.0	0.0	0.0	0.0	0.0	0.0	0.0	0.0	0.0	0.0	0.0
ENSG00000149043	90019	ensembl_gene_id	H. sapiens	90019	H. sapiens	SYT8	synaptotagmin 8	GO:0048791 calcium ion-regulated exocytosis of neurotransmitter;GO:0014059 regulation of dopamine secretion;GO:0007340 acrosome reaction			Cell Junctions(Supported)Nucleoplasm(Approved)				0.0	0.0	0.0	0.0	0.0	0.0	0.0	0.0	0.0	0.0	0.0	0.0	0.0	0.0	0.0	0.0	0.0	0.0	0.0	0.0
ENSG00000131471	8639	ensembl_gene_id	H. sapiens	8639	H. sapiens	AOC3	amine oxidase copper containing 3	GO:1902283 negative regulation of primary amine oxidase activity;GO:0051354 negative regulation of oxidoreductase activity;GO:0006805 xenobiotic metabolic process		Enzymes/ENZYME proteins/Oxidoreductases	Cytosol;Golgi apparatus(Approved)	Phenelzine (Tryptamine:oxygen oxidoreductase (deaminating) activity);Hydralazine (Tryptamine:oxygen oxidoreductase (deaminating) activity);6-hydroxydopa quinone (Tryptamine:oxygen oxidoreductase (deaminating) activity)		(M5935)HALLMARK FATTY ACID METABOLISM	0.0	0.0	0.0	0.0	0.0	0.0	0.0	0.0	0.0	0.0	0.0	0.0	0.0	0.0	0.0	0.0	0.0	0.0	0.0	0.0
ENSG00000149485	3992	ensembl_gene_id	H. sapiens	3992	H. sapiens	FADS1	fatty acid desaturase 1	GO:0036109 alpha-linolenic acid metabolic process;GO:0043651 linoleic acid metabolic process;GO:0042759 long-chain fatty acid biosynthetic process				Alpha-Linolenic Acid (Oxidoreductase activity);Icosapent (Oxidoreductase activity)		(M5908)HALLMARK ANDROGEN RESPONSE; (M5949)HALLMARK PEROXISOME; (M5948)HALLMARK BILE ACID METABOLISM	0.0	0.0	0.0	0.0	0.0	0.0	0.0	0.0	0.0	0.0	0.0	0.0	0.0	0.0	0.0	0.0	0.0	0.0	0.0	0.0
ENSG00000213694	1903	ensembl_gene_id	H. sapiens	1903	H. sapiens	S1PR3	sphingosine-1-phosphate receptor 3	GO:1903141 negative regulation of establishment of endothelial barrier;GO:1901551 negative regulation of endothelial cell development;GO:1903140 regulation of establishment of endothelial barrier		G-protein coupled receptors/{GPCRs excl olfactory receptors,Lysolipids receptors}			(M155)PID S1P META PATHWAY; (M55)PID S1P S1P3 PATHWAY		0.0	0.0	0.0	0.0	0.0	0.0	0.0	0.0	0.0	0.0	0.0	0.0	0.0	0.0	0.0	0.0	1.0	0.0	0.0	0.0
ENSG00000172985	344558	ensembl_gene_id	H. sapiens	344558	H. sapiens	SH3RF3	SH3 domain containing ring finger 3	GO:0046330 positive regulation of JNK cascade;GO:0032874 positive regulation of stress-activated MAPK cascade;GO:0046328 regulation of JNK cascade			Nucleoplasm(Enhanced)Centrosome;Cytosol(Approved)				0.0	0.0	0.0	1.0	0.0	0.0	0.0	0.0	0.0	0.0	0.0	0.0	0.0	0.0	0.0	0.0	0.0	0.0	0.0	0.0
ENSG00000185950	8660	ensembl_gene_id	H. sapiens	8660	H. sapiens	IRS2	insulin receptor substrate 2	GO:0010748 negative regulation of plasma membrane long-chain fatty acid transport;GO:0010746 regulation of plasma membrane long-chain fatty acid transport;GO:0015911 plasma membrane long-chain fatty acid transport			Cytosol(Supported)Aggresome(Approved)		(M1718)SIG IL4RECEPTOR IN B LYPHOCYTES; (M125)PID IGF1 PATHWAY; (M233)PID EPO PATHWAY	(M5937)HALLMARK GLYCOLYSIS; (M5891)HALLMARK HYPOXIA; (M5890)HALLMARK TNFA SIGNALING VIA NFKB	1.0	0.0	1.0	0.0	0.0	0.0	1.0	0.0	0.0	0.0	0.0	1.0	0.0	1.0	0.0	0.0	0.0	0.0	0.0	0.0
ENSG00000143127	8515	ensembl_gene_id	H. sapiens	8515	H. sapiens	ITGA10	integrin subunit alpha 10	GO:0007229 integrin-mediated signaling pathway;GO:0007160 cell-matrix adhesion;GO:0031589 cell-substrate adhesion					(M47)PID INTEGRIN CS PATHWAY; (M67)PID ARF6 TRAFFICKING PATHWAY; (M18)PID INTEGRIN1 PATHWAY	(M5915)HALLMARK APICAL JUNCTION	0.0	0.0	0.0	0.0	0.0	0.0	0.0	1.0	0.0	0.0	0.0	0.0	0.0	0.0	0.0	0.0	0.0	0.0	0.0	0.0
ENSG00000187134	1645	ensembl_gene_id	H. sapiens	1645	H. sapiens	AKR1C1	aldo-keto reductase family 1 member C1	GO:0042574 retinal metabolic process;GO:0030299 intestinal cholesterol absorption;GO:0044597 daunorubicin metabolic process		Enzymes/ENZYME proteins/Oxidoreductases	Cytosol(Enhanced)Endoplasmic reticulum(Supported)	NADH (Trans-1,2-dihydrobenzene-1,2-diol dehydrogenase activity);Salicylic acid (Trans-1,2-dihydrobenzene-1,2-diol dehydrogenase activity);Acetylsalicylic acid (Trans-1,2-dihydrobenzene-1,2-diol dehydrogenase activity);2'-Monophosphoadenosine 5'-Diphosphoribose (Trans-1,2-dihydrobenzene-1,2-diol dehydrogenase activity);2-HYDROXY-3,5-DIIODOBENZOIC ACID (Trans-1,2-dihydrobenzene-1,2-diol dehydrogena…			0.0	0.0	0.0	0.0	0.0	0.0	0.0	0.0	0.0	0.0	0.0	0.0	0.0	0.0	0.0	0.0	1.0	0.0	0.0	0.0
ENSG00000157514	1831	ensembl_gene_id	H. sapiens	1831	H. sapiens	TSC22D3	TSC22 domain family member 3	GO:0070236 negative regulation of activation-induced cell death of T cells;GO:0070235 regulation of activation-induced cell death of T cells;GO:0006924 activation-induced cell death of T cells		Transcription factors/Basic domains	Cytosol;Golgi apparatus;Nuclear speckles(Approved)				0.0	0.0	1.0	0.0	0.0	0.0	0.0	0.0	0.0	0.0	0.0	0.0	0.0	0.0	0.0	0.0	0.0	0.0	0.0	0.0
ENSG00000115041	30818	ensembl_gene_id	H. sapiens	30818	H. sapiens	KCNIP3	potassium voltage-gated channel interacting protein 3	GO:1901379 regulation of potassium ion transmembrane transport;GO:0061337 cardiac conduction;GO:0043266 regulation of potassium ion transport						(M5921)HALLMARK COMPLEMENT	0.0	0.0	0.0	0.0	0.0	0.0	0.0	0.0	0.0	0.0	0.0	0.0	0.0	0.0	0.0	0.0	0.0	0.0	0.0	0.0
ENSG00000151632	1646	ensembl_gene_id	H. sapiens	1646	H. sapiens	AKR1C2	aldo-keto reductase family 1 member C2	GO:0071799 cellular response to prostaglandin D stimulus;GO:0071798 response to prostaglandin D;GO:0044597 daunorubicin metabolic process		Enzymes/ENZYME proteins/Oxidoreductases	Cytosol;Endoplasmic reticulum;Nucleoli fibrillar center;Nucleus(Approved)	NADH (Trans-1,2-dihydrobenzene-1,2-diol dehydrogenase activity);Ursodeoxycholic acid (Trans-1,2-dihydrobenzene-1,2-diol dehydrogenase activity);2'-Monophosphoadenosine 5'-Diphosphoribose (Trans-1,2-dihydrobenzene-1,2-diol dehydrogenase activity);(10ALPHA,13ALPHA,14BETA,17ALPHA)-17-HYDROXYANDROST-4-EN-3-ONE (Trans-1,2-dihydrobenzene-1,2-diol dehydrogenase activity)		(M5934)HALLMARK XENOBIOTIC METABOLISM	0.0	0.0	0.0	0.0	0.0	0.0	0.0	0.0	0.0	0.0	0.0	0.0	0.0	0.0	0.0	0.0	1.0	0.0	0.0	0.0
ENSG00000117501	80133	ensembl_gene_id	H. sapiens	80133	H. sapiens	MROH9	maestro heat like repeat family member 9								0.0	0.0	0.0	0.0	0.0	0.0	0.0	0.0	0.0	0.0	0.0	0.0	0.0	0.0	0.0	0.0	0.0	0.0	0.0	0.0
ENSG00000169715	4493	ensembl_gene_id	H. sapiens	4493	H. sapiens	MT1E	metallothionein 1E	GO:0010273 detoxification of copper ion;GO:0006882 cellular zinc ion homeostasis;GO:1990169 stress response to copper ion			Nucleoplasm(Approved)			(M5942)HALLMARK UV RESPONSE DN; (M5891)HALLMARK HYPOXIA	0.0	0.0	0.0	0.0	0.0	0.0	0.0	0.0	0.0	0.0	0.0	0.0	0.0	0.0	0.0	0.0	0.0	0.0	0.0	0.0
ENSG00000167772	51129	ensembl_gene_id	H. sapiens	51129	H. sapiens	ANGPTL4	angiopoietin like 4	GO:0051005 negative regulation of lipoprotein lipase activity;GO:2000352 negative regulation of endothelial cell apoptotic process;GO:0043335 protein unfolding			Nucleoplasm;Vesicles(Approved)		(M5883)NABA SECRETED FACTORS; (M5885)NABA MATRISOME ASSOCIATED; (M5889)NABA MATRISOME	(M5905)HALLMARK ADIPOGENESIS; (M5953)HALLMARK KRAS SIGNALING UP; (M5937)HALLMARK GLYCOLYSIS	0.0	0.0	0.0	0.0	0.0	1.0	0.0	0.0	0.0	0.0	0.0	0.0	0.0	0.0	1.0	0.0	0.0	0.0	0.0	0.0
ENSG00000113805	5067	ensembl_gene_id	H. sapiens	5067	H. sapiens	CNTN3	contactin 3	GO:0007155 cell adhesion;GO:0022610 biological adhesion;GO:0007399 nervous system development							0.0	0.0	0.0	0.0	0.0	0.0	0.0	0.0	0.0	0.0	0.0	0.0	0.0	0.0	0.0	0.0	0.0	0.0	0.0	0.0
ENSG00000142632	128272	ensembl_gene_id	H. sapiens	128272	H. sapiens	ARHGEF19	Rho guanine nucleotide exchange factor 19	GO:0060071 Wnt signaling pathway, planar cell polarity pathway;GO:0090175 regulation of establishment of planar polarity;GO:0001736 establishment of planar polarity			Nuclear bodies(Approved)				0.0	1.0	0.0	0.0	0.0	0.0	0.0	0.0	0.0	1.0	0.0	0.0	0.0	0.0	0.0	1.0	0.0	0.0	0.0	0.0
ENSG00000173432	6288	ensembl_gene_id	H. sapiens	6288	H. sapiens	SAA1	serum amyloid A1	GO:0050716 positive regulation of interleukin-1 secretion;GO:0050704 regulation of interleukin-1 secretion;GO:0048246 macrophage chemotaxis				Human Serum Albumin (Heparin binding);Serum albumin iodonated (Heparin binding)	(M264)PID TOLL ENDOGENOUS PATHWAY		0.0	0.0	1.0	1.0	0.0	0.0	1.0	0.0	0.0	1.0	0.0	0.0	0.0	0.0	0.0	0.0	0.0	0.0	0.0	0.0
ENSG00000150907	2308	ensembl_gene_id	H. sapiens	2308	H. sapiens	FOXO1	forkhead box O1	GO:1903243 negative regulation of cardiac muscle hypertrophy in response to stress;GO:0010616 negative regulation of cardiac muscle adaptation;GO:1903242 regulation of cardiac muscle hypertrophy in response to stress		Transcription factors/Helix-turn-helix domains	Cytosol;Nucleoplasm(Supported)		(M32)PID HDAC CLASSIII PATHWAY; (M249)PID PI3KCI AKT PATHWAY; (M14532)ST PHOSPHOINOSITIDE 3 KINASE PATHWAY	(M5957)HALLMARK PANCREAS BETA CELLS	0.0	0.0	0.0	1.0	1.0	1.0	0.0	0.0	0.0	0.0	0.0	1.0	0.0	1.0	0.0	1.0	0.0	0.0	0.0	0.0
ENSG00000175471	79772	ensembl_gene_id	H. sapiens	79772	H. sapiens	MCTP1	multiple C2 and transmembrane domain containing 1	GO:0048168 regulation of neuronal synaptic plasticity;GO:0046928 regulation of neurotransmitter secretion;GO:0045806 negative regulation of endocytosis			Cytosol;Nucleoplasm(Approved)				0.0	0.0	0.0	0.0	0.0	0.0	0.0	0.0	0.0	0.0	0.0	0.0	0.0	0.0	0.0	0.0	0.0	0.0	0.0	0.0
ENSG00000127129	1907	ensembl_gene_id	H. sapiens	1907	H. sapiens	EDN2	endothelin 2	GO:0003058 hormonal regulation of the force of heart contraction;GO:0014826 vein smooth muscle contraction;GO:0003099 positive regulation of the force of heart contraction by chemical signal			Cytosol(Approved)		(M8)PID ENDOTHELIN PATHWAY; (M145)PID P53 DOWNSTREAM PATHWAY	(M5956)HALLMARK KRAS SIGNALING DN; (M5891)HALLMARK HYPOXIA	1.0	0.0	0.0	0.0	0.0	0.0	1.0	0.0	0.0	0.0	0.0	0.0	0.0	0.0	0.0	0.0	0.0	0.0	0.0	0.0
ENSG00000101955	8406	ensembl_gene_id	H. sapiens	8406	H. sapiens	SRPX	sushi repeat containing protein X-linked	GO:2001241 positive regulation of extrinsic apoptotic signaling pathway in absence of ligand;GO:0060244 negative regulation of cell proliferation involved in contact inhibition;GO:0001845 phagolysosome assembly					(M3008)NABA ECM GLYCOPROTEINS; (M5884)NABA CORE MATRISOME; (M5889)NABA MATRISOME	(M5916)HALLMARK APICAL SURFACE; (M5891)HALLMARK HYPOXIA	0.0	0.0	0.0	0.0	0.0	0.0	0.0	1.0	0.0	0.0	1.0	0.0	0.0	0.0	0.0	1.0	0.0	0.0	0.0	0.0
ENSG00000139209	55089	ensembl_gene_id	H. sapiens	55089	H. sapiens	SLC38A4	solute carrier family 38 member 4	GO:0003333 amino acid transmembrane transport;GO:1905039 carboxylic acid transmembrane transport;GO:0006865 amino acid transport		Transporters/Electrochemical Potential-driven transporters					0.0	0.0	0.0	0.0	0.0	0.0	0.0	0.0	0.0	0.0	0.0	0.0	0.0	0.0	0.0	0.0	0.0	0.0	0.0	0.0
ENSG00000187193	4501	ensembl_gene_id	H. sapiens	4501	H. sapiens	MT1X	metallothionein 1X	GO:0010273 detoxification of copper ion;GO:0036018 cellular response to erythropoietin;GO:0006882 cellular zinc ion homeostasis							0.0	0.0	0.0	0.0	0.0	0.0	0.0	0.0	0.0	0.0	0.0	0.0	0.0	0.0	0.0	0.0	0.0	0.0	0.0	0.0
ENSG00000152779	387700	ensembl_gene_id	H. sapiens	387700	H. sapiens	SLC16A12	solute carrier family 16 member 12	GO:0015881 creatine transmembrane transport;GO:0003333 amino acid transmembrane transport;GO:0072337 modified amino acid transport			Mitochondria(Approved)				0.0	0.0	0.0	0.0	0.0	0.0	0.0	0.0	0.0	0.0	0.0	0.0	0.0	0.0	0.0	0.0	0.0	0.0	0.0	0.0
ENSG00000054392	55733	ensembl_gene_id	H. sapiens	55733	H. sapiens	HHAT	hedgehog acyltransferase	GO:0018345 protein palmitoylation;GO:0006497 protein lipidation;GO:0042158 lipoprotein biosynthetic process			Golgi apparatus(Approved)		(M211)PID HEDGEHOG 2PATHWAY		0.0	0.0	0.0	0.0	0.0	0.0	0.0	0.0	0.0	0.0	0.0	0.0	0.0	0.0	0.0	0.0	0.0	0.0	0.0	0.0
ENSG00000157150	7079	ensembl_gene_id	H. sapiens	7079	H. sapiens	TIMP4	TIMP metallopeptidase inhibitor 4	GO:0051045 negative regulation of membrane protein ectodomain proteolysis;GO:0051043 regulation of membrane protein ectodomain proteolysis;GO:0006509 membrane protein ectodomain proteolysis					(M3468)NABA ECM REGULATORS; (M5885)NABA MATRISOME ASSOCIATED; (M5889)NABA MATRISOME		0.0	0.0	0.0	0.0	0.0	0.0	0.0	0.0	0.0	0.0	0.0	0.0	0.0	0.0	1.0	0.0	0.0	0.0	0.0	0.0
ENSG00000141682	5366	ensembl_gene_id	H. sapiens	5366	H. sapiens	PMAIP1	phorbol-12-myristate-13-acetate-induced protein 1	GO:1900740 positive regulation of protein insertion into mitochondrial membrane involved in apoptotic signaling pathway;GO:1900739 regulation of protein insertion into mitochondrial membrane involved in apoptotic signaling pathway;GO:1901030 positive regulation of mitochondrial outer membrane permeabilization involved in apoptotic signaling pathway			Vesicles(Approved)		(M256)PID TAP63 PATHWAY; (M66)PID MYC ACTIV PATHWAY; (M145)PID P53 DOWNSTREAM PATHWAY	(M5902)HALLMARK APOPTOSIS; (M5906)HALLMARK ESTROGEN RESPONSE EARLY	0.0	0.0	0.0	0.0	0.0	0.0	0.0	0.0	0.0	0.0	0.0	0.0	0.0	0.0	0.0	1.0	0.0	0.0	0.0	0.0
ENSG00000170293	152189	ensembl_gene_id	H. sapiens	152189	H. sapiens	CMTM8	CKLF like MARVEL transmembrane domain containing 8	GO:0042552 myelination;GO:0008366 axon ensheathment;GO:0007272 ensheathment of neurons			Nucleoplasm(Approved)				0.0	0.0	0.0	0.0	0.0	0.0	1.0	0.0	0.0	0.0	0.0	0.0	0.0	0.0	0.0	0.0	0.0	0.0	0.0	0.0
ENSG00000135678	1368	ensembl_gene_id	H. sapiens	1368	H. sapiens	CPM	carboxypeptidase M	GO:0016485 protein processing;GO:0051604 protein maturation;GO:0006518 peptide metabolic process		Enzymes/{ENZYME proteins/Hydrolases,Peptidases/Metallopeptidases}	Vesicles(Uncertain)			(M5921)HALLMARK COMPLEMENT	0.0	0.0	0.0	0.0	0.0	0.0	0.0	0.0	0.0	0.0	0.0	0.0	0.0	0.0	0.0	0.0	0.0	0.0	0.0	0.0
ENSG00000178150	163071	ensembl_gene_id	H. sapiens	163071	H. sapiens	ZNF114	zinc finger protein 114	GO:0006355 regulation of transcription, DNA-templated;GO:1903506 regulation of nucleic acid-templated transcription;GO:0006351 transcription, DNA-templated		Transcription factors/Zinc-coordinating DNA-binding domains	Cytosol;Nucleus(Approved)				0.0	0.0	0.0	0.0	0.0	0.0	0.0	0.0	0.0	0.0	0.0	0.0	0.0	0.0	0.0	0.0	0.0	0.0	0.0	0.0
ENSG00000166689	144100	ensembl_gene_id	H. sapiens	144100	H. sapiens	PLEKHA7	pleckstrin homology domain containing A7	GO:0045218 zonula adherens maintenance;GO:0034334 adherens junction maintenance;GO:0045217 cell-cell junction maintenance			Cell Junctions;Cytosol(Supported)Nucleus(Approved)		(M232)PID ECADHERIN STABILIZATION PATHWAY		0.0	0.0	0.0	0.0	0.0	0.0	0.0	0.0	0.0	0.0	0.0	0.0	0.0	0.0	0.0	0.0	0.0	0.0	0.0	0.0
ENSG00000154258	10350	ensembl_gene_id	H. sapiens	10350	H. sapiens	ABCA9	ATP binding cassette subfamily A member 9	GO:0006869 lipid transport;GO:0010876 lipid localization;GO:0055085 transmembrane transport		Transporters/Primary Active Transporters	Endoplasmic reticulum(Approved)			(M5948)HALLMARK BILE ACID METABOLISM	0.0	0.0	0.0	0.0	0.0	0.0	0.0	0.0	0.0	0.0	0.0	0.0	0.0	0.0	0.0	0.0	0.0	0.0	0.0	0.0
ENSG00000141401	3613	ensembl_gene_id	H. sapiens	3613	H. sapiens	IMPA2	inositol monophosphatase 2	GO:0006021 inositol biosynthetic process;GO:0046855 inositol phosphate dephosphorylation;GO:0071545 inositol phosphate catabolic process		Enzymes/ENZYME proteins/Hydrolases	Mitochondria;Nucleoplasm(Approved)	Lithium (Protein homodimerization activity)		(M5907)HALLMARK ESTROGEN RESPONSE LATE	0.0	0.0	0.0	0.0	0.0	0.0	0.0	0.0	0.0	0.0	0.0	0.0	0.0	0.0	0.0	0.0	0.0	0.0	0.0	0.0
ENSG00000152049	23704	ensembl_gene_id	H. sapiens	23704	H. sapiens	KCNE4	potassium voltage-gated channel subfamily E regulatory subunit 4	GO:1902260 negative regulation of delayed rectifier potassium channel activity;GO:1903817 negative regulation of voltage-gated potassium channel activity;GO:0098915 membrane repolarization during ventricular cardiac muscle cell action potential			Microtubules;Nuclear bodies(Approved)				0.0	0.0	0.0	0.0	0.0	0.0	0.0	0.0	0.0	0.0	0.0	0.0	0.0	0.0	0.0	0.0	0.0	0.0	0.0	0.0
ENSG00000165507	11067	ensembl_gene_id	H. sapiens	11067	H. sapiens	DEPP1	DEPP1 autophagy regulator	GO:0010506 regulation of autophagy;GO:0006914 autophagy;GO:0031329 regulation of cellular catabolic process			Nucleus;Vesicles(Approved)				0.0	0.0	0.0	0.0	0.0	0.0	0.0	0.0	0.0	0.0	0.0	0.0	0.0	0.0	0.0	0.0	0.0	0.0	0.0	0.0
ENSG00000119686	55640	ensembl_gene_id	H. sapiens	55640	H. sapiens	FLVCR2	FLVCR heme transporter 2	GO:0097037 heme export;GO:0015886 heme transport;GO:1901678 iron coordination entity transport		Transporters/Electrochemical Potential-driven transporters					0.0	0.0	0.0	0.0	0.0	0.0	0.0	0.0	0.0	0.0	0.0	0.0	0.0	0.0	0.0	0.0	0.0	0.0	0.0	0.0
ENSG00000152518	678	ensembl_gene_id	H. sapiens	678	H. sapiens	ZFP36L2	ZFP36 ring finger protein like 2	GO:0061158 3'-UTR-mediated mRNA destabilization;GO:1900153 positive regulation of nuclear-transcribed mRNA catabolic process, deadenylation-dependent decay;GO:0061157 mRNA destabilization							0.0	0.0	1.0	0.0	0.0	0.0	0.0	0.0	1.0	1.0	0.0	0.0	0.0	0.0	0.0	0.0	0.0	0.0	0.0	0.0
ENSG00000134824	9415	ensembl_gene_id	H. sapiens	9415	H. sapiens	FADS2	fatty acid desaturase 2	GO:0036109 alpha-linolenic acid metabolic process;GO:0043651 linoleic acid metabolic process;GO:0006636 unsaturated fatty acid biosynthetic process		Enzymes/ENZYME proteins/Oxidoreductases		Alpha-Linolenic Acid (Stearoyl-coa 9-desaturase activity)		(M5892)HALLMARK CHOLESTEROL HOMEOSTASIS; (M5948)HALLMARK BILE ACID METABOLISM; (M5924)HALLMARK MTORC1 SIGNALING	0.0	0.0	0.0	0.0	0.0	0.0	0.0	0.0	0.0	0.0	0.0	0.0	0.0	0.0	0.0	0.0	0.0	0.0	0.0	0.0
ENSG00000170214	147	ensembl_gene_id	H. sapiens	147	H. sapiens	ADRA1B	adrenoceptor alpha 1B	GO:0001994 norepinephrine-epinephrine vasoconstriction involved in regulation of systemic arterial blood pressure;GO:0003321 positive regulation of blood pressure by epinephrine-norepinephrine;GO:0045907 positive regulation of vasoconstriction		G-protein coupled receptors/GPCRs excl olfactory receptors	Plasma membrane(Supported)	Midodrine (Protein heterodimerization activity);Ziprasidone (Protein heterodimerization activity);Cabergoline (Protein heterodimerization activity);Dapiprazole (Protein heterodimerization activity);Amitriptyline (Protein heterodimerization activity);Olanzapine (Protein heterodimerization activity);Alfuzosin (Protein heterodimerization activity);Clozapine (Protein heterodimerization activity);Nore…	(M15)PID LYSOPHOSPHOLIPID PATHWAY	(M5915)HALLMARK APICAL JUNCTION	0.0	0.0	0.0	1.0	0.0	0.0	1.0	0.0	0.0	0.0	0.0	0.0	0.0	0.0	0.0	0.0	0.0	0.0	0.0	0.0
ENSG00000183578	388121	ensembl_gene_id	H. sapiens	388121	H. sapiens	TNFAIP8L3	TNF alpha induced protein 8 like 3	GO:0043552 positive regulation of phosphatidylinositol 3-kinase activity;GO:0090218 positive regulation of lipid kinase activity;GO:0043551 regulation of phosphatidylinositol 3-kinase activity			Cytosol;Nucleoplasm(Approved)				0.0	0.0	0.0	1.0	0.0	0.0	0.0	0.0	0.0	0.0	0.0	0.0	0.0	0.0	0.0	0.0	0.0	0.0	0.0	0.0
ENSG00000117479	10560	ensembl_gene_id	H. sapiens	10560	H. sapiens	SLC19A2	solute carrier family 19 member 2	GO:0071934 thiamine transmembrane transport;GO:0015884 folic acid transport;GO:0015888 thiamine transport		Transporters/Electrochemical Potential-driven transporters	Cytosol(Approved)	Thiamine (Thiamine uptake transmembrane transporter activity)		(M5906)HALLMARK ESTROGEN RESPONSE EARLY; (M5939)HALLMARK P53 PATHWAY	0.0	0.0	0.0	0.0	0.0	0.0	0.0	0.0	0.0	0.0	0.0	0.0	0.0	0.0	0.0	0.0	0.0	0.0	0.0	0.0
ENSG00000133687	83857	ensembl_gene_id	H. sapiens	83857	H. sapiens	TMTC1	transmembrane O-mannosyltransferase targeting cadherins 1	GO:0035269 protein O-linked mannosylation;GO:0035268 protein mannosylation;GO:0006493 protein O-linked glycosylation			Cytosol;Nucleoplasm(Approved)				0.0	0.0	0.0	0.0	0.0	0.0	0.0	0.0	0.0	0.0	0.0	0.0	0.0	0.0	0.0	0.0	0.0	0.0	0.0	0.0
ENSG00000122035	387496	ensembl_gene_id	H. sapiens	387496	H. sapiens	RASL11A	RAS like family 11 member A	GO:0045943 positive regulation of transcription by RNA polymerase I;GO:0006356 regulation of transcription by RNA polymerase I;GO:0006360 transcription by RNA polymerase I			Nuclear bodies(Approved)				0.0	0.0	0.0	0.0	0.0	0.0	0.0	0.0	0.0	0.0	0.0	0.0	0.0	0.0	0.0	0.0	0.0	0.0	0.0	0.0
ENSG00000113389	4883	ensembl_gene_id	H. sapiens	4883	H. sapiens	NPR3	natriuretic peptide receptor 3	GO:0051000 positive regulation of nitric-oxide synthase activity;GO:0035810 positive regulation of urine volume;GO:0120163 negative regulation of cold-induced thermogenesis			Cytosol(Approved)	Nesiritide (Peptide hormone binding)			0.0	0.0	1.0	0.0	0.0	0.0	0.0	0.0	0.0	1.0	1.0	0.0	1.0	0.0	0.0	0.0	0.0	0.0	0.0	0.0
ENSG00000162545	55450	ensembl_gene_id	H. sapiens	55450	H. sapiens	CAMK2N1	calcium/calmodulin dependent protein kinase II inhibitor 1	GO:1904030 negative regulation of cyclin-dependent protein kinase activity;GO:0070373 negative regulation of ERK1 and ERK2 cascade;GO:0043409 negative regulation of MAPK cascade							0.0	0.0	0.0	1.0	0.0	0.0	0.0	0.0	0.0	0.0	1.0	0.0	0.0	1.0	0.0	0.0	0.0	0.0	0.0	0.0
ENSG00000109846	1410	ensembl_gene_id	H. sapiens	1410	H. sapiens	CRYAB	crystallin alpha B	GO:1905907 negative regulation of amyloid fibril formation;GO:1905906 regulation of amyloid fibril formation;GO:0043154 negative regulation of cysteine-type endopeptidase activity involved in apoptotic process			Cytosol;Plasma membrane(Enhanced)			(M5909)HALLMARK MYOGENESIS	0.0	0.0	0.0	0.0	0.0	0.0	0.0	0.0	0.0	0.0	0.0	0.0	0.0	0.0	0.0	0.0	0.0	1.0	0.0	0.0
ENSG00000137491	11309	ensembl_gene_id	H. sapiens	11309	H. sapiens	SLCO2B1	solute carrier organic anion transporter family member 2B1	GO:0015721 bile acid and bile salt transport;GO:0043252 sodium-independent organic anion transport;GO:0015718 monocarboxylic acid transport		Transporters/Electrochemical Potential-driven transporters		Rifampicin (Sodium-independent organic anion transmembrane transporter activity);Ergoloid mesylate (Sodium-independent organic anion transmembrane transporter activity)			0.0	0.0	0.0	0.0	0.0	0.0	0.0	0.0	0.0	0.0	0.0	0.0	0.0	0.0	0.0	0.0	0.0	0.0	0.0	0.0
ENSG00000137959	10964	ensembl_gene_id	H. sapiens	10964	H. sapiens	IFI44L	interferon induced protein 44 like	GO:0051607 defense response to virus;GO:0009615 response to virus;GO:0098542 defense response to other organism			Nucleoplasm(Approved)			(M5911)HALLMARK INTERFERON ALPHA RESPONSE; (M5956)HALLMARK KRAS SIGNALING DN; (M5913)HALLMARK INTERFERON GAMMA RESPONSE	0.0	0.0	0.0	0.0	0.0	0.0	0.0	0.0	0.0	0.0	0.0	0.0	0.0	0.0	0.0	0.0	0.0	0.0	0.0	0.0
ENSG00000131480	314	ensembl_gene_id	H. sapiens	314	H. sapiens	AOC2	amine oxidase copper containing 2	GO:0006584 catecholamine metabolic process;GO:0009712 catechol-containing compound metabolic process;GO:0006805 xenobiotic metabolic process		Enzymes/ENZYME proteins/Oxidoreductases					0.0	0.0	0.0	0.0	0.0	0.0	0.0	0.0	0.0	0.0	0.0	0.0	0.0	0.0	0.0	0.0	0.0	0.0	0.0	0.0
ENSG00000146250	167681	ensembl_gene_id	H. sapiens	167681	H. sapiens	PRSS35	serine protease 35			Enzymes/Peptidases/Serine-type peptidases					0.0	0.0	0.0	0.0	0.0	0.0	0.0	0.0	0.0	0.0	0.0	0.0	0.0	0.0	0.0	0.0	0.0	0.0	0.0	0.0
ENSG00000184226	5101	ensembl_gene_id	H. sapiens	5101	H. sapiens	PCDH9	protocadherin 9	GO:0007156 homophilic cell adhesion via plasma membrane adhesion molecules;GO:0098742 cell-cell adhesion via plasma-membrane adhesion molecules;GO:0098609 cell-cell adhesion			Centrosome;Nucleoplasm(Approved)				0.0	0.0	0.0	0.0	0.0	0.0	0.0	0.0	0.0	0.0	0.0	0.0	0.0	0.0	0.0	0.0	0.0	0.0	0.0	0.0
ENSG00000125148	4502	ensembl_gene_id	H. sapiens	4502	H. sapiens	MT2A	metallothionein 2A	GO:0010273 detoxification of copper ion;GO:0036018 cellular response to erythropoietin;GO:0036016 cellular response to interleukin-3					(M167)PID AP1 PATHWAY	(M5913)HALLMARK INTERFERON GAMMA RESPONSE; (M5891)HALLMARK HYPOXIA; (M5934)HALLMARK XENOBIOTIC METABOLISM	0.0	0.0	0.0	0.0	0.0	0.0	0.0	0.0	0.0	0.0	0.0	0.0	0.0	0.0	0.0	0.0	0.0	0.0	0.0	0.0
ENSG00000071242	6196	ensembl_gene_id	H. sapiens	6196	H. sapiens	RPS6KA2	ribosomal protein S6 kinase A2	GO:0043065 positive regulation of apoptotic process;GO:0043068 positive regulation of programmed cell death;GO:0045786 negative regulation of cell cycle	AGC Ser/Thr protein kinase family	Enzymes/{ENZYME proteins/Transferases,Kinases/AGC Ser/Thr protein kinases}	Nucleoplasm(Supported)		(M4910)ST ERK1 ERK2 MAPK PATHWAY; (M1315)SIG PIP3 SIGNALING IN B LYMPHOCYTES; (M14532)ST PHOSPHOINOSITIDE 3 KINASE PATHWAY	(M5906)HALLMARK ESTROGEN RESPONSE EARLY; (M5907)HALLMARK ESTROGEN RESPONSE LATE	0.0	0.0	0.0	0.0	0.0	0.0	0.0	0.0	0.0	0.0	1.0	1.0	0.0	0.0	0.0	1.0	0.0	0.0	0.0	0.0
ENSG00000090376	11213	ensembl_gene_id	H. sapiens	11213	H. sapiens	IRAK3	interleukin 1 receptor associated kinase 3	GO:0010933 positive regulation of macrophage tolerance induction;GO:0010932 regulation of macrophage tolerance induction;GO:0010936 negative regulation of macrophage cytokine production	TKL Ser/Thr protein kinase family	Enzymes/{ENZYME proteins/Transferases,Kinases/TKL Ser/Thr protein kinases}	Vesicles(Approved)		(M110)PID IL1 PATHWAY		0.0	0.0	1.0	1.0	0.0	0.0	0.0	0.0	0.0	0.0	0.0	0.0	0.0	1.0	0.0	0.0	0.0	0.0	0.0	0.0
ENSG00000125384	5732	ensembl_gene_id	H. sapiens	5732	H. sapiens	PTGER2	prostaglandin E receptor 2	GO:1904346 positive regulation of gastric mucosal blood circulation;GO:1904344 regulation of gastric mucosal blood circulation;GO:1990768 gastric mucosal blood circulation		G-protein coupled receptors/GPCRs excl olfactory receptors		Alprostadil (Prostaglandin e receptor activity);Dinoprostone (Prostaglandin e receptor activity);Misoprostol (Prostaglandin e receptor activity)		(M5947)HALLMARK IL2 STAT5 SIGNALING; (M5932)HALLMARK INFLAMMATORY RESPONSE	0.0	0.0	0.0	0.0	0.0	0.0	0.0	0.0	0.0	0.0	0.0	0.0	0.0	0.0	0.0	0.0	0.0	0.0	0.0	0.0
ENSG00000175264	8534	ensembl_gene_id	H. sapiens	8534	H. sapiens	CHST1	carbohydrate sulfotransferase 1	GO:0018146 keratan sulfate biosynthetic process;GO:0042339 keratan sulfate metabolic process;GO:0006044 N-acetylglucosamine metabolic process		Enzymes/ENZYME proteins/Transferases				(M5937)HALLMARK GLYCOLYSIS	0.0	0.0	0.0	0.0	0.0	0.0	0.0	0.0	0.0	0.0	0.0	0.0	0.0	0.0	0.0	0.0	0.0	0.0	0.0	0.0
ENSG00000143196	1805	ensembl_gene_id	H. sapiens	1805	H. sapiens	DPT	dermatopontin	GO:0030199 collagen fibril organization;GO:0030198 extracellular matrix organization;GO:0043062 extracellular structure organization			Vesicles(Approved)		(M3008)NABA ECM GLYCOPROTEINS; (M5884)NABA CORE MATRISOME; (M5889)NABA MATRISOME		0.0	0.0	0.0	0.0	0.0	0.0	0.0	1.0	0.0	0.0	1.0	0.0	0.0	0.0	0.0	0.0	0.0	0.0	0.0	0.0
ENSG00000135821	2752	ensembl_gene_id	H. sapiens	2752	H. sapiens	GLUL	glutamate-ammonia ligase	GO:0019676 ammonia assimilation cycle;GO:0006542 glutamine biosynthetic process;GO:0006538 glutamate catabolic process		Enzymes/ENZYME proteins/Ligase;Enzymes/ENZYME proteins/Lyases	Cytosol(Enhanced)Mitochondria(Supported)	L-Glutamine (Manganese ion binding);L-Glutamic Acid (Manganese ion binding)		(M5935)HALLMARK FATTY ACID METABOLISM	0.0	0.0	0.0	0.0	0.0	1.0	0.0	0.0	0.0	0.0	0.0	0.0	0.0	0.0	0.0	0.0	0.0	0.0	0.0	0.0
ENSG00000134042	83876	ensembl_gene_id	H. sapiens	83876	H. sapiens	MRO	maestro								0.0	0.0	0.0	0.0	0.0	0.0	0.0	0.0	0.0	0.0	0.0	0.0	0.0	0.0	0.0	0.0	0.0	0.0	0.0	0.0
ENSG00000140323	85455	ensembl_gene_id	H. sapiens	85455	H. sapiens	DISP2	dispatched RND transporter family member 2	GO:0007224 smoothened signaling pathway;GO:0007166 cell surface receptor signaling pathway;GO:0007165 signal transduction			Nucleoplasm;Vesicles(Approved)				0.0	0.0	0.0	0.0	0.0	0.0	0.0	0.0	0.0	0.0	0.0	0.0	0.0	0.0	0.0	0.0	0.0	0.0	0.0	0.0
ENSG00000197442	4217	ensembl_gene_id	H. sapiens	4217	H. sapiens	MAP3K5	mitogen-activated protein kinase kinase kinase 5	GO:0007257 activation of JUN kinase activity;GO:0010666 positive regulation of cardiac muscle cell apoptotic process;GO:1900745 positive regulation of p38MAPK cascade	STE Ser/Thr protein kinase family	Enzymes/{ENZYME proteins/Transferases,Kinases/STE Ser/Thr protein kinases}	Cytosol(Supported)		(M20)PID P38 MKK3 6PATHWAY; (M249)PID PI3KCI AKT PATHWAY; (M197)PID HIV NEF PATHWAY		0.0	0.0	0.0	1.0	0.0	0.0	0.0	0.0	0.0	1.0	0.0	0.0	0.0	0.0	0.0	1.0	0.0	1.0	0.0	0.0
ENSG00000173210	22885	ensembl_gene_id	H. sapiens	22885	H. sapiens	ABLIM3	actin binding LIM protein family member 3	GO:1903955 positive regulation of protein targeting to mitochondrion;GO:1903214 regulation of protein targeting to mitochondrion;GO:1903749 positive regulation of establishment of protein localization to mitochondrion			Cell Junctions;Nucleoplasm;Plasma membrane(Approved)				0.0	0.0	0.0	0.0	0.0	0.0	0.0	0.0	0.0	0.0	0.0	0.0	0.0	0.0	0.0	0.0	0.0	0.0	0.0	0.0
ENSG00000106351	3268	ensembl_gene_id	H. sapiens	3268	H. sapiens	AGFG2	ArfGAP with FG repeats 2	GO:0043547 positive regulation of GTPase activity;GO:0043087 regulation of GTPase activity;GO:0051345 positive regulation of hydrolase activity							0.0	0.0	0.0	0.0	0.0	0.0	0.0	0.0	0.0	0.0	0.0	0.0	0.0	0.0	0.0	0.0	0.0	0.0	0.0	0.0
ENSG00000130592	4046	ensembl_gene_id	H. sapiens	4046	H. sapiens	LSP1	lymphocyte specific protein 1	GO:0006968 cellular defense response;GO:0006952 defense response;GO:0006950 response to stress			Plasma membrane(Supported)		(M199)PID P38 MK2 PATHWAY	(M5938)HALLMARK REACTIVE OXIGEN SPECIES PATHWAY; (M5909)HALLMARK MYOGENESIS	0.0	0.0	0.0	0.0	0.0	0.0	0.0	0.0	0.0	0.0	0.0	0.0	0.0	0.0	0.0	0.0	0.0	0.0	0.0	0.0
ENSG00000164112	132332	ensembl_gene_id	H. sapiens	132332	H. sapiens	TMEM155	transmembrane protein 155								0.0	0.0	0.0	0.0	0.0	0.0	0.0	0.0	0.0	0.0	0.0	0.0	0.0	0.0	0.0	0.0	0.0	0.0	0.0	0.0
ENSG00000166741	4837	ensembl_gene_id	H. sapiens	4837	H. sapiens	NNMT	nicotinamide N-methyltransferase	GO:0034356 NAD biosynthesis via nicotinamide riboside salvage pathway;GO:0009435 NAD biosynthetic process;GO:0019674 NAD metabolic process		Enzymes/ENZYME proteins/Transferases	Cytosol(Supported)Golgi apparatus;Nucleoplasm(Approved)	Niacin (Nicotinamide n-methyltransferase activity)		(M5930)HALLMARK EPITHELIAL MESENCHYMAL TRANSITION	0.0	0.0	0.0	0.0	0.0	0.0	0.0	0.0	0.0	0.0	0.0	0.0	0.0	0.0	0.0	0.0	0.0	0.0	0.0	0.0
ENSG00000140092	10516	ensembl_gene_id	H. sapiens	10516	H. sapiens	FBLN5	fibulin 5	GO:0098867 intramembranous bone growth;GO:2000121 regulation of removal of superoxide radicals;GO:0019430 removal of superoxide radicals			Plasma membrane(Supported)		(M3008)NABA ECM GLYCOPROTEINS; (M5884)NABA CORE MATRISOME; (M5889)NABA MATRISOME	(M5942)HALLMARK UV RESPONSE DN; (M5930)HALLMARK EPITHELIAL MESENCHYMAL TRANSITION	0.0	0.0	0.0	0.0	0.0	1.0	1.0	1.0	0.0	0.0	0.0	0.0	0.0	0.0	0.0	0.0	0.0	1.0	0.0	0.0
ENSG00000171049	2358	ensembl_gene_id	H. sapiens	2358	H. sapiens	FPR2	formyl peptide receptor 2	GO:0061903 positive regulation of 1-phosphatidylinositol-3-kinase activity;GO:0061901 regulation of 1-phosphatidylinositol-3-kinase activity;GO:0010513 positive regulation of phosphatidylinositol biosynthetic process		G-protein coupled receptors/{Chemokines and chemotactic factors receptors,GPCRs excl olfactory receptors}			(M174)PID UPA UPAR PATHWAY		1.0	0.0	0.0	1.0	0.0	0.0	1.0	0.0	0.0	1.0	0.0	0.0	0.0	0.0	0.0	0.0	0.0	0.0	0.0	0.0
ENSG00000073910	10129	ensembl_gene_id	H. sapiens	10129	H. sapiens	FRY	FRY microtubule binding protein	GO:1904428 negative regulation of tubulin deacetylation;GO:0090043 regulation of tubulin deacetylation;GO:0090042 tubulin deacetylation							0.0	0.0	0.0	0.0	0.0	0.0	0.0	0.0	0.0	0.0	0.0	0.0	0.0	1.0	0.0	0.0	0.0	0.0	0.0	0.0
ENSG00000177679	222183	ensembl_gene_id	H. sapiens	222183	H. sapiens	SRRM3	serine/arginine repetitive matrix 3				Intermediate filaments;Microtubules;Plasma membrane(Approved)				0.0	0.0	0.0	0.0	0.0	0.0	0.0	0.0	0.0	0.0	0.0	0.0	0.0	0.0	0.0	0.0	0.0	0.0	0.0	0.0
ENSG00000182902	83733	ensembl_gene_id	H. sapiens	83733	H. sapiens	SLC25A18	solute carrier family 25 member 18	GO:0070778 L-aspartate transmembrane transport;GO:0015810 aspartate transmembrane transport;GO:0015813 L-glutamate transmembrane transport		Transporters/Electrochemical Potential-driven transporters		L-Glutamic Acid (Symporter activity)			0.0	0.0	0.0	0.0	0.0	0.0	0.0	0.0	0.0	0.0	0.0	0.0	0.0	0.0	0.0	0.0	0.0	0.0	0.0	0.0
ENSG00000092068	23428	ensembl_gene_id	H. sapiens	23428	H. sapiens	SLC7A8	solute carrier family 7 member 8	GO:1902475 L-alpha-amino acid transmembrane transport;GO:0015804 neutral amino acid transport;GO:0015807 L-amino acid transport		Transporters/Electrochemical Potential-driven transporters		L-Phenylalanine (Toxin transporter activity);L-Alanine (Toxin transporter activity)			0.0	0.0	0.0	0.0	0.0	0.0	0.0	0.0	0.0	0.0	0.0	0.0	0.0	0.0	0.0	0.0	0.0	0.0	0.0	0.0
ENSG00000078018	4133	ensembl_gene_id	H. sapiens	4133	H. sapiens	MAP2	microtubule associated protein 2	GO:1901953 positive regulation of anterograde dense core granule transport;GO:1903744 positive regulation of anterograde synaptic vesicle transport;GO:1901951 regulation of anterograde dense core granule transport			Cytosol;Nucleoli(Supported)	Estramustine (Structural molecule activity);Paclitaxel (Structural molecule activity);Docetaxel (Structural molecule activity)	(M87)PID LKB1 PATHWAY		1.0	0.0	0.0	0.0	0.0	0.0	1.0	0.0	0.0	0.0	0.0	0.0	0.0	0.0	0.0	0.0	0.0	0.0	0.0	0.0
ENSG00000042832	7038	ensembl_gene_id	H. sapiens	7038	H. sapiens	TG	thyroglobulin	GO:0015705 iodide transport;GO:0006590 thyroid hormone generation;GO:0031641 regulation of myelination						(M5956)HALLMARK KRAS SIGNALING DN	0.0	0.0	0.0	0.0	0.0	0.0	0.0	0.0	0.0	0.0	0.0	0.0	0.0	0.0	0.0	0.0	0.0	0.0	0.0	0.0
ENSG00000134802	29015	ensembl_gene_id	H. sapiens	29015	H. sapiens	SLC43A3	solute carrier family 43 member 3	GO:0055085 transmembrane transport;GO:0006810 transport;GO:0051234 establishment of localization		Transporters/Electrochemical Potential-driven transporters	Plasma membrane;Vesicles(Approved)Nucleoplasm(Uncertain)				0.0	0.0	0.0	0.0	0.0	0.0	0.0	0.0	0.0	0.0	0.0	0.0	0.0	0.0	0.0	0.0	0.0	0.0	0.0	0.0
ENSG00000134531	2012	ensembl_gene_id	H. sapiens	2012	H. sapiens	EMP1	epithelial membrane protein 1	GO:0032060 bleb assembly;GO:0008544 epidermis development;GO:0120031 plasma membrane bounded cell projection assembly			Nucleoplasm(Approved)			(M5902)HALLMARK APOPTOSIS; (M5947)HALLMARK IL2 STAT5 SIGNALING; (M5953)HALLMARK KRAS SIGNALING UP	0.0	0.0	0.0	0.0	0.0	0.0	0.0	0.0	0.0	0.0	0.0	0.0	0.0	0.0	0.0	0.0	1.0	0.0	0.0	0.0
ENSG00000157510	134265	ensembl_gene_id	H. sapiens	134265	H. sapiens	AFAP1L1	actin filament associated protein 1 like 1								0.0	0.0	0.0	0.0	0.0	0.0	0.0	0.0	0.0	0.0	0.0	0.0	0.0	0.0	0.0	0.0	0.0	0.0	0.0	0.0
ENSG00000139508	283537	ensembl_gene_id	H. sapiens	283537	H. sapiens	SLC46A3	solute carrier family 46 member 3	GO:0055085 transmembrane transport;GO:0006810 transport;GO:0051234 establishment of localization		Transporters/Electrochemical Potential-driven transporters	Actin filaments;Cytosol;Plasma membrane(Approved)			(M5934)HALLMARK XENOBIOTIC METABOLISM	0.0	0.0	0.0	0.0	0.0	0.0	0.0	0.0	0.0	0.0	0.0	0.0	0.0	0.0	0.0	0.0	0.0	0.0	0.0	0.0
ENSG00000100906	4792	ensembl_gene_id	H. sapiens	4792	H. sapiens	NFKBIA	NFKB inhibitor alpha	GO:0070427 nucleotide-binding oligomerization domain containing 1 signaling pathway;GO:0070431 nucleotide-binding oligomerization domain containing 2 signaling pathway;GO:0070423 nucleotide-binding oligomerization domain containing signaling pathway		Transcription factors/Immunoglobulin fold	Cytosol(Enhanced)	Acetylsalicylic acid (Ubiquitin protein ligase binding)	(M26)PID NFKAPPAB ATYPICAL PATHWAY; (M37)PID NFKAPPAB CANONICAL PATHWAY; (M7416)ST GAQ PATHWAY	(M5941)HALLMARK UV RESPONSE UP; (M5932)HALLMARK INFLAMMATORY RESPONSE; (M5913)HALLMARK INTERFERON GAMMA RESPONSE	0.0	0.0	1.0	0.0	0.0	0.0	0.0	0.0	0.0	0.0	0.0	0.0	0.0	0.0	0.0	0.0	0.0	0.0	0.0	0.0
ENSG00000250305	57604	ensembl_gene_id	H. sapiens	57604	H. sapiens	TRMT9B	tRNA methyltransferase 9B (putative)	GO:0002098 tRNA wobble uridine modification;GO:0002097 tRNA wobble base modification;GO:0030488 tRNA methylation			Cytosol;Nucleus(Approved)				0.0	0.0	0.0	0.0	0.0	0.0	0.0	0.0	0.0	0.0	0.0	0.0	0.0	0.0	0.0	0.0	0.0	0.0	0.0	0.0
ENSG00000172159	257019	ensembl_gene_id	H. sapiens	257019	H. sapiens	FRMD3	FERM domain containing 3	GO:0031032 actomyosin structure organization;GO:0030036 actin cytoskeleton organization;GO:0030029 actin filament-based process			Golgi apparatus;Nucleoplasm;Plasma membrane(Approved)				0.0	0.0	0.0	0.0	0.0	0.0	0.0	0.0	0.0	0.0	0.0	0.0	0.0	0.0	0.0	0.0	0.0	0.0	0.0	0.0
ENSG00000185112	131583	ensembl_gene_id	H. sapiens	131583	H. sapiens	FAM43A	family with sequence similarity 43 member A				Vesicles(Approved)				0.0	0.0	0.0	0.0	0.0	0.0	0.0	0.0	0.0	0.0	0.0	0.0	0.0	0.0	0.0	0.0	0.0	0.0	0.0	0.0
ENSG00000205364	4499	ensembl_gene_id	H. sapiens	4499	H. sapiens	MT1M	metallothionein 1M	GO:0010273 detoxification of copper ion;GO:0006882 cellular zinc ion homeostasis;GO:1990169 stress response to copper ion							0.0	0.0	0.0	0.0	0.0	0.0	0.0	0.0	0.0	0.0	0.0	0.0	0.0	0.0	0.0	0.0	0.0	0.0	0.0	0.0
ENSG00000119138	687	ensembl_gene_id	H. sapiens	687	H. sapiens	KLF9	Kruppel like factor 9	GO:0071387 cellular response to cortisol stimulus;GO:0051414 response to cortisol;GO:0010839 negative regulation of keratinocyte proliferation		Transcription factors/Zinc-coordinating DNA-binding domains	Nucleoplasm(Supported)Cytosol;Plasma membrane(Approved)			(M5890)HALLMARK TNFA SIGNALING VIA NFKB	0.0	0.0	0.0	0.0	0.0	0.0	0.0	0.0	0.0	0.0	1.0	0.0	0.0	0.0	0.0	0.0	0.0	0.0	0.0	0.0
ENSG00000111305	83445	ensembl_gene_id	H. sapiens	83445	H. sapiens	GSG1	germ cell associated 1			Transporters/Accessory Factors Involved in Transport				(M5951)HALLMARK SPERMATOGENESIS	0.0	0.0	0.0	0.0	0.0	0.0	0.0	0.0	0.0	0.0	0.0	0.0	0.0	0.0	0.0	0.0	0.0	0.0	0.0	0.0
ENSG00000047936	6098	ensembl_gene_id	H. sapiens	6098	H. sapiens	ROS1	ROS proto-oncogene 1, receptor tyrosine kinase	GO:0010966 regulation of phosphate transport;GO:0038083 peptidyl-tyrosine autophosphorylation;GO:0006817 phosphate ion transport	Tyr protein kinase family	Enzymes/{ENZYME proteins/Transferases,Kinases/Tyr protein kinases}	Vesicles(Approved)			(M5932)HALLMARK INFLAMMATORY RESPONSE	0.0	0.0	0.0	1.0	0.0	0.0	0.0	0.0	0.0	0.0	0.0	1.0	0.0	0.0	0.0	0.0	1.0	0.0	0.0	0.0
ENSG00000099860	4616	ensembl_gene_id	H. sapiens	4616	H. sapiens	GADD45B	growth arrest and DNA damage inducible beta	GO:0000185 activation of MAPKKK activity;GO:1900745 positive regulation of p38MAPK cascade;GO:0000186 activation of MAPKK activity			Cytosol;Nucleoplasm(Approved)		(M20)PID P38 MKK3 6PATHWAY; (M54)PID IL12 2PATHWAY	(M5902)HALLMARK APOPTOSIS; (M5947)HALLMARK IL2 STAT5 SIGNALING; (M5930)HALLMARK EPITHELIAL MESENCHYMAL TRANSITION	0.0	0.0	0.0	1.0	0.0	0.0	0.0	0.0	0.0	0.0	0.0	0.0	0.0	1.0	0.0	1.0	0.0	0.0	0.0	0.0
ENSG00000100003	23541	ensembl_gene_id	H. sapiens	23541	H. sapiens	SEC14L2	SEC14 like lipid binding 2	GO:0045540 regulation of cholesterol biosynthetic process;GO:0106118 regulation of sterol biosynthetic process;GO:0090181 regulation of cholesterol metabolic process			Cytosol;Nucleus(Supported)	Vitamin E (Vitamin e binding);Palmitic Acid (Vitamin e binding)	(M236)PID DELTA NP63 PATHWAY	(M5906)HALLMARK ESTROGEN RESPONSE EARLY	0.0	0.0	0.0	0.0	0.0	0.0	0.0	0.0	0.0	0.0	0.0	0.0	0.0	0.0	0.0	0.0	0.0	0.0	0.0	0.0
ENSG00000128335	23780	ensembl_gene_id	H. sapiens	23780	H. sapiens	APOL2	apolipoprotein L2	GO:0006953 acute-phase response;GO:0060135 maternal process involved in female pregnancy;GO:0008203 cholesterol metabolic process			Cytosol;Nuclear bodies;Nucleoplasm(Approved)				0.0	0.0	0.0	0.0	0.0	0.0	0.0	0.0	0.0	0.0	0.0	0.0	0.0	0.0	0.0	0.0	0.0	0.0	0.0	0.0
ENSG00000099998	2687	ensembl_gene_id	H. sapiens	2687	H. sapiens	GGT5	gamma-glutamyltransferase 5	GO:1901750 leukotriene D4 biosynthetic process;GO:1901748 leukotriene D4 metabolic process;GO:0019370 leukotriene biosynthetic process		Enzymes/ENZYME proteins/{Hydrolases,Transferases}	Nucleoli fibrillar center(Approved)				0.0	0.0	0.0	0.0	0.0	0.0	0.0	0.0	0.0	0.0	0.0	0.0	0.0	0.0	0.0	0.0	0.0	0.0	0.0	0.0
ENSG00000116285	54206	ensembl_gene_id	H. sapiens	54206	H. sapiens	ERRFI1	ERBB receptor feedback inhibitor 1	GO:1903243 negative regulation of cardiac muscle hypertrophy in response to stress;GO:0010616 negative regulation of cardiac muscle adaptation;GO:1903242 regulation of cardiac muscle hypertrophy in response to stress			Cytosol(Supported)			(M5892)HALLMARK CHOLESTEROL HOMEOSTASIS; (M5891)HALLMARK HYPOXIA	0.0	0.0	0.0	1.0	0.0	0.0	0.0	0.0	1.0	0.0	0.0	1.0	0.0	1.0	0.0	0.0	1.0	0.0	0.0	0.0
ENSG00000161638	3678	ensembl_gene_id	H. sapiens	3678	H. sapiens	ITGA5	integrin subunit alpha 5	GO:0035313 wound healing, spreading of epidermal cells;GO:1903672 positive regulation of sprouting angiogenesis;GO:0030949 positive regulation of vascular endothelial growth factor receptor signaling pathway		CD markers			(M274)PID LYMPH ANGIOGENESIS PATHWAY; (M47)PID INTEGRIN CS PATHWAY; (M165)PID SYNDECAN 4 PATHWAY	(M5932)HALLMARK INFLAMMATORY RESPONSE; (M5930)HALLMARK EPITHELIAL MESENCHYMAL TRANSITION	1.0	1.0	1.0	0.0	0.0	1.0	0.0	1.0	1.0	1.0	0.0	1.0	0.0	0.0	0.0	0.0	0.0	0.0	0.0	0.0
ENSG00000104415	8840	ensembl_gene_id	H. sapiens	8840	H. sapiens	CCN4	cellular communication network factor 4	GO:0032331 negative regulation of chondrocyte differentiation;GO:0014911 positive regulation of smooth muscle cell migration;GO:0061037 negative regulation of cartilage development			Cytosol(Approved)		(M5493)WNT SIGNALING; (M3008)NABA ECM GLYCOPROTEINS; (M5884)NABA CORE MATRISOME		1.0	0.0	1.0	0.0	1.0	0.0	0.0	1.0	0.0	1.0	0.0	0.0	1.0	0.0	0.0	0.0	0.0	0.0	1.0	0.0
ENSG00000169764	7360	ensembl_gene_id	H. sapiens	7360	H. sapiens	UGP2	UDP-glucose pyrophosphorylase 2	GO:0006065 UDP-glucuronate biosynthetic process;GO:0046398 UDP-glucuronate metabolic process;GO:0019255 glucose 1-phosphate metabolic process		Enzymes/ENZYME proteins/Transferases	Centrosome;Mitochondria;Nucleoplasm(Approved)			(M5937)HALLMARK GLYCOLYSIS; (M5891)HALLMARK HYPOXIA	0.0	0.0	0.0	0.0	0.0	0.0	0.0	0.0	0.0	0.0	0.0	0.0	0.0	0.0	0.0	0.0	0.0	0.0	0.0	0.0
ENSG00000221869	1052	ensembl_gene_id	H. sapiens	1052	H. sapiens	CEBPD	CCAAT enhancer binding protein delta	GO:0045669 positive regulation of osteoblast differentiation;GO:0045778 positive regulation of ossification;GO:0045667 regulation of osteoblast differentiation		Transcription factors/Basic domains	Nucleoplasm(Supported)		(M106)PID HNF3B PATHWAY; (M183)PID IL6 7 PATHWAY; (M236)PID DELTA NP63 PATHWAY	(M5890)HALLMARK TNFA SIGNALING VIA NFKB	0.0	0.0	0.0	0.0	1.0	0.0	0.0	0.0	0.0	0.0	0.0	0.0	0.0	0.0	0.0	0.0	0.0	0.0	0.0	0.0
ENSG00000151726	2180	ensembl_gene_id	H. sapiens	2180	H. sapiens	ACSL1	acyl-CoA synthetase long chain family member 1	GO:0035338 long-chain fatty-acyl-CoA biosynthetic process;GO:0044539 long-chain fatty acid import;GO:0036109 alpha-linolenic acid metabolic process		Enzymes/ENZYME proteins/Ligase	Mitochondria;Nucleus(Supported)	Adenosine monophosphate (Long-chain fatty acid-coa ligase activity);Adenosine triphosphate (Long-chain fatty acid-coa ligase activity)		(M5949)HALLMARK PEROXISOME; (M5948)HALLMARK BILE ACID METABOLISM; (M5935)HALLMARK FATTY ACID METABOLISM	0.0	0.0	0.0	1.0	0.0	0.0	0.0	0.0	0.0	0.0	0.0	0.0	0.0	0.0	0.0	0.0	0.0	0.0	0.0	0.0
ENSG00000102466	2259	ensembl_gene_id	H. sapiens	2259	H. sapiens	FGF14	fibroblast growth factor 14	GO:1901843 positive regulation of high voltage-gated calcium channel activity;GO:1901387 positive regulation of voltage-gated calcium channel activity;GO:1901841 regulation of high voltage-gated calcium channel activity		RAS pathway related proteins	Nucleoli fibrillar center(Approved)		(M5883)NABA SECRETED FACTORS; (M5885)NABA MATRISOME ASSOCIATED; (M5889)NABA MATRISOME		0.0	0.0	0.0	0.0	0.0	0.0	0.0	0.0	0.0	0.0	0.0	0.0	0.0	0.0	1.0	0.0	0.0	0.0	0.0	0.0
[truncated: 399 more rows]

## Sheet: Enrichment
GroupID	Category	Term	Description	LogP	Log(q-value)	InTerm_InList	Genes	Symbols
[truncated: 328 more rows]
