# Supplementary material for: Chromatin Reprogramming via Contact Guidance-Induced Nuclear Deformation Promotes Stem Cell Differentiation
Source: Research Square preprint supplement (doi:10.21203/rs.3.rs-155599/v1), 2021-02-04
Supplement: Supplementary file 2 [file 29c30d31a4568fa7509f2a02.xlsx]

## Sheet: B_vs_A_Differential_Expression_
Ensembl ID	Gene Symbol	Entrez ID	Description	Location	Strand	Log2 Fold Change	LFC Standard Error	Wald Statistic	p Value	FDR Adj p Value	Significant	Status	Base Mean	B	A	flat_Stem_GF_VA_3	flat_Stem_GF_VA_4	pillar_Stem_GP_VA_1	pillar_Stem_GP_VA_2
ENSG00000205426	KRT81	3887	keratin 81	chr12:52285912-52291515	-	-1.16173	0.0714436	-16.2609	1.8709e-59	2.56576e-55	Yes	OK	1901.51	2703.91	1099.1	2850.77	2557.05	1020.04	1178.16
ENSG00000107984	DKK1	22943	dickkopf WNT signaling pathway inhibitor 1	chr10:52314280-52317657	+	-1.03803	0.0645552	-16.0797	3.54006e-58	2.42742e-54	Yes	OK	3017.2	4143.77	1890.63	3981.72	4305.81	1747.09	2034.16
ENSG00000169213	RAB3B	5865	RAB3B, member RAS oncogene family	chr1:51907955-51990764	-	-0.657158	0.0427815	-15.3608	2.9993e-53	1.37108e-49	Yes	OK	8033.76	9893.28	6174.24	9702.52	10084	6092.63	6255.86
ENSG00000011426	ANLN	54443	anillin actin binding protein	chr7:36389802-36453791	+	-0.868939	0.0581177	-14.9514	1.5259e-50	5.23154e-47	Yes	OK	2916.3	3824.13	2008.47	3657.02	3991.23	1951.3	2065.64
ENSG00000131747	TOP2A	7153	topoisomerase (DNA) II alpha	chr17:40388520-40417950	-	-0.859568	0.0591433	-14.5336	7.41677e-48	2.03427e-44	Yes	OK	3332.49	4364.78	2300.19	4329.81	4399.75	2147.61	2452.78
ENSG00000198796	ALPK2	115701	alpha kinase 2	chr18:58481249-58628957	-	-0.97564	0.0705744	-13.8243	1.81923e-43	3.98402e-40	Yes	OK	2044.82	2780.93	1308.72	2781.98	2779.88	1186.76	1430.68
ENSG00000113361	CDH6	1004	cadherin 6	chr5:31193654-31329146	+	-1.03227	0.0747139	-13.8163	2.03355e-43	3.98402e-40	Yes	OK	1121.32	1551.43	691.21	1604.25	1498.62	673.78	708.64
ENSG00000117724	CENPF	1063	centromere protein F	chr1:214603188-214664571	+	-0.885067	0.0686911	-12.8847	5.48582e-38	9.40406e-35	Yes	OK	1788.37	2373.36	1203.37	2351.33	2395.39	1116.72	1290.02
ENSG00000018408	WWTR1	25937	WW domain containing transcription regulator 1	chr3:149517234-149658101	-	0.535029	0.0446741	11.9763	4.7312e-33	7.2093e-30	Yes	OK	8531.29	6905.54	10157	6789.84	7021.25	10448	9866.03
ENSG00000111206	FOXM1	2305	forkhead box M1	chr12:2857680-2877155	-	-0.845769	0.0714443	-11.8382	2.47798e-32	3.3983e-29	Yes	OK	1303.93	1714.17	893.691	1635.89	1792.45	887.851	899.53
ENSG00000117632	STMN1	3925	stathmin 1	chr1:25884185-25906502	-	-0.744962	0.0630694	-11.8118	3.39306e-32	4.23022e-29	Yes	OK	1814.9	2308.78	1321.02	2349.96	2267.6	1359.4	1282.65
ENSG00000117632	MIR3917	100500808	microRNA 3917	chr1:25906361-25906454	-	-0.744962	0.0630694	-11.8118	3.39306e-32	4.23022e-29	Yes	OK	1814.9	2308.78	1321.02	2349.96	2267.6	1359.4	1282.65
ENSG00000088325	TPX2	22974	TPX2, microtubule nucleation factor	chr20:31739100-31801800	+	-0.770102	0.0657746	-11.7082	1.15711e-31	1.32239e-28	Yes	OK	1874.35	2405.6	1343.11	2282.54	2528.65	1307.11	1379.1
ENSG00000113721	PDGFRB	5159	platelet derived growth factor receptor beta	chr5:150113838-150155859	-	0.532902	0.0457057	11.6594	2.05411e-31	2.16693e-28	Yes	OK	10471.8	8485.94	12457.8	8399.59	8572.3	11975.1	12940.4
ENSG00000137804	NUSAP1	51203	nucleolar and spindle associated protein 1	chr15:41332693-41381050	+	-0.92531	0.0801613	-11.5431	7.99849e-31	7.83509e-28	Yes	OK	917.119	1242.8	591.443	1264.41	1221.18	561.319	621.567
ENSG00000134057	CCNB1	891	cyclin B1	chr5:69167009-69178243	+	-0.838524	0.0730476	-11.4791	1.67949e-30	1.5355e-27	Yes	OK	1179.03	1550.13	807.935	1512.06	1588.19	781.309	834.561
ENSG00000066279	ASPM	259266	abnormal spindle microtubule assembly	chr1:197084126-197146694	-	-0.869434	0.0772615	-11.2531	2.23524e-29	1.91588e-26	Yes	OK	1043.24	1387.61	698.858	1323.57	1451.65	679.699	718.017
ENSG00000258947	TUBB3	10381	tubulin beta 3 class III	chr16:89923278-89936097	+	-0.615547	0.0556924	-11.0526	2.12899e-28	1.71747e-25	Yes	OK	5954.03	7285.41	4622.65	7476.39	7094.43	4314.95	4930.34
ENSG00000148773	MKI67	4288	marker of proliferation Ki-67	chr10:128096660-128126204	-	-0.698664	0.0641429	-10.8923	1.2543e-27	9.55637e-25	Yes	OK	2251.97	2831.16	1672.79	2670.53	2991.78	1618.85	1726.72
ENSG00000115129	TP53I3	9540	tumor protein p53 inducible protein 3	chr2:24077432-24085215	-	-0.607922	0.0573637	-10.5977	3.05476e-26	2.20489e-23	Yes	OK	2448.07	2991.03	1905.12	3061.28	2920.79	1864.49	1945.75
ENSG00000198901	PRC1	9055	protein regulator of cytokinesis 1	chr15:90966037-90994651	-	-0.722295	0.0691414	-10.4466	1.51808e-25	1.04095e-22	Yes	OK	1349.96	1712.5	987.424	1699.18	1725.82	1019.06	955.793
ENSG00000185070	FLRT2	23768	fibronectin leucine rich transmembrane protein 2	chr14:85530143-85627926	+	-0.490739	0.0471224	-10.4141	2.13735e-25	1.39579e-22	Yes	OK	7139.13	8395.54	5882.71	8359.69	8431.39	5638.84	6126.59
ENSG00000145358	DDIT4L	115265	DNA damage inducible transcript 4 like	chr4:100185869-100190498	-	-1.18269	0.114229	-10.3537	4.02549e-25	2.50934e-22	Yes	OK	267.032	421.864	112.2	421.011	422.717	89.7716	134.628
ENSG00000170312	CDK1	983	cyclin dependent kinase 1	chr10:60778330-60794852	+	-0.741596	0.0721167	-10.2833	8.38294e-25	4.99842e-22	Yes	OK	1205.83	1543.62	868.042	1560.22	1527.02	836.553	899.53
ENSG00000119927	GPAM	57678	glycerol-3-phosphate acyltransferase, mitochondrial	chr10:112149863-112183779	-	-0.556536	0.0544291	-10.225	1.53274e-24	8.57211e-22	Yes	OK	3030.08	3642.78	2417.37	3651.52	3634.05	2333.07	2501.67
ENSG00000115884	SDC1	6382	syndecan 1	chr2:20200796-20225433	-	-0.478232	0.0467796	-10.2231	1.56266e-24	8.57211e-22	Yes	OK	10758.6	12603.4	8913.79	12957.8	12248.9	8588.48	9239.11
ENSG00000172061	LRRC15	131578	leucine rich repeat containing 15	chr3:194355246-194369743	-	-0.645702	0.0632307	-10.2118	1.75521e-24	9.25808e-22	Yes	OK	2132.31	2641.76	1622.86	2629.26	2654.27	1531.05	1714.67
ENSG00000171241	SHCBP1	79801	SHC binding and spindle associated 1	chr16:46578592-46621402	-	-0.717342	0.0703675	-10.1942	2.10423e-24	1.06879e-21	Yes	OK	1241.68	1575.38	907.982	1545.08	1605.67	899.689	916.275
ENSG00000068489	PRR11	55771	proline rich 11	chr17:59155498-59206709	+	-0.951182	0.0946139	-10.0533	8.88378e-24	4.35115e-21	Yes	OK	592.758	824.015	361.501	756.72	891.309	347.248	375.753
ENSG00000139734	DIAPH3	81624	diaphanous related formin 3	chr13:59774162-60013209	-	-0.783137	0.0784797	-9.97885	1.88633e-23	8.92038e-21	Yes	OK	916.579	1192.29	640.864	1161.22	1223.37	631.361	650.368
ENSG00000146918	NCAPG2	54892	non-SMC condensin II complex subunit G2	chr7:158631168-158704831	-	-0.717661	0.0727117	-9.86995	5.61952e-23	2.56887e-20	Yes	OK	1130.84	1437.6	824.085	1469.41	1405.78	827.674	820.495
ENSG00000184254	ALDH1A3	220	aldehyde dehydrogenase 1 family member A3	chr15:100879691-100916625	+	-0.501341	0.0518024	-9.67797	3.74081e-22	1.65489e-19	Yes	OK	3196.15	3775.02	2617.28	3848.26	3701.77	2627.05	2607.5
ENSG00000103257	SLC7A5	8140	solute carrier family 7 member 5	chr16:87830015-87869499	-	0.472939	0.0491462	9.62311	6.38709e-22	2.73727e-19	Yes	OK	5677.88	4713.48	6642.29	4613.24	4813.73	6398.44	6886.13
ENSG00000091986	CCDC80	151887	coiled-coil domain containing 80	chr3:112604385-112641143	-	-0.415995	0.0434103	-9.58288	9.43751e-22	3.922e-19	Yes	OK	35280.3	40512.2	30048.4	39665.9	41358.5	29284.3	30812.4
ENSG00000125148	MT2A	4502	metallothionein 2A	chr16:56608565-56609497	+	0.435126	0.0456399	9.5339	1.51488e-21	6.11033e-19	Yes	OK	26345.1	22242.2	30448.1	21457.8	23026.6	31169.5	29726.7
ENSG00000140526	ABHD2	11057	abhydrolase domain containing 2	chr15:89088149-89202360	+	0.387423	0.0406904	9.52124	1.7113e-21	6.70537e-19	Yes	OK	15524.2	13388.9	17659.4	13277	13500.7	17306.2	18012.7
ENSG00000137807	KIF23	9493	kinesin family member 23	chr15:69414245-69448427	+	-0.714555	0.0751578	-9.5074	1.9548e-21	7.4467e-19	Yes	OK	1027.13	1306.09	748.17	1285.05	1327.13	761.579	734.762
ENSG00000168528	SERINC2	347735	serine incorporator 2	chr1:31413812-31434680	+	-0.591617	0.062279	-9.49946	2.10986e-21	7.82018e-19	Yes	OK	2131.24	2598.46	1664.02	2659.53	2537.39	1589.25	1738.78
ENSG00000135679	MDM2	4193	MDM2 proto-oncogene	chr12:68809016-68845544	+	-0.381667	0.0412012	-9.2635	1.97835e-20	7.13977e-18	Yes	OK	8061.07	9154.21	6967.92	9203.09	9105.34	7039.67	6896.18
ENSG00000169679	BUB1	699	BUB1 mitotic checkpoint serine/threonine kinase	chr2:110637697-110678107	-	-0.76501	0.0827424	-9.24567	2.33764e-20	8.22011e-18	Yes	OK	767.529	997.052	538.005	983.736	1010.37	545.535	530.475
ENSG00000183287	CCBE1	147372	collagen and calcium binding EGF domains 1	chr18:59430938-59697412	-	-0.642955	0.0695917	-9.23896	2.48914e-20	8.53403e-18	Yes	OK	1366.2	1696.61	1035.79	1651.02	1742.2	1003.27	1068.32
ENSG00000183671	GPR1	2825	G protein-coupled receptor 1	chr2:206175315-206218047	-	-0.579436	0.0628653	-9.21711	3.05224e-20	1.02094e-17	Yes	OK	1900.56	2308.65	1492.47	2279.79	2337.5	1434.37	1550.57
ENSG00000076382	SPAG5	10615	sperm associated antigen 5	chr17:28577564-28599038	-	-0.731142	0.0794171	-9.20635	3.37395e-20	1.10168e-17	Yes	OK	911.273	1168.02	654.53	1132.33	1203.7	674.767	634.293
ENSG00000136542	GALNT5	11227	polypeptide N-acetylgalactosaminyltransferase 5	chr2:157257597-157318489	+	-0.491688	0.0535227	-9.18654	4.05662e-20	1.29378e-17	Yes	OK	4589.83	5408.99	3770.66	5219.99	5597.99	3607.63	3933.69
ENSG00000136108	CKAP2	26586	cytoskeleton associated protein 2	chr13:52455359-52476631	+	-0.554775	0.0604389	-9.1791	4.34723e-20	1.35495e-17	Yes	OK	1910.35	2300.21	1520.49	2288.05	2312.38	1500.47	1540.52
ENSG00000104419	NDRG1	10397	N-myc downstream regulated 1	chr8:133237170-133297304	-	0.373869	0.0408943	9.14231	6.11324e-20	1.86304e-17	Yes	OK	8684.45	7529.03	9839.87	7450.25	7607.81	9886.71	9793.03
ENSG00000168078	PBK	55872	PDZ binding kinase	chr8:27809620-27838095	-	-0.789462	0.0866266	-9.11339	7.98468e-20	2.38048e-17	Yes	OK	674.148	885.482	462.815	870.916	900.048	473.52	452.109
ENSG00000166851	PLK1	5347	polo like kinase 1	chr16:23678771-23690367	+	-0.811149	0.0893571	-9.07762	1.10977e-19	3.23818e-17	Yes	OK	655.242	870.389	440.094	851.654	889.125	413.344	466.845
ENSG00000137309	HMGA1	3159	high mobility group AT-hook 1	chr6:34236799-34246231	+	0.370159	0.040868	9.05744	1.33553e-19	3.81571e-17	Yes	OK	13595.9	11804.5	15387.3	11708.5	11900.5	15696.2	15078.4
ENSG00000126787	DLGAP5	9787	DLG associated protein 5	chr14:55148115-55191678	-	-0.901167	0.0998364	-9.02644	1.77349e-19	4.96361e-17	Yes	OK	456.256	633.211	279.301	632.893	633.529	254.517	304.085
ENSG00000164032	H2AFZ	3015	H2A histone family member Z	chr4:99948086-99950355	-	-0.465041	0.0517623	-8.98417	2.60706e-19	7.15063e-17	Yes	OK	3163	3695.49	2630.51	3760.21	3630.77	2626.07	2634.96
ENSG00000154122	ANKH	56172	ANKH inorganic pyrophosphate transport regulator	chr5:14704799-14871778	-	0.383495	0.042847	8.95035	3.54354e-19	9.52866e-17	Yes	OK	8871.12	7657.88	10084.4	7762.57	7553.19	10302	9866.7
ENSG00000176170	SPHK1	8877	sphingosine kinase 1	chr17:76384608-76387860	+	0.444338	0.0501372	8.86246	7.8269e-19	2.06419e-16	Yes	OK	4532.61	3809.42	5255.79	3954.2	3664.64	5184.06	5327.52
ENSG00000169826	CSGALNACT2	55454	chondroitin sulfate N-acetylgalactosaminyltransferase 2	chr10:43138444-43185306	+	0.572221	0.0646051	8.85722	8.20375e-19	2.12276e-16	Yes	OK	3120.7	2453.99	3787.4	2333.45	2574.53	4043.67	3531.14
ENSG00000135048	TMEM2	23670	transmembrane protein 2	chr9:71683365-71768884	-	-0.500104	0.0574225	-8.70921	3.06006e-18	7.77142e-16	Yes	OK	2321.11	2746.86	1895.35	2764.09	2729.63	1851.66	1939.05
ENSG00000122966	CIT	11113	citron rho-interacting serine/threonine kinase	chr12:119685789-119877291	-	-0.626965	0.0725291	-8.64433	5.41233e-18	1.34954e-15	Yes	OK	1116.53	1382.14	850.92	1392.36	1371.92	859.242	842.598
ENSG00000122966	MIR1178	100302274	microRNA 1178	chr12:119713633-119713724	-	-0.626965	0.0725291	-8.64433	5.41233e-18	1.34954e-15	Yes	OK	1116.53	1382.14	850.92	1392.36	1371.92	859.242	842.598
ENSG00000175063	UBE2C	11065	ubiquitin conjugating enzyme E2 C	chr20:45812575-45816957	+	-0.798638	0.0924835	-8.63547	5.84874e-18	1.43231e-15	Yes	OK	567.311	753.861	380.761	727.827	779.896	365.005	396.517
ENSG00000117399	CDC20	991	cell division cycle 20	chr1:43358954-43363202	+	-0.72927	0.0846833	-8.61173	7.19691e-18	1.73155e-15	Yes	OK	749.629	965.308	533.95	930.077	1000.54	549.481	518.419
ENSG00000168003	SLC3A2	6520	solute carrier family 3 member 2	chr11:62856011-62888883	+	0.354405	0.041247	8.59228	8.52616e-18	2.016e-15	Yes	OK	8566.45	7484.42	9648.49	7425.48	7543.36	9758.47	9538.51
ENSG00000109805	NCAPG	64151	non-SMC condensin I complex subunit G	chr4:17810812-17844864	+	-0.634243	0.0743077	-8.53536	1.39714e-17	3.24753e-15	Yes	OK	1049.94	1304.62	795.258	1329.07	1280.16	794.133	796.382
ENSG00000060982	BCAT1	586	branched chain amino acid transaminase 1	chr12:24810023-24902388	-	0.374802	0.0439256	8.53265	1.43027e-17	3.26912e-15	Yes	OK	6564.51	5684.46	7444.57	5561.2	5807.71	7392.84	7496.31
ENSG00000075223	SEMA3C	10512	semaphorin 3C	chr7:80742537-80919351	-	-0.372829	0.0438436	-8.50361	1.8378e-17	4.13173e-15	Yes	OK	8257.39	9359.75	7155.03	9358.56	9360.93	6941.02	7369.05
ENSG00000145632	PLK2	10769	polo like kinase 2	chr5:58453982-58460139	-	-0.557641	0.0656734	-8.49112	2.04663e-17	4.52702e-15	Yes	OK	1529.51	1848.37	1210.65	1846.4	1850.34	1180.84	1240.45
ENSG00000138160	KIF11	3832	kinesin family member 11	chr10:92593067-92655395	+	-0.624229	0.0736586	-8.47462	2.35845e-17	5.13393e-15	Yes	OK	1169.24	1446.95	891.541	1379.98	1513.92	884.891	898.191
ENSG00000183856	IQGAP3	128239	IQ motif containing GTPase activating protein 3	chr1:156525404-156572604	-	-0.763864	0.0903053	-8.45868	2.70419e-17	5.79457e-15	Yes	OK	636.638	833.546	439.731	785.613	881.479	452.804	426.657
ENSG00000095383	TBC1D2	55357	TBC1 domain family member 2	chr9:98198997-98255721	-	-0.48009	0.0568072	-8.45122	2.88286e-17	6.00676e-15	Yes	OK	4066.86	4781.71	3352	4602.23	4961.19	3175.55	3528.46
ENSG00000131459	GFPT2	9945	glutamine-fructose-6-phosphate transaminase 2	chr5:180300689-180353387	-	0.443906	0.0525277	8.45089	2.89082e-17	6.00676e-15	Yes	OK	11104.5	9317.96	12891	9679.13	8956.79	13583.1	12198.9
ENSG00000154096	THY1	7070	Thy-1 cell surface antigen	chr11:119417940-119424128	-	-0.437676	0.0519304	-8.42811	3.51279e-17	7.1902e-15	Yes	OK	7607.9	8816.07	6399.73	8645.87	8986.28	6026.53	6772.93
ENSG00000182481	KPNA2	3838	karyopherin subunit alpha 2	chr17:68035959-68046859	+	-0.453084	0.0538008	-8.42151	3.71676e-17	7.44462e-15	Yes	OK	2928.61	3408.91	2448.32	3332.32	3485.5	2482.04	2414.6
ENSG00000065357	DGKA	1606	diacylglycerol kinase alpha	chr12:55932027-55954023	+	-0.528067	0.0627114	-8.4206	3.74565e-17	7.44462e-15	Yes	OK	2053.07	2455.6	1650.53	2576.97	2334.23	1653.38	1647.69
ENSG00000123496	IL13RA2	3598	interleukin 13 receptor subunit alpha 2	chrX:115003974-115017644	-	-0.796084	0.0958851	-8.30248	1.01961e-16	1.99757e-14	Yes	OK	596.046	794.412	397.679	835.143	753.681	437.02	358.339
ENSG00000091409	ITGA6	3655	integrin subunit alpha 6	chr2:172427353-172506455	+	-0.590645	0.0712191	-8.29335	1.10102e-16	2.12668e-14	Yes	OK	1276.19	1562.65	989.735	1538.2	1587.1	950	1029.47
ENSG00000161011	SQSTM1	8878	sequestosome 1	chr5:179806387-179838077	+	0.329579	0.0401979	8.19891	2.42582e-16	4.62052e-14	Yes	OK	31036.4	27397.5	34675.2	27184.1	27610.9	35265.4	34085
ENSG00000173559	NABP1	64859	nucleic acid binding protein 1	chr2:191678071-191688522	+	-0.46635	0.0569177	-8.19342	2.53906e-16	4.76996e-14	Yes	OK	4975.67	5822.5	4128.84	6063.39	5581.61	4370.2	3887.47
ENSG00000072571	HMMR	3161	hyaluronan mediated motility receptor	chr5:163460510-163491946	+	-0.882038	0.107721	-8.18814	2.65296e-16	4.91658e-14	Yes	OK	431.682	605.914	257.45	564.1	647.728	299.896	215.003
ENSG00000147872	PLIN2	123	perilipin 2	chr9:19115760-19127606	-	0.353288	0.0435407	8.11396	4.89977e-16	8.95939e-14	Yes	OK	7490.9	6545.21	8436.6	6642.62	6447.79	8603.27	8269.92
ENSG00000122707	RECK	8434	reversion inducing cysteine rich protein with kazal motifs	chr9:36036912-36124455	+	-0.510365	0.0630033	-8.1006	5.46877e-16	9.86826e-14	Yes	OK	2052.18	2441.41	1662.96	2365.09	2517.73	1595.17	1730.74
ENSG00000138778	CENPE	1062	centromere protein E	chr4:103105805-103198409	-	-0.668927	0.0826895	-8.08962	5.985e-16	1.06595e-13	Yes	OK	768.406	971.279	565.534	956.219	986.339	556.386	574.681
ENSG00000122952	ZWINT	11130	ZW10 interacting kinetochore protein	chr10:56357437-56361273	-	-0.608262	0.0753702	-8.07032	7.01138e-16	1.23274e-13	Yes	OK	1092.87	1346.9	838.84	1352.46	1341.33	879.959	797.722
ENSG00000249992	TMEM158	25907	transmembrane protein 158 (gene/pseudogene)	chr3:45224463-45226322	-	0.435706	0.0541895	8.04041	8.9538e-16	1.55433e-13	Yes	OK	6065.88	5106.56	7025.2	5433.25	4779.86	7183.7	6866.71
ENSG00000169607	CKAP2L	150468	cytoskeleton associated protein 2 like	chr2:112736350-112764677	-	-0.666285	0.0851625	-7.82369	5.1295e-15	8.68469e-13	Yes	OK	697.392	882.609	512.174	869.54	895.679	513.967	510.381
ENSG00000154734	ADAMTS1	9510	ADAM metallopeptidase with thrombospondin type 1 motif 1	chr21:26836286-26845409	-	-0.30704	0.0393039	-7.81195	5.63098e-15	9.41748e-13	Yes	OK	18093.8	20066.6	16121	19775.1	20358.1	16067.1	16174.8
ENSG00000137812	KNL1	57082	kinetochore scaffold 1	chr15:40594248-40662683	+	-0.754304	0.0968494	-7.78842	6.78509e-15	1.12109e-12	Yes	OK	572.358	755.899	388.817	689.303	822.495	363.032	414.601
ENSG00000123416	TUBA1B	10376	tubulin alpha 1b	chr12:49127783-49131521	-	-0.340286	0.0438575	-7.7589	8.56708e-15	1.39868e-12	Yes	OK	12152.3	13630.2	10674.5	13186.2	14074.2	10519.1	10829.9
ENSG00000138641	HERC3	8916	HECT and RLD domain containing E3 ubiquitin protein ligase 3	chr4:88592422-88708542	+	-0.395475	0.0510117	-7.75264	9e-15	1.45207e-12	Yes	OK	3438.57	3929.96	2947.18	3841.38	4018.54	2931.88	2962.49
ENSG00000138641	LOC101929134	101929134	uncharacterized LOC101929134	chr4:88523809-88524996	+	-0.395475	0.0510117	-7.75264	9e-15	1.45207e-12	Yes	OK	3438.57	3929.96	2947.18	3841.38	4018.54	2931.88	2962.49
ENSG00000013810	TACC3	10460	transforming acidic coiled-coil containing protein 3	chr4:1721489-1745178	+	-0.59802	0.0772304	-7.74332	9.68554e-15	1.54451e-12	Yes	OK	927.657	1142.08	713.23	1135.08	1149.09	719.159	707.3
ENSG00000164611	PTTG1	9232	pituitary tumor-transforming 1	chr5:160421806-160428744	+	-0.684372	0.0884108	-7.74082	9.87802e-15	1.55709e-12	Yes	OK	666.325	852.062	480.588	843.398	860.725	452.804	508.372
ENSG00000152127	MGAT5	4249	mannosyl (alpha-1,6-)-glycoprotein beta-1,6-N-acetyl-glucosaminyltransferase	chr2:134254258-134454621	+	-0.347801	0.0449897	-7.73069	1.06968e-14	1.66699e-12	Yes	OK	7674.18	8633.44	6714.91	8696.77	8570.11	6494.13	6935.69
ENSG00000137868	STRA6	64220	stimulated by retinoic acid 6	chr15:74194387-74209030	-	-0.704287	0.0914428	-7.70194	1.34011e-14	2.06498e-12	Yes	OK	569.764	734.3	405.229	718.196	750.404	417.29	393.168
ENSG00000129009	ISLR	3671	immunoglobulin superfamily containing leucine rich repeat	chr15:74173745-74176871	+	-0.389812	0.0506601	-7.69465	1.41881e-14	2.16195e-12	Yes	OK	14049.2	16031.9	12066.5	15563.7	16500.1	11421.7	12711.3
ENSG00000119326	CTNNAL1	8727	catenin alpha like 1	chr9:108942568-109013594	-	-0.51055	0.0665244	-7.67464	1.65889e-14	2.5e-12	Yes	OK	1913.64	2281.82	1545.45	2263.28	2300.36	1445.22	1645.68
ENSG00000145681	HAPLN1	1404	hyaluronan and proteoglycan link protein 1	chr5:83638197-83721077	-	-0.625373	0.0815952	-7.66434	1.79749e-14	2.67943e-12	Yes	OK	1028.46	1282.15	774.778	1201.12	1363.18	727.051	822.504
ENSG00000033178	UBA6	55236	ubiquitin like modifier activating enzyme 6	chr4:67615760-67701171	-	-0.327582	0.0427839	-7.65666	1.90834e-14	2.81408e-12	Yes	OK	7242.67	8090.49	6394.84	8245.49	7935.49	6430.01	6359.67
ENSG00000167325	RRM1	6240	ribonucleotide reductase catalytic subunit M1	chr11:4094684-4138925	+	-0.382742	0.050133	-7.63453	2.26646e-14	3.30662e-12	Yes	OK	5309.84	6044.08	4575.6	5807.48	6280.67	4459.97	4691.22
ENSG00000136235	GPNMB	10457	glycoprotein nmb	chr7:23246696-23275110	+	0.409691	0.0541049	7.57216	3.67082e-14	5.29912e-12	Yes	OK	2697.02	2294.59	3099.45	2281.17	2308.01	3089.72	3109.17
ENSG00000137310	TCF19	6941	transcription factor 19	chr6:31158525-31164215	+	-0.506535	0.06692	-7.56926	3.7536e-14	5.36218e-12	Yes	OK	1413.43	1682.52	1144.34	1678.54	1686.5	1126.58	1162.09
ENSG00000157168	NRG1	3084	neuregulin 1	chr8:32646731-32743252	+	-0.777301	0.103039	-7.54375	4.56637e-14	6.456e-12	Yes	OK	2277.13	3066.3	1487.97	3070.91	3061.69	1341.64	1634.29
ENSG00000135723	FHOD1	29109	formin homology 2 domain containing 1	chr16:67229388-67247522	-	0.371742	0.0493776	7.52854	5.13092e-14	7.18014e-12	Yes	OK	3694.25	3199.4	4189.1	3244.26	3154.54	4190.66	4187.54
ENSG00000112984	KIF20A	10112	kinesin family member 20A	chr5:138178727-138187715	+	-0.819473	0.10938	-7.492	6.78315e-14	9.39638e-12	Yes	OK	276.945	384.658	169.233	367.353	401.963	169.678	168.788
ENSG00000131389	SLC6A6	6533	solute carrier family 6 member 6	chr3:14402575-14448185	+	0.34243	0.0458129	7.47453	7.74776e-14	1.06253e-11	Yes	OK	11487.5	10074.5	12900.5	10204.7	9944.22	13412.5	12388.5
ENSG00000177706	FAM20C	56975	FAM20C, golgi associated secretory pathway kinase	chr7:192968-260774	+	-0.396384	0.0532014	-7.45064	9.28868e-14	1.26124e-11	Yes	OK	3998.19	4576.81	3419.56	4543.07	4610.56	3258.41	3580.71
ENSG00000117984	CTSD	1509	cathepsin D	chr11:1752751-1763992	-	0.298565	0.0402473	7.41827	1.18661e-13	1.58114e-11	Yes	OK	41662.6	37236.9	46088.2	36973.3	37500.5	45342.5	46833.9
ENSG00000259207	ITGB3	3690	integrin subunit beta 3	chr17:47253841-47312711	+	0.318801	0.0429757	7.41817	1.18753e-13	1.58114e-11	Yes	OK	12255.8	10856.5	13655.1	10591.3	11121.7	13930.4	13379.8
ENSG00000171848	RRM2	6241	ribonucleotide reductase regulatory subunit M2	chr2:10122735-10131419	+	-0.415148	0.0562264	-7.3835	1.54181e-13	2.03311e-11	Yes	OK	2493.37	2871.06	2115.68	2893.42	2848.69	2164.38	2066.98
ENSG00000160014	CALM3	808	calmodulin 3	chr19:46601073-46610782	+	-0.339778	0.046128	-7.36599	1.75833e-13	2.29654e-11	Yes	OK	5448.81	6113.87	4783.75	5991.84	6235.89	4694.76	4872.74
ENSG00000160014	CALM2	805	calmodulin 2	chr2:47160081-47174207	-	-0.339778	0.046128	-7.36599	1.75833e-13	2.29654e-11	Yes	OK	5448.81	6113.87	4783.75	5991.84	6235.89	4694.76	4872.74
ENSG00000157456	CCNB2	9133	cyclin B2	chr15:59105084-59125045	+	-0.722999	0.0983829	-7.34883	1.99952e-13	2.58692e-11	Yes	OK	446.315	585.14	307.489	558.597	611.683	302.856	312.123
ENSG00000173376	NDNF	79625	neuron derived neurotrophic factor	chr4:121035626-121072518	-	-0.617159	0.0841201	-7.33665	2.19009e-13	2.807e-11	Yes	OK	1102.67	1376.05	829.293	1370.35	1381.75	734.943	923.643
ENSG00000100439	ABHD4	63874	abhydrolase domain containing 4	chr14:22598237-22612359	+	0.387622	0.0529807	7.31629	2.54925e-13	3.23708e-11	Yes	OK	4048.07	3474.47	4621.68	3337.82	3611.11	4747.04	4496.31
ENSG00000167772	ANGPTL4	51129	angiopoietin like 4	chr19:8364126-8374375	+	0.402045	0.0551403	7.29131	3.06963e-13	3.86211e-11	Yes	OK	5959.42	5085.71	6833.13	5374.09	4797.34	7111.68	6554.58
ENSG00000136824	SMC2	10592	structural maintenance of chromosomes 2	chr9:104094259-104141419	+	-0.443366	0.0610135	-7.26669	3.68407e-13	4.59303e-11	Yes	OK	1952.2	2270.84	1633.57	2246.77	2294.9	1677.05	1590.09
ENSG00000106537	TSPAN13	27075	tetraspanin 13	chr7:16753725-16784536	+	-0.527861	0.0729876	-7.2322	4.75215e-13	5.87126e-11	Yes	OK	1098.81	1320.94	876.671	1312.56	1329.32	863.188	890.153
ENSG00000090889	KIF4A	24137	kinesin family member 4A	chrX:70290028-70420924	+	-0.683154	0.0945456	-7.22565	4.98694e-13	6.10633e-11	Yes	OK	495.477	637.722	353.232	634.269	641.175	354.154	352.31
ENSG00000105509	HAS1	3036	hyaluronan synthase 1	chr19:51713111-51723992	-	0.402219	0.055745	7.21533	5.38027e-13	6.52965e-11	Yes	OK	3396.04	2899.12	3892.96	3054.4	2743.83	3891.75	3894.17
ENSG00000138180	CEP55	55165	centrosomal protein 55	chr10:93496631-93529092	+	-0.617778	0.0862339	-7.16399	7.83635e-13	9.42699e-11	Yes	OK	680.713	850.586	510.84	850.278	850.895	495.223	526.456
ENSG00000010292	NCAPD2	9918	non-SMC condensin I complex subunit D2	chr12:6494131-6531966	+	-0.444887	0.0627685	-7.08775	1.36314e-12	1.62558e-10	Yes	OK	1996.83	2327.21	1666.44	2242.64	2411.78	1616.87	1716.01
ENSG00000131386	GALNT15	117248	polypeptide N-acetylgalactosaminyltransferase 15	chr3:16174676-16229746	+	0.819674	0.116012	7.06543	1.60123e-12	1.89304e-10	Yes	OK	205.378	114.343	296.412	123.827	104.86	269.315	323.509
ENSG00000024526	DEPDC1	55635	DEP domain containing 1	chr1:68474151-68497221	-	-0.696507	0.0992967	-7.0144	2.30936e-12	2.70688e-10	Yes	OK	442.062	575.509	308.616	539.335	611.683	307.788	309.444
ENSG00000198826	ARHGAP11A	9824	Rho GTPase activating protein 11A	chr15:32615475-32639937	+	-0.552156	0.0788574	-7.00196	2.52407e-12	2.93349e-10	Yes	OK	909.059	1104.17	713.949	1074.54	1133.8	731.984	695.914
ENSG00000164949	GEM	2669	GTP binding protein overexpressed in skeletal muscle	chr8:94249256-94262319	-	0.532717	0.0761365	6.99687	2.61751e-12	3.01652e-10	Yes	OK	1317.56	1044.19	1590.92	1027.76	1060.61	1707.63	1474.21
ENSG00000164292	RHOBTB3	22836	Rho related BTB domain containing 3	chr5:95731145-95796367	+	-0.295033	0.042189	-6.99313	2.68816e-12	3.05e-10	Yes	OK	9465.48	10465.3	8465.67	10647.7	10282.8	8319.16	8612.18
ENSG00000100234	TIMP3	7078	TIMP metallopeptidase inhibitor 3	chr22:32800815-32863041	+	0.366798	0.0524523	6.99298	2.69105e-12	3.05e-10	Yes	OK	16692	14470	18913.9	14255.2	14684.8	17693.9	20133.9
ENSG00000115758	ODC1	4953	ornithine decarboxylase 1	chr2:10440370-10447799	-	0.350751	0.0502405	6.98143	2.92186e-12	3.28445e-10	Yes	OK	11715.4	10226.7	13204.2	10372.6	10080.8	13944.2	12464.2
ENSG00000113070	HBEGF	1839	heparin binding EGF like growth factor	chr5:140332842-140346603	-	0.592517	0.084898	6.97916	2.96945e-12	3.31081e-10	Yes	OK	1134.44	863.452	1405.43	858.533	868.371	1557.68	1253.18
ENSG00000168077	SCARA3	51435	scavenger receptor class A member 3	chr8:27634059-27673020	+	-0.345095	0.0494572	-6.97764	3.00172e-12	3.31981e-10	Yes	OK	4758.19	5350.28	4166.1	5148.45	5552.11	4124.56	4207.63
ENSG00000006652	IFRD1	3475	interferon related developmental regulator 1	chr7:112450507-112477203	+	0.461277	0.0663566	6.95149	3.61437e-12	3.9654e-10	Yes	OK	1493.1	1234.56	1751.65	1216.25	1252.86	1728.35	1774.95
ENSG00000167779	IGFBP6	3489	insulin like growth factor binding protein 6	chr12:53097651-53102344	+	-0.293281	0.042201	-6.94962	3.66281e-12	3.98665e-10	Yes	OK	8925.24	9861.71	7988.76	10090.5	9632.91	7958.1	8019.42
ENSG00000173706	HEG1	57493	heart development protein with EGF like domains 1	chr3:124965709-125055958	-	-0.313822	0.0451747	-6.94685	3.73536e-12	4.02738e-10	Yes	OK	13810.5	15364.9	12256	14852.3	15877.5	11955.4	12556.6
ENSG00000168461	RAB31	11031	RAB31, member RAS oncogene family	chr18:9708230-9862556	+	0.281471	0.040523	6.94596	3.75897e-12	4.02738e-10	Yes	OK	11516.8	10363.1	12670.5	10536.3	10190	12766.3	12574.7
ENSG00000138182	KIF20B	9585	kinesin family member 20B	chr10:89701589-89774943	+	-0.571711	0.0824036	-6.93794	3.9786e-12	4.22965e-10	Yes	OK	780.169	956.57	603.769	930.077	983.062	604.725	602.813
ENSG00000087586	AURKA	6790	aurora kinase A	chr20:56369388-56392337	-	-0.664633	0.0960014	-6.92316	4.41675e-12	4.65933e-10	Yes	OK	492.76	632.46	353.061	615.007	649.913	336.397	369.725
ENSG00000271303	SRXN1	140809	sulfiredoxin 1	chr20:646623-653370	-	0.322115	0.0465455	6.92043	4.50279e-12	4.71383e-10	Yes	OK	18223.9	16109.6	20338.1	15750.8	16468.5	21158.5	19517.7
ENSG00000095752	IL11	3589	interleukin 11	chr19:55364381-55370463	-	0.752926	0.108857	6.91663	4.62518e-12	4.80528e-10	Yes	OK	1450.71	930.192	1971.23	923.198	937.186	2176.22	1766.24
ENSG00000001461	NIPAL3	57185	NIPA like domain containing 3	chr1:24415754-24472983	+	-0.315202	0.0457541	-6.88905	5.61667e-12	5.79151e-10	Yes	OK	7635.64	8500	6771.29	8255.12	8744.88	6609.56	6933.01
ENSG00000197746	PSAP	5660	prosaposin	chr10:71816282-71851375	-	0.277772	0.0403806	6.87884	6.03406e-12	6.17545e-10	Yes	OK	42970.1	38719.2	47221.1	38118	39320.3	46750.3	47691.9
ENSG00000142627	EPHA2	1969	EPH receptor A2	chr1:16124336-16156109	-	-0.413367	0.0605438	-6.82757	8.63644e-12	8.77335e-10	Yes	OK	2066.4	2383.34	1749.46	2352.71	2413.96	1693.82	1805.09
ENSG00000170961	HAS2	3037	hyaluronan synthase 2	chr8:121613030-121641390	-	-0.261966	0.0387465	-6.76102	1.37027e-11	1.38176e-09	Yes	OK	29647.7	32408.4	26887	32701.3	32115.5	26858.5	26915.6
ENSG00000134686	MIR3605	100500853	microRNA 3605	chr1:33332392-33332492	-	0.334308	0.0496938	6.72736	1.72766e-11	1.72942e-09	Yes	OK	4436.93	3897.96	4975.91	3827.63	3968.29	5119.94	4831.88
ENSG00000134686	PHC2	1912	polyhomeotic homolog 2	chr1:33323622-33349898	-	0.334308	0.0496938	6.72736	1.72766e-11	1.72942e-09	Yes	OK	4436.93	3897.96	4975.91	3827.63	3968.29	5119.94	4831.88
ENSG00000196230	TUBB	203068	tubulin beta class I	chr6:30721548-30725426	+	-0.316044	0.0470385	-6.71883	1.83193e-11	1.82052e-09	Yes	OK	36421.6	40565	32278.2	39378.3	41751.7	31129	33427.3
ENSG00000161513	FDXR	2232	ferredoxin reductase	chr17:74862496-74868753	-	-0.509879	0.0760947	-6.70059	2.07585e-11	2.04808e-09	Yes	OK	1069.48	1282.08	856.873	1290.55	1273.61	812.877	900.87
ENSG00000182752	PAPPA	5069	pappalysin 1	chr9:116153791-116402321	+	-0.323879	0.0484585	-6.68365	2.3307e-11	2.28309e-09	Yes	OK	4105.55	4584.96	3626.13	4494.91	4675	3591.85	3660.41
ENSG00000112742	TTK	7272	TTK protein kinase	chr6:80004604-80042527	+	-0.638222	0.0957364	-6.66645	2.62068e-11	2.54894e-09	Yes	OK	522.129	662.923	381.335	619.134	706.712	393.614	369.055
ENSG00000145934	TENM2	57451	teneurin transmembrane protein 2	chr5:167284837-168264157	+	-0.649534	0.0975632	-6.65757	2.78389e-11	2.68861e-09	Yes	OK	488.014	625.36	350.667	615.007	635.713	323.572	377.763
ENSG00000164176	EDIL3	10085	EGF like repeats and discoidin domains 3	chr5:83940594-84384867	-	0.304054	0.0457009	6.65312	2.8694e-11	2.75181e-09	Yes	OK	11556.9	10296.2	12817.6	10098.8	10493.6	12343.1	13292
ENSG00000136928	GABBR2	9568	gamma-aminobutyric acid type B receptor subunit 2	chr9:98288081-98709197	-	-0.668345	0.100572	-6.64543	3.02326e-11	2.87924e-09	Yes	OK	569.908	738.359	401.457	672.793	803.926	354.154	448.761
ENSG00000106070	GRB10	2887	growth factor receptor bound protein 10	chr7:50590062-50793462	-	0.297526	0.0447813	6.64398	3.05321e-11	2.88771e-09	Yes	OK	6003.8	5362.47	6645.12	5409.86	5315.09	6781.21	6509.04
ENSG00000135074	ADAM19	8728	ADAM metallopeptidase domain 19	chr5:157477303-157575823	-	-0.335645	0.0506982	-6.62045	3.58104e-11	3.36373e-09	Yes	OK	3424.55	3840.38	3008.72	3767.09	3913.68	2996	3021.43
ENSG00000176903	PNMA1	9240	paraneoplastic Ma antigen 1	chr14:73711782-73714425	-	0.335459	0.0507666	6.60788	3.89866e-11	3.63716e-09	Yes	OK	4438.31	3901.47	4975.15	4068.4	3734.54	4948.29	5002.01
ENSG00000197696	NMB	4828	neuromedin B	chr15:84655128-84658571	-	0.511127	0.0775007	6.59513	4.24896e-11	3.93717e-09	Yes	OK	1087.55	872.826	1302.27	917.695	827.956	1250.88	1353.65
ENSG00000115318	LOXL3	84695	lysyl oxidase like 3	chr2:74532258-74549663	-	-0.547074	0.0831999	-6.57542	4.85173e-11	4.46554e-09	Yes	OK	993.151	1209.89	776.416	1119.95	1299.83	730.997	821.835
ENSG00000075218	GTSE1	51512	G2 and S-phase expressed 1	chr22:46296740-46330810	+	-0.658557	0.100303	-6.5657	5.17894e-11	4.73494e-09	Yes	OK	437.935	565.526	310.345	606.752	524.3	301.869	318.821
ENSG00000019186	CYP24A1	1591	cytochrome P450 family 24 subfamily A member 1	chr20:54153448-54173977	-	-0.727738	0.111092	-6.5508	5.72306e-11	5.19775e-09	Yes	OK	264.864	359.74	169.988	385.239	334.241	178.557	161.42
ENSG00000113810	SMC4	10051	structural maintenance of chromosomes 4	chr3:160400558-160434953	+	-0.39504	0.0606771	-6.51053	7.48853e-11	6.72958e-09	Yes	OK	2308.32	2644.74	1971.89	2515.06	2774.42	1959.19	1984.59
ENSG00000136068	FLNB	2317	filamin B	chr3:58008399-58172255	+	-0.332003	0.0509999	-6.50987	7.52141e-11	6.72958e-09	Yes	OK	14421.2	16159.1	12683.4	15653.1	16665.1	12003.7	13363
ENSG00000182541	LIMK2	3985	LIM domain kinase 2	chr22:31248361-31277638	+	-0.371782	0.0571166	-6.50917	7.55692e-11	6.72958e-09	Yes	OK	2614.66	2973.73	2255.59	2999.36	2948.09	2172.27	2338.91
ENSG00000131737	KRT34	3885	keratin 34	chr17:41377668-41382384	-	-0.42968	0.0662936	-6.48146	9.08363e-11	8.03696e-09	Yes	OK	1884.1	2190.26	1577.94	2169.72	2210.8	1480.74	1675.15
ENSG00000132646	PCNA	5111	proliferating cell nuclear antigen	chr20:5114952-5126622	-	-0.332168	0.0512724	-6.4785	9.26409e-11	8.14409e-09	Yes	OK	3247.03	3639.51	2854.55	3688.66	3590.36	2826.32	2882.78
ENSG00000116584	ARHGEF2	9181	Rho/Rac guanine nucleotide exchange factor 2	chr1:155946838-155978175	-	0.336423	0.0520942	6.45797	1.06113e-10	9.26904e-09	Yes	OK	3959.13	3472.77	4445.5	3321.31	3624.22	4458.98	4432.01
ENSG00000184575	XPOT	11260	exportin for tRNA	chr12:64404372-64448683	+	0.280611	0.0435088	6.44954	1.1219e-10	9.73778e-09	Yes	OK	9799.26	8811.71	10786.8	8577.07	9046.35	10974.8	10598.8
ENSG00000143217	NECTIN4	81607	nectin cell adhesion molecule 4	chr1:161070990-161089595	-	-0.70578	0.109458	-6.44793	1.13389e-10	9.77999e-09	Yes	OK	271.911	364.755	179.067	375.608	353.902	174.611	183.523
ENSG00000167552	TUBA1A	7846	tubulin alpha 1a	chr12:49184794-49189324	-	-0.318511	0.0494336	-6.44321	1.16975e-10	1.00262e-08	Yes	OK	7954.68	8872.61	7036.76	8648.62	9096.6	6711.17	7362.35
ENSG00000165304	MELK	9833	maternal embryonic leucine zipper kinase	chr9:36572861-36677683	+	-0.512287	0.0799197	-6.41001	1.45506e-10	1.23942e-08	Yes	OK	871.026	1045.59	696.467	1036.02	1055.15	721.132	671.801
ENSG00000003137	CYP26B1	56603	cytochrome P450 family 26 subfamily B member 1	chr2:72129237-72147862	-	-0.758049	0.118479	-6.39816	1.57259e-10	1.33127e-08	Yes	OK	128.769	191.707	65.8312	217.385	166.028	70.0416	61.6208
ENSG00000164109	MAD2L1	4085	MAD2 mitotic arrest deficient-like 1 (yeast)	chr4:120059423-120066858	-	-0.544047	0.085174	-6.38748	1.68637e-10	1.41883e-08	Yes	OK	709.571	864.886	554.257	840.647	889.125	544.548	563.965
ENSG00000162496	DHRS3	9249	dehydrogenase/reductase 3	chr1:12567909-12596396	-	-0.629548	0.0987315	-6.37636	1.81346e-10	1.51645e-08	Yes	OK	458.662	585.266	332.059	591.617	578.914	307.788	356.329
ENSG00000140525	FANCI	55215	Fanconi anemia complementation group I	chr15:89243962-89317131	+	-0.484127	0.0760356	-6.36711	1.9262e-10	1.60096e-08	Yes	OK	1158.48	1375.02	941.938	1424.01	1326.04	994.393	889.484
ENSG00000177106	EPS8L2	64787	EPS8 like 2	chr11:706119-727727	+	-0.375215	0.059063	-6.35278	2.11453e-10	1.74691e-08	Yes	OK	2397.96	2732.26	2063.66	2802.61	2661.91	1994.7	2132.62
ENSG00000142945	KIF2C	11004	kinesin family member 2C	chr1:44739817-44767766	+	-0.594881	0.0936604	-6.35147	2.13268e-10	1.75135e-08	Yes	OK	554.534	694.347	414.72	696.182	692.512	386.708	442.732
ENSG00000118193	KIF14	9928	kinesin family member 14	chr1:200551496-200618838	-	-0.624252	0.0986621	-6.32717	2.49696e-10	2.0383e-08	Yes	OK	443.789	564.019	323.559	533.831	594.206	321.599	325.519
ENSG00000107104	KANK1	23189	KN motif and ankyrin repeat domains 1	chr9:504694-746106	+	-0.329088	0.0520487	-6.32268	2.57062e-10	2.08601e-08	Yes	OK	3427.78	3838.48	3017.09	3769.84	3907.12	2941.75	3092.43
ENSG00000012048	BRCA1	672	BRCA1, DNA repair associated	chr17:43044294-43125323	-	-0.48718	0.0772538	-6.30623	2.85921e-10	2.30101e-08	Yes	OK	945.788	1124.72	766.852	1093.8	1155.64	769.471	764.232
ENSG00000091136	LAMB1	3912	laminin subunit beta 1	chr7:107923800-108003359	-	-0.256322	0.0406493	-6.30569	2.86913e-10	2.30101e-08	Yes	OK	10785.7	11772.7	9798.73	11738.8	11806.6	9626.28	9971.19
ENSG00000102804	TSC22D1	8848	TSC22 domain family member 1	chr13:44432142-44576565	-	0.2987	0.0474198	6.29907	2.99436e-10	2.37963e-08	Yes	OK	10222.2	9119.8	11324.5	9203.09	9036.52	11843.9	10805.1
ENSG00000170540	ARL6IP1	23204	ADP ribosylation factor like GTPase 6 interacting protein 1	chr16:18791666-18801678	-	-0.346747	0.0550507	-6.29868	3.00186e-10	2.37963e-08	Yes	OK	2548.52	2872.14	2224.9	2856.27	2888.02	2195.95	2253.85
ENSG00000102384	CENPI	2491	centromere protein I	chrX:101099808-101163673	+	-0.642239	0.101989	-6.29714	3.03183e-10	2.38957e-08	Yes	OK	378.078	486.115	270.041	477.421	494.808	278.193	261.889
ENSG00000144583	MARCH4	57574	membrane associated ring-CH-type finger 4	chr2:216257861-216372027	-	-0.584896	0.0931619	-6.27827	3.42355e-10	2.68289e-08	Yes	OK	805.278	1004.86	605.696	990.615	1019.11	522.845	688.546
ENSG00000164932	CTHRC1	115908	collagen triple helix repeat containing 1	chr8:103372432-103383004	+	-0.316583	0.0504979	-6.26924	3.62821e-10	2.82712e-08	Yes	OK	4151.92	4630.53	3673.31	4629.75	4631.31	3541.54	3805.09
ENSG00000114346	ECT2	1894	epithelial cell transforming 2	chr3:172750684-172821474	+	-0.405012	0.0649549	-6.23527	4.50987e-10	3.49426e-08	Yes	OK	1589.55	1831.86	1347.23	1850.52	1813.2	1314.02	1380.44
ENSG00000143631	FLG	2312	filaggrin	chr1:152302174-152325203	-	-0.602356	0.0966212	-6.2342	4.54088e-10	3.49851e-08	Yes	OK	483.526	608.566	358.487	579.235	637.898	347.248	369.725
ENSG00000161800	RACGAP1	29127	Rac GTPase activating protein 1	chr12:49989161-50025557	-	-0.400909	0.0643508	-6.23006	4.66262e-10	3.57224e-08	Yes	OK	1572.79	1808.41	1337.18	1787.23	1829.59	1332.76	1341.59
ENSG00000176890	TYMS	7298	thymidylate synthetase	chr18:657603-673499	+	-0.531981	0.0854209	-6.22777	4.73133e-10	3.60475e-08	Yes	OK	686.199	833.493	538.906	843.398	823.587	538.629	539.182
ENSG00000115170	ACVR1	90	activin A receptor type 1	chr2:157736445-157875111	-	0.28933	0.0464665	6.22664	4.76553e-10	3.61074e-08	Yes	OK	4648.1	4164.45	5131.74	4214.24	4114.66	5181.1	5082.38
ENSG00000134684	YARS	8565	tyrosyl-tRNA synthetase	chr1:32775238-32818032	-	0.286935	0.0461245	6.22086	4.94427e-10	3.72559e-08	Yes	OK	4817.78	4321.2	5314.37	4288.54	4353.87	5242.27	5386.47
ENSG00000152223	EPG5	57724	ectopic P-granules autophagy protein 5 homolog	chr18:45847608-45967339	-	-0.330531	0.0531735	-6.21608	5.09732e-10	3.81992e-08	Yes	OK	4246.39	4759	3733.78	4625.62	4892.37	3576.07	3891.49
ENSG00000166886	NAB2	4665	NGFI-A binding protein 2	chr12:57088893-57095476	+	0.422983	0.0683992	6.18403	6.24841e-10	4.65711e-08	Yes	OK	1572.72	1322.18	1823.26	1313.94	1330.41	1734.27	1912.26
ENSG00000234741	GAS5	60674	growth arrest specific 5 (non-protein coding)	chr1:173863900-173867987	-	0.28573	0.0462354	6.17989	6.41455e-10	4.75509e-08	Yes	OK	4662.3	4182.51	5142.08	4188.1	4176.92	5203.79	5080.37
ENSG00000104635	SLC39A14	23516	solute carrier family 39 member 14	chr8:22367536-22422736	+	0.286687	0.0465832	6.15431	7.54073e-10	5.55987e-08	Yes	OK	6698.3	6004.75	7391.85	5770.33	6239.17	7389.88	7393.83
ENSG00000166033	HTRA1	5654	HtrA serine peptidase 1	chr10:122461524-122514908	+	0.248301	0.0403574	6.15255	7.62485e-10	5.59183e-08	Yes	OK	15609.9	14229.9	16990	14130	14329.8	16669.9	17310.1
ENSG00000163513	TGFBR2	7048	transforming growth factor beta receptor 2	chr3:30606501-30694141	+	-0.278051	0.045287	-6.13976	8.2644e-10	6.02861e-08	Yes	OK	12130.2	13342.6	10917.8	13029.3	13655.8	10549.6	11286
ENSG00000057657	PRDM1	639	PR/SET domain 1	chr6:106086319-106109939	+	-0.649594	0.10588	-6.13522	8.5044e-10	6.17086e-08	Yes	OK	439.857	574.064	305.649	626.014	522.115	266.355	344.943
ENSG00000080986	NDC80	10403	NDC80, kinetochore complex component	chr18:2571510-2616635	+	-0.606316	0.0991885	-6.11277	9.79183e-10	7.06764e-08	Yes	OK	442.713	561.052	324.374	579.235	542.869	305.815	342.933
ENSG00000123473	STIL	6491	SCL/TAL1 interrupting locus	chr1:47250138-47314147	-	-0.548815	0.0899278	-6.10284	1.04203e-09	7.48187e-08	Yes	OK	591.147	724.832	457.462	705.813	743.85	454.777	460.147
ENSG00000167900	TK1	7083	thymidine kinase 1	chr17:78174078-78187204	-	-0.542828	0.0891893	-6.08624	1.1559e-09	8.25628e-08	Yes	OK	683.042	836.77	529.314	843.398	830.141	489.304	569.323
ENSG00000070961	ATP2B1	490	ATPase plasma membrane Ca2+ transporting 1	chr12:89588048-89656067	-	0.263029	0.0433962	6.06111	1.35187e-09	9.60596e-08	Yes	OK	6313.77	5718.28	6909.25	5730.43	5706.13	7010.07	6808.43
ENSG00000186185	KIF18B	146909	kinesin family member 18B	chr17:44924710-44947711	-	-0.610878	0.101145	-6.03964	1.5446e-09	1.0828e-07	Yes	OK	392.164	498.376	285.952	506.314	490.439	295.95	275.954
ENSG00000162616	DNAJB4	11080	DnaJ heat shock protein family (Hsp40) member B4	chr1:77980183-78017964	+	-0.53124	0.0879634	-6.03933	1.54753e-09	1.0828e-07	Yes	OK	6162.18	7500.47	4823.89	7337.43	7663.51	4481.67	5166.1
ENSG00000103888	CEMIP	57214	cell migration inducing hyaluronan binding protein	chr15:80779342-80951662	+	0.274377	0.0455117	6.02871	1.65271e-09	1.15052e-07	Yes	OK	11795.5	10632.2	12958.7	10274.9	10989.5	12632.1	13285.3
ENSG00000109099	PMP22	5376	peripheral myelin protein 22	chr17:15229776-15265357	-	0.339827	0.0564646	6.01841	1.7614e-09	1.21999e-07	Yes	OK	2367.02	2072.14	2661.91	2094.05	2050.23	2671.44	2652.38
ENSG00000151617	EDNRA	1909	endothelin receptor type A	chr4:147480916-147544954	+	0.467855	0.0778196	6.01205	1.83189e-09	1.26244e-07	Yes	OK	1011.24	827.044	1195.43	870.916	783.173	1215.37	1175.48
ENSG00000103978	TMEM87A	25963	transmembrane protein 87A	chr15:42256896-42273584	-	0.293332	0.0490578	5.97931	2.24088e-09	1.53657e-07	Yes	OK	3715.69	3320.85	4110.52	3299.3	3342.41	4141.33	4079.7
ENSG00000152952	PLOD2	5352	procollagen-lysine,2-oxoglutarate 5-dioxygenase 2	chr3:146069440-146161495	-	-0.238093	0.039831	-5.97758	2.26478e-09	1.54523e-07	Yes	OK	20750.7	22511.9	18989.5	22480.1	22543.8	18644.9	19334.2
ENSG00000181751	C5orf30	90355	chromosome 5 open reading frame 30	chr5:103259356-103278660	+	-0.257594	0.043301	-5.94893	2.69904e-09	1.8324e-07	Yes	OK	6363.16	6951.6	5774.73	7051.25	6851.94	5727.62	5821.83
ENSG00000100284	TOM1	10043	target of myb1 membrane trafficking protein	chr22:35299803-35347994	+	0.263599	0.0443254	5.9469	2.73265e-09	1.84608e-07	Yes	OK	5410.45	4899.76	5921.13	4947.57	4851.96	5921.96	5920.29
ENSG00000004660	CAMKK1	84254	calcium/calmodulin dependent protein kinase kinase 1	chr17:3860322-3890743	-	0.397559	0.0668611	5.94603	2.7472e-09	1.84682e-07	Yes	OK	1436.63	1221.94	1651.33	1236.89	1206.98	1639.56	1663.09
ENSG00000076706	MIR6756	102465453	microRNA 6756	chr11:119312949-119313012	-	-0.246161	0.0415376	-5.92622	3.09979e-09	2.07369e-07	Yes	OK	24586.6	26748.3	22425	26332.5	27164.2	21943.7	22906.2
ENSG00000076706	MCAM	4162	melanoma cell adhesion molecule	chr11:119308523-119317130	-	-0.246161	0.0415376	-5.92622	3.09979e-09	2.07369e-07	Yes	OK	24586.6	26748.3	22425	26332.5	27164.2	21943.7	22906.2
ENSG00000121621	KIF18A	81930	kinesin family member 18A	chr11:28020615-28108199	-	-0.604891	0.102401	-5.90706	3.48273e-09	2.31855e-07	Yes	OK	388.074	494.454	281.695	515.945	472.962	267.342	296.048
ENSG00000133055	MYBPH	4608	myosin binding protein H	chr1:203167810-203175814	-	-0.628737	0.106516	-5.90275	3.57491e-09	2.36842e-07	Yes	OK	310.156	401.756	218.556	411.38	392.132	214.071	223.041
ENSG00000237649	KIFC1	3833	kinesin family member C1	chr6:33391535-33409922	+	-0.53631	0.0913259	-5.87249	4.29307e-09	2.83054e-07	Yes	OK	580.771	710.637	450.904	742.961	678.313	457.736	444.072
ENSG00000109846	CRYAB	1410	crystallin alpha B	chr11:111908619-111913213	-	0.320411	0.0546245	5.8657	4.47252e-09	2.93475e-07	Yes	OK	4863.5	4294.26	5432.75	4133.07	4455.45	5170.25	5695.24
ENSG00000171617	ENC1	8507	ectodermal-neural cortex 1	chr5:74627405-74641424	-	-0.608542	0.103778	-5.86389	4.52148e-09	2.95274e-07	Yes	OK	4123.8	5268.02	2979.58	5309.42	5226.61	2687.23	3271.93
ENSG00000126562	WNK4	65266	WNK lysine deficient protein kinase 4	chr17:42780630-42797066	+	-0.601164	0.1026	-5.8593	4.64826e-09	3.02115e-07	Yes	OK	371.536	472.093	270.978	452.656	491.531	267.342	274.615
ENSG00000174705	SH3PXD2B	285590	SH3 and PX domains 2B	chr5:172333498-172454523	-	0.238763	0.0409389	5.83218	5.47094e-09	3.53908e-07	Yes	OK	8660.47	7922.97	9397.96	7997.84	7848.11	9470.41	9325.51
ENSG00000006327	TNFRSF12A	51330	TNF receptor superfamily member 12A	chr16:3020311-3022382	+	0.237164	0.0407476	5.82033	5.87299e-09	3.78132e-07	Yes	OK	10124.6	9267.98	10981.3	9141.17	9394.79	10874.2	11088.4
ENSG00000101447	FAM83D	81610	family with sequence similarity 83 member D	chr20:38926311-38953061	+	-0.610282	0.105116	-5.80579	6.40624e-09	4.10538e-07	Yes	OK	369.136	473.895	264.377	459.535	488.254	238.733	290.02
ENSG00000205730	ITPRIPL2	162073	inositol 1,4,5-trisphosphate receptor interacting protein like 2	chr16:19113931-19121630	+	0.291193	0.0501652	5.80468	6.44881e-09	4.11344e-07	Yes	OK	3910.56	3499.72	4321.41	3513.93	3485.5	4205.45	4437.37
ENSG00000115380	EFEMP1	2202	EGF containing fibulin like extracellular matrix protein 1	chr2:55865961-55924163	-	-0.306328	0.0529332	-5.78707	7.16254e-09	4.54755e-07	Yes	OK	7386.38	8212.65	6560.12	7946.93	8478.36	6193.25	6926.99
ENSG00000135047	CTSL	1514	cathepsin L	chr9:87726058-87731469	+	0.242331	0.0418921	5.78463	7.26703e-09	4.59263e-07	Yes	OK	17107	15623.8	18590.3	15625.6	15621.9	19107.5	18073
ENSG00000177283	FZD8	8325	frizzled class receptor 8	chr10:35638248-35641434	-	0.473479	0.0821126	5.76622	8.10669e-09	5.09978e-07	Yes	OK	1130.1	915.015	1345.18	881.922	948.108	1463.97	1226.39
ENSG00000177283	MIR4683	100616500	microRNA 4683	chr10:35641171-35641252	-	0.473479	0.0821126	5.76622	8.10669e-09	5.09978e-07	Yes	OK	1130.1	915.015	1345.18	881.922	948.108	1463.97	1226.39
ENSG00000150938	CRIM1	51232	cysteine rich transmembrane BMP regulator 1	chr2:36356226-36551135	+	-0.273617	0.0475663	-5.75233	8.80211e-09	5.51197e-07	Yes	OK	9780.78	10746.7	8814.92	10389.1	11104.2	8506.6	9123.23
ENSG00000172331	BPGM	669	bisphosphoglycerate mutase	chr7:134646778-134679815	+	0.325051	0.0565551	5.74752	9.05611e-09	5.64525e-07	Yes	OK	2581.2	2272.31	2890.1	2202.74	2341.87	2857.89	2922.3
ENSG00000101255	TRIB3	57761	tribbles pseudokinase 3	chr20:381342-397559	+	0.444414	0.0773389	5.74632	9.12075e-09	5.65982e-07	Yes	OK	1101.64	908.703	1294.57	873.667	943.739	1359.4	1229.74
ENSG00000107731	UNC5B	219699	unc-5 netrin receptor B	chr10:71212534-71302878	+	0.298784	0.0521526	5.72903	1.01008e-08	6.23973e-07	Yes	OK	3830.15	3411.67	4248.64	3269.03	3554.31	4252.81	4244.47
ENSG00000136114	THSD1	55901	thrombospondin type 1 domain containing 1	chr13:52377167-52406494	-	-0.487356	0.0855221	-5.69859	1.208e-08	7.42893e-07	Yes	OK	685.995	821.557	550.433	828.264	814.849	541.589	559.276
ENSG00000143669	LYST	1130	lysosomal trafficking regulator	chr1:235661030-235866927	-	0.387461	0.0680792	5.69133	1.2605e-08	7.71721e-07	Yes	OK	1489.46	1269.45	1709.46	1236.89	1302.01	1763.86	1655.06
ENSG00000085662	AKR1B1	231	aldo-keto reductase family 1 member B	chr7:134442354-134459136	-	-0.234034	0.0412083	-5.6793	1.35246e-08	8.2434e-07	Yes	OK	10474.8	11349.2	9600.47	11503.5	11194.9	9753.53	9447.41
ENSG00000070882	OSBPL3	26031	oxysterol binding protein like 3	chr7:24796536-24892621	-	-0.346945	0.0611025	-5.67808	1.36217e-08	8.26582e-07	Yes	OK	1836.58	2073.53	1599.63	2065.16	2081.91	1580.37	1618.89
ENSG00000243742	RPLP0P2	113157	ribosomal protein lateral stalk subunit P0 pseudogene 2	chr11:61615035-61639449	+	0.434734	0.076671	5.67012	1.42695e-08	8.62077e-07	Yes	OK	960.152	797.4	1122.9	795.244	799.557	1126.58	1119.22
ENSG00000136492	BRIP1	83990	BRCA1 interacting protein C-terminal helicase 1	chr17:61679185-61863559	-	-0.559262	0.0988192	-5.65945	1.51863e-08	9.13441e-07	Yes	OK	438.529	545.954	331.103	522.825	569.084	320.613	341.594
ENSG00000179134	SAMD4B	55095	sterile alpha motif domain containing 4B	chr19:39342458-39384897	+	0.246367	0.0436481	5.6444	1.65761e-08	9.92682e-07	Yes	OK	6585.95	6003.53	7168.38	5880.4	6126.66	7128.46	7208.3
ENSG00000128510	CPA4	51200	carboxypeptidase A4	chr7:130293133-130324180	+	-0.610785	0.108821	-5.61276	1.9912e-08	1.18727e-06	Yes	OK	290.956	377.379	204.532	392.118	362.641	191.381	217.682
ENSG00000107738	C10orf54	64115	chromosome 10 open reading frame 54	chr10:71747555-71773580	-	-0.462739	0.0829425	-5.57904	2.41854e-08	1.43584e-06	Yes	OK	911.904	1082.49	741.317	1118.57	1046.41	687.591	795.043
ENSG00000083857	FAT1	2195	FAT atypical cadherin 1	chr4:186587782-186723833	-	-0.286364	0.0515286	-5.55738	2.73851e-08	1.61879e-06	Yes	OK	24606	27170.4	22041.6	27105.7	27235.2	20659.3	23424
ENSG00000177410	ZFAS1	441951	ZNFX1 antisense RNA 1	chr20:49278641-49289258	+	0.322176	0.0582026	5.53543	3.10465e-08	1.82735e-06	Yes	OK	2143.15	1888.97	2397.34	1895.93	1882.02	2381.41	2413.26
ENSG00000100522	GNPNAT1	64841	glucosamine-phosphate N-acetyltransferase 1	chr14:52775192-52791668	-	0.266267	0.0482502	5.51847	3.41966e-08	2.00416e-06	Yes	OK	4167.03	3765.99	4568.07	3808.36	3723.62	4640.5	4495.64
ENSG00000167693	NXN	64359	nucleoredoxin	chr17:799312-864111	-	-0.413092	0.0751204	-5.49906	3.81817e-08	2.22819e-06	Yes	OK	1518.53	1763.91	1273.16	1752.84	1774.97	1157.17	1389.15
ENSG00000075702	WDR62	284403	WD repeat domain 62	chr19:36054880-36105110	+	-0.546256	0.0995308	-5.48831	4.05802e-08	2.35812e-06	Yes	OK	456.359	566.781	345.937	613.631	519.93	346.262	345.613
ENSG00000120802	TMPO	7112	thymopoietin	chr12:98515572-98535634	+	-0.320492	0.0584672	-5.48157	4.21565e-08	2.43938e-06	Yes	OK	2174.55	2432.18	1916.93	2487.54	2376.82	1927.62	1906.23
ENSG00000013583	HEBP1	50865	heme binding protein 1	chr12:12974864-13000309	-	0.292582	0.0534921	5.46963	4.50986e-08	2.59866e-06	Yes	OK	2923.54	2610.24	3236.84	2598.99	2621.5	3298.86	3174.81
ENSG00000124762	CDKN1A	1026	cyclin dependent kinase inhibitor 1A	chr6:36678709-36687339	+	-0.242433	0.0443321	-5.46857	4.53687e-08	2.60329e-06	Yes	OK	53961.4	58656.3	49266.5	57982.6	59330	47656.9	50876
ENSG00000106638	TBL2	26608	transducin beta like 2	chr7:73568945-73578683	-	0.303662	0.0556356	5.45806	4.81375e-08	2.75065e-06	Yes	OK	2460.37	2186.07	2734.66	2182.1	2190.04	2753.32	2716.01
ENSG00000065923	SLC9A7	84679	solute carrier family 9 member A7	chrX:46599250-46759172	-	-0.374638	0.068658	-5.45659	4.85374e-08	2.762e-06	Yes	OK	1426.28	1627.36	1225.19	1572.6	1682.13	1256.8	1193.57
ENSG00000171345	KRT19	3880	keratin 19	chr17:41523616-41528389	-	-0.512214	0.0942554	-5.43431	5.50074e-08	3.11724e-06	Yes	OK	742.171	905.573	578.769	912.191	898.955	501.142	656.396
ENSG00000148672	GLUD1	2746	glutamate dehydrogenase 1	chr10:87050201-87095047	-	0.267104	0.0492697	5.42125	5.91822e-08	3.34002e-06	Yes	OK	4321.63	3903.26	4740	3963.84	3842.68	4862.46	4617.54
ENSG00000142871	CYR61	3491	cysteine rich angiogenic inducer 61	chr1:85580760-85583965	+	-0.450824	0.0832595	-5.41468	6.13992e-08	3.45094e-06	Yes	OK	12713.3	15010.4	10416.3	14819.3	15201.4	9719.99	11112.5
ENSG00000112769	LAMA4	3910	laminin subunit alpha 4	chr6:112253781-112254715	-	-0.278806	0.0517222	-5.39045	7.02831e-08	3.93413e-06	Yes	OK	5794.68	6386.22	5203.14	6520.17	6252.27	4937.44	5468.85
ENSG00000168542	MIR3606	100500837	microRNA 3606	chr2:188995629-188995692	+	-0.275131	0.0510932	-5.38488	7.24933e-08	4.04135e-06	Yes	OK	44153	48565.9	39740	46796.9	50334.9	37884.6	41595.4
ENSG00000168542	COL3A1	1281	collagen type III alpha 1 chain	chr2:188974372-189012746	+	-0.275131	0.0510932	-5.38488	7.24933e-08	4.04135e-06	Yes	OK	44153	48565.9	39740	46796.9	50334.9	37884.6	41595.4
ENSG00000096433	ITPR3	3710	inositol 1,4,5-trisphosphate receptor type 3	chr6:33621378-33696571	+	0.268984	0.0499659	5.38335	7.31116e-08	4.05932e-06	Yes	OK	4186.33	3777.3	4595.35	3658.4	3896.2	4532.97	4657.73
ENSG00000156970	BUB1B	701	BUB1 mitotic checkpoint serine/threonine kinase B	chr15:40161008-40221136	+	-0.51212	0.0952572	-5.37619	7.60803e-08	4.20712e-06	Yes	OK	510.8	623.343	398.256	659.034	587.652	392.627	403.884
ENSG00000069869	NEDD4	4734	neural precursor cell expressed, developmentally down-regulated 4, E3 ubiquitin protein ligase	chr15:55826918-55917131	-	-0.30979	0.0576386	-5.3747	7.67113e-08	4.22497e-06	Yes	OK	2184.34	2433.1	1935.57	2406.37	2459.84	1939.46	1931.68
ENSG00000169760	NLGN1	22871	neuroligin 1	chr3:173398447-174283349	+	-0.63074	0.117371	-5.3739	7.705e-08	4.22666e-06	Yes	OK	156.264	214.078	98.4509	211.882	216.274	91.7446	105.157
ENSG00000127947	PTPN12	5782	protein tyrosine phosphatase, non-receptor type 12	chr7:77537455-77640071	+	0.26606	0.0495291	5.3718	7.79533e-08	4.25917e-06	Yes	OK	4369.48	3946.95	4792.01	3963.84	3930.06	4942.37	4641.66
ENSG00000164733	CTSB	1508	cathepsin B	chr8:11842524-11868150	-	0.215134	0.0400725	5.36863	7.9338e-08	4.31763e-06	Yes	OK	70268.8	64881.6	75656	64563.3	65199.9	74825.1	76486.9
ENSG00000071539	TRIP13	9319	thyroid hormone receptor interactor 13	chr5:892853-918049	+	-0.462214	0.0861635	-5.36438	8.12258e-08	4.40289e-06	Yes	OK	692.307	821.814	562.8	788.364	855.264	562.305	563.295
ENSG00000134333	LDHA	3939	lactate dehydrogenase A	chr11:18394388-18408218	+	-0.272784	0.0508852	-5.36076	8.28704e-08	4.47435e-06	Yes	OK	34900.3	38360.9	31439.6	39199.5	37522.4	29706.5	33172.8
ENSG00000152661	GJA1	2697	gap junction protein alpha 1	chr6:121435576-121449744	+	0.230015	0.0430316	5.34527	9.02841e-08	4.85552e-06	Yes	OK	13773.9	12641.3	14906.6	12514.8	12767.8	14452.2	15361
ENSG00000091490	SEL1L3	23231	SEL1L family member 3	chr4:25747426-25863595	-	-0.297822	0.0557543	-5.34169	9.2083e-08	4.93291e-06	Yes	OK	4318.92	4786.67	3851.18	4613.24	4960.09	4046.63	3655.72
ENSG00000188229	TUBB4B	10383	tubulin beta 4B class IVb	chr9:137241258-137243707	+	-0.248742	0.0465927	-5.33864	9.3644e-08	4.99702e-06	Yes	OK	9839.33	10722.4	8956.25	10477.1	10967.7	8615.11	9297.38
ENSG00000136826	KLF4	9314	Kruppel like factor 4	chr9:107484856-107489720	-	0.467608	0.0876768	5.33331	9.64373e-08	5.12613e-06	Yes	OK	644.113	520.669	767.558	515.945	525.392	765.525	769.591
ENSG00000124831	LRRFIP1	9208	LRR binding FLII interacting protein 1	chr2:237692163-237765915	+	0.245075	0.0459739	5.33073	9.78194e-08	5.17952e-06	Yes	OK	5026.86	4582.63	5471.09	4599.48	4565.78	5569.78	5372.4
ENSG00000115756	HPCAL1	3241	hippocalcin like 1	chr2:10302903-10427617	+	0.296001	0.0555775	5.32591	1.00449e-07	5.29832e-06	Yes	OK	2614.53	2331.12	2897.95	2301.8	2360.44	2842.11	2953.78
ENSG00000116667	C1orf21	81563	chromosome 1 open reading frame 21	chr1:184387015-184629021	+	-0.431911	0.0811634	-5.3215	1.02915e-07	5.40757e-06	Yes	OK	858.35	1006.81	709.891	1036.02	977.6	681.672	738.111
ENSG00000108551	RASD1	51655	ras related dexamethasone induced 1	chr17:17494438-17496395	-	0.611705	0.114973	5.32042	1.0353e-07	5.41913e-06	Yes	OK	239.637	161.159	318.115	191.244	131.075	312.721	323.509
ENSG00000117650	NEK2	4751	NIMA related kinase 2	chr1:211666430-211675630	-	-0.615019	0.115857	-5.30844	1.10567e-07	5.76548e-06	Yes	OK	194.332	260.626	128.038	244.902	276.35	115.421	140.656
ENSG00000067057	PFKP	5214	phosphofructokinase, platelet	chr10:3067519-3136805	+	-0.259625	0.0489365	-5.30534	1.12465e-07	5.84223e-06	Yes	OK	15295	16734.4	13855.7	16535	16933.8	13114.5	14596.8
ENSG00000184661	CDCA2	157313	cell division cycle associated 2	chr8:25458930-25507917	+	-0.540586	0.102168	-5.29116	1.21543e-07	6.28707e-06	Yes	OK	373.29	464.306	282.274	451.28	477.331	277.207	287.341
ENSG00000158270	COLEC12	81035	collectin subfamily member 12	chr18:319354-500729	-	-0.500601	0.0946216	-5.29056	1.21945e-07	6.28707e-06	Yes	OK	678.531	825.222	531.84	858.533	791.911	469.574	594.105
ENSG00000167106	FAM102A	399665	family with sequence similarity 102 member A	chr9:127940581-127950714	-	0.316702	0.0599116	5.28616	1.2491e-07	6.41577e-06	Yes	OK	2322.05	2047.36	2596.73	1970.22	2124.51	2657.63	2535.83
ENSG00000151503	NCAPD3	23310	non-SMC condensin II complex subunit D3	chr11:134152441-134224532	-	-0.352148	0.066811	-5.27081	1.35821e-07	6.95019e-06	Yes	OK	1463.12	1656.44	1269.8	1642.77	1670.11	1303.17	1236.44
ENSG00000185697	MYBL1	4603	MYB proto-oncogene like 1	chr8:66562174-66613249	-	-0.468385	0.0888815	-5.26977	1.36593e-07	6.96004e-06	Yes	OK	629.362	751.477	507.247	747.089	755.865	485.358	529.136
ENSG00000119699	TGFB3	7043	transforming growth factor beta 3	chr14:75958060-75983011	-	-0.492968	0.0935567	-5.26919	1.37029e-07	6.96004e-06	Yes	OK	660.978	800.619	521.336	815.881	785.357	464.642	578.03
ENSG00000104889	RNASEH2A	10535	ribonuclease H2 subunit A	chr19:12806613-12813648	+	-0.470138	0.0892901	-5.26528	1.39972e-07	7.08331e-06	Yes	OK	633.446	755.862	511.029	715.444	796.28	511.007	511.051
ENSG00000165757	KIAA1462	57608	KIAA1462	chr10:30012799-30059559	-	0.280074	0.0533762	5.24717	1.54456e-07	7.78756e-06	Yes	OK	2853.68	2561.34	3146.02	2521.94	2600.74	3142.01	3150.03
ENSG00000145386	CCNA2	890	cyclin A2	chr4:121816443-121824001	-	-0.470752	0.0897577	-5.24469	1.56541e-07	7.86375e-06	Yes	OK	646.791	773.627	519.955	755.344	791.911	487.331	552.578
ENSG00000204941	PSG5	5673	pregnancy specific beta-1-glycoprotein 5	chr19:43167742-43186536	-	-0.467725	0.0892338	-5.24156	1.59221e-07	7.96917e-06	Yes	OK	636.67	758.876	514.464	718.196	799.557	519.886	509.042
ENSG00000140937	CDH11	1009	cadherin 11	chr16:64943752-65122137	-	-0.266463	0.0510505	-5.21959	1.79315e-07	8.94228e-06	Yes	OK	7841.43	8604	7078.86	8601.84	8606.16	6666.77	7490.95
ENSG00000239332	LINC01119	100134259	long intergenic non-protein coding RNA 1119	chr2:46827863-46859006	+	0.411024	0.0787979	5.21617	1.82656e-07	9.07591e-06	Yes	OK	888.678	744.781	1032.58	745.713	743.85	1043.72	1021.43
ENSG00000155755	TMEM237	65062	transmembrane protein 237	chr2:201620183-201642944	-	-0.349997	0.0671324	-5.21353	1.85279e-07	9.17297e-06	Yes	OK	1413.45	1600.18	1226.73	1568.47	1631.88	1216.36	1237.11
ENSG00000183876	ARSI	340075	arylsulfatase family member I	chr5:150296338-150302962	-	-0.358213	0.0688849	-5.20016	1.99118e-07	9.82268e-06	Yes	OK	1411.05	1603.41	1218.69	1557.47	1649.36	1180.84	1256.53
ENSG00000167670	CHAF1A	10036	chromatin assembly factor 1 subunit A	chr19:4402662-4443397	+	-0.415598	0.0800427	-5.1922	2.07823e-07	1.02154e-05	Yes	OK	840.268	978.809	701.727	997.494	960.124	695.483	707.97
ENSG00000166825	ANPEP	290	alanyl aminopeptidase, membrane	chr15:89784894-89814840	-	-0.252813	0.0487272	-5.18832	2.12196e-07	1.03619e-05	Yes	OK	30081.4	32831.9	27330.8	34341.3	31322.5	28037.3	26624.2
ENSG00000121152	NCAPH	23397	non-SMC condensin I complex subunit H	chr2:96335740-96377095	+	-0.493517	0.0951227	-5.18822	2.12316e-07	1.03619e-05	Yes	OK	493.844	598.048	389.64	577.859	618.237	382.762	396.517
ENSG00000141458	NPC1	4864	NPC intracellular cholesterol transporter 1	chr18:23531498-23586617	-	0.27677	0.0533674	5.18612	2.14717e-07	1.0442e-05	Yes	OK	6996.1	6285.04	7707.16	6052.38	6517.7	8116.93	7297.38
ENSG00000134291	TMEM106C	79022	transmembrane protein 106C	chr12:47963546-47968878	+	-0.333973	0.064695	-5.16227	2.43968e-07	1.18225e-05	Yes	OK	1726.45	1940.93	1511.97	1880.79	2001.08	1553.74	1470.19
ENSG00000123374	CDK2	1017	cyclin dependent kinase 2	chr12:55966768-55972789	+	-0.387637	0.0751392	-5.15892	2.48383e-07	1.19941e-05	Yes	OK	1004.2	1154.93	853.477	1137.83	1172.03	854.31	852.645
ENSG00000229807	XIST	7503	X inactive specific transcript (non-protein coding)	chrX:73820650-73852753	-	-0.256698	0.0497661	-5.15808	2.49491e-07	1.20053e-05	Yes	OK	5259.68	5745.6	4773.76	5698.79	5792.42	4978.87	4568.65
ENSG00000143228	NUF2	83540	NUF2, NDC80 kinetochore complex component	chr1:163321932-163355763	+	-0.539449	0.105004	-5.13743	2.78519e-07	1.33553e-05	Yes	OK	359.077	449.497	268.657	434.77	464.224	246.625	290.69
ENSG00000183696	UPP1	7378	uridine phosphorylase 1	chr7:48088602-48108733	+	0.372148	0.0725447	5.12992	2.89868e-07	1.3851e-05	Yes	OK	1191.75	1020.4	1363.1	1019.51	1021.29	1408.72	1317.48
ENSG00000164070	HSPA4L	22824	heat shock protein family A (Hsp70) member 4 like	chr4:127781820-127834073	+	-0.46119	0.0899914	-5.12482	2.97822e-07	1.41604e-05	Yes	OK	589.326	701.668	476.984	682.424	720.912	480.426	473.543
ENSG00000119537	KDSR	2531	3-ketodihydrosphingosine reductase	chr18:63327737-63367273	-	0.284893	0.0555981	5.12415	2.98879e-07	1.41604e-05	Yes	OK	2939.2	2630.78	3247.62	2649.89	2611.67	3363.97	3131.28
ENSG00000086062	B4GALT1	2683	beta-1,4-galactosyltransferase 1	chr9:33110640-33167358	-	-0.205876	0.0401804	-5.1238	2.99439e-07	1.41604e-05	Yes	OK	17421.3	18702	16140.7	18680	18724.1	15818.5	16462.8
ENSG00000013297	LOC101928583	101928583	uncharacterized LOC101928583	chr3:170467284-170662123	+	-0.554963	0.108626	-5.10894	3.23965e-07	1.52676e-05	Yes	OK	315.601	401.168	230.033	400.374	401.963	204.206	255.86
ENSG00000013297	CLDN11	5010	claudin 11	chr3:170418864-170434691	+	-0.554963	0.108626	-5.10894	3.23965e-07	1.52676e-05	Yes	OK	315.601	401.168	230.033	400.374	401.963	204.206	255.86
ENSG00000091651	ORC6	23594	origin recognition complex subunit 6	chr16:46689645-46698394	+	-0.508252	0.0996223	-5.10179	3.3645e-07	1.58016e-05	Yes	OK	484.072	591.699	376.446	595.745	587.652	415.317	337.575
ENSG00000144959	NCEH1	57552	neutral cholesterol ester hydrolase 1	chr3:172630644-172711218	-	-0.339542	0.0666008	-5.09816	3.42973e-07	1.6053e-05	Yes	OK	1416.55	1598.4	1234.7	1604.25	1592.56	1224.25	1245.14
ENSG00000161692	DBF4B	80174	DBF4 zinc finger B	chr17:44708607-44752268	+	-0.571564	0.112133	-5.09718	3.44751e-07	1.60813e-05	Yes	OK	244.654	315.392	173.916	320.574	310.211	188.422	159.41
ENSG00000137809	ITGA11	22801	integrin subunit alpha 11	chr15:68301703-68432153	-	0.242069	0.0475468	5.09117	3.55861e-07	1.64988e-05	Yes	OK	10957.6	10002	11913.1	9813.97	10190	11384.2	12442.1
ENSG00000138316	ADAMTS14	140766	ADAM metallopeptidase with thrombospondin type 1 motif 14	chr10:70672505-70762439	+	-0.284884	0.055958	-5.09104	3.56107e-07	1.64988e-05	Yes	OK	5694.57	6292.32	5096.82	6743.06	5841.57	5136.71	5056.93
ENSG00000158158	CNNM4	26504	cyclin and CBS domain divalent metal cation transport mediator 4	chr2:96760901-96811891	+	0.346063	0.0680336	5.08664	3.64456e-07	1.68288e-05	Yes	OK	1909.08	1656.56	2161.59	1638.64	1674.48	2306.44	2016.74
ENSG00000203875	SNHG5	387066	small nucleolar RNA host gene 5	chr6:85677006-85678733	-	0.409717	0.0805831	5.0844	3.6879e-07	1.69718e-05	Yes	OK	857.692	718.546	996.838	740.209	696.882	1015.11	978.566
ENSG00000127946	HIP1	3092	huntingtin interacting protein 1	chr7:75533297-75738972	-	-0.235055	0.0463027	-5.07648	3.84488e-07	1.7635e-05	Yes	OK	5895.33	6396.01	5394.65	6328.93	6463.09	5233.39	5555.92
ENSG00000255112	CHMP1B	57132	charged multivesicular body protein 1B	chr18:11851389-11854449	+	0.230818	0.0454926	5.07374	3.90072e-07	1.77929e-05	Yes	OK	6139.85	5629.25	6650.45	5693.28	5565.22	6820.67	6480.24
ENSG00000130707	ASS1	445	argininosuccinate synthase 1	chr9:130444706-130501274	+	-0.347507	0.0684943	-5.07352	3.90526e-07	1.77929e-05	Yes	OK	1404.16	1589.13	1219.19	1535.45	1642.81	1198.6	1239.78
ENSG00000183098	GPC6	10082	glypican 6	chr13:93226824-94408019	+	0.422186	0.0832434	5.0717	3.94277e-07	1.79043e-05	Yes	OK	776.832	645.835	907.829	649.403	642.267	879.959	935.699
ENSG00000198586	TLK1	9874	tousled like kinase 1	chr2:170990822-171160900	-	0.242662	0.0479112	5.06482	4.08778e-07	1.85016e-05	Yes	OK	4014.49	3663.32	4365.67	3665.27	3661.36	4326.79	4404.55
ENSG00000205978	NYNRIN	57523	NYN domain and retroviral integrase containing	chr14:24398785-24419288	+	-0.483053	0.0953996	-5.06347	4.11692e-07	1.85722e-05	Yes	OK	490.295	592.045	388.544	615.007	569.084	392.627	384.46
ENSG00000079616	KIF22	3835	kinesin family member 22	chr16:29790967-29805385	+	-0.405333	0.0801415	-5.05771	4.24317e-07	1.90789e-05	Yes	OK	903.881	1048.29	759.471	993.367	1103.21	752.7	766.242
ENSG00000187800	PEAR1	375033	platelet endothelial aggregation receptor 1	chr1:156893730-156916434	+	-0.428859	0.0849471	-5.04854	4.45195e-07	1.99523e-05	Yes	OK	713.689	836.707	590.672	826.888	846.525	608.671	572.672
ENSG00000198554	WDHD1	11169	WD repeat and HMG-box DNA binding protein 1	chr14:54938937-55027101	-	-0.391703	0.0778015	-5.03465	4.78718e-07	2.13848e-05	Yes	OK	908.864	1048.6	769.128	1038.77	1058.43	758.619	779.638
ENSG00000137033	IL33	90865	interleukin 33	chr9:6237080-6257983	+	-0.550003	0.109269	-5.03346	4.81713e-07	2.14488e-05	Yes	OK	322.664	410.258	235.069	456.784	363.733	220.976	249.163
ENSG00000137563	GGH	8836	gamma-glutamyl hydrolase	chr8:63015079-63039051	-	-0.374607	0.0744506	-5.03162	4.86347e-07	2.1585e-05	Yes	OK	1043.76	1195.7	891.827	1194.24	1197.15	872.067	911.587
ENSG00000100526	CDKN3	1033	cyclin dependent kinase inhibitor 3	chr14:54396867-54420216	+	-0.576041	0.114559	-5.02834	4.94748e-07	2.1887e-05	Yes	OK	206.121	269.144	143.098	258.661	279.626	152.908	133.289
ENSG00000244509	APOBEC3C	27350	apolipoprotein B mRNA editing enzyme catalytic subunit 3C	chr22:39014259-39018820	+	-0.279324	0.0556139	-5.02257	5.09856e-07	2.24828e-05	Yes	OK	2590.37	2856.44	2324.31	2820.5	2892.39	2274.87	2373.74
ENSG00000179820	MYADM	91663	myeloid associated differentiation marker	chr19:53866157-53876435	+	0.202276	0.0404229	5.00399	5.61543e-07	2.46827e-05	Yes	OK	8729.01	8098.54	9359.49	8063.88	8133.2	9393.46	9325.51
ENSG00000105974	CAV1	857	caveolin 1	chr7:116526292-116561185	+	-0.256917	0.0514751	-4.99109	6.00391e-07	2.6306e-05	Yes	OK	16202	17717.3	14686.7	17111.5	18323.2	13897.8	15475.5
ENSG00000146670	CDCA5	113130	cell division cycle associated 5	chr11:65077454-65084143	-	-0.447421	0.089741	-4.9857	6.17394e-07	2.69648e-05	Yes	OK	697.457	825.889	569.025	854.405	797.372	613.604	524.447
ENSG00000169045	HNRNPH1	3187	heterogeneous nuclear ribonucleoprotein H1 (H)	chr5:179614177-179623721	-	-0.256927	0.0515427	-4.98475	6.20422e-07	2.7011e-05	Yes	OK	7461.37	8158.58	6764.16	8556.44	7760.73	7001.2	6527.12
ENSG00000164099	PRSS12	8492	protease, serine 12	chr4:118280037-118352767	-	-0.505706	0.101781	-4.96855	6.74544e-07	2.92023e-05	Yes	OK	387.512	475.937	299.086	458.159	493.715	288.058	310.114
ENSG00000176225	RTTN	25914	rotatin	chr18:70003805-70205726	-	-0.392478	0.0789945	-4.96842	6.75013e-07	2.92023e-05	Yes	OK	881.52	1017.16	745.88	993.367	1040.95	755.66	736.101
ENSG00000159388	BTG2	7832	BTG anti-proliferation factor 2	chr1:203305535-203309601	+	-0.403881	0.0813542	-4.96447	6.88892e-07	2.9709e-05	Yes	OK	896.061	1041.65	750.476	1077.29	1006	711.267	789.685
ENSG00000204262	COL5A2	1290	collagen type V alpha 2 chain	chr2:189031914-189179879	-	-0.24146	0.0487161	-4.95647	7.17847e-07	3.08607e-05	Yes	OK	15589.8	16953	14226.7	16462.1	17443.9	13575.2	14878.1
ENSG00000095209	TMEM38B	55151	transmembrane protein 38B	chr9:105694524-105776611	+	0.328038	0.0662369	4.95249	7.32696e-07	3.13279e-05	Yes	OK	1465.76	1284.79	1646.73	1285.05	1284.53	1629.7	1663.76
ENSG00000164087	POC1A	25886	POC1 centriolar protein A	chr3:52075232-52154690	-	-0.515905	0.104174	-4.95233	7.33283e-07	3.13279e-05	Yes	OK	347.439	429.489	265.389	415.508	443.47	274.247	256.53
ENSG00000075426	FOSL2	2355	FOS like 2, AP-1 transcription factor subunit	chr2:28392911-28414649	+	-0.271872	0.0549507	-4.94756	7.51505e-07	3.1922e-05	Yes	OK	6109.8	6722.57	5497.02	6858.63	6586.51	5136.71	5857.33
ENSG00000149256	TENM4	26011	teneurin transmembrane protein 4	chr11:78653282-79440651	-	-0.459095	0.0927994	-4.94718	7.52966e-07	3.1922e-05	Yes	OK	831.819	994.663	668.975	965.849	1023.48	579.076	758.874
ENSG00000100504	PYGL	5836	phosphorylase, glycogen, liver	chr14:50905216-50944530	-	-0.398605	0.0805772	-4.94687	7.54173e-07	3.1922e-05	Yes	OK	1032.56	1197.09	868.034	1165.35	1228.83	801.039	935.029
ENSG00000197555	SIPA1L1	26037	signal induced proliferation associated 1 like 1	chr14:71529311-71741229	+	-0.22211	0.0449213	-4.94444	7.63638e-07	3.2154e-05	Yes	OK	6212.81	6710.23	5715.39	6664.64	6755.82	5570.77	5860.01
ENSG00000112715	VEGFA	7422	vascular endothelial growth factor A	chr6:43770208-43786486	+	0.234762	0.0474816	4.94426	7.64343e-07	3.2154e-05	Yes	OK	8085.91	7402.54	8769.27	7722.67	7082.41	8916.98	8621.56
ENSG00000167553	TUBA1C	84790	tubulin alpha 1c	chr12:49227925-49273338	+	-0.211883	0.0428755	-4.94182	7.73957e-07	3.23835e-05	Yes	OK	8301.41	8929.33	7673.49	8700.9	9157.77	7681.88	7665.1
ENSG00000183023	SLC8A1	6546	solute carrier family 8 member A1	chr2:40112145-40512435	-	-0.527156	0.106675	-4.94168	7.74522e-07	3.23835e-05	Yes	OK	333.193	415.972	250.415	379.736	452.208	245.639	255.191
ENSG00000142731	PLK4	10733	polo like kinase 4	chr4:127880860-127899222	+	-0.480219	0.0973045	-4.93523	8.00579e-07	3.33713e-05	Yes	OK	449.499	543.244	355.753	528.328	558.161	353.167	358.339
ENSG00000163507	KIAA1524	57650	KIAA1524	chr3:108549870-108589644	-	-0.435276	0.088441	-4.92165	8.58176e-07	3.56637e-05	Yes	OK	626.561	739.462	513.659	747.089	731.835	498.183	529.136
ENSG00000101871	MID1	4281	midline 1	chrX:10445309-10677739	-	-0.344385	0.0699969	-4.92	8.6543e-07	3.58565e-05	Yes	OK	1419.94	1608.42	1231.45	1653.78	1563.07	1176.9	1286
ENSG00000103035	PSMD7	5713	proteasome 26S subunit, non-ATPase 7	chr16:74296774-74306288	+	0.22975	0.0470483	4.88328	1.04333e-06	4.30972e-05	Yes	OK	4221.2	3871.71	4570.68	3890.92	3852.51	4575.39	4565.97
ENSG00000111252	SH2B3	10019	SH2B adaptor protein 3	chr12:111405947-111451623	+	0.271499	0.0556689	4.87702	1.077e-06	4.43544e-05	Yes	OK	3739.34	3363.45	4115.23	3262.15	3464.75	4302.13	3928.33
ENSG00000084636	COL16A1	1307	collagen type XVI alpha 1 chain	chr1:31652246-31704167	-	-0.21326	0.0437809	-4.87107	1.10993e-06	4.55738e-05	Yes	OK	7180.18	7729.22	6631.14	7887.77	7570.67	6735.83	6526.45
ENSG00000079257	LXN	56925	latexin	chr3:158666413-158672693	-	-0.438557	0.09013	-4.86583	1.1398e-06	4.66604e-05	Yes	OK	582.744	688.539	476.948	676.92	700.158	484.372	469.524
ENSG00000124343	XG	7499	Xg blood group	chrX:2752051-2816501	+	-0.522806	0.107557	-4.86075	1.16941e-06	4.77299e-05	Yes	OK	294.336	367.686	220.986	356.346	379.025	222.949	219.022
ENSG00000124343	XGY2	100132596	Xg pseudogene, Y-linked 2	chrX:2752295-2774996	+	-0.522806	0.107557	-4.86075	1.16941e-06	4.77299e-05	Yes	OK	294.336	367.686	220.986	356.346	379.025	222.949	219.022
ENSG00000089685	BIRC5	332	baculoviral IAP repeat containing 5	chr17:78214195-78225635	+	-0.550872	0.113418	-4.85702	1.19166e-06	4.84939e-05	Yes	OK	215.79	277.661	153.919	272.419	282.903	159.813	148.024
ENSG00000171490	RSL1D1	26156	ribosomal L1 domain containing 1	chr16:11834195-11851585	-	0.22247	0.0458146	4.85587	1.19859e-06	4.86315e-05	Yes	OK	4725.04	4345.89	5104.19	4316.05	4375.72	5136.71	5071.66
ENSG00000174442	ZWILCH	55055	zwilch kinetochore protein	chr15:66505082-66549484	+	-0.368314	0.0759049	-4.85231	1.22033e-06	4.93677e-05	Yes	OK	1178.92	1346.35	1011.48	1352.46	1340.24	1079.23	943.737
ENSG00000051341	POLQ	10721	DNA polymerase theta	chr3:121431425-121546006	-	-0.510181	0.105228	-4.84835	1.24491e-06	5.02139e-05	Yes	OK	337.235	416.765	257.704	408.629	424.901	272.274	243.134
ENSG00000104763	ASAH1	427	N-acylsphingosine amidohydrolase 1	chr8:18056298-18084370	-	0.240328	0.0496162	4.84374	1.27419e-06	5.12439e-05	Yes	OK	4210.44	3842.83	4578.05	3727.19	3958.46	4521.13	4634.96
ENSG00000076513	ANKRD13A	88455	ankyrin repeat domain 13A	chr12:109999429-110039430	+	-0.258165	0.0533129	-4.84245	1.28248e-06	5.14266e-05	Yes	OK	4201.44	4597.96	3804.93	4430.25	4765.67	3668.8	3941.05
ENSG00000068745	IP6K2	51447	inositol hexakisphosphate kinase 2	chr3:48693450-48717278	-	-0.284111	0.0590504	-4.81132	1.49934e-06	5.99474e-05	Yes	OK	2097.8	2317.43	1878.17	2327.94	2306.92	1917.76	1838.58
ENSG00000132429	POPDC3	64208	popeye domain containing 3	chr6:105157899-105179983	-	0.292206	0.0608306	4.80361	1.55831e-06	6.20916e-05	Yes	OK	1967.65	1753.29	2182.02	1761.09	1745.48	2233.44	2130.61
ENSG00000196569	LAMA2	3908	laminin subunit alpha 2	chr6:128883140-129516565	+	-0.473436	0.0985682	-4.80313	1.56202e-06	6.20916e-05	Yes	OK	466.923	564.607	369.24	544.838	584.376	343.302	395.177
ENSG00000148841	ITPRIP	85450	inositol 1,4,5-trisphosphate receptor interacting protein	chr10:104309695-104338493	-	0.274966	0.0573197	4.79705	1.61019e-06	6.38211e-05	Yes	OK	3475.35	3120.12	3830.58	3042.01	3198.23	4028.87	3632.28
ENSG00000168874	ATOH8	84913	atonal bHLH transcription factor 8	chr2:85753785-85791383	+	-0.333575	0.0698055	-4.77863	1.7649e-06	6.97517e-05	Yes	OK	1444.6	1630.29	1258.9	1659.28	1601.3	1195.64	1322.17
ENSG00000173511	VEGFB	7423	vascular endothelial growth factor B	chr11:64234583-64239264	+	0.298521	0.0626644	4.7638	1.89977e-06	7.48662e-05	Yes	OK	1849.68	1644.94	2054.42	1668.91	1620.96	1997.66	2111.18
ENSG00000143390	RFX5	5993	regulatory factor X5	chr1:151340639-151347293	-	-0.340831	0.0716926	-4.75405	1.99378e-06	7.8346e-05	Yes	OK	1233.81	1395.32	1072.31	1446.02	1344.61	1093.04	1051.57
ENSG00000113328	CCNG1	900	cyclin G1	chr5:163437570-163445016	+	-0.226289	0.0476232	-4.75167	2.01747e-06	7.90501e-05	Yes	OK	4106.81	4443.45	3770.17	4478.4	4408.49	3733.91	3806.43
ENSG00000103855	CD276	80381	CD276 molecule	chr15:73684730-73714518	+	0.190188	0.0400525	4.74848	2.04952e-06	8.00773e-05	Yes	OK	13890	12948.8	14831.2	12838.1	13059.4	14604.2	15058.3
ENSG00000135437	RDH5	5959	retinol dehydrogenase 5	chr12:55720366-55724742	+	-0.499247	0.105246	-4.74364	2.0991e-06	8.17813e-05	Yes	OK	340.854	419.863	261.845	433.394	406.332	277.207	246.483
ENSG00000077092	RARB	5915	retinoic acid receptor beta	chr3:25428262-25597931	+	-0.540448	0.11395	-4.74284	2.10741e-06	8.18725e-05	Yes	OK	214.967	277.015	152.919	282.05	271.98	141.07	164.769
ENSG00000109814	UGDH	7358	UDP-glucose 6-dehydrogenase	chr4:39498754-39527598	-	0.207977	0.0439115	4.73627	2.17689e-06	8.43331e-05	Yes	OK	12183.7	11271.1	13096.2	10905	11637.3	13303	12889.5
ENSG00000122863	CHST3	9469	carbohydrate sulfotransferase 3	chr10:71964361-72013564	+	0.209699	0.0443095	4.73259	2.21675e-06	8.55096e-05	Yes	OK	7795.52	7210.3	8380.75	7150.31	7270.29	8140.6	8620.89
ENSG00000166803	KIAA0101	9768	KIAA0101	chr15:64365011-64381510	-	-0.50592	0.106908	-4.73232	2.21973e-06	8.55096e-05	Yes	OK	339.876	420.976	258.776	438.897	403.055	283.126	234.427
ENSG00000014138	POLA2	23649	DNA polymerase alpha 2, accessory subunit	chr11:65261851-65298685	+	-0.364608	0.0770794	-4.7303	2.24191e-06	8.61219e-05	Yes	OK	1004.16	1146.56	861.766	1162.6	1130.52	899.689	823.844
ENSG00000155363	MOV10	4343	Mov10 RISC complex RNA helicase	chr1:112674311-112700746	+	-0.328594	0.0695883	-4.72198	2.3356e-06	8.94705e-05	Yes	OK	1472.63	1658.36	1286.9	1751.46	1565.25	1282.45	1291.36
ENSG00000123485	HJURP	55355	Holliday junction recognition protein	chr2:233836700-233854566	-	-0.478266	0.101306	-4.721	2.34687e-06	8.96517e-05	Yes	OK	390.761	474.178	307.344	462.287	486.069	318.64	296.048
ENSG00000114853	ZBTB47	92999	zinc finger and BTB domain containing 47	chr3:42653683-42667580	+	0.254599	0.0540044	4.71441	2.42415e-06	9.23468e-05	Yes	OK	2830.2	2566.38	3094.03	2517.81	2614.94	3060.13	3127.93
ENSG00000169756	LIMS1	3987	LIM zinc finger domain containing 1	chr2:108588465-108687246	+	0.244706	0.0519503	4.71039	2.4724e-06	9.39237e-05	Yes	OK	3142.51	2863.21	3421.8	2912.68	2813.74	3433.02	3410.58
ENSG00000110841	PPFIBP1	8496	PPFIA binding protein 1	chr12:27524111-27695564	+	0.189883	0.0403336	4.70781	2.50391e-06	9.48582e-05	Yes	OK	10198.1	9505.61	10890.5	9406.71	9604.51	10986.7	10794.4
ENSG00000119630	PGF	5228	placental growth factor	chr14:74941829-74955764	-	-0.247217	0.0525671	-4.70287	2.56526e-06	9.69146e-05	Yes	OK	3344.32	3643.7	3044.93	3533.19	3754.2	3081.83	3008.03
ENSG00000128805	ARHGAP22	58504	Rho GTPase activating protein 22	chr10:48446024-48493649	-	0.229428	0.048796	4.70179	2.57889e-06	9.71619e-05	Yes	OK	4579.06	4201.12	4956.99	4342.2	4060.05	4937.44	4976.55
ENSG00000087074	PPP1R15A	23645	protein phosphatase 1 regulatory subunit 15A	chr19:48872391-48876062	+	0.272819	0.0581274	4.69347	2.68607e-06	0.000100923	Yes	OK	2458.57	2209.87	2707.28	2227.51	2192.23	2799.69	2614.87
ENSG00000111145	ELK3	2004	ELK3, ETS transcription factor	chr12:96194381-96269835	+	0.197394	0.0421428	4.68392	2.8144e-06	0.000105456	Yes	OK	7352.04	6831.34	7872.74	6737.56	6925.12	7919.63	7825.85
ENSG00000080824	HSP90AA1	3320	heat shock protein 90 alpha family class A member 1	chr14:102080737-102139749	-	0.181811	0.0388368	4.68141	2.84915e-06	0.000106466	Yes	OK	50536	47265.5	53806.5	47284	47247	53992.2	53620.9
ENSG00000116729	WLS	79971	wntless Wnt ligand secretion mediator	chr1:68098458-68232546	-	0.212686	0.0455279	4.67154	2.98943e-06	0.000111405	Yes	OK	4884.59	4511.94	5257.23	4538.94	4484.95	5209.71	5304.75
ENSG00000179750	APOBEC3B	9582	apolipoprotein B mRNA editing enzyme catalytic subunit 3B	chr22:38982398-38992779	+	-0.551661	0.118404	-4.65916	3.17499e-06	0.000117999	Yes	OK	128.002	173.799	82.2047	176.109	171.49	73.9876	90.4219
ENSG00000074181	NOTCH3	4854	notch 3	chr19:15159632-15200981	-	0.208087	0.0447338	4.65167	3.29259e-06	0.000122039	Yes	OK	12705.7	11758.6	13652.7	11745.7	11771.6	13129.3	14176.1
ENSG00000052841	TTC17	55761	tetratricopeptide repeat domain 17	chr11:43358884-43494933	+	0.21321	0.0458874	4.64638	3.37804e-06	0.000124869	Yes	OK	4690.25	4331.19	5049.31	4364.21	4298.16	5022.28	5076.35
ENSG00000225648	SBDSP1	155370	Shwachman-Bodian-Diamond syndrome pseudogene 1	chr7:72829372-72834006	+	0.337078	0.0726435	4.64017	3.48124e-06	0.000128338	Yes	OK	1138.86	991.291	1286.42	1012.63	969.954	1298.24	1274.61
ENSG00000133961	LOC101928143	101928143	uncharacterized LOC101928143	chr14:73460934-73463642	-	0.231205	0.0498441	4.63857	3.50832e-06	0.00012899	Yes	OK	5347.66	4896.15	5799.17	4822.37	4969.92	6036.4	5561.95
ENSG00000133961	NUMB	8650	NUMB, endocytic adaptor protein	chr14:73275209-73458580	-	0.231205	0.0498441	4.63857	3.50832e-06	0.00012899	Yes	OK	5347.66	4896.15	5799.17	4822.37	4969.92	6036.4	5561.95
ENSG00000164104	HMGB2	3148	high mobility group box 2	chr4:173331375-173334358	-	-0.36675	0.0791524	-4.63346	3.59604e-06	0.000131861	Yes	OK	912.413	1044.23	780.6	1001.62	1086.83	767.498	793.703
ENSG00000147536	GINS4	84296	GINS complex subunit 4	chr8:41529205-41545046	+	-0.457806	0.0989522	-4.62654	3.71828e-06	0.000135501	Yes	OK	436.441	523.883	349	499.435	548.33	359.086	338.915
ENSG00000143819	EPHX1	2052	epoxide hydrolase 1	chr1:225810133-225845561	+	0.212399	0.0459132	4.62609	3.72633e-06	0.000135501	Yes	OK	5534.15	5113.35	5954.96	5244.76	4981.94	5903.22	6006.69
ENSG00000100629	CEP128	145508	centrosomal protein 128	chr14:80496477-80939540	-	-0.521076	0.112639	-4.62607	3.72675e-06	0.000135501	Yes	OK	237.855	302.526	173.184	312.319	292.734	158.827	187.542
ENSG00000178999	AURKB	9212	aurora kinase B	chr17:8204730-8210626	-	-0.50406	0.108971	-4.62562	3.73484e-06	0.000135501	Yes	OK	280.904	350.492	211.315	359.098	341.887	200.26	222.371
ENSG00000141753	IGFBP4	3487	insulin like growth factor binding protein 4	chr17:40443423-40457730	+	-0.234702	0.0508132	-4.61892	3.85751e-06	0.000139583	Yes	OK	23179	25160	21198.1	25758.7	24561.3	20017.1	22379.1
ENSG00000147010	SH3KBP1	30011	SH3 domain containing kinase binding protein 1	chrX:19533964-19799799	-	0.200687	0.0435739	4.60568	4.11129e-06	0.000148374	Yes	OK	6491.04	6022.28	6959.8	5998.72	6045.83	7085.05	6834.56
ENSG00000143797	MBOAT2	129642	membrane bound O-acyltransferase domain containing 2	chr2:8852689-9003750	-	-0.228226	0.049736	-4.58874	4.45928e-06	0.000160511	Yes	OK	3457.24	3743.61	3170.87	3739.57	3747.65	3152.86	3188.88
ENSG00000187210	GCNT1	2650	glucosaminyl (N-acetyl) transferase 1, core 2	chr9:76459151-76507416	+	-0.297142	0.064842	-4.58255	4.59341e-06	0.000164906	Yes	OK	3032.72	3374.32	2691.12	3357.08	3391.56	2463.29	2918.95
ENSG00000138758	SEPT11	55752	septin 11	chr4:76949713-77038615	+	-0.18756	0.040989	-4.57587	4.74249e-06	0.000169614	Yes	OK	11690	12470.3	10909.7	12254.7	12685.9	11051.8	10767.6
ENSG00000112186	CAP2	10486	CAP, adenylate cyclase-associated protein, 2 (yeast)	chr6:17393504-17557792	+	-0.431029	0.0942023	-4.57557	4.74928e-06	0.000169614	Yes	OK	547.587	649.07	446.104	638.396	659.744	415.317	476.892
ENSG00000163297	ANTXR2	118429	anthrax toxin receptor 2	chr4:79901616-80073323	-	0.203746	0.0445713	4.57124	4.84844e-06	0.000172705	Yes	OK	6153.04	5700.65	6605.44	5654.76	5746.54	6744.71	6466.17
ENSG00000127948	POR	5447	cytochrome p450 oxidoreductase	chr7:75915101-75986855	+	0.246996	0.0540601	4.56892	4.90251e-06	0.000174125	Yes	OK	2763.85	2515.29	3012.41	2546.71	2483.87	2977.26	3047.55
ENSG00000127948	MIR4651	100616270	microRNA 4651	chr7:75915196-75915269	+	0.246996	0.0540601	4.56892	4.90251e-06	0.000174125	Yes	OK	2763.85	2515.29	3012.41	2546.71	2483.87	2977.26	3047.55
ENSG00000177189	RPS6KA3	6197	ribosomal protein S6 kinase A3	chrX:20149910-20266632	-	0.258811	0.056652	4.56844	4.91368e-06	0.000174125	Yes	OK	2345.58	2121.46	2569.71	2100.93	2141.98	2591.54	2547.89
ENSG00000038427	VCAN	1462	versican	chr5:83471673-83582303	+	-0.452832	0.0991476	-4.56725	4.94159e-06	0.000174662	Yes	OK	20506.6	24611.6	16401.6	24554.9	24668.3	14940.6	17862.7
ENSG00000186340	THBS2	7058	thrombospondin 2	chr6:169215779-169254114	-	0.220221	0.0482748	4.56183	5.07106e-06	0.000178778	Yes	OK	12903.6	11879.2	13927.9	11844.7	11913.6	13212.2	14643.7
ENSG00000140931	CMTM3	123920	CKLF like MARVEL transmembrane domain containing 3	chr16:66604663-66613893	+	0.278305	0.0610218	4.56075	5.09723e-06	0.000179239	Yes	OK	1974.66	1770.4	2178.93	1736.33	1804.46	2132.81	2225.05
ENSG00000196562	SULF2	55959	sulfatase 2	chr20:47657405-47786064	-	-0.410213	0.0900318	-4.55632	5.20585e-06	0.000182591	Yes	OK	681.934	798.75	565.119	755.344	842.156	528.764	601.473
ENSG00000105486	LIG1	3978	DNA ligase 1	chr19:48115444-48170603	-	-0.411612	0.0903902	-4.55372	5.27053e-06	0.000184259	Yes	OK	634.994	744.424	525.565	795.244	693.605	532.71	518.419
ENSG00000175137	SH3BP5L	80851	SH3 binding domain protein 5 like	chr1:248810451-248825955	-	-0.233463	0.051273	-4.55333	5.28029e-06	0.000184259	Yes	OK	3697.63	4012.91	3382.34	3967.96	4057.86	3281.1	3483.59
ENSG00000111052	LIN7A	8825	lin-7 homolog A, crumbs cell polarity complex component	chr12:80792520-80937915	-	-0.379687	0.0834011	-4.55255	5.29999e-06	0.000184477	Yes	OK	907.619	1047.63	767.61	1034.64	1060.61	705.348	829.872
ENSG00000130720	FIBCD1	84929	fibrinogen C domain containing 1	chr9:130902437-130939068	-	-0.385749	0.0847448	-4.55189	5.31662e-06	0.000184588	Yes	OK	735.614	851.274	619.953	851.654	850.895	592.887	647.019
ENSG00000138311	ZNF365	22891	zinc finger protein 365	chr10:62374156-62402458	+	0.300872	0.0662013	4.54481	5.49858e-06	0.000190423	Yes	OK	1608.59	1424.87	1792.31	1425.38	1424.35	1858.57	1726.05
ENSG00000148700	ADD3	120	adducin 3	chr10:110005803-110135565	+	-0.344281	0.0757634	-4.54416	5.51546e-06	0.000190526	Yes	OK	1213.46	1376.79	1050.13	1313.94	1439.64	992.42	1107.84
ENSG00000163535	SGO2	151246	shugoshin 2	chr2:200526141-200584095	+	-0.416712	0.091769	-4.54088	5.602e-06	0.00019303	Yes	OK	544.026	639.402	448.651	645.276	633.529	447.871	449.43
ENSG00000120549	KIAA1217	56243	KIAA1217	chr10:24449432-24547843	+	0.258743	0.0573506	4.5116	6.43419e-06	0.000221149	Yes	OK	2530.22	2286.87	2773.56	2227.51	2346.24	2839.15	2707.97
ENSG00000143612	C1orf43	25912	chromosome 1 open reading frame 43	chr1:154206700-154220797	-	0.209846	0.0465935	4.50375	6.67642e-06	0.000228901	Yes	OK	5209.92	4814.41	5605.42	4834.75	4794.06	5747.35	5463.49
ENSG00000177508	IRX3	79191	iroquois homeobox 3	chr16:54283299-54286466	-	0.365221	0.0812023	4.49766	6.87045e-06	0.000234966	Yes	OK	1205.55	1032.12	1378.99	1048.4	1015.83	1246.94	1511.05
ENSG00000168209	DDIT4	54541	DNA damage inducible transcript 4	chr10:72273918-72276039	+	0.396926	0.0883738	4.49144	7.07431e-06	0.000241336	Yes	OK	932.004	779.021	1084.99	701.686	856.356	1007.22	1162.76
ENSG00000156802	ATAD2	29028	ATPase family, AAA domain containing 2	chr8:123319850-123396465	-	-0.309814	0.0690203	-4.48874	7.1646e-06	0.00024381	Yes	OK	1386.43	1551.41	1221.45	1598.74	1504.08	1189.72	1253.18
ENSG00000134690	CDCA8	55143	cell division cycle associated 8	chr1:37692400-37709719	+	-0.473284	0.105626	-4.48074	7.43861e-06	0.000252508	Yes	OK	347.958	424.82	271.095	444.401	405.24	291.018	251.172
ENSG00000140416	TPM1	7168	tropomyosin 1 (alpha)	chr15:63042638-63066093	+	-0.450368	0.100572	-4.47808	7.53167e-06	0.000255035	Yes	OK	21134.3	25393	16875.6	25491.8	25294.2	15333.2	18417.9
ENSG00000162849	KIF26B	55083	kinesin family member 26B	chr1:245154984-245703126	+	-0.466897	0.10434	-4.47475	7.65023e-06	0.000258412	Yes	OK	387.471	472.361	302.58	487.052	457.67	272.274	332.887
ENSG00000120708	TGFBI	7045	transforming growth factor beta induced	chr5:136028894-136063818	+	-0.245767	0.0549426	-4.47317	7.70698e-06	0.000259689	Yes	OK	212279	231404	193155	225923	236884	182341	203969
ENSG00000131724	IL13RA1	3597	interleukin 13 receptor subunit alpha 1	chrX:118727595-118794533	+	-0.192279	0.043002	-4.47139	7.77133e-06	0.000261216	Yes	OK	6297.11	6730.63	5863.58	6788.46	6672.8	5916.05	5811.11
ENSG00000237187	NR2F1-AS1	441094	NR2F1 antisense RNA 1	chr5:93409355-93581320	-	0.323833	0.072441	4.47031	7.81076e-06	0.000261899	Yes	OK	1169.85	1023.29	1316.42	989.239	1057.34	1314.02	1318.82
ENSG00000104738	MCM4	4173	minichromosome maintenance complex component 4	chr8:47960202-47978159	+	-0.276319	0.0619481	-4.46049	8.17719e-06	0.000273517	Yes	OK	2209.11	2436.63	1981.6	2329.32	2543.95	1923.68	2039.52
ENSG00000100422	CERK	64781	ceramide kinase	chr22:46684409-46738255	-	0.201437	0.0452524	4.45141	8.53071e-06	0.000284648	Yes	OK	4933.53	4576.15	5290.92	4547.2	4605.1	5261.01	5320.83
ENSG00000136450	SRSF1	6426	serine and arginine rich splicing factor 1	chr17:58000918-58007346	-	-0.192014	0.0431413	-4.45082	8.5542e-06	0.000284739	Yes	OK	5852.09	6254.99	5449.18	6264.26	6245.72	5439.57	5458.8
ENSG00000182054	IDH2	3418	isocitrate dehydrogenase (NADP(+)) 2, mitochondrial	chr15:90083979-90102554	-	-0.342274	0.0769253	-4.44943	8.60973e-06	0.000285893	Yes	OK	1168.75	1326.44	1011.06	1286.42	1366.46	943.095	1079.03
ENSG00000221852	KRTAP1-5	83895	keratin associated protein 1-5	chr17:41026025-41027202	-	-0.485671	0.109255	-4.44529	8.77737e-06	0.000290756	Yes	OK	329.693	408.893	250.493	385.239	432.547	219.003	281.982
ENSG00000029993	HMGB3	3149	high mobility group box 3	chrX:150983384-150990775	+	-0.375908	0.0845903	-4.44386	8.83587e-06	0.000291789	Yes	OK	710.391	817.933	602.85	809.002	826.864	613.604	592.096
ENSG00000145592	RPL37	6167	ribosomal protein L37	chr5:40831327-40835285	-	0.175859	0.0395767	4.44349	8.85112e-06	0.000291789	Yes	OK	10857.2	10176	11538.3	10093.3	10258.8	11538.1	11538.5
ENSG00000135956	TMEM127	55654	transmembrane protein 127	chr2:96250207-96266013	-	0.201711	0.0454439	4.43867	9.05149e-06	0.000297679	Yes	OK	5748.69	5329.82	6167.56	5188.35	5471.28	6163.66	6171.46
ENSG00000101224	CDC25B	994	cell division cycle 25B	chr20:3800061-3806121	+	-0.300157	0.067663	-4.43606	9.16214e-06	0.000300149	Yes	OK	1358.44	1512.91	1203.98	1527.2	1498.62	1214.38	1193.57
ENSG00000106105	GARS	2617	glycyl-tRNA synthetase	chr7:30594734-30634032	+	0.191527	0.0431769	4.43586	9.17036e-06	0.000300149	Yes	OK	10325.9	9614.49	11037.3	9313.16	9915.82	11081.4	10993.3
ENSG00000113716	HMGXB3	22993	HMG-box containing 3	chr5:150000605-150053143	+	0.216117	0.048739	4.43417	9.24264e-06	0.000301404	Yes	OK	4300.9	3963.18	4638.62	3851.02	4075.34	4616.82	4660.41
ENSG00000204387	C6orf48	50854	chromosome 6 open reading frame 48	chr6:31834914-31839766	+	0.234333	0.0528498	4.43394	9.25267e-06	0.000301404	Yes	OK	2999.79	2742.76	3256.82	2761.34	2724.17	3310.7	3202.94
ENSG00000164904	ALDH7A1	501	aldehyde dehydrogenase 7 family member A1	chr5:126541840-126595390	-	-0.373922	0.0843748	-4.43168	9.35033e-06	0.000303863	Yes	OK	728.434	838.004	618.865	844.774	831.233	638.266	599.464
ENSG00000184445	KNTC1	9735	kinetochore associated 1	chr12:122527261-122626400	+	-0.361181	0.0815537	-4.42875	9.478e-06	0.000307284	Yes	OK	833.88	953.088	714.673	912.191	993.985	726.065	703.281
ENSG00000154839	SKA1	220134	spindle and kinetochore associated complex subunit 1	chr18:50375021-50394168	+	-0.465336	0.105085	-4.4282	9.50236e-06	0.000307347	Yes	OK	384.022	466.186	301.858	443.025	489.346	332.451	271.266
ENSG00000127586	CHTF18	63922	chromosome transmission fidelity factor 18	chr16:788621-798074	+	-0.439968	0.0993858	-4.42687	9.56111e-06	0.00030852	Yes	OK	434.664	518.605	350.724	511.818	525.392	371.911	329.538
ENSG00000173110	HSPA6	3310	heat shock protein family A (Hsp70) member 6	chr1:161524539-161526897	+	0.488714	0.110502	4.42268	9.74835e-06	0.000313824	Yes	OK	77.4385	38.2143	116.663	31.6446	44.7839	77.9336	155.392
ENSG00000143641	GALNT2	2590	polypeptide N-acetylgalactosaminyltransferase 2	chr1:230067194-230282130	+	-0.185191	0.0418871	-4.4212	9.81537e-06	0.000315241	Yes	OK	13650	14556.6	12743.4	14560.7	14552.6	12394.4	13092.4
ENSG00000106992	AK1	203	adenylate kinase 1	chr9:127866479-127879621	-	-0.219431	0.049701	-4.41502	1.00999e-05	0.000323621	Yes	OK	3983.5	4299.48	3667.52	4178.47	4420.5	3643.15	3691.89
ENSG00000138835	RGS3	5998	regulator of G-protein signaling 3	chr9:113463699-113597743	+	0.247226	0.05602	4.41318	1.01865e-05	0.000325635	Yes	OK	3554.43	3228.95	3879.91	3043.39	3414.5	3889.77	3870.06
ENSG00000106089	STX1A	6804	syntaxin 1A	chr7:73699204-73719687	-	0.316797	0.0718771	4.40748	1.04578e-05	0.000333532	Yes	OK	1766.97	1550.03	1983.91	1558.84	1541.22	2144.65	1823.17
ENSG00000198682	PAPSS2	9060	3'-phosphoadenosine 5'-phosphosulfate synthase 2	chr10:87659718-87747705	+	-0.195176	0.0442904	-4.40674	1.04939e-05	0.000333906	Yes	OK	6783	7256.79	6309.2	7060.88	7452.7	6292.89	6325.51
ENSG00000159399	HK2	3099	hexokinase 2	chr2:74832654-74893354	+	0.239826	0.054437	4.40557	1.05507e-05	0.000334936	Yes	OK	2674.54	2440.48	2908.61	2477.91	2403.04	2902.29	2914.93
ENSG00000136802	LRRC8A	56262	leucine rich repeat containing 8 family member A	chr9:128882501-128918038	+	0.233703	0.0531527	4.39683	1.09845e-05	0.000347903	Yes	OK	3233.71	2956.53	3510.89	2859.02	3054.05	3487.28	3534.49
ENSG00000168393	DTYMK	1841	deoxythymidylate kinase	chr2:241675741-241686968	-	-0.344949	0.0785298	-4.39259	1.12007e-05	0.000353932	Yes	OK	888.605	1009.86	767.35	1012.63	1007.09	751.714	782.987
ENSG00000162413	KLHL21	9903	kelch like family member 21	chr1:6590723-6602898	-	0.194711	0.0443432	4.391	1.1283e-05	0.000355711	Yes	OK	6227.13	5790.59	6663.68	5822.61	5758.56	6802.91	6524.44
ENSG00000168615	ADAM9	8754	ADAM metallopeptidase domain 9	chr8_KI270822v1_alt:7545-10943	+	-0.176586	0.0402424	-4.38806	1.14368e-05	0.000359736	Yes	OK	10067.3	10699.9	9434.81	10587.2	10812.6	9505.92	9363.69
ENSG00000223749	MIR424	494336	microRNA 424	chrX:134546613-134546711	-	-0.493897	0.112602	-4.38624	1.15327e-05	0.000361921	Yes	OK	66.4847	97.938	35.0314	118.323	77.5527	32.5545	37.5083
ENSG00000223749	MIR503HG	84848	MIR503 host gene	chrX:134543376-134546630	-	-0.493897	0.112602	-4.38624	1.15327e-05	0.000361921	Yes	OK	66.4847	97.938	35.0314	118.323	77.5527	32.5545	37.5083
ENSG00000149090	PAMR1	25891	peptidase domain containing associated with muscle regeneration 1	chr11:35431828-35526031	-	-0.457524	0.104364	-4.38391	1.1657e-05	0.000364985	Yes	OK	353.934	428.297	279.571	425.139	431.455	297.923	261.219
ENSG00000070614	NDST1	3340	N-deacetylase and N-sulfotransferase 1	chr5:150508111-150558211	+	-0.193652	0.044189	-4.38236	1.17403e-05	0.000366758	Yes	OK	12623.1	13502.6	11743.7	13310	13695.1	11344.8	12142.7
ENSG00000110427	KIAA1549L	25758	KIAA1549 like	chr11:33542330-33674100	+	-0.294781	0.0673644	-4.37592	1.20921e-05	0.000376889	Yes	OK	2221.26	2472.34	1970.17	2527.44	2417.24	1819.11	2121.23
ENSG00000150551	LYPD1	116372	LY6/PLAUR domain containing 1	chr2:132643279-132670370	-	-0.514762	0.117655	-4.37517	1.21338e-05	0.00037733	Yes	OK	89.6197	124.174	55.0653	123.827	124.521	57.217	52.9136
ENSG00000149554	CHEK1	1111	checkpoint kinase 1	chr11:125626228-125657147	+	-0.347767	0.0795602	-4.37112	1.23611e-05	0.000383529	Yes	OK	928.478	1056.8	800.154	1113.07	1000.54	807.944	792.364
ENSG00000138131	LOXL4	84171	lysyl oxidase like 4	chr10:98247685-98268250	-	-0.272842	0.0624598	-4.36828	1.25229e-05	0.000387672	Yes	OK	2692.21	2969.48	2414.95	2995.23	2943.72	2251.19	2578.7
ENSG00000115806	GORASP2	26003	golgi reassembly stacking protein 2	chr2:170928437-170967133	+	0.198292	0.0454565	4.36225	1.28732e-05	0.00039762	Yes	OK	4895.93	4546.15	5245.71	4558.2	4534.1	5296.52	5194.91
ENSG00000185803	SLC52A2	79581	solute carrier family 52 member 2	chr8:144358556-144361286	+	0.231957	0.0532142	4.35893	1.30701e-05	0.000402256	Yes	OK	2886.01	2640.69	3131.34	2597.61	2683.76	3136.09	3126.59
ENSG00000170873	MTSS1	9788	MTSS1, I-BAR domain containing	chr8:124550769-124728507	-	0.411216	0.0943432	4.35873	1.3082e-05	0.000402256	Yes	OK	543.051	446.624	639.478	433.394	459.854	672.794	606.162
ENSG00000154767	XPC	7508	XPC complex subunit, DNA damage recognition and repair factor	chr3:14145147-14178672	-	-0.25322	0.0581232	-4.3566	1.32098e-05	0.000405279	Yes	OK	2119.97	2318.62	1921.32	2318.31	2318.93	1904.93	1937.71
ENSG00000064655	EYA2	2139	EYA transcriptional coactivator and phosphatase 2	chr20:46894623-47188844	+	-0.422251	0.0969535	-4.35519	1.32952e-05	0.000406989	Yes	OK	540.471	641.02	439.923	639.772	642.267	395.587	484.259
ENSG00000235162	C12orf75	387882	chromosome 12 open reading frame 75	chr12:105330635-105371518	+	-0.329744	0.0757288	-4.35428	1.33507e-05	0.000407775	Yes	OK	1250.72	1411.83	1089.62	1335.95	1487.7	1031.88	1147.35
ENSG00000176014	TUBB6	84617	tubulin beta 6 class V	chr18:12307668-12326616	+	-0.204735	0.0470815	-4.34853	1.37053e-05	0.000417676	Yes	OK	9633.21	10346.1	8920.35	10068.5	10623.6	8585.52	9255.18
ENSG00000083312	TNPO1	3842	transportin 1	chr5:72848102-72914388	+	0.188808	0.04344	4.34641	1.38381e-05	0.00042079	Yes	OK	9337.28	8702.02	9972.55	8561.94	8842.09	10225.1	9720.02
ENSG00000111602	TIMELESS	8914	timeless circadian clock	chr12:56416372-56449465	-	-0.307013	0.0706475	-4.3457	1.38833e-05	0.000421228	Yes	OK	1427.07	1593.49	1260.65	1498.3	1688.68	1260.75	1260.55
ENSG00000162512	SDC3	9672	syndecan 3	chr1:30869465-30908633	-	-0.224882	0.0518226	-4.33945	1.42837e-05	0.000432422	Yes	OK	4412.6	4775.06	4050.15	4649.01	4901.11	3896.68	4203.61
ENSG00000138685	FGF2	2247	fibroblast growth factor 2	chr4:122826707-122898235	+	-0.220927	0.0510132	-4.33077	1.48586e-05	0.000448835	Yes	OK	5036.91	5441.7	4632.12	5240.63	5642.77	4486.61	4777.62
ENSG00000100036	SLC35E4	339665	solute carrier family 35 member E4	chr22:30635814-30647893	+	0.305259	0.0704962	4.33014	1.49013e-05	0.000449134	Yes	OK	1668.29	1475.74	1860.83	1590.49	1360.99	1836.86	1884.79
ENSG00000162430	SELENON	57190	selenoprotein N	chr1:25800175-25818222	+	-0.191055	0.0442255	-4.32003	1.56007e-05	0.000469185	Yes	OK	5809.75	6206.97	5412.53	6095.03	6318.9	5419.84	5405.22
ENSG00000127564	PKMYT1	9088	protein kinase, membrane associated tyrosine/threonine 1	chr16:2972790-2980539	-	-0.449056	0.104046	-4.31592	1.58937e-05	0.000476951	Yes	OK	412.523	499.327	325.719	504.938	493.715	287.072	364.367
ENSG00000159713	TPPP3	51673	tubulin polymerization promoting protein family member 3	chr16:67389806-67393535	-	0.509858	0.118154	4.31518	1.59471e-05	0.000477508	Yes	OK	142.88	96.7199	189.041	85.3029	108.137	182.503	195.579
ENSG00000244242	IFITM10	402778	interferon induced transmembrane protein 10	chr11:1732409-1750594	-	0.254327	0.0590596	4.30628	1.66022e-05	0.00049604	Yes	OK	3224.63	2921.43	3527.83	3069.53	2773.33	3665.84	3389.82
ENSG00000133026	MYH10	4628	myosin heavy chain 10	chr17:8474204-8630761	-	-0.244931	0.0569497	-4.30083	1.70157e-05	0.000507289	Yes	OK	3215.59	3507.51	2923.66	3446.51	3568.51	2777	3070.33
ENSG00000127483	HP1BP3	50809	heterochromatin protein 1 binding protein 3	chr1:20742677-20786688	-	-0.201194	0.0468182	-4.29733	1.72866e-05	0.000514247	Yes	OK	4314	4626.52	4001.49	4580.22	4672.82	3998.29	4004.69
ENSG00000105011	ASF1B	55723	anti-silencing function 1B histone chaperone	chr19:14119508-14136628	-	-0.436771	0.101703	-4.29458	1.75025e-05	0.000519545	Yes	OK	451.343	541.301	361.384	520.073	562.53	323.572	399.196
ENSG00000148516	ZEB1	6935	zinc finger E-box binding homeobox 1	chr10:31321620-31529814	+	0.210577	0.049122	4.28682	1.81251e-05	0.000536863	Yes	OK	4256.06	3929.09	4583.02	3864.77	3993.42	4689.82	4476.22
ENSG00000117152	RGS4	5999	regulator of G-protein signaling 4	chr1:163068605-163076802	+	-0.2685	0.062655	-4.28537	1.82433e-05	0.000539201	Yes	OK	2595.72	2855.64	2335.8	2680.16	3031.11	2263.03	2408.57
ENSG00000163430	MIR198	406975	microRNA 198	chr3:120395667-120395729	-	-0.215545	0.0504454	-4.27284	1.92996e-05	0.000569193	Yes	OK	50400	54346.5	46453.5	52687	56006.1	44246.5	48660.4
ENSG00000163430	FSTL1	11167	follistatin like 1	chr3:120394213-120451071	-	-0.215545	0.0504454	-4.27284	1.92996e-05	0.000569193	Yes	OK	50400	54346.5	46453.5	52687	56006.1	44246.5	48660.4
ENSG00000161888	SPC24	147841	SPC24, NDC80 kinetochore complex component	chr19:11145493-11155812	-	-0.471852	0.110596	-4.26645	1.98608e-05	0.000584486	Yes	OK	259.856	321.037	198.675	332.957	309.118	209.138	188.211
ENSG00000166986	MARS	4141	methionyl-tRNA synthetase	chr12:57487952-57516655	+	0.19873	0.0466404	4.26089	2.03614e-05	0.000597936	Yes	OK	5378.6	4992.25	5764.95	4854.01	5130.49	5698.03	5831.88
ENSG00000166986	MIR6758	102465454	microRNA 6758	chr12:57512687-57512750	+	0.19873	0.0466404	4.26089	2.03614e-05	0.000597936	Yes	OK	5378.6	4992.25	5764.95	4854.01	5130.49	5698.03	5831.88
ENSG00000097021	ACOT7	11332	acyl-CoA thioesterase 7	chr1:6264271-6360704	-	-0.235483	0.0552844	-4.25947	2.04911e-05	0.000600459	Yes	OK	2474.18	2688.36	2260.01	2710.43	2666.28	2256.13	2263.9
ENSG00000188517	COL25A1	84570	collagen type XXV alpha 1 chain	chr4:108823882-109302367	-	-0.50276	0.118201	-4.25342	2.1053e-05	0.000615611	Yes	OK	132.136	179.986	84.2869	151.344	208.628	66.0956	102.478
ENSG00000164713	BRI3	25798	brain protein I3	chr7:98281666-98291527	+	0.231564	0.0544546	4.25243	2.11463e-05	0.000617022	Yes	OK	2639.53	2416.05	2863.01	2410.5	2421.61	2835.2	2890.82
ENSG00000154027	AK5	26289	adenylate kinase 5	chr1:77281976-77559969	+	-0.472756	0.111194	-4.25165	2.12201e-05	0.000617861	Yes	OK	251.847	311.485	192.208	298.56	324.41	202.233	182.183
ENSG00000134013	LOXL2	4017	lysyl oxidase like 2	chr8:23296896-23404209	-	-0.200696	0.0472841	-4.24446	2.19116e-05	0.000636643	Yes	OK	24070.6	25815.1	22326.1	24960.7	26669.4	21534.3	23117.9
ENSG00000119900	OGFRL1	79627	opioid growth factor receptor like 1	chr6:71288441-71309059	+	-0.298711	0.0704074	-4.2426	2.20944e-05	0.000640596	Yes	OK	1254.39	1396.64	1112.13	1363.47	1429.81	1132.5	1091.76
ENSG00000172296	SPTLC3	55304	serine palmitoyltransferase long chain base subunit 3	chr20:13008978-13166764	+	0.362467	0.0855487	4.23697	2.2656e-05	0.000655496	Yes	OK	717.251	611.643	822.859	598.496	624.79	797.093	848.626
ENSG00000110080	ST3GAL4	6484	ST3 beta-galactoside alpha-2,3-sialyltransferase 4	chr11:126355893-126414641	+	0.224435	0.0531191	4.22513	2.38799e-05	0.000689451	Yes	OK	2947.81	2706.08	3189.55	2739.33	2672.84	3233.75	3145.34
ENSG00000137266	SLC22A23	63027	solute carrier family 22 member 23	chr6:3268973-3456559	-	0.230866	0.0546496	4.22447	2.39499e-05	0.000690019	Yes	OK	2593.81	2374.89	2812.73	2392.61	2357.16	2803.64	2821.83
ENSG00000132274	TRIM22	10346	tripartite motif containing 22	chr11:5689586-5710863	+	-0.222859	0.0528447	-4.21725	2.473e-05	0.000710999	Yes	OK	5038.56	5444.57	4632.55	5347.94	5541.19	4875.29	4389.82
ENSG00000151725	CENPU	79682	centromere protein U	chr4:184694064-184734132	-	-0.398636	0.0946049	-4.2137	2.51226e-05	0.000720776	Yes	OK	494.32	578.912	409.728	572.355	585.468	401.506	417.95
ENSG00000082212	ME2	4200	malic enzyme 2	chr18:50879061-50949792	+	-0.229027	0.05436	-4.21316	2.51826e-05	0.000720991	Yes	OK	2794.23	3029.62	2558.85	3011.74	3047.49	2498.81	2618.89
ENSG00000116962	NID1	4811	nidogen 1	chr1:235975831-236065181	-	-0.298887	0.0709565	-4.21226	2.52832e-05	0.000722363	Yes	OK	1420.11	1584.54	1255.68	1586.36	1582.73	1181.83	1329.54
ENSG00000177169	ULK1	8408	unc-51 like autophagy activating kinase 1	chr12:131894733-131923162	+	0.247325	0.0587275	4.2114	2.53791e-05	0.000723595	Yes	OK	2713.85	2468.32	2959.37	2546.71	2389.93	2845.07	3073.67
ENSG00000133131	MORC4	79710	MORC family CW-type zinc finger 4	chrX:106940733-107000244	-	-0.306726	0.0730479	-4.19897	2.68136e-05	0.000762909	Yes	OK	1091.5	1221.21	961.799	1224.51	1217.9	947.041	976.556
ENSG00000078098	FAP	2191	fibroblast activation protein alpha	chr2:162170683-162243535	-	0.192207	0.045951	4.18288	2.87843e-05	0.000817283	Yes	OK	4986.52	4642.8	5330.24	4732.94	4552.67	5318.23	5342.26
ENSG00000138594	TMOD3	29766	tropomodulin 3	chr15:51829627-51912134	+	-0.206004	0.0492706	-4.18108	2.90132e-05	0.00082208	Yes	OK	3910.07	4200.88	3619.25	4101.42	4300.35	3611.58	3626.92
ENSG00000144867	SRPRB	58477	SRP receptor beta subunit	chr3:133784032-133821492	+	0.219424	0.0524971	4.17973	2.91857e-05	0.000825263	Yes	OK	4023.84	3698.75	4348.93	3611.62	3785.88	4508.31	4189.55
ENSG00000010404	IDS	3423	iduronate 2-sulfatase	chrX:149487130-149505354	-	0.169017	0.0405099	4.17224	3.01621e-05	0.000851117	Yes	OK	9574.77	8995.61	10153.9	8893.52	9097.69	10220.1	10087.7
ENSG00000013588	MIR614	693199	microRNA 614	chr12:12915828-12915918	+	0.402608	0.0965466	4.17009	3.04475e-05	0.000855434	Yes	OK	664.621	546.805	782.438	531.08	562.53	876.999	687.876
ENSG00000013588	GPRC5A	9052	G protein-coupled receptor class C group 5 member A	chr12:12891021-12913666	+	0.402608	0.0965466	4.17009	3.04475e-05	0.000855434	Yes	OK	664.621	546.805	782.438	531.08	562.53	876.999	687.876
ENSG00000050405	LIMA1	51474	LIM domain and actin binding 1	chr12:50175779-50201533	-	-0.193066	0.0463002	-4.16987	3.04778e-05	0.000855434	Yes	OK	8473.41	9066.44	7880.38	9135.67	8997.2	7562.52	8198.25
ENSG00000008083	JARID2	3720	jumonji and AT-rich interaction domain containing 2	chr6:15248854-15522042	+	0.302256	0.0724951	4.16932	3.05504e-05	0.000855434	Yes	OK	1204.71	1063.76	1345.66	1074.54	1052.97	1393.93	1297.39
ENSG00000136888	ATP6V1G1	9550	ATPase H+ transporting V1 subunit G1	chr9:114587713-114598872	+	0.239335	0.0574078	4.16904	3.05884e-05	0.000855434	Yes	OK	2257.28	2058.02	2456.53	2078.92	2037.12	2481.05	2432.01
ENSG00000111670	GNPTAB	79158	N-acetylglucosamine-1-phosphate transferase alpha and beta subunits	chr12:101745496-101830867	-	-0.214249	0.051394	-4.16875	3.06269e-05	0.000855434	Yes	OK	3144.92	3389.59	2900.26	3351.58	3427.61	2900.31	2900.2
ENSG00000060339	CCAR1	55749	cell division cycle and apoptosis regulator 1	chr10:68721143-68792377	+	-0.24129	0.0579048	-4.16701	3.08618e-05	0.00086024	Yes	OK	2357.98	2566.75	2149.21	2579.73	2553.78	2214.69	2083.72
ENSG00000117155	SSX2IP	117178	SSX family member 2 interacting protein	chr1:84643706-84690557	-	-0.259409	0.062297	-4.16407	3.12623e-05	0.000869638	Yes	OK	1914.73	2102.03	1727.44	2161.47	2042.58	1683.96	1770.93
ENSG00000168497	SDPR	8436	serum deprivation response	chr2:191834305-191847280	-	-0.470928	0.113153	-4.16188	3.15632e-05	0.000876229	Yes	OK	68.269	98.0538	38.4842	77.0478	119.06	39.46	37.5083
ENSG00000135540	NHSL1	57224	NHS like 1	chr6:138422043-138499442	-	-0.442364	0.106314	-4.16091	3.16977e-05	0.000878185	Yes	OK	317.107	383.975	250.238	403.125	364.825	246.625	253.851
ENSG00000204389	HSPA1A	3303	heat shock protein family A (Hsp70) member 1A	chr6:31815513-31817942	+	0.387913	0.0932518	4.15985	3.18458e-05	0.000880511	Yes	OK	776.294	650.005	902.583	668.665	631.344	795.12	1010.05
ENSG00000214435	AS3MT	57412	arsenite methyltransferase	chr10:102869452-102901898	+	-0.425171	0.102513	-4.1475	3.3612e-05	0.000926644	Yes	OK	379.545	453.483	305.607	441.649	465.316	289.045	322.17
ENSG00000198961	PJA2	9867	praja ring finger ubiquitin ligase 2	chr5:109334708-109409974	-	0.173389	0.0418082	4.14725	3.36495e-05	0.000926644	Yes	OK	7154.8	6710.89	7598.7	6660.51	6761.28	7566.46	7630.94
ENSG00000149212	SESN3	143686	sestrin 3	chr11:95165512-95231082	-	-0.399266	0.0963165	-4.14536	3.39283e-05	0.000932449	Yes	OK	489.117	574.054	404.18	551.717	596.391	385.722	422.639
ENSG00000124608	AARS2	57505	alanyl-tRNA synthetase 2, mitochondrial	chr6:44298725-44313326	-	-0.318018	0.0767554	-4.14327	3.42389e-05	0.000938172	Yes	OK	1026.56	1154.56	898.561	1113.07	1196.06	868.121	929.001
ENSG00000172175	MALT1	10892	MALT1 paracaspase	chr18:58671385-58750139	+	-0.247542	0.0597488	-4.14304	3.42733e-05	0.000938172	Yes	OK	1974.92	2156.56	1793.29	2139.45	2173.66	1770.77	1815.81
ENSG00000020129	NCDN	23154	neurochondrin	chr1:35557791-35566779	+	0.213109	0.0514447	4.14248	3.43575e-05	0.000938602	Yes	OK	3134.48	2891.83	3377.12	2898.92	2884.74	3357.06	3397.18
ENSG00000147100	SLC16A2	6567	solute carrier family 16 member 2	chrX:74421492-74533929	+	-0.430181	0.104052	-4.1343	3.56031e-05	0.000970697	Yes	OK	1943.97	2331.73	1556.21	2281.17	2382.29	1403.79	1708.64
ENSG00000128272	ATF4	468	activating transcription factor 4	chr22:39520563-39522686	+	0.236312	0.0572087	4.1307	3.6166e-05	0.000984087	Yes	OK	4017.21	3663.77	4370.66	3425.88	3901.66	4458	4283.32
ENSG00000182372	MIR3674	100500912	microRNA 3674	chr8:1801124-1801192	+	0.236834	0.0573496	4.12965	3.63316e-05	0.000986638	Yes	OK	2662.81	2430.02	2895.61	2349.96	2510.08	2823.37	2967.85
ENSG00000182372	CLN8	2055	ceroid-lipofuscinosis, neuronal 8	chr8:1763703-1786570	+	0.236834	0.0573496	4.12965	3.63316e-05	0.000986638	Yes	OK	2662.81	2430.02	2895.61	2349.96	2510.08	2823.37	2967.85
ENSG00000149503	INCENP	3619	inner centromere protein	chr11:62123972-62153163	+	-0.336689	0.0817021	-4.12094	3.77328e-05	0.00102141	Yes	OK	1007.02	1144.13	869.921	1133.7	1154.55	796.106	943.737
ENSG00000138829	FBN2	2201	fibrillin 2	chr5:128257908-128538042	-	-0.476763	0.115697	-4.12077	3.7761e-05	0.00102141	Yes	OK	180.522	228.34	132.703	228.392	228.289	136.137	129.27
ENSG00000015479	MATR3	9782	matrin 3	chr5:139273751-139331677	+	0.175247	0.0425793	4.11579	3.85863e-05	0.00104168	Yes	OK	8907	8349.61	9464.38	8560.56	8138.66	9512.83	9415.93
ENSG00000167173	C15orf39	56905	chromosome 15 open reading frame 39	chr15:75201879-75212169	+	0.30128	0.0733563	4.10708	4.00686e-05	0.00107957	Yes	OK	1214.46	1074.48	1354.44	1093.8	1055.15	1294.29	1414.6
ENSG00000103249	CLCN7	1186	chloride voltage-gated channel 7	chr16:1444932-1475084	-	0.199325	0.0485854	4.10257	4.08582e-05	0.00109868	Yes	OK	3944.73	3661.5	4227.97	3690.04	3632.96	4169.94	4286
ENSG00000173812	EIF1	10209	eukaryotic translation initiation factor 1	chr17:41688874-41691646	+	0.160567	0.0391557	4.10073	4.11844e-05	0.00110325	Yes	OK	16031.4	15115.3	16947.5	15302.2	14928.3	17010.2	16884.8
ENSG00000066468	FGFR2	2263	fibroblast growth factor receptor 2	chr10:121478329-121598458	-	-0.483676	0.117949	-4.10071	4.11888e-05	0.00110325	Yes	OK	154.972	201.8	108.145	214.633	188.966	93.7176	122.572
ENSG00000142089	IFITM3	10410	interferon induced transmembrane protein 3	chr11:319672-320914	-	-0.217528	0.0531105	-4.09577	4.20776e-05	0.00112486	Yes	OK	3392.2	3664.15	3120.25	3705.17	3623.13	3012.77	3227.73
ENSG00000137962	ARHGAP29	9411	Rho GTPase activating protein 29	chr1:94168906-94237751	-	-0.317668	0.0776101	-4.09312	4.25605e-05	0.00113555	Yes	OK	929.536	1044.73	814.336	1027.76	1061.71	831.62	797.052
ENSG00000169744	LDB2	9079	LIM domain binding 2	chr4:16501533-16898809	-	-0.375021	0.0916984	-4.08972	4.3189e-05	0.00115	Yes	OK	633.777	735.051	532.504	736.082	734.019	488.318	576.691
ENSG00000150403	TMCO3	55002	transmembrane and coiled-coil domains 3	chr13:113490992-113550229	+	0.183662	0.0449129	4.08929	4.32697e-05	0.00115	Yes	OK	6020.59	5621.9	6419.29	5484.15	5759.65	6375.75	6462.82
ENSG00000165633	VSTM4	196740	V-set and transmembrane domain containing 4	chr10:49102171-49115532	-	0.237195	0.0581671	4.07782	4.54593e-05	0.00120586	Yes	OK	2600.69	2374.95	2826.44	2409.12	2340.78	2715.84	2937.04
ENSG00000183048	SLC25A10	1468	solute carrier family 25 member 10	chr17:81712235-81721016	+	-0.442646	0.108575	-4.07687	4.56455e-05	0.00120846	Yes	OK	306.565	373.494	239.636	375.608	371.379	216.044	263.228
ENSG00000128849	CGNL1	84952	cingulin like 1	chr15:57376504-57550727	+	-0.482382	0.118419	-4.07352	4.63088e-05	0.00122366	Yes	OK	115.964	155.168	76.7608	159.599	150.736	65.1091	88.4125
ENSG00000109066	TMEM104	54868	transmembrane protein 104	chr17:74776482-74839783	+	0.279157	0.0685761	4.07077	4.6858e-05	0.0012345	Yes	OK	1924.52	1718.19	2130.85	1579.48	1856.89	2117.03	2144.67
ENSG00000164938	TP53INP1	94241	tumor protein p53 inducible nuclear protein 1	chr8:94925971-94949387	-	-0.255202	0.0626944	-4.07057	4.68992e-05	0.0012345	Yes	OK	1705.04	1867.79	1542.28	1891.8	1843.79	1552.75	1531.81
ENSG00000076356	PLXNA2	5362	plexin A2	chr1:208022242-208244320	-	-0.266904	0.0655965	-4.06887	4.72425e-05	0.00124116	Yes	OK	1873.91	2061.03	1686.78	1938.58	2183.49	1681	1692.56
ENSG00000152253	SPC25	57405	SPC25, NDC80 kinetochore complex component	chr2:168870890-168890434	-	-0.467299	0.114998	-4.06354	4.83345e-05	0.00126742	Yes	OK	191.096	239.972	142.221	235.271	244.673	139.097	145.345
ENSG00000106665	CLIP2	7461	CAP-Gly domain containing linker protein 2	chr7:74289474-74405943	+	0.215901	0.0531417	4.06273	4.85015e-05	0.00126937	Yes	OK	3469.77	3195.68	3743.85	3091.54	3299.81	3663.86	3823.84
ENSG00000188921	HACD4	401494	3-hydroxyacyl-CoA dehydratase 4	chr9:21003623-21031675	-	-0.42625	0.104982	-4.0602	4.90297e-05	0.00128075	Yes	OK	331.542	397.708	265.376	387.991	407.424	257.477	273.275
ENSG00000050393	MCUR1	63933	mitochondrial calcium uniporter regulator 1	chr6:13786548-13814560	-	0.294302	0.0725008	4.0593	4.92204e-05	0.00128329	Yes	OK	1179.49	1045.1	1313.87	1052.53	1037.68	1354.47	1273.27
ENSG00000111331	OAS3	4940	2'-5'-oligoadenylate synthetase 3	chr12:112938432-112973249	+	-0.443334	0.109437	-4.05105	5.09884e-05	0.00132686	Yes	OK	272.547	331.756	213.338	315.071	348.441	217.03	209.645
ENSG00000163162	RNF149	284996	ring finger protein 149	chr2:101275600-101308716	-	0.233982	0.0577712	4.05015	5.11856e-05	0.00132947	Yes	OK	2448.4	2237.63	2659.17	2311.43	2163.83	2696.11	2622.23
ENSG00000131462	TUBG1	7283	tubulin gamma 1	chr17:42609339-42615238	+	-0.252375	0.0623377	-4.04852	5.15428e-05	0.00133621	Yes	OK	1767.5	1934.04	1600.95	1898.68	1969.4	1582.35	1619.56
ENSG00000090530	P3H2	55214	prolyl 3-hydroxylase 2	chr3:189956727-190121119	-	-0.381541	0.0942856	-4.04665	5.19555e-05	0.00134437	Yes	OK	526.005	612.006	440.003	586.114	637.898	423.209	456.798
ENSG00000152818	UTRN	7402	utrophin	chr6:144291736-144853034	+	-0.231157	0.0571969	-4.04143	5.31262e-05	0.00137208	Yes	OK	3391.04	3680.55	3101.52	3530.44	3830.66	2973.31	3229.74
ENSG00000118816	CCNI	10983	cyclin I	chr4:77048020-77075972	-	0.165574	0.0409754	4.04082	5.32647e-05	0.00137307	Yes	OK	8074.13	7595.69	8552.57	7567.2	7624.19	8610.18	8494.97
ENSG00000175455	CCDC14	64770	coiled-coil domain containing 14	chr3:123913426-123961408	-	-0.241957	0.0600246	-4.03097	5.55482e-05	0.00142925	Yes	OK	2424.56	2640.53	2208.58	2665.03	2616.04	2313.34	2103.82
ENSG00000102802	MEDAG	84935	mesenteric estrogen dependent adipogenesis	chr13:30906174-30925572	+	0.353792	0.0877925	4.02987	5.58076e-05	0.00143323	Yes	OK	717.901	614.342	821.46	661.786	566.899	821.755	821.165
ENSG00000164484	TMEM200A	114801	transmembrane protein 200A	chr6:130366280-130443065	+	0.292044	0.0724993	4.02824	5.61968e-05	0.00144053	Yes	OK	1125.75	999.058	1252.43	1008.5	989.616	1261.73	1243.13
ENSG00000121690	DEPDC7	91614	DEP domain containing 7	chr11:33015863-33033582	+	-0.417561	0.103765	-4.0241	5.71946e-05	0.00146337	Yes	OK	356.895	426.317	287.474	443.025	409.609	276.22	298.727
ENSG00000119950	MXI1	4601	MAX interactor 1, dimerization protein	chr10:110210230-110287365	+	0.29808	0.0741103	4.02211	5.76802e-05	0.00147305	Yes	OK	1050.74	929.404	1172.07	931.453	927.355	1169.99	1174.15
ENSG00000115641	FHL2	2274	four and a half LIM domains 2	chr2:105360825-105399224	-	-0.193474	0.0481083	-4.02163	5.77979e-05	0.00147331	Yes	OK	6670.45	7135.76	6205.13	6829.74	7441.78	6120.25	6290.01
ENSG00000136159	NUDT15	55270	nudix hydrolase 15	chr13:48037566-48041502	+	-0.352047	0.0876548	-4.01629	5.91203e-05	0.00150251	Yes	OK	680.358	779.887	580.83	821.385	738.389	568.224	593.436
ENSG00000144554	FANCD2	2177	Fanconi anemia complementation group D2	chr3:10026386-10099660	+	-0.434197	0.108113	-4.01613	5.91624e-05	0.00150251	Yes	OK	286.09	346.244	225.936	354.97	337.518	230.841	221.031
ENSG00000182667	NTM	50863	neurotrimin	chr11:131370475-132336822	+	-0.429562	0.107165	-4.0084	6.11307e-05	0.00154707	Yes	OK	332.172	401.289	263.055	396.246	406.332	236.76	289.35
ENSG00000137177	KIF13A	63971	kinesin family member 13A	chr6:17950405-17987623	-	-0.174198	0.0434587	-4.00836	6.11429e-05	0.00154707	Yes	OK	6199.35	6588.33	5810.37	6637.12	6539.55	5730.58	5890.15
ENSG00000164574	GALNT10	55568	polypeptide N-acetylgalactosaminyltransferase 10	chr5:154190734-154420983	+	-0.199603	0.0498088	-4.00738	6.13967e-05	0.00154712	Yes	OK	9678.14	10381.2	8975.1	10149.7	10612.7	8513.5	9436.7
ENSG00000068305	MEF2A	4205	myocyte enhancer factor 2A	chr15:99565927-99716488	+	0.221783	0.0553441	4.00735	6.14032e-05	0.00154712	Yes	OK	2779.63	2551.85	3007.41	2466.91	2636.79	3010.8	3004.02
ENSG00000197170	PSMD12	5718	proteasome 26S subunit, non-ATPase 12	chr17:67337915-67366627	-	0.198782	0.0496081	4.00705	6.14831e-05	0.00154712	Yes	OK	4345.51	4031.42	4659.6	4094.54	3968.29	4793.41	4525.78
ENSG00000034510	TMSB10	9168	thymosin beta 10	chr2:84905638-84906675	+	-0.161097	0.0402428	-4.00314	6.25078e-05	0.00157002	Yes	OK	19740.1	20874	18606.3	20471.3	21276.7	18462.4	18750.2
ENSG00000140961	OSGIN1	29948	oxidative stress induced growth inhibitor 1	chr16:83953221-83966332	+	0.231565	0.0578679	4.00162	6.29114e-05	0.00157727	Yes	OK	4880.76	4461.32	5300.2	4545.82	4376.81	5671.39	4929
ENSG00000166780	C16orf45	89927	chromosome 16 open reading frame 45	chr16:15502265-15588259	+	0.251981	0.0630053	3.99935	6.35158e-05	0.00158952	Yes	OK	2392.92	2164.46	2621.38	2099.55	2229.37	2763.19	2479.57
ENSG00000123219	CENPK	64105	centromere protein K	chr5:65517765-65563168	-	-0.395462	0.0989017	-3.99854	6.3735e-05	0.0015921	Yes	OK	474.413	557.291	391.534	595.745	518.838	413.344	369.725
ENSG00000129195	FAM64A	54478	family with sequence similarity 64 member A	chr17:6444414-6451065	+	-0.469365	0.117439	-3.99668	6.42384e-05	0.00160175	Yes	OK	152.786	195.283	110.289	188.492	202.074	115.421	105.157
ENSG00000143256	PFDN2	5202	prefoldin subunit 2	chr1:161100555-161118076	-	0.262624	0.0657857	3.99211	6.54881e-05	0.00162995	Yes	OK	1581.32	1423.43	1739.21	1406.12	1440.73	1788.53	1689.88
ENSG00000158402	CDC25C	995	cell division cycle 25C	chr5:138285264-138331877	-	-0.470521	0.117913	-3.99041	6.59593e-05	0.00163871	Yes	OK	142.141	182.963	101.32	180.237	185.689	107.529	95.1104
ENSG00000123080	CDKN2C	1031	cyclin dependent kinase inhibitor 2C	chr1:50969969-50974637	+	-0.412135	0.103304	-3.98953	6.62047e-05	0.00164183	Yes	OK	354.319	421.134	287.505	408.629	433.639	291.018	283.992
ENSG00000165732	DDX21	9188	DEAD-box helicase 21	chr10:68956122-68985069	+	0.17638	0.0442342	3.98741	6.67989e-05	0.00165168	Yes	OK	6446.4	6036.91	6855.88	6077.15	5996.68	7005.14	6706.63
ENSG00000132561	MATN2	4147	matrilin 2	chr8:97869020-98036718	+	-0.446545	0.111993	-3.98725	6.68429e-05	0.00165168	Yes	OK	274.043	337.033	211.053	302.688	371.379	192.368	229.739
ENSG00000086061	DNAJA1	3301	DnaJ heat shock protein family (Hsp40) member A1	chr9:33025202-33039907	+	0.169061	0.042406	3.98672	6.69924e-05	0.0016524	Yes	OK	7143.91	6710.64	7577.18	6737.56	6683.73	7684.84	7469.52
ENSG00000164692	COL1A2	1278	collagen type I alpha 2 chain	chr7:94394560-94431232	+	-0.221701	0.0556583	-3.98324	6.79807e-05	0.00167377	Yes	OK	216402	234026	198778	223115	244936	190331	207226
ENSG00000026103	FAS	355	Fas cell surface death receptor	chr10:88990558-89017061	+	-0.22748	0.0571212	-3.98241	6.8219e-05	0.00167662	Yes	OK	2502.41	2714.19	2290.62	2754.46	2673.93	2223.57	2357.67
ENSG00000135596	MICAL1	64780	microtubule associated monooxygenase, calponin and LIM domain containing 1	chr6:109444062-109455987	-	-0.278273	0.0699417	-3.97864	6.9311e-05	0.00170041	Yes	OK	1412.68	1562.07	1263.29	1601.49	1522.65	1318.95	1207.63
ENSG00000196639	HRH1	3269	histamine receptor H1	chr3:11252698-11263253	+	0.281567	0.0709561	3.96819	7.24211e-05	0.00177354	Yes	OK	1262.08	1124.58	1399.58	1092.43	1156.74	1429.44	1369.72
ENSG00000123975	CKS2	1164	CDC28 protein kinase regulatory subunit 2	chr9:89311194-89316703	+	-0.369111	0.0930698	-3.96596	7.31006e-05	0.00178699	Yes	OK	525.942	608.062	443.822	590.241	625.883	444.912	442.732
ENSG00000130340	SNX9	51429	sorting nexin 9	chr6:157823170-157945077	+	0.177789	0.044855	3.96363	7.38187e-05	0.0017992	Yes	OK	5094.45	4768.13	5420.77	4730.19	4806.08	5433.65	5407.9
ENSG00000047936	ROS1	6098	ROS proto-oncogene 1, receptor tyrosine kinase	chr6:117288366-117425855	-	-0.467265	0.117904	-3.96309	7.3987e-05	0.0017992	Yes	OK	171.053	220.936	121.169	220.137	221.735	97.6636	144.675
ENSG00000139926	FRMD6	122786	FERM domain containing 6	chr14:51489120-51730726	+	-0.208575	0.0526296	-3.96307	7.39936e-05	0.0017992	Yes	OK	5515.35	5935.62	5095.07	5687.78	6183.46	4890.08	5300.06
ENSG00000203760	CENPW	387103	centromere protein W	chr6:126339788-126348875	+	-0.436803	0.110244	-3.96215	7.42778e-05	0.00180291	Yes	OK	263.386	321.095	205.677	312.319	329.872	194.341	217.013
ENSG00000087086	FTL	2512	ferritin light chain	chr19:48965308-48966879	+	0.16682	0.0422018	3.95292	7.72024e-05	0.00187059	Yes	OK	184877	173838	195916	173303	174374	197015	194817
ENSG00000107262	BAG1	573	BCL2 associated athanogene 1	chr9:33252470-33264761	-	0.318999	0.0807258	3.95164	7.76163e-05	0.0018773	Yes	OK	845.249	737.54	952.959	744.337	730.743	979.595	926.322
ENSG00000116191	RALGPS2	55103	Ral GEF with PH domain and SH3 binding motif 2	chr1:178725146-178921842	+	-0.298601	0.0755828	-3.95065	7.79383e-05	0.00188177	Yes	OK	1223.9	1367.24	1080.56	1316.69	1417.79	1015.11	1146.01
ENSG00000142178	SIK1	150094	salt inducible kinase 1	chr21:6111139-6123742	+	0.401065	0.101538	3.9499	7.81834e-05	0.00188437	Yes	OK	393.312	321.379	465.245	315.071	327.687	482.399	448.091
ENSG00000166508	MCM7	4176	minichromosome maintenance complex component 7	chr7:100092727-100101940	-	-0.286983	0.0726758	-3.94881	7.85418e-05	0.00188969	Yes	OK	1270.73	1411.93	1129.53	1363.47	1460.39	1080.22	1178.83
ENSG00000198700	IPO9	55705	importin 9	chr1:201829159-201884294	+	-0.194536	0.0494004	-3.93794	8.21854e-05	0.00197389	Yes	OK	3909.49	4187.17	3631.81	4265.15	4109.2	3575.08	3688.54
ENSG00000134242	PTPN22	26191	protein tyrosine phosphatase, non-receptor type 22	chr1:113813810-113871759	-	0.315536	0.0801412	3.93725	8.24202e-05	0.00197607	Yes	OK	979.255	854.829	1103.68	817.257	892.402	1159.14	1048.22
ENSG00000188549	C15orf52	388115	chromosome 15 open reading frame 52	chr15:40331451-40340967	-	-0.23442	0.0595933	-3.93367	8.36595e-05	0.00199981	Yes	OK	2009.85	2185.15	1834.55	2226.13	2144.17	1835.88	1833.22
ENSG00000073111	MCM2	4171	minichromosome maintenance complex component 2	chr3:127598356-127622435	+	-0.302955	0.0770183	-3.93354	8.37023e-05	0.00199981	Yes	OK	981.954	1099.73	864.181	1126.82	1072.63	837.539	890.823
ENSG00000212724	KRTAP2-3	730755	keratin associated protein 2-3	chr17:41059240-41060092	-	-0.40995	0.104253	-3.93227	8.41459e-05	0.00200692	Yes	OK	501.234	598.399	404.069	634.269	562.53	343.302	464.836
ENSG00000136153	LMO7	4008	LIM domain 7	chr13:75620433-75859871	+	-0.171598	0.0437062	-3.92618	8.63062e-05	0.00205487	Yes	OK	8429.76	8949.98	7909.53	8816.47	9083.49	7706.54	8112.52
ENSG00000205336	ADGRG1	9289	adhesion G protein-coupled receptor G1	chr16:57628225-57665039	+	0.204026	0.0519711	3.92576	8.64571e-05	0.00205489	Yes	OK	4064.29	3759.53	4369.05	3724.44	3794.62	4541.85	4196.25
ENSG00000108175	ZMIZ1	57178	zinc finger MIZ-type containing 1	chr10:79069034-79316528	+	0.159404	0.0406212	3.92415	8.70381e-05	0.00206512	Yes	OK	10837.6	10218.8	11456.3	10042.4	10395.3	11515.4	11397.2
ENSG00000166741	NNMT	4837	nicotinamide N-methyltransferase	chr11:114295812-114312516	+	-0.198064	0.0504973	-3.92227	8.77178e-05	0.00207766	Yes	OK	3592.36	3850.94	3333.77	3779.47	3922.42	3283.07	3384.46
ENSG00000124588	NQO2	4835	NAD(P)H quinone dehydrogenase 2	chr6:2999815-3019876	+	0.287123	0.0732598	3.91924	8.88295e-05	0.00210036	Yes	OK	1136.03	1008.9	1263.15	976.856	1040.95	1280.48	1245.81
ENSG00000116478	HDAC1	3065	histone deacetylase 1	chr1:32292106-32333623	+	-0.222872	0.0568797	-3.91831	8.91707e-05	0.0021048	Yes	OK	2307.68	2496.39	2118.98	2495.8	2496.98	2151.56	2086.4
ENSG00000189159	HN1	51155	hematological and neurological expressed 1	chr17:75135242-75153293	-	-0.251542	0.0642381	-3.91577	9.01158e-05	0.00212345	Yes	OK	1800.93	1971.83	1630.04	1926.2	2017.46	1569.52	1690.55
ENSG00000072195	LOC100996693	100996693	CAVP-target protein-like	chr2:219496354-219498287	+	-0.244035	0.0623791	-3.91213	9.14859e-05	0.00215204	Yes	OK	2930.43	3200.52	2660.34	3430	2971.03	2605.35	2715.34
ENSG00000072195	SPEG	10290	SPEG complex locus	chr2:219434977-219493632	+	-0.244035	0.0623791	-3.91213	9.14859e-05	0.00215204	Yes	OK	2930.43	3200.52	2660.34	3430	2971.03	2605.35	2715.34
ENSG00000146592	CREB5	9586	cAMP responsive element binding protein 5	chr7:28299320-28825894	+	0.392427	0.100339	3.91102	9.19077e-05	0.00215826	Yes	OK	418.118	343.997	492.239	338.46	349.533	514.953	469.524
ENSG00000135926	TMBIM1	64114	transmembrane BAX inhibitor motif containing 1	chr2:218274191-218290002	-	0.170209	0.0435457	3.90874	9.2778e-05	0.00217342	Yes	OK	11317.9	10623.4	12012.5	10321.7	10925.1	12232.6	11792.4
ENSG00000135926	MIR6513	102465256	microRNA 6513	chr2:218280124-218280188	-	0.170209	0.0435457	3.90874	9.2778e-05	0.00217342	Yes	OK	11317.9	10623.4	12012.5	10321.7	10925.1	12232.6	11792.4
ENSG00000143387	CTSK	1513	cathepsin K	chr1:150796207-150808441	-	0.254435	0.0650997	3.90839	9.29117e-05	0.00217342	Yes	OK	1598.24	1446.15	1750.33	1457.03	1435.27	1707.63	1793.03
ENSG00000169902	TPST1	8460	tyrosylprotein sulfotransferase 1	chr7:66205271-66360451	+	0.225181	0.0576192	3.90809	9.30289e-05	0.00217342	Yes	OK	3028.57	2773.9	3283.25	2692.55	2855.25	3423.16	3143.33
ENSG00000185022	MAFF	23764	MAF bZIP transcription factor F	chr22:38201931-38216510	+	0.350984	0.0898688	3.90552	9.40235e-05	0.00219292	Yes	OK	692.789	589.892	795.686	551.717	628.067	838.526	752.846
ENSG00000168496	FEN1	2237	flap structure-specific endonuclease 1	chr11:61792636-61797242	+	-0.272307	0.0697485	-3.90413	9.45641e-05	0.00220179	Yes	OK	1257.62	1389.14	1126.1	1402	1376.29	1106.85	1145.34
ENSG00000026508	CD44	960	CD44 molecule (Indian blood group)	chr11:35138869-35232402	+	0.156913	0.0401971	3.9036	9.47729e-05	0.00220291	Yes	OK	70317.1	66381.1	74253.1	66102.9	66659.2	73341.4	75164.7
ENSG00000115216	NRBP1	29959	nuclear receptor binding protein 1	chr2:27428551-27442257	+	0.162209	0.041594	3.89982	9.62636e-05	0.00223377	Yes	OK	9415.38	8867.54	9963.23	8678.89	9056.18	9964.64	9961.81
ENSG00000170734	POLH	5429	DNA polymerase eta	chr6:43576140-43620523	+	-0.292373	0.075057	-3.89535	9.80566e-05	0.00227153	Yes	OK	1093.96	1216.93	970.983	1177.73	1256.13	1004.26	937.709
ENSG00000128944	KNSTRN	90417	kinetochore localized astrin/SPAG5 binding protein	chr15:40382720-40394288	+	-0.352628	0.0906042	-3.89196	9.94372e-05	0.00229963	Yes	OK	569.119	653.198	485.04	646.651	659.744	478.453	491.627
ENSG00000196352	CD55	1604	CD55 molecule (Cromer blood group)	chr1:207321471-207360966	+	0.290993	0.0748984	3.88518	0.000102255	0.00236082	Yes	OK	1188.64	1053.54	1323.75	1081.42	1025.66	1390.97	1256.53
ENSG00000171992	SYNPO	11346	synaptopodin	chr5:150640644-150659230	+	-0.25159	0.0647716	-3.88427	0.00010264	0.00236572	Yes	OK	2412.51	2644.02	2181	2720.06	2567.98	2035.15	2326.86
ENSG00000157551	KCNJ15	3772	potassium voltage-gated channel subfamily J member 15	chr21:38256697-38301824	+	0.457569	0.117827	3.88341	0.000103	0.00236642	Yes	OK	93.0788	60.8529	125.305	60.5376	61.1683	121.34	129.27
ENSG00000128594	LRRC4	64101	leucine rich repeat containing 4	chr7:128027070-128030949	-	-0.453135	0.116696	-3.88305	0.000103154	0.00236642	Yes	OK	164.404	207.382	121.426	210.506	204.258	124.299	118.553
ENSG00000137845	ADAM10	102	ADAM metallopeptidase domain 10	chr15:58595203-58749978	-	-0.17916	0.04614	-3.88297	0.000103188	0.00236642	Yes	OK	5044.74	5371.99	4717.49	5364.45	5379.53	4615.84	4819.15
ENSG00000180530	NRIP1	8204	nuclear receptor interacting protein 1	chr21:14961234-15064805	-	-0.225032	0.0580291	-3.87792	0.000105353	0.00241204	Yes	OK	2500.28	2708.96	2291.6	2815	2602.93	2317.29	2265.91
ENSG00000162631	NTNG1	22854	netrin G1	chr1:107148068-107484899	+	-0.458296	0.118323	-3.87328	0.000107381	0.00245438	Yes	OK	102.372	135.564	69.1802	138.961	132.167	70.0416	68.3188
ENSG00000100162	CENPM	79019	centromere protein M	chr22:41938720-41946754	-	-0.458274	0.118366	-3.87169	0.000108085	0.00246635	Yes	OK	145.05	188.404	101.696	174.733	202.074	84.8391	118.553
ENSG00000166845	C18orf54	162681	chromosome 18 open reading frame 54	chr18:54357916-54382035	+	-0.387346	0.100241	-3.86415	0.000111477	0.00253953	Yes	OK	414.388	486.382	342.393	511.818	460.947	349.221	335.566
ENSG00000175274	TP53I11	9537	tumor protein p53 inducible protein 11	chr11:44932347-44950904	-	-0.242492	0.0631967	-3.83711	0.000124492	0.00283131	Yes	OK	1732.08	1889.63	1574.52	1854.65	1924.62	1542.89	1606.16
ENSG00000139971	C14orf37	145407	chromosome 14 open reading frame 37	chr14:58004055-58152239	-	-0.34318	0.0894693	-3.83573	0.000125194	0.00284256	Yes	OK	612.65	700.801	524.498	705.813	695.789	503.115	545.88
ENSG00000115419	GLS	2744	glutaminase	chr2:190880820-190935289	+	-0.150726	0.0393121	-3.8341	0.000126025	0.00285671	Yes	OK	13324.5	14041.5	12607.5	14204.3	13878.6	12566	12649
ENSG00000120063	GNA13	10672	G protein subunit alpha 13	chr17:65009288-65056802	-	0.204909	0.0534556	3.83325	0.000126462	0.00286187	Yes	OK	2915.47	2698.17	3132.77	2704.93	2691.4	3071.96	3193.57
ENSG00000161904	LEMD2	221496	LEM domain containing 2	chr6:33771212-33789129	-	0.199668	0.0521182	3.83105	0.000127595	0.00287979	Yes	OK	3298.96	3060.7	3537.23	3106.68	3014.72	3463.6	3610.85
ENSG00000115963	RND3	390	Rho family GTPase 3	chr2:150468192-150487695	-	0.335786	0.0876518	3.8309	0.000127673	0.00287979	Yes	OK	17635	15195.8	20074.3	14922.5	15469	21494.9	18653.7
ENSG00000153904	DDAH1	23576	dimethylarginine dimethylaminohydrolase 1	chr1:85318484-85578363	-	-0.260009	0.0678969	-3.82947	0.000128418	0.00289183	Yes	OK	1592.27	1750.83	1433.71	1726.7	1774.97	1360.38	1507.03
ENSG00000196159	FAT4	79633	FAT atypical cadherin 4	chr4:125316411-125492932	+	-0.376295	0.0983239	-3.8271	0.000129664	0.0029151	Yes	OK	471.019	550.207	391.831	564.1	536.315	363.032	420.629
ENSG00000148834	GSTO1	9446	glutathione S-transferase omega 1	chr10:104254709-104267464	+	0.167396	0.0437643	3.82496	0.000130794	0.0029357	Yes	OK	7561.89	7106.13	8017.64	7151.69	7060.57	8221.5	7813.79
ENSG00000153044	CENPH	64946	centromere protein H	chr5:69189547-69210357	+	-0.408438	0.106807	-3.82408	0.000131261	0.00294136	Yes	OK	321.031	382.878	259.184	365.977	399.778	275.234	243.134
ENSG00000183044	ABAT	18	4-aminobutyrate aminotransferase	chr16:8712968-8784575	+	-0.444509	0.116306	-3.8219	0.000132429	0.00296269	Yes	OK	170.685	213.794	127.576	209.13	218.458	129.232	125.921
ENSG00000197046	SIGLEC15	284266	sialic acid binding Ig like lectin 15	chr18:45825579-45842556	+	0.450274	0.117994	3.81607	0.000135596	0.00302861	Yes	OK	163.723	118.371	209.075	141.713	95.0293	207.165	210.984
ENSG00000116183	PAPPA2	60676	pappalysin 2	chr1:176463170-176691205	+	0.404698	0.106089	3.81471	0.000136342	0.00304033	Yes	OK	404.304	325.339	483.269	279.298	371.379	507.061	459.477
ENSG00000132383	RPA1	6117	replication protein A1	chr17:1829978-1899554	+	-0.204201	0.0535772	-3.81135	0.000138212	0.00307701	Yes	OK	3129.69	3364.49	2894.89	3319.94	3409.04	2810.54	2979.23
ENSG00000160446	ZDHHC12	84885	zinc finger DHHC-type containing 12	chr9:128720869-128724129	-	-0.388417	0.10208	-3.80502	0.000141791	0.00315158	Yes	OK	439.917	518.768	361.067	518.697	518.838	321.599	400.535
ENSG00000174136	RGMB	285704	repulsive guidance molecule family member b	chr5:98769294-98796494	+	0.243331	0.06398	3.80324	0.000142817	0.00316375	Yes	OK	2809.96	2549.77	3070.15	2388.48	2711.07	3215.99	2924.31
ENSG00000184584	TMEM173	340061	transmembrane protein 173	chr5:139475527-139482790	-	-0.222793	0.0585802	-3.80322	0.00014283	0.00316375	Yes	OK	2243.1	2426.62	2059.57	2354.09	2499.16	2075.6	2043.53
ENSG00000153879	CEBPG	1054	CCAAT/enhancer binding protein gamma	chr19:33373668-33382686	+	0.275383	0.0724146	3.80287	0.000143031	0.00316375	Yes	OK	1136.37	1015.26	1257.48	996.118	1034.4	1259.76	1255.19
ENSG00000106683	LIMK1	3984	LIM domain kinase 1	chr7:74093155-74122525	+	0.172339	0.0453572	3.79959	0.000144936	0.00320073	Yes	OK	5175.63	4855.34	5495.92	4935.19	4775.5	5528.35	5463.49
ENSG00000119333	WDR34	89891	WD repeat domain 34	chr9:128633660-128656850	-	-0.295952	0.0779683	-3.79579	0.000147171	0.00324487	Yes	OK	997.646	1114.12	881.17	1070.41	1157.83	847.404	914.936
ENSG00000109670	FBXW7	55294	F-box and WD repeat domain containing 7	chr4:152321257-152382512	-	-0.326436	0.0860216	-3.79482	0.000147751	0.00325241	Yes	OK	731.198	829.533	632.863	879.171	779.896	627.415	638.312
ENSG00000172935	MRGPRF	116535	MAS related GPR family member F	chr11:69004393-69013382	-	-0.28272	0.0747048	-3.7845	0.000154017	0.00338491	Yes	OK	1626.9	1808.07	1445.73	1805.12	1811.02	1310.07	1581.38
ENSG00000109323	MANBA	4126	mannosidase beta	chr4:102631485-102760994	-	0.219624	0.0580587	3.78278	0.000155084	0.00340291	Yes	OK	2238.47	2055.58	2421.36	2012.87	2098.29	2445.54	2397.18
ENSG00000156535	CD109	135228	CD109 molecule	chr6:73696084-73828317	+	0.168162	0.0444803	3.7806	0.000156448	0.00342737	Yes	OK	9916.3	9318.31	10514.3	9163.19	9473.44	10184.6	10843.9
ENSG00000187951	LOC100288637	100288637	OTU deubiquitinase 7A pseudogene	chr15:30646114-30773006	+	-0.44036	0.116638	-3.77544	0.000159724	0.00349356	Yes	OK	167.081	209.283	124.879	207.754	210.812	131.205	118.553
ENSG00000187951	ARHGAP11B	89839	Rho GTPase activating protein 11B	chr15:30626675-30638810	+	-0.44036	0.116638	-3.77544	0.000159724	0.00349356	Yes	OK	167.081	209.283	124.879	207.754	210.812	131.205	118.553
ENSG00000104687	GSR	2936	glutathione-disulfide reductase	chr8:30678062-30727969	-	0.18706	0.0495736	3.77338	0.000161049	0.00351691	Yes	OK	3616.5	3370.11	3862.89	3326.81	3413.41	3883.85	3841.93
ENSG00000100297	MCM5	4174	minichromosome maintenance complex component 5	chr22:35400122-35424502	+	-0.271574	0.0720385	-3.76985	0.000163348	0.00356145	Yes	OK	1167.23	1289.34	1045.13	1260.28	1318.4	1025.96	1064.3
ENSG00000169926	KLF13	51621	Kruppel like factor 13	chr15:31326854-31435665	+	0.189975	0.0504297	3.76713	0.000165135	0.00359471	Yes	OK	3738	3482.04	3993.95	3533.19	3430.89	3907.53	4080.37
ENSG00000165434	PGM2L1	283209	phosphoglucomutase 2 like 1	chr11:74330311-74398465	-	0.261427	0.0694327	3.76518	0.000166428	0.0036171	Yes	OK	1561.27	1405.96	1716.58	1480.42	1331.5	1772.74	1660.41
ENSG00000163702	IL17RC	84818	interleukin 17 receptor C	chr3:9917073-9933621	+	0.255132	0.0678348	3.76108	0.000169181	0.00367112	Yes	OK	1412.69	1276.95	1548.44	1304.31	1249.58	1520.2	1576.69
ENSG00000181019	NQO1	1728	NAD(P)H quinone dehydrogenase 1	chr16:69709400-69726630	-	-0.149685	0.0398607	-3.75521	0.000173197	0.0037507	Yes	OK	21198.1	22330	20066.2	22681	21979.1	20263.7	19868.7
ENSG00000123933	MIR4800	100616358	microRNA 4800	chr4:2250076-2250156	-	-0.241893	0.0644203	-3.75492	0.000173396	0.0037507	Yes	OK	2130.22	2326.64	1933.81	2380.23	2273.06	1822.07	2045.54
ENSG00000123933	MXD4	10608	MAX dimerization protein 4	chr4:2247432-2262012	-	-0.241893	0.0644203	-3.75492	0.000173396	0.0037507	Yes	OK	2130.22	2326.64	1933.81	2380.23	2273.06	1822.07	2045.54
ENSG00000142910	TINAGL1	64129	tubulointerstitial nephritis antigen like 1	chr1:31578144-31587686	+	-0.317562	0.0846054	-3.75345	0.000174414	0.00376296	Yes	OK	899.131	1016.03	782.236	982.36	1049.69	717.186	847.287
ENSG00000171604	CXXC5	51523	CXXC finger protein 5	chr5:139648924-139683885	+	0.22922	0.0610713	3.75332	0.000174511	0.00376296	Yes	OK	3056.58	2798.43	3314.73	2824.63	2772.23	3095.64	3533.82
ENSG00000187240	DYNC2H1	79659	dynein cytoplasmic 2 heavy chain 1	chr11:103109430-103479863	+	-0.24243	0.0647145	-3.74614	0.000179575	0.00386607	Yes	OK	1683.36	1838.46	1528.26	1861.53	1815.39	1475.81	1580.71
ENSG00000114767	RRP9	9136	ribosomal RNA processing 9, small subunit (SSU) processome component, homolog (yeast)	chr3:51933425-51941941	-	0.30545	0.0816021	3.74316	0.000181718	0.00390609	Yes	OK	847.888	745.391	950.386	762.223	728.558	913.5	987.273
ENSG00000109084	TMEM97	27346	transmembrane protein 97	chr17:28319094-28328685	+	-0.367584	0.0982307	-3.74204	0.000182529	0.00391738	Yes	OK	489.791	568.062	411.519	520.073	616.052	425.182	397.856
ENSG00000145685	LHFPL2	10184	lipoma HMGIC fusion partner-like 2	chr5:78485214-78648825	-	0.192684	0.0515079	3.74086	0.000183394	0.00392825	Yes	OK	4969.35	4618.64	5320.05	4662.77	4574.51	5569.78	5070.32
ENSG00000138814	PPP3CA	5530	protein phosphatase 3 catalytic subunit alpha	chr4:101023429-101347471	-	0.197479	0.0527939	3.74056	0.000183608	0.00392825	Yes	OK	3136.81	2908.94	3364.69	2837.01	2980.86	3398.5	3330.87
ENSG00000159348	CYB5R1	51706	cytochrome b5 reductase 1	chr1:202961872-202967276	-	0.194348	0.0520209	3.73595	0.000187004	0.00399466	Yes	OK	3226.41	2997.53	3455.3	2938.82	3056.23	3414.28	3496.31
ENSG00000125037	EMC3	55831	ER membrane protein complex subunit 3	chr3:9962679-10011248	-	0.182919	0.0489726	3.73513	0.000187617	0.00400151	Yes	OK	3858.83	3603.65	4114.02	3663.9	3543.39	4142.32	4085.73
ENSG00000072501	SMC1A	8243	structural maintenance of chromosomes 1A	chrX:53374148-53422728	-	-0.172721	0.0463615	-3.72553	0.000194905	0.00415052	Yes	OK	4530.96	4813.37	4248.54	4776.96	4849.77	4208.41	4288.68
ENSG00000162733	DDR2	4921	discoidin domain receptor tyrosine kinase 2	chr1:162632437-162780457	+	-0.177738	0.0477492	-3.72233	0.000197395	0.00419078	Yes	OK	7426.34	7901.59	6951.08	7546.56	8256.63	6886.76	7015.4
ENSG00000255302	EID1	23741	EP300 interacting inhibitor of differentiation 1	chr15:48878092-48880183	+	0.178998	0.0480879	3.72231	0.000197407	0.00419078	Yes	OK	4455.39	4169.21	4741.58	4244.51	4093.91	4655.3	4827.86
ENSG00000120820	GLT8D2	83468	glycosyltransferase 8 domain containing 2	chr12:103988982-104064177	-	-0.38889	0.104507	-3.72118	0.000198292	0.00420306	Yes	OK	342.717	404.487	280.947	411.38	397.594	293.977	267.917
ENSG00000121281	ADCY7	113	adenylate cyclase 7	chr16:50287911-50318134	+	-0.218335	0.0586897	-3.72016	0.000199099	0.0042088	Yes	OK	2767.47	2991.41	2543.52	2874.16	3108.66	2453.43	2633.62
ENSG00000179218	CALR	811	calreticulin	chr19:12938599-12944490	+	-0.160716	0.0432025	-3.72006	0.000199177	0.0042088	Yes	OK	30801.5	32572.9	29030	31652.9	33492.9	29510.2	28549.9
ENSG00000176407	KCMF1	56888	potassium channel modulatory factor 1	chr2:84971107-85059472	+	0.208504	0.0560575	3.71946	0.000199651	0.004211	Yes	OK	2517.99	2324.46	2711.52	2274.29	2374.64	2684.27	2738.78
ENSG00000114861	FOXP1	27086	forkhead box P1	chr3:70954713-71583989	-	0.198996	0.0535059	3.71915	0.000199895	0.004211	Yes	OK	3153.21	2925.82	3380.6	2969.09	2882.56	3288.99	3472.2
ENSG00000233016	SNHG7	84973	small nucleolar RNA host gene 7	chr9:136725231-136728184	-	0.296222	0.0796837	3.71748	0.000201223	0.00423247	Yes	OK	884.942	780.06	989.823	759.471	800.649	1013.14	966.51
ENSG00000168476	REEP4	80346	receptor accessory protein 4	chr8:22138013-22141951	-	-0.322386	0.0867789	-3.71503	0.000203177	0.00426703	Yes	OK	690.426	782.45	598.403	777.357	787.542	569.211	627.595
ENSG00000136859	ANGPTL2	23452	angiopoietin like 2	chr9:127087348-127122765	-	-0.247584	0.0666663	-3.71378	0.000204183	0.00428152	Yes	OK	1430.53	1564.74	1296.32	1547.84	1581.64	1278.51	1314.13
ENSG00000164161	HHIP	64399	hedgehog interacting protein	chr4:144645995-144738729	+	-0.430665	0.115976	-3.7134	0.000204491	0.00428152	Yes	OK	178.473	221.582	135.364	210.506	232.658	138.11	132.619
ENSG00000145555	MYO10	4651	myosin X	chr5:16661906-16936276	-	-0.191493	0.0516137	-3.71012	0.000207157	0.0043251	Yes	OK	4262.78	4562.08	3963.47	4511.43	4612.74	3799.01	4127.93
ENSG00000131435	PDLIM4	8572	PDZ and LIM domain 4	chr5:132257657-132273454	+	0.210913	0.0568488	3.71007	0.000207203	0.0043251	Yes	OK	3888.61	3590.14	4187.07	3739.57	3440.72	3992.37	4381.78
ENSG00000164985	PSIP1	11168	PC4 and SFRS1 interacting protein 1	chr9:15470643-15510289	-	-0.252421	0.0680682	-3.70835	0.000208613	0.00434791	Yes	OK	1325.93	1453.13	1198.73	1461.16	1445.1	1202.54	1194.91
ENSG00000156113	KCNMA1	3778	potassium calcium-activated channel subfamily M alpha 1	chr10:76884876-77637819	-	0.183098	0.0493808	3.70789	0.000208995	0.00434924	Yes	OK	5280.45	4929.82	5631.08	4772.84	5086.8	5471.13	5791.02
ENSG00000165030	NFIL3	4783	nuclear factor, interleukin 3 regulated	chr9:91409044-91424626	-	0.317156	0.0856014	3.70504	0.000211361	0.00439182	Yes	OK	692.144	602.968	781.319	615.007	590.929	780.322	782.317
ENSG00000004478	FKBP4	2288	FK506 binding protein 4	chr12:2794941-2805421	+	0.170692	0.0460777	3.70444	0.000211858	0.0043955	Yes	OK	4859.15	4561.9	5156.41	4604.98	4518.81	5084.43	5228.39
ENSG00000134775	FHOD3	80206	formin homology 2 domain containing 3	chr18:36297695-36780220	+	-0.201064	0.0542867	-3.70374	0.000212445	0.00440102	Yes	OK	3094.81	3324.56	2865.07	3446.51	3202.6	2848.03	2882.11
ENSG00000197063	MAFG	4097	MAF bZIP transcription factor G	chr17:81918268-81923568	-	0.210009	0.0567313	3.70183	0.000214053	0.00442763	Yes	OK	3226.98	2974.17	3479.78	2865.9	3082.44	3610.59	3348.96
ENSG00000186310	NAP1L3	4675	nucleosome assembly protein 1 like 3	chrX:93670925-93673683	-	-0.356115	0.0962389	-3.70032	0.000215326	0.00444725	Yes	OK	481.479	556.562	406.397	583.362	529.761	399.533	413.262
ENSG00000094916	MIR3198-2	100616400	microRNA 3198-2	chr12:54231396-54231476	-	-0.187882	0.0508544	-3.69452	0.000220305	0.00454325	Yes	OK	4657.97	4978.94	4337.01	4979.22	4978.66	4148.24	4525.78
ENSG00000094916	CBX5	23468	chromobox 5	chr12:54230945-54280131	-	-0.187882	0.0508544	-3.69452	0.000220305	0.00454325	Yes	OK	4657.97	4978.94	4337.01	4979.22	4978.66	4148.24	4525.78
ENSG00000170801	HTRA3	94031	HtrA serine peptidase 3	chr4:8269764-8307111	+	0.288442	0.0781184	3.69237	0.000222172	0.00457488	Yes	OK	1177.97	1046.18	1309.77	1084.17	1008.18	1218.33	1401.2
ENSG00000165169	DYNLT3	6990	dynein light chain Tctex-type 3	chrX:37838835-37847636	-	0.200377	0.0542889	3.69094	0.000223428	0.00459383	Yes	OK	3336.08	3088.73	3583.44	3044.76	3132.69	3718.12	3448.76
ENSG00000147224	PRPS1	5631	phosphoribosyl pyrophosphate synthetase 1	chrX:107628423-107651026	+	-0.219876	0.0596892	-3.68368	0.000229888	0.00471958	Yes	OK	2583.68	2793.53	2373.82	2649.89	2937.17	2335.05	2412.59
ENSG00000136048	DRAM1	55332	DNA damage regulated autophagy modulator 1	chr12:101877326-101923623	+	-0.239325	0.0650541	-3.67886	0.000234276	0.00480248	Yes	OK	1512.79	1649.4	1376.17	1659.28	1639.53	1371.24	1381.11
ENSG00000182628	SKA2	348235	spindle and kinetochore associated complex subunit 2	chr17:59109946-59155439	-	-0.297287	0.0810319	-3.66876	0.000243728	0.00498878	Yes	OK	900.726	1008.93	792.522	1019.51	998.354	745.795	839.249
ENSG00000198467	TPM2	7169	tropomyosin 2 (beta)	chr9:35681992-35690056	-	-0.171031	0.046686	-3.66343	0.000248863	0.0050863	Yes	OK	13965.3	14831.1	13099.5	15072.5	14589.7	12526.6	13672.5
ENSG00000079819	EPB41L2	2037	erythrocyte membrane protein band 4.1 like 2	chr6:130839347-131063322	-	-0.192138	0.0525763	-3.65447	0.000257718	0.00525945	Yes	OK	2945.69	3151.38	2740	3112.18	3190.58	2755.3	2724.71
ENSG00000109971	HSPA8	3312	heat shock protein family A (Hsp70) member 8	chr11:123057491-123062335	-	0.152504	0.0417422	3.65348	0.000258712	0.00527189	Yes	OK	33109.3	31300.6	34918	31146.6	31454.7	35810	34026.1
ENSG00000143344	RGL1	23179	ral guanine nucleotide dissociation stimulator like 1	chr1:183805080-183928551	+	-0.313203	0.0858701	-3.64741	0.0002649	0.00538882	Yes	OK	684.17	772.215	596.126	778.733	765.696	580.062	612.19
ENSG00000260916	CCPG1	9236	cell cycle progression 1	chr15:55355222-55408376	-	0.208956	0.0572993	3.64674	0.000265592	0.00538882	Yes	OK	2525.6	2329.06	2722.14	2297.68	2360.44	2804.62	2639.65
ENSG00000260916	MIR628	693213	microRNA 628	chr15:55372939-55373034	-	0.208956	0.0572993	3.64674	0.000265592	0.00538882	Yes	OK	2525.6	2329.06	2722.14	2297.68	2360.44	2804.62	2639.65
ENSG00000101236	RNF24	11237	ring finger protein 24	chr20:3927308-4015591	-	0.228322	0.0626107	3.6467	0.000265629	0.00538882	Yes	OK	2168.98	1981.44	2356.53	1939.95	2022.92	2467.24	2245.81
ENSG00000149636	DSN1	79980	DSN1 homolog, MIS12 kinetochore complex component	chr20:36751790-36773827	-	-0.31777	0.0874956	-3.63184	0.000281405	0.00570043	Yes	OK	638.228	722.022	554.433	720.947	723.097	543.562	565.304
ENSG00000023902	PLEKHO1	51177	pleckstrin homology domain containing O1	chr1:150150585-150160065	+	0.231555	0.0637979	3.62951	0.000283959	0.00573068	Yes	OK	1733.06	1583.43	1882.69	1580.86	1586.01	1827	1938.38
ENSG00000137501	SYTL2	54843	synaptotagmin like 2	chr11:85694220-85719350	-	-0.415255	0.114411	-3.62949	0.000283983	0.00573068	Yes	OK	202.815	248.448	157.182	238.023	258.873	150.935	163.429
ENSG00000127481	UBR4	23352	ubiquitin protein ligase E3 component n-recognin 4	chr1:19074505-19210252	-	0.144478	0.0398084	3.62934	0.000284152	0.00573068	Yes	OK	12344.6	11708.6	12980.7	11588.8	11828.4	12850.2	13111.2
ENSG00000182718	ANXA2	302	annexin A2	chr15:60347150-60397986	-	-0.151556	0.0417701	-3.62834	0.000285253	0.00574444	Yes	OK	27516	29008.3	26023.7	28484.3	29532.3	25496.1	26551.2
ENSG00000171621	SPSB1	80176	splA/ryanodine receptor domain and SOCS box containing 1	chr1:9292881-9369531	+	0.331515	0.0915644	3.62056	0.000293962	0.00591113	Yes	OK	608.314	522.323	694.304	484.301	560.345	701.402	687.206
ENSG00000166548	TK2	7084	thymidine kinase 2, mitochondrial	chr16:66508002-66549825	-	0.188991	0.0522234	3.61889	0.000295867	0.00594073	Yes	OK	3045.97	2835.51	3256.44	2845.27	2825.76	3297.87	3215
ENSG00000003436	TFPI	7035	tissue factor pathway inhibitor	chr2:187464230-187554505	-	0.197037	0.0544734	3.61711	0.000297907	0.00597295	Yes	OK	3262.11	3024.21	3500	2991.11	3057.32	3632.3	3367.71
ENSG00000148019	CEP78	84131	centrosomal protein 78	chr9:78236061-78271883	+	-0.301062	0.0833087	-3.61381	0.000301729	0.00602482	Yes	OK	774.824	867.984	681.664	865.412	870.556	710.281	653.047
ENSG00000071967	CYBRD1	79901	cytochrome b reductase 1	chr2:171522246-171558133	+	0.151309	0.0418706	3.61374	0.000301812	0.00602482	Yes	OK	8428.28	7969.86	8886.7	7832.74	8106.98	8966.31	8807.09
ENSG00000138138	ATAD1	84896	ATPase family, AAA domain containing 1	chr10:87751511-87818231	-	0.203042	0.0562095	3.61223	0.000303579	0.00605128	Yes	OK	2760.42	2551.91	2968.92	2483.42	2620.41	3044.34	2893.5
ENSG00000103187	COTL1	23406	coactosin like F-actin binding protein 1	chr16:84565597-84618096	-	-0.171514	0.0475065	-3.61032	0.000305818	0.00608706	Yes	OK	6653.24	7068.6	6237.89	7084.27	7052.92	5982.14	6493.63
ENSG00000120156	TEK	7010	TEK receptor tyrosine kinase	chr9:27109140-27230178	+	-0.3776	0.104866	-3.6008	0.000317239	0.00630525	Yes	OK	331.356	390.041	272.671	382.487	397.594	265.369	279.973
ENSG00000110917	MLEC	9761	malectin	chr12:120688309-120701864	+	-0.143612	0.0399356	-3.59608	0.000323044	0.00641133	Yes	OK	10649.3	11195.6	10103	11147.2	11244	9992.27	10213.7
ENSG00000088340	FER1L4	80307	fer-1 like family member 4, pseudogene	chr20:35558736-35607562	-	-0.421465	0.117253	-3.59451	0.000325007	0.00644097	Yes	OK	86.2362	114.606	57.8664	121.075	108.137	62.1496	53.5833
ENSG00000164323	CFAP97	57587	cilia and flagella associated protein 97	chr4:185169025-185204028	-	0.177616	0.0494823	3.5895	0.000331318	0.00655655	Yes	OK	3544	3316	3771.99	3315.81	3316.2	3753.64	3790.35
ENSG00000111247	RAD51AP1	10635	RAD51 associated protein 1	chr12:4538783-4560047	+	-0.376885	0.105027	-3.58848	0.000332614	0.00657272	Yes	OK	357.89	422.048	293.733	433.394	410.701	269.315	318.151
ENSG00000134107	BHLHE40	8553	basic helix-loop-helix family member e40	chr3:4979411-4985180	+	0.167463	0.0466926	3.5865	0.000335141	0.00661312	Yes	OK	5619.39	5277.21	5961.57	5213.11	5341.3	6130.12	5793.03
ENSG00000109674	NEIL3	55247	nei like DNA glycosylase 3	chr4:177309836-177362938	+	-0.409185	0.114122	-3.58549	0.000336445	0.00662933	Yes	OK	214.575	261.172	167.979	244.902	277.442	178.557	157.401
ENSG00000187720	THSD4	79875	thrombospondin type 1 domain containing 4	chr15:71141448-71783383	+	-0.349659	0.0975726	-3.58358	0.00033892	0.00666851	Yes	OK	485.463	560.663	410.263	548.966	572.36	379.803	440.723
ENSG00000010610	CD4	920	CD4 molecule	chr12:6789471-6820810	+	-0.324111	0.0904961	-3.5815	0.000341631	0.00671221	Yes	OK	586.666	666.772	506.559	661.786	671.759	487.331	525.787
ENSG00000172667	ZMAT3	64393	zinc finger matrin-type 3	chr3:179017224-179071868	-	-0.178199	0.0497699	-3.58045	0.000342999	0.00672945	Yes	OK	4498.21	4791.65	4204.77	4809.99	4773.31	4052.55	4357
ENSG00000154736	ADAMTS5	11096	ADAM metallopeptidase with thrombospondin type 1 motif 5	chr21:26917911-26967120	-	-0.200792	0.0560905	-3.57979	0.000343869	0.00673688	Yes	OK	2450.33	2632.4	2268.26	2681.54	2583.27	2251.19	2285.33
ENSG00000145390	USP53	54532	ubiquitin specific peptidase 53	chr4:119212626-119295518	+	0.242057	0.0676786	3.57657	0.000348132	0.00681068	Yes	OK	1451.91	1317.16	1586.66	1286.42	1347.89	1624.77	1548.56
ENSG00000197415	VEPH1	79674	ventricular zone expressed PH domain containing 1	chr3:157259742-157503347	-	-0.262714	0.07349	-3.57483	0.000350459	0.00684642	Yes	OK	1120.13	1233.12	1007.14	1234.14	1232.1	1041.74	972.538
ENSG00000152229	PSTPIP2	9050	proline-serine-threonine phosphatase interacting protein 2	chr18:45983535-46072284	-	-0.370495	0.103754	-3.5709	0.000355753	0.00693998	Yes	OK	348.053	407.559	288.546	393.494	421.624	287.072	290.02
ENSG00000178295	GEN1	348654	GEN1, Holliday junction 5' flap endonuclease	chr2:17754159-17785913	+	-0.326031	0.0913773	-3.56796	0.000359769	0.00700834	Yes	OK	614.474	698.438	530.51	730.578	666.297	559.346	501.674
ENSG00000100994	PYGB	5834	phosphorylase, glycogen; brain	chr20:25248069-25298012	+	0.154404	0.0433008	3.56585	0.000362678	0.00705499	Yes	OK	8423.7	7955.85	8891.55	7739.18	8172.52	8821.29	8961.81
ENSG00000144567	FAM134A	79137	family with sequence similarity 134 member A	chr2:219178189-219185475	+	0.167184	0.0469075	3.56412	0.000365082	0.00709168	Yes	OK	4735.58	4448.97	5022.18	4351.83	4546.11	4986.76	5057.6
ENSG00000143384	MCL1	4170	BCL2 family apoptosis regulator	chr1:150574550-150579738	-	0.181682	0.0510436	3.55936	0.000371764	0.00721128	Yes	OK	11401.6	10645.1	12158.1	10728.9	10561.4	12889.6	11426.6
ENSG00000165480	SKA3	221150	spindle and kinetochore associated complex subunit 3	chr13:21153594-21176602	-	-0.37696	0.105935	-3.55842	0.000373091	0.0072268	Yes	OK	332.529	391.333	273.725	363.225	419.44	278.193	269.256
ENSG00000058272	PPP1R12A	4659	protein phosphatase 1 regulatory subunit 12A	chr12:79773562-79934951	-	-0.17749	0.0498992	-3.55697	0.000375151	0.00724807	Yes	OK	5493.04	5849.3	5136.77	5788.22	5910.39	4907.84	5365.7
ENSG00000124145	SDC4	6385	syndecan 4	chr20:45325288-45348424	-	0.158249	0.0444905	3.55691	0.000375247	0.00724807	Yes	OK	5419.83	5110.41	5729.25	5083.78	5137.04	5792.73	5665.77
ENSG00000150630	VEGFC	7424	vascular endothelial growth factor C	chr4:176683533-176792745	-	0.194688	0.0547596	3.55532	0.000377525	0.00728182	Yes	OK	3088.41	2865.62	3311.2	2755.84	2975.4	3351.14	3271.26
ENSG00000135480	KRT7	3855	keratin 7	chr12:52233169-52248925	+	-0.381215	0.107289	-3.55317	0.000380617	0.00733116	Yes	OK	401.973	578.749	225.197	565.476	592.022	165.732	284.662
ENSG00000073060	SCARB1	949	scavenger receptor class B member 1	chr12:124777627-124863973	-	-0.330585	0.0930994	-3.55088	0.00038394	0.00738478	Yes	OK	702.809	803.576	602.043	839.271	767.88	537.643	666.443
ENSG00000271122	LOC101930085	101930085	uncharacterized LOC101930085	chr7:35695205-35699412	+	0.390861	0.110246	3.54534	0.000392113	0.00753142	Yes	OK	268.673	215.411	321.934	203.626	227.197	334.424	309.444
ENSG00000164366	CCDC127	133957	coiled-coil domain containing 127	chr5:204759-218182	-	0.259312	0.0731971	3.54265	0.000396128	0.0075979	Yes	OK	1116.32	1005.09	1227.55	1014	996.169	1200.57	1254.52
ENSG00000198324	FAM109A	144717	family with sequence similarity 109 member A	chr12:111360650-111369121	-	0.303085	0.0857723	3.53361	0.000409933	0.00785171	Yes	OK	795.307	698.501	892.112	747.089	649.913	859.242	924.982
ENSG00000163754	GYG1	2992	glycogenin 1	chr3:148991407-149027669	+	0.205716	0.0582871	3.52936	0.000416561	0.00796754	Yes	OK	2115.59	1954.56	2276.63	1944.08	1965.03	2269.94	2283.32
ENSG00000141425	RPRD1A	55197	regulation of nuclear pre-mRNA domain containing 1A	chr18:35989823-36067594	-	0.185966	0.052723	3.52723	0.000419927	0.00802073	Yes	OK	2995.16	2791.75	3198.57	2754.46	2829.03	3162.72	3234.42
ENSG00000115163	CENPA	1058	centromere protein A	chr2:26786013-26794587	+	-0.416707	0.118161	-3.52659	0.000420943	0.00802895	Yes	OK	110.3	143.998	76.6024	130.706	157.29	64.1226	89.0823
ENSG00000178038	ALS2CL	259173	ALS2 C-terminal like	chr3:46668994-46693656	-	-0.357188	0.101315	-3.52552	0.000422654	0.00805039	Yes	OK	409.304	475.722	342.887	509.066	442.378	350.208	335.566
ENSG00000112208	BAG2	9532	BCL2 associated athanogene 2	chr6:57172305-57185214	+	0.212186	0.0602656	3.52086	0.000430157	0.00818194	Yes	OK	2266.93	2090.41	2443.45	2160.09	2020.74	2374.51	2512.39
ENSG00000154556	SORBS2	8470	sorbin and SH3 domain containing 2	chr4:185585443-185956716	-	0.286094	0.0813462	3.51699	0.000436473	0.00829057	Yes	OK	946.674	839.621	1053.73	839.271	839.972	983.541	1123.91
ENSG00000107372	ZFAND5	7763	zinc finger AN1-type containing 5	chr9:72351424-72364592	-	0.15891	0.0452252	3.51375	0.000441835	0.00837599	Yes	OK	5071.65	4782.71	5360.6	4792.1	4773.31	5294.55	5426.65
ENSG00000196878	MIR4260	100422894	microRNA 4260	chr1:209623443-209623510	-	0.222455	0.0633181	3.5133	0.000442577	0.00837599	Yes	OK	1721.38	1576.73	1866.03	1542.33	1611.13	1890.14	1841.93
ENSG00000196878	LAMB3	3914	laminin subunit beta 3	chr1:209614872-209651334	-	0.222455	0.0633181	3.5133	0.000442577	0.00837599	Yes	OK	1721.38	1576.73	1866.03	1542.33	1611.13	1890.14	1841.93
ENSG00000111897	SERINC1	57515	serine incorporator 1	chr6:122443347-122471881	-	0.139095	0.0395926	3.51317	0.000442802	0.00837599	Yes	OK	14809.7	14073.2	15546.2	13903	14243.5	15695.2	15397.2
ENSG00000107796	ACTA2	59	actin, alpha 2, smooth muscle, aorta	chr10:88935073-88952823	-	-0.298279	0.0850262	-3.50808	0.000451345	0.00852583	Yes	OK	1002.53	1125.7	879.371	1097.93	1153.46	788.214	970.528
ENSG00000110031	LPXN	9404	leupaxin	chr11:58526870-58578239	-	-0.223137	0.0636225	-3.50721	0.000452838	0.00854225	Yes	OK	1912.49	2070.64	1754.35	2058.28	2083	1834.89	1673.81
ENSG00000167601	AXL	558	AXL receptor tyrosine kinase	chr19:41219198-41261767	+	-0.158617	0.0452466	-3.50562	0.000455551	0.00858163	Yes	OK	9242.6	9772.02	8713.19	9628.23	9915.82	8406.96	9019.42
ENSG00000157873	TNFRSF14	8764	TNF receptor superfamily member 14	chr1:2556364-2565622	+	-0.313073	0.0893898	-3.50234	0.000461193	0.008676	Yes	OK	692.527	781.704	603.351	796.619	766.788	650.104	556.597
ENSG00000118985	ELL2	22936	elongation factor for RNA polymerase II 2	chr5:95885097-95962071	-	-0.16458	0.0470355	-3.49905	0.000466919	0.00877168	Yes	OK	4453.57	4719.77	4187.37	4759.08	4680.47	4123.57	4251.17
ENSG00000100596	SPTLC2	9517	serine palmitoyltransferase long chain base subunit 2	chr14:77505996-77616767	-	-0.193507	0.0553574	-3.4956	0.000472999	0.00887375	Yes	OK	2749.52	2944.82	2554.23	2867.28	3022.37	2509.66	2598.79
ENSG00000133639	BTG1	694	BTG anti-proliferation factor 1	chr12:92140277-92145897	-	0.228858	0.0655608	3.49078	0.000481617	0.00902307	Yes	OK	1742.23	1590.08	1894.37	1571.23	1608.94	1976.95	1811.79
ENSG00000103489	XYLT1	64131	xylosyltransferase 1	chr16:17102323-17470881	-	-0.20026	0.0574016	-3.48876	0.000485269	0.00907909	Yes	OK	2980.81	3203.46	2758.16	3198.86	3208.06	2620.15	2896.18
ENSG00000255248	MIR100HG	399959	mir-100-let-7a-2 cluster host gene	chr11:122089102-122105616	-	0.172849	0.0495636	3.48742	0.000487701	0.00911217	Yes	OK	7064.05	6619.48	7508.62	6748.56	6490.39	7856.49	7160.74
ENSG00000185480	PARPBP	55010	PARP1 binding protein	chr12:102120170-102197520	+	-0.367768	0.105504	-3.48582	0.000490627	0.00915436	Yes	OK	342.814	402.014	283.613	371.481	432.547	277.207	290.02
ENSG00000162745	OLFML2B	25903	olfactomedin like 2B	chr1:161983191-162024465	-	-0.384526	0.110357	-3.48439	0.000493256	0.00917845	Yes	OK	261.786	312.294	211.279	295.809	328.78	204.206	218.352
ENSG00000105771	SMG9	56006	SMG9, nonsense mediated mRNA decay factor	chr19:43727996-43755036	-	0.214192	0.0614807	3.48389	0.000494179	0.00918316	Yes	OK	1803	1659.14	1946.87	1668.91	1649.36	1949.33	1944.41
ENSG00000147874	HAUS6	54801	HAUS augmin like complex subunit 6	chr9:19053136-19102942	-	-0.254241	0.0729956	-3.48297	0.000495886	0.00919516	Yes	OK	1168.93	1284.42	1053.43	1260.28	1308.56	1015.11	1091.76
ENSG00000187479	C11orf96	387763	chromosome 11 open reading frame 96	chr11:43942555-43943883	+	0.384143	0.110297	3.48282	0.000496166	0.00919516	Yes	OK	53.4609	31.5188	75.403	30.2688	32.7687	67.0821	83.724
ENSG00000172123	SLFN12	55106	schlafen family member 12	chr17:35410921-35432524	-	-0.351487	0.100975	-3.48094	0.00049965	0.00924723	Yes	OK	388.859	450.773	326.944	447.153	454.393	317.653	336.235
ENSG00000008952	SEC62	7095	SEC62 homolog, preprotein translocation factor	chr3:169966791-169998373	+	0.156152	0.0448919	3.4784	0.000504408	0.00932271	Yes	OK	6926.52	6537.91	7315.13	6699.03	6376.79	7448.08	7182.18
ENSG00000243978	RGAG1	57529	retrotransposon gag domain containing 1	chrX:110419056-110456334	+	-0.351076	0.100953	-3.47763	0.000505866	0.00933707	Yes	OK	36.5234	54.42	18.6269	56.41	52.43	13.811	23.4427
ENSG00000106571	GLI3	2737	GLI family zinc finger 3	chr7:41960949-42237019	-	-0.262968	0.0756615	-3.47558	0.000509753	0.00939617	Yes	OK	1057.72	1167.5	947.938	1174.98	1160.01	906.594	989.282
ENSG00000134250	NOTCH2	4853	notch 2	chr1:119911552-120069703	-	0.152277	0.04391	3.46793	0.000524485	0.00965474	Yes	OK	35917.1	33956.7	37877.6	34184.5	33728.8	36595.2	39160
ENSG00000136156	ITM2B	9445	integral membrane protein 2B	chr13:48233137-48262096	+	0.139131	0.0401264	3.46731	0.000525696	0.00965996	Yes	OK	10207.3	9699.02	10715.5	9603.46	9794.57	10787.4	10643.7
ENSG00000152332	UHMK1	127933	U2AF homology motif kinase 1	chr1:162497804-162529629	+	-0.150111	0.0432963	-3.46706	0.000526177	0.00965996	Yes	OK	6452.34	6800.01	6104.67	6719.67	6880.34	6028.51	6180.84
ENSG00000133612	AGAP3	116988	ArfGAP with GTPase domain, ankyrin repeat and PH domain 3	chr7:151085830-151144436	+	0.195312	0.0563522	3.46592	0.000528419	0.00968816	Yes	OK	2504.78	2325.93	2683.64	2336.2	2315.66	2621.13	2746.15
ENSG00000065548	ZC3H15	55854	zinc finger CCCH-type containing 15	chr2:186486157-186509360	+	0.192018	0.0554151	3.46509	0.00053005	0.00970508	Yes	OK	2518.48	2340.87	2696.09	2316.94	2364.81	2669.47	2722.7
ENSG00000177119	ANO6	196527	anoctamin 6	chr12:45215986-45432351	+	0.172109	0.0496996	3.46298	0.000534222	0.00976844	Yes	OK	5066.79	4752.21	5381.37	4708.17	4796.25	5167.29	5595.44
ENSG00000160209	PDXK	8566	pyridoxal (pyridoxine, vitamin B6) kinase	chr21:43719096-43762307	+	0.176196	0.0509234	3.46002	0.000540134	0.00986338	Yes	OK	3344.24	3131.06	3557.41	3153.46	3108.66	3508	3606.83
ENSG00000160209	LOC105372824	105372824	uncharacterized LOC105372824	NA	NA	0.176196	0.0509234	3.46002	0.000540134	0.00986338	Yes	OK	3344.24	3131.06	3557.41	3153.46	3108.66	3508	3606.83
ENSG00000103495	MAZ	4150	MYC associated zinc finger protein	chr16:29806536-29811183	+	0.188741	0.0546023	3.45666	0.000546922	0.00997406	Yes	OK	4021.12	3743.43	4298.81	3621.25	3865.62	4114.69	4482.92
ENSG00000184007	PTP4A2	8073	protein tyrosine phosphatase type IVA, member 2	chr1:31906420-31919658	-	0.153794	0.0445371	3.45316	0.000554057	0.0100908	Yes	OK	5202.79	4914.6	5490.97	4900.79	4928.42	5520.46	5461.48
ENSG00000157827	FMNL2	114793	formin like 2	chr2:152335236-152649834	+	0.175545	0.0508836	3.44994	0.000560721	0.0101986	Yes	OK	3375.03	3159.15	3590.9	3108.05	3210.24	3562.25	3619.55
ENSG00000268941	LOC79160	79160	uncharacterized LOC79160	chr20:58634771-58635738	+	0.30874	0.0895199	3.44885	0.000562986	0.0102262	Yes	OK	611.11	533.093	689.128	551.717	514.469	681.672	696.583
ENSG00000021826	CPS1	1373	carbamoyl-phosphate synthase 1	chr2:210556598-210679107	+	-0.281152	0.0815378	-3.44812	0.000564513	0.0102404	Yes	OK	880.443	980.647	780.24	978.232	983.062	733.957	826.523
ENSG00000221829	FANCG	2189	Fanconi anemia complementation group G	chr9:35073837-35080016	-	-0.333879	0.0968894	-3.44598	0.00056899	0.0102944	Yes	OK	466.577	533.918	399.237	517.321	550.515	413.344	385.13
ENSG00000138735	PDE5A	8654	phosphodiesterase 5A	chr4:119494394-119627287	-	-0.299983	0.087053	-3.44598	0.000568991	0.0102944	Yes	OK	711.228	798.892	623.564	756.72	841.064	600.779	646.349
ENSG00000137628	DDX60	55601	DEXD/H-box helicase 60	chr4:168216290-168318807	-	-0.364376	0.105811	-3.44364	0.000573931	0.0103701	Yes	OK	318.707	373.572	263.842	360.474	386.671	260.436	267.247
ENSG00000163820	FYCO1	79443	FYVE and coiled-coil domain containing 1	chr3:45917898-45995824	-	0.187848	0.0546955	3.43443	0.000593807	0.0107151	Yes	OK	2813.41	2619.69	3007.14	2568.72	2670.65	2948.65	3065.64
ENSG00000149577	SIDT2	51092	SID1 transmembrane family member 2	chr11:117179222-117197445	+	-0.19736	0.0574715	-3.43405	0.000594645	0.0107161	Yes	OK	2267.22	2431.38	2103.06	2384.35	2478.41	2117.03	2089.08
ENSG00000183508	FAM46C	54855	family with sequence similarity 46 member C	chr1:117605981-117628389	+	-0.401566	0.116954	-3.43355	0.000595738	0.0107217	Yes	OK	183.989	228.078	139.9	231.143	225.012	118.38	161.42
ENSG00000107562	CXCL12	6387	C-X-C motif chemokine ligand 12	chr10:44377061-44385097	-	-0.221009	0.0644077	-3.4314	0.000600471	0.0107927	Yes	OK	2989.39	3240.27	2738.5	3185.1	3295.44	2518.54	2958.47
ENSG00000135451	TROAP	10024	trophinin associated protein	chr12:49323187-49324388	+	-0.393484	0.114919	-3.42401	0.000617048	0.0110762	Yes	OK	192.24	233.539	150.941	231.143	235.935	155.867	146.015
ENSG00000166451	CENPN	55839	centromere protein N	chr16:81006497-81031485	+	-0.330355	0.0965258	-3.42245	0.000620595	0.0111131	Yes	OK	457.959	524.129	391.789	528.328	519.93	385.722	397.856
ENSG00000177311	ZBTB38	253461	zinc finger and BTB domain containing 38	chr3:141324212-141449790	+	0.156962	0.0458647	3.42229	0.000620969	0.0111131	Yes	OK	5680.99	5358.58	6003.4	5213.11	5504.05	5952.55	6054.25
ENSG00000178202	KDELC2	143888	KDEL motif containing 2	chr11:108472105-108498432	-	-0.184506	0.0539171	-3.42204	0.000621537	0.0111131	Yes	OK	2798.27	2987.6	2608.94	2948.46	3026.74	2568.85	2649.03
ENSG00000117143	UAP1	6675	UDP-N-acetylglucosamine pyrophosphorylase 1	chr1:162561439-162599843	+	-0.136438	0.0399071	-3.4189	0.000628745	0.0112274	Yes	OK	9455.41	9915.09	8995.73	9908.9	9921.28	9036.35	8955.12
ENSG00000107815	C10orf2	56652	chromosome 10 open reading frame 2	chr10:100987535-100994401	+	0.316582	0.0926202	3.41807	0.000630675	0.0112472	Yes	OK	538.726	465.986	611.466	462.287	469.685	623.469	599.464
ENSG00000050438	SLC4A8	9498	solute carrier family 4 member 8	chr12:51424809-51474577	+	-0.404521	0.118383	-3.41706	0.000633015	0.0112659	Yes	OK	106.536	136.615	76.4569	127.954	145.275	79.9066	73.0073
ENSG00000205213	LGR4	55366	leucine rich repeat containing G protein-coupled receptor 4	chr11:27365960-27472787	-	-0.188191	0.0550781	-3.41681	0.000633605	0.0112659	Yes	OK	5258.96	5625.25	4892.67	5574.96	5675.54	4576.38	5208.97
ENSG00000143418	CERS2	29956	ceramide synthase 2	chr1:150965172-150975003	-	0.139379	0.0407952	3.41656	0.000634188	0.0112659	Yes	OK	9875.14	9383.26	10367	9258.12	9508.39	10264.5	10469.5
ENSG00000064666	CNN2	1265	calponin 2	chr19:1026274-1039068	+	-0.352327	0.103378	-3.40815	0.000654052	0.0116037	Yes	OK	2665.94	3100.09	2231.79	2980.1	3220.07	2030.22	2433.35
ENSG00000122591	FAM126A	84668	family with sequence similarity 126 member A	chr7:22941258-23014151	-	0.147997	0.0434365	3.4072	0.000656335	0.0116292	Yes	OK	6830.83	6466.58	7195.08	6324.8	6608.36	7192.58	7197.58
ENSG00000181704	YIPF6	286451	Yip1 domain family member 6	chrX:68498781-68537285	+	0.199434	0.0585858	3.40413	0.000663758	0.0117303	Yes	OK	2172.45	2011.02	2333.88	1999.12	2022.92	2380.43	2287.34
ENSG00000109133	TMEM33	55161	transmembrane protein 33	chr4:41935119-41960807	+	0.190109	0.0558554	3.40358	0.000665083	0.0117303	Yes	OK	2430	2260.32	2599.67	2282.54	2238.1	2611.27	2588.08
ENSG00000091164	TXNL1	9352	thioredoxin like 1	chr18:56602821-56638689	-	0.168777	0.0495892	3.40351	0.000665259	0.0117303	Yes	OK	3662.56	3439.56	3885.56	3491.92	3387.19	3858.2	3912.92
ENSG00000144824	PHLDB2	90102	pleckstrin homology like domain family B member 2	chr3:111859179-111976517	+	-0.192715	0.0566238	-3.40343	0.000665465	0.0117303	Yes	OK	2608.8	2795.96	2421.64	2821.88	2770.05	2342.94	2500.33
ENSG00000125885	MCM8	84515	minichromosome maintenance 8 homologous recombination repair factor	chr20:5950651-5995206	+	-0.290013	0.0853129	-3.39941	0.000675326	0.0118889	Yes	OK	793.121	885.214	701.028	836.519	933.909	734.943	667.113
ENSG00000168389	MFSD2A	84879	major facilitator superfamily domain containing 2A	chr1:39955111-39969968	+	0.367816	0.108283	3.39681	0.000681769	0.0119869	Yes	OK	285.6	234.39	336.809	239.399	229.381	337.383	336.235
ENSG00000070669	ASNS	440	asparagine synthetase (glutamine-hydrolyzing)	chr7:97852116-97872542	-	0.251313	0.0740554	3.39358	0.000689844	0.0121133	Yes	OK	1076.82	971.52	1182.11	947.963	995.077	1169.99	1194.24
ENSG00000134247	PTGFRN	5738	prostaglandin F2 receptor inhibitor	chr1:116909922-116990358	+	-0.266987	0.0786969	-3.3926	0.000692332	0.0121415	Yes	OK	957.481	1059.59	855.375	1055.28	1063.89	811.89	898.861
ENSG00000171680	PLEKHG5	57449	pleckstrin homology and RhoGEF domain containing G5	chr1:6466091-6497424	-	-0.21846	0.0644145	-3.39148	0.000695169	0.0121757	Yes	OK	1557.03	1684.68	1429.37	1673.04	1696.33	1431.41	1427.33
ENSG00000169855	ROBO1	6091	roundabout guidance receptor 1	chr3:78597237-79019459	-	-0.240025	0.0708825	-3.38624	0.000708562	0.0123944	Yes	OK	1333.97	1455.18	1212.76	1390.99	1519.38	1242	1183.52
ENSG00000187741	FANCA	2175	Fanconi anemia complementation group A	chr16:89737550-89816657	-	-0.349011	0.103412	-3.37494	0.000738314	0.0128984	Yes	OK	351.639	407.985	295.293	397.622	418.347	299.896	290.69
ENSG00000196576	PLXNB2	23654	plexin B2	chr22:50274978-50307572	-	-0.162991	0.0483696	-3.3697	0.0007525	0.0131223	Yes	OK	16120.3	17074.9	15165.8	17056.5	17093.3	14366.4	15965.2
ENSG00000185201	IFITM2	10581	interferon induced transmembrane protein 2	chr11:308106-309410	+	-0.26171	0.0776701	-3.3695	0.000753047	0.0131223	Yes	OK	939.435	1036.43	842.444	1069.04	1003.82	852.337	832.551
ENSG00000120253	NUP43	348995	nucleoporin 43	chr6:149724315-149746572	-	-0.234525	0.0696168	-3.36879	0.000754989	0.0131395	Yes	OK	1265.2	1379.19	1151.21	1406.12	1352.26	1144.34	1158.07
ENSG00000108010	GLRX3	10539	glutaredoxin 3	chr10:130136408-130179668	+	0.170765	0.0507082	3.3676	0.000758245	0.0131794	Yes	OK	3618.32	3395.1	3841.53	3399.74	3390.47	3748.7	3934.36
ENSG00000184014	DENND5A	23258	DENN domain containing 5A	chr11:9138825-9265326	-	0.176399	0.0524132	3.36554	0.000763926	0.0132614	Yes	OK	4728.09	4420.27	5035.9	4200.48	4640.05	5132.76	4939.04
ENSG00000130522	JUND	3727	JunD proto-oncogene, AP-1 transcription factor subunit	chr19:18279693-18281656	-	0.224503	0.0667929	3.36118	0.000776116	0.0134559	Yes	OK	2751.54	2520.75	2982.32	2583.85	2457.65	2735.57	3229.07
ENSG00000166398	KIAA0355	9710	KIAA0355	chr19:34254550-34355566	+	-0.222096	0.0661664	-3.35662	0.000789006	0.0136622	Yes	OK	1529.3	1657.55	1401.06	1611.12	1703.97	1378.14	1423.98
ENSG00000171488	LRRC8C	84230	leucine rich repeat containing 8 family member C	chr1:89633084-89719535	+	0.281393	0.0838489	3.35596	0.000790907	0.0136778	Yes	OK	791.116	699.867	882.366	675.544	724.189	917.446	847.287
ENSG00000163071	SPATA18	132671	spermatogenesis associated 18	chr4:52051330-52097306	+	-0.264332	0.0788875	-3.35074	0.000805963	0.0139206	Yes	OK	896.554	989.989	803.119	957.594	1022.38	795.12	811.118
ENSG00000128655	PDE11A	50940	phosphodiesterase 11A	chr2:177623248-178072755	-	-0.375064	0.111976	-3.34949	0.000809607	0.013966	Yes	OK	61.6098	84.6627	38.5569	74.2961	95.0293	31.568	45.5458
ENSG00000196531	NACA	4666	nascent polypeptide-associated complex alpha subunit	chr12:56712426-56725542	-	0.139877	0.0418857	3.3395	0.000839305	0.0144488	Yes	OK	10292.6	9777.03	10808.2	9581.45	9972.62	10655.2	10961.1
ENSG00000154813	DPH3	285381	diphthamide biosynthesis 3	chr3:16257060-16264989	-	0.219495	0.0657295	3.33936	0.000839704	0.0144488	Yes	OK	1518.38	1391.97	1644.8	1392.36	1391.58	1676.06	1613.53
ENSG00000108797	CNTNAP1	8506	contactin associated protein 1	chr17:42682613-42699993	+	-0.339398	0.101714	-3.33678	0.000847556	0.0145656	Yes	OK	504.574	583.706	425.442	576.483	590.929	367.965	482.92
ENSG00000154188	ANGPT1	284	angiopoietin 1	chr8:107249481-107498055	-	-0.293815	0.0880895	-3.33542	0.000851701	0.0146186	Yes	OK	859.828	965.98	753.677	963.098	968.862	672.794	834.561
ENSG00000144821	MYH15	22989	myosin heavy chain 15	chr3:108380368-108529322	-	-0.33701	0.101074	-3.3343	0.000855158	0.0146595	Yes	OK	37.0981	54.5827	19.6134	63.2893	45.8762	15.784	23.4427
ENSG00000109685	WHSC1	7468	Wolf-Hirschhorn syndrome candidate 1	chr4:1900625-1948818	+	-0.177633	0.0532851	-3.33364	0.000857188	0.014676	Yes	OK	2962.54	3154.1	2770.97	3180.97	3127.23	2829.28	2712.66
ENSG00000100219	XBP1	7494	X-box binding protein 1	chr22:28794559-28800572	-	0.215897	0.0649649	3.32328	0.000889649	0.0152128	Yes	OK	2624.96	2408.36	2841.56	2219.25	2597.47	2910.18	2772.94
ENSG00000178607	ERN1	2081	endoplasmic reticulum to nucleus signaling 1	chr17:64043029-64130142	-	0.296267	0.0892553	3.31933	0.000902351	0.0154108	Yes	OK	685.111	599.24	770.982	568.228	630.252	811.89	730.073
ENSG00000166436	TRIM66	9866	tripartite motif containing 66	chr11:8612036-8658836	-	-0.386236	0.116388	-3.31851	0.000904985	0.0154365	Yes	OK	177.287	216.304	138.269	222.888	209.72	149.948	126.591
ENSG00000139880	CDH24	64403	cadherin 24	chr14:23047060-23057538	-	-0.356796	0.107547	-3.31758	0.000908019	0.015469	Yes	OK	299.51	351.06	247.961	364.601	337.518	257.477	238.446
ENSG00000126653	NSRP1	84081	nuclear speckle splicing regulatory protein 1	chr17:30116806-30186475	+	0.220261	0.0664218	3.31609	0.00091286	0.0155322	Yes	OK	1770.07	1623.24	1916.9	1707.43	1539.04	1967.08	1866.71
ENSG00000126653	MIR423	494335	microRNA 423	chr17:30117078-30117172	+	0.220261	0.0664218	3.31609	0.00091286	0.0155322	Yes	OK	1770.07	1623.24	1916.9	1707.43	1539.04	1967.08	1866.71
ENSG00000197093	GAL3ST4	79690	galactose-3-O-sulfotransferase 4	chr7:100159241-100168750	-	-0.391298	0.118055	-3.31454	0.000917932	0.0155903	Yes	OK	156.096	195.041	117.151	196.747	193.335	97.6636	136.638
ENSG00000100814	CCNB1IP1	57820	cyclin B1 interacting protein 1	chr14:20311367-20333312	-	0.301462	0.0909564	3.31436	0.000918548	0.0155903	Yes	OK	759.278	661.348	857.207	635.645	687.051	940.135	774.279
ENSG00000177084	POLE	5426	DNA polymerase epsilon, catalytic subunit	chr12:132623761-132687524	-	-0.274958	0.0829944	-3.31298	0.000923088	0.015648	Yes	OK	771.382	856.394	686.371	869.54	843.249	708.308	664.433
ENSG00000144746	ARL6IP5	10550	ADP ribosylation factor like GTPase 6 interacting protein 5	chr3:69084938-69106088	+	0.145026	0.0437809	3.31254	0.000924518	0.0156529	Yes	OK	6536.24	6196.41	6876.07	6119.8	6273.03	6759.5	6992.63
ENSG00000139998	RAB15	376267	RAB15, member RAS oncogene family	chr14:64945813-64972157	-	-0.324298	0.0979253	-3.31169	0.000927349	0.0156794	Yes	OK	442.211	504.988	379.434	485.676	524.3	381.776	377.093
ENSG00000140105	WARS	7453	tryptophanyl-tRNA synthetase	chr14:100333787-100375590	-	0.181593	0.054839	3.31138	0.000928372	0.0156794	Yes	OK	4348.16	4054.67	4641.65	3853.77	4255.57	4796.37	4486.94
ENSG00000132481	TRIM47	91107	tripartite motif containing 47	chr17:75874163-75878575	-	0.374263	0.11319	3.30649	0.000944717	0.0159211	Yes	OK	224.331	180.253	268.408	185.74	174.767	255.504	281.313
ENSG00000167244	IGF2	3481	insulin like growth factor 2	chr11:2129111-2137288	-	0.192456	0.0582069	3.30641	0.000945001	0.0159211	Yes	OK	4536.64	4216.82	4856.45	4234.88	4198.77	4509.3	5203.61
ENSG00000176871	WSB2	55884	WD repeat and SOCS box containing 2	chr12:118032690-118061211	-	-0.153364	0.0464063	-3.30481	0.000950398	0.0159472	Yes	OK	5347.53	5641.97	5053.08	5482.78	5801.16	5031.15	5075.01
ENSG00000147133	TAF1	6872	TATA-box binding protein associated factor 1	chrX:71366238-71466005	+	-0.25361	0.0767432	-3.30466	0.000950933	0.0159472	Yes	OK	1024.43	1126.39	922.457	1173.6	1079.18	946.054	898.861
ENSG00000116786	PLEKHM2	23207	pleckstrin homology and RUN domain containing M2	chr1:15684331-15734769	+	0.149599	0.0452696	3.30463	0.00095103	0.0159472	Yes	OK	5115.94	4839.4	5392.48	4764.58	4914.22	5397.15	5387.81
ENSG00000112378	PERP	64065	PERP, TP53 apoptosis effector	chr6:138088504-138107523	-	-0.157854	0.0477684	-3.30456	0.00095124	0.0159472	Yes	OK	4524.74	4784.38	4265.1	4909.05	4659.71	4265.63	4264.56
ENSG00000147650	LRP12	29967	LDL receptor related protein 12	chr8:104489230-104589024	-	0.167493	0.0506905	3.30423	0.000952368	0.0159472	Yes	OK	4358.41	4089.88	4626.95	3956.96	4222.8	4738.16	4515.74
ENSG00000161091	MFSD12	126321	major facilitator superfamily domain containing 12	chr19:3544198-3557584	-	0.176361	0.053385	3.30356	0.000954657	0.0159661	Yes	OK	3190.74	2986.51	3394.98	2985.6	2987.42	3290.97	3498.99
ENSG00000163840	DTX3L	151636	deltex E3 ubiquitin ligase 3L	chr3:122564337-122575202	+	-0.249112	0.0754349	-3.30234	0.000958802	0.0160123	Yes	OK	1018.09	1116.84	919.34	1139.21	1094.48	939.149	899.53
ENSG00000139354	GAS2L3	283431	growth arrest specific 2 like 3	chr12:100593617-100628288	+	-0.379764	0.115008	-3.30207	0.000959758	0.0160123	Yes	OK	194.563	234.873	154.253	222.888	246.858	159.813	148.694
ENSG00000140199	SLC12A6	9990	solute carrier family 12 member 6	chr15:34229995-34336844	-	0.217133	0.0658144	3.29917	0.000969716	0.0161588	Yes	OK	2029.47	1860.75	2198.19	1834.01	1887.48	2332.09	2064.3
ENSG00000133083	DCLK1	9201	doublecortin like kinase 1	chr13:35768651-36132020	-	-0.379151	0.114986	-3.29738	0.000975925	0.0162425	Yes	OK	222.379	268.492	176.266	231.143	305.841	169.678	182.853
ENSG00000177542	SLC25A22	79751	solute carrier family 25 member 22	chr11:790474-796263	-	0.224729	0.0681939	3.29544	0.000982681	0.0163327	Yes	OK	1448.51	1326.17	1570.85	1357.97	1294.36	1524.14	1617.55
ENSG00000142230	SAE1	10055	SUMO1 activating enzyme subunit 1	chr19:47130822-47210636	+	-0.164274	0.0498536	-3.29514	0.000983728	0.0163327	Yes	OK	3483.46	3691.29	3275.63	3661.15	3721.44	3250.52	3300.73
ENSG00000182117	NOP10	55505	NOP10 ribonucleoprotein	chr15:34341715-34343161	-	0.162623	0.0493607	3.29458	0.000985687	0.0163455	Yes	OK	3737.39	3515.87	3958.91	3453.39	3578.34	3966.72	3951.1
ENSG00000124193	SRSF6	6431	serine and arginine rich splicing factor 6	chr20:43457863-43463604	+	-0.167956	0.0509968	-3.29346	0.000989626	0.0163859	Yes	OK	3622.43	3843.09	3401.76	3904.67	3781.51	3481.36	3322.17
ENSG00000170442	KRT86	3892	keratin 86	chr12:52274644-52309163	+	-0.343495	0.104304	-3.29321	0.000990517	0.0163859	Yes	OK	39.9424	57.1717	22.713	61.9134	52.43	24.6625	20.7635
ENSG00000117519	CNN3	1266	calponin 3	chr1:94896948-94927223	-	-0.157349	0.0477996	-3.29184	0.000995336	0.0164458	Yes	OK	7754.33	8198.75	7309.92	8204.22	8193.27	6977.52	7642.32
ENSG00000138061	CYP1B1	1545	cytochrome P450 family 1 subfamily B member 1	chr2:38067602-38076181	-	-0.286138	0.0869957	-3.2891	0.00100509	0.0165867	Yes	OK	884.23	988.996	779.463	1091.05	886.94	800.052	758.874
ENSG00000107249	GLIS3	169792	GLIS family zinc finger 3	chr9:3824127-4300035	-	0.199381	0.060625	3.28877	0.00100628	0.0165867	Yes	OK	2168.97	2009.88	2328.05	2094.05	1925.71	2304.47	2351.64
ENSG00000048392	RRM2B	50484	ribonucleotide reductase regulatory TP53 inducible subunit M2B	chr8:102204500-102239118	-	-0.161508	0.04915	-3.28603	0.00101611	0.0167286	Yes	OK	4476.34	4737.69	4215	4588.47	4886.91	4160.07	4269.92
ENSG00000128656	CHN1	1123	chimerin 1	chr2:174799313-175005379	-	-0.330632	0.100798	-3.28014	0.00103756	0.0170613	Yes	OK	422.023	485.857	358.188	517.321	454.393	343.302	373.074
ENSG00000159228	CBR1	873	carbonyl reductase 1	chr21:36069923-36073177	+	0.170322	0.0519397	3.27923	0.00104091	0.0170959	Yes	OK	3080.1	2889.14	3271.07	2872.78	2905.49	3236.71	3305.42
ENSG00000101003	GINS1	9837	GINS complex subunit 1	chr20:25407682-25448555	+	-0.343885	0.104893	-3.27843	0.00104385	0.0171207	Yes	OK	339.95	394.368	285.532	371.481	417.255	287.072	283.992
ENSG00000084733	RAB10	10890	RAB10, member RAS oncogene family	chr2:26033859-26137454	+	0.129598	0.0395341	3.27814	0.00104492	0.0171207	Yes	OK	11017.2	10509	11525.4	10595.5	10422.6	11505.6	11545.2
ENSG00000065882	TBC1D1	23216	TBC1 domain family member 1	chr4:37891083-38139175	+	-0.198927	0.0607059	-3.2769	0.00104953	0.0171757	Yes	OK	2127.32	2285.87	1968.77	2249.52	2322.21	1898.03	2039.52
ENSG00000090097	PCBP4	57060	poly(rC) binding protein 4	chr3:51957453-51967434	-	-0.196147	0.0599477	-3.27197	0.00106801	0.0174573	Yes	OK	2270.54	2438.13	2102.94	2471.03	2405.22	2020.35	2185.53
ENSG00000167695	FAM57A	79850	family with sequence similarity 57 member A	chr17:732545-742968	+	0.223032	0.0682525	3.26775	0.00108408	0.0176989	Yes	OK	1348.44	1233.53	1463.35	1232.77	1234.29	1486.66	1440.05
ENSG00000143786	CNIH3	149111	cornichon family AMPA receptor auxiliary protein 3	chr1:224434894-224740549	+	0.332071	0.10173	3.26424	0.00109759	0.0178982	Yes	OK	392.606	333.236	451.976	345.339	321.134	468.588	435.365
ENSG00000198729	PPP1R14C	81706	protein phosphatase 1 regulatory inhibitor subunit 14C	chr6:150143051-150250392	+	0.385415	0.118141	3.26234	0.00110498	0.0179972	Yes	OK	148.36	111.387	185.334	100.437	122.337	203.219	167.448
ENSG00000131871	SELENOS	55829	selenoprotein S	chr15:101270908-101277520	-	0.198181	0.0607591	3.26175	0.00110728	0.0180032	Yes	OK	2103.72	1947.03	2260.41	1939.95	1954.11	2339.98	2180.84
ENSG00000127463	EMC1	23065	ER membrane protein complex subunit 1	chr1:19215663-19251559	-	-0.13868	0.0425213	-3.26142	0.00110856	0.0180032	Yes	OK	6272.04	6583.67	5960.4	6597.22	6570.13	5966.36	5954.45
ENSG00000221823	PPP3R1	5534	protein phosphatase 3 regulatory subunit B, alpha	chr2:68178856-68252519	-	0.169989	0.0521242	3.26123	0.00110928	0.0180032	Yes	OK	3140.53	2945.83	3335.24	2988.35	2903.31	3377.78	3292.7
ENSG00000246363	LOC728084	728084	uncharacterized LOC728084	chr12:89011125-89019692	-	0.385712	0.11829	3.26072	0.0011113	0.0180146	Yes	OK	130.318	97.5706	163.065	93.5581	101.583	166.719	159.41
ENSG00000151917	BEND6	221336	BEN domain containing 6	chr6:56954974-57010946	+	0.262788	0.0806069	3.26012	0.00111366	0.0180292	Yes	OK	861.838	771.705	951.97	752.592	790.819	923.365	980.575
ENSG00000138944	KIAA1644	85352	KIAA1644	chr22:44243676-44312851	-	0.225614	0.0692107	3.25982	0.00111483	0.0180292	Yes	OK	1860.83	1700.37	2021.29	1597.37	1803.37	1922.69	2119.89
ENSG00000139289	PHLDA1	22822	pleckstrin homology like domain family A member 1	chr12:76025446-76031776	-	0.336279	0.103213	3.25812	0.00112154	0.0181164	Yes	OK	22748	19220.2	26275.7	20735.5	17704.9	27723.6	24827.8
ENSG00000158825	CDA	978	cytidine deaminase	chr1:20588950-20618907	+	-0.369422	0.113411	-3.25738	0.00112445	0.0181419	Yes	OK	239.58	285.911	193.249	251.781	320.041	198.287	188.211
ENSG00000135018	UBQLN1	29979	ubiquilin 1	chr9:83659962-83708253	-	0.143662	0.0441167	3.25641	0.00112831	0.0181829	Yes	OK	7353.04	6973.04	7733.03	6803.6	7142.49	7616.77	7849.29
ENSG00000106853	PTGR1	22949	prostaglandin reductase 1	chr9:111549721-111599855	-	0.146967	0.0451478	3.25524	0.00113295	0.0182363	Yes	OK	6360.28	6025.36	6695.21	6198.22	5852.49	6742.73	6647.68
ENSG00000214357	NEURL1B	54492	neuralized E3 ubiquitin protein ligase 1B	chr5:172641265-172691530	+	-0.381443	0.117193	-3.25483	0.00113459	0.0182412	Yes	OK	84.6417	110.358	58.9257	116.948	103.768	56.2305	61.6208
ENSG00000124207	CSE1L	1434	chromosome segregation 1 like	chr20:49046245-49096960	+	-0.145558	0.044729	-3.25423	0.00113702	0.0182589	Yes	OK	6443.44	6782.31	6104.57	6733.43	6831.19	5948.6	6260.54
ENSG00000176783	RUFY1	80230	RUN and FYVE domain containing 1	chr5:179559691-179610026	+	0.201271	0.0618646	3.25342	0.00114025	0.0182893	Yes	OK	2017.83	1868.16	2167.5	1916.56	1819.76	2101.25	2233.76
ENSG00000111445	RFC5	5985	replication factor C subunit 5	chr12:118016700-118032237	+	-0.269362	0.082845	-3.2514	0.00114839	0.0183983	Yes	OK	788.814	874.312	703.315	842.023	906.601	686.605	720.026
ENSG00000213719	CLIC1	1192	chloride intracellular channel 1	chr6_GL000256v2_alt:3029876-3035866	-	0.127009	0.0390783	3.25011	0.00115361	0.0184605	Yes	OK	17940.7	17129.1	18752.3	16994.5	17263.7	18563	18941.7
ENSG00000178695	KCTD12	115207	potassium channel tetramerization domain containing 12	chr13:76880168-76886405	-	0.195429	0.0601368	3.24973	0.00115513	0.0184633	Yes	OK	2110.41	1957.63	2263.2	1926.2	1989.06	2200.88	2325.52
ENSG00000161203	AP2M1	1173	adaptor related protein complex 2 mu 1 subunit	chr3:184174845-184184091	+	-0.131762	0.0405756	-3.24731	0.001165	0.0185993	Yes	OK	20148.1	21097.4	19198.7	20911.6	21283.3	18806.7	19590.7
ENSG00000204178	TMEM57	55219	transmembrane protein 57	chr1:25430857-25500207	+	0.217612	0.0670496	3.24554	0.00117229	0.018694	Yes	OK	1455.46	1335.17	1575.76	1355.22	1315.12	1608.98	1542.53
ENSG00000158669	GPAT4	137964	glycerol-3-phosphate acyltransferase 4	chr8:41578187-41625001	+	0.14819	0.0457389	3.2399	0.00119572	0.0190248	Yes	OK	4680.79	4431.22	4930.35	4423.37	4439.07	4902.91	4957.8
ENSG00000188070	C11orf95	65998	chromosome 11 open reading frame 95	chr11:63759891-63768641	-	0.279702	0.0863312	3.23988	0.00119582	0.0190248	Yes	OK	716.96	635.905	798.015	659.034	612.775	767.498	828.532
ENSG00000164111	ANXA5	308	annexin A5	chr4:121667996-121696992	-	0.126045	0.038909	3.23948	0.00119747	0.019029	Yes	OK	24206.9	23118.6	25295.2	22870.8	23366.3	25408.3	25182.2
ENSG00000103335	PIEZO1	9780	piezo type mechanosensitive ion channel component 1	chr16:88715337-88785220	-	-0.139881	0.0431963	-3.23827	0.00120255	0.0190796	Yes	OK	10051.7	10555.1	9548.25	10258.4	10851.9	9424.04	9672.46
ENSG00000103335	MIR4722	100616167	microRNA 4722	chr16:88716277-88716337	-	-0.139881	0.0431963	-3.23827	0.00120255	0.0190796	Yes	OK	10051.7	10555.1	9548.25	10258.4	10851.9	9424.04	9672.46
ENSG00000164442	CITED2	10370	Cbp/p300 interacting transactivator with Glu/Asp rich carboxy-terminal domain 2	chr6:139372254-139374650	-	-0.252475	0.0779709	-3.23807	0.00120343	0.0190796	Yes	OK	1550.9	1708.12	1393.67	1767.97	1648.27	1252.86	1534.49
ENSG00000144642	RBMS3	27303	RNA binding motif single stranded interacting protein 3	chr3:29281311-29991318	+	-0.287736	0.0888793	-3.23738	0.00120634	0.0191037	Yes	OK	673.298	754.428	592.167	733.33	775.527	555.4	628.935
ENSG00000133706	LARS	51520	leucyl-tRNA synthetase	chr5:146113025-146182787	-	0.136267	0.0421032	3.23649	0.00121011	0.0191412	Yes	OK	6822.51	6490.48	7154.54	6540.81	6440.15	7140.29	7168.78
ENSG00000144560	VGLL4	9686	vestigial like family member 4	chr3:11556066-11582391	-	0.224549	0.0694176	3.23475	0.00121749	0.0192357	Yes	OK	1343.24	1227.19	1459.29	1181.86	1272.52	1455.09	1463.5
ENSG00000104312	RIPK2	8767	receptor interacting serine/threonine kinase 2	chr8:89757746-89791064	+	0.220968	0.0683692	3.23198	0.00122936	0.019401	Yes	OK	1382.22	1267.05	1497.4	1287.8	1246.3	1462.98	1531.81
ENSG00000198959	TGM2	7052	transglutaminase 2	chr20:38127386-38165429	-	-0.265651	0.0822631	-3.22929	0.00124099	0.0195619	Yes	OK	13091.7	14489.8	11693.6	14945.9	14033.8	11003.4	12383.8
ENSG00000138764	CCNG2	901	cyclin G2	chr4:77157203-77170060	+	-0.246673	0.0763971	-3.22883	0.00124296	0.0195706	Yes	OK	1040.42	1139.71	941.121	1085.55	1193.87	955.919	926.322
ENSG00000137414	FAM8A1	51439	family with sequence similarity 8 member A1	chr6:17600286-17611719	+	0.19996	0.0619397	3.2283	0.0012453	0.019585	Yes	OK	1835.69	1697.47	1973.91	1659.28	1735.65	1994.7	1953.11
ENSG00000214013	GANC	2595	glucosidase alpha, neutral C	chr15:42274167-42353666	+	-0.29161	0.0903836	-3.22636	0.00125375	0.0196953	Yes	OK	606.345	681.182	531.507	716.82	645.544	523.832	539.182
ENSG00000186193	SAPCD2	89958	suppressor APC domain containing 2	chr9:137062126-137070576	-	-0.381728	0.118439	-3.22299	0.00126861	0.0199058	Yes	OK	107.463	135.948	78.9777	132.082	139.813	78.9201	79.0354
ENSG00000140285	FGF7	2252	fibroblast growth factor 7	chr15:49423177-49487326	+	0.255377	0.0792938	3.22064	0.00127903	0.0200464	Yes	OK	905.898	814.961	996.835	817.257	812.664	960.852	1032.82
ENSG00000149380	P4HA3	283208	prolyl 4-hydroxylase subunit alpha 3	chr11:74266648-74311676	-	0.190284	0.0590997	3.21972	0.00128317	0.0200883	Yes	OK	2169.51	2016.84	2322.18	1986.73	2046.95	2269.94	2374.41
ENSG00000197614	MFAP5	8076	microfibrillar associated protein 5	chr12:8645942-8662888	-	-0.204038	0.0634142	-3.21755	0.00129289	0.0202174	Yes	OK	2403.59	2588.04	2219.14	2468.28	2707.79	2112.1	2326.19
ENSG00000146122	DAAM2	23500	dishevelled associated activator of morphogenesis 2	chr6:39792996-39904877	+	-0.362949	0.112854	-3.21609	0.00129951	0.0202942	Yes	OK	229.118	272.825	185.412	257.285	288.365	176.584	194.24
ENSG00000147459	DOCK5	80005	dedicator of cytokinesis 5	chr8:25184722-25415716	+	-0.153049	0.0475928	-3.21581	0.00130076	0.0202942	Yes	OK	4076.36	4301.55	3851.17	4325.68	4277.41	3883.85	3818.48
ENSG00000100664	EIF5	1983	eukaryotic translation initiation factor 5	chr14:103334001-103345024	+	0.129542	0.0403221	3.21268	0.00131503	0.0204936	Yes	OK	9556.37	9113.05	9999.7	9042.11	9183.98	10077.1	9922.3
ENSG00000126368	NR1D1	9572	nuclear receptor subfamily 1 group D member 1	chr17:40092783-40100725	-	0.260241	0.0810159	3.21222	0.00131712	0.0205029	Yes	OK	988.577	887.02	1090.13	880.547	893.494	1012.15	1168.12
ENSG00000166396	SERPINB7	8710	serpin family B member 7	chr18:63777776-63805376	+	-0.379962	0.118375	-3.20982	0.00132817	0.0206306	Yes	OK	127.953	159.416	96.4908	163.727	155.105	104.569	88.4125
ENSG00000119943	PYROXD2	84795	pyridine nucleotide-disulphide oxidoreductase domain 2	chr10:98383564-98415221	-	-0.377895	0.117732	-3.20979	0.00132834	0.0206306	Yes	OK	92.4928	118.996	65.9896	126.579	111.414	71.0281	60.9511
ENSG00000119943	MIR1287	100302133	microRNA 1287	chr10:98395217-98395307	-	-0.377895	0.117732	-3.20979	0.00132834	0.0206306	Yes	OK	92.4928	118.996	65.9896	126.579	111.414	71.0281	60.9511
ENSG00000163428	LRRC58	116064	leucine rich repeat containing 58	chr3:120324728-120349339	-	0.173444	0.054059	3.20841	0.0013347	0.020706	Yes	OK	2940.52	2753.24	3127.79	2682.92	2823.57	3084.79	3170.79
ENSG00000108344	PSMD3	5709	proteasome 26S subunit, non-ATPase 3	chr17:39980767-39997960	+	0.138658	0.0432509	3.20589	0.00134643	0.0208644	Yes	OK	7019.47	6672.7	7366.25	6777.46	6567.95	7261.63	7470.86
ENSG00000162298	SYVN1	84447	synoviolin 1	chr11:65127278-65134532	-	0.184955	0.0577047	3.20519	0.00134973	0.0208918	Yes	OK	2369.5	2205.98	2533.01	2173.85	2238.1	2594.5	2471.53
ENSG00000162298	MIR6751	102465449	microRNA 6751	chr11:65129915-65129978	-	0.184955	0.0577047	3.20519	0.00134973	0.0208918	Yes	OK	2369.5	2205.98	2533.01	2173.85	2238.1	2594.5	2471.53
ENSG00000197535	MYO5A	4644	myosin VA	chr15:52307283-52529050	-	-0.140794	0.0439711	-3.20198	0.00136488	0.0211017	Yes	OK	5928.58	6226.63	5630.52	6132.18	6321.09	5676.33	5584.72
ENSG00000159200	RCAN1	1827	regulator of calcineurin 1	chr21:34516442-34613843	-	-0.176132	0.0550126	-3.20166	0.00136636	0.0211017	Yes	OK	3286.75	3499.64	3073.87	3385.98	3613.3	2976.27	3171.46
ENSG00000101639	CEP192	55125	centrosomal protein 192	chr18:12991361-13125052	+	-0.234465	0.0732426	-3.20121	0.0013685	0.0211109	Yes	OK	1076.83	1174.27	979.397	1161.22	1187.32	981.568	977.226
ENSG00000103043	VAC14	55697	Vac14, PIKFYVE complex component	chr16:70687438-70801158	-	0.186	0.0581096	3.20085	0.00137024	0.021114	Yes	OK	2379.01	2217.08	2540.93	2292.17	2141.98	2516.56	2565.3
ENSG00000169714	CNBP	7555	CCHC-type zinc finger nucleic acid binding protein	chr3:129167814-129183967	-	0.130166	0.0406927	3.19875	0.00138024	0.0212442	Yes	OK	8944.62	8528.77	9360.46	8603.21	8454.33	9432.92	9288
ENSG00000128482	RNF112	7732	ring finger protein 112	chr17:19411177-19417276	+	-0.372448	0.116507	-3.19677	0.00138974	0.0213665	Yes	OK	167.99	204.105	131.875	210.506	197.705	135.151	128.6
ENSG00000144395	CCDC150	284992	coiled-coil domain containing 150	chr2:196639631-196732806	+	-0.378469	0.118468	-3.1947	0.00139977	0.0214965	Yes	OK	110.523	139.266	81.7789	143.089	135.444	83.8526	79.7052
ENSG00000120658	ENOX1	55068	ecto-NOX disulfide-thiol exchanger 1	chr13:43213560-43629477	-	0.290479	0.0909443	3.19403	0.001403	0.0215166	Yes	OK	576.954	507.015	646.892	515.945	498.085	631.361	662.424
ENSG00000120697	ALG5	29880	ALG5, dolichyl-phosphate beta-glucosyltransferase	chr13:36949770-36999367	-	0.220824	0.0691417	3.19378	0.00140421	0.0215166	Yes	OK	1364.21	1247.97	1480.44	1224.51	1271.43	1522.17	1438.71
ENSG00000142657	PGD	5226	phosphogluconate dehydrogenase	chr1:10398991-10420511	+	0.139543	0.0437241	3.19144	0.00141563	0.0216566	Yes	OK	12385.5	11761.4	13009.5	11550.3	11972.6	13394.7	12624.2
ENSG00000155324	GRAMD3	65983	GRAM domain containing 3	chr5:126423176-126494161	+	-0.246712	0.0773085	-3.19127	0.0014165	0.0216566	Yes	OK	949.805	1042.27	857.343	1025.01	1059.52	834.58	880.106
ENSG00000179222	MAGED1	9500	MAGE family member D1	chrX:51893601-51902356	+	-0.129045	0.0404484	-3.19036	0.00142096	0.0217005	Yes	OK	12849.6	13441.7	12257.6	13233	13650.4	12109.3	12405.9
ENSG00000166130	IKBIP	121457	IKBKB interacting protein	chr12:98624251-98645051	-	-0.170763	0.0535351	-3.18975	0.00142398	0.0217086	Yes	OK	2978.91	3166.11	2791.71	3143.83	3188.4	2722.74	2860.68
ENSG00000132031	MATN3	4148	matrilin 3	chr2:19992051-20012694	-	-0.363231	0.113893	-3.18921	0.0014266	0.0217086	Yes	OK	63.7781	85.2298	42.3264	79.7995	90.6601	40.4465	44.2063
ENSG00000152465	NMT2	9397	N-myristoyltransferase 2	chr10:15107865-15168710	-	-0.219105	0.0687062	-3.18902	0.00142757	0.0217086	Yes	OK	1353.99	1466.64	1241.34	1422.63	1510.64	1230.17	1252.51
ENSG00000177595	PIDD1	55367	p53-induced death domain protein 1	chr11:799178-805250	-	-0.278606	0.0873656	-3.18897	0.00142782	0.0217086	Yes	OK	726.195	809.667	642.723	861.285	758.05	665.888	619.557
ENSG00000113013	HSPA9	3313	heat shock protein family A (Hsp70) member 9	chr5:138554881-138575629	-	0.127711	0.0400839	3.1861	0.00144203	0.0219004	Yes	OK	13587	12965.5	14208.5	12783.1	13147.9	14365.4	14051.6
ENSG00000141429	GALNT1	2589	polypeptide N-acetylgalactosaminyltransferase 1	chr18:35654568-35711834	+	-0.144933	0.045513	-3.18442	0.00145042	0.0220035	Yes	OK	9176.33	9657.96	8694.71	9613.09	9702.82	8358.62	9030.8
ENSG00000142949	PTPRF	5792	protein tyrosine phosphatase, receptor type F	chr1:43526036-43623672	+	-0.31671	0.0995038	-3.18289	0.00145812	0.0220722	Yes	OK	3317.79	3787.71	2847.87	3775.34	3800.08	2588.58	3107.16
ENSG00000065911	MTHFD2	10797	methylenetetrahydrofolate dehydrogenase (NADP+ dependent) 2, methenyltetrahydrofolate cyclohydrolase	chr2:74198562-74215297	+	0.211705	0.0665177	3.18269	0.00145913	0.0220722	Yes	OK	1668.07	1533.39	1802.75	1455.65	1611.13	1779.65	1825.85
ENSG00000116285	ERRFI1	54206	ERBB receptor feedback inhibitor 1	chr1:8011718-8026333	-	0.204559	0.064275	3.18256	0.00145978	0.0220722	Yes	OK	2434.04	2243.63	2624.45	2131.2	2356.07	2757.27	2491.63
ENSG00000119820	YIPF4	84272	Yip1 domain family member 4	chr2:32277888-32306589	+	0.18484	0.0581927	3.17634	0.00149148	0.0225267	Yes	OK	2281.82	2126.12	2437.52	2177.98	2074.26	2473.16	2401.87
ENSG00000172403	SYNPO2	171024	synaptopodin 2	chr4:118888840-119061247	+	-0.316737	0.0997657	-3.1748	0.00149938	0.0226211	Yes	OK	577.826	660.781	494.872	630.141	691.42	429.128	560.616
ENSG00000164970	FAM219A	203259	family with sequence similarity 219 member A	chr9:34398183-34458570	-	0.184453	0.0581076	3.17433	0.00150183	0.0226331	Yes	OK	2188.48	2038.96	2337.99	2058.28	2019.65	2370.56	2305.42
ENSG00000164506	STXBP5	134957	syntaxin binding protein 5	chr6:147204357-147390476	+	-0.188638	0.0594635	-3.17232	0.00151224	0.0227359	Yes	OK	2216.22	2372.9	2059.54	2373.35	2372.46	1987.8	2131.28
ENSG00000071054	MAP4K4	9448	mitogen-activated protein kinase kinase kinase kinase 4	chr2:101697702-101894690	+	0.136004	0.042874	3.17219	0.00151296	0.0227359	Yes	OK	16226.2	15433.6	17018.7	14951.4	15915.8	16838.6	17198.9
ENSG00000206418	RAB12	201475	RAB12, member RAS oncogene family	chr18:8609444-8639382	+	0.221555	0.0698458	3.17206	0.00151363	0.0227359	Yes	OK	1266.78	1158.82	1374.74	1154.34	1163.29	1399.84	1349.63
ENSG00000115685	PPP1R7	5510	protein phosphatase 1 regulatory subunit 7	chr2:241149572-241183650	+	0.167877	0.0530286	3.16578	0.00154665	0.0231882	Yes	OK	2855.94	2681.32	3030.57	2689.79	2672.84	3004.88	3056.26
ENSG00000100266	PACSIN2	11252	protein kinase C and casein kinase substrate in neurons 2	chr22:42869765-42959881	-	-0.167644	0.0529619	-3.16537	0.00154888	0.0231882	Yes	OK	3137.37	3331.5	2943.24	3370.84	3292.16	2869.73	3016.74
ENSG00000114019	AMOTL2	51421	angiomotin like 2	chr3:134355344-134375417	-	-0.339651	0.107313	-3.16506	0.0015505	0.0231882	Yes	OK	3513.43	4089.66	2937.19	3864.77	4314.55	2671.44	3202.94
ENSG00000188112	C6orf132	647024	chromosome 6 open reading frame 132	chr6:42101118-42142977	-	-0.363173	0.114798	-3.16359	0.00155836	0.0232804	Yes	OK	227.587	272.599	182.574	233.895	311.303	175.597	189.551
ENSG00000115307	AUP1	550	ancient ubiquitous protein 1	chr2:74526647-74529897	-	0.137768	0.043632	3.15749	0.00159133	0.0237208	Yes	OK	6018.49	5720.61	6316.37	5768.96	5672.27	6387.59	6245.14
ENSG00000175745	NR2F1	7025	nuclear receptor subfamily 2 group F member 1	chr5:93583336-93594609	+	0.258376	0.0818306	3.15745	0.00159158	0.0237208	Yes	OK	844.212	757.936	930.487	793.868	722.004	910.54	950.435
ENSG00000102317	RBM3	5935	RNA binding motif (RNP1, RRM) protein 3	chrX:48574352-48581165	+	-0.142346	0.0450864	-3.15718	0.00159303	0.0237208	Yes	OK	5456.83	5734.38	5179.29	5690.53	5778.22	5272.85	5085.73
ENSG00000177853	ZNF518A	9849	zinc finger protein 518A	chr10:96130279-96163761	+	-0.271904	0.086182	-3.155	0.00160497	0.0238726	Yes	OK	676.869	751.577	602.162	737.458	765.696	615.577	588.747
ENSG00000134440	NARS	4677	asparaginyl-tRNA synthetase	chr18:57600660-57621945	-	0.127813	0.0405464	3.15226	0.0016201	0.0240716	Yes	OK	8369.61	7987.99	8751.24	8003.34	7972.63	8729.55	8772.93
ENSG00000138658	ZGRF1	55345	zinc finger GRF-type containing 1	chr4:112539332-112636995	-	-0.354263	0.11244	-3.15068	0.0016289	0.0241761	Yes	OK	229.752	271.753	187.751	262.788	280.719	195.327	180.174
ENSG00000130816	DNMT1	1786	DNA methyltransferase 1	chr19:10133343-10195135	-	-0.175206	0.0556144	-3.15037	0.00163066	0.0241761	Yes	OK	2497.81	2659.46	2336.16	2652.65	2666.28	2296.57	2375.75
ENSG00000155966	AFF2	2334	AF4/FMR2 family member 2	chrX:148500618-149000663	+	-0.368839	0.117138	-3.14877	0.0016396	0.0242823	Yes	OK	158.005	192.452	123.557	198.123	186.782	129.232	117.883
ENSG00000135622	SEMA4F	10505	ssemaphorin 4F	chr2:74654227-74683854	+	-0.242977	0.0772681	-3.1446	0.00166313	0.0246042	Yes	OK	927.664	1015.95	839.381	997.494	1034.4	839.512	839.249
ENSG00000144791	LIMD1	8994	LIM domains containing 1	chr3:45594830-45681263	+	0.209524	0.066662	3.14308	0.0016718	0.0247058	Yes	OK	1597.42	1469.9	1724.95	1491.43	1448.38	1791.49	1658.4
ENSG00000146802	TMEM168	64418	transmembrane protein 168	chr7:112762381-112790423	-	0.209207	0.0666006	3.14122	0.00168245	0.0248366	Yes	OK	1456.27	1341.37	1571.18	1335.95	1346.79	1542.89	1599.46
ENSG00000159377	PSMB4	5692	proteasome subunit beta 4	chr1:151399564-151401936	+	0.135975	0.0432948	3.14068	0.00168558	0.024856	Yes	OK	8020.03	7625.98	8414.08	7490.15	7761.82	8575.65	8252.5
ENSG00000164237	CMBL	134147	carboxymethylenebutenolidase homolog	chr5:10277594-10308056	-	-0.210728	0.0671145	-3.13983	0.00169047	0.0248794	Yes	OK	1465.97	1584.3	1347.64	1594.61	1573.99	1306.13	1389.15
ENSG00000197467	COL13A1	1305	collagen type XIII alpha 1 chain	chr10:69801887-69959148	+	-0.356953	0.113688	-3.13977	0.0016908	0.0248794	Yes	OK	213.409	253.851	172.966	258.661	249.042	182.503	163.429
ENSG00000182253	SYNM	23336	synemin	chr15:99105079-99135595	+	-0.281252	0.089633	-3.13782	0.00170209	0.0250125	Yes	OK	650.671	728.276	573.065	749.84	706.712	538.629	607.501
ENSG00000166801	FAM111A	63901	family with sequence similarity 111 member A	chr11:59144778-59155038	+	-0.244993	0.0780833	-3.13758	0.00170349	0.0250125	Yes	OK	912.554	1000.9	824.207	1026.39	975.416	832.607	815.806
ENSG00000112655	PTK7	5754	protein tyrosine kinase 7 (inactive)	chr6:43076267-43161720	+	-0.149952	0.0478312	-3.13503	0.00171834	0.0252036	Yes	OK	7466.62	7873.52	7059.71	7740.55	8006.49	6764.44	7354.98
ENSG00000130402	ACTN4	81	actinin alpha 4	chr19:38647615-38730532	+	-0.153281	0.0489053	-3.13424	0.00172298	0.0252293	Yes	OK	27780.5	29326.6	26234.4	29077.3	29576	24851.9	27616.9
ENSG00000188486	H2AFX	3014	H2A histone family member X	chr11:119093874-119095467	-	-0.265319	0.0846593	-3.13396	0.00172464	0.0252293	Yes	OK	904.911	1004.49	805.334	1071.79	937.186	754.673	855.994
ENSG00000167191	GPRC5B	51704	G protein-coupled receptor class C group 5 member B	chr16:19858970-19884911	-	-0.341494	0.108972	-3.13379	0.00172562	0.0252293	Yes	OK	51.2978	70.5418	32.0537	59.1617	81.9218	28.6085	35.499
ENSG00000156504	FAM122B	159090	family with sequence similarity 122B	chrX:134769565-134796355	-	-0.245255	0.0783599	-3.12986	0.0017489	0.0255425	Yes	OK	1289.38	1413.2	1165.56	1481.79	1344.61	1258.78	1072.34
ENSG00000099256	PRTFDC1	56952	phosphoribosyl transferase domain containing 1	chr10:24848606-24952644	-	-0.326465	0.104419	-3.12649	0.00176904	0.0258091	Yes	OK	351.579	405.522	297.637	432.018	379.025	299.896	295.378
ENSG00000186469	GNG2	54331	G protein subunit gamma 2	chr14:51860303-51969800	+	-0.270365	0.0866312	-3.12087	0.00180316	0.026279	Yes	OK	684.25	759.585	608.914	725.075	794.095	609.658	608.171
ENSG00000183160	TMEM119	338773	transmembrane protein 119	chr12:108589845-108598118	-	-0.281383	0.0902661	-3.11726	0.00182542	0.0265752	Yes	OK	689.104	771.464	606.744	760.847	782.08	554.413	659.075
ENSG00000171703	TCEA2	6919	transcription elongation factor A2	chr20:64057085-64072347	+	0.258025	0.0828041	3.11609	0.00183264	0.026652	Yes	OK	785.684	703.695	867.672	712.692	694.697	894.756	840.589
ENSG00000023287	RB1CC1	9821	RB1 inducible coiled-coil 1	chr8:52622457-52714466	-	0.166426	0.0534154	3.11569	0.00183514	0.02666	Yes	OK	3110.73	2921.14	3300.32	2849.39	2992.88	3241.64	3359.01
ENSG00000112902	SEMA5A	9037	semaphorin 5A	chr5:9035025-9546121	-	-0.259438	0.0833343	-3.11322	0.00185058	0.0268559	Yes	OK	1080.04	1194.41	965.662	1144.71	1244.12	873.053	1058.27
ENSG00000100462	PRMT5	10419	protein arginine methyltransferase 5	chr14:22920510-22929585	-	0.203027	0.0652258	3.11267	0.00185402	0.0268774	Yes	OK	1682.01	1551.8	1812.22	1485.92	1617.68	1824.04	1800.4
ENSG00000132688	NES	10763	nestin	chr1:156668762-156677397	-	-0.216098	0.0694509	-3.11153	0.00186123	0.0269535	Yes	OK	1255.72	1359.08	1152.36	1359.34	1358.81	1164.07	1140.66
ENSG00000137824	RMDN3	55177	regulator of microtubule dynamics 3	chr15:40735883-40755336	-	0.193359	0.0621603	3.11065	0.00186673	0.0270046	Yes	OK	1858.17	1722.82	1993.51	1719.82	1725.82	2047.98	1939.05
ENSG00000092841	MYL6	4637	myosin light chain 6	chr12:56158260-56161582	+	-0.138712	0.0446025	-3.10996	0.00187112	0.0270395	Yes	OK	21319.6	22385.6	20253.5	22287.5	22483.7	19469.6	21037.5
ENSG00000178381	ZFAND2A	90637	zinc finger AN1-type containing 2A	chr7:1152906-1160219	-	0.287709	0.0926064	3.1068	0.00189127	0.0272919	Yes	OK	557.43	489.071	625.789	500.811	477.331	650.104	601.473
ENSG00000103496	STX4	6810	syntaxin 4	chr16:31033094-31040167	+	0.172048	0.0553815	3.10659	0.00189256	0.0272919	Yes	OK	2495.43	2338.05	2652.82	2363.72	2312.38	2658.62	2647.02
ENSG00000133169	BEX1	55859	brain expressed X-linked 1	chrX:103062652-103064240	-	-0.36165	0.116444	-3.10578	0.00189778	0.0273168	Yes	OK	192.111	232.715	151.507	265.54	199.889	148.962	154.052
ENSG00000170340	B3GNT2	10678	UDP-GlcNAc:betaGal beta-1,3-N-acetylglucosaminyltransferase 2	chr2:62196126-62224731	+	0.210417	0.0677517	3.1057	0.00189828	0.0273168	Yes	OK	2055.11	1889.03	2221.18	1912.44	1865.63	2381.41	2060.95
ENSG00000180957	PITPNB	23760	phosphatidylinositol transfer protein beta	chr22:27851668-27919306	-	0.156528	0.0504424	3.10311	0.00191498	0.0275283	Yes	OK	3479.97	3283.2	3676.75	3341.95	3224.44	3658.93	3694.57
ENSG00000124571	XPO5	57510	exportin 5	chr6:43522329-43576075	-	0.163438	0.0526849	3.10218	0.00192101	0.0275861	Yes	OK	3005.3	2826.34	3184.25	2803.99	2848.69	3136.09	3232.42
ENSG00000109881	CCDC34	91057	coiled-coil domain containing 34	chr11:27348871-27363248	-	-0.277052	0.089326	-3.10158	0.00192491	0.0276132	Yes	OK	611.734	681.902	541.567	654.906	708.897	540.602	542.531
ENSG00000259583	LOC101927751	101927751	uncharacterized LOC101927751	chr15:100913203-100919283	-	-0.366352	0.118214	-3.09906	0.00194139	0.0278204	Yes	OK	141.495	174.692	108.298	195.371	154.013	113.448	103.148
ENSG00000031698	SARS	6301	seryl-tRNA synthetase	chr1:109213892-109238182	+	0.134091	0.0432847	3.09788	0.00194909	0.0279017	Yes	OK	5905.78	5620.99	6190.58	5602.48	5639.5	6227.78	6153.38
ENSG00000106034	CPED1	79974	cadherin like and PC-esterase domain containing 1	chr7:120989390-121261918	+	-0.358697	0.115805	-3.09742	0.00195213	0.0279161	Yes	OK	189.912	228.561	151.263	214.633	242.489	139.097	163.429
ENSG00000143153	ATP1B1	481	ATPase Na+/K+ transporting subunit beta 1	chr1:169106708-169132722	+	-0.297871	0.0961778	-3.09709	0.00195433	0.0279184	Yes	OK	484.22	546.905	421.535	521.449	572.36	410.384	432.686
ENSG00000185745	IFIT1	3434	interferon induced protein with tetratricopeptide repeats 1	chr10:89392545-89406487	+	-0.317574	0.102635	-3.09422	0.00197329	0.0281599	Yes	OK	380.688	436.899	324.478	460.911	412.886	312.721	336.235
ENSG00000162522	KIAA1522	57648	KIAA1522	chr1:32765633-32774970	+	0.19663	0.0635679	3.09323	0.00197993	0.0282253	Yes	OK	1889.6	1752.2	2027.01	1798.24	1706.16	1956.23	2097.79
ENSG00000169554	ZEB2	9839	zinc finger E-box binding homeobox 2	chr2:144511384-144520391	-	0.175788	0.0568439	3.09247	0.00198498	0.0282465	Yes	OK	2516.54	2351.67	2681.41	2283.92	2419.42	2717.81	2645.01
ENSG00000162618	ADGRL4	64123	adhesion G protein-coupled receptor L4	chr1:78889763-79006810	-	-0.148436	0.0480014	-3.09234	0.00198587	0.0282465	Yes	OK	3887.06	4095.78	3678.33	4109.68	4081.89	3687.54	3669.12
ENSG00000100380	ST13	6767	suppression of tumorigenicity 13 (colon carcinoma) (Hsp70 interacting protein)	chr22:40824534-40857008	-	0.164957	0.0533483	3.09208	0.00198759	0.0282465	Yes	OK	2807.99	2637.88	2978.1	2612.75	2663.01	2993.04	2963.16
ENSG00000169189	NSMCE1	197370	NSE1 homolog, SMC5-SMC6 complex component	chr16:27224993-27268792	-	0.218308	0.070643	3.0903	0.00199957	0.0283873	Yes	OK	1284.06	1175.26	1392.85	1133.7	1216.81	1414.64	1371.06
ENSG00000204103	MAFB	9935	MAF bZIP transcription factor B	chr20:40685847-40689240	-	0.265708	0.086038	3.08826	0.00201333	0.0285531	Yes	OK	879.61	785.915	973.305	826.888	744.942	897.716	1048.89
ENSG00000186871	ERCC6L	54821	ERCC excision repair 6 like, spindle assembly checkpoint helicase	chrX:72204656-72239008	-	-0.338728	0.109707	-3.08757	0.002018	0.0285897	Yes	OK	290.122	338.189	242.055	319.198	357.179	262.409	221.701
ENSG00000041353	RAB27B	5874	RAB27B, member RAS oncogene family	chr18:54828476-54895516	+	-0.165016	0.0534887	-3.08506	0.00203511	0.0288024	Yes	OK	4262.12	4521.95	4002.28	4763.21	4280.69	3984.48	4020.09
ENSG00000186468	RPS23	6228	ribosomal protein S23	chr5:82273319-82278416	-	0.162028	0.0525804	3.08153	0.00205941	0.0291163	Yes	OK	3617.41	3402.88	3831.94	3289.67	3516.08	3753.64	3910.24
ENSG00000132471	WBP2	23558	WW domain binding protein 2	chr17:75845698-75855812	-	0.16014	0.0520108	3.07897	0.00207717	0.0293338	Yes	OK	3504.62	3298.73	3710.52	3190.61	3406.86	3683.59	3737.44
ENSG00000163171	CDC42EP3	10602	CDC42 effector protein 3	chr2:37641881-37672199	-	-0.189077	0.0614145	-3.0787	0.00207908	0.0293338	Yes	OK	2715.49	2909.22	2521.75	2876.91	2941.54	2363.66	2679.84
ENSG00000110876	SELPLG	6404	selectin P ligand	chr12:108621903-108633894	-	-0.312736	0.101638	-3.07696	0.00209126	0.0294753	Yes	OK	391.921	448.368	335.475	460.911	435.824	318.64	352.31
ENSG00000160818	GPATCH4	54865	G-patch domain containing 4	chr1:156594307-156601487	-	0.214683	0.0698234	3.07465	0.00210749	0.0296736	Yes	OK	1384.1	1272.09	1496.11	1320.82	1223.37	1457.06	1535.16
ENSG00000114127	XRN1	54464	5'-3' exoribonuclease 1	chr3:142417840-142448062	-	-0.188836	0.0614395	-3.07353	0.00211541	0.0297546	Yes	OK	1964.69	2101.42	1827.95	2039.02	2163.83	1861.53	1794.37
ENSG00000110237	ARHGEF17	9828	Rho guanine nucleotide exchange factor 17	chr11:73308617-73369380	+	-0.198827	0.0647199	-3.07212	0.00212543	0.029865	Yes	OK	2964.87	3189.09	2740.65	3117.69	3260.49	2521.5	2959.81
ENSG00000175643	RMI2	116028	RecQ mediated genome instability 2	chr16:11345437-11351763	+	-0.360758	0.117612	-3.06737	0.00215952	0.0303128	Yes	OK	147.112	179.282	114.941	181.613	176.951	119.367	110.516
ENSG00000131711	MAP1B	4131	microtubule associated protein 1B	chr5:72107267-72209570	+	-0.141913	0.0462704	-3.06703	0.002162	0.0303166	Yes	OK	49950.1	52508.3	47391.8	51807.8	53208.8	45500.4	49283.3
ENSG00000092068	SLC7A8	23428	solute carrier family 7 member 8	chr14:23125294-23154450	-	-0.247006	0.0805952	-3.06478	0.00217833	0.0305145	Yes	OK	817.823	898.694	736.953	898.433	898.955	725.078	748.827
ENSG00000111275	ALDH2	217	aldehyde dehydrogenase 2 family (mitochondrial)	chr12:111766886-111809985	+	0.175967	0.0574509	3.06291	0.00219198	0.0306742	Yes	OK	2224.55	2080.59	2368.51	2091.3	2069.89	2347.87	2389.15
ENSG00000008311	AASS	10157	aminoadipate-semialdehyde synthase	chr7:122073543-122144290	-	-0.355993	0.116366	-3.05924	0.00221897	0.0310204	Yes	OK	172.121	207.098	137.143	207.754	206.443	145.016	129.27
ENSG00000101361	NOP56	10528	NOP56 ribonucleoprotein	chr20:2652531-2658393	+	0.160443	0.0524572	3.05855	0.00222414	0.0310609	Yes	OK	3081.53	2902.18	3260.87	2962.21	2842.14	3252.49	3269.25
ENSG00000101361	MIR1292	100302138	microRNA 1292	chr20:2652776-2652842	+	0.160443	0.0524572	3.05855	0.00222414	0.0310609	Yes	OK	3081.53	2902.18	3260.87	2962.21	2842.14	3252.49	3269.25
ENSG00000156136	DCK	1633	deoxycytidine kinase	chr4:70993547-71030912	+	-0.226217	0.0739984	-3.05705	0.00223525	0.0311559	Yes	OK	1059.69	1152.08	967.305	1141.96	1162.2	985.514	949.095
ENSG00000175505	CLCF1	23529	cardiotrophin-like cytokine factor 1	chr11:67364167-67374177	-	0.266614	0.0872202	3.05679	0.00223723	0.0311559	Yes	OK	976.268	868.131	1084.41	903.936	832.326	1197.61	971.198
ENSG00000119638	NEK9	91754	NIMA related kinase 9	chr14:75081378-75127080	-	0.138989	0.04547	3.05672	0.00223776	0.0311559	Yes	OK	5856.71	5564.64	6148.78	5506.17	5623.11	6002.86	6294.7
ENSG00000115649	CNPPD1	27013	cyclin Pas1/PHO80 domain containing 1	chr2:219171896-219177191	-	0.173516	0.0568409	3.05266	0.0022682	0.0315477	Yes	OK	2567.44	2401.46	2733.41	2380.23	2422.7	2816.46	2650.37
ENSG00000171408	PDE7B	27115	phosphodiesterase 7B	chr6:135851695-136195571	+	-0.323624	0.10605	-3.05161	0.00227618	0.0315841	Yes	OK	425.534	492.553	358.516	518.697	466.408	307.788	409.243
ENSG00000150593	PDCD4	27250	programmed cell death 4 (neoplastic transformation inhibitor)	chr10:110871794-110900006	+	-0.201265	0.0659576	-3.05143	0.00227753	0.0315841	Yes	OK	1461.04	1571.96	1350.12	1580.86	1563.07	1363.34	1336.9
ENSG00000150593	MIR4680	100616113	microRNA 4680	chr10:110898089-110898155	+	-0.201265	0.0659576	-3.05143	0.00227753	0.0315841	Yes	OK	1461.04	1571.96	1350.12	1580.86	1563.07	1363.34	1336.9
ENSG00000013275	PSMC4	5704	proteasome 26S subunit, ATPase 4	chr19:39971004-39981764	+	0.157754	0.0516987	3.05141	0.00227772	0.0315841	Yes	OK	3611.22	3401.18	3821.25	3310.3	3492.05	3895.69	3746.82
ENSG00000138642	HERC6	55008	HECT and RLD domain containing E3 ubiquitin protein ligase family member 6	chr4:88378738-88443097	+	-0.345612	0.113282	-3.05089	0.00228168	0.031607	Yes	OK	63.9724	84.7047	43.2401	85.3029	84.1064	50.3115	36.1688
ENSG00000118855	MFSD1	64747	major facilitator superfamily domain containing 1	chr3:158801925-158829719	+	-0.131471	0.0431048	-3.05004	0.00228812	0.0316424	Yes	OK	6560.09	6869.32	6250.87	6957.69	6780.94	6317.55	6184.19
ENSG00000166922	SCG5	6447	secretogranin V	chr15:32641612-32697098	+	0.345691	0.113344	3.04994	0.00228884	0.0316424	Yes	OK	239.234	195.53	282.938	217.385	173.674	295.95	269.926
ENSG00000163923	RPL39L	116832	ribosomal protein L39 like	chr3:187120952-187139475	-	-0.338769	0.111157	-3.04766	0.00230633	0.0318519	Yes	OK	254.666	298.094	211.237	295.809	300.38	226.895	195.579
ENSG00000198911	SREBF2	6721	sterol regulatory element binding transcription factor 2	chr22:41833078-41907308	+	0.160866	0.0527986	3.04679	0.00231302	0.0319122	Yes	OK	4300.68	4046.31	4555.05	3846.89	4245.73	4490.55	4619.55
ENSG00000154277	UCHL1	7345	ubiquitin C-terminal hydrolase L1	chr4:41256880-41268429	+	0.153013	0.0502541	3.04479	0.00232842	0.0320798	Yes	OK	5750.63	5427.21	6074.06	5306.67	5547.75	6334.32	5813.79
ENSG00000084073	ZMPSTE24	10269	zinc metallopeptidase STE24	chr1:40258049-40294184	+	0.139558	0.0458377	3.04461	0.00232984	0.0320798	Yes	OK	5339.32	5068.81	5609.84	4950.32	5187.29	5649.69	5569.99
ENSG00000163637	PRICKLE2	166336	prickle planar cell polarity protein 2	chr3:64093849-64225455	-	-0.241951	0.0794886	-3.04385	0.00233573	0.0321285	Yes	OK	860.261	943.325	777.197	965.849	920.801	773.417	780.977
ENSG00000196305	IARS	3376	isoleucyl-tRNA synthetase	chr9:92210208-92293756	-	0.135979	0.0446965	3.04228	0.00234793	0.032264	Yes	OK	11844.6	11262.9	12426.3	10819.7	11706.1	12390.5	12462.1
ENSG00000107404	MIR6808	102466740	microRNA 6808	chr1:1339649-1339708	-	0.147983	0.0486543	3.04152	0.00235386	0.0323132	Yes	OK	5698.02	5396.13	5999.91	5535.06	5257.2	5803.58	6196.24
ENSG00000107404	DVL1	1855	dishevelled segment polarity protein 1	chr1:1335277-1349112	-	0.147983	0.0486543	3.04152	0.00235386	0.0323132	Yes	OK	5698.02	5396.13	5999.91	5535.06	5257.2	5803.58	6196.24
ENSG00000121039	RDH10	157506	retinol dehydrogenase 10 (all-trans)	chr8:73294601-73325285	+	-0.281227	0.092479	-3.04098	0.00235808	0.0323387	Yes	OK	529.062	592.082	466.042	588.865	595.299	468.588	463.496
ENSG00000181817	LSM10	84967	LSM10, U7 small nuclear RNA associated	chr1:36393419-36397959	-	0.20266	0.0666527	3.04053	0.00236161	0.0323547	Yes	OK	1451.96	1340.2	1563.72	1313.94	1366.46	1552.75	1574.68
ENSG00000243156	MICAL3	57553	microtubule associated monooxygenase, calponin and LIM domain containing 3	chr22:17787649-18024559	-	-0.159778	0.052564	-3.03969	0.00236823	0.032413	Yes	OK	2923.25	3094.03	2752.47	3075.03	3113.03	2728.66	2776.29
ENSG00000061676	NCKAP1	10787	NCK associated protein 1	chr2:182924850-183038858	-	0.123262	0.0405625	3.03881	0.00237514	0.0324752	Yes	OK	13076.8	12499.9	13653.6	12250.6	12749.2	13577.2	13730.1
ENSG00000047932	GOPC	57120	golgi associated PDZ and coiled-coil motif containing	chr6:117560269-117602542	-	-0.164194	0.0540986	-3.0351	0.00240459	0.0328451	Yes	OK	3287.31	3487.66	3086.95	3540.07	3435.25	2974.3	3199.6
ENSG00000132382	MYBBP1A	10514	MYB binding protein 1a	chr17:4538895-4555386	-	0.167573	0.0552383	3.03364	0.00241626	0.0329717	Yes	OK	3438.46	3229.81	3647.12	3306.18	3153.44	3495.17	3799.06
ENSG00000165175	MID1IP1	58526	MID1 interacting protein 1	chrX:38801431-38806530	+	0.199932	0.065921	3.0329	0.00242215	0.033006	Yes	OK	1531.27	1415.27	1647.26	1379.98	1450.56	1626.74	1667.78
ENSG00000182307	C8orf33	65265	chromosome 8 open reading frame 33	chr8:145052437-145056030	+	0.187132	0.0617042	3.03272	0.00242359	0.033006	Yes	OK	1884.43	1753.49	2015.37	1741.83	1765.14	1965.11	2065.64
ENSG00000160305	DIP2A	23181	disco interacting protein 2 homolog A	chr21:46458948-46550110	+	-0.205498	0.0677942	-3.0312	0.00243585	0.0331367	Yes	OK	1361.52	1467.53	1255.5	1479.04	1456.02	1274.56	1236.44
ENSG00000147649	MTDH	92140	metadherin	chr8:97644178-97730260	+	0.120451	0.0397416	3.03087	0.00243852	0.0331367	Yes	OK	9753.98	9334.88	10173.1	9318.66	9351.1	10160	10186.2
ENSG00000119681	LTBP2	4053	latent transforming growth factor beta binding protein 2	chr14:74498182-74612331	-	-0.307012	0.101303	-3.03063	0.00244043	0.0331367	Yes	OK	29069.8	33117.9	25021.7	31742.3	34493.5	22949	27094.4
ENSG00000143162	CREG1	8804	cellular repressor of E1A stimulated genes 1	chr1:167541013-167553819	-	0.179577	0.0592877	3.0289	0.00245442	0.0332937	Yes	OK	2141.79	1997.62	2285.95	1959.22	2036.03	2330.11	2241.79
ENSG00000151748	SAV1	60485	salvador family WW domain containing protein 1	chr14:50633579-50668353	-	0.244939	0.0809188	3.02698	0.00247013	0.0334737	Yes	OK	877.309	790.705	963.914	793.868	787.542	1008.2	919.624
ENSG00000173207	CKS1B	1163	CDC28 protein kinase regulatory subunit 1B	chr1:154974641-154979249	+	-0.354639	0.117209	-3.0257	0.00248057	0.0335489	Yes	OK	165.713	201.275	130.152	220.137	182.413	122.326	137.977
ENSG00000164050	PLXNB1	5364	plexin B1	chr3:48403853-48429463	-	-0.254122	0.0840522	-3.02339	0.00249963	0.0337443	Yes	OK	750.157	826.488	673.826	796.619	856.356	688.578	659.075
ENSG00000120539	MASTL	84930	microtubule associated serine/threonine kinase like	chr10:27154823-27187953	+	-0.265457	0.0878023	-3.02335	0.00249994	0.0337443	Yes	OK	648.888	719.228	578.548	704.437	734.019	597.82	559.276
ENSG00000148677	ANKRD1	27063	ankyrin repeat domain 1	chr10:90912099-90921275	-	-0.307736	0.101845	-3.02162	0.00251429	0.0339046	Yes	OK	419.249	478.526	359.972	456.784	500.269	331.464	388.479
ENSG00000089486	CDIP1	29965	cell death inducing p53 target 1	chr16:4510675-4538815	-	-0.202318	0.0669947	-3.01992	0.00252845	0.034062	Yes	OK	1567.57	1687.04	1448.11	1611.12	1762.96	1433.39	1462.83
ENSG00000162591	MEGF6	1953	multiple EGF like domains 6	chr1:3487941-3611495	-	-0.227821	0.0754769	-3.01842	0.00254095	0.0341968	Yes	OK	1469.86	1603.2	1336.52	1645.52	1560.88	1222.27	1450.77
ENSG00000198431	TXNRD1	7296	thioredoxin reductase 1	chr12:104286681-104350307	+	0.137005	0.0454025	3.01756	0.00254821	0.0342609	Yes	OK	27500.8	26140.2	28861.4	25439.5	26840.9	29767.7	27955.1
ENSG00000106591	MRPL32	64983	mitochondrial ribosomal protein L32	chr7:42932339-42937854	+	0.225373	0.0747339	3.01567	0.00256413	0.0344201	Yes	OK	1244.58	1133.87	1355.28	1129.58	1138.17	1439.3	1271.26
ENSG00000091656	ZFHX4	79776	zinc finger homeobox 4	chr8:76681279-76867285	+	-0.211346	0.0700853	-3.01556	0.00256507	0.0344201	Yes	OK	1375.29	1488.07	1262.52	1492.8	1483.33	1203.53	1321.5
ENSG00000135919	SERPINE2	5270	serpin family E member 2	chr2:223975047-224039319	-	0.13358	0.0443479	3.01208	0.0025946	0.0347484	Yes	OK	21257	20236.7	22277.3	19698.1	20775.4	21666.5	22888.1
ENSG00000104518	GSDMD	79792	gasdermin D	chr8:143558306-143563061	+	-0.300367	0.10001	-3.00338	0.00267002	0.0357236	Yes	OK	492.931	560.054	425.808	532.455	587.652	382.762	468.854
ENSG00000204569	PPP1R10	5514	protein phosphatase 1 regulatory subunit 10	chr6:30600399-30617307	-	-0.183466	0.0611482	-3.00035	0.00269666	0.0359993	Yes	OK	2426.31	2589.37	2263.24	2497.17	2681.57	2359.71	2166.78
ENSG00000107290	SETX	23064	senataxin	chr9:132261439-132354985	-	0.153656	0.051216	3.00016	0.00269836	0.0359993	Yes	OK	4646.11	4385.33	4906.89	4205.99	4564.68	4796.37	5017.41
ENSG00000109917	ZPR1	8882	ZPR1 zinc finger	chr11:116778188-116788038	-	0.172766	0.0575858	3.00015	0.00269851	0.0359993	Yes	OK	2290.6	2145.23	2435.97	2140.83	2149.63	2386.35	2485.6
ENSG00000065989	PDE4A	5141	phosphodiesterase 4A	chr19:10416772-10469631	+	0.211906	0.0706562	2.99912	0.00270763	0.0360859	Yes	OK	1220.62	1122	1319.24	1130.95	1113.04	1298.24	1340.25
ENSG00000160957	RECQL4	9401	RecQ like helicase 4	chr8:144511283-144517826	-	-0.294995	0.0984138	-2.9975	0.00272206	0.036243	Yes	OK	438.05	494.832	381.267	471.918	517.746	382.762	379.772
ENSG00000152217	SETBP1	26040	SET binding protein 1	chr18:44680897-45068510	+	-0.354537	0.118374	-2.99505	0.00274404	0.0365002	Yes	OK	105.92	132.65	79.1907	126.579	138.721	73.9876	84.3938
ENSG00000162595	DIRAS3	9077	DIRAS family GTPase 3	chr1:68045961-68051631	-	-0.313409	0.104668	-2.99432	0.00275056	0.0365516	Yes	OK	334.139	383.324	284.953	375.608	391.04	277.207	292.699
ENSG00000069275	NUCKS1	64710	nuclear casein kinase and cyclin dependent kinase substrate 1	chr1:205712818-205750244	-	-0.141853	0.0473877	-2.99346	0.00275829	0.0366188	Yes	OK	6270.81	6593.34	5948.28	6447.25	6739.43	5755.25	6141.32
ENSG00000176845	METRNL	284207	meteorin like, glial cell differentiation regulator	chr17:83079690-83095126	+	0.195434	0.0653047	2.99265	0.00276571	0.0366818	Yes	OK	1931.2	1790.88	2071.53	1807.87	1773.88	1958.2	2184.86
ENSG00000111684	LPCAT3	10162	lysophosphatidylcholine acyltransferase 3	chr12:6976184-7018538	-	-0.297624	0.0995062	-2.99101	0.0027806	0.0368437	Yes	OK	415.3	470.864	359.735	488.428	453.301	357.113	362.357
ENSG00000103126	AXIN1	8312	axin 1	chr16:287439-352676	-	0.226662	0.0758325	2.98898	0.00279913	0.0370534	Yes	OK	979.733	892.949	1066.52	895.681	890.217	1067.39	1065.64
ENSG00000213190	MLLT11	10962	myeloid/lymphoid or mixed-lineage leukemia; translocated to, 11	chr1:151059674-151068497	+	0.164005	0.0548828	2.98828	0.00280553	0.0371023	Yes	OK	3308.65	3106.58	3510.73	3000.74	3212.43	3613.55	3407.9
ENSG00000187555	USP7	7874	ubiquitin specific peptidase 7	chr16:8892093-8936729	-	0.138443	0.0463454	2.9872	0.00281548	0.037198	Yes	OK	4828.91	4589.16	5068.66	4593.98	4584.34	4975.91	5161.42
ENSG00000108262	GIT1	28964	GIT ArfGAP 1	chr17:29573468-29589592	-	0.188483	0.063116	2.9863	0.00282378	0.0372717	Yes	OK	1928.8	1791.9	2065.71	1717.07	1866.73	2026.27	2105.16
ENSG00000166173	LARP6	55323	La ribonucleoprotein domain family member 6	chr15:70831523-70853458	-	0.170205	0.0570308	2.98444	0.002841	0.0374629	Yes	OK	2631.78	2466.52	2797.03	2396.74	2536.3	2726.69	2867.38
ENSG00000107554	DNMBP	23268	dynamin binding protein	chr10:99875570-99914092	-	-0.171436	0.0574596	-2.98359	0.00284886	0.037503	Yes	OK	2552.85	2714.87	2390.83	2644.39	2785.34	2324.2	2457.47
ENSG00000020577	SAMD4A	23034	sterile alpha motif domain containing 4A	chr14:54567611-54793315	+	-0.201815	0.0676431	-2.98352	0.0028495	0.037503	Yes	OK	1546.8	1665.74	1427.85	1611.12	1720.36	1378.14	1477.56
ENSG00000115457	IGFBP2	3485	insulin like growth factor binding protein 2	chr2:216632827-216664435	+	0.184299	0.0617888	2.98272	0.002857	0.0375656	Yes	OK	2331.23	2172.64	2489.81	2168.35	2176.94	2358.72	2620.9
ENSG00000136111	TBC1D4	9882	TBC1 domain family member 4	chr13:75284663-75482168	-	-0.200783	0.0673818	-2.97978	0.00288458	0.037852	Yes	OK	1979.02	2132.24	1825.79	2136.7	2127.78	1695.79	1955.79
ENSG00000091039	OSBPL8	114882	oxysterol binding protein like 8	chr12:76351797-76559809	-	0.151197	0.0507434	2.97965	0.00288582	0.037852	Yes	OK	4962.18	4686.96	5237.4	4461.89	4912.03	5217.6	5257.2
ENSG00000118705	RPN2	6185	ribophorin II	chr20:37179045-37241622	+	-0.119992	0.0402736	-2.97943	0.00288788	0.037852	Yes	OK	10685.5	11142.1	10228.8	10972.4	11311.8	10215.2	10242.5
ENSG00000177943	MAMDC4	158056	MAM domain containing 4	chr9:136852366-136860799	+	-0.339603	0.113991	-2.97922	0.00288982	0.037852	Yes	OK	64.9349	85.2718	44.5979	90.8064	79.7372	48.3385	40.8573
ENSG00000146410	MTFR2	113115	mitochondrial fission regulator 2	chr6:136231029-136250335	-	-0.351548	0.118216	-2.97378	0.00294153	0.0384924	Yes	OK	136.305	166.516	106.094	163.727	169.305	116.407	95.7802
ENSG00000170502	NUDT9	53343	nudix hydrolase 9	chr4:87422575-87459454	+	0.161566	0.0543435	2.97305	0.00294858	0.0385338	Yes	OK	2615.17	2460.22	2770.12	2462.78	2457.65	2776.01	2764.23
ENSG00000079931	MOXD1	26002	monooxygenase DBH like 1	chr6:132296054-132401534	-	-0.28153	0.0946999	-2.97287	0.00295031	0.0385338	Yes	OK	519.339	582.551	456.128	559.973	605.129	436.033	476.222
ENSG00000106299	WASL	8976	Wiskott-Aldrich syndrome like	chr7:123681926-123749071	-	0.176095	0.059245	2.97232	0.00295557	0.0385658	Yes	OK	2264.55	2118.59	2410.51	2173.85	2063.34	2350.83	2470.19
ENSG00000175414	ARL10	285598	ADP ribosylation factor like GTPase 10	chr5:176365467-176369956	+	0.196517	0.0661481	2.97087	0.0029696	0.0387121	Yes	OK	1885.8	1745.38	2026.22	1657.9	1832.86	1951.3	2101.14
ENSG00000240891	PLCXD2	257068	phosphatidylinositol specific phospholipase C X domain containing 2	chr3:111674675-111846447	+	-0.340748	0.114746	-2.96958	0.0029821	0.0388382	Yes	OK	72.1357	94.5773	49.6941	96.3098	92.8447	40.4465	58.9417
ENSG00000000971	CFH	3075	complement factor H	chr1:196651877-196747504	+	-0.201335	0.0678577	-2.96701	0.00300711	0.0390839	Yes	OK	1665.44	1795.27	1535.61	1850.52	1740.02	1459.03	1612.19
ENSG00000173039	RELA	5970	RELA proto-oncogene, NF-kB subunit	chr11:65653595-65662972	-	0.147444	0.0497018	2.96656	0.00301149	0.0390839	Yes	OK	3649.48	3453.97	3845	3403.86	3504.07	3807.89	3882.11
ENSG00000244462	RBM12	10137	RNA binding motif protein 12	chr20:35648924-35664956	-	0.180076	0.0607059	2.96637	0.00301336	0.0390839	Yes	OK	1884.05	1757.57	2010.53	1739.08	1776.06	1999.64	2021.43
ENSG00000124212	PTGIS	5740	prostaglandin I2 synthase	chr20:49503873-49568170	-	-0.295309	0.0995525	-2.96636	0.00301346	0.0390839	Yes	OK	457.091	518.017	396.166	500.811	535.223	365.005	427.327
ENSG00000125965	GDF5	8200	growth differentiation factor 5	chr20:35433348-35454746	-	-0.349144	0.117708	-2.96618	0.00301522	0.0390839	Yes	OK	105.19	133.742	76.6388	126.579	140.906	60.1766	93.1011
ENSG00000170004	CHD3	1107	chromodomain helicase DNA binding protein 3	chr17:7888850-7912757	+	-0.144418	0.0487129	-2.96467	0.00303006	0.0392392	Yes	OK	6783.99	7142.52	6425.46	7457.13	6827.91	6305.71	6545.21
ENSG00000079999	KEAP1	9817	kelch like ECH associated protein 1	chr19:10486119-10502805	-	0.156139	0.0526855	2.96361	0.0030405	0.0393371	Yes	OK	3288.21	3102	3474.41	3088.79	3115.21	3374.82	3574.01
ENSG00000185344	ATP6V0A2	23545	ATPase H+ transporting V0 subunit a2	chr12:123712317-123761754	+	0.246191	0.0830957	2.96274	0.0030491	0.0394112	Yes	OK	920.467	827.317	1013.62	799.371	855.264	1084.16	943.067
ENSG00000134531	EMP1	2012	epithelial membrane protein 1	chr12:13196667-13216774	+	0.262435	0.0886668	2.95979	0.00307849	0.0397537	Yes	OK	11939.8	10637.9	13241.6	10484	10791.8	14208.6	12274.6
ENSG00000163938	GNL3	26354	G protein nucleolar 3	chr3:52685919-52694494	+	0.160346	0.0541868	2.95914	0.00308499	0.0398001	Yes	OK	2658.87	2502.3	2815.44	2505.43	2499.16	2837.18	2793.7
ENSG00000088832	FKBP1A	2280	FK506 binding protein 1A	chr20:1368976-1393172	-	-0.122533	0.0414177	-2.95848	0.00309156	0.0398474	Yes	OK	7512.52	7842.8	7182.25	7882.27	7803.33	7131.41	7233.08
ENSG00000088832	MIR6869	102465524	microRNA 6869	chr20:1392899-1392961	-	-0.122533	0.0414177	-2.95848	0.00309156	0.0398474	Yes	OK	7512.52	7842.8	7182.25	7882.27	7803.33	7131.41	7233.08
ENSG00000157064	NMNAT2	23057	nicotinamide nucleotide adenylyltransferase 2	chr1:183248236-183304874	-	-0.219986	0.0743686	-2.95805	0.00309595	0.0398665	Yes	OK	1254.39	1360.74	1148.05	1402	1319.49	1214.38	1081.71
ENSG00000033100	CHPF2	54480	chondroitin polymerizing factor 2	chr7:151232488-151238827	+	0.125003	0.0422879	2.95601	0.00311645	0.0400929	Yes	OK	9822	9381.38	10262.6	9160.44	9602.33	10148.1	10377.1
ENSG00000033100	MIR671	768213	microRNA 671	chr7:151238420-151238538	+	0.125003	0.0422879	2.95601	0.00311645	0.0400929	Yes	OK	9822	9381.38	10262.6	9160.44	9602.33	10148.1	10377.1
ENSG00000139304	PTPRQ	374462	protein tyrosine phosphatase, receptor type Q	chr12:80444345-80680189	+	-0.311533	0.105436	-2.95471	0.00312967	0.0402252	Yes	OK	42.7251	59.1935	26.2567	55.0342	63.3529	21.703	30.8104
ENSG00000160691	SHC1	6464	SHC adaptor protein 1	chr1:154962297-154974483	-	-0.124939	0.0423061	-2.95322	0.00314477	0.0403814	Yes	OK	11470.3	11982.7	10958	11667.2	12298.1	10839.7	11076.3
ENSG00000082996	RNF13	11342	ring finger protein 13	chr3:149812687-149962138	+	0.221205	0.0749254	2.95234	0.00315379	0.0404594	Yes	OK	1093.07	998.25	1187.9	1011.25	985.246	1233.13	1142.66
ENSG00000133119	RFC3	5983	replication factor C subunit 3	chr13:33818068-33966558	+	-0.253524	0.0858881	-2.95179	0.00315936	0.0404676	Yes	OK	688.853	760.803	616.903	758.096	763.511	596.833	636.972
ENSG00000020181	ADGRA2	25960	adhesion G protein-coupled receptor A2	chr8:37796882-37843986	+	-0.210125	0.0711878	-2.9517	0.00316033	0.0404676	Yes	OK	1405.34	1520.17	1290.52	1496.93	1543.41	1217.34	1363.7
ENSG00000134285	FKBP11	51303	FK506 binding protein 11	chr12:48923125-48925547	-	-0.189945	0.0643661	-2.951	0.00316743	0.0404937	Yes	OK	1922.66	2058.06	1787.26	2052.77	2063.34	1879.28	1695.24
ENSG00000187193	MT1X	4501	metallothionein 1X	chr16:56682469-56684196	+	0.253344	0.0858526	2.95092	0.00316828	0.0404937	Yes	OK	694.029	621.863	766.195	628.765	614.96	786.241	746.148
ENSG00000112406	HECA	51696	hdc homolog, cell cycle regulator	chr6:139135111-139180809	+	0.20741	0.0703337	2.94895	0.00318859	0.0407154	Yes	OK	1247.22	1147.45	1347	1144.71	1150.18	1375.18	1318.82
ENSG00000143878	RHOB	388	ras homolog family member B	chr2:20447070-20449443	+	-0.126861	0.0430485	-2.94692	0.00320956	0.0409451	Yes	OK	6319.29	6607.54	6031.04	6696.28	6518.79	6041.33	6020.76
ENSG00000129534	MIS18BP1	55320	MIS18 binding protein 1	chr14:45203189-45253402	-	-0.226634	0.076923	-2.94624	0.00321658	0.0409964	Yes	OK	968.146	1054.28	882.011	1025.01	1083.55	865.161	898.861
ENSG00000089280	FUS	2521	FUS RNA binding protein	chr16:31180109-31194871	+	-0.140089	0.0475608	-2.94546	0.0032247	0.0410618	Yes	OK	8291.04	8710.53	7871.55	9004.96	8416.1	8120.87	7622.23
ENSG00000126777	KTN1	3895	kinectin 1	chr14:55580206-55684584	+	0.116756	0.0396487	2.94476	0.00323205	0.041087	Yes	OK	10284.8	9855.81	10713.8	9831.85	9879.77	10770.6	10657.1
ENSG00000136813	KIAA0368	23392	KIAA0368	chr9:111360692-111484745	-	0.13433	0.0456176	2.9447	0.00323267	0.041087	Yes	OK	5616.09	5342.54	5889.63	5338.31	5346.76	6032.45	5746.81
ENSG00000140941	MAP1LC3B	81631	microtubule associated protein 1 light chain 3 beta	chr16:87392194-87404774	+	0.134918	0.0458307	2.94384	0.00324164	0.0411628	Yes	OK	4816.97	4581.53	5052.42	4525.18	4637.87	5085.41	5019.42
ENSG00000168268	NT5DC2	64943	5'-nucleotidase domain containing 2	chr3:52524368-52533777	-	-0.136582	0.046401	-2.94352	0.00324499	0.0411672	Yes	OK	4865.39	5104.96	4625.82	5014.99	5194.94	4570.46	4681.17
ENSG00000081059	TCF7	6932	transcription factor 7 (T-cell specific, HMG-box)	chr5:134115606-134148229	+	0.158979	0.054037	2.94205	0.00326049	0.0413257	Yes	OK	2890.61	2723.9	3057.31	2758.59	2689.22	2992.06	3122.57
ENSG00000188312	CENPP	401541	centromere protein P	chr9:92325467-92615155	+	-0.344073	0.116966	-2.94165	0.00326473	0.0413412	Yes	OK	159.053	191.481	126.626	193.995	188.966	123.313	129.94
ENSG00000040275	SPDL1	54908	spindle apparatus coiled-coil protein 1	chr5:169583633-169604777	+	-0.222223	0.0756475	-2.93761	0.00330748	0.0418149	Yes	OK	1007.38	1095.7	919.07	1108.94	1082.46	895.743	942.397
ENSG00000074696	HACD3	51495	3-hydroxyacyl-CoA dehydratase 3	chr15:65530488-65578355	+	0.130045	0.0442701	2.93754	0.00330824	0.0418149	Yes	OK	6069.47	5786.35	6352.6	5892.78	5679.91	6417.19	6288.01
ENSG00000165233	CARD19	84270	caspase recruitment domain family member 19	chr9:93096122-93113295	+	0.208185	0.070925	2.93528	0.00333243	0.0420819	Yes	OK	1221.37	1123.98	1318.76	1150.21	1097.75	1332.76	1304.75
ENSG00000100029	PES1	23481	pescadillo ribosomal biogenesis factor 1	chr22:30576624-30591940	-	0.151569	0.0516665	2.9336	0.00335054	0.0422717	Yes	OK	3101.86	2929.82	3273.91	2907.18	2952.46	3291.95	3255.86
ENSG00000239306	RBM14	10432	RNA binding motif protein 14	chr11:66616581-66629926	+	-0.198791	0.0678303	-2.93071	0.00338186	0.0426276	Yes	OK	1365.52	1468.48	1262.55	1440.52	1496.44	1253.84	1271.26
ENSG00000182979	MTA1	9112	metastasis associated 1	chr14:105419848-105470720	+	0.189742	0.0647977	2.92823	0.00340903	0.0429306	Yes	OK	1636.04	1519.89	1752.19	1568.47	1471.32	1760.9	1743.47
ENSG00000123094	RASSF8	11228	Ras association domain family member 8	chr12:25959030-26072874	+	0.19204	0.0655999	2.92744	0.00341763	0.0429994	Yes	OK	2765.41	2561.85	2968.96	2510.93	2612.76	3203.17	2734.76
ENSG00000047346	FAM214A	56204	family with sequence similarity 214 member A	chr15:52581320-52652050	-	-0.202279	0.069108	-2.92701	0.00342243	0.0430203	Yes	OK	1274.33	1372.59	1176.07	1357.97	1387.21	1171.96	1180.17
ENSG00000137942	FNBP1L	54874	formin binding protein 1 like	chr1:93448130-93554661	+	-0.271696	0.0928474	-2.92626	0.00343061	0.0430837	Yes	OK	526	587.188	464.811	594.369	580.006	456.75	472.873
ENSG00000111300	NAA25	80018	N(alpha)-acetyltransferase 25, NatB auxiliary subunit	chr12:112026688-112108831	-	0.17045	0.0582622	2.92556	0.00343835	0.0431414	Yes	OK	2449.85	2293.82	2605.89	2294.92	2292.72	2700.05	2511.72
ENSG00000183722	LHFP	10186	lipoma HMGIC fusion partner	chr13:39342891-39603219	-	-0.19398	0.0663521	-2.92349	0.00346128	0.0433497	Yes	OK	1678.95	1803.13	1554.78	1762.47	1843.79	1486.66	1622.91
ENSG00000165802	NSMF	26012	NMDA receptor synaptonuclear signaling and neuronal migration factor	chr9:137447570-137459334	-	0.192982	0.0660474	2.92187	0.00347941	0.0435343	Yes	OK	1527.5	1415.11	1639.89	1373.1	1457.12	1645.48	1634.29
ENSG00000165802	MIR7114	102466223	microRNA 7114	chr9:137450025-137450086	-	0.192982	0.0660474	2.92187	0.00347941	0.0435343	Yes	OK	1527.5	1415.11	1639.89	1373.1	1457.12	1645.48	1634.29
ENSG00000111665	CDCA3	83461	cell division cycle associated 3	chr12:6848807-6851930	-	-0.329018	0.112616	-2.9216	0.00348236	0.0435343	Yes	OK	231.419	270.824	192.013	269.667	271.98	205.192	178.834
ENSG00000111142	METAP2	10988	methionyl aminopeptidase 2	chr12:95474045-95515837	+	0.139775	0.047864	2.92026	0.00349739	0.0436824	Yes	OK	4208.26	3995.47	4421.06	4047.76	3943.17	4475.75	4366.37
ENSG00000140455	USP3	9960	ubiquitin specific peptidase 3	chr15:63504510-63594640	+	0.246555	0.0844415	2.91983	0.00350222	0.0437028	Yes	OK	780.559	701.179	859.939	661.786	740.573	879.959	839.919
ENSG00000103995	CEP152	22995	centrosomal protein 152	chr15:48737937-48811146	-	-0.322412	0.110451	-2.91906	0.00351091	0.0437715	Yes	OK	326.559	378.734	274.384	389.367	368.102	315.68	233.088
ENSG00000163686	ABHD6	57406	abhydrolase domain containing 6	chr3:58237501-58294736	+	0.281856	0.096618	2.91722	0.00353163	0.0439898	Yes	OK	460.637	403.899	517.374	400.374	407.424	512.98	521.768
ENSG00000119397	CNTRL	11064	centriolin	chr9:121121769-121177610	+	-0.313189	0.107395	-2.91625	0.0035427	0.0440876	Yes	OK	302.673	347.94	257.406	334.333	361.548	268.328	246.483
ENSG00000164308	ERAP2	64167	endoplasmic reticulum aminopeptidase 2	chr5:96875938-96919716	+	-0.214108	0.0734993	-2.91306	0.00357908	0.0445	Yes	OK	1129.47	1223.56	1035.38	1268.54	1178.58	1048.65	1022.1
ENSG00000253982	LOC101927752	101927752	uncharacterized LOC101927752	chr8:1761962-1763334	-	0.280788	0.0964439	2.91141	0.00359801	0.0446873	Yes	OK	472.9	415.352	530.448	432.018	398.686	529.751	531.145
ENSG00000168994	PXDC1	221749	PX domain containing 1	chr6:3722601-3752012	-	0.209449	0.0719465	2.91118	0.00360066	0.0446873	Yes	OK	1705.28	1567.58	1842.98	1469.41	1665.74	1738.21	1947.75
ENSG00000108518	PFN1	5216	profilin 1	chr17:4945649-4949086	-	-0.121977	0.041907	-2.91066	0.00360672	0.0447043	Yes	OK	15493	16172.6	14813.5	16330	16015.2	14422.6	15204.3
ENSG00000174748	RPL15	6138	ribosomal protein L15	chr3:23916803-23920856	+	0.11442	0.0393129	2.9105	0.00360855	0.0447043	Yes	OK	13616.9	13060.7	14173	12906.9	13214.5	14125.7	14220.3
ENSG00000197043	ANXA6	309	annexin A6	chr5:151100705-151141655	-	-0.12285	0.0422407	-2.90833	0.00363365	0.0449746	Yes	OK	12508.5	13060.6	11956.4	12942.7	13178.5	11634.8	12278
ENSG00000176046	NUPR1	26471	nuclear protein 1, transcriptional regulator	chr16:28537340-28539174	-	0.324478	0.111611	2.90724	0.00364639	0.0450916	Yes	OK	1481.17	1233.24	1729.09	1086.92	1379.56	1723.42	1734.76
ENSG00000163710	PCOLCE2	26577	procollagen C-endopeptidase enhancer 2	chr3:142817859-142889203	-	-0.18262	0.0628253	-2.90679	0.00365157	0.0450995	Yes	OK	1738.92	1858.81	1619.04	1862.91	1854.71	1582.35	1655.73
ENSG00000154040	CABYR	26256	calcium binding tyrosine phosphorylation regulated	chr18:24138955-24161600	+	-0.33751	0.116133	-2.90625	0.00365794	0.0450995	Yes	OK	173.054	206.39	139.718	200.875	211.904	138.11	141.326
ENSG00000104823	ECH1	1891	enoyl-CoA hydratase 1	chr19:38815421-38831857	-	0.187356	0.0644674	2.90621	0.0036584	0.0450995	Yes	OK	1563.95	1453.65	1674.25	1455.65	1451.65	1678.04	1670.46
ENSG00000166046	TCP11L2	255394	t-complex 11 like 2	chr12:106302790-106347014	+	0.329691	0.11345	2.90605	0.00366018	0.0450995	Yes	OK	215.805	177.602	254.008	170.606	184.597	255.504	252.512
ENSG00000129625	REEP5	7905	receptor accessory protein 5	chr5:112876383-112922334	-	0.123677	0.0425886	2.904	0.00368431	0.045356	Yes	OK	6483.37	6195.12	6771.62	6139.06	6251.18	6791.07	6752.17
ENSG00000027697	IFNGR1	3459	interferon gamma receptor 1	chr6:137197483-137219430	-	0.187449	0.0645597	2.90349	0.00369024	0.0453883	Yes	OK	2757.2	2560.3	2954.11	2570.1	2550.5	3179.49	2728.73
ENSG00000022840	RNF10	9921	ring finger protein 10	chr12:120534328-120577594	+	0.143329	0.0493942	2.90174	0.00371091	0.0455948	Yes	OK	4307.25	4085	4529.51	4073.9	4096.09	4391.9	4667.11
ENSG00000177426	TGIF1	7050	TGFB induced factor homeobox 1	chr18:3453773-3458408	+	0.231624	0.0798346	2.9013	0.00371613	0.0455948	Yes	OK	1032.11	935.695	1128.52	934.205	937.186	1207.48	1049.56
ENSG00000129484	PARP2	10038	poly(ADP-ribose) polymerase 2	chr14:20343613-20357904	+	-0.215076	0.0741326	-2.90123	0.003717	0.0455948	Yes	OK	1048.63	1136.71	960.545	1157.09	1116.32	955.919	965.17
ENSG00000213563	C8orf82	414919	chromosome 8 open reading frame 82	chr8:144526218-144529074	-	0.282834	0.0975181	2.90033	0.00372776	0.0456858	Yes	OK	460.656	403.615	517.696	397.622	409.609	496.21	539.182
ENSG00000066135	KDM4A	9682	lysine demethylase 4A	chr1:43650125-43705518	+	-0.173825	0.0599445	-2.89976	0.0037345	0.0457276	Yes	OK	1977.56	2105.7	1849.43	2085.79	2125.6	1820.09	1878.77
ENSG00000104885	DOT1L	84444	DOT1 like histone lysine methyltransferase	chr19:2164148-2232578	+	0.210565	0.0726403	2.89874	0.00374666	0.0458356	Yes	OK	1258.24	1156.15	1360.34	1208	1104.31	1399.84	1320.83
ENSG00000153956	CACNA2D1	781	calcium voltage-gated channel auxiliary subunit alpha2delta 1	chr7:82050335-82443806	-	-0.182429	0.0629537	-2.89782	0.00375766	0.0458882	Yes	OK	1877.95	2004.75	1751.15	2001.87	2007.63	1819.11	1683.19
ENSG00000182831	C16orf72	29035	chromosome 16 open reading frame 72	chr16:9091679-9119698	+	0.153997	0.0531607	2.89682	0.00376969	0.0459682	Yes	OK	3035.74	2863.3	3208.18	2791.61	2934.99	3228.82	3187.54
ENSG00000165490	DDIAS	220042	DNA damage induced apoptosis suppressor	chr11:82901694-82934657	+	-0.306677	0.105878	-2.89651	0.00377339	0.0459682	Yes	OK	325.122	371.976	278.268	371.481	372.471	293.977	262.558
ENSG00000187790	FANCM	57697	Fanconi anemia complementation group M	chr14:45135938-45200890	+	-0.300634	0.103795	-2.89644	0.00377426	0.0459682	Yes	OK	349.309	397.687	300.932	382.487	412.886	305.815	296.048
ENSG00000117410	ATP6V0B	533	ATPase H+ transporting V0 subunit b	chr1:43974647-43978300	+	0.130715	0.0451578	2.89462	0.00379618	0.0461942	Yes	OK	4888.44	4658.14	5118.73	4638	4678.28	5120.93	5116.54
ENSG00000049540	ELN	2006	elastin	chr7:74027788-74069906	+	-0.260694	0.0901589	-2.89149	0.00383416	0.0466149	Yes	OK	789.131	876.885	701.377	872.291	881.479	624.455	778.298
ENSG00000198561	CTNND1	1500	catenin delta 1	chr11:57761761-57819180	+	-0.123907	0.0429103	-2.88758	0.00388223	0.0471576	Yes	OK	7334.38	7661.17	7007.59	7587.83	7734.51	6877.88	7137.3
ENSG00000120437	ACAT2	39	acetyl-CoA acetyltransferase 2	chr6:159762478-159779112	+	-0.259609	0.0899552	-2.88598	0.00390203	0.0473421	Yes	OK	667.848	738.953	596.744	720.947	756.958	640.239	553.248
ENSG00000188042	ARL4C	10123	ADP ribosylation factor like GTPase 4C	chr2:234493040-234497049	-	0.198256	0.068702	2.88574	0.00390497	0.0473421	Yes	OK	2478.31	2294.32	2662.29	2389.86	2198.78	2448.5	2876.09
ENSG00000228716	DHFR	1719	dihydrofolate reductase	chr5:80626225-80654981	-	-0.317422	0.110006	-2.88551	0.00390778	0.0473421	Yes	OK	264.832	306.67	222.995	288.929	324.41	222.949	223.041
ENSG00000170054	SERPINA9	327657	serpin family A member 9	chr14:94462720-94476333	-	-0.333189	0.115526	-2.88409	0.00392542	0.0475139	Yes	OK	71.2159	91.6838	50.748	89.4305	93.937	53.271	48.225
ENSG00000157227	MMP14	4323	matrix metallopeptidase 14	chr14:22836532-22847599	+	0.116346	0.0403564	2.88296	0.0039396	0.0476435	Yes	OK	98746.2	94644.1	102848	95108.7	94179.5	103469	102228
ENSG00000183597	TANGO2	128989	transport and golgi organization 2 homolog	chr22:20021068-20067164	+	0.191014	0.0662723	2.88226	0.00394833	0.0477069	Yes	OK	1640.6	1522.13	1759.08	1473.54	1570.71	1703.69	1814.47
ENSG00000123737	EXOSC9	5393	exosome component 9	chr4:121801316-121817021	+	-0.210161	0.0729256	-2.88185	0.00395343	0.0477265	Yes	OK	1249.8	1350.89	1148.71	1396.49	1305.29	1197.61	1099.8
ENSG00000130764	LRRC47	57470	leucine rich repeat containing 47	chr1:3780219-3796504	-	0.180278	0.0625784	2.88084	0.00396623	0.0478389	Yes	OK	1746.98	1629.98	1863.98	1651.02	1608.94	1839.82	1888.14
ENSG00000106268	NUDT1	4521	nudix hydrolase 1	chr7:2242221-2251145	+	-0.290782	0.100955	-2.88031	0.00397284	0.0478765	Yes	OK	407.435	461.596	353.274	456.784	466.408	331.464	375.083
ENSG00000123358	NR4A1	3164	nuclear receptor subfamily 4 group A member 1	chr12:52022831-52059507	+	0.294332	0.102222	2.87933	0.00398518	0.0479553	Yes	OK	381.341	330.485	432.197	339.836	321.134	416.303	448.091
ENSG00000133872	SARAF	51669	store-operated calcium entry associated regulatory factor	chr8:30063011-30083208	-	0.117243	0.0407202	2.87924	0.00398637	0.0479553	Yes	OK	9430.23	9036.1	9824.36	9164.56	8907.63	9861.06	9787.67
ENSG00000113719	ERGIC1	57222	endoplasmic reticulum-golgi intermediate compartment 1	chr5:172834219-172952685	+	-0.120312	0.0417903	-2.87894	0.0039901	0.0479582	Yes	OK	12091.9	12614.5	11569.4	12546.4	12682.6	11276.7	11862
ENSG00000123610	TNFAIP6	7130	TNF alpha induced protein 6	chr2:151357591-151380048	+	0.303527	0.105463	2.87804	0.00400153	0.0480533	Yes	OK	330.918	283.023	378.814	282.05	283.996	394.6	363.027
ENSG00000118523	CTGF	1490	connective tissue growth factor	chr6:131948176-131951378	-	-0.337848	0.1175	-2.87529	0.00403651	0.0483988	Yes	OK	9666.42	11647	7685.89	10815.6	12478.3	6718.07	8653.71
ENSG00000111725	PRKAB1	5564	protein kinase AMP-activated non-catalytic subunit beta 1	chr12:119667955-119681624	+	0.230532	0.0801785	2.87523	0.00403735	0.0483988	Yes	OK	910.336	825.763	994.908	821.385	830.141	1042.73	947.086
ENSG00000095203	EPB41L4B	54566	erythrocyte membrane protein band 4.1 like 4B	chr9:109239726-109320964	-	-0.316759	0.110207	-2.87423	0.00405009	0.0485091	Yes	OK	54.0439	72.5267	35.5611	78.4237	66.6297	29.595	41.5271
ENSG00000162643	WDR63	126820	WD repeat domain 63	chr1:85062297-85133138	+	-0.318571	0.11085	-2.8739	0.00405436	0.0485179	Yes	OK	245.706	285.491	205.921	284.802	286.18	204.206	207.635
ENSG00000143476	DTL	51514	denticleless E3 ubiquitin protein ligase homolog	chr1:212035552-212105006	+	-0.271979	0.0946707	-2.87289	0.00406734	0.0486308	Yes	OK	777.941	871.355	684.528	961.722	780.988	617.55	751.506
ENSG00000175727	MLXIP	22877	MLX interacting protein	chr12:122078727-122147347	+	0.15954	0.0555695	2.87099	0.00409186	0.0488813	Yes	OK	2779.38	2616.81	2941.95	2567.34	2666.28	2863.81	3020.09
ENSG00000160695	VPS11	55823	VPS11, CORVET/HOPS core subunit	chr11:119067751-119081978	+	0.193522	0.0674411	2.86949	0.00411132	0.049071	Yes	OK	1413.53	1309.96	1517.1	1296.05	1323.86	1487.64	1546.55
ENSG00000125124	BBS2	583	Bardet-Biedl syndrome 2	chr16:56484346-56520096	-	-0.183241	0.06388	-2.86852	0.00412396	0.0491791	Yes	OK	1617.09	1728.69	1505.49	1755.59	1701.79	1511.32	1499.66
ENSG00000158470	B4GALT5	9334	beta-1,4-galactosyltransferase 5	chr20:49632945-49713884	-	-0.145886	0.050863	-2.86821	0.00412802	0.0491848	Yes	OK	3507.46	3692.43	3322.49	3709.3	3675.56	3398.5	3246.48
ENSG00000198832	SELENOM	140606	selenoprotein M	chr22:31104776-31107565	-	0.158186	0.055161	2.86772	0.00413445	0.0492186	Yes	OK	3186.8	3004.05	3369.54	3039.26	2968.85	3234.74	3504.35
ENSG00000113360	DROSHA	29102	drosha ribonuclease III	chr5:31400494-31532175	-	-0.162824	0.056789	-2.86717	0.0041416	0.049261	Yes	OK	2609.58	2768.31	2450.85	2802.61	2734	2370.56	2531.14
ENSG00000196247	ZNF107	51427	zinc finger protein 107	chr7:64666082-64711582	+	-0.311141	0.108529	-2.86689	0.00414533	0.0492626	Yes	OK	318.148	365.785	270.511	359.098	372.471	299.896	241.125
ENSG00000171320	ESCO2	157570	establishment of sister chromatid cohesion N-acetyltransferase 2	chr8:27774540-27804907	+	-0.320287	0.111867	-2.86311	0.00419505	0.0498103	Yes	OK	260.73	304.732	216.728	317.822	291.642	194.341	239.116
