# Supplementary material for: Chromatin Reprogramming via Contact Guidance-Induced Nuclear Deformation Promotes Stem Cell Differentiation
Source: Research Square preprint supplement (doi:10.21203/rs.3.rs-155599/v1), 2021-02-04
Supplement: Supplementary file 4 [file 8a4e21af32a29b9e51db9e69.xlsx]

## Sheet: Fig 1D
Nuclear NSI (Flat)	Nuclear NSI (Pillar)
0.843	0.638
0.89	0.712
0.901	0.795
0.9	0.678
0.841	0.626
0.851	0.45
0.899	0.726
0.889	0.787
0.879	0.592
0.853	0.588
0.85	0.764
0.869	0.675
0.849	0.622
0.909	0.626
0.858	0.669
0.862	0.756
0.901	0.539
0.886	0.554
0.92	0.448
0.876	0.629
0.842	0.602
0.835	0.651
0.886	0.75
0.863	0.681
0.91	0.587
0.89	0.848
0.91	0.794
0.847	0.692
0.868	0.624
0.909	0.904
0.9	0.815
0.883	0.795
0.883	0.815
0.901	0.66
0.921	0.726
0.884	0.767
0.885	0.737
0.862	0.776
0.878	0.768
0.87	0.73
0.851	0.728
0.83	0.625
0.818	0.771
0.92	0.738
0.887	0.542
0.874	0.643
0.864	0.7
0.898	0.755
0.686	0.721
0.841	0.702
0.92	0.7
0.884	0.68
0.899	0.738
0.861	0.718
0.869	0.714
0.897	0.707
0.823	0.721
0.834	0.743
0.745	0.694
0.811	0.77
0.869	0.735
0.826	0.745
0.868	0.648
0.871	0.69
0.894	0.703
0.901	0.656
0.882	0.654
0.889	0.667
0.809	0.618
0.864	0.671
0.888	0.791
0.881	0.534
0.867	0.75
0.836	0.773
0.861	0.628
0.892	0.692
0.82	0.679
0.602	0.657
0.837	0.767
0.895	0.69
0.86	0.659
0.89	0.684
0.911	0.671
0.885	0.644
0.877	0.598
0.898	0.708
0.873	0.724
0.897	0.688
0.88	0.704
0.884	0.693
0.889	0.656
0.848	0.684
0.875	0.689
0.922	0.662
0.827	0.615
0.861	0.701
0.851	0.622
0.858	0.687
0.889	0.664
0.912	0.615
0.899	0.68
0.859	0.68
0.807	0.647
0.896	0.621
0.866	0.59
0.886	0.579
0.871	0.575
0.834	0.58
0.868	0.657
0.818	0.67
0.753	0.639
0.879	0.685
0.792	0.672
0.893	0.61
0.932	0.701
0.905	0.618
0.903	0.676
0.86	0.626
0.867	0.597
0.816	0.602
0.884	0.496
0.894	0.6
0.822	0.688
0.885	0.609
0.888	0.672
0.865	0.591
0.856	0.636
0.769	0.523
0.869	0.597
0.855	0.752
0.92	0.578
0.901	0.577
0.845	0.596
0.766	0.567
0.902	0.621
0.866	0.526
0.917	0.701
0.798	0.539
0.9	0.578
0.812	0.64
0.887	0.584
0.823	0.629
0.894	0.56
0.828	0.438
0.808	0.548
0.835	0.604
0.846	0.545
0.835	0.566
0.862	0.588
0.864	0.602
0.817	0.503
0.863	0.504
0.925	0.562
0.861	0.817
0.859	0.516
0.889	0.542
0.915	0.461
0.918	0.576
0.876	0.742
0.765	0.474
0.855	0.788
0.841	0.606
0.852	0.638
0.874	0.511
0.878	0.669
0.907	0.78
0.889	0.752
0.869	0.686
0.922	0.448
0.901	0.483
0.833	0.799
0.914	0.843
0.894	0.432
0.795	0.49
0.89	0.483
0.791	0.736
0.905	0.473
0.904	0.791
0.86	0.46
0.824	0.54
0.835	0.66
0.913	0.62
0.861	0.62
0.895	0.44
0.91	0.6
0.871	0.61
0.906	0.66
0.908	0.52
0.891	0.54
0.866	0.55
0.91	0.5
0.926	0.73
0.882	0.65
0.807	0.75
0.878	0.57
0.818	0.67
0.882	0.71
0.86	0.6
0.81	0.61
0.849	0.5
0.886	0.52
0.952	0.63
0.877	0.64
0.89	0.65
0.872	0.59
0.817	0.49
0.875	0.55
0.916	0.67
0.858	0.74
0.82	0.83
0.892	0.75
0.61	0.72
0.7	0.61
0.88	0.45
0.9	0.57
0.89	0.62
0.76	0.47
0.73	0.66
0.72	0.55
0.85	0.83
0.67	0.66
0.89	0.75
0.84	0.4
0.89	0.7
0.69	0.63
0.88	0.6
0.9	0.64
0.75	0.75
0.79	0.59
0.72	0.74
0.92	0.76
0.64	0.71
0.94	0.61
0.91	0.51
0.69	0.67
0.91	0.54
0.93	0.73
0.88	0.66
0.89	0.57
0.9	0.84
0.89	0.5
0.9	0.68
0.9	0.57
0.83	0.73
0.83	0.71
0.88	0.65
0.66	0.7
0.68	0.41
0.91	0.83
0.8	0.7
0.77	0.56
0.87	0.41
0.67	0.73
0.91	0.72
0.78	0.55
0.93	0.68
0.93	0.66
0.88	0.62
0.89	0.58
0.88	0.61
0.82	0.78
0.82	0.66
0.83	0.68
0.88	0.72
0.9	0.67
0.86	0.58
0.76	0.48
0.76	0.69
0.86	0.56
0.91	0.48
0.64	0.53
0.81	0.6
0.84	0.6
	0.69
	0.61
	0.56
	0.58
	0.62
	0.53
	0.74
	0.63
	0.72
	0.31
	0.66
	0.48
	0.7
	0.77
	0.54
	0.55
	0.71
	0.51
	0.44
	0.53
	0.59
	0.72

## Sheet: Fig 1G
Nuclear Volume (Flat, μm3)	Nuclear Volume (Pillar, μm3)
712.88	394.936
491.489	510.9
622.856	423.417
586.43	340.797
782.367	287.752
597.997	463.379
528.11	430.795
552.589	425.776
411.476	346.386
341.346	269.575
757.671	328.618
489.852	255.215
432.045	377.787
701.608	312.264
652.342	317.389
536.991	597.017
818.34	195.944
576.119	576.936
570.901	252.234
452.019	300.111
439.578	413.321
593.686	440.923
662.426	406.482
673.583	292.785
537.45	301.683
549.337	468.316
501.478	331.469
792.12	287.849
1055.92	306.69
830.626	235.678
713.658	384.816
470.237	421.748
676.262	359.733
	310.25

## Sheet: Fig 1H
Nuclear Surface Area (Flat, μm2)	Nuclear Surface Area (Pillar, μm2)
861.264	501.269
676.7	648.858
835.005	570.303
751.773	455.575
933.645	420.99
924.799	644.887
674.365	489.413
793.334	512.349
553.682	475.822
617.826	350.862
939.505	424.825
693.783	361.785
622.605	513.873
1101.41	412.637
923.786	463.796
743.532	629.674
1472.95	318.811
1018.54	642.198
857.596	592.656
891.266	493.425
687.887	496.856
867.078	558.275
1006.27	508.543
855.968	418.509
727.287	448.044
752.226	516.269
778.461	481.784
1420.92	398.991
1319.05	418.469
953.293	353.284
1118.8	556.336
701.861	529.739
892.713	455.734
	433.297

## Sheet: Fig 1L
Convex/Concave Intensity Ratio (xy, Flat)	Convex/Concave Intensity Ratio (xy, Pillar)
0.99381	0.48063
0.96975	0.51639
0.95769	0.58171
0.93859	0.52737
0.93729	0.53981
0.9372	0.35672
0.94804	0.39978
0.98895	0.85935
0.90753	0.37405
0.96592	0.4879
0.9233	0.53273
0.99373	0.61588
0.98994	0.43519
0.98097	0.52908
0.97905	0.39881
0.99489	0.53394
0.98226	0.50765
0.89719	0.57411
0.85984	0.40861
0.94651	0.58606
0.92332	0.48163
0.99094	0.33778
0.9969	0.44046
0.98156	0.48482
0.9647	0.35618
	0.47768

## Sheet: Fig 1M
Basal/Apical Intensity Ratio (yz, Flat)	Basal/Apical Intensity Ratio (yz, Pillar)
0.385436	0.546874
0.457329	0.771942
0.262411	0.774509
0.47055	0.533333
0.433333	0.989236
0.660949	0.664687
0.265662	0.943663
0.288659	0.778087
0.524863	0.643746
0.350994	0.588384
0.181682	0.576781
0.205128	0.522882
0.220929	0.492339
0.288	0.626374
0.233199	0.859551
0.244275	0.242099
0.21469	0.373206
0.10357	0.957056
0.1779	0.849566
0.238228	0.934568
0.485714	0.996506
0.158941	0.778993
0.696549	0.768322
0.472527	0.950401
0.0891954	0.520584
	0.861842

## Sheet: Fig 2C
	Protein Band Intensity (Flat)	Protein Band Intensity (Pillar)
H3_1	15924.8	15944.5
H3Ac_1	3472.43	2914.57
H3K27me3_1	260.384	2311.54
H3_2	15278.6	13375.2
H3Ac_2	3175.08	1748.31
H3K27me3_2	412.557	1412.72
H3_3	17638	16613
H3Ac_3	3582.84	2095.76
H3K27me3_3	434.163	2099.33

## Sheet: Fig 2E
Nuclear/plasma HDAC 3 intensity (Flat)	Nuclear/plasma HDAC 3 intensity (Pillar)
3.81438	4.45511
3.0157	8.67391
3.16924	3.77367
3.00122	3.7235
2.09563	2.33581
2.64856	4.69737
4.08815	4.41825
3.30793	3.38649
2.988	4.0031
4.24587	3.92756
1.80647	3.91647
3.59782	4.38328
4.57136	5.6815
2.23559	6.96747
2.66685	4.67498
4.18687	2.62237
4.15264	4.18256
3.43895	6.94986
3.78224	8.22745
3.44213	5.57433
3.06023	8.63885
3.43953	4.38177
3.25344	5.34367
4.36883	6.89262
3.56597	2.60953
1.66035	4.98434
1.23067	3.38474
1.72449	2.72363
1.74863	2.61474
2.63682	4.51297
1.8488	2.81315
1.90937	3.1999
1.66895	3.84067
1.66895	3.28405
1.8314	4.6207
1.54732	2.24827
1.45374	3.44393
1.44745	3.21829
1.77614	2.74384
2.04993	5.05282
1.60373	2.20328
1.34325	3.34117
1.77797	5.44762
1.87266	3.60393
1.80233	3.16349
1.9035	3.52249
2.16488	2.5711
1.87317	3.57714
2.29094	2.24944
2.80272	2.52742
1.65582	1.74446
2.41709	2.79045
1.46057	3.24486
1.6132	3.16128
2.90525	4.25726
2.16927	3.24079
2.24159	2.56491
3.01871	3.84313
5.47936	3.30168
5.22449	1.95481
1.55789	2.88788
3.57391	2.12068
2.37139	3.10118
4.81788	3.02376
2.45256	2.64988
3.94907	2.55169
2.36056	3.55784
2.13076	2.61604
5.19535	5.46764
3.62775	3.46777
5.56274	6.20924
3.56974	7.57757
3.4027	2.70063
3.28245	2.70063
4.33772	7.43203
2.20223	4.74157
2.98275	4.26555
2.09386	4.08583
1.88509	3.82153
3.50403	1.56526
3.40689	2.01152
3.65555	2.04994
3.01337	3.81653
5.0674	2.93781
4.0461	3.14488
2.89486	2.67308
2.03227	3.01318
2.48554	3.61756
3.7355	5.52532
2.78592	1.76872
3.21084	2.96784
3.43803	3.06231
3.67637	4.2209
2.90895	6.42089
2.97458	2.35978
2.82905	2.58646
3.93858	2.79821
3.2014	2.74288
2.97279	2.73247
2.6186	1.69662
2.1307	1.95012
2.78906	2.8411
2.68239	4.98543
2.96885	2.53954
3.62815	3.69149
3.25651	2.36757
2.49766	2.75385
2.87989	2.65163
2.8017	5.57269
1.73584	4.30682
3.13276	3.38622
2.1746	5.93192
3.23985	3.99393
3.86288	4.90117
2.31653	8.31865
2.88122	3.8993
2.38087	6.86865
2.31795	4.13852
2.46878	4.66786
2.17009	6.50092
2.59962	7.60507
2.78837	5.66873
2.51532	7.95334
2.84592	5.25503
2.62477	8.92571
4.97175	4.38907
3.43307	3.03737
3.48256	3.81036
4.11434	4.46761
2.76645	2.62278
1.79287	3.03969
3.46544	4.813
1.16441	5.37519
1.60242	4.2589
1.5187	6.6079
2.24692	1.70279
1.64959	5.48127
1.07967	5.26579
1.96064	3.01119
1.71145	3.24445
1.5954	3.55541
2.15654	2.19135
1.32792	6.02867
2.69192	5.18427
1.68843	4.88956
2.3308	3.08977
2.09919	6.5773
5.66557	6.54752
3.41895	6.74071
3.9689	6.25445
4.91514	3.77544
4.05083	3.39122
2.49786	3.32903
2.81878	2.54216
3.92617	5.25959
4.65828	2.60817
3.37002	3.37181
6.28704	3.36442
2.18183	3.26502
2.80671	3.77091
2.61127	3.75678
1.77799	3.22756
5.01464	3.58118
1.52017	2.9693
5.88903	3.33962
2.89136	2.0869
1.66941	3.00155
1.75158	3.8434
3.51442	3.5029
2.42628	3.27818
1.74536	2.42488
1.59836	2.43555
1.68509	3.48529
1.58544	2.47004
1.80012	2.81661
1.80769	4.29755
2.40614	3.96966
2.46373	4.19795
2.52782	2.30411
2.23984	3.84488
2.47618	7.74016
2.21268	5.39344
1.63413	7.9404
3.56413	5.64912
4.23366	6.33654
3.92047	8.42797
2.86776	7.66422
1.9961	6.48801
2.01147	2.58092
3.05368	2.38642
2.46624	3.49291
2.06592	4.33638
1.85726	3.67356
2.07232	2.22543
1.89411	2.63853
2.5974	5.12356
2.40316	2.67198
2.19491	3.8939
1.3669	3.83919
2.21552	3.36685
1.71831	2.58691
1.62672	2.52625
2.02605	3.64225
1.97703	2.10404
1.73816	3.55361
1.7318	1.73664
2.52121	2.82718
1.74581	3.1772
2.05804	3.46731
2.00376	2.55574
1.92164	5.06971
1.72794	3.68267
1.7724	4.41339
3.48355	3.44407
4.7954	5.85289
1.88984	1.65837
2.2265	6.57381
1.82079	2.54246
1.63385	3.37938
1.63993	4.7304
2.21456	5.33159
2.0439	4.62543
1.889	6.55633
2.32968	3.26892
1.68165	2.73708
3.09803	2.69738
2.46743	2.64523
2.12037	2.036
2.4088	2.30213
1.97962	1.74802
2.78065	1.94499
5.16094	3.03829
	3.46627
	3.40359
	5.12917
	2.3092
	3.02962
	7.64748

## Sheet: Fig 2G
	Protein Band Intensity (Flat)	Protein Band Intensity (Pillar)
H3_1	26191.1	26486.6
Ezh2_1	6177.58	8593.89
H3_2	23438.6	27559.7
Ezh2_2	6404.58	10889.3
H3_3	24191.4	23678.6
Ezh2_3	5782.53	7173.57

## Sheet: Fig 4
D, MSCs on Flat(PWS)	D,MSCs on Pillar(PWS)		D,MSCs on Day 1 (PWS)			D,MSCs on Day 4 (PWS)			D, MSCs on Day 14 (PWS)			D, Nucleus_Flat (ChromTEM)	D, Nucleus_Pillar(ChromTEM)	D,Peripheral Chromatin_Flat (ChromTEM)	D,Peripheral Chromatin_Pillar(ChromTEM)
2.58906	2.79351		Growth Medium	Osteogenic Medium		Growth Medium	Osteogenic Medium		Growth Medium	Osteogenic Medium		2.60343	2.20053	2.56267	2.2382
2.5811	2.38605		2.69963	2.53322		2.57439	2.70235		2.79598	2.65172		2.29151	2.20762	2.18879	2.28832
2.62857	2.31536		2.62012	2.50376		2.63224	2.72158		2.66529	2.5219		2.25662	1.6669	2.16305	2.10236
2.67432	2.47501		2.6691	2.45055		2.47806	2.77549		2.77387	2.61787		2.53799	1.87391	2.26953	2.19571
2.62857	2.38769		2.65108	2.45409		2.77056	2.6261		2.62927	2.71961		2.35426	2.20284	2.15284	2.05908
2.49465	2.14494		2.28475	2.30954		2.73883	2.65609		2.58048	2.42299		2.39434	2.3815	2.06563	2.34106
2.66983	2.37613		2.58943	2.31508		2.5021	2.60979		2.81633	2.62898		1.97518	1.84214	1.94708	2.27327
2.46581	2.47958		2.53181	2.5279		2.63589	2.73127		2.3822	2.64759		2.27836	2.07107	2.16133	2.26473
2.68425	2.34094		2.61777	2.50117		2.6455	2.65956		2.75034	2.38748		2.65492	2.05081	2.0462	2.04499
2.67432	2.41858		2.65903	2.59186		2.62238	2.60852		2.50517	2.60149		2.41308	1.86079	2.20212	1.94023
2.62238	2.42977		2.50598	2.27695		2.4089	2.68858		2.71521	2.45728		2.3628	2.46807	1.7119	2.47777
2.5811	2.37115		2.48932	2.52181		2.80451	2.49913		2.77891	2.70474		2.24577	1.80711	1.63177	2.09989
2.79725	2.44872		2.67813	2.56457		2.83945	2.71361		2.50846	2.60342		2.05869		1.84485
2.74345	2.53412		2.65829	2.5165		2.71361	2.62362		2.57072	2.66664		2.18887		1.41221
2.68642	2.28247		2.64669	2.62885		2.48564	2.62486		2.66112	2.50441		2.41517		1.7737
2.60339	2.45962		2.68084	2.33203		2.81426	2.69287		2.71544	2.60034		2.28212		1.72962
2.5811	2.35276		2.65573	2.47856		2.79872	2.71562		2.70921	2.5214		2.22952		2.23189
2.73976	2.22425		2.52378	2.49941		2.79576	2.6687		2.74437	2.66005		2.21586		1.88133
2.94303	2.30847		2.64584	2.40992		2.79124	2.73789		2.7513	2.68922		2.16095		1.85182
2.69711	2.27548		2.55745	2.4561		2.80091	2.57033		2.76695	2.14474		2.11741		1.69161
2.55938	2.51389		2.68261	2.38879		2.77873	2.59561		2.62624	2.56282
2.64906	2.39261		2.54192	2.52629		2.81493	2.50654		2.42805	2.62801
2.41375	2.26496		2.54149	2.64295		2.74161	2.7126		2.61709	2.54521
2.81426	2.2296		2.5776	2.36952		2.59692	2.61612		2.7527	2.639
2.69287	2.54405		2.56594	2.67881		2.593	2.70442		2.72157	2.54924
2.53839	2.39589		2.63324	2.50173		2.83651	2.73602		2.76085	2.40413
2.558	2.23671		2.52417	2.5534		2.84461	2.65609		2.61095	2.62184
2.70853	2.34602		2.6657	2.58978		2.6918	2.57439		2.66745	2.7003
2.25087	2.17397		2.65068	2.47573		2.81894	2.64906		2.62898	2.16715
2.74345	2.34602		2.63208	2.363		2.80805	2.65376		2.78124	2.66153
2.64192	2.41858		2.68857	2.45337		2.7126	2.66757		2.6433	2.61504
2.59822	2.42977		2.63825	2.52678		2.68642	2.57168		2.56433	2.25682
2.77953	2.37448		2.54987	2.48873		2.83532	2.75515		2.74279	2.46813
2.3844	2.31192		2.50988	2.57073		2.74437	2.79872		2.51758	2.79038
2.37448	1.99742		2.64894	2.47504		2.75865	2.73413		2.65807	2.678
2.50358	2.40241		2.21674	2.51491		2.81083	2.71159		2.76066	2.37579
2.68097	2.62238		2.43895	2.36028		2.79945	2.72256		2.62535	2.62388
2.26847	2.49615		2.34453	2.77211		2.84291	2.70648		2.85165	2.65712
2.28247	2.81152		2.46417	2.60673		2.88773	2.79276		2.36992	2.51507
2.28943	2.73223		2.68375	2.63882		2.45962	2.53269		2.58663	2.84377
2.26321	2.6261		2.59509	2.48921		2.41697	2.54545		2.57618	2.50831
2.71057	2.32905		2.70139	2.64088		2.6021	2.7126		2.79974	2.55778
2.6136	2.39425		2.4625	2.54781		2.63224	2.62362		2.77748	2.6314
2.82796	2.72354		2.50069	2.5483		2.72936	2.79798		2.67395	2.52626
2.58509	2.62238		2.73869	2.58259		2.77139	2.67655		2.74266	2.68613
2.65024	2.67096		2.67094	2.41996		2.59692	2.73883		2.47562	2.72287
2.86587	2.05316		2.59411	2.36339		2.6455	2.75952		2.51198	2.53122
2.82607	2.43454		2.36496	2.59297		2.73695	2.64906		2.77653	2.40621
2.76467	2.32905		2.46593	2.28527		2.73223	2.69394		2.65135	2.61773
2.76382	2.62113		2.67168	2.50063		2.76889	2.64312		2.65221	2.57422
2.6653	2.58376		2.51482	2.34275		2.63711	2.67766		2.79442	2.46724
2.9367	2.81828		2.55953	2.36516		2.75515	2.59169		2.81729	2.63097
2.55523	2.44558		2.53889	2.5218		2.76721	2.62362		2.70765	2.64466
2.46426	2.77139		2.47114	2.52499		2.77304	2.64906		2.72627	2.68249
2.52695	2.33585		2.75534	2.37845		2.82543	2.53981		2.55069	2.61589
2.50358	2.3844		2.50434	2.36466		2.65725	2.47042		2.69143	2.3078
2.72936	2.60339		2.61985	2.55549		2.76805	2.60339		2.74606	2.58118
2.57573	2.43454		2.5777	2.50146		2.82026	2.3811		2.78186	2.60513
2.65376	2.46888		2.52483	2.54516		2.85645	2.42179		2.63753	2.48825
2.59561	2.6136		2.60036	2.59326		2.71159	2.55523		2.66251	2.72017
2.51389	2.33925		2.54689	2.41133		2.63711	2.48413		2.79852	2.64658
2.76467	2.51972		2.52651	2.61341		2.60979	2.61486		2.59558	2.66791
2.66301	2.33585		2.50723	2.61329		2.80875	2.62486		2.7661	2.76419
2.80018	2.61106		2.48438	2.49489		2.8129	2.51242		2.71641	2.64476
2.54966	2.1848		2.62309	2.5157		2.76211	2.48413		2.8026	2.5502
2.76211	2.14494		2.43819	2.06109		2.64072	2.63468		2.75076	2.56397
2.68097	2.44244		2.59107	2.42486		2.73602	2.54966		2.82545	2.77441
2.63952	1.96372		2.63764	2.43301		2.55106	2.63346		2.7548	2.61446
2.46734	2.23671		2.57362	2.47229		2.77056	2.54826		2.71865	2.65083
2.5021	2.44715		2.53876	2.49322		2.8196	2.45496		2.80448	2.69828
2.31707	2.13036		2.47825	2.5597		2.68206	2.60468		2.6372	2.43766
2.37282	2.51096		2.60008	2.52339		2.80451	2.63224		2.71704	2.75465
2.16311	1.96935		2.42259	2.35743		2.74345	2.6021		2.84488	2.64886
2.30675	2.08269		2.34831	2.51623		2.76382	2.60081		2.61188	2.67648
2.41536	2.14858		2.61891	2.59608		2.80664	2.71562		2.58864	2.53563
2.42658	2.1139		2.3879	2.44105		2.65609	2.65024		2.70953	2.62143
2.45185	2.23315		2.54285	2.66545		2.6732	2.64431		2.71557	2.65618
2.42977	2.03834		2.56925	2.46378		2.62733	2.65956		2.48653	2.63878
2.29811	1.95243		2.54617	2.41388		2.7126	2.62486		2.66065	2.69783
2.56487	2.16129		2.55358	2.36529		2.75515	2.52839		2.4079	2.53562
2.42339	2.12305		2.54916	2.44964		2.44715	2.50654		2.66126	2.68137
2.98561	2.15222		2.43633	2.46787		2.69817	2.53412		2.69265	2.69833
2.51972	2.16492		2.56765	2.57403		2.58243	2.67876		2.57335	2.64505
2.43928	2.05686		2.36981	2.5304		2.83045	2.62733		2.71756	2.55879
2.50654	2.41213		2.33138	2.57459		2.60979	2.6021		2.63987	2.64071
2.67766	2.10107		2.65915	2.53458		2.62362	2.47195		2.49956	2.58541
2.44872	2.51681		2.50589	2.36779		2.6136	2.6136		2.64018	2.84636
2.52407	2.14494		2.68187	2.50751		2.73789	2.4089		2.74466	2.3459
2.46581	2.11757		2.57928	2.50918		2.66757	2.3102			2.25135
2.22603	2.43295		2.72931	2.66968		2.61106	2.69606			2.41439
2.55938	2.38275		2.61403	2.48639		2.69394	2.69711			2.63876
2.24025	2.55938		2.55924	2.39832		2.56624	2.58509			2.4369
2.4377	2.06425		2.47232	2.17993		2.72158	2.64072			2.51717
2.2189	2.07532		2.49328	2.46711		2.41697	2.60596			2.48472
2.40241	2.35947		2.60073	2.51688		2.74161	2.49316			2.5232
2.28595	2.48413		2.48666	2.57297		2.57708	2.6455
2.46734	2.49016		2.61921	2.52229		2.64788	2.49166
2.35276	2.26145		2.43916	2.54585		2.44715	2.47958
2.19021	2.28072		2.61855	2.48728		2.50358	2.6021
2.42018	2.41536		2.49184	2.56493		2.65141	2.50358
2.61106	2.20817		2.54054	2.58731		2.558	2.41536
2.64072	2.27373		2.52274	2.56154		2.65492	2.40566
2.28421	2.16311		2.48724			2.46888	2.57168
2.42339	2.36616		2.50997			2.70026	2.49615
2.67876	2.23315		2.52558			2.69287	2.57303
2.5021	2.09005		2.57521			2.64072	2.66187
2.24025	2.38933		2.76917			2.54686	2.51389
2.68534	2.06794		2.67491			2.49615	2.45341
2.69922	2.0974		2.80327			2.61738	2.55245
2.63224	2.29811		2.59069			2.66644	2.57573
2.33245			2.52152			2.54545	2.64312
			2.67415			2.57033	2.69073
			2.65304			2.78113	2.61863
			2.51049			2.44244	2.45496
			2.51256			2.77712	2.55106
						2.49316	2.64669
						2.67987	2.63102
						2.39097	2.61989
						2.61612	2.73883
						2.71461	2.68425
						2.47501	2.7516
						2.12488	2.60081
						2.36115	2.66757
						2.30503	2.69394
						2.60979	2.52117
						2.53839	2.3811
						2.59692	2.63589
						2.70339	2.60596
						2.45028	2.50062
						2.68534	2.68206
						2.62113	2.58376
						2.59169	2.71861
						2.68534	2.57708
						2.67876	2.62238
						2.76467	2.61612
						2.86776	2.60468
						2.7196	2.61612
						2.40241	2.71461
						2.71562	2.72059
						2.45962	2.64312
						2.56213	2.71662
						2.6653	2.67432
						2.51681	2.65024
						2.69922	2.79124
						2.60339	2.6653
						2.51681	2.87501
						2.37282	2.60979
						2.74619	2.78741
						2.39915	2.66757
						2.64906	2.64072
						2.6653	2.51972
						2.77139	2.36115
						2.37779	2.40078
						2.59951	2.61612
						2.37613	2.41375
						2.48715	2.67987
						2.5021	2.53126
						2.65492	2.54545
						2.63711	2.53269
						2.66644	2.64431
						2.49913	2.69073
						2.76637	2.53269
						2.70955	2.76038
						2.6732	2.75426
						2.61989	2.67987
						2.61738	2.57303
						2.74437	2.57439
						2.7196	2.81828
						2.62486	2.52695
						2.78895	2.69606
						2.70131	2.54264
						2.8329	2.58509
						2.60596	2.75071
						2.70648	2.54966
						2.65141	2.56624
						2.71562	2.71361
						2.62362	2.7126
						2.7126	2.50506
						2.72354	2.65956
						2.63952	2.68097
						2.63831	2.47806
						2.73223	2.66757
						2.883	2.65841
						2.7835	2.63952
						2.87675	2.70648
						2.60852	2.59951
						2.61106	2.74528
						2.77468	2.71461
						2.74068	2.45652
						2.6687	2.59561
						2.593	2.42992
						2.67432	2.61621
						2.49166	2.64338
						2.80735	2.57615
						2.74253	2.46204
						2.77386	2.62799
						2.67766	2.70794
						2.55523	2.75739
						2.7965	2.48804
						2.64788	2.67931
						2.80236	2.6596
						2.76382	2.65517
						2.76382	2.63928
						2.77304	2.41497
						2.83045	2.71783
						2.63102	2.57909
						2.61233	2.47178
						2.73032	2.64478
						2.84849	2.42336
						2.5811	2.63002
						2.69817	2.51112
						2.53555	2.53365
						2.86199	2.42634
						2.76211	2.49812
						2.5811	2.51496
						2.64431	2.47121
						2.64431	2.55297
						2.52407	2.46137
						2.71562	2.53455
						2.59169	2.67632
						2.33925	2.4858
						2.59431	2.58708
						2.81152	2.33315
						2.72256	2.64471
						2.61738	2.51371
						2.56624	2.61717
						2.7835	2.566
						2.89817	2.49757
						2.57708	2.50862
						2.58641	2.70967
						2.6136	2.4474
						2.55245	2.41457
						2.73976	2.60147
						2.76805	2.55173
						2.69394	2.57614
						2.792	2.56193
						2.87675	2.51104
						2.76972	2.50372
						2.81152	2.54453
						2.80594	2.6103
						2.56076	2.61111
						2.90212	2.55015
						2.7284	2.70939
						2.6732	2.59208
						2.73032	2.50987
						2.72256	2.59537
						2.81828	2.62685
						2.59431	2.58968
						2.80594	2.59127
						2.66757	2.68044
						2.85438	2.54731
						2.61738	2.49272
						2.74801	2.5857
						2.87053	2.50281
						2.66301	2.64247
						2.63952	2.65288
						2.59037	2.3448
						2.67544	2.67267
						2.70026	2.69002
						2.83168	2.56688
						2.88096	2.72443
						2.68642	2.51498
						2.60979	2.63697
						2.54264	2.50295
						2.558	2.60659
						2.62733	2.71509
						2.6875	2.50685
						2.73976	2.66818
						2.56761	2.39589
						2.63224	2.36461
						2.59037	2.44963
						2.6732	2.7472
						2.74345	2.59584
						2.89111	2.6774
						2.79576
						2.66416
						2.73883
						2.70235
						2.76125
						2.87144
						2.75751
						2.5838
						2.69103
						2.75947
						2.67545
						2.74103
						2.56612
						2.67576
						2.55739
						2.56694
						2.62311
						2.58535
						2.62988
						2.63508
						2.64481
						2.64526
						2.54851
						2.62421
						2.64066
						2.64907
						2.48011
						2.68782
						2.74198
						2.7047
						2.48453
						2.59887
						2.59169
						2.76858
						2.58661
						2.62042
						2.78204
						2.58134
						2.47253
						2.45028
						2.63323
						2.66981
						2.78193
						2.45423
						2.51488
						2.68227
						2.74917
						2.64035
						2.42595
						2.52668
						2.76034
						2.55447
						2.54638
						2.74319
						2.5225
						2.55248
						2.72373
						2.62108
						2.55288
						2.54998
						2.84066
						2.7755
						2.56412
						2.76517
						2.6383
						2.5879
						2.65434
						2.66295
						2.8136
						2.75212
						2.6338
						2.75216
						2.85355
						2.67848
						2.64043
						2.50534
						2.55533
						2.56654
						2.65737
						2.67333
						2.59524
						2.51672
						2.69028
						2.45579
						2.49118
						2.55479
						2.79901
						2.71519
						2.60433
						2.53894
						2.69103
						2.56995
						2.58425
						2.66321
						2.80517
						2.68979
						2.69042
						2.44696
						2.6761
						2.62126
						2.42355
						2.6024
						2.78833
						2.58049
						2.59729
						2.61034
						2.69306
						2.68358
						2.61318
						2.65169
						2.34841
						2.70037
						2.6539
						2.76711
						2.62999
						2.57764
						2.60817
						2.59889
						2.6453
						2.52332
						2.67263
						2.51813
						2.66143
						2.66606
						2.67025
						2.6528
						2.53162
						2.62789
						2.64401
						2.38789
						2.46679
						2.54969
						2.72829
						2.56069
						2.69344
						2.63453
						2.62903
						2.72151
						2.50542
						2.57865
						2.52194
						2.64461
						2.65182
						2.46537
						2.61887
						2.67013
						2.72014
						2.60055
						2.4831
						2.5988
						2.61361
						2.65852
						2.66019
						2.68329
						2.62772
						2.61777
						2.7425
						2.55245
						2.63036
						2.69958
						2.5713
						2.72183
						2.5364
						2.38044
						2.53809

## Sheet: Fig 5H
Nuclear/plasma b-catenin intensity (Flat)	Nuclear/plasma b-catenin intensity (Pillar)
1.03137	2.83683
1.71214	3.16415
1.40962	3.13641
1.59257	2.6423
1.95414	7.45872
1.4691	1.69887
1.59673	2.57709
1.55296	2.37463
1.63179	2.79663
1.34194	3.09555
2.24574	4.51111
1.66307	2.9105
1.55013	2.96311
1.8598	2.00126
2.56446	2.26363
2.20137	1.92167
1.98837	2.21082
1.96947	2.17333
1.50086	2.64486
1.6424	1.89335
1.38558	1.93903
1.37902	2.56202
1.82041	2.41183
1.86112	1.77383
2.83849	2.54204
1.58492	2.20587
1.74614	2.86563
2.24108	1.94171
1.5114	1.53044
2.70263	2.14147
2.07532	1.743
1.93962	3.47883
1.63359	2.52052
2.13904	2.04786
1.81692	3.03529
1.21863	1.3166
1.51069	3.25862
2.06499	3.20368
1.94833	2.94534
1.76322	2.96695
1.89364	2.36632
1.56371	3.10363
1.56359	1.72475
3.13296	3.74924
1.59539	3.54456
1.41072	3.32832
1.79239	2.53017
1.91827	2.16614
1.11205	2.71664
1.59383	2.58899
2.04895	3.52478
1.81198	4.35961
1.93286	3.42441
1.95422	2.37492
2.05416	1.90211
2.58157	4.59351
1.89753	2.90256
1.27383	2.99559
1.60777	2.39339
2.92982	2.09724
1.36194	2.32644
1.61406	2.91665
1.65494	2.22299
2.76302	3.29713
1.67448	3.23967
1.8946	3.42975
1.97632	2.42175
2.19305	2.75456
1.28805	2.62027
2.11869	2.38872
1.68547	2.27644
1.96891	2.92875
2.10648	2.18117
1.73012	2.52922
1.85441	1.89499
1.13933	1.95974
2.09136	3.03869
1.94498	3.71912
1.56717	1.53074
1.86111	1.92744
1.7248	1.57685
2.35709	2.0428
1.75764	2.11986
1.70269	2.31994
1.99086	1.93328
1.67384	2.48871
2.11578	2.29934
1.70003	2.21834
1.03119	4.17195
1.72006	2.53067
1.36253	2.44854
2.6768	3.19225
1.98278	2.04464
1.39776	3.26976
3.88898	2.58494
4.24473	2.05799
2.13346	2.41815
1.50102	2.95784
1.3415	3.26761
1.68756	2.48569
1.48985	2.20587
1.45179	2.28831
1.96692	4.45356
1.97547	2.49837
1.99498	3.00068
1.3377	2.52548
1.72413	2.4068
3.0256	2.958
1.09803	3.12414
1.30461	2.62036
1.44193	3.36169
1.80098	3.26372
2.22257	3.66421
1.64774	1.95876
2.25717	3.13652
1.92492	3.33561
1.7063	2.71918
1.60045	2.73339
1.36895	2.83666
1.57087	1.77453
1.6113	2.74079
1.97209	2.21569
2.38405	3.5973
1.6	2.12191
1.86156	1.28593
1.51182	1.60286
1.35608	3.35328
1.83821	2.59223
2.42782	1.93956
1.19998	2.79268
1.91377	1.61183
1.00918	6.23846
1.39575	3.7129
1.15798	2.01619
1.95535	1.41583
1.523	1.44446
1.02953	2.81071
1.03823	2.74472
1.25463	3.16722
1.86249	3.19943
1.34589	3.62439
1.39026	1.52453
1.606	2.36476
1.06843	2.48802
2.87579	2.94002
1.51476	1.3833
3.59594	2.67649
1.36487	2.20871
1.13062	1.99143
1.49119	1.95015
2.5382	2.47457
2.0853	2.19445
1.71125	1.53989
1.56194	1.93128
2.01918	2.57233
1.05371	3.68145
1.1989	3.19004
1.74807	2.35094
1.89936	1.15702
1.03856	2.18939
2.19209	2.19894
1.48125	3.6912
1.66244	1.98374
2.13047	2.94653
2.86509	2.33098
1.49897	2.40329
1.50721	4.68137
1.59685	2.69273
1.86962	1.82174
1.38739	1.77645
1.26269	1.8274
2.08765	1.71028
2.15487	1.18197
1.19867	11.0841
1.42837	2.01435
2.03647	3.32236
1.14923	2.03995
1.33417	1.81089
3.46916	1.51157
1.22228	0.99541
1.38087	1.57119
1.5604	1.36882
2.02902	1.83838
1.44231	2.14654
1.82911	1.71409
2.47818	1.18079
2.11269	2.31773
	2.28952
	1.70862
	2.17753
	3.18483
	2.30409
	1.24505
	2.73461
	1.6649
	2.70151
	2.2859
	1.53987
	4.2003

[truncated: 3 more sheets: Fig 5I, Fig 5J, Fig 5K]
