# Supplementary material for: Chromatin Reprogramming via Contact Guidance-Induced Nuclear Deformation Promotes Stem Cell Differentiation
Source: Research Square preprint supplement (doi:10.21203/rs.3.rs-155599/v1), 2021-02-04
Supplement: Supplementary file 6 [file ec112963752296d40d351e49.xlsx]

## Sheet: Annotation
Gene	original_id	Flat	Induced	Gene ID	Type	Tax ID	Homologene Gene ID	Homologene Gene Tax ID	Gene Symbol	Description	Biological Process (GO)	Kinase Class (UniProt)	Protein Function (Protein Atlas)	Subcellular Location (Protein Atlas)	Drug (DrugBank)	Canonical Pathways_x000D_	Hallmark Gene Sets_x000D_	R-HSA-1640170 Cell Cycle	GO:0051301 cell division	GO:0044770 cell cycle phase transition	GO:0006260 DNA replication	GO:0071103 DNA conformation change	GO:0097435 supramolecular fiber organizat	M129 PID PLK1 PATHWAY	GO:0051983 regulation of chromosome segre	M14 PID AURORA B PATHWAY	GO:0051052 regulation of DNA metabolic pr	GO:0090068 positive regulation of cell cy	GO:0000086 G2/M transition of mitotic cel	GO:0030335 positive regulation of cell mi	GO:0006323 DNA packaging	GO:0051129 negative regulation of cellula	GO:1903046 meiotic cell cycle process	GO:0000910 cytokinesis	R-HSA-109582 Hemostasis	GO:0030155 regulation of cell adhesion	GO:0000904 cell morphogenesis involved in	TotalEvidenceCount
90865	IL33	1	1	90865	Gene_ID	H. sapiens	90865	H. sapiens	IL33	interleukin 33	GO:0051025 negative regulation of immunoglobulin secretion;GO:0002282 microglial cell activation involved in immune response;GO:0090197 positive regulation of chemokine secretion						(M5953)HALLMARK KRAS SIGNALING UP	0	0	0	0	0	0	0	0	0	0	0	0	0	0	0	0	0	0	0	0	2
9319	TRIP13	1	1	9319	Gene_ID	H. sapiens	9319	H. sapiens	TRIP13	thyroid hormone receptor interactor 13	GO:0007094 mitotic spindle assembly checkpoint;GO:0071174 mitotic spindle checkpoint;GO:0051598 meiotic recombination checkpoint			Nucleus(Approved)			(M5925)HALLMARK E2F TARGETS	0	1	1	0	1	0	0	1	0	0	0	0	0	0	1	1	0	0	0	0	2
494336	MIR424	1	1	494336	Gene_ID	H. sapiens	494336	H. sapiens	MIR424	microRNA 424	GO:1904858 negative regulation of endothelial cell chemotaxis to vascular endothelial growth factor;GO:0106128 negative regulation of store-operated calcium entry;GO:2000545 negative regulation of endothelial cell chemotaxis to fibroblast growth factor							0	0	1	0	0	0	0	0	0	0	0	0	1	0	0	0	0	0	0	1	2
805	CALM2	1	1	805	Gene_ID	H. sapiens	805	H. sapiens	CALM2	calmodulin 2	GO:0010881 regulation of cardiac muscle contraction by regulation of the release of sequestered calcium ion;GO:0060316 positive regulation of ryanodine-sensitive calcium-release channel activity;GO:0060315 negative regulation of ryanodine-sensitive calcium-release channel activity		RAS pathway related proteins;Transporters/Accessory Factors Involved in Transport					1	1	1	0	0	0	0	0	0	0	0	1	0	0	0	0	1	1	0	0	2
220	ALDH1A3	1	1	220	Gene_ID	H. sapiens	220	H. sapiens	ALDH1A3	aldehyde dehydrogenase 1 family member A3	GO:0021768 nucleus accumbens development;GO:0002072 optic cup morphogenesis involved in camera-type eye development;GO:0002138 retinoic acid biosynthetic process		Enzymes/ENZYME proteins/Oxidoreductases	Cytosol;Nucleus(Enhanced)	NADH (Thyroid hormone binding);Vitamin A (Thyroid hormone binding)		(M5908)HALLMARK ANDROGEN RESPONSE; (M5953)HALLMARK KRAS SIGNALING UP	0	0	0	0	0	0	0	0	0	0	0	0	0	0	0	0	0	0	0	0	2
7168	TPM1	1	1	7168	Gene_ID	H. sapiens	7168	H. sapiens	TPM1	tropomyosin 1	GO:0003065 positive regulation of heart rate by epinephrine;GO:0001996 positive regulation of heart rate by epinephrine-norepinephrine;GO:0003321 positive regulation of blood pressure by epinephrine-norepinephrine			Actin filaments;Cytosol(Approved)			(M5930)HALLMARK EPITHELIAL MESENCHYMAL TRANSITION	0	0	0	0	0	1	0	0	0	0	0	0	0	0	0	0	0	0	1	1	2
9232	PTTG1	1	1	9232	Gene_ID	H. sapiens	9232	H. sapiens	PTTG1	PTTG1 regulator of sister chromatid separation, securin	GO:2000816 negative regulation of mitotic sister chromatid separation;GO:0031145 anaphase-promoting complex-dependent catabolic process;GO:0033048 negative regulation of mitotic sister chromatid segregation			Cytosol(Supported)Nucleoli(Approved)			(M5925)HALLMARK E2F TARGETS; (M5901)HALLMARK G2M CHECKPOINT	1	1	1	0	1	0	0	1	0	0	0	0	0	0	1	1	0	0	0	0	2
10535	RNASEH2A	1	1	10535	Gene_ID	H. sapiens	10535	H. sapiens	RNASEH2A	ribonuclease H2 subunit A	GO:0043137 DNA replication, removal of RNA primer;GO:0033567 DNA replication, Okazaki fragment processing;GO:0006273 lagging strand elongation		Enzymes/ENZYME proteins/Hydrolases	Cytosol;Nucleus(Enhanced)			(M5925)HALLMARK E2F TARGETS; (M5907)HALLMARK ESTROGEN RESPONSE LATE	0	0	0	1	1	0	0	0	0	0	0	0	0	0	0	0	0	0	0	0	2
2825	GPR1	1	1	2825	Gene_ID	H. sapiens	2825	H. sapiens	GPR1	G protein-coupled receptor 1	GO:0007218 neuropeptide signaling pathway;GO:0007186 G protein-coupled receptor signaling pathway;GO:0007165 signal transduction		G-protein coupled receptors/GPCRs excl olfactory receptors	Plasma membrane(Supported)Nucleoplasm;Vesicles(Approved)				0	0	0	0	0	0	0	0	0	0	0	0	0	0	0	0	0	0	0	0	2
6426	SRSF1	1	1	6426	Gene_ID	H. sapiens	6426	H. sapiens	SRSF1	serine and arginine rich splicing factor 1	GO:0000395 mRNA 5'-splice site recognition;GO:0006406 mRNA export from nucleus;GO:0006376 mRNA splice site selection			Nucleoplasm(Enhanced)			(M5925)HALLMARK E2F TARGETS; (M5901)HALLMARK G2M CHECKPOINT; (M5926)HALLMARK MYC TARGETS V1	0	0	0	0	0	0	0	0	0	0	0	0	0	0	0	0	0	0	0	0	2
375033	PEAR1	1	1	375033	Gene_ID	H. sapiens	375033	H. sapiens	PEAR1	platelet endothelial aggregation receptor 1	GO:0043654 recognition of apoptotic cell;GO:0070527 platelet aggregation;GO:0045746 negative regulation of Notch signaling pathway			Cell Junctions(Supported)Centrosome;Nucleoplasm(Approved)				0	0	0	0	0	0	0	0	0	0	0	0	0	0	0	0	0	0	0	0	2
151887	CCDC80	1	1	151887	Gene_ID	H. sapiens	151887	H. sapiens	CCDC80	coiled-coil domain containing 80	GO:0010811 positive regulation of cell-substrate adhesion;GO:0010810 regulation of cell-substrate adhesion;GO:0045785 positive regulation of cell adhesion							0	0	0	0	0	0	0	0	0	0	0	0	0	0	0	0	0	0	1	0	2
8916	HERC3	1	1	8916	Gene_ID	H. sapiens	8916	H. sapiens	HERC3	HECT and RLD domain containing E3 ubiquitin protein ligase 3	GO:0016567 protein ubiquitination;GO:0032446 protein modification by small protein conjugation;GO:0070647 protein modification by small protein conjugation or removal		Enzymes/ENZYME proteins/Transferases	Cytosol(Approved)			(M5908)HALLMARK ANDROGEN RESPONSE	0	0	0	0	0	0	0	0	0	0	0	0	0	0	0	0	0	0	0	0	2
890	CCNA2	1	1	890	Gene_ID	H. sapiens	890	H. sapiens	CCNA2	cyclin A2	GO:0071373 cellular response to luteinizing hormone stimulus;GO:0071314 cellular response to cocaine;GO:0034699 response to luteinizing hormone			Cytosol;Nucleoplasm(Enhanced)	4-(2,4-Dimethyl-Thiazol-5-Yl)-Pyrimidin-2-Ylamine;6-O-Cyclohexylmethyl Guanine;[4-(2-Amino-4-Methyl-Thiazol-5-Yl)-Pyrimidin-2-Yl]-(3-Nitro-Phenyl)-Amine;4-(2,4-Dimethyl-Thiazol-5-Yl)-Pyrimidin-2-Yl]-(4-Trifluoromethyl-Phenyl)-Amine;4-[(7-OXO-7H-THIAZOLO[5,4-E]INDOL-8-YLMETHYL)-AMINO]-N-PYRIDIN-2-YL-BENZENESULFONAMIDE;N-(3-cyclopropyl-1H-pyrazol-5-yl)-2-(2-naphthyl)acetamide;2-ANILINO-6-CYCLOHEXYL…	(M3686)SA REG CASCADE OF CYCLIN EXPR; (M11)PID PRL SIGNALING EVENTS PATHWAY; (M234)PID IL2 STAT5 PATHWAY	(M5901)HALLMARK G2M CHECKPOINT; (M5926)HALLMARK MYC TARGETS V1	1	1	1	1	1	0	0	1	0	1	0	1	0	0	0	0	0	0	0	0	2
1894	ECT2	1	1	1894	Gene_ID	H. sapiens	1894	H. sapiens	ECT2	epithelial cell transforming 2	GO:2000431 regulation of cytokinesis, actomyosin contractile ring assembly;GO:0042307 positive regulation of protein import into nucleus;GO:0000915 actomyosin contractile ring assembly			Cytosol;Nucleus(Enhanced)		(M68)PID RHOA REG PATHWAY; (M129)PID PLK1 PATHWAY	(M5893)HALLMARK MITOTIC SPINDLE	1	1	1	0	0	1	1	1	0	0	1	0	0	0	0	0	1	0	0	1	2
3014	H2AFX	1	1	3014	Gene_ID	H. sapiens	3014	H. sapiens	H2AX	H2A.X variant histone	GO:0071480 cellular response to gamma radiation;GO:0021987 cerebral cortex development;GO:0045739 positive regulation of DNA repair			Nuclear speckles;Nucleoplasm(Supported)		(M84)PID ATM PATHWAY; (M1)PID FANCONI PATHWAY	(M5922)HALLMARK UNFOLDED PROTEIN RESPONSE; (M5941)HALLMARK UV RESPONSE UP; (M5925)HALLMARK E2F TARGETS	1	0	1	1	1	0	0	0	1	1	0	0	0	1	0	1	0	0	0	0	2
7272	TTK	1	1	7272	Gene_ID	H. sapiens	7272	H. sapiens	TTK	TTK protein kinase	GO:0033316 meiotic spindle assembly checkpoint;GO:0044779 meiotic spindle checkpoint;GO:1902103 negative regulation of metaphase/anaphase transition of meiotic cell cycle	Other	Enzymes/{ENZYME proteins/Transferases,Kinases}	Cytosol;Nucleoli(Approved)	2,6-Dihydroanthra/1,9-Cd/Pyrazol-6-One (Protein tyrosine kinase activity)		(M5951)HALLMARK SPERMATOGENESIS; (M5893)HALLMARK MITOTIC SPINDLE; (M5901)HALLMARK G2M CHECKPOINT	0	1	1	0	0	0	0	1	0	0	0	0	0	0	1	1	0	0	0	0	2
5347	PLK1	1	1	5347	Gene_ID	H. sapiens	5347	H. sapiens	PLK1	polo like kinase 1	GO:0007094 mitotic spindle assembly checkpoint;GO:0071174 mitotic spindle checkpoint;GO:0072425 signal transduction involved in G2 DNA damage checkpoint	Other	Enzymes/{ENZYME proteins/Transferases,Kinases}		3-[3-chloro-5-(5-{[(1S)-1-phenylethyl]amino}isoxazolo[5,4-c]pyridin-3-yl)phenyl]propan-1-ol (Protein serine/threonine kinase activity);3-[3-(3-methyl-6-{[(1S)-1-phenylethyl]amino}-1H-pyrazolo[4,3-c]pyridin-1-yl)phenyl]propanamide (Protein serine/threonine kinase activity);4-(4-METHYLPIPERAZIN-1-YL)-N-[5-(2-THIENYLACETYL)-1,5-DIHYDROPYRROLO[3,4-C]PYRAZOL-3-YL]BENZAMIDE (Protein serine/threonine ki…	(M46)PID ATR PATHWAY; (M176)PID FOXM1 PATHWAY; (M129)PID PLK1 PATHWAY	(M5928)HALLMARK MYC TARGETS V2; (M5893)HALLMARK MITOTIC SPINDLE; (M5901)HALLMARK G2M CHECKPOINT	1	1	1	0	0	1	1	1	1	0	0	1	0	0	1	1	1	0	0	0	2
22836	RHOBTB3	1	1	22836	Gene_ID	H. sapiens	22836	H. sapiens	RHOBTB3	Rho related BTB domain containing 3	GO:0008045 motor neuron axon guidance;GO:0043652 engulfment of apoptotic cell;GO:0008584 male gonad development			Vesicles(Uncertain)			(M5906)HALLMARK ESTROGEN RESPONSE EARLY	0	0	0	0	0	1	0	0	0	0	0	0	0	0	0	0	0	0	0	1	2
11252	PACSIN2	1	1	11252	Gene_ID	H. sapiens	11252	H. sapiens	PACSIN2	protein kinase C and casein kinase substrate in neurons 2	GO:0070836 caveola assembly;GO:0044854 plasma membrane raft assembly;GO:0001765 membrane raft assembly			Plasma membrane;Vesicles(Supported)Cytosol;Nuclear speckles(Approved)				0	0	0	0	0	1	0	0	0	0	0	0	0	0	1	0	0	0	0	1	2
7052	TGM2	1	1	7052	Gene_ID	H. sapiens	7052	H. sapiens	TGM2	transglutaminase 2	GO:0018153 isopeptide cross-linking via N6-(L-isoglutamyl)-L-lysine;GO:0032471 negative regulation of endoplasmic reticulum calcium ion concentration;GO:0051561 positive regulation of mitochondrial calcium ion concentration		Enzymes/ENZYME proteins/Transferases	Cytosol;Plasma membrane(Approved)	Guanosine-5'-Diphosphate (Protein-glutamine gamma-glutamyltransferase activity)	(M118)PID INTEGRIN A9B1 PATHWAY; (M99)PID TXA2PATHWAY; (M18)PID INTEGRIN1 PATHWAY	(M5947)HALLMARK IL2 STAT5 SIGNALING; (M5906)HALLMARK ESTROGEN RESPONSE EARLY; (M5891)HALLMARK HYPOXIA	0	0	0	0	0	0	0	0	0	0	0	0	0	0	0	0	0	0	1	0	2
11167	MIR198;FSTL1	1	1	11167	Gene_ID	H. sapiens	11167	H. sapiens	FSTL1	follistatin like 1	GO:0030510 regulation of BMP signaling pathway;GO:0030509 BMP signaling pathway;GO:0071773 cellular response to BMP stimulus			Cytosol;Vesicles(Approved)		(M17761)ST WNT BETA CATENIN PATHWAY; (M5883)NABA SECRETED FACTORS; (M5885)NABA MATRISOME ASSOCIATED	(M5944)HALLMARK ANGIOGENESIS; (M5930)HALLMARK EPITHELIAL MESENCHYMAL TRANSITION	0	0	0	0	0	0	0	0	0	0	0	0	0	0	0	0	0	0	0	0	2
55705	IPO9	1	1	55705	Gene_ID	H. sapiens	55705	H. sapiens	IPO9	importin 9	GO:0006606 protein import into nucleus;GO:0051170 import into nucleus;GO:0017038 protein import		Transporters/Transporter channels and pores	Cytosol;Vesicles(Approved)				0	0	0	0	0	0	0	0	0	0	0	0	0	0	0	0	0	0	0	0	2
10381	TUBB3	1	1	10381	Gene_ID	H. sapiens	10381	H. sapiens	TUBB3	tubulin beta 3 class III	GO:1990791 dorsal root ganglion development;GO:0038007 netrin-activated signaling pathway;GO:0061548 ganglion development				Epothilone D (Structural constituent of cytoskeleton);Epothilone B (Structural constituent of cytoskeleton);Ixabepilone (Structural constituent of cytoskeleton);CYT997 (Structural constituent of cytoskeleton);ZEN-012 (Structural constituent of cytoskeleton)			1	1	0	0	0	0	0	0	0	0	0	1	0	0	0	0	0	1	0	1	2
55106	SLFN12	1	1	55106	Gene_ID	H. sapiens	55106	H. sapiens	SLFN12	schlafen family member 12								0	0	0	0	0	0	0	0	0	0	0	0	0	0	0	0	0	0	0	0	2
1500	CTNND1	1	1	1500	Gene_ID	H. sapiens	1500	H. sapiens	CTNND1	catenin delta 1	GO:0035635 entry of bacterium into host cell;GO:0030260 entry into host cell;GO:0051806 entry into cell of other organism involved in symbiotic interaction			Plasma membrane(Enhanced)		(M184)PID ECADHERIN KERATINOCYTE PATHWAY; (M266)PID NCADHERIN PATHWAY; (M156)PID ECADHERIN NASCENT AJ PATHWAY	(M5915)HALLMARK APICAL JUNCTION	0	0	0	0	0	0	0	0	0	0	0	0	0	0	0	0	0	0	0	0	2
51232	CRIM1	1	1	51232	Gene_ID	H. sapiens	51232	H. sapiens	CRIM1	cysteine rich transmembrane BMP regulator 1	GO:0048009 insulin-like growth factor receptor signaling pathway;GO:0010951 negative regulation of endopeptidase activity;GO:0010466 negative regulation of peptidase activity					(M3008)NABA ECM GLYCOPROTEINS; (M5884)NABA CORE MATRISOME; (M5889)NABA MATRISOME		0	0	0	0	0	0	0	0	0	0	0	0	0	0	0	0	0	0	0	0	2
116832	RPL39L	1	1	116832	Gene_ID	H. sapiens	116832	H. sapiens	RPL39L	ribosomal protein L39 like	GO:0007283 spermatogenesis;GO:0048232 male gamete generation;GO:0007276 gamete generation		Ribosomal proteins				(M5951)HALLMARK SPERMATOGENESIS	0	0	0	0	0	0	0	0	0	0	0	0	0	0	0	0	0	0	0	0	2
4343	MOV10	1	1	4343	Gene_ID	H. sapiens	4343	H. sapiens	MOV10	Mov10 RISC complex RNA helicase	GO:0061158 3'-UTR-mediated mRNA destabilization;GO:0150011 regulation of neuron projection arborization;GO:0010526 negative regulation of transposition, RNA-mediated		Enzymes/ENZYME proteins/Hydrolases	Cytosol(Approved)			(M5911)HALLMARK INTERFERON ALPHA RESPONSE	0	0	0	0	0	0	0	0	0	0	0	0	0	0	0	0	0	0	0	1	2
55355	HJURP	1	1	55355	Gene_ID	H. sapiens	55355	H. sapiens	HJURP	Holliday junction recognition protein	GO:0034080 CENP-A containing nucleosome assembly;GO:0006336 DNA replication-independent nucleosome assembly;GO:0031055 chromatin remodeling at centromere			Nucleoli;Nucleus(Enhanced)Cytosol(Approved)				1	1	0	0	1	1	0	0	0	0	0	0	0	1	0	0	0	0	0	0	2
9540	TP53I3	1	1	9540	Gene_ID	H. sapiens	9540	H. sapiens	TP53I3	tumor protein p53 inducible protein 3	GO:0006739 NADP metabolic process;GO:0046496 nicotinamide nucleotide metabolic process;GO:0019362 pyridine nucleotide metabolic process			Vesicles(Supported)		(M256)PID TAP63 PATHWAY; (M19)PID P73PATHWAY; (M145)PID P53 DOWNSTREAM PATHWAY		0	0	0	0	0	0	0	0	0	0	0	0	0	0	0	0	0	0	0	0	2
65062	TMEM237	1	1	65062	Gene_ID	H. sapiens	65062	H. sapiens	TMEM237	transmembrane protein 237	GO:0030111 regulation of Wnt signaling pathway;GO:0060271 cilium assembly;GO:0044782 cilium organization							0	0	0	0	0	0	0	0	0	0	0	1	0	0	0	0	0	0	0	0	2
857	CAV1	1	1	857	Gene_ID	H. sapiens	857	H. sapiens	CAV1	caveolin 1	GO:1903609 negative regulation of inward rectifier potassium channel activity;GO:0034141 positive regulation of toll-like receptor 3 signaling pathway;GO:0019065 receptor-mediated endocytosis of virus by host cell		Transporters/Accessory Factors Involved in Transport	Golgi apparatus(Supported)		(M90)PID WNT CANONICAL PATHWAY; (M206)PID PDGFRA PATHWAY; (M226)PID VEGFR1 PATHWAY	(M5942)HALLMARK UV RESPONSE DN; (M5902)HALLMARK APOPTOSIS; (M5891)HALLMARK HYPOXIA	0	0	0	0	0	1	0	0	0	1	0	0	1	0	1	0	0	1	1	1	2
64105	CENPK	1	1	64105	Gene_ID	H. sapiens	64105	H. sapiens	CENPK	centromere protein K	GO:0034080 CENP-A containing nucleosome assembly;GO:0006336 DNA replication-independent nucleosome assembly;GO:0051382 kinetochore assembly							1	1	0	0	1	0	0	0	0	0	0	0	0	1	0	0	0	0	0	0	2
1841	DTYMK	1	1	1841	Gene_ID	H. sapiens	1841	H. sapiens	DTYMK	deoxythymidylate kinase	GO:0046105 thymidine biosynthetic process;GO:0046126 pyrimidine deoxyribonucleoside biosynthetic process;GO:0006233 dTDP biosynthetic process		Enzymes/ENZYME proteins/Transferases	Mitochondria(Approved)	Thymidine-5'-Phosphate (Uridylate kinase activity);2',3'-Dideoxythymidine-5'-Monophosphate (Uridylate kinase activity);Phosphoric Acid Mono-[3-Fluoro-5-(5-Methyl-2,4-Dioxo-3,4-Dihydro-2h-Pyrimidin-1-Yl)-Tetrahyro-Furan-2-Ylmethyl] Ester (Uridylate kinase activity);Phosphoric Acid Mono-[3-Amino-5-(5-Methyl-2,4-Dioxo-3,4-Dihydro-2h-Pyrimidin-1-Yl)-Tetrahydro-Furan-2-Ylmethyl] Ester (Uridylate kinas…	(M9526)ST T CELL SIGNAL TRANSDUCTION	(M5901)HALLMARK G2M CHECKPOINT	0	0	0	0	0	0	0	0	0	0	0	0	0	0	0	0	0	0	0	0	2
81930	KIF18A	1	1	81930	Gene_ID	H. sapiens	81930	H. sapiens	KIF18A	kinesin family member 18A	GO:0072520 seminiferous tubule development;GO:0019886 antigen processing and presentation of exogenous peptide antigen via MHC class II;GO:0007080 mitotic metaphase plate congression			Cytokinetic bridge;Microtubules(Supported)				1	1	0	0	0	1	0	0	0	0	0	0	0	0	0	1	0	1	0	0	2
4659	PPP1R12A	1	1	4659	Gene_ID	H. sapiens	4659	H. sapiens	PPP1R12A	protein phosphatase 1 regulatory subunit 12A	GO:0035508 positive regulation of myosin-light-chain-phosphatase activity;GO:1903140 regulation of establishment of endothelial barrier;GO:0035507 regulation of myosin-light-chain-phosphatase activity			Actin filaments;Cytosol(Enhanced)		(M71)PID ILK PATHWAY; (M12)PID RHOA PATHWAY; (M129)PID PLK1 PATHWAY		1	1	1	0	0	0	1	0	0	0	0	1	0	0	0	0	0	0	1	0	2
55884	WSB2	1	1	55884	Gene_ID	H. sapiens	55884	H. sapiens	WSB2	WD repeat and SOCS box containing 2	GO:0043687 post-translational protein modification;GO:0016567 protein ubiquitination;GO:0032446 protein modification by small protein conjugation							0	0	0	0	0	0	0	0	0	0	0	0	0	0	0	0	0	0	0	0	2
64101	LRRC4	1	1	64101	Gene_ID	H. sapiens	64101	H. sapiens	LRRC4	leucine rich repeat containing 4	GO:0097119 postsynaptic density protein 95 clustering;GO:0097106 postsynaptic density organization;GO:0099560 synaptic membrane adhesion			Golgi apparatus(Approved)				0	0	0	0	0	0	0	0	0	0	0	0	0	0	0	0	0	0	0	1	2
7048	TGFBR2	1	1	7048	Gene_ID	H. sapiens	7048	H. sapiens	TGFBR2	transforming growth factor beta receptor 2	GO:0003430 growth plate cartilage chondrocyte growth;GO:0051138 positive regulation of NK T cell differentiation;GO:0003431 growth plate cartilage chondrocyte development	TKL Ser/Thr protein kinase family	Enzymes/{ENZYME proteins/Transferases,Kinases/TKL Ser/Thr protein kinases}	Plasma membrane(Supported)	Glycerol (Type iii transforming growth factor beta receptor binding)	(M185)PID ALK1 PATHWAY; (M33)PID GLYPICAN 1PATHWAY; (M53)PID INTEGRIN3 PATHWAY	(M5942)HALLMARK UV RESPONSE DN	0	0	0	0	0	0	0	0	0	0	0	0	1	0	0	0	0	0	1	0	2
1063	CENPF	1	1	1063	Gene_ID	H. sapiens	1063	H. sapiens	CENPF	centromere protein F	GO:0007094 mitotic spindle assembly checkpoint;GO:0071174 mitotic spindle checkpoint;GO:0045841 negative regulation of mitotic metaphase/anaphase transition			Nucleoplasm(Supported)		(M176)PID FOXM1 PATHWAY	(M5893)HALLMARK MITOTIC SPINDLE; (M5901)HALLMARK G2M CHECKPOINT	1	1	1	0	0	0	0	1	0	0	0	1	0	1	1	0	0	0	0	0	2
401494	HACD4	1	1	401494	Gene_ID	H. sapiens	401494	H. sapiens	HACD4	3-hydroxyacyl-CoA dehydratase 4	GO:0042761 very long-chain fatty acid biosynthetic process;GO:0030497 fatty acid elongation;GO:0000038 very long-chain fatty acid metabolic process		Enzymes/ENZYME proteins/Lyases					0	0	0	0	0	0	0	0	0	0	0	0	0	0	0	0	0	0	0	0	2
81624	DIAPH3	1	1	81624	Gene_ID	H. sapiens	81624	H. sapiens	DIAPH3	diaphanous related formin 3	GO:0030041 actin filament polymerization;GO:0008154 actin polymerization or depolymerization;GO:0051258 protein polymerization			Microtubules;Plasma membrane(Supported)		(M81)PID CDC42 PATHWAY; (M164)PID ERBB1 DOWNSTREAM PATHWAY	(M5925)HALLMARK E2F TARGETS	1	0	0	0	0	1	0	0	0	0	0	0	0	0	0	0	0	0	0	0	2
220042	DDIAS	1	1	220042	Gene_ID	H. sapiens	220042	H. sapiens	DDIAS	DNA damage induced apoptosis suppressor	GO:1902230 negative regulation of intrinsic apoptotic signaling pathway in response to DNA damage;GO:0097752 regulation of DNA stability;GO:1902229 regulation of intrinsic apoptotic signaling pathway in response to DNA damage			Cytosol;Plasma membrane(Approved)				0	0	1	0	0	0	0	0	0	1	0	0	0	0	0	0	0	0	0	0	2
3015	H2AFZ	1	1	3015	Gene_ID	H. sapiens	3015	H. sapiens	H2AZ1	H2A.Z variant histone 1	GO:0071392 cellular response to estradiol stimulus;GO:0006342 chromatin silencing;GO:0032355 response to estradiol			Nucleoplasm(Supported)		(M195)PID CMYB PATHWAY	(M5935)HALLMARK FATTY ACID METABOLISM; (M5925)HALLMARK E2F TARGETS; (M5901)HALLMARK G2M CHECKPOINT	1	0	0	0	1	0	0	0	1	0	0	0	0	1	0	0	0	0	0	0	2
1033	CDKN3	1	1	1033	Gene_ID	H. sapiens	1033	H. sapiens	CDKN3	cyclin dependent kinase inhibitor 3	GO:0000079 regulation of cyclin-dependent protein serine/threonine kinase activity;GO:1904029 regulation of cyclin-dependent protein kinase activity;GO:0035335 peptidyl-tyrosine dephosphorylation		Enzymes/ENZYME proteins/Hydrolases	Cytosol(Enhanced)			(M5951)HALLMARK SPERMATOGENESIS; (M5925)HALLMARK E2F TARGETS; (M5901)HALLMARK G2M CHECKPOINT	0	0	1	0	0	0	0	0	0	0	0	1	0	0	0	0	0	0	0	0	2
100616113	MIR4680	1	1	100616113	Gene_ID	H. sapiens	100616113	H. sapiens	MIR4680	microRNA 4680								0	0	0	0	0	0	0	0	0	0	0	0	0	0	0	0	0	0	0	0	2
3598	IL13RA2	1	1	3598	Gene_ID	H. sapiens	3598	H. sapiens	IL13RA2	interleukin 13 receptor subunit alpha 2	GO:0043305 negative regulation of mast cell degranulation;GO:0033007 negative regulation of mast cell activation involved in immune response;GO:0043301 negative regulation of leukocyte degranulation		CD markers		AER001 (Signal transducer activity)	(M17580)ST IL 13 PATHWAY; (M28)PID IL4 2PATHWAY	(M5951)HALLMARK SPERMATOGENESIS	0	0	0	0	0	0	0	0	0	0	0	0	0	0	0	0	0	0	0	0	2
388115	C15orf52	1	1	388115	Gene_ID	H. sapiens	388115	H. sapiens	CCDC9B	coiled-coil domain containing 9B				Cytosol;Nucleoplasm(Approved)				0	0	0	0	0	0	0	0	0	0	0	0	0	0	0	0	0	0	0	0	2
376267	RAB15	1	1	376267	Gene_ID	H. sapiens	376267	H. sapiens	RAB15	RAB15, member RAS oncogene family	GO:1903307 positive regulation of regulated secretory pathway;GO:0006904 vesicle docking involved in exocytosis;GO:0045921 positive regulation of exocytosis			Microtubule organizing center;Vesicles(Approved)				0	0	0	0	0	0	0	0	0	0	0	1	0	0	0	0	0	0	0	0	2
151246	SGO2	1	1	151246	Gene_ID	H. sapiens	151246	H. sapiens	SGO2	shugoshin 2	GO:0051754 meiotic sister chromatid cohesion, centromeric;GO:0051177 meiotic sister chromatid cohesion;GO:0045144 meiotic sister chromatid segregation			Nucleoplasm(Enhanced)Nuclear bodies(Approved)				1	1	0	0	0	0	0	0	0	0	0	0	0	0	0	1	0	0	0	0	2
8914	TIMELESS	1	1	8914	Gene_ID	H. sapiens	8914	H. sapiens	TIMELESS	timeless circadian regulator	GO:1904976 cellular response to bleomycin;GO:1905168 positive regulation of double-strand break repair via homologous recombination;GO:0043111 replication fork arrest			Nucleus(Supported)		(M95)PID CIRCADIAN PATHWAY; (M46)PID ATR PATHWAY	(M5925)HALLMARK E2F TARGETS	0	1	1	1	1	0	0	0	0	1	0	0	0	0	0	0	0	0	0	0	2
6790	AURKA	1	1	6790	Gene_ID	H. sapiens	6790	H. sapiens	AURKA	aurora kinase A	GO:1900195 positive regulation of oocyte maturation;GO:0006977 DNA damage response, signal transduction by p53 class mediator resulting in cell cycle arrest;GO:0007057 spindle assembly involved in female meiosis I	Other	Enzymes/{ENZYME proteins/Transferases,Kinases}	Centrosome;Cytosol;Nucleus(Approved)	Phosphonothreonine (Protein serine/threonine/tyrosine kinase activity);AT9283 (Protein serine/threonine/tyrosine kinase activity);CYC116 (Protein serine/threonine/tyrosine kinase activity);MLN8237 (Protein serine/threonine/tyrosine kinase activity);4-(4-METHYLPIPERAZIN-1-YL)-N-[5-(2-THIENYLACETYL)-1,5-DIHYDROPYRROLO[3,4-C]PYRAZOL-3-YL]BENZAMIDE (Protein serine/threonine/tyrosine kinase activity);…	(M242)PID AURORA A PATHWAY; (M14)PID AURORA B PATHWAY; (M71)PID ILK PATHWAY	(M5951)HALLMARK SPERMATOGENESIS; (M5893)HALLMARK MITOTIC SPINDLE; (M5901)HALLMARK G2M CHECKPOINT	1	1	1	0	0	1	1	1	1	0	1	1	0	0	0	1	1	0	0	1	2
3084	NRG1	1	1	3084	Gene_ID	H. sapiens	3084	H. sapiens	NRG1	neuregulin 1	GO:0021842 chemorepulsion involved in interneuron migration from the subpallium to the cortex;GO:0021840 directional guidance of interneurons involved in migration from the subpallium to the cortex;GO:0021830 interneuron migration from the subpallium to the cortex			Nucleoplasm(Approved)		(M201)PID ERBB NETWORK PATHWAY; (M33)PID GLYPICAN 1PATHWAY; (M13)PID ERBB4 PATHWAY		0	0	0	0	0	1	0	0	0	0	0	0	0	0	0	0	0	0	0	1	2
102465453	MIR6756	1	1	102465453	Gene_ID	H. sapiens	102465453	H. sapiens	MIR6756	microRNA 6756								0	0	0	0	0	0	0	0	0	0	0	0	0	0	0	0	0	0	0	0	2
2274	FHL2	1	1	2274	Gene_ID	H. sapiens	2274	H. sapiens	FHL2	four and a half LIM domains 2	GO:0055014 atrial cardiac muscle cell development;GO:0070885 negative regulation of calcineurin-NFAT signaling cascade;GO:0055011 atrial cardiac muscle cell differentiation			Actin filaments;Focal adhesion sites(Enhanced)		(M32)PID HDAC CLASSIII PATHWAY; (M58)PID AR PATHWAY	(M5942)HALLMARK UV RESPONSE DN; (M5906)HALLMARK ESTROGEN RESPONSE EARLY	0	0	0	0	0	0	0	0	0	0	0	0	0	0	0	0	0	0	0	0	2
23189	KANK1	1	1	23189	Gene_ID	H. sapiens	23189	H. sapiens	KANK1	KN motif and ankyrin repeat domains 1	GO:2000393 negative regulation of lamellipodium morphogenesis;GO:1900028 negative regulation of ruffle assembly;GO:0046627 negative regulation of insulin receptor signaling pathway			Plasma membrane(Supported)				0	0	0	0	0	1	0	0	0	0	0	0	1	0	1	0	0	0	1	1	2
7298	TYMS	1	1	7298	Gene_ID	H. sapiens	7298	H. sapiens	TYMS	thymidylate synthetase	GO:0006235 dTTP biosynthetic process;GO:0006231 dTMP biosynthetic process;GO:0060574 intestinal epithelial cell maturation		Enzymes/ENZYME proteins/Transferases		Raltitrexed (Thymidylate synthase activity);Floxuridine (Thymidylate synthase activity);Trifluridine (Thymidylate synthase activity);Trimethoprim (Thymidylate synthase activity);Gemcitabine (Thymidylate synthase activity);Fluorouracil (Thymidylate synthase activity);Pemetrexed (Thymidylate synthase activity);Capecitabine (Thymidylate synthase activity);Thymidine-5'-Phosphate (Thymidylate synthase…	(M40)PID E2F PATHWAY	(M5898)HALLMARK DNA REPAIR; (M5926)HALLMARK MYC TARGETS V1	1	0	1	1	0	0	0	0	0	0	0	0	0	0	0	0	0	0	0	0	2
9833	MELK	1	1	9833	Gene_ID	H. sapiens	9833	H. sapiens	MELK	maternal embryonic leucine zipper kinase	GO:0008631 intrinsic apoptotic signaling pathway in response to oxidative stress;GO:0036473 cell death in response to oxidative stress;GO:0000086 G2/M transition of mitotic cell cycle	CAMK Ser/Thr protein kinase family	Enzymes/{ENZYME proteins/Transferases,Kinases/CAMK Ser/Thr protein kinases}				(M5925)HALLMARK E2F TARGETS	0	0	1	0	0	0	0	0	0	0	0	1	0	0	0	0	0	0	0	0	2
3978	LIG1	1	1	3978	Gene_ID	H. sapiens	3978	H. sapiens	LIG1	DNA ligase 1	GO:1903461 Okazaki fragment processing involved in mitotic DNA replication;GO:0033567 DNA replication, Okazaki fragment processing;GO:0033151 V(D)J recombination		Enzymes/ENZYME proteins/Ligase	Nucleoplasm(Supported)Golgi apparatus;Vesicles(Approved)	Bleomycin (Metal ion binding)		(M5898)HALLMARK DNA REPAIR; (M5925)HALLMARK E2F TARGETS	1	1	0	1	1	0	0	0	0	0	0	0	0	1	0	0	0	0	0	0	2
3340	NDST1	1	1	3340	Gene_ID	H. sapiens	3340	H. sapiens	NDST1	N-deacetylase and N-sulfotransferase 1	GO:0030210 heparin biosynthetic process;GO:0048702 embryonic neurocranium morphogenesis;GO:0015014 heparan sulfate proteoglycan biosynthetic process, polysaccharide chain biosynthetic process		Enzymes/ENZYME proteins/Transferases		Adenosine-3'-5'-Diphosphate (Deacetylase activity)		(M5891)HALLMARK HYPOXIA	0	0	0	0	0	0	0	0	0	0	0	0	1	0	0	0	0	0	0	0	2
64946	CENPH	1	1	64946	Gene_ID	H. sapiens	64946	H. sapiens	CENPH	centromere protein H	GO:0034080 CENP-A containing nucleosome assembly;GO:0006336 DNA replication-independent nucleosome assembly;GO:0051382 kinetochore assembly			Nucleoli;Nucleus(Supported)				1	1	0	0	1	0	0	0	0	0	0	0	0	1	0	0	0	0	0	0	2
9918	NCAPD2	1	1	9918	Gene_ID	H. sapiens	9918	H. sapiens	NCAPD2	non-SMC condensin I complex subunit D2	GO:0010032 meiotic chromosome condensation;GO:0007076 mitotic chromosome condensation;GO:0030261 chromosome condensation			Cytosol;Nucleus(Supported)		(M14)PID AURORA B PATHWAY	(M5925)HALLMARK E2F TARGETS	1	1	0	0	1	0	0	1	1	0	0	0	0	1	0	1	0	0	0	0	2
4162	MCAM	1	1	4162	Gene_ID	H. sapiens	4162	H. sapiens	MCAM	melanoma cell adhesion molecule	GO:0061042 vascular wound healing;GO:0060055 angiogenesis involved in wound healing;GO:0003094 glomerular filtration		CD markers	Plasma membrane(Enhanced)				0	0	0	0	0	0	0	0	0	0	0	0	1	0	0	0	0	0	0	0	2
2202	EFEMP1	1	1	2202	Gene_ID	H. sapiens	2202	H. sapiens	EFEMP1	EGF containing fibulin extracellular matrix protein 1	GO:0048050 post-embryonic eye morphogenesis;GO:0032331 negative regulation of chondrocyte differentiation;GO:0061037 negative regulation of cartilage development			Mitochondria(Uncertain)		(M3008)NABA ECM GLYCOPROTEINS; (M5884)NABA CORE MATRISOME; (M5889)NABA MATRISOME	(M5942)HALLMARK UV RESPONSE DN	0	0	0	0	0	0	0	0	0	0	0	0	0	0	0	0	0	0	0	0	2
29028	ATAD2	1	1	29028	Gene_ID	H. sapiens	29028	H. sapiens	ATAD2	ATPase family AAA domain containing 2	GO:0031936 negative regulation of chromatin silencing;GO:0031935 regulation of chromatin silencing;GO:0060969 negative regulation of gene silencing		Enzymes/ENZYME proteins/Hydrolases	Nucleoplasm(Enhanced)			(M5925)HALLMARK E2F TARGETS	0	0	0	0	0	0	0	1	0	0	0	0	0	0	1	0	0	0	0	0	2
157313	CDCA2	1	1	157313	Gene_ID	H. sapiens	157313	H. sapiens	CDCA2	cell division cycle associated 2	GO:0035307 positive regulation of protein dephosphorylation;GO:0035306 positive regulation of dephosphorylation;GO:0035304 regulation of protein dephosphorylation			Nucleoplasm(Enhanced)				0	1	0	0	0	0	0	0	0	0	0	0	0	0	0	0	0	0	0	0	2
102	ADAM10	1	1	102	Gene_ID	H. sapiens	102	H. sapiens	ADAM10	ADAM metallopeptidase domain 10	GO:0010820 positive regulation of T cell chemotaxis;GO:0051089 constitutive protein ectodomain proteolysis;GO:0010819 regulation of T cell chemotaxis		CD markers;Enzymes/ENZYME proteins/Hydrolases;Transporters/Accessory Factors Involved in Transport	Plasma membrane;Vesicles(Supported)	XL784 (Zinc ion binding)	(M70)PID PS1 PATHWAY; (M142)PID AJDISS 2PATHWAY; (M17)PID NOTCH PATHWAY	(M5916)HALLMARK APICAL SURFACE; (M5910)HALLMARK PROTEIN SECRETION	0	0	0	0	0	0	0	0	0	0	0	0	1	0	0	0	0	0	1	1	2
54908	SPDL1	1	1	54908	Gene_ID	H. sapiens	54908	H. sapiens	SPDL1	spindle apparatus coiled-coil protein 1	GO:0007094 mitotic spindle assembly checkpoint;GO:0071174 mitotic spindle checkpoint;GO:0045841 negative regulation of mitotic metaphase/anaphase transition			Cytosol(Approved)				1	1	1	0	0	0	0	1	0	0	0	0	0	0	1	0	0	0	0	0	2
23468	CBX5	1	1	23468	Gene_ID	H. sapiens	23468	H. sapiens	CBX5	chromobox 5	GO:0070317 negative regulation of G0 to G1 transition;GO:0070316 regulation of G0 to G1 transition;GO:0045023 G0 to G1 transition			Nucleus(Enhanced)		(M14)PID AURORA B PATHWAY; (M40)PID E2F PATHWAY	(M5925)HALLMARK E2F TARGETS	0	0	1	0	0	0	0	0	1	0	0	0	0	0	0	0	0	1	0	0	2
116028	RMI2	1	1	116028	Gene_ID	H. sapiens	116028	H. sapiens	RMI2	RecQ mediated genome instability 2	GO:2000042 negative regulation of double-strand break repair via homologous recombination;GO:2000780 negative regulation of double-strand break repair;GO:0043007 maintenance of rDNA			Cytosol;Nuclear speckles(Supported)				1	1	1	1	1	0	0	1	0	1	0	0	0	0	0	0	0	0	0	0	2
23397	NCAPH	1	1	23397	Gene_ID	H. sapiens	23397	H. sapiens	NCAPH	non-SMC condensin I complex subunit H	GO:0051309 female meiosis chromosome separation;GO:2000373 positive regulation of DNA topoisomerase (ATP-hydrolyzing) activity;GO:0016321 female meiosis chromosome segregation			Cytosol;Nucleus(Supported)		(M14)PID AURORA B PATHWAY	(M5951)HALLMARK SPERMATOGENESIS	1	1	0	0	1	0	0	1	1	0	0	0	0	1	0	1	0	0	0	0	2
26037	SIPA1L1	1	1	26037	Gene_ID	H. sapiens	26037	H. sapiens	SIPA1L1	signal induced proliferation associated 1 like 1	GO:0061001 regulation of dendritic spine morphogenesis;GO:0060997 dendritic spine morphogenesis;GO:0060998 regulation of dendritic spine development			Actin filaments;Plasma membrane(Approved)			(M5942)HALLMARK UV RESPONSE DN	0	0	0	0	0	1	0	0	0	0	0	0	0	0	0	0	0	0	0	1	2
171024	SYNPO2	1	1	171024	Gene_ID	H. sapiens	171024	H. sapiens	SYNPO2	synaptopodin 2	GO:0032233 positive regulation of actin filament bundle assembly;GO:0061684 chaperone-mediated autophagy;GO:0032231 regulation of actin filament bundle assembly			Actin filaments(Supported)Cytosol;Vesicles(Approved)				0	0	0	0	0	1	0	0	0	0	0	0	0	0	0	0	0	0	0	0	2
3655	ITGA6	1	1	3655	Gene_ID	H. sapiens	3655	H. sapiens	ITGA6	integrin subunit alpha 6	GO:0031581 hemidesmosome assembly;GO:0035878 nail development;GO:0010668 ectodermal cell differentiation		CD markers;Transporters/Accessory Factors Involved in Transport			(M158)PID INTEGRIN4 PATHWAY; (M47)PID INTEGRIN CS PATHWAY; (M239)PID A6B1 A6B4 INTEGRIN PATHWAY	(M5947)HALLMARK IL2 STAT5 SIGNALING	0	0	0	0	0	0	0	0	0	0	0	0	1	0	0	0	0	1	1	1	2
2189	FANCG	1	1	2189	Gene_ID	H. sapiens	2189	H. sapiens	FANCG	FA complementation group G	GO:0001541 ovarian follicle development;GO:0008585 female gonad development;GO:0007286 spermatid development			Cytosol;Nucleoli(Supported)Plasma membrane(Approved)		(M258)PID BARD1 PATHWAY; (M1)PID FANCONI PATHWAY		0	0	0	0	1	0	0	0	0	0	0	0	0	0	0	0	0	0	0	0	2
4603	MYBL1	1	1	4603	Gene_ID	H. sapiens	4603	H. sapiens	MYBL1	MYB proto-oncogene like 1	GO:1990511 piRNA biosynthetic process;GO:0007141 male meiosis I;GO:0010529 negative regulation of transposition		Transcription factors/Helix-turn-helix domains			(M28)PID IL4 2PATHWAY	(M5906)HALLMARK ESTROGEN RESPONSE EARLY	0	1	0	0	0	0	0	0	0	0	0	0	0	0	0	1	0	0	0	0	2
3838	KPNA2	1	1	3838	Gene_ID	H. sapiens	3838	H. sapiens	KPNA2	karyopherin subunit alpha 2	GO:0075506 entry of viral genome into host nucleus through nuclear pore complex via importin;GO:0075732 viral penetration into host nucleus;GO:1902594 multi-organism nuclear import		Transporters/Transporter channels and pores	Cytosol;Nucleoplasm(Enhanced)		(M228)PID SMAD2 3PATHWAY; (M91)PID TCPTP PATHWAY; (M113)PID NFAT 3PATHWAY	(M5925)HALLMARK E2F TARGETS; (M5901)HALLMARK G2M CHECKPOINT; (M5926)HALLMARK MYC TARGETS V1	0	0	0	0	1	0	0	0	0	1	0	0	0	0	0	0	0	0	0	0	2
57451	TENM2	1	1	57451	Gene_ID	H. sapiens	57451	H. sapiens	TENM2	teneurin transmembrane protein 2	GO:0051491 positive regulation of filopodium assembly;GO:0051489 regulation of filopodium assembly;GO:0007157 heterophilic cell-cell adhesion via plasma membrane cell adhesion molecules			Nucleoli(Approved)			(M5956)HALLMARK KRAS SIGNALING DN	0	0	0	0	0	1	0	0	0	0	0	0	0	0	0	0	0	0	0	1	2
54821	ERCC6L	1	1	54821	Gene_ID	H. sapiens	54821	H. sapiens	ERCC6L	ERCC excision repair 6 like, spindle assembly checkpoint helicase	GO:0032508 DNA duplex unwinding;GO:0032392 DNA geometric change;GO:0071103 DNA conformation change		Enzymes/ENZYME proteins/Hydrolases	Centrosome;Cytosol;Nucleoplasm(Supported)		(M129)PID PLK1 PATHWAY		1	1	0	0	1	0	1	0	0	0	0	0	0	0	0	0	0	0	0	0	2
1434	CSE1L	1	1	1434	Gene_ID	H. sapiens	1434	H. sapiens	CSE1L	chromosome segregation 1 like	GO:0006606 protein import into nucleus;GO:0006611 protein export from nucleus;GO:0051170 import into nucleus		Transporters/Transporter channels and pores	Cytosol;Nucleoplasm(Enhanced)		(M261)PID P53 REGULATION PATHWAY; (M3270)ST INTEGRIN SIGNALING PATHWAY; (M145)PID P53 DOWNSTREAM PATHWAY	(M5925)HALLMARK E2F TARGETS	0	0	0	0	0	0	0	0	0	0	0	0	0	0	0	0	0	0	0	0	2
983	CDK1	1	1	983	Gene_ID	H. sapiens	983	H. sapiens	CDK1	cyclin dependent kinase 1	GO:1905448 positive regulation of mitochondrial ATP synthesis coupled electron transport;GO:0006977 DNA damage response, signal transduction by p53 class mediator resulting in cell cycle arrest;GO:1905446 regulation of mitochondrial ATP synthesis coupled electron transport	CMGC Ser/Thr protein kinase family	Enzymes/{ENZYME proteins/Transferases,Kinases/CMGC Ser/Thr protein kinases};Transporters/Transporter channels and pores	Cytosol;Nucleus(Enhanced)	Indirubin-3'-Monoxime (Rna polymerase ii carboxy-terminal domain kinase activity);Olomoucine (Rna polymerase ii carboxy-terminal domain kinase activity);Hymenialdisine (Rna polymerase ii carboxy-terminal domain kinase activity);SU9516 (Rna polymerase ii carboxy-terminal domain kinase activity);Flavopiridol (Rna polymerase ii carboxy-terminal domain kinase activity);Alsterpaullone (Rna polymerase …	(M10154)SA G2 AND M PHASES; (M207)PID RETINOIC ACID PATHWAY; (M176)PID FOXM1 PATHWAY	(M5923)HALLMARK PI3K AKT MTOR SIGNALING; (M5951)HALLMARK SPERMATOGENESIS; (M5893)HALLMARK MITOTIC SPINDLE	1	1	1	1	1	0	1	1	1	1	1	1	0	1	0	0	0	0	0	0	2
284992	CCDC150	1	1	284992	Gene_ID	H. sapiens	284992	H. sapiens	CCDC150	coiled-coil domain containing 150				Nucleoplasm(Approved)				0	0	0	0	0	0	0	0	0	0	0	0	0	0	0	0	0	0	0	0	2
23406	COTL1	1	1	23406	Gene_ID	H. sapiens	23406	H. sapiens	COTL1	coactosin like F-actin binding protein 1	GO:0043312 neutrophil degranulation;GO:0002283 neutrophil activation involved in immune response;GO:0030833 regulation of actin filament polymerization							0	0	0	0	0	1	0	0	0	0	0	0	0	0	0	0	0	0	0	0	2
64220	STRA6	1	1	64220	Gene_ID	H. sapiens	64220	H. sapiens	STRA6	signaling receptor and transporter of retinol STRA6	GO:0071939 vitamin A import;GO:0061143 alveolar primary septum development;GO:0071938 vitamin A transport		Transporters/Electrochemical Potential-driven transporters	Cytosol;Nucleus(Approved)				0	0	0	0	0	0	0	0	0	0	0	0	1	0	0	0	0	0	0	0	2
64859	NABP1	1	1	64859	Gene_ID	H. sapiens	64859	H. sapiens	NABP1	nucleic acid binding protein 1	GO:0042795 snRNA transcription by RNA polymerase II;GO:0009301 snRNA transcription;GO:0098781 ncRNA transcription			Nucleoplasm(Supported)Cytosol(Approved)			(M5922)HALLMARK UNFOLDED PROTEIN RESPONSE; (M5905)HALLMARK ADIPOGENESIS	0	0	1	0	1	0	0	0	0	0	0	0	0	0	0	0	0	0	0	0	2
10763	NES	1	1	10763	Gene_ID	H. sapiens	10763	H. sapiens	NES	nestin	GO:0030844 positive regulation of intermediate filament depolymerization;GO:0030842 regulation of intermediate filament depolymerization;GO:0045106 intermediate filament depolymerization			Intermediate filaments(Enhanced)				0	0	1	0	0	1	0	0	0	0	0	1	0	0	0	0	0	0	0	1	2
9397	NMT2	1	1	9397	Gene_ID	H. sapiens	9397	H. sapiens	NMT2	N-myristoyltransferase 2	GO:0018008 N-terminal peptidyl-glycine N-myristoylation;GO:0022400 regulation of rhodopsin mediated signaling pathway;GO:0006499 N-terminal protein myristoylation		Enzymes/ENZYME proteins/Transferases	Cytosol;Golgi apparatus;Plasma membrane(Supported)	Myristoyl-Coa (Glycylpeptide n-tetradecanoyltransferase activity);S-(2-Oxo)Pentadecylcoa (Glycylpeptide n-tetradecanoyltransferase activity);1-(CYCLOHEXYLAMINO)-3-(6-METHYL-3,4-DIHYDRO-1H-CARBAZOL-9(2H)-YL)PROPAN-2-OL (Glycylpeptide n-tetradecanoyltransferase activity);(Z)-3-BENZYL-5-(2-HYDROXY-3-NITROBENZYLIDENE)-2-THIOXOTHIAZOLIDIN-4-ONE (Glycylpeptide n-tetradecanoyltransferase activity)			0	0	0	0	0	0	0	0	0	0	0	0	0	0	0	0	0	0	0	0	2
8243	SMC1A	1	1	8243	Gene_ID	H. sapiens	8243	H. sapiens	SMC1A	structural maintenance of chromosomes 1A	GO:0072423 response to DNA damage checkpoint signaling;GO:1901673 regulation of mitotic spindle assembly;GO:0072402 response to DNA integrity checkpoint signaling			Nucleoplasm(Enhanced)Cytosol(Uncertain)		(M84)PID ATM PATHWAY	(M5893)HALLMARK MITOTIC SPINDLE; (M5925)HALLMARK E2F TARGETS; (M5901)HALLMARK G2M CHECKPOINT	1	1	1	1	1	1	0	1	0	0	0	0	0	0	0	1	0	0	0	0	2
1017	CDK2	1	1	1017	Gene_ID	H. sapiens	1017	H. sapiens	CDK2	cyclin dependent kinase 2	GO:0006977 DNA damage response, signal transduction by p53 class mediator resulting in cell cycle arrest;GO:0072431 signal transduction involved in mitotic G1 DNA damage checkpoint;GO:0032298 positive regulation of DNA-dependent DNA replication initiation	CMGC Ser/Thr protein kinase family	Enzymes/{ENZYME proteins/Transferases,Kinases/CMGC Ser/Thr protein kinases}	Nucleoplasm(Enhanced)Centrosome;Cytosol(Supported)	4-[5-(Trans-4-Aminocyclohexylamino)-3-Isopropylpyrazolo[1,5-a]Pyrimidin-7-Ylamino]-N,N-Dimethylbenzenesulfonamide (Metal ion binding);Staurosporine (Metal ion binding);Indirubin-3'-Monoxime (Metal ion binding);4-(2,4-Dimethyl-Thiazol-5-Yl)-Pyrimidin-2-Ylamine (Metal ion binding);Olomoucine (Metal ion binding);4-[(4-Imidazo[1,2-a]Pyridin-3-Ylpyrimidin-2-Yl)Amino]Benzenesulfonamide (Metal ion bindi…	(M3686)SA REG CASCADE OF CYCLIN EXPR; (M1529)SA G1 AND S PHASES; (M11)PID PRL SIGNALING EVENTS PATHWAY	(M5923)HALLMARK PI3K AKT MTOR SIGNALING; (M5941)HALLMARK UV RESPONSE UP; (M5902)HALLMARK APOPTOSIS	1	1	1	1	1	0	0	1	0	1	1	1	0	0	0	1	0	1	0	0	2
27346	TMEM97	1	1	27346	Gene_ID	H. sapiens	27346	H. sapiens	TMEM97	transmembrane protein 97	GO:0042632 cholesterol homeostasis;GO:0055092 sterol homeostasis;GO:0055088 lipid homeostasis			Cytosol;Nuclear membrane;Plasma membrane(Approved)			(M5928)HALLMARK MYC TARGETS V2; (M5892)HALLMARK CHOLESTEROL HOMEOSTASIS; (M5924)HALLMARK MTORC1 SIGNALING	0	0	0	0	0	0	0	0	0	0	0	0	0	0	0	0	0	0	0	0	2
7070	THY1	1	1	7070	Gene_ID	H. sapiens	7070	H. sapiens	THY1	Thy-1 cell surface antigen	GO:0051281 positive regulation of release of sequestered calcium ion into cytosol;GO:0046549 retinal cone cell development;GO:0051279 regulation of release of sequestered calcium ion into cytosol		CD markers	Nucleus;Plasma membrane(Approved)		(M169)PID INTEGRIN2 PATHWAY; (M159)PID AMB2 NEUTROPHILS PATHWAY; (M53)PID INTEGRIN3 PATHWAY	(M5919)HALLMARK HEDGEHOG SIGNALING; (M5916)HALLMARK APICAL SURFACE; (M5915)HALLMARK APICAL JUNCTION	0	0	0	0	0	1	0	0	0	1	0	0	1	0	1	0	0	0	1	1	2
781	CACNA2D1	1	1	781	Gene_ID	H. sapiens	781	H. sapiens	CACNA2D1	calcium voltage-gated channel auxiliary subunit alpha2delta 1	GO:0086048 membrane depolarization during bundle of His cell action potential;GO:1901843 positive regulation of high voltage-gated calcium channel activity;GO:0086043 bundle of His cell action potential		Transporters/Accessory Factors Involved in Transport		Isradipine (Voltage-gated calcium channel activity);Ibutilide (Voltage-gated calcium channel activity);Amlodipine (Voltage-gated calcium channel activity);Nisoldipine (Voltage-gated calcium channel activity);Nicardipine (Voltage-gated calcium channel activity);Magnesium Sulfate (Voltage-gated calcium channel activity);Gabapentin (Voltage-gated calcium channel activity);Felodipine (Voltage-gated c…			0	0	0	0	0	1	0	0	0	0	0	0	0	0	0	0	0	0	0	0	2
10112	KIF20A	1	1	10112	Gene_ID	H. sapiens	10112	H. sapiens	KIF20A	kinesin family member 20A	GO:0061952 midbody abscission;GO:1902410 mitotic cytokinetic process;GO:0032506 cytokinetic process			Cleavage furrow;Cytokinetic bridge(Supported)Nucleoplasm(Approved)		(M14)PID AURORA B PATHWAY; (M129)PID PLK1 PATHWAY	(M5937)HALLMARK GLYCOLYSIS; (M5907)HALLMARK ESTROGEN RESPONSE LATE	1	1	1	0	0	0	1	0	1	0	0	0	0	0	0	0	1	1	0	0	2
9404	LPXN	1	1	9404	Gene_ID	H. sapiens	9404	H. sapiens	LPXN	leupaxin	GO:0050859 negative regulation of B cell receptor signaling pathway;GO:0050855 regulation of B cell receptor signaling pathway;GO:0050858 negative regulation of antigen receptor-mediated signaling pathway			Cytosol;Focal adhesion sites(Enhanced)Nuclear speckles(Supported)				0	0	0	0	0	0	0	0	0	0	0	0	0	0	0	0	0	0	1	0	2
11227	GALNT5	1	1	11227	Gene_ID	H. sapiens	11227	H. sapiens	GALNT5	polypeptide N-acetylgalactosaminyltransferase 5	GO:0016266 O-glycan processing;GO:0006024 glycosaminoglycan biosynthetic process;GO:0006493 protein O-linked glycosylation		Enzymes/ENZYME proteins/Transferases	Cytosol;Golgi apparatus;Nucleoli;Vesicles(Approved)				0	0	0	0	0	0	0	0	0	0	0	0	0	0	0	0	0	0	0	0	2
730755	KRTAP2-3	1	1	730755	Gene_ID	H. sapiens	730755	H. sapiens	KRTAP2-3	keratin associated protein 2-3	GO:0031424 keratinization;GO:0030216 keratinocyte differentiation;GO:0009913 epidermal cell differentiation							0	0	0	0	0	0	0	0	0	0	0	0	0	0	0	0	0	0	0	0	2
259266	ASPM	1	1	259266	Gene_ID	H. sapiens	259266	H. sapiens	ASPM	assembly factor for spindle microtubules	GO:0045769 negative regulation of asymmetric cell division;GO:0021873 forebrain neuroblast division;GO:0051661 maintenance of centrosome location			Cytosol;Plasma membrane(Approved)				0	1	0	0	0	0	0	0	0	0	0	0	0	0	0	1	1	0	0	1	2
4249	MGAT5	1	1	4249	Gene_ID	H. sapiens	4249	H. sapiens	MGAT5	alpha-1,6-mannosylglycoprotein 6-beta-N-acetylglucosaminyltransferase	GO:1903614 negative regulation of protein tyrosine phosphatase activity;GO:1903613 regulation of protein tyrosine phosphatase activity;GO:0018279 protein N-linked glycosylation via asparagine		Enzymes/ENZYME proteins/Transferases					0	0	0	0	0	0	0	0	0	0	0	0	1	0	0	0	0	0	0	0	2
9837	GINS1	1	1	9837	Gene_ID	H. sapiens	9837	H. sapiens	GINS1	GINS complex subunit 1	GO:1902983 DNA strand elongation involved in mitotic DNA replication;GO:1902319 DNA strand elongation involved in nuclear cell cycle DNA replication;GO:0001833 inner cell mass cell proliferation			Nucleoplasm(Approved)			(M5925)HALLMARK E2F TARGETS	1	0	0	1	0	0	0	0	0	0	0	0	0	0	0	0	0	0	0	0	2
3187	HNRNPH1	1	1	3187	Gene_ID	H. sapiens	3187	H. sapiens	HNRNPH1	heterogeneous nuclear ribonucleoprotein H1	GO:0008543 fibroblast growth factor receptor signaling pathway;GO:0044344 cellular response to fibroblast growth factor stimulus;GO:0071774 response to fibroblast growth factor			Nucleoplasm(Supported)Cytosol(Approved)				0	0	0	0	0	0	0	0	0	0	0	0	0	0	0	0	0	0	0	0	2
6098	ROS1	1	1	6098	Gene_ID	H. sapiens	6098	H. sapiens	ROS1	ROS proto-oncogene 1, receptor tyrosine kinase	GO:0010966 regulation of phosphate transport;GO:0038083 peptidyl-tyrosine autophosphorylation;GO:0006817 phosphate ion transport	Tyr protein kinase family	Enzymes/{ENZYME proteins/Transferases,Kinases/Tyr protein kinases}	Vesicles(Approved)			(M5932)HALLMARK INFLAMMATORY RESPONSE	0	0	0	0	0	0	0	0	0	0	0	0	0	0	0	0	0	0	0	0	2
26289	AK5	1	1	26289	Gene_ID	H. sapiens	26289	H. sapiens	AK5	adenylate kinase 5	GO:0006173 dADP biosynthetic process;GO:0009183 purine deoxyribonucleoside diphosphate biosynthetic process;GO:0009153 purine deoxyribonucleotide biosynthetic process		Enzymes/ENZYME proteins/Transferases	Cytosol(Supported)Microtubule organizing center(Approved)				0	0	0	0	0	0	0	0	0	0	0	0	0	0	0	0	0	0	0	0	2
3832	KIF11	1	1	3832	Gene_ID	H. sapiens	3832	H. sapiens	KIF11	kinesin family member 11	GO:0046602 regulation of mitotic centrosome separation;GO:0007100 mitotic centrosome separation;GO:0051299 centrosome separation			Cytosol;Mitotic spindle(Supported)	3-[(5s)-1-Acetyl-3-(2-Chlorophenyl)-4,5-Dihydro-1h-Pyrazol-5-Yl]Phenol (Protein kinase binding);Monastrol (Protein kinase binding);(4R)-4-(3-HYDROXYPHENYL)-N,N,7,8-TETRAMETHYL-3,4-DIHYDROISOQUINOLINE-2(1H)-CARBOXAMIDE (Protein kinase binding);N,N-DIETHYL-2-[(2-THIENYLCARBONYL)AMINO]-4,5,6,7-TETRAHYDRO-1-BENZOTHIOPHENE-3-CARBOXAMIDE (Protein kinase binding);(5R)-N,N-DIETHYL-5-METHYL-2-[(THIOPHEN-2…		(M5893)HALLMARK MITOTIC SPINDLE; (M5901)HALLMARK G2M CHECKPOINT	0	1	1	0	0	1	0	1	0	0	0	0	0	0	0	0	0	1	0	0	2
445	ASS1	1	1	445	Gene_ID	H. sapiens	445	H. sapiens	ASS1	argininosuccinate synthase 1	GO:0071400 cellular response to oleic acid;GO:0000053 argininosuccinate metabolic process;GO:0006526 arginine biosynthetic process		Enzymes/ENZYME proteins/Ligase	Cytosol;Nucleoplasm(Approved)	L-Arginine (Toxic substance binding);L-Aspartic Acid (Toxic substance binding);L-Aspartic Acid (Toxic substance binding);L-Citrulline (Toxic substance binding);L-Citrulline (Toxic substance binding);Adenosine triphosphate (Toxic substance binding)		(M5907)HALLMARK ESTROGEN RESPONSE LATE	0	0	0	0	0	0	0	0	0	0	0	0	0	0	0	0	0	0	1	0	2
55215	FANCI	1	1	55215	Gene_ID	H. sapiens	55215	H. sapiens	FANCI	FA complementation group I	GO:0031398 positive regulation of protein ubiquitination;GO:0036297 interstrand cross-link repair;GO:1903322 positive regulation of protein modification by small protein conjugation or removal			Nucleoplasm(Enhanced)		(M1)PID FANCONI PATHWAY		0	0	0	0	1	0	0	0	0	0	0	0	0	0	0	0	0	0	0	0	2
8727	CTNNAL1	1	1	8727	Gene_ID	H. sapiens	8727	H. sapiens	CTNNAL1	catenin alpha like 1	GO:0007266 Rho protein signal transduction;GO:0007265 Ras protein signal transduction;GO:0007264 small GTPase mediated signal transduction							0	0	0	0	0	0	0	0	0	0	0	0	0	0	0	0	0	0	0	0	2
54801	HAUS6	1	1	54801	Gene_ID	H. sapiens	54801	H. sapiens	HAUS6	HAUS augmin like complex subunit 6	GO:0097711 ciliary basal body-plasma membrane docking;GO:0010389 regulation of G2/M transition of mitotic cell cycle;GO:0007098 centrosome cycle			Microtubule organizing center(Supported)Cytosol;Nuclear speckles(Approved)				1	1	1	0	0	0	0	0	0	0	0	1	0	0	0	0	0	0	0	0	2
11169	WDHD1	1	1	11169	Gene_ID	H. sapiens	11169	H. sapiens	WDHD1	WD repeat and HMG-box DNA binding protein 1	GO:0006261 DNA-dependent DNA replication;GO:0006260 DNA replication;GO:0006281 DNA repair			Nucleoplasm(Enhanced)				0	0	0	1	1	0	0	0	0	0	0	0	0	0	0	0	0	0	0	0	2
4751	NEK2	1	1	4751	Gene_ID	H. sapiens	4751	H. sapiens	NEK2	NIMA related kinase 2	GO:1903126 negative regulation of centriole-centriole cohesion;GO:0046602 regulation of mitotic centrosome separation;GO:0030997 regulation of centriole-centriole cohesion	NEK Ser/Thr protein kinase family	Enzymes/{ENZYME proteins/Transferases,Kinases/NEK Ser/Thr protein kinases}	Centrosome;Nucleus(Supported)	5-[(Z)-(5-CHLORO-2-OXO-1,2-DIHYDRO-3H-INDOL-3-YLIDENE)METHYL]-N-(DIETHYLAMINO)ETHYL]-2,4-DIMETHYL-1H-PYRROLE-3-CARBOXAMIDE (Protein serine/threonine kinase activity)	(M176)PID FOXM1 PATHWAY	(M5951)HALLMARK SPERMATOGENESIS; (M5893)HALLMARK MITOTIC SPINDLE; (M5901)HALLMARK G2M CHECKPOINT	1	1	1	0	0	1	0	1	0	1	0	1	0	0	1	1	0	0	0	0	2
23204	ARL6IP1	1	1	23204	Gene_ID	H. sapiens	23204	H. sapiens	ARL6IP1	ADP ribosylation factor like GTPase 6 interacting protein 1	GO:0002038 positive regulation of L-glutamate import across plasma membrane;GO:0002036 regulation of L-glutamate import across plasma membrane;GO:0098712 L-glutamate import across plasma membrane			Endoplasmic reticulum(Approved)			(M5898)HALLMARK DNA REPAIR	0	0	0	0	0	0	0	0	0	0	0	0	0	0	0	0	0	0	0	0	2
5010	CLDN11	1	1	5010	Gene_ID	H. sapiens	5010	H. sapiens	CLDN11	claudin 11	GO:0016338 calcium-independent cell-cell adhesion via plasma membrane cell-adhesion molecules;GO:0120192 tight junction assembly;GO:0120193 tight junction organization						(M5915)HALLMARK APICAL JUNCTION	0	0	0	0	0	0	0	0	0	0	0	0	0	0	0	0	0	0	0	0	2
25914	RTTN	1	1	25914	Gene_ID	H. sapiens	25914	H. sapiens	RTTN	rotatin	GO:0032053 ciliary basal body organization;GO:0010457 centriole-centriole cohesion;GO:0007099 centriole replication							0	1	0	0	0	0	0	0	0	0	0	1	0	0	0	0	0	0	0	0	2
1786	DNMT1	1	1	1786	Gene_ID	H. sapiens	1786	H. sapiens	DNMT1	DNA methyltransferase 1	GO:1905931 negative regulation of vascular smooth muscle cell differentiation involved in phenotypic switching;GO:1905916 negative regulation of cell differentiation involved in phenotypic switching;GO:1905930 regulation of vascular smooth muscle cell differentiation involved in phenotypic switching		Enzymes/ENZYME proteins/Transferases;Transcription factors/Zinc-coordinating DNA-binding domains	Nucleoplasm(Enhanced)	Azacitidine (Zinc ion binding);Procainamide (Zinc ion binding);Flucytosine (Zinc ion binding);Decitabine (Zinc ion binding)	(M279)PID RB 1PATHWAY	(M5925)HALLMARK E2F TARGETS	0	0	0	0	0	1	0	1	0	1	0	0	1	0	1	0	0	0	0	0	2
348995	NUP43	1	1	348995	Gene_ID	H. sapiens	348995	H. sapiens	NUP43	nucleoporin 43	GO:0006409 tRNA export from nucleus;GO:0006110 regulation of glycolytic process;GO:0071431 tRNA-containing ribonucleoprotein complex export from nucleus		Transporters/Transporter channels and pores					1	1	0	0	0	0	0	0	0	1	0	0	0	0	0	0	0	0	0	0	2
59	ACTA2	1	1	59	Gene_ID	H. sapiens	59	H. sapiens	ACTA2	actin alpha 2, smooth muscle	GO:0072144 glomerular mesangial cell development;GO:0072008 glomerular mesangial cell differentiation;GO:0072143 mesangial cell development			Actin filaments(Supported)		(M186)PID PDGFRB PATHWAY	(M5930)HALLMARK EPITHELIAL MESENCHYMAL TRANSITION	0	0	0	0	0	1	0	0	0	0	0	0	1	0	0	0	0	0	0	0	2
9050	PSTPIP2	1	1	9050	Gene_ID	H. sapiens	9050	H. sapiens	PSTPIP2	proline-serine-threonine phosphatase interacting protein 2	GO:0016477 cell migration;GO:0048870 cell motility;GO:0007010 cytoskeleton organization			Mitochondria;Nucleus;Plasma membrane(Approved)				0	0	0	0	0	0	0	0	0	0	0	0	0	0	0	0	0	0	0	0	2
79974	CPED1	1	1	79974	Gene_ID	H. sapiens	79974	H. sapiens	CPED1	cadherin like and PC-esterase domain containing 1				Nucleus(Approved)				0	0	0	0	0	0	0	0	0	0	0	0	0	0	0	0	0	0	0	0	2
481	ATP1B1	1	1	481	Gene_ID	H. sapiens	481	H. sapiens	ATP1B1	ATPase Na+/K+ transporting subunit beta 1	GO:1903281 positive regulation of calcium:sodium antiporter activity;GO:1903279 regulation of calcium:sodium antiporter activity;GO:1903278 positive regulation of sodium ion export across plasma membrane		Transporters/Primary Active Transporters				(M5936)HALLMARK OXIDATIVE PHOSPHORYLATION	0	0	0	0	0	0	0	0	0	0	0	0	0	0	0	0	0	1	0	0	2
23594	ORC6	1	1	23594	Gene_ID	H. sapiens	23594	H. sapiens	ORC6	origin recognition complex subunit 6	GO:0051782 negative regulation of cell division;GO:0006270 DNA replication initiation;GO:0000082 G1/S transition of mitotic cell cycle			Nucleoli fibrillar center;Nucleus(Approved)			(M5925)HALLMARK E2F TARGETS; (M5901)HALLMARK G2M CHECKPOINT	1	1	1	1	0	0	0	0	0	0	0	0	0	0	0	0	1	0	0	0	2
355	FAS	1	1	355	Gene_ID	H. sapiens	355	H. sapiens	FAS	Fas cell surface death receptor	GO:2001269 positive regulation of cysteine-type endopeptidase activity involved in apoptotic signaling pathway;GO:0097527 necroptotic signaling pathway;GO:0071455 cellular response to hyperoxia		CD markers	Plasma membrane(Supported)Cytosol(Approved)		(M5060)SA FAS SIGNALING; (M7997)SA CASPASE CASCADE; (M197)PID HIV NEF PATHWAY	(M5897)HALLMARK IL6 JAK STAT3 SIGNALING; (M5902)HALLMARK APOPTOSIS; (M5913)HALLMARK INTERFERON GAMMA RESPONSE	0	0	0	0	0	0	0	0	0	1	0	0	0	0	0	0	0	0	0	0	2
23670	TMEM2	1	1	23670	Gene_ID	H. sapiens	23670	H. sapiens	CEMIP2	cell migration inducing hyaluronidase 2	GO:0030214 hyaluronan catabolic process;GO:1903670 regulation of sprouting angiogenesis;GO:0030212 hyaluronan metabolic process			Cytosol;Vesicles(Approved)				0	0	0	0	0	0	0	0	0	0	0	0	1	0	0	0	0	0	0	0	2
701	BUB1B	1	1	701	Gene_ID	H. sapiens	701	H. sapiens	BUB1B	BUB1 mitotic checkpoint serine/threonine kinase B	GO:0007094 mitotic spindle assembly checkpoint;GO:0051754 meiotic sister chromatid cohesion, centromeric;GO:0071174 mitotic spindle checkpoint	Other	Enzymes/{ENZYME proteins/Transferases,Kinases}	Cytosol(Supported)		(M129)PID PLK1 PATHWAY	(M5925)HALLMARK E2F TARGETS	1	1	1	0	0	0	1	1	0	0	0	0	0	0	1	1	0	0	0	0	2
9055	PRC1	1	1	9055	Gene_ID	H. sapiens	9055	H. sapiens	PRC1	protein regulator of cytokinesis 1	GO:0000022 mitotic spindle elongation;GO:0051231 spindle elongation;GO:0007052 mitotic spindle organization					(M129)PID PLK1 PATHWAY	(M5893)HALLMARK MITOTIC SPINDLE; (M5901)HALLMARK G2M CHECKPOINT	1	1	1	0	0	0	1	0	0	0	0	0	0	0	0	0	1	0	0	0	2
55214	P3H2	1	1	55214	Gene_ID	H. sapiens	55214	H. sapiens	P3H2	prolyl 3-hydroxylase 2	GO:0019511 peptidyl-proline hydroxylation;GO:0018126 protein hydroxylation;GO:0018208 peptidyl-proline modification		Enzymes/ENZYME proteins/Oxidoreductases		Vitamin C (Procollagen-proline 3-dioxygenase activity);Succinic acid (Procollagen-proline 3-dioxygenase activity);L-Proline (Procollagen-proline 3-dioxygenase activity)	(M3468)NABA ECM REGULATORS; (M5885)NABA MATRISOME ASSOCIATED; (M5889)NABA MATRISOME		0	0	0	0	0	0	0	0	0	0	0	0	0	0	0	0	0	0	0	0	2
57185	NIPAL3	1	1	57185	Gene_ID	H. sapiens	57185	H. sapiens	NIPAL3	NIPA like domain containing 3	GO:1903830 magnesium ion transmembrane transport;GO:0015693 magnesium ion transport;GO:0070838 divalent metal ion transport		Transporters/Electrochemical Potential-driven transporters	Nucleoplasm(Approved)				0	0	0	0	0	0	0	0	0	0	0	0	0	0	0	0	0	0	0	0	2
57412	AS3MT	1	1	57412	Gene_ID	H. sapiens	57412	H. sapiens	AS3MT	arsenite methyltransferase	GO:0018872 arsonoacetate metabolic process;GO:0009404 toxin metabolic process;GO:0006805 xenobiotic metabolic process		Enzymes/ENZYME proteins/Transferases	Mitochondria;Nucleus(Approved)				0	0	0	0	0	0	0	0	0	0	0	0	0	0	0	0	0	0	0	0	2
54566	EPB41L4B	1	1	54566	Gene_ID	H. sapiens	54566	H. sapiens	EPB41L4B	erythrocyte membrane protein band 4.1 like 4B	GO:0051549 positive regulation of keratinocyte migration;GO:0051547 regulation of keratinocyte migration;GO:0051546 keratinocyte migration			Cytosol;Plasma membrane(Approved)				0	0	0	0	0	1	0	0	0	0	0	0	1	0	0	0	0	0	1	0	2
83895	KRTAP1-5	1	1	83895	Gene_ID	H. sapiens	83895	H. sapiens	KRTAP1-5	keratin associated protein 1-5	GO:0031424 keratinization;GO:0030216 keratinocyte differentiation;GO:0009913 epidermal cell differentiation							0	0	0	0	0	0	0	0	0	0	0	0	0	0	0	0	0	0	0	0	2
29965	CDIP1	1	1	29965	Gene_ID	H. sapiens	29965	H. sapiens	CDIP1	cell death inducing p53 target 1	GO:0042771 intrinsic apoptotic signaling pathway in response to DNA damage by p53 class mediator;GO:0072332 intrinsic apoptotic signaling pathway by p53 class mediator;GO:0033209 tumor necrosis factor-mediated signaling pathway			Centrosome;Nucleoplasm(Supported)				0	0	0	0	0	0	0	0	0	0	0	0	0	0	0	0	0	0	0	0	2
8754	ADAM9	1	1	8754	Gene_ID	H. sapiens	8754	H. sapiens	ADAM9	ADAM metallopeptidase domain 9	GO:0034241 positive regulation of macrophage fusion;GO:0051549 positive regulation of keratinocyte migration;GO:0034239 regulation of macrophage fusion			Endoplasmic reticulum;Vesicles(Approved)	INCB7839 (Zinc ion binding)	(M3468)NABA ECM REGULATORS; (M5885)NABA MATRISOME ASSOCIATED; (M5889)NABA MATRISOME	(M5946)HALLMARK COAGULATION; (M5921)HALLMARK COMPLEMENT; (M5915)HALLMARK APICAL JUNCTION	0	0	0	0	0	0	0	0	0	0	0	0	1	0	0	0	0	0	1	0	2
5111	PCNA	1	1	5111	Gene_ID	H. sapiens	5111	H. sapiens	PCNA	proliferating cell nuclear antigen	GO:0006977 DNA damage response, signal transduction by p53 class mediator resulting in cell cycle arrest;GO:1902990 mitotic telomere maintenance via semi-conservative replication;GO:0072431 signal transduction involved in mitotic G1 DNA damage checkpoint			Nuclear bodies;Nucleoplasm(Supported)		(M258)PID BARD1 PATHWAY; (M200)PID ERA GENOMIC PATHWAY; (M145)PID P53 DOWNSTREAM PATHWAY	(M5898)HALLMARK DNA REPAIR; (M5939)HALLMARK P53 PATHWAY; (M5925)HALLMARK E2F TARGETS	1	0	1	1	1	0	0	0	0	1	1	0	0	1	0	0	0	0	0	0	2
55752	SEPT11	1	1	55752	Gene_ID	H. sapiens	55752	H. sapiens	SEPTIN11	septin 11	GO:0061640 cytoskeleton-dependent cytokinesis;GO:0060271 cilium assembly;GO:0050807 regulation of synapse organization			Cytosol(Approved)				0	1	0	0	0	0	0	0	0	0	0	1	0	0	0	0	1	0	0	0	2
4628	MYH10	1	1	4628	Gene_ID	H. sapiens	4628	H. sapiens	MYH10	myosin heavy chain 10	GO:0055015 ventricular cardiac muscle cell development;GO:0021592 fourth ventricle development;GO:0021680 cerebellar Purkinje cell layer development			Actin filaments;Cytosol;Mitochondria(Enhanced)			(M5893)HALLMARK MITOTIC SPINDLE; (M5915)HALLMARK APICAL JUNCTION	1	1	0	0	0	1	0	0	0	0	0	0	1	0	0	0	1	0	0	1	2
8434	RECK	1	1	8434	Gene_ID	H. sapiens	8434	H. sapiens	RECK	reversion inducing cysteine rich protein with kazal motifs	GO:1904684 negative regulation of metalloendopeptidase activity;GO:1905049 negative regulation of metallopeptidase activity;GO:0090210 regulation of establishment of blood-brain barrier			Plasma membrane(Supported)				0	0	0	0	0	0	0	0	0	0	0	0	1	0	0	0	0	0	0	0	2
978	CDA	1	1	978	Gene_ID	H. sapiens	978	H. sapiens	CDA	cytidine deaminase	GO:0009972 cytidine deamination;GO:0006216 cytidine catabolic process;GO:0019858 cytosine metabolic process		Enzymes/ENZYME proteins/Hydrolases	Nucleoplasm(Approved)	1-Beta-Ribofuranosyl-1,3-Diazepinone (Zinc ion binding);DN-101 (Zinc ion binding)		(M5898)HALLMARK DNA REPAIR; (M5921)HALLMARK COMPLEMENT; (M5934)HALLMARK XENOBIOTIC METABOLISM	0	0	0	0	0	0	0	0	0	0	0	0	0	0	0	0	0	0	0	0	2
23576	DDAH1	1	1	23576	Gene_ID	H. sapiens	23576	H. sapiens	DDAH1	dimethylarginine dimethylaminohydrolase 1	GO:1900038 negative regulation of cellular response to hypoxia;GO:0006527 arginine catabolic process;GO:0000052 citrulline metabolic process		Enzymes/ENZYME proteins/Hydrolases	Cytosol;Nucleoli;Plasma membrane(Approved)	L-Citrulline (Metal ion binding)		(M5942)HALLMARK UV RESPONSE DN	0	0	0	0	0	0	0	0	0	1	0	0	1	0	0	0	0	0	0	0	2
147841	SPC24	1	1	147841	Gene_ID	H. sapiens	147841	H. sapiens	SPC24	SPC24 component of NDC80 kinetochore complex	GO:0051301 cell division;GO:0007049 cell cycle;GO:0009987 cellular process			Nucleoli;Nucleus(Supported)		(M129)PID PLK1 PATHWAY	(M5925)HALLMARK E2F TARGETS	1	1	0	0	0	0	1	0	0	0	0	0	0	0	0	0	0	0	0	0	2
5792	PTPRF	1	1	5792	Gene_ID	H. sapiens	5792	H. sapiens	PTPRF	protein tyrosine phosphatase receptor type F	GO:0048679 regulation of axon regeneration;GO:0007185 transmembrane receptor protein tyrosine phosphatase signaling pathway;GO:1900121 negative regulation of receptor binding		Enzymes/ENZYME proteins/Hydrolases	Golgi apparatus(Approved)				0	0	0	0	0	0	0	0	0	1	0	0	0	0	0	0	0	0	0	1	2
84171	LOXL4	1	1	84171	Gene_ID	H. sapiens	84171	H. sapiens	LOXL4	lysyl oxidase like 4	GO:0018057 peptidyl-lysine oxidation;GO:0018158 protein oxidation;GO:0030199 collagen fibril organization			Vesicles(Approved)		(M3468)NABA ECM REGULATORS; (M5885)NABA MATRISOME ASSOCIATED; (M5889)NABA MATRISOME		0	0	0	0	0	1	0	0	0	0	0	0	0	0	0	0	0	0	0	0	2
991	CDC20	1	1	991	Gene_ID	H. sapiens	991	H. sapiens	CDC20	cell division cycle 20	GO:0007094 mitotic spindle assembly checkpoint;GO:0071174 mitotic spindle checkpoint;GO:1904668 positive regulation of ubiquitin protein ligase activity			Cytosol;Nucleus(Enhanced)		(M129)PID PLK1 PATHWAY	(M5925)HALLMARK E2F TARGETS; (M5907)HALLMARK ESTROGEN RESPONSE LATE; (M5901)HALLMARK G2M CHECKPOINT	1	1	1	0	0	0	1	1	0	0	0	0	0	0	1	1	0	0	0	1	2
10383	TUBB4B	1	1	10383	Gene_ID	H. sapiens	10383	H. sapiens	TUBB4B	tubulin beta 4B class IVb	GO:0097711 ciliary basal body-plasma membrane docking;GO:0042267 natural killer cell mediated cytotoxicity;GO:0043312 neutrophil degranulation			Microtubules(Supported)	Albendazole (Unfolded protein binding);Mebendazole (Unfolded protein binding);Epothilone D (Unfolded protein binding);Epothilone B (Unfolded protein binding);Oxibendazole (Unfolded protein binding);CYT997 (Unfolded protein binding)			1	1	1	0	0	0	0	0	0	0	0	1	0	0	0	0	0	1	0	0	2
8492	PRSS12	1	1	8492	Gene_ID	H. sapiens	8492	H. sapiens	PRSS12	serine protease 12	GO:0031638 zymogen activation;GO:0016485 protein processing;GO:0006887 exocytosis		Enzymes/Peptidases/Serine-type peptidases	Actin filaments;Nucleus(Approved)		(M3468)NABA ECM REGULATORS; (M5885)NABA MATRISOME ASSOCIATED; (M5889)NABA MATRISOME		0	0	0	0	0	0	0	0	0	0	0	0	0	0	0	0	0	0	0	0	2
83468	GLT8D2	1	1	83468	Gene_ID	H. sapiens	83468	H. sapiens	GLT8D2	glycosyltransferase 8 domain containing 2				Cytosol(Approved)				0	0	0	0	0	0	0	0	0	0	0	0	0	0	0	0	0	0	0	0	2
55332	DRAM1	1	1	55332	Gene_ID	H. sapiens	55332	H. sapiens	DRAM1	DNA damage regulated autophagy modulator 1	GO:0010506 regulation of autophagy;GO:0006914 autophagy;GO:0031329 regulation of cellular catabolic process						(M5939)HALLMARK P53 PATHWAY; (M5890)HALLMARK TNFA SIGNALING VIA NFKB	0	0	0	0	0	0	0	0	0	0	0	0	0	0	0	0	0	0	0	0	2
5352	PLOD2	1	1	5352	Gene_ID	H. sapiens	5352	H. sapiens	PLOD2	procollagen-lysine,2-oxoglutarate 5-dioxygenase 2	GO:0046947 hydroxylysine biosynthetic process;GO:0046946 hydroxylysine metabolic process;GO:0017185 peptidyl-lysine hydroxylation		Enzymes/ENZYME proteins/Oxidoreductases	Cytosol;Nucleoli(Uncertain)	Vitamin C (Procollagen-lysine 5-dioxygenase activity)	(M3468)NABA ECM REGULATORS; (M5885)NABA MATRISOME ASSOCIATED; (M5889)NABA MATRISOME	(M5937)HALLMARK GLYCOLYSIS; (M5930)HALLMARK EPITHELIAL MESENCHYMAL TRANSITION; (M5924)HALLMARK MTORC1 SIGNALING	0	0	0	0	0	0	0	0	0	0	0	0	0	0	0	0	0	0	0	0	2
57724	EPG5	1	1	57724	Gene_ID	H. sapiens	57724	H. sapiens	EPG5	ectopic P-granules autophagy protein 5 homolog	GO:0034162 toll-like receptor 9 signaling pathway;GO:1990786 cellular response to dsDNA;GO:1990784 response to dsDNA			Nuclear speckles(Approved)				0	0	0	0	0	0	0	0	0	0	0	0	0	0	0	0	0	0	0	0	2
10721	POLQ	1	1	10721	Gene_ID	H. sapiens	10721	H. sapiens	POLQ	DNA polymerase theta	GO:0097681 double-strand break repair via alternative nonhomologous end joining;GO:2000042 negative regulation of double-strand break repair via homologous recombination;GO:0016446 somatic hypermutation of immunoglobulin genes		Enzymes/ENZYME proteins/Transferases	Cytosol;Golgi apparatus;Nucleus(Uncertain)			(M5901)HALLMARK G2M CHECKPOINT	0	0	0	1	1	0	0	0	0	1	0	0	0	0	0	0	0	0	0	0	2
8654	PDE5A	1	1	8654	Gene_ID	H. sapiens	8654	H. sapiens	PDE5A	phosphodiesterase 5A	GO:0060282 positive regulation of oocyte development;GO:0046069 cGMP catabolic process;GO:0055118 negative regulation of cardiac muscle contraction		Enzymes/ENZYME proteins/Hydrolases	Cytosol(Approved)	Sildenafil (Metal ion binding);Theophylline (Metal ion binding);Pentoxifylline (Metal ion binding);Tadalafil (Metal ion binding);Vardenafil (Metal ion binding);Dipyridamole (Metal ion binding);Guanosine-5'-Monophosphate (Metal ion binding);Gamma-Glutamyl[S-(2-Iodobenzyl)Cysteinyl]Glycine (Metal ion binding);Citric Acid (Metal ion binding);OSI-461 (Metal ion binding);Avanafil (Metal ion binding);U…			0	0	0	0	0	0	0	0	0	0	0	0	0	0	0	0	0	1	1	1	2
57120	GOPC	1	1	57120	Gene_ID	H. sapiens	57120	H. sapiens	GOPC	golgi associated PDZ and coiled-coil motif containing	GO:0043004 cytoplasmic sequestering of CFTR protein;GO:0043002 negative regulation of Golgi to plasma membrane CFTR protein transport;GO:0042999 regulation of Golgi to plasma membrane CFTR protein transport			Golgi apparatus(Enhanced)Cytosol(Supported)				1	0	0	0	0	0	0	0	0	0	0	0	0	0	0	0	0	0	0	0	2
79875	THSD4	1	1	79875	Gene_ID	H. sapiens	79875	H. sapiens	THSD4	thrombospondin type 1 domain containing 4	GO:0048251 elastic fiber assembly;GO:0085029 extracellular matrix assembly;GO:0030198 extracellular matrix organization			Nucleoli;Nucleus(Approved)		(M3008)NABA ECM GLYCOPROTEINS; (M5884)NABA CORE MATRISOME; (M5889)NABA MATRISOME	(M5906)HALLMARK ESTROGEN RESPONSE EARLY	0	0	0	0	0	1	0	0	0	0	0	0	0	0	0	0	0	0	0	0	2
3149	HMGB3	1	1	3149	Gene_ID	H. sapiens	3149	H. sapiens	HMGB3	high mobility group box 3	GO:0045578 negative regulation of B cell differentiation;GO:0045577 regulation of B cell differentiation;GO:0045620 negative regulation of lymphocyte differentiation			Nucleoli;Nucleus(Approved)			(M5925)HALLMARK E2F TARGETS; (M5901)HALLMARK G2M CHECKPOINT	0	0	0	0	1	0	0	0	0	0	0	0	0	1	0	0	0	0	0	0	2
55247	NEIL3	1	1	55247	Gene_ID	H. sapiens	55247	H. sapiens	NEIL3	nei like DNA glycosylase 3	GO:0006284 base-excision repair;GO:0006289 nucleotide-excision repair;GO:0006281 DNA repair		Enzymes/ENZYME proteins/Lyases	Nucleoplasm(Enhanced)				0	0	0	0	1	0	0	0	0	0	0	0	0	0	0	0	0	0	0	0	2
5935	RBM3	1	1	5935	Gene_ID	H. sapiens	5935	H. sapiens	RBM3	RNA binding motif protein 3	GO:0048026 positive regulation of mRNA splicing, via spliceosome;GO:0050685 positive regulation of mRNA processing;GO:0033120 positive regulation of RNA splicing			Nucleoplasm(Supported)				0	0	0	0	0	0	0	0	0	0	0	0	0	0	0	0	0	0	0	0	2
55320	MIS18BP1	1	1	55320	Gene_ID	H. sapiens	55320	H. sapiens	MIS18BP1	MIS18 binding protein 1	GO:0034080 CENP-A containing nucleosome assembly;GO:0006336 DNA replication-independent nucleosome assembly;GO:0031055 chromatin remodeling at centromere			Nucleoli(Supported)Cytosol(Uncertain)				1	1	0	0	1	0	0	0	0	0	0	0	0	1	0	0	0	0	0	0	2
1462	VCAN	1	1	1462	Gene_ID	H. sapiens	1462	H. sapiens	VCAN	versican	GO:0030208 dermatan sulfate biosynthetic process;GO:0030207 chondroitin sulfate catabolic process;GO:0030205 dermatan sulfate metabolic process			Vesicles(Supported)	Hyaluronic acid (Hyaluronic acid binding)	(M264)PID TOLL ENDOGENOUS PATHWAY; (M5882)NABA PROTEOGLYCANS; (M223)PID BETA CATENIN NUC PATHWAY	(M5944)HALLMARK ANGIOGENESIS; (M5937)HALLMARK GLYCOLYSIS; (M5915)HALLMARK APICAL JUNCTION	0	0	0	0	0	0	0	0	0	0	0	0	0	0	0	0	0	0	0	0	2
100500808	MIR3917	1	1	100500808	Gene_ID	H. sapiens	100500808	H. sapiens	MIR3917	microRNA 3917								0	0	0	0	0	0	0	0	0	0	0	0	0	0	0	0	0	0	0	0	2
26002	MOXD1	1	1	26002	Gene_ID	H. sapiens	26002	H. sapiens	MOXD1	monooxygenase DBH like 1	GO:0006589 octopamine biosynthetic process;GO:0042420 dopamine catabolic process;GO:0046333 octopamine metabolic process			Cytosol;Nucleoplasm(Approved)				0	0	0	0	0	0	0	0	0	0	0	0	0	0	0	0	0	0	0	0	2
9201	DCLK1	1	1	9201	Gene_ID	H. sapiens	9201	H. sapiens	DCLK1	doublecortin like kinase 1	GO:0021952 central nervous system projection neuron axonogenesis;GO:0021955 central nervous system neuron axonogenesis;GO:1900181 negative regulation of protein localization to nucleus	CAMK Ser/Thr protein kinase family	Enzymes/{ENZYME proteins/Transferases,Kinases/CAMK Ser/Thr protein kinases}	Cytosol;Nucleoplasm(Approved)				0	0	0	0	0	0	0	0	0	0	0	0	0	0	0	0	0	0	0	1	2
10036	CHAF1A	1	1	10036	Gene_ID	H. sapiens	10036	H. sapiens	CHAF1A	chromatin assembly factor 1 subunit A	GO:0006335 DNA replication-dependent nucleosome assembly;GO:0034723 DNA replication-dependent nucleosome organization;GO:0006334 nucleosome assembly			Nucleus(Supported)Cytosol(Uncertain)			(M5901)HALLMARK G2M CHECKPOINT	0	0	0	1	1	0	0	0	0	0	0	0	0	1	0	0	0	0	0	0	2
10186	LHFP	1	1	10186	Gene_ID	H. sapiens	10186	H. sapiens	LHFPL6	LHFPL tetraspan subfamily member 6				Nucleoli(Approved)				0	0	0	0	0	0	0	0	0	0	0	0	0	0	0	0	0	0	0	0	2
55143	CDCA8	1	1	55143	Gene_ID	H. sapiens	55143	H. sapiens	CDCA8	cell division cycle associated 8	GO:0007080 mitotic metaphase plate congression;GO:0051310 metaphase plate congression;GO:0051303 establishment of chromosome localization			Cytokinetic bridge;Nucleoli;Nucleus(Supported)		(M14)PID AURORA B PATHWAY	(M5925)HALLMARK E2F TARGETS	1	1	0	0	0	0	0	0	1	0	0	0	0	0	0	0	0	0	0	0	2
84131	CEP78	1	1	84131	Gene_ID	H. sapiens	84131	H. sapiens	CEP78	centrosomal protein 78	GO:0097711 ciliary basal body-plasma membrane docking;GO:0010389 regulation of G2/M transition of mitotic cell cycle;GO:1902749 regulation of cell cycle G2/M phase transition							1	0	1	0	0	0	0	0	0	0	0	1	0	0	0	0	0	0	0	0	2
920	CD4	1	1	920	Gene_ID	H. sapiens	920	H. sapiens	CD4	CD4 molecule	GO:0019064 fusion of virus membrane with host plasma membrane;GO:0006948 induction by virus of host cell-cell fusion;GO:0046598 positive regulation of viral entry into host cell		CD markers	Plasma membrane(Supported)	Anti-thymocyte Globulin (Rabbit) (Zinc ion binding)	(M243)PID ARF 3PATHWAY; (M290)PID IL12 STAT4 PATHWAY; (M196)PID IL23 PATHWAY	(M5950)HALLMARK ALLOGRAFT REJECTION	0	0	0	0	0	0	0	0	0	0	0	0	0	0	0	0	0	0	1	0	2
55901	THSD1	1	1	55901	Gene_ID	H. sapiens	55901	H. sapiens	THSD1	thrombospondin type 1 domain containing 1				Cytosol(Enhanced)				0	0	0	0	0	0	0	0	0	0	0	0	0	0	0	0	0	0	0	0	2
2744	GLS	1	1	2744	Gene_ID	H. sapiens	2744	H. sapiens	GLS	glutaminase	GO:0006543 glutamine catabolic process;GO:0090461 glutamate homeostasis;GO:0006537 glutamate biosynthetic process		Enzymes/ENZYME proteins/Hydrolases	Mitochondria(Supported)	L-Glutamic Acid (Glutaminase activity)		(M5941)HALLMARK UV RESPONSE UP	0	0	0	0	0	0	0	0	0	0	0	0	0	0	0	0	0	0	0	0	2
5983	RFC3	1	1	5983	Gene_ID	H. sapiens	5983	H. sapiens	RFC3	replication factor C subunit 3	GO:1900264 positive regulation of DNA-directed DNA polymerase activity;GO:0032201 telomere maintenance via semi-conservative replication;GO:0070987 error-free translesion synthesis			Nucleoplasm(Supported)Vesicles(Approved)		(M46)PID ATR PATHWAY; (M1)PID FANCONI PATHWAY	(M5898)HALLMARK DNA REPAIR; (M5925)HALLMARK E2F TARGETS	1	0	0	1	1	0	0	0	0	1	0	0	0	1	0	0	0	0	0	0	2
3855	KRT7	1	1	3855	Gene_ID	H. sapiens	3855	H. sapiens	KRT7	keratin 7	GO:0070268 cornification;GO:0031424 keratinization;GO:0030216 keratinocyte differentiation				Primaquine (Structural molecule activity);HspE7 (Structural molecule activity)			0	0	0	0	0	0	0	0	0	0	0	0	0	0	0	0	0	0	0	0	2
25886	POC1A	1	1	25886	Gene_ID	H. sapiens	25886	H. sapiens	POC1A	POC1 centriolar protein A	GO:0003431 growth plate cartilage chondrocyte development;GO:0010825 positive regulation of centrosome duplication;GO:0003433 chondrocyte development involved in endochondral bone morphogenesis							0	1	1	0	0	1	0	0	0	0	1	1	0	0	0	0	0	0	0	0	2
3597	IL13RA1	1	1	3597	Gene_ID	H. sapiens	3597	H. sapiens	IL13RA1	interleukin 13 receptor subunit alpha 1	GO:0019221 cytokine-mediated signaling pathway;GO:0071345 cellular response to cytokine stimulus;GO:0034097 response to cytokine		CD markers	Golgi apparatus;Nucleoplasm(Approved)		(M17580)ST IL 13 PATHWAY; (M9378)ST INTERLEUKIN 4 PATHWAY; (M28)PID IL4 2PATHWAY	(M5897)HALLMARK IL6 JAK STAT3 SIGNALING; (M5937)HALLMARK GLYCOLYSIS	0	0	0	0	0	0	0	0	0	0	0	0	0	0	0	0	0	0	0	0	2
2237	FEN1	1	1	2237	Gene_ID	H. sapiens	2237	H. sapiens	FEN1	flap structure-specific endonuclease 1	GO:0043137 DNA replication, removal of RNA primer;GO:0032201 telomere maintenance via semi-conservative replication;GO:0045876 positive regulation of sister chromatid cohesion			Nucleoli;Nucleoplasm(Enhanced)			(M5898)HALLMARK DNA REPAIR; (M5941)HALLMARK UV RESPONSE UP	1	1	1	1	1	1	0	1	0	0	1	0	0	1	0	0	0	0	0	0	2
22936	ELL2	1	1	22936	Gene_ID	H. sapiens	22936	H. sapiens	ELL2	elongation factor for RNA polymerase II 2	GO:0042795 snRNA transcription by RNA polymerase II;GO:0009301 snRNA transcription;GO:0006368 transcription elongation from RNA polymerase II promoter			Nucleoplasm(Supported)			(M5908)HALLMARK ANDROGEN RESPONSE; (M5945)HALLMARK HEME METABOLISM	0	0	0	0	0	0	0	0	0	0	0	0	0	0	0	0	0	0	0	0	2
501	ALDH7A1	1	1	501	Gene_ID	H. sapiens	501	H. sapiens	ALDH7A1	aldehyde dehydrogenase 7 family member A1	GO:0019285 glycine betaine biosynthetic process from choline;GO:0042426 choline catabolic process;GO:0031456 glycine betaine biosynthetic process		Enzymes/ENZYME proteins/Oxidoreductases	Cytosol;Mitochondria(Supported)	NADH (L-aminoadipate-semialdehyde dehydrogenase activity)		(M5937)HALLMARK GLYCOLYSIS	0	0	0	0	0	0	0	0	0	0	0	0	0	0	0	0	0	0	0	0	2
11080	DNAJB4	1	1	11080	Gene_ID	H. sapiens	11080	H. sapiens	DNAJB4	DnaJ heat shock protein family (Hsp40) member B4	GO:0051085 chaperone cofactor-dependent protein refolding;GO:0032781 positive regulation of ATPase activity;GO:0051084 'de novo' posttranslational protein folding			Cytosol;Nucleoplasm;Plasma membrane(Enhanced)			(M5890)HALLMARK TNFA SIGNALING VIA NFKB	0	0	0	0	0	0	0	0	0	0	0	0	0	0	0	0	0	0	0	0	2
10376	TUBA1B	1	1	10376	Gene_ID	H. sapiens	10376	H. sapiens	TUBA1B	tubulin alpha 1b	GO:0071353 cellular response to interleukin-4;GO:0070670 response to interleukin-4;GO:0030705 cytoskeleton-dependent intracellular transport			Microtubules(Supported)	Epothilone D (Ubiquitin protein ligase binding);Epothilone B (Ubiquitin protein ligase binding);CYT997 (Ubiquitin protein ligase binding);2-MERCAPTO-N-[1,2,3,10-TETRAMETHOXY-9-OXO-5,6,7,9-TETRAHYDRO-BENZO[A]HEPTALEN-7-YL]ACETAMIDE (Ubiquitin protein ligase binding)	(M11)PID PRL SIGNALING EVENTS PATHWAY; (M32)PID HDAC CLASSIII PATHWAY; (M30)PID HDAC CLASSII PATHWAY		1	1	0	0	0	0	0	0	0	0	0	1	0	0	0	0	0	1	0	0	2
100132596	XGY2	1	1	100132596	Gene_ID	H. sapiens	100132596	H. sapiens	XGY2	XG pseudogene, Y-linked 2								0	0	0	0	0	0	0	0	0	0	0	0	0	0	0	0	0	0	0	0	2
3887	KRT81	1	1	3887	Gene_ID	H. sapiens	3887	H. sapiens	KRT81	keratin 81	GO:0070268 cornification;GO:0031424 keratinization;GO:0030216 keratinocyte differentiation							0	0	0	0	0	0	0	0	0	0	0	0	0	0	0	0	0	0	0	0	2
65983	GRAMD3	1	1	65983	Gene_ID	H. sapiens	65983	H. sapiens	GRAMD2B	GRAM domain containing 2B				Cytosol;Golgi apparatus;Nucleoplasm(Approved)				0	0	0	0	0	0	0	0	0	0	0	0	0	0	0	0	0	0	0	0	2
2317	FLNB	1	1	2317	Gene_ID	H. sapiens	2317	H. sapiens	FLNB	filamin B	GO:0003334 keratinocyte development;GO:0007016 cytoskeletal anchoring at plasma membrane;GO:0003382 epithelial cell morphogenesis		Transporters/Accessory Factors Involved in Transport	Cytosol;Plasma membrane(Supported)Actin filaments;Golgi apparatus(Approved)			(M5893)HALLMARK MITOTIC SPINDLE; (M5906)HALLMARK ESTROGEN RESPONSE EARLY; (M5907)HALLMARK ESTROGEN RESPONSE LATE	0	0	0	0	0	1	0	0	0	0	0	0	0	0	0	0	0	0	0	1	2
9212	AURKB	1	1	9212	Gene_ID	H. sapiens	9212	H. sapiens	AURKB	aurora kinase B	GO:1905116 positive regulation of lateral attachment of mitotic spindle microtubules to kinetochore;GO:1905115 regulation of lateral attachment of mitotic spindle microtubules to kinetochore;GO:1902425 positive regulation of attachment of mitotic spindle microtubules to kinetochore	Other	Enzymes/{ENZYME proteins/Transferases,Kinases}	Midbody;Nucleoplasm(Enhanced)	HESPERIDIN (Protein serine/threonine/tyrosine kinase activity);AT9283 (Protein serine/threonine/tyrosine kinase activity);N~6~-cyclohexyl-N~2~-(4-morpholin-4-ylphenyl)-9H-purine-2,6-diamine (Protein serine/threonine/tyrosine kinase activity)	(M242)PID AURORA A PATHWAY; (M14)PID AURORA B PATHWAY; (M176)PID FOXM1 PATHWAY	(M5925)HALLMARK E2F TARGETS; (M5901)HALLMARK G2M CHECKPOINT	1	1	1	0	0	1	0	1	1	1	1	1	0	0	1	0	1	0	0	0	2
29127	RACGAP1	1	1	29127	Gene_ID	H. sapiens	29127	H. sapiens	RACGAP1	Rac GTPase activating protein 1	GO:0051256 mitotic spindle midzone assembly;GO:0051255 spindle midzone assembly;GO:0000915 actomyosin contractile ring assembly			Nucleoplasm(Enhanced)		(M83)PID CDC42 REG PATHWAY; (M241)PID RAC1 REG PATHWAY; (M14)PID AURORA B PATHWAY	(M5893)HALLMARK MITOTIC SPINDLE; (M5925)HALLMARK E2F TARGETS; (M5901)HALLMARK G2M CHECKPOINT	1	1	1	0	0	1	0	1	1	0	1	0	0	1	0	0	1	1	0	0	2
57552	NCEH1	1	1	57552	Gene_ID	H. sapiens	57552	H. sapiens	NCEH1	neutral cholesterol ester hydrolase 1	GO:0034383 low-density lipoprotein particle clearance;GO:0034381 plasma lipoprotein particle clearance;GO:0097006 regulation of plasma lipoprotein particle levels			Endoplasmic reticulum(Approved)				0	0	0	0	0	0	0	0	0	0	0	0	0	0	0	0	0	0	0	0	2
64747	MFSD1	1	1	64747	Gene_ID	H. sapiens	64747	H. sapiens	MFSD1	major facilitator superfamily domain containing 1	GO:0055085 transmembrane transport;GO:0006810 transport;GO:0051234 establishment of localization			Nucleoli;Nucleus(Approved)				0	0	0	0	0	0	0	0	0	0	0	0	0	0	0	0	0	0	0	0	2
1123	CHN1	1	1	1123	Gene_ID	H. sapiens	1123	H. sapiens	CHN1	chimerin 1	GO:0008045 motor neuron axon guidance;GO:0050770 regulation of axonogenesis;GO:0048013 ephrin receptor signaling pathway			Cytosol(Approved)		(M241)PID RAC1 REG PATHWAY		1	0	0	0	0	0	0	0	0	0	0	0	0	0	0	0	0	0	0	1	2
84930	MASTL	1	1	84930	Gene_ID	H. sapiens	84930	H. sapiens	MASTL	microtubule associated serine/threonine kinase like	GO:0007147 female meiosis II;GO:1904668 positive regulation of ubiquitin protein ligase activity;GO:1904666 regulation of ubiquitin protein ligase activity	AGC Ser/Thr protein kinase family	Enzymes/{ENZYME proteins/Transferases,Kinases/AGC Ser/Thr protein kinases}	Nucleoplasm(Enhanced)				1	1	1	0	0	0	0	0	0	0	0	1	0	0	0	1	0	0	0	0	2
5393	EXOSC9	1	1	5393	Gene_ID	H. sapiens	5393	H. sapiens	EXOSC9	exosome component 9	GO:0071038 nuclear polyadenylation-dependent tRNA catabolic process;GO:0071035 nuclear polyadenylation-dependent rRNA catabolic process;GO:0071046 nuclear polyadenylation-dependent ncRNA catabolic process			Nucleoli(Enhanced)Nucleus(Supported)			(M5922)HALLMARK UNFOLDED PROTEIN RESPONSE	0	0	0	0	0	0	0	0	0	0	0	0	0	0	0	0	0	0	0	0	2
63901	FAM111A	1	1	63901	Gene_ID	H. sapiens	63901	H. sapiens	FAM111A	family with sequence similarity 111 member A	GO:0045071 negative regulation of viral genome replication;GO:1903901 negative regulation of viral life cycle;GO:0045069 regulation of viral genome replication			Nucleoli fibrillar center;Nucleus(Approved)				0	0	0	1	0	0	0	0	0	0	0	0	0	0	0	0	0	0	0	0	2
27075	TSPAN13	1	1	27075	Gene_ID	H. sapiens	27075	H. sapiens	TSPAN13	tetraspanin 13	GO:1903169 regulation of calcium ion transmembrane transport;GO:0051924 regulation of calcium ion transport;GO:0070588 calcium ion transmembrane transport			Nucleus(Approved)			(M5953)HALLMARK KRAS SIGNALING UP; (M5907)HALLMARK ESTROGEN RESPONSE LATE	0	0	0	0	0	0	0	0	0	0	0	0	0	0	0	0	0	0	0	0	2
64710	NUCKS1	1	1	64710	Gene_ID	H. sapiens	64710	H. sapiens	NUCKS1	nuclear casein kinase and cyclin dependent kinase substrate 1	GO:1990969 modulation by host of viral RNA-binding transcription factor activity;GO:1990968 modulation by host of RNA binding by virus;GO:0044829 positive regulation by host of viral genome replication			Nucleus(Supported)Nucleoli(Approved)				0	0	0	1	1	0	0	0	0	1	0	0	0	0	0	0	0	0	0	0	2
9710	KIAA0355	1	1	9710	Gene_ID	H. sapiens	9710	H. sapiens	GARRE1	granule associated Rac and RHOG effector 1				Nucleoplasm(Approved)				0	0	0	0	0	0	0	0	0	0	0	0	0	0	0	0	0	0	0	0	2
1009	CDH11	1	1	1009	Gene_ID	H. sapiens	1009	H. sapiens	CDH11	cadherin 11	GO:0021957 corticospinal tract morphogenesis;GO:0021952 central nervous system projection neuron axonogenesis;GO:0021955 central nervous system neuron axonogenesis						(M5915)HALLMARK APICAL JUNCTION; (M5930)HALLMARK EPITHELIAL MESENCHYMAL TRANSITION	0	0	0	0	0	0	0	0	0	0	0	0	0	0	0	0	0	0	0	1	2
83461	CDCA3	1	1	83461	Gene_ID	H. sapiens	83461	H. sapiens	CDCA3	cell division cycle associated 3	GO:0016567 protein ubiquitination;GO:0032446 protein modification by small protein conjugation;GO:0051301 cell division			Cytosol(Approved)			(M5925)HALLMARK E2F TARGETS	0	1	0	0	0	0	0	0	0	0	0	0	0	0	0	0	0	0	0	0	2
1026	CDKN1A	1	1	1026	Gene_ID	H. sapiens	1026	H. sapiens	CDKN1A	cyclin dependent kinase inhibitor 1A	GO:0006977 DNA damage response, signal transduction by p53 class mediator resulting in cell cycle arrest;GO:1905179 negative regulation of cardiac muscle tissue regeneration;GO:0060574 intestinal epithelial cell maturation			Nuclear bodies;Nucleoplasm(Supported)		(M10154)SA G2 AND M PHASES; (M1529)SA G1 AND S PHASES; (M18895)SA TRKA RECEPTOR	(M5923)HALLMARK PI3K AKT MTOR SIGNALING; (M5902)HALLMARK APOPTOSIS; (M5932)HALLMARK INFLAMMATORY RESPONSE	1	0	1	1	0	0	0	0	0	1	1	1	0	0	0	0	0	0	0	0	2
23231	SEL1L3	1	1	23231	Gene_ID	H. sapiens	23231	H. sapiens	SEL1L3	SEL1L family member 3				Nucleus(Enhanced)				0	0	0	0	0	0	0	0	0	0	0	0	0	0	0	0	0	0	0	0	2
145508	CEP128	1	1	145508	Gene_ID	H. sapiens	145508	H. sapiens	CEP128	centrosomal protein 128	GO:0008104 protein localization;GO:0033036 macromolecule localization;GO:0051179 localization			Microtubule organizing center(Supported)Cytosol(Approved)				0	0	0	0	0	0	0	0	0	0	0	0	0	0	0	0	0	0	0	0	2
5631	PRPS1	1	1	5631	Gene_ID	H. sapiens	5631	H. sapiens	PRPS1	phosphoribosyl pyrophosphate synthetase 1	GO:0046101 hypoxanthine biosynthetic process;GO:0034418 urate biosynthetic process;GO:0046100 hypoxanthine metabolic process		Enzymes/ENZYME proteins/Transferases	Cytosol(Approved)			(M5937)HALLMARK GLYCOLYSIS; (M5925)HALLMARK E2F TARGETS	0	0	0	0	0	0	0	0	0	0	0	0	0	0	0	0	0	0	0	0	2
4200	ME2	1	1	4200	Gene_ID	H. sapiens	4200	H. sapiens	ME2	malic enzyme 2	GO:1902031 regulation of NADP metabolic process;GO:0006108 malate metabolic process;GO:0006739 NADP metabolic process		Enzymes/ENZYME proteins/Oxidoreductases	Mitochondria(Enhanced)	NADH (Oxaloacetate decarboxylase activity);Fumarate (Oxaloacetate decarboxylase activity);Malate Ion (Oxaloacetate decarboxylase activity);Alpha-Ketomalonic Acid (Oxaloacetate decarboxylase activity);Tartronate (Oxaloacetate decarboxylase activity)		(M5937)HALLMARK GLYCOLYSIS	0	0	0	0	0	0	0	0	0	0	0	0	0	0	0	0	0	0	0	0	2
55236	UBA6	1	1	55236	Gene_ID	H. sapiens	55236	H. sapiens	UBA6	ubiquitin like modifier activating enzyme 6	GO:0021764 amygdala development;GO:0021766 hippocampus development;GO:0060996 dendritic spine development		Enzymes/ENZYME proteins/Ligase	Cytosol;Nucleoplasm(Enhanced)				0	0	0	0	0	0	0	0	0	0	0	0	0	0	0	0	0	0	0	0	2
4148	MATN3	1	1	4148	Gene_ID	H. sapiens	4148	H. sapiens	MATN3	matrilin 3	GO:0003429 growth plate cartilage chondrocyte morphogenesis;GO:0003414 chondrocyte morphogenesis involved in endochondral bone morphogenesis;GO:0003422 growth plate cartilage morphogenesis			Endoplasmic reticulum;Golgi apparatus(Approved)		(M3008)NABA ECM GLYCOPROTEINS; (M5884)NABA CORE MATRISOME; (M5889)NABA MATRISOME	(M5930)HALLMARK EPITHELIAL MESENCHYMAL TRANSITION	0	0	0	0	0	0	0	0	0	0	0	0	0	0	0	0	0	0	0	1	2
3939	LDHA	1	1	3939	Gene_ID	H. sapiens	3939	H. sapiens	LDHA	lactate dehydrogenase A	GO:0006096 glycolytic process;GO:0006757 ATP generation from ADP;GO:0006089 lactate metabolic process		Enzymes/ENZYME proteins/Oxidoreductases	Cytosol(Supported)Vesicles(Approved)	NADH (Nad binding);Etheno-Nad (Nad binding);Nicotinamide (Nad binding);Oxamic Acid (Nad binding)	(M255)PID HIF1 TFPATHWAY; (M66)PID MYC ACTIV PATHWAY	(M5935)HALLMARK FATTY ACID METABOLISM; (M5891)HALLMARK HYPOXIA; (M5937)HALLMARK GLYCOLYSIS	0	0	0	0	0	0	0	0	0	0	0	0	0	0	0	0	0	0	0	0	2
5865	RAB3B	1	1	5865	Gene_ID	H. sapiens	5865	H. sapiens	RAB3B	RAB3B, member RAS oncogene family	GO:0051586 positive regulation of dopamine uptake involved in synaptic transmission;GO:0051944 positive regulation of catecholamine uptake involved in synaptic transmission;GO:0051584 regulation of dopamine uptake involved in synaptic transmission			Cell Junctions(Approved)				0	0	0	0	0	1	0	0	0	0	0	1	0	0	0	0	0	0	0	0	2
1265	CNN2	1	1	1265	Gene_ID	H. sapiens	1265	H. sapiens	CNN2	calponin 2	GO:0035722 interleukin-12-mediated signaling pathway;GO:0071349 cellular response to interleukin-12;GO:0043312 neutrophil degranulation			Actin filaments;Cytosol;Nucleoplasm(Approved)			(M5915)HALLMARK APICAL JUNCTION	0	0	0	0	0	1	0	0	0	0	0	0	0	0	0	0	0	0	0	0	2
1163	CKS1B	1	1	1163	Gene_ID	H. sapiens	1163	H. sapiens	CKS1B	CDC28 protein kinase regulatory subunit 1B	GO:0045737 positive regulation of cyclin-dependent protein serine/threonine kinase activity;GO:1904031 positive regulation of cyclin-dependent protein kinase activity;GO:0000079 regulation of cyclin-dependent protein serine/threonine kinase activity			Cytosol;Mitochondria;Nucleus;Vesicles(Approved)	Meta Vanadate (Cyclin-dependent protein serine/threonine kinase regulator activity)	(M176)PID FOXM1 PATHWAY	(M5922)HALLMARK UNFOLDED PROTEIN RESPONSE; (M5925)HALLMARK E2F TARGETS; (M5901)HALLMARK G2M CHECKPOINT	1	1	1	1	0	0	0	0	0	0	1	0	0	0	0	0	0	0	0	0	2
388	RHOB	1	1	388	Gene_ID	H. sapiens	388	H. sapiens	RHOB	ras homolog family member B	GO:0061154 endothelial tube morphogenesis;GO:0010595 positive regulation of endothelial cell migration;GO:0003159 morphogenesis of an endothelium				Botulinum Toxin Type A (Gtpase activity)	(M153)PID P75 NTR PATHWAY; (M124)PID CXCR4 PATHWAY	(M5941)HALLMARK UV RESPONSE UP; (M5902)HALLMARK APOPTOSIS; (M5947)HALLMARK IL2 STAT5 SIGNALING	1	1	1	0	0	1	0	0	0	0	0	0	1	0	0	0	1	1	0	1	2
143888	KDELC2	1	1	143888	Gene_ID	H. sapiens	143888	H. sapiens	POGLUT3	protein O-glucosyltransferase 3	GO:0018242 protein O-linked glycosylation via serine;GO:0006493 protein O-linked glycosylation;GO:0006486 protein glycosylation			Nucleoplasm(Supported)Vesicles(Approved)				0	0	0	0	0	0	0	0	0	0	0	0	0	0	0	0	0	0	0	0	2
4147	MATN2	1	1	4147	Gene_ID	H. sapiens	4147	H. sapiens	MATN2	matrilin 2	GO:0003429 growth plate cartilage chondrocyte morphogenesis;GO:0003414 chondrocyte morphogenesis involved in endochondral bone morphogenesis;GO:0031104 dendrite regeneration					(M3008)NABA ECM GLYCOPROTEINS; (M5884)NABA CORE MATRISOME; (M5889)NABA MATRISOME	(M5930)HALLMARK EPITHELIAL MESENCHYMAL TRANSITION	0	0	0	0	0	0	0	0	0	0	0	0	0	0	0	0	0	0	0	1	2
127933	UHMK1	1	1	127933	Gene_ID	H. sapiens	127933	H. sapiens	UHMK1	U2AF homology motif kinase 1	GO:0046825 regulation of protein export from nucleus;GO:0045948 positive regulation of translational initiation;GO:0006446 regulation of translational initiation	Other	Enzymes/{ENZYME proteins/Transferases,Kinases}	Nucleoplasm(Supported)Golgi apparatus(Approved)				0	0	1	0	0	0	0	0	0	0	0	0	0	0	0	0	0	0	0	0	2
79682	CENPU	1	1	79682	Gene_ID	H. sapiens	79682	H. sapiens	CENPU	centromere protein U	GO:0034080 CENP-A containing nucleosome assembly;GO:0006336 DNA replication-independent nucleosome assembly;GO:0031055 chromatin remodeling at centromere			Microtubule organizing center;Nucleus(Supported)		(M129)PID PLK1 PATHWAY		1	0	0	0	1	0	1	0	0	0	0	0	0	1	0	0	0	0	0	0	2
1373	CPS1	1	1	1373	Gene_ID	H. sapiens	1373	H. sapiens	CPS1	carbamoyl-phosphate synthase 1	GO:0070409 carbamoyl phosphate biosynthetic process;GO:1903718 cellular response to ammonia;GO:0071400 cellular response to oleic acid		Enzymes/ENZYME proteins/Ligase	Nucleoli(Approved)	Carglumic Acid (Phospholipid binding)			0	0	0	0	0	1	0	0	0	0	0	0	0	0	0	0	0	0	0	0	2
102465524	MIR6869	1	1	102465524	Gene_ID	H. sapiens	102465524	H. sapiens	MIR6869	microRNA 6869	GO:1904468 negative regulation of tumor necrosis factor secretion;GO:1900165 negative regulation of interleukin-6 secretion;GO:1904467 regulation of tumor necrosis factor secretion							0	0	0	0	0	0	0	0	0	0	0	0	0	0	0	0	0	0	0	0	2
101928583	LOC101928583	1	1	101928583	Gene_ID	H. sapiens	101928583	H. sapiens	SLC7A14-AS1	SLC7A14 antisense RNA 1								0	0	0	0	0	0	0	0	0	0	0	0	0	0	0	0	0	0	0	0	2
2590	GALNT2	1	1	2590	Gene_ID	H. sapiens	2590	H. sapiens	GALNT2	polypeptide N-acetylgalactosaminyltransferase 2	GO:0018243 protein O-linked glycosylation via threonine;GO:0002378 immunoglobulin biosynthetic process;GO:0018242 protein O-linked glycosylation via serine		Enzymes/ENZYME proteins/Transferases	Golgi apparatus(Enhanced)				0	0	0	0	0	0	0	0	0	0	0	0	0	0	0	0	0	0	0	0	2
54478	FAM64A	1	1	54478	Gene_ID	H. sapiens	54478	H. sapiens	PIMREG	PICALM interacting mitotic regulator	GO:0051301 cell division;GO:0007049 cell cycle;GO:0009987 cellular process			Nucleus(Enhanced)				0	1	0	0	0	0	0	0	0	0	0	0	0	0	0	0	0	0	0	0	2
7846	TUBA1A	1	1	7846	Gene_ID	H. sapiens	7846	H. sapiens	TUBA1A	tubulin alpha 1a	GO:0097711 ciliary basal body-plasma membrane docking;GO:0010389 regulation of G2/M transition of mitotic cell cycle;GO:1902749 regulation of cell cycle G2/M phase transition			Microtubules(Enhanced)	Albendazole (Structural molecule activity);Vinblastine (Structural molecule activity);Mebendazole (Structural molecule activity);Epothilone D (Structural molecule activity);Epothilone B (Structural molecule activity);CYT997 (Structural molecule activity);2-MERCAPTO-N-[1,2,3,10-TETRAMETHOXY-9-OXO-5,6,7,9-TETRAHYDRO-BENZO[A]HEPTALEN-7-YL]ACETAMIDE (Structural molecule activity)	(M2579)ST DIFFERENTIATION PATHWAY IN PC12 CELLS; (M19)PID P73PATHWAY		1	1	1	0	0	0	0	0	0	0	0	1	0	0	0	0	0	1	0	0	2
1490	CTGF	1	1	1490	Gene_ID	H. sapiens	1490	H. sapiens	CCN2	cellular communication network factor 2	GO:0060452 positive regulation of cardiac muscle contraction;GO:0070318 positive regulation of G0 to G1 transition;GO:0051496 positive regulation of stress fiber assembly					(M159)PID AMB2 NEUTROPHILS PATHWAY; (M286)PID TGFBR PATHWAY; (M3008)NABA ECM GLYCOPROTEINS	(M5891)HALLMARK HYPOXIA; (M5930)HALLMARK EPITHELIAL MESENCHYMAL TRANSITION	0	0	1	0	0	1	0	0	0	1	1	0	1	0	0	0	0	0	0	0	2
81	ACTN4	1	1	81	Gene_ID	H. sapiens	81	H. sapiens	ACTN4	actinin alpha 4	GO:0032417 positive regulation of sodium:proton antiporter activity;GO:0032415 regulation of sodium:proton antiporter activity;GO:2000651 positive regulation of sodium ion transmembrane transporter activity			Cytosol;Nuclear bodies(Approved)		(M186)PID PDGFRB PATHWAY	(M5893)HALLMARK MITOTIC SPINDLE; (M5915)HALLMARK APICAL JUNCTION	0	0	0	0	0	1	0	0	0	0	0	0	1	0	1	0	0	1	1	1	2
84848	MIR503HG	1	1	84848	Gene_ID	H. sapiens	84848	H. sapiens	MIR503HG	MIR503 host gene								0	0	0	0	0	0	0	0	0	0	0	0	0	0	0	0	0	0	0	0	2
84617	TUBB6	1	1	84617	Gene_ID	H. sapiens	84617	H. sapiens	TUBB6	tubulin beta 6 class V	GO:0000226 microtubule cytoskeleton organization;GO:0007017 microtubule-based process;GO:0000278 mitotic cell cycle				CYT997 (Structural constituent of cytoskeleton)			1	1	0	0	0	0	0	0	0	0	0	1	0	0	0	0	0	1	0	0	2
9493	KIF23	1	1	9493	Gene_ID	H. sapiens	9493	H. sapiens	KIF23	kinesin family member 23	GO:0072383 plus-end-directed vesicle transport along microtubule;GO:0051256 mitotic spindle midzone assembly;GO:0072386 plus-end-directed organelle transport along microtubule			Nucleoplasm(Enhanced)		(M14)PID AURORA B PATHWAY	(M5893)HALLMARK MITOTIC SPINDLE; (M5901)HALLMARK G2M CHECKPOINT	1	1	1	0	0	1	0	0	1	0	1	0	0	1	0	0	1	1	0	0	2
22974	TPX2	1	1	22974	Gene_ID	H. sapiens	22974	H. sapiens	TPX2	TPX2 microtubule nucleation factor	GO:0007026 negative regulation of microtubule depolymerization;GO:0031114 regulation of microtubule depolymerization;GO:0060236 regulation of mitotic spindle organization			Cytokinetic bridge;Microtubule organizing center;Mitotic spindle;Nucleoplasm(Enhanced)		(M242)PID AURORA A PATHWAY; (M129)PID PLK1 PATHWAY; (M8873)ST FAS SIGNALING PATHWAY	(M5893)HALLMARK MITOTIC SPINDLE; (M5901)HALLMARK G2M CHECKPOINT	1	1	1	0	0	1	1	0	0	0	0	1	0	0	1	0	0	0	0	0	2
8507	ENC1	1	1	8507	Gene_ID	H. sapiens	8507	H. sapiens	ENC1	ectodermal-neural cortex 1	GO:0010499 proteasomal ubiquitin-independent protein catabolic process;GO:0010976 positive regulation of neuron projection development;GO:0017148 negative regulation of translation			Plasma membrane(Uncertain)				0	0	0	0	0	0	0	0	0	0	0	0	0	0	0	0	0	0	0	1	2
1173	AP2M1	1	1	1173	Gene_ID	H. sapiens	1173	H. sapiens	AP2M1	adaptor related protein complex 2 subunit mu 1	GO:0097494 regulation of vesicle size;GO:1903077 negative regulation of protein localization to plasma membrane;GO:0032802 low-density lipoprotein particle receptor catabolic process			Plasma membrane(Supported)		(M243)PID ARF 3PATHWAY	(M5910)HALLMARK PROTEIN SECRETION; (M5923)HALLMARK PI3K AKT MTOR SIGNALING	0	0	0	0	0	1	0	0	0	0	0	0	0	0	0	0	0	0	0	0	2
9585	KIF20B	1	1	9585	Gene_ID	H. sapiens	9585	H. sapiens	KIF20B	kinesin family member 20B	GO:1903438 positive regulation of mitotic cytokinetic process;GO:1903490 positive regulation of mitotic cytokinesis;GO:1903436 regulation of mitotic cytokinetic process						(M5893)HALLMARK MITOTIC SPINDLE; (M5901)HALLMARK G2M CHECKPOINT	0	1	1	0	0	0	0	1	0	0	1	0	1	0	0	0	1	1	0	1	2
51474	LIMA1	1	1	51474	Gene_ID	H. sapiens	51474	H. sapiens	LIMA1	LIM domain and actin binding 1	GO:0030299 intestinal cholesterol absorption;GO:0030835 negative regulation of actin filament depolymerization;GO:0098856 intestinal lipid absorption			Actin filaments;Cytosol;Focal adhesion sites;Plasma membrane(Enhanced)		(M232)PID ECADHERIN STABILIZATION PATHWAY	(M5915)HALLMARK APICAL JUNCTION	0	0	0	0	0	1	0	0	0	0	0	0	0	0	1	0	0	0	0	0	2
115265	DDIT4L	1	1	115265	Gene_ID	H. sapiens	115265	H. sapiens	DDIT4L	DNA damage inducible transcript 4 like	GO:0009968 negative regulation of signal transduction;GO:0010648 negative regulation of cell communication;GO:0023057 negative regulation of signaling			Actin filaments;Nucleoplasm;Plasma membrane(Uncertain)				0	0	0	0	0	0	0	0	0	0	0	0	0	0	0	0	0	0	0	0	2
7169	TPM2	1	1	7169	Gene_ID	H. sapiens	7169	H. sapiens	TPM2	tropomyosin 2	GO:0030049 muscle filament sliding;GO:0033275 actin-myosin filament sliding;GO:0070252 actin-mediated cell contraction						(M5909)HALLMARK MYOGENESIS; (M5930)HALLMARK EPITHELIAL MESENCHYMAL TRANSITION	0	0	0	0	0	1	0	0	0	0	0	0	0	0	0	0	0	0	0	0	2
9168	TMSB10	1	1	9168	Gene_ID	H. sapiens	9168	H. sapiens	TMSB10	thymosin beta 10	GO:0042989 sequestering of actin monomers;GO:0030837 negative regulation of actin filament polymerization;GO:0032272 negative regulation of protein polymerization							0	0	0	0	0	1	0	0	0	0	0	0	0	0	1	0	0	0	0	0	2
55872	PBK	1	1	55872	Gene_ID	H. sapiens	55872	H. sapiens	PBK	PDZ binding kinase	GO:0032435 negative regulation of proteasomal ubiquitin-dependent protein catabolic process;GO:2000059 negative regulation of ubiquitin-dependent protein catabolic process;GO:1901799 negative regulation of proteasomal protein catabolic process	STE Ser/Thr protein kinase family	Enzymes/{ENZYME proteins/Transferases,Kinases/STE Ser/Thr protein kinases}	Cytosol(Approved)			(M5901)HALLMARK G2M CHECKPOINT	0	0	0	0	0	0	0	0	0	1	0	0	0	0	0	0	0	0	0	0	2
79627	OGFRL1	1	1	79627	Gene_ID	H. sapiens	79627	H. sapiens	OGFRL1	opioid growth factor receptor like 1	GO:0038003 opioid receptor signaling pathway;GO:0007186 G protein-coupled receptor signaling pathway;GO:0007165 signal transduction			Golgi apparatus;Nucleoplasm(Approved)				0	0	0	0	0	0	0	0	0	0	0	0	0	0	0	0	0	0	0	0	2
24137	KIF4A	1	1	24137	Gene_ID	H. sapiens	24137	H. sapiens	KIF4A	kinesin family member 4A	GO:0051256 mitotic spindle midzone assembly;GO:0008089 anterograde axonal transport;GO:0051255 spindle midzone assembly			Cytokinetic bridge;Nucleoplasm(Enhanced)			(M5893)HALLMARK MITOTIC SPINDLE; (M5925)HALLMARK E2F TARGETS; (M5901)HALLMARK G2M CHECKPOINT	0	1	0	0	0	0	0	0	1	0	0	0	0	0	0	0	1	1	0	0	2
9510	ADAMTS1	1	1	9510	Gene_ID	H. sapiens	9510	H. sapiens	ADAMTS1	ADAM metallopeptidase with thrombospondin type 1 motif 1	GO:1904754 positive regulation of vascular associated smooth muscle cell migration;GO:0001542 ovulation from ovarian follicle;GO:1904752 regulation of vascular associated smooth muscle cell migration					(M3468)NABA ECM REGULATORS; (M5885)NABA MATRISOME ASSOCIATED; (M5889)NABA MATRISOME	(M5908)HALLMARK ANDROGEN RESPONSE	0	0	1	0	0	0	0	0	0	0	1	0	1	0	0	0	0	0	0	0	2
143686	SESN3	1	1	143686	Gene_ID	H. sapiens	143686	H. sapiens	SESN3	sestrin 3	GO:1990253 cellular response to leucine starvation;GO:0071233 cellular response to leucine;GO:0046626 regulation of insulin receptor signaling pathway			Cytosol;Nucleoplasm(Approved)				0	0	0	0	0	0	0	0	0	0	0	0	0	0	0	0	0	0	0	0	2
90355	C5orf30	1	1	90355	Gene_ID	H. sapiens	90355	H. sapiens	MACIR	macrophage immunometabolism regulator	GO:0010764 negative regulation of fibroblast migration;GO:1900016 negative regulation of cytokine production involved in inflammatory response;GO:0010762 regulation of fibroblast migration							0	0	0	0	0	0	0	0	0	0	0	1	1	0	0	0	0	0	0	0	2
401541	CENPP	1	1	401541	Gene_ID	H. sapiens	401541	H. sapiens	CENPP	centromere protein P	GO:0034080 CENP-A containing nucleosome assembly;GO:0006336 DNA replication-independent nucleosome assembly;GO:0031055 chromatin remodeling at centromere			Nucleus(Supported)Nucleoli(Approved)				1	0	0	0	1	0	0	0	0	0	0	0	0	1	0	0	0	0	0	0	2
90417	KNSTRN	1	1	90417	Gene_ID	H. sapiens	90417	H. sapiens	KNSTRN	kinetochore localized astrin (SPAG5) binding protein	GO:0051988 regulation of attachment of spindle microtubules to kinetochore;GO:0008608 attachment of spindle microtubules to kinetochore;GO:0000070 mitotic sister chromatid segregation			Microtubules;Mitotic spindle(Supported)Cytosol(Approved)				0	1	1	0	0	0	0	1	0	0	0	0	0	0	0	0	0	0	0	0	2
22854	NTNG1	1	1	22854	Gene_ID	H. sapiens	22854	H. sapiens	NTNG1	netrin G1	GO:0099560 synaptic membrane adhesion;GO:0007409 axonogenesis;GO:0061564 axon development			Plasma membrane(Supported)		(M5887)NABA BASEMENT MEMBRANES; (M3008)NABA ECM GLYCOPROTEINS; (M5884)NABA CORE MATRISOME	(M5916)HALLMARK APICAL SURFACE	0	0	0	0	0	0	0	0	0	0	0	0	0	0	0	0	0	0	0	1	2
64359	NXN	1	1	64359	Gene_ID	H. sapiens	64359	H. sapiens	NXN	nucleoredoxin	GO:0031397 negative regulation of protein ubiquitination;GO:1903321 negative regulation of protein modification by small protein conjugation or removal;GO:0098869 cellular oxidant detoxification		Enzymes/ENZYME proteins/Oxidoreductases	Cytosol;Golgi apparatus(Supported)				0	0	0	0	0	0	0	0	0	0	0	0	0	0	0	0	0	0	0	0	2
5362	PLXNA2	1	1	5362	Gene_ID	H. sapiens	5362	H. sapiens	PLXNA2	plexin A2	GO:0021935 cerebellar granule cell precursor tangential migration;GO:0021934 hindbrain tangential cell migration;GO:1902287 semaphorin-plexin signaling pathway involved in axon guidance					(M5880)NABA ECM AFFILIATED; (M5885)NABA MATRISOME ASSOCIATED; (M5889)NABA MATRISOME		0	0	0	0	0	0	0	0	0	0	0	0	0	0	0	0	0	0	1	1	2
7832	BTG2	1	1	7832	Gene_ID	H. sapiens	7832	H. sapiens	BTG2	BTG anti-proliferation factor 2	GO:0006977 DNA damage response, signal transduction by p53 class mediator resulting in cell cycle arrest;GO:0060213 positive regulation of nuclear-transcribed mRNA poly(A) tail shortening;GO:0072431 signal transduction involved in mitotic G1 DNA damage checkpoint			Nucleoplasm;Vesicles(Approved)		(M145)PID P53 DOWNSTREAM PATHWAY	(M5941)HALLMARK UV RESPONSE UP; (M5902)HALLMARK APOPTOSIS; (M5956)HALLMARK KRAS SIGNALING DN	0	0	1	0	1	0	0	0	0	0	1	0	0	0	0	0	0	0	0	0	2
203068	TUBB	1	1	203068	Gene_ID	H. sapiens	203068	H. sapiens	TUBB	tubulin beta class I	GO:0097711 ciliary basal body-plasma membrane docking;GO:0042267 natural killer cell mediated cytotoxicity;GO:0043312 neutrophil degranulation			Microtubules(Supported)	Vinorelbine (Ubiquitin protein ligase binding);Vincristine (Ubiquitin protein ligase binding);Vinblastine (Ubiquitin protein ligase binding);Podofilox (Ubiquitin protein ligase binding);Colchicine (Ubiquitin protein ligase binding);Epothilone D (Ubiquitin protein ligase binding);Epothilone B (Ubiquitin protein ligase binding);CYT997 (Ubiquitin protein ligase binding);CA4P (Ubiquitin protein ligas…		(M5925)HALLMARK E2F TARGETS	1	1	1	0	0	0	0	0	0	0	0	1	0	0	0	0	0	0	0	0	2
5836	PYGL	1	1	5836	Gene_ID	H. sapiens	5836	H. sapiens	PYGL	glycogen phosphorylase L	GO:0006015 5-phosphoribose 1-diphosphate biosynthetic process;GO:0005980 glycogen catabolic process;GO:0046391 5-phosphoribose 1-diphosphate metabolic process		Enzymes/ENZYME proteins/Transferases	Cytosol;Plasma membrane(Supported)	Pyridoxal Phosphate (Vitamin binding);Adenosine monophosphate (Vitamin binding);CP-526423 (Vitamin binding);1-N-Acetyl-Beta-D-Glucosamine (Vitamin binding);Beta-D-Glucose (Vitamin binding);5-Chloro-1h-Indole-2-Carboxylic Acid{[Cyclopentyl-(2-Hydroxy-Ethyl)-Carbamoyl]-Methyl}-Amide (Vitamin binding);Cp403700, (S)-1-{2-[(5-Chloro-1h-Indole-2-Carbonyl)-Amino]-3-Phenyl-Propionyl}-Azetidine-3-Carboxyl…		(M5937)HALLMARK GLYCOLYSIS	0	0	0	0	0	0	0	0	0	0	0	0	0	0	0	0	0	0	0	0	2
3487	IGFBP4	1	1	3487	Gene_ID	H. sapiens	3487	H. sapiens	IGFBP4	insulin like growth factor binding protein 4	GO:0043568 positive regulation of insulin-like growth factor receptor signaling pathway;GO:0043567 regulation of insulin-like growth factor receptor signaling pathway;GO:0044342 type B pancreatic cell proliferation					(M77)PID WNT SIGNALING PATHWAY; (M3008)NABA ECM GLYCOPROTEINS; (M5884)NABA CORE MATRISOME	(M5906)HALLMARK ESTROGEN RESPONSE EARLY; (M5930)HALLMARK EPITHELIAL MESENCHYMAL TRANSITION; (M5907)HALLMARK ESTROGEN RESPONSE LATE	0	0	0	0	0	0	0	0	0	0	0	0	1	0	0	0	0	0	0	0	2
7499	XG	1	1	7499	Gene_ID	H. sapiens	7499	H. sapiens	XG	Xg glycoprotein (Xg blood group)	GO:2000391 positive regulation of neutrophil extravasation;GO:2000389 regulation of neutrophil extravasation;GO:1902624 positive regulation of neutrophil migration		Blood group antigen proteins					0	0	0	0	0	0	0	0	0	0	0	0	1	0	0	0	0	0	0	0	2
5673	PSG5	1	1	5673	Gene_ID	H. sapiens	5673	H. sapiens	PSG5	pregnancy specific beta-1-glycoprotein 5	GO:0007565 female pregnancy;GO:0044706 multi-multicellular organism process;GO:0044703 multi-organism reproductive process							0	0	0	0	0	0	0	0	0	0	0	0	0	0	0	0	0	1	0	0	2
10635	RAD51AP1	1	1	10635	Gene_ID	H. sapiens	10635	H. sapiens	RAD51AP1	RAD51 associated protein 1	GO:0010569 regulation of double-strand break repair via homologous recombination;GO:2000779 regulation of double-strand break repair;GO:0071479 cellular response to ionizing radiation			Nucleus(Approved)			(M5925)HALLMARK E2F TARGETS	0	0	0	0	1	0	0	0	0	1	0	0	0	0	0	0	0	0	0	0	2
2521	FUS	1	1	2521	Gene_ID	H. sapiens	2521	H. sapiens	FUS	FUS RNA binding protein	GO:1905168 positive regulation of double-strand break repair via homologous recombination;GO:0048255 mRNA stabilization;GO:2000781 positive regulation of double-strand break repair			Nucleoplasm(Enhanced)			(M5922)HALLMARK UNFOLDED PROTEIN RESPONSE	0	0	0	0	1	0	0	0	0	1	0	0	0	0	0	0	0	0	0	0	2
65266	WNK4	1	1	65266	Gene_ID	H. sapiens	65266	H. sapiens	WNK4	WNK lysine deficient protein kinase 4	GO:0072156 distal tubule morphogenesis;GO:1903288 positive regulation of potassium ion import;GO:0090188 negative regulation of pancreatic juice secretion	Other	Enzymes/{ENZYME proteins/Transferases,Kinases}				(M5915)HALLMARK APICAL JUNCTION	0	0	0	0	0	0	0	0	0	0	0	0	0	0	0	0	0	0	0	0	2
55010	PARPBP	1	1	55010	Gene_ID	H. sapiens	55010	H. sapiens	PARPBP	PARP1 binding protein	GO:2000042 negative regulation of double-strand break repair via homologous recombination;GO:2000780 negative regulation of double-strand break repair;GO:0010569 regulation of double-strand break repair via homologous recombination			Nucleoplasm(Supported)				0	0	0	0	1	0	0	0	0	1	0	0	0	0	0	0	0	0	0	0	2
1164	CKS2	1	1	1164	Gene_ID	H. sapiens	1164	H. sapiens	CKS2	CDC28 protein kinase regulatory subunit 2	GO:0045737 positive regulation of cyclin-dependent protein serine/threonine kinase activity;GO:1904031 positive regulation of cyclin-dependent protein kinase activity;GO:0000079 regulation of cyclin-dependent protein serine/threonine kinase activity			Cytosol;Mitochondria;Nucleus;Vesicles(Approved)			(M5925)HALLMARK E2F TARGETS; (M5901)HALLMARK G2M CHECKPOINT	0	1	1	0	0	0	0	0	0	0	1	0	0	0	0	1	0	0	0	0	2
64393	ZMAT3	1	1	64393	Gene_ID	H. sapiens	64393	H. sapiens	ZMAT3	zinc finger matrin-type 3	GO:0043065 positive regulation of apoptotic process;GO:0043068 positive regulation of programmed cell death;GO:0010942 positive regulation of cell death			Nucleoplasm(Supported)			(M5939)HALLMARK P53 PATHWAY	0	0	0	0	0	0	0	0	0	0	0	0	0	0	0	0	0	0	0	0	2
221150	SKA3	1	1	221150	Gene_ID	H. sapiens	221150	H. sapiens	SKA3	spindle and kinetochore associated complex subunit 3	GO:0031110 regulation of microtubule polymerization or depolymerization;GO:0031109 microtubule polymerization or depolymerization;GO:0070507 regulation of microtubule cytoskeleton organization			Cytosol;Plasma membrane(Uncertain)				0	1	0	0	0	1	0	0	0	0	0	0	0	0	0	0	0	0	0	0	2
27250	PDCD4	1	1	27250	Gene_ID	H. sapiens	27250	H. sapiens	PDCD4	programmed cell death 4	GO:0060940 epithelial to mesenchymal transition involved in cardiac fibroblast development;GO:0060939 epicardium-derived cardiac fibroblast cell development;GO:1905461 positive regulation of vascular associated smooth muscle cell apoptotic process			Nucleoplasm(Approved)		(M121)PID MTOR 4PATHWAY	(M5902)HALLMARK APOPTOSIS; (M5905)HALLMARK ADIPOGENESIS; (M5907)HALLMARK ESTROGEN RESPONSE LATE	0	0	1	0	0	0	0	0	0	1	0	0	1	0	0	0	0	0	0	0	2
7112	TMPO	1	1	7112	Gene_ID	H. sapiens	7112	H. sapiens	TMPO	thymopoietin	GO:0006355 regulation of transcription, DNA-templated;GO:1903506 regulation of nucleic acid-templated transcription;GO:0006351 transcription, DNA-templated			Nuclear membrane(Enhanced)			(M5925)HALLMARK E2F TARGETS; (M5901)HALLMARK G2M CHECKPOINT	1	0	0	0	0	0	0	0	0	0	0	0	0	0	0	0	0	0	0	0	2
91614	DEPDC7	1	1	91614	Gene_ID	H. sapiens	91614	H. sapiens	DEPDC7	DEP domain containing 7	GO:0051056 regulation of small GTPase mediated signal transduction;GO:0007264 small GTPase mediated signal transduction;GO:1902531 regulation of intracellular signal transduction			Cytosol;Nucleoli;Nucleus(Approved)				1	0	0	0	0	0	0	0	0	0	0	0	0	0	0	0	0	0	0	0	2
8076	MFAP5	1	1	8076	Gene_ID	H. sapiens	8076	H. sapiens	MFAP5	microfibril associated protein 5	GO:0060216 definitive hemopoiesis;GO:0030198 extracellular matrix organization;GO:0043062 extracellular structure organization					(M17)PID NOTCH PATHWAY; (M3008)NABA ECM GLYCOPROTEINS; (M5884)NABA CORE MATRISOME	(M5930)HALLMARK EPITHELIAL MESENCHYMAL TRANSITION	0	0	0	0	0	1	0	0	0	0	0	0	0	0	0	0	0	0	0	0	2
309	ANXA6	1	1	309	Gene_ID	H. sapiens	309	H. sapiens	ANXA6	annexin A6	GO:0003418 growth plate cartilage chondrocyte differentiation;GO:0003413 chondrocyte differentiation involved in endochondral bone morphogenesis;GO:0003417 growth plate cartilage development		Transporters/Transporter channels and pores			(M5880)NABA ECM AFFILIATED; (M5885)NABA MATRISOME ASSOCIATED; (M5889)NABA MATRISOME		0	0	0	0	0	0	0	0	0	0	0	0	1	0	0	0	0	0	0	0	2
5999	RGS4	1	1	5999	Gene_ID	H. sapiens	5999	H. sapiens	RGS4	regulator of G protein signaling 4	GO:1900924 negative regulation of glycine import across plasma membrane;GO:1900923 regulation of glycine import across plasma membrane;GO:0061052 negative regulation of cell growth involved in cardiac muscle cell development			Intermediate filaments(Approved)			(M5942)HALLMARK UV RESPONSE DN; (M5930)HALLMARK EPITHELIAL MESENCHYMAL TRANSITION	0	0	0	0	0	1	0	0	0	0	0	0	0	0	0	0	0	0	0	0	2
8710	SERPINB7	1	1	8710	Gene_ID	H. sapiens	8710	H. sapiens	SERPINB7	serpin family B member 7	GO:0072126 positive regulation of glomerular mesangial cell proliferation;GO:0072124 regulation of glomerular mesangial cell proliferation;GO:0072110 glomerular mesangial cell proliferation			Endoplasmic reticulum;Mitochondria(Approved)		(M3468)NABA ECM REGULATORS; (M5885)NABA MATRISOME ASSOCIATED; (M5889)NABA MATRISOME		0	0	0	0	0	0	0	0	0	0	0	0	1	0	0	0	0	0	0	0	2
64115	C10orf54	1	1	64115	Gene_ID	H. sapiens	64115	H. sapiens	VSIR	V-set immunoregulatory receptor	GO:2000565 negative regulation of CD8-positive, alpha-beta T cell proliferation;GO:2000562 negative regulation of CD4-positive, alpha-beta T cell proliferation;GO:2001186 negative regulation of CD8-positive, alpha-beta T cell activation			Nucleoplasm(Approved)				0	0	0	0	0	0	0	0	0	0	0	0	1	0	0	0	0	0	1	0	2
2195	FAT1	1	1	2195	Gene_ID	H. sapiens	2195	H. sapiens	FAT1	FAT atypical cadherin 1	GO:0045197 establishment or maintenance of epithelial cell apical/basal polarity;GO:0003382 epithelial cell morphogenesis;GO:0048593 camera-type eye morphogenesis							0	0	0	0	0	1	0	0	0	0	0	0	0	0	0	0	0	0	0	1	2
57082	KNL1	1	1	57082	Gene_ID	H. sapiens	57082	H. sapiens	KNL1	kinetochore scaffold 1	GO:0001675 acrosome assembly;GO:0034080 CENP-A containing nucleosome assembly;GO:0034501 protein localization to kinetochore			Nuclear bodies;Nucleoplasm(Enhanced)			(M5901)HALLMARK G2M CHECKPOINT	1	1	0	0	1	0	0	0	0	0	0	0	0	1	0	0	0	0	0	0	2
27063	ANKRD1	1	1	27063	Gene_ID	H. sapiens	27063	H. sapiens	ANKRD1	ankyrin repeat domain 1	GO:0043517 positive regulation of DNA damage response, signal transduction by p53 class mediator;GO:1901798 positive regulation of signal transduction by p53 class mediator;GO:0045214 sarcomere organization			Nucleoli fibrillar center;Nucleus(Supported)				0	0	1	0	0	1	0	0	0	1	0	0	0	0	0	0	0	0	0	1	2
55568	GALNT10	1	1	55568	Gene_ID	H. sapiens	55568	H. sapiens	GALNT10	polypeptide N-acetylgalactosaminyltransferase 10	GO:0016266 O-glycan processing;GO:0006493 protein O-linked glycosylation;GO:0006486 protein glycosylation		Enzymes/ENZYME proteins/Transferases	Golgi apparatus;Nucleoplasm;Plasma membrane(Approved)				0	0	0	0	0	0	0	0	0	0	0	0	0	0	0	0	0	0	0	0	2
84515	MCM8	1	1	84515	Gene_ID	H. sapiens	84515	H. sapiens	MCM8	minichromosome maintenance 8 homologous recombination repair factor	GO:0036298 recombinational interstrand cross-link repair;GO:0071168 protein localization to chromatin;GO:0036297 interstrand cross-link repair		Enzymes/ENZYME proteins/Hydrolases	Nucleoplasm(Supported)				1	0	1	1	1	0	0	0	0	0	0	0	0	0	0	0	0	0	0	0	2
55357	TBC1D2	1	1	55357	Gene_ID	H. sapiens	55357	H. sapiens	TBC1D2	TBC1 domain family member 2	GO:1902017 regulation of cilium assembly;GO:0090630 activation of GTPase activity;GO:0120032 regulation of plasma membrane bounded cell projection assembly			Cytosol;Nucleus(Approved)				0	0	0	0	0	0	0	0	0	0	0	1	0	0	0	0	0	0	0	1	2
1728	NQO1	1	1	1728	Gene_ID	H. sapiens	1728	H. sapiens	NQO1	NAD(P)H quinone dehydrogenase 1	GO:0019430 removal of superoxide radicals;GO:1904880 response to hydrogen sulfide;GO:0071451 cellular response to superoxide		Enzymes/ENZYME proteins/Oxidoreductases	Cytosol(Enhanced)	Menadione (Superoxide dismutase activity);Dicoumarol (Superoxide dismutase activity);Duroquinone (Superoxide dismutase activity);3-Hydroxymethyl-5-Aziridinyl-1methyl-2-[1h-Indole-4,7-Dione]-Propanol (Superoxide dismutase activity);5-Methoxy-1,2-Dimethyl-3-(4-Nitrophenoxymethyl)Indole-4,7-Dione (Superoxide dismutase activity);Cibacron Blue (Superoxide dismutase activity);Flavin adenine dinucleotid…	(M256)PID TAP63 PATHWAY	(M5938)HALLMARK REACTIVE OXIGEN SPECIES PATHWAY; (M5909)HALLMARK MYOGENESIS; (M5934)HALLMARK XENOBIOTIC METABOLISM	0	0	0	0	0	0	0	0	0	0	0	0	0	0	0	0	0	0	0	0	2
23310	NCAPD3	1	1	23310	Gene_ID	H. sapiens	23310	H. sapiens	NCAPD3	non-SMC condensin II complex subunit D3	GO:0010032 meiotic chromosome condensation;GO:0007076 mitotic chromosome condensation;GO:0030261 chromosome condensation			Nucleoplasm(Supported)				1	1	0	0	1	0	0	1	1	0	0	0	0	1	0	1	0	0	0	0	2
84570	COL25A1	1	1	84570	Gene_ID	H. sapiens	84570	H. sapiens	COL25A1	collagen type XXV alpha 1 chain	GO:0060385 axonogenesis involved in innervation;GO:0060384 innervation;GO:0021675 nerve development			Cytosol;Endoplasmic reticulum;Vesicles(Approved)		(M3005)NABA COLLAGENS; (M5884)NABA CORE MATRISOME; (M5889)NABA MATRISOME		0	0	0	0	0	0	0	0	0	0	0	0	0	0	0	0	0	0	0	1	2
29766	TMOD3	1	1	29766	Gene_ID	H. sapiens	29766	H. sapiens	TMOD3	tropomodulin 3	GO:0051694 pointed-end actin filament capping;GO:0051693 actin filament capping;GO:0030835 negative regulation of actin filament depolymerization			Actin filaments;Cytosol(Approved)				0	0	1	0	0	1	0	0	0	0	1	0	0	0	1	0	0	0	0	0	2
387882	C12orf75	1	1	387882	Gene_ID	H. sapiens	387882	H. sapiens	C12orf75	chromosome 12 open reading frame 75				Vesicles(Approved)				0	0	0	0	0	0	0	0	0	0	0	0	0	0	0	0	0	0	0	0	2
1266	CNN3	1	1	1266	Gene_ID	H. sapiens	1266	H. sapiens	CNN3	calponin 3	GO:0032780 negative regulation of ATPase activity;GO:0043462 regulation of ATPase activity;GO:0031032 actomyosin structure organization			Actin filaments;Cytosol(Enhanced)			(M5909)HALLMARK MYOGENESIS	0	0	0	0	0	1	0	0	0	0	0	0	0	0	0	0	0	0	0	0	2
131578	LRRC15	1	1	131578	Gene_ID	H. sapiens	131578	H. sapiens	LRRC15	leucine rich repeat containing 15	GO:0046813 receptor-mediated virion attachment to host cell;GO:0019062 virion attachment to host cell;GO:0044650 adhesion of symbiont to host cell			Plasma membrane;Vesicles(Approved)			(M5930)HALLMARK EPITHELIAL MESENCHYMAL TRANSITION	0	0	0	0	0	0	0	0	0	0	0	0	1	0	0	0	0	0	0	0	2
2589	GALNT1	1	1	2589	Gene_ID	H. sapiens	2589	H. sapiens	GALNT1	polypeptide N-acetylgalactosaminyltransferase 1	GO:0018243 protein O-linked glycosylation via threonine;GO:0018242 protein O-linked glycosylation via serine;GO:0016266 O-glycan processing		Enzymes/ENZYME proteins/Transferases				(M5950)HALLMARK ALLOGRAFT REJECTION	0	0	0	0	0	0	0	0	0	0	0	0	0	0	0	0	0	0	0	0	2
26577	PCOLCE2	1	1	26577	Gene_ID	H. sapiens	26577	H. sapiens	PCOLCE2	procollagen C-endopeptidase enhancer 2	GO:0010952 positive regulation of peptidase activity;GO:1990830 cellular response to leukemia inhibitory factor;GO:1990823 response to leukemia inhibitory factor			Cytosol;Nucleoplasm(Approved)		(M3008)NABA ECM GLYCOPROTEINS; (M5884)NABA CORE MATRISOME; (M5889)NABA MATRISOME	(M5930)HALLMARK EPITHELIAL MESENCHYMAL TRANSITION	0	0	0	0	0	0	0	0	0	0	0	0	0	0	0	0	0	0	0	0	2
23768	FLRT2	1	1	23768	Gene_ID	H. sapiens	23768	H. sapiens	FLRT2	fibronectin leucine rich transmembrane protein 2	GO:0061343 cell adhesion involved in heart morphogenesis;GO:2001222 regulation of neuron migration;GO:0071711 basement membrane organization							0	0	0	0	0	1	0	0	0	0	0	0	0	0	0	0	0	0	0	1	2
558	AXL	1	1	558	Gene_ID	H. sapiens	558	H. sapiens	AXL	AXL receptor tyrosine kinase	GO:0032825 positive regulation of natural killer cell differentiation;GO:2000669 negative regulation of dendritic cell apoptotic process;GO:0048549 positive regulation of pinocytosis	Tyr protein kinase family	Enzymes/{ENZYME proteins/Transferases,Kinases/Tyr protein kinases}			(M236)PID DELTA NP63 PATHWAY	(M5932)HALLMARK INFLAMMATORY RESPONSE	0	0	0	0	0	0	0	0	0	0	0	0	0	0	0	0	0	0	0	1	2
101929134	LOC101929134	1	1	101929134	Gene_ID	H. sapiens	101929134	H. sapiens	PIGY-DT	PIGY divergent transcript								0	0	0	0	0	0	0	0	0	0	0	0	0	0	0	0	0	0	0	0	2
57493	HEG1	1	1	57493	Gene_ID	H. sapiens	57493	H. sapiens	HEG1	heart development protein with EGF like domains 1	GO:2000299 negative regulation of Rho-dependent protein serine/threonine kinase activity;GO:0003222 ventricular trabecula myocardium morphogenesis;GO:0090271 positive regulation of fibroblast growth factor production			Vesicles(Approved)				0	0	0	0	0	0	0	0	0	0	0	0	1	0	0	0	0	0	0	1	2
84695	LOXL3	1	1	84695	Gene_ID	H. sapiens	84695	H. sapiens	LOXL3	lysyl oxidase like 3	GO:2000329 negative regulation of T-helper 17 cell lineage commitment;GO:2000328 regulation of T-helper 17 cell lineage commitment;GO:2000320 negative regulation of T-helper 17 cell differentiation		Enzymes/ENZYME proteins/Oxidoreductases			(M3468)NABA ECM REGULATORS; (M5885)NABA MATRISOME ASSOCIATED; (M5889)NABA MATRISOME		0	0	0	0	0	1	0	0	0	0	0	0	0	0	0	0	0	0	1	0	2
10769	PLK2	1	1	10769	Gene_ID	H. sapiens	10769	H. sapiens	PLK2	polo like kinase 2	GO:0006977 DNA damage response, signal transduction by p53 class mediator resulting in cell cycle arrest;GO:0072431 signal transduction involved in mitotic G1 DNA damage checkpoint;GO:0090050 positive regulation of cell migration involved in sprouting angiogenesis	Other	Enzymes/{ENZYME proteins/Transferases,Kinases}	Cytosol;Mitochondria;Nucleoplasm(Approved)			(M5939)HALLMARK P53 PATHWAY; (M5890)HALLMARK TNFA SIGNALING VIA NFKB	0	1	1	0	0	1	0	0	0	1	1	0	1	0	1	0	1	0	0	1	2
7283	TUBG1	1	1	7283	Gene_ID	H. sapiens	7283	H. sapiens	TUBG1	tubulin gamma 1	GO:0097711 ciliary basal body-plasma membrane docking;GO:0007020 microtubule nucleation;GO:0000212 meiotic spindle organization				Vinblastine (Structural constituent of cytoskeleton)	(M129)PID PLK1 PATHWAY	(M5915)HALLMARK APICAL JUNCTION; (M5924)HALLMARK MTORC1 SIGNALING; (M5925)HALLMARK E2F TARGETS	1	1	1	0	0	1	1	0	0	0	0	1	0	0	0	1	0	0	0	0	2
3092	HIP1	1	1	3092	Gene_ID	H. sapiens	3092	H. sapiens	HIP1	huntingtin interacting protein 1	GO:2000588 positive regulation of platelet-derived growth factor receptor-beta signaling pathway;GO:0010641 positive regulation of platelet-derived growth factor receptor signaling pathway;GO:2000586 regulation of platelet-derived growth factor receptor-beta signaling pathway			Vesicles(Enhanced)		(M58)PID AR PATHWAY		0	0	0	0	0	1	0	0	0	0	0	0	0	0	0	0	0	0	0	0	2
4053	LTBP2	1	1	4053	Gene_ID	H. sapiens	4053	H. sapiens	LTBP2	latent transforming growth factor beta binding protein 2	GO:0007179 transforming growth factor beta receptor signaling pathway;GO:0071560 cellular response to transforming growth factor beta stimulus;GO:0071559 response to transforming growth factor beta			Nucleus(Approved)		(M3008)NABA ECM GLYCOPROTEINS; (M5884)NABA CORE MATRISOME; (M5889)NABA MATRISOME	(M5896)HALLMARK TGF BETA SIGNALING	0	0	0	0	0	1	0	0	0	0	0	0	0	0	0	0	0	0	0	0	2
7468	WHSC1	1	1	7468	Gene_ID	H. sapiens	7468	H. sapiens	NSD2	nuclear receptor binding SET domain protein 2	GO:0048298 positive regulation of isotype switching to IgA isotypes;GO:0048296 regulation of isotype switching to IgA isotypes;GO:0048290 isotype switching to IgA isotypes		Enzymes/ENZYME proteins/Transferases;Transcription factors/Other all-alpha-helical DNA-binding domains	Nucleus(Supported)			(M5901)HALLMARK G2M CHECKPOINT	1	0	0	1	1	0	0	0	0	1	0	0	0	0	0	0	0	0	0	0	2
5985	RFC5	1	1	5985	Gene_ID	H. sapiens	5985	H. sapiens	RFC5	replication factor C subunit 5	GO:1900264 positive regulation of DNA-directed DNA polymerase activity;GO:0032201 telomere maintenance via semi-conservative replication;GO:0070987 error-free translesion synthesis			Nucleoplasm(Approved)		(M46)PID ATR PATHWAY; (M1)PID FANCONI PATHWAY	(M5898)HALLMARK DNA REPAIR	1	0	0	1	1	0	0	0	0	1	0	0	0	1	0	0	0	0	0	0	2
5216	PFN1	1	1	5216	Gene_ID	H. sapiens	5216	H. sapiens	PFN1	profilin 1	GO:0051497 negative regulation of stress fiber assembly;GO:1900029 positive regulation of ruffle assembly;GO:0001843 neural tube closure			Cytosol(Supported)	7-HYDROXY-4-METHYL-3-(2-HYDROXY-ETHYL)COUMARIN (Proline-rich region binding)	(M16801)SIG REGULATION OF THE ACTIN CYTOSKELETON BY RHO GTPASES; (M8873)ST FAS SIGNALING PATHWAY	(M5923)HALLMARK PI3K AKT MTOR SIGNALING; (M5921)HALLMARK COMPLEMENT; (M5915)HALLMARK APICAL JUNCTION	1	0	0	0	0	1	0	0	0	0	0	0	1	0	1	0	0	1	0	1	2
647024	C6orf132	1	1	647024	Gene_ID	H. sapiens	647024	H. sapiens	C6orf132	chromosome 6 open reading frame 132				Cytosol;Golgi apparatus(Approved)				0	0	0	0	0	0	0	0	0	0	0	0	0	0	0	0	0	0	0	0	2
8836	GGH	1	1	8836	Gene_ID	H. sapiens	8836	H. sapiens	GGH	gamma-glutamyl hydrolase	GO:0046900 tetrahydrofolylpolyglutamate metabolic process;GO:0043312 neutrophil degranulation;GO:0002283 neutrophil activation involved in immune response		Enzymes/{ENZYME proteins/Hydrolases,Peptidases/Cysteine-type peptidases}				(M5941)HALLMARK UV RESPONSE UP	0	0	0	0	0	0	0	0	0	0	0	0	0	0	0	0	0	0	0	0	2
64151	NCAPG	1	1	64151	Gene_ID	H. sapiens	64151	H. sapiens	NCAPG	non-SMC condensin I complex subunit G	GO:0007076 mitotic chromosome condensation;GO:0030261 chromosome condensation;GO:0000070 mitotic sister chromatid segregation					(M14)PID AURORA B PATHWAY		1	1	0	0	1	0	0	0	1	0	0	0	0	1	0	0	0	0	0	0	2
9882	TBC1D4	1	1	9882	Gene_ID	H. sapiens	9882	H. sapiens	TBC1D4	TBC1 domain family member 4	GO:0031339 negative regulation of vesicle fusion;GO:0031338 regulation of vesicle fusion;GO:0090630 activation of GTPase activity		Transporters/Accessory Factors Involved in Transport	Cytosol(Supported)		(M247)PID INSULIN GLUCOSE PATHWAY; (M249)PID PI3KCI AKT PATHWAY		0	0	0	0	0	0	0	0	0	0	0	0	0	0	1	0	0	0	0	0	2
9568	GABBR2	1	1	9568	Gene_ID	H. sapiens	9568	H. sapiens	GABBR2	gamma-aminobutyric acid type B receptor subunit 2	GO:0007194 negative regulation of adenylate cyclase activity;GO:0031280 negative regulation of cyclase activity;GO:0051350 negative regulation of lyase activity		G-protein coupled receptors/GPCRs excl olfactory receptors;Transporters		Baclofen (G-protein coupled gaba receptor activity);SGS742 (G-protein coupled gaba receptor activity);Arbaclofen (G-protein coupled gaba receptor activity);Arbaclofen Placarbil (G-protein coupled gaba receptor activity)			0	0	0	0	0	0	0	0	0	0	0	0	0	0	0	0	0	0	0	0	2
6240	RRM1	1	1	6240	Gene_ID	H. sapiens	6240	H. sapiens	RRM1	ribonucleotide reductase catalytic subunit M1	GO:0051290 protein heterotetramerization;GO:0009263 deoxyribonucleotide biosynthetic process;GO:0021846 cell proliferation in forebrain		Enzymes/ENZYME proteins/Oxidoreductases	Cytosol(Enhanced)	Cladribine (Ribonucleoside-diphosphate reductase activity, thioredoxin disulfide as acceptor);Gemcitabine (Ribonucleoside-diphosphate reductase activity, thioredoxin disulfide as acceptor);Clofarabine (Ribonucleoside-diphosphate reductase activity, thioredoxin disulfide as acceptor);Hydroxyurea (Ribonucleoside-diphosphate reductase activity, thioredoxin disulfide as acceptor);Fludarabine (Ribonuc…	(M40)PID E2F PATHWAY	(M5926)HALLMARK MYC TARGETS V1	0	0	0	1	0	0	0	0	0	0	0	0	0	0	0	0	0	0	0	0	2
115908	CTHRC1	1	1	115908	Gene_ID	H. sapiens	115908	H. sapiens	CTHRC1	collagen triple helix repeat containing 1	GO:0090177 establishment of planar polarity involved in neural tube closure;GO:0043932 ossification involved in bone remodeling;GO:0060122 inner ear receptor cell stereocilium organization			Nucleoplasm(Approved)		(M77)PID WNT SIGNALING PATHWAY; (M23)PID WNT NONCANONICAL PATHWAY; (M3008)NABA ECM GLYCOPROTEINS	(M5930)HALLMARK EPITHELIAL MESENCHYMAL TRANSITION	0	0	0	0	0	0	0	0	0	0	0	0	0	0	0	0	0	0	0	0	2
64123	ADGRL4	1	1	64123	Gene_ID	H. sapiens	64123	H. sapiens	ADGRL4	adhesion G protein-coupled receptor L4	GO:0007189 adenylate cyclase-activating G protein-coupled receptor signaling pathway;GO:0019933 cAMP-mediated signaling;GO:0007188 adenylate cyclase-modulating G protein-coupled receptor signaling pathway		G-protein coupled receptors/{Family 2 (B) receptors,GPCRs excl olfactory receptors};Transporters				(M5953)HALLMARK KRAS SIGNALING UP	0	0	0	0	0	0	0	0	0	0	0	0	0	0	0	0	0	0	0	0	2
2247	FGF2	1	1	2247	Gene_ID	H. sapiens	2247	H. sapiens	FGF2	fibroblast growth factor 2	GO:0014843 growth factor dependent regulation of skeletal muscle satellite cell proliferation;GO:2000546 positive regulation of endothelial cell chemotaxis to fibroblast growth factor;GO:0001658 branching involved in ureteric bud morphogenesis		RAS pathway related proteins	Nuclear bodies;Nucleoplasm(Supported)	Sucralfate (Ligand-dependent nuclear receptor transcription coactivator activity);Pentosan Polysulfate (Ligand-dependent nuclear receptor transcription coactivator activity);Sirolimus (Ligand-dependent nuclear receptor transcription coactivator activity);1,4-Dideoxy-O2-Sulfo-Glucuronic Acid (Ligand-dependent nuclear receptor transcription coactivator activity);N,O6-Disulfo-Glucosamine (Ligand-dep…	(M33)PID GLYPICAN 1PATHWAY; (M165)PID SYNDECAN 4 PATHWAY; (M92)PID ANGIOPOIETIN RECEPTOR PATHWAY	(M5909)HALLMARK MYOGENESIS; (M5930)HALLMARK EPITHELIAL MESENCHYMAL TRANSITION	0	1	0	0	0	0	0	0	0	1	0	0	1	0	0	0	1	0	0	1	2
387103	CENPW	1	1	387103	Gene_ID	H. sapiens	387103	H. sapiens	CENPW	centromere protein W	GO:0034080 CENP-A containing nucleosome assembly;GO:0006336 DNA replication-independent nucleosome assembly;GO:0051382 kinetochore assembly			Nucleoplasm(Supported)				1	1	0	0	1	0	0	0	0	0	0	0	0	1	0	0	0	0	0	0	2
6567	SLC16A2	1	1	6567	Gene_ID	H. sapiens	6567	H. sapiens	SLC16A2	solute carrier family 16 member 2	GO:0070460 thyroid-stimulating hormone secretion;GO:0070327 thyroid hormone transport;GO:0006590 thyroid hormone generation		Transporters/Electrochemical Potential-driven transporters	Plasma membrane(Approved)	Pyruvic acid (Transporter activity)			0	0	0	0	0	0	0	0	0	0	0	0	0	0	0	0	0	0	0	0	2
10512	SEMA3C	1	1	10512	Gene_ID	H. sapiens	10512	H. sapiens	SEMA3C	semaphorin 3C	GO:1905312 positive regulation of cardiac neural crest cell migration involved in outflow tract morphogenesis;GO:1905310 regulation of cardiac neural crest cell migration involved in outflow tract morphogenesis;GO:0003253 cardiac neural crest cell migration involved in outflow tract morphogenesis			Cytosol;Golgi apparatus;Plasma membrane(Approved)		(M5880)NABA ECM AFFILIATED; (M5885)NABA MATRISOME ASSOCIATED; (M5889)NABA MATRISOME	(M5949)HALLMARK PEROXISOME	0	0	0	0	0	1	0	0	0	0	0	0	1	0	1	0	0	0	0	1	2
2201	FBN2	1	1	2201	Gene_ID	H. sapiens	2201	H. sapiens	FBN2	fibrillin 2	GO:0035583 sequestering of TGFbeta in extracellular matrix;GO:0035581 sequestering of extracellular ligand from receptor;GO:0060346 bone trabecula formation			Cytosol;Nucleoplasm(Approved)		(M3008)NABA ECM GLYCOPROTEINS; (M5884)NABA CORE MATRISOME; (M5889)NABA MATRISOME	(M5930)HALLMARK EPITHELIAL MESENCHYMAL TRANSITION	0	0	0	0	0	0	0	0	0	0	0	0	0	0	0	0	0	0	0	0	2
3925	STMN1	1	1	3925	Gene_ID	H. sapiens	3925	H. sapiens	STMN1	stathmin 1	GO:0051497 negative regulation of stress fiber assembly;GO:0070495 negative regulation of thrombin-activated receptor signaling pathway;GO:1905098 negative regulation of guanyl-nucleotide exchange factor activity			Cytosol(Supported)		(M209)PID P38 GAMMA DELTA PATHWAY; (M14)PID AURORA B PATHWAY	(M5937)HALLMARK GLYCOLYSIS; (M5925)HALLMARK E2F TARGETS; (M5901)HALLMARK G2M CHECKPOINT	0	1	0	0	0	1	0	0	1	0	0	0	1	0	1	0	1	0	0	1	2
2355	FOSL2	1	1	2355	Gene_ID	H. sapiens	2355	H. sapiens	FOSL2	FOS like 2, AP-1 transcription factor subunit	GO:0003334 keratinocyte development;GO:0048146 positive regulation of fibroblast proliferation;GO:0030216 keratinocyte differentiation		Transcription factors/Basic domains	Nucleus(Enhanced)		(M65)PID FRA PATHWAY; (M236)PID DELTA NP63 PATHWAY; (M167)PID AP1 PATHWAY	(M5891)HALLMARK HYPOXIA; (M5890)HALLMARK TNFA SIGNALING VIA NFKB	0	0	0	0	0	0	0	0	0	0	0	0	0	0	0	0	0	0	0	0	2
1969	EPHA2	1	1	1969	Gene_ID	H. sapiens	1969	H. sapiens	EPHA2	EPH receptor A2	GO:1901491 negative regulation of lymphangiogenesis;GO:0070309 lens fiber cell morphogenesis;GO:1903348 positive regulation of bicellular tight junction assembly	Tyr protein kinase family	Enzymes/{ENZYME proteins/Transferases,Kinases/Tyr protein kinases};RAS pathway related proteins	Cell Junctions;Plasma membrane(Supported)Golgi apparatus;Nuclear speckles(Approved)	Dasatinib (Transmembrane receptor protein tyrosine kinase activity);Phosphoaminophosphonic Acid-Adenylate Ester (Transmembrane receptor protein tyrosine kinase activity);Regorafenib (Transmembrane receptor protein tyrosine kinase activity)	(M273)PID EPHA2 FWD PATHWAY; (M177)PID EPHA FWDPATHWAY; (M86)PID ARF6 PATHWAY	(M5939)HALLMARK P53 PATHWAY; (M5934)HALLMARK XENOBIOTIC METABOLISM	0	0	0	0	0	1	0	0	0	0	0	0	1	0	0	0	0	0	1	1	2
55055	ZWILCH	1	1	55055	Gene_ID	H. sapiens	55055	H. sapiens	ZWILCH	zwilch kinetochore protein	GO:0007093 mitotic cell cycle checkpoint;GO:0000075 cell cycle checkpoint;GO:0045930 negative regulation of mitotic cell cycle							1	1	1	0	0	0	0	0	0	0	0	0	0	0	0	0	0	0	0	0	2
26586	CKAP2	1	1	26586	Gene_ID	H. sapiens	26586	H. sapiens	CKAP2	cytoskeleton associated protein 2	GO:0007026 negative regulation of microtubule depolymerization;GO:0031114 regulation of microtubule depolymerization;GO:1901880 negative regulation of protein depolymerization			Microtubules(Enhanced)Cytosol(Supported)				0	1	0	0	0	1	0	0	0	0	0	0	0	0	1	0	1	0	0	0	2
10592	SMC2	1	1	10592	Gene_ID	H. sapiens	10592	H. sapiens	SMC2	structural maintenance of chromosomes 2	GO:0010032 meiotic chromosome condensation;GO:0007076 mitotic chromosome condensation;GO:0051383 kinetochore organization			Nucleoli;Nucleus(Supported)		(M14)PID AURORA B PATHWAY	(M5901)HALLMARK G2M CHECKPOINT	1	1	0	0	1	0	0	0	1	0	0	0	0	1	0	1	0	0	0	0	2
6675	UAP1	1	1	6675	Gene_ID	H. sapiens	6675	H. sapiens	UAP1	UDP-N-acetylglucosamine pyrophosphorylase 1	GO:0006048 UDP-N-acetylglucosamine biosynthetic process;GO:0006047 UDP-N-acetylglucosamine metabolic process;GO:0046349 amino sugar biosynthetic process		Enzymes/ENZYME proteins/Transferases	Cytosol(Supported)Nucleoplasm;Plasma membrane(Approved)	Uridine-Diphosphate-N-Acetylgalactosamine (Udp-n-acetylglucosamine diphosphorylase activity);Uridine-Diphosphate-N-Acetylglucosamine (Udp-n-acetylglucosamine diphosphorylase activity)		(M5908)HALLMARK ANDROGEN RESPONSE	0	0	0	0	0	0	0	0	0	0	0	0	0	0	0	0	0	0	0	0	2
50484	RRM2B	1	1	50484	Gene_ID	H. sapiens	50484	H. sapiens	RRM2B	ribonucleotide reductase regulatory TP53 inducible subunit M2B	GO:1902254 negative regulation of intrinsic apoptotic signaling pathway by p53 class mediator;GO:1902253 regulation of intrinsic apoptotic signaling pathway by p53 class mediator;GO:0006264 mitochondrial DNA replication		Enzymes/ENZYME proteins/Oxidoreductases	Cytosol;Nucleoplasm(Supported)	Cladribine (Ribonucleoside-diphosphate reductase activity, thioredoxin disulfide as acceptor)	(M145)PID P53 DOWNSTREAM PATHWAY	(M5898)HALLMARK DNA REPAIR	0	0	0	1	1	0	0	0	0	0	0	0	0	0	0	0	0	0	0	0	2
55270	NUDT15	1	1	55270	Gene_ID	H. sapiens	55270	H. sapiens	NUDT15	nudix hydrolase 15	GO:0006203 dGTP catabolic process;GO:0046070 dGTP metabolic process;GO:0009155 purine deoxyribonucleotide catabolic process		Enzymes/ENZYME proteins/Hydrolases	Nucleoplasm(Supported)			(M5939)HALLMARK P53 PATHWAY	0	0	0	0	0	0	0	0	0	0	0	0	0	0	0	0	0	0	0	0	2
4644	MYO5A	1	1	4644	Gene_ID	H. sapiens	4644	H. sapiens	MYO5A	myosin VA	GO:0031585 regulation of inositol 1,4,5-trisphosphate-sensitive calcium-release channel activity;GO:0051279 regulation of release of sequestered calcium ion into cytosol;GO:0099089 establishment of endoplasmic reticulum localization to postsynapse			Focal adhesion sites;Microtubule organizing center(Approved)				0	0	0	0	0	1	0	0	0	0	0	0	0	0	0	0	0	0	0	0	2
6546	SLC8A1	1	1	6546	Gene_ID	H. sapiens	6546	H. sapiens	SLC8A1	solute carrier family 8 member A1	GO:0010881 regulation of cardiac muscle contraction by regulation of the release of sequestered calcium ion;GO:0010880 regulation of release of sequestered calcium ion into cytosol by sarcoplasmic reticulum;GO:0014808 release of sequestered calcium ion into cytosol by sarcoplasmic reticulum		Transporters/Electrochemical Potential-driven transporters	Plasma membrane(Supported)Nucleoplasm(Approved)	Alpha-Linolenic Acid (Ion channel binding);Icosapent (Ion channel binding)			0	0	0	0	0	1	0	0	0	0	0	0	1	0	0	0	0	1	0	0	2
11130	ZWINT	1	1	11130	Gene_ID	H. sapiens	11130	H. sapiens	ZWINT	ZW10 interacting kinetochore protein	GO:0007093 mitotic cell cycle checkpoint;GO:0000070 mitotic sister chromatid segregation;GO:0000075 cell cycle checkpoint			Cytosol;Nuclear bodies;Nucleoplasm(Approved)			(M5898)HALLMARK DNA REPAIR	1	1	1	0	0	0	0	0	0	0	0	0	0	0	0	0	0	0	0	0	2
134147	CMBL	1	1	134147	Gene_ID	H. sapiens	134147	H. sapiens	CMBL	carboxymethylenebutenolidase homolog	GO:0006805 xenobiotic metabolic process;GO:0071466 cellular response to xenobiotic stimulus;GO:0009410 response to xenobiotic stimulus						(M5905)HALLMARK ADIPOGENESIS	0	0	0	0	0	0	0	0	0	0	0	0	0	0	0	0	0	0	0	0	2
88455	ANKRD13A	1	1	88455	Gene_ID	H. sapiens	88455	H. sapiens	ANKRD13A	ankyrin repeat domain 13A	GO:1905667 negative regulation of protein localization to endosome;GO:0002091 negative regulation of receptor internalization;GO:1905666 regulation of protein localization to endosome			Plasma membrane(Supported)				0	0	0	0	0	0	0	0	0	0	0	0	0	0	1	0	0	0	0	0	2
1404	HAPLN1	1	1	1404	Gene_ID	H. sapiens	1404	H. sapiens	HAPLN1	hyaluronan and proteoglycan link protein 1	GO:0030198 extracellular matrix organization;GO:0043062 extracellular structure organization;GO:0001501 skeletal system development			Vesicles(Supported)	Hyaluronic acid (Hyaluronic acid binding)	(M5882)NABA PROTEOGLYCANS; (M5884)NABA CORE MATRISOME; (M5889)NABA MATRISOME		0	0	0	0	0	0	0	0	0	0	0	0	0	0	0	0	0	0	0	0	2
54892	NCAPG2	1	1	54892	Gene_ID	H. sapiens	54892	H. sapiens	NCAPG2	non-SMC condensin II complex subunit G2	GO:0045647 negative regulation of erythrocyte differentiation;GO:0001833 inner cell mass cell proliferation;GO:0001832 blastocyst growth			Nuclear speckles(Supported)				1	1	0	0	1	0	0	0	1	0	0	0	0	1	0	0	0	0	0	0	2
2177	FANCD2	1	1	2177	Gene_ID	H. sapiens	2177	H. sapiens	FANCD2	FA complementation group D2	GO:1990918 double-strand break repair involved in meiotic recombination;GO:0045589 regulation of regulatory T cell differentiation;GO:0031573 intra-S DNA damage checkpoint			Nuclear bodies;Nucleoli;Nucleus(Supported)Cytosol(Uncertain)		(M258)PID BARD1 PATHWAY; (M84)PID ATM PATHWAY; (M46)PID ATR PATHWAY		0	1	1	0	1	0	0	0	0	0	0	0	0	0	0	1	0	0	0	0	2
347735	SERINC2	1	1	347735	Gene_ID	H. sapiens	347735	H. sapiens	SERINC2	serine incorporator 2	GO:1904219 positive regulation of CDP-diacylglycerol-serine O-phosphatidyltransferase activity;GO:1904222 positive regulation of serine C-palmitoyltransferase activity;GO:1904217 regulation of CDP-diacylglycerol-serine O-phosphatidyltransferase activity							0	0	0	0	0	0	0	0	0	0	0	0	0	0	0	0	0	0	0	0	2
51421	AMOTL2	1	1	51421	Gene_ID	H. sapiens	51421	H. sapiens	AMOTL2	angiomotin like 2	GO:0003365 establishment of cell polarity involved in ameboidal cell migration;GO:0035329 hippo signaling;GO:0001525 angiogenesis			Cell Junctions(Approved)				0	0	0	0	0	1	0	0	0	0	0	0	1	0	0	0	0	0	0	0	2
23216	TBC1D1	1	1	23216	Gene_ID	H. sapiens	23216	H. sapiens	TBC1D1	TBC1 domain family member 1	GO:1902017 regulation of cilium assembly;GO:0090630 activation of GTPase activity;GO:0120032 regulation of plasma membrane bounded cell projection assembly		Transporters/Accessory Factors Involved in Transport	Nucleoli(Uncertain)				0	0	0	0	0	0	0	0	0	0	0	1	0	0	0	0	0	0	0	1	2
9787	DLGAP5	1	1	9787	Gene_ID	H. sapiens	9787	H. sapiens	DLGAP5	DLG associated protein 5	GO:0045842 positive regulation of mitotic metaphase/anaphase transition;GO:0007079 mitotic chromosome movement towards spindle pole;GO:0007221 positive regulation of transcription of Notch receptor target			Cytosol(Supported)Microtubule organizing center(Approved)		(M242)PID AURORA A PATHWAY	(M5893)HALLMARK MITOTIC SPINDLE; (M5925)HALLMARK E2F TARGETS	0	1	1	0	0	1	0	1	0	0	1	0	0	0	0	0	0	0	0	0	2
100616400	MIR3198-2	1	1	100616400	Gene_ID	H. sapiens	100616400	H. sapiens	MIR3198-2	microRNA 3198-2								0	0	0	0	0	0	0	0	0	0	0	0	0	0	0	0	0	0	0	0	2
10051	SMC4	1	1	10051	Gene_ID	H. sapiens	10051	H. sapiens	SMC4	structural maintenance of chromosomes 4	GO:0010032 meiotic chromosome condensation;GO:0007076 mitotic chromosome condensation;GO:0051383 kinetochore organization			Cytosol;Nuclear speckles(Supported)		(M14)PID AURORA B PATHWAY	(M5893)HALLMARK MITOTIC SPINDLE; (M5925)HALLMARK E2F TARGETS; (M5901)HALLMARK G2M CHECKPOINT	1	1	0	0	1	0	0	0	1	0	0	0	0	1	0	1	0	0	0	0	2
6491	STIL	1	1	6491	Gene_ID	H. sapiens	6491	H. sapiens	STIL	STIL centriolar assembly protein	GO:0046599 regulation of centriole replication;GO:0001843 neural tube closure;GO:0071539 protein localization to centrosome			Cytosol;Plasma membrane(Approved)		(M211)PID HEDGEHOG 2PATHWAY	(M5907)HALLMARK ESTROGEN RESPONSE LATE; (M5901)HALLMARK G2M CHECKPOINT	0	1	1	0	0	1	0	0	0	0	0	0	0	0	0	0	0	0	0	0	2
302	ANXA2	1	1	302	Gene_ID	H. sapiens	302	H. sapiens	ANXA2	annexin A2	GO:0052362 catabolism by host of symbiont protein;GO:1905602 positive regulation of receptor-mediated endocytosis involved in cholesterol transport;GO:0052417 metabolism by host of symbiont protein		Transporters/Transporter channels and pores		Tenecteplase (S100 protein binding)	(M5880)NABA ECM AFFILIATED; (M5885)NABA MATRISOME ASSOCIATED; (M5889)NABA MATRISOME	(M5942)HALLMARK UV RESPONSE DN; (M5891)HALLMARK HYPOXIA	0	0	0	0	0	1	0	0	0	0	0	0	1	0	0	0	0	1	0	0	2
26011	TENM4	1	1	26011	Gene_ID	H. sapiens	26011	H. sapiens	TENM4	teneurin transmembrane protein 4	GO:0032289 central nervous system myelin formation;GO:0060912 cardiac cell fate specification;GO:0048714 positive regulation of oligodendrocyte differentiation							0	0	0	0	0	0	0	0	0	0	0	0	0	0	0	0	0	0	0	1	2
6117	RPA1	1	1	6117	Gene_ID	H. sapiens	6117	H. sapiens	RPA1	replication protein A1	GO:0032201 telomere maintenance via semi-conservative replication;GO:0006295 nucleotide-excision repair, DNA incision, 3'-to lesion;GO:0070987 error-free translesion synthesis			Nucleoplasm(Enhanced)		(M46)PID ATR PATHWAY; (M1)PID FANCONI PATHWAY	(M5925)HALLMARK E2F TARGETS; (M5924)HALLMARK MTORC1 SIGNALING	1	0	1	1	1	1	0	0	0	1	0	0	0	1	0	1	0	0	0	0	2
79022	TMEM106C	1	1	79022	Gene_ID	H. sapiens	79022	H. sapiens	TMEM106C	transmembrane protein 106C	GO:0008150 biological_process							0	0	0	0	0	0	0	0	0	0	0	0	0	0	0	0	0	0	0	0	2
26031	OSBPL3	1	1	26031	Gene_ID	H. sapiens	26031	H. sapiens	OSBPL3	oxysterol binding protein like 3	GO:0006699 bile acid biosynthetic process;GO:0008206 bile acid metabolic process;GO:0015918 sterol transport			Cytosol;Nucleoli(Supported)				0	0	0	0	0	0	0	0	0	0	0	0	0	0	0	0	0	0	0	0	2
290	ANPEP	1	1	290	Gene_ID	H. sapiens	290	H. sapiens	ANPEP	alanyl aminopeptidase, membrane	GO:0046718 viral entry into host cell;GO:0030260 entry into host cell;GO:0043312 neutrophil degranulation		CD markers;Enzymes/{ENZYME proteins/Hydrolases,Peptidases/Metallopeptidases}	Plasma membrane(Supported)	Ezetimibe (Zinc ion binding);Icatibant (Zinc ion binding)	(M195)PID CMYB PATHWAY	(M5930)HALLMARK EPITHELIAL MESENCHYMAL TRANSITION	0	0	0	0	0	0	0	0	0	0	0	0	1	0	0	0	0	0	0	0	2
79674	VEPH1	1	1	79674	Gene_ID	H. sapiens	79674	H. sapiens	VEPH1	ventricular zone expressed PH domain containing 1	GO:0060392 negative regulation of SMAD protein signal transduction;GO:0030512 negative regulation of transforming growth factor beta receptor signaling pathway;GO:0060390 regulation of SMAD protein signal transduction			Cytosol;Nucleoli;Nucleus(Approved)				0	0	0	0	0	0	0	0	0	0	0	0	0	0	0	0	0	0	0	0	2
80851	SH3BP5L	1	1	80851	Gene_ID	H. sapiens	80851	H. sapiens	SH3BP5L	SH3 binding domain protein 5 like	GO:0061099 negative regulation of protein tyrosine kinase activity;GO:0050732 negative regulation of peptidyl-tyrosine phosphorylation;GO:0061097 regulation of protein tyrosine kinase activity			Golgi apparatus;Nucleoplasm;Vesicles(Approved)				0	0	0	0	0	0	0	0	0	0	0	0	0	0	0	0	0	0	0	0	2
83540	NUF2	1	1	83540	Gene_ID	H. sapiens	83540	H. sapiens	NUF2	NUF2 component of NDC80 kinetochore complex	GO:0051315 attachment of mitotic spindle microtubules to kinetochore;GO:0007080 mitotic metaphase plate congression;GO:0051310 metaphase plate congression			Nucleus(Supported)				1	1	0	0	0	0	0	0	0	0	0	0	0	1	0	1	0	0	0	0	2
54443	ANLN	1	1	54443	Gene_ID	H. sapiens	54443	H. sapiens	ANLN	anillin actin binding protein	GO:1904172 positive regulation of bleb assembly;GO:1904498 protein localization to mitotic actomyosin contractile ring;GO:1904170 regulation of bleb assembly			Nucleoplasm(Enhanced)Midbody(Approved)			(M5893)HALLMARK MITOTIC SPINDLE	0	1	1	0	0	1	0	1	0	0	0	0	1	0	0	0	1	0	0	1	2
157570	ESCO2	1	1	157570	Gene_ID	H. sapiens	157570	H. sapiens	ESCO2	establishment of sister chromatid cohesion N-acetyltransferase 2	GO:0034421 post-translational protein acetylation;GO:0071168 protein localization to chromatin;GO:0007062 sister chromatid cohesion			Golgi apparatus;Nucleus(Supported)				1	1	0	1	1	0	0	0	0	1	0	0	0	0	0	0	0	0	0	0	2
81563	C1orf21	1	1	81563	Gene_ID	H. sapiens	81563	H. sapiens	C1orf21	chromosome 1 open reading frame 21				Cytosol;Nucleoplasm(Approved)				0	0	0	0	0	0	0	0	0	0	0	0	0	0	0	0	0	0	0	0	2
79710	MORC4	1	1	79710	Gene_ID	H. sapiens	79710	H. sapiens	MORC4	MORC family CW-type zinc finger 4				Nucleoplasm(Enhanced)				0	0	0	0	0	0	0	0	0	0	0	0	0	0	0	0	0	0	0	0	2
10038	PARP2	1	1	10038	Gene_ID	H. sapiens	10038	H. sapiens	PARP2	poly(ADP-ribose) polymerase 2	GO:0061051 positive regulation of cell growth involved in cardiac muscle cell development;GO:0061050 regulation of cell growth involved in cardiac muscle cell development;GO:2000727 positive regulation of cardiac muscle cell differentiation		Enzymes/ENZYME proteins/Transferases	Nucleoli;Nucleus(Approved)	Veliparib (Nad+ adp-ribosyltransferase activity);Olaparib (Nad+ adp-ribosyltransferase activity)	(M105)PID TELOMERASE PATHWAY	(M5951)HALLMARK SPERMATOGENESIS; (M5941)HALLMARK UV RESPONSE UP	0	0	0	0	1	0	0	0	0	0	0	0	0	0	0	0	0	0	0	1	2
2280	FKBP1A	1	1	2280	Gene_ID	H. sapiens	2280	H. sapiens	FKBP1A	FKBP prolyl isomerase 1A	GO:0060315 negative regulation of ryanodine-sensitive calcium-release channel activity;GO:0051280 negative regulation of release of sequestered calcium ion into cytosol;GO:0060314 regulation of ryanodine-sensitive calcium-release channel activity		Enzymes/ENZYME proteins/Isomerase		Pimecrolimus (Type i transforming growth factor beta receptor binding);Tacrolimus (Type i transforming growth factor beta receptor binding);Sirolimus (Type i transforming growth factor beta receptor binding);(3r)-4-(P-Toluenesulfonyl)-1,4-Thiazane-3-Carboxylicacid-L-Phenylalanine Ethyl Ester (Type i transforming growth factor beta receptor binding);{3-[3-(3,4-Dimethoxy-Phenyl)-1-(1-{1-[2-(3,4,5-T…	(M203)PID ALK2 PATHWAY; (M185)PID ALK1 PATHWAY; (M235)PID TCR CALCIUM PATHWAY	(M5896)HALLMARK TGF BETA SIGNALING	0	0	0	0	0	1	0	0	0	0	0	0	0	0	0	0	0	0	0	0	2
64131	XYLT1	1	1	64131	Gene_ID	H. sapiens	64131	H. sapiens	XYLT1	xylosyltransferase 1	GO:0043931 ossification involved in bone maturation;GO:0030206 chondroitin sulfate biosynthetic process;GO:0070977 bone maturation		Enzymes/ENZYME proteins/Transferases					0	0	0	0	0	0	0	0	0	0	0	0	0	0	0	0	0	0	0	0	2
26256	CABYR	1	1	26256	Gene_ID	H. sapiens	26256	H. sapiens	CABYR	calcium binding tyrosine phosphorylation regulated	GO:0048240 sperm capacitation;GO:0003351 epithelial cilium movement;GO:0007286 spermatid development			Cytosol;Nucleus(Supported)				0	1	0	0	0	0	0	0	0	0	0	0	0	0	0	0	0	0	0	0	2
3619	INCENP	1	1	3619	Gene_ID	H. sapiens	3619	H. sapiens	INCENP	inner centromere protein	GO:0051257 meiotic spindle midzone assembly;GO:0010032 meiotic chromosome condensation;GO:0051255 spindle midzone assembly			Midbody;Nuclear bodies;Nucleus(Supported)	N~6~-cyclohexyl-N~2~-(4-morpholin-4-ylphenyl)-9H-purine-2,6-diamine	(M14)PID AURORA B PATHWAY; (M129)PID PLK1 PATHWAY; (M223)PID BETA CATENIN NUC PATHWAY	(M5893)HALLMARK MITOTIC SPINDLE; (M5901)HALLMARK G2M CHECKPOINT	1	1	1	0	1	0	1	0	1	0	0	0	0	1	0	1	1	0	0	0	2
1305	COL13A1	1	1	1305	Gene_ID	H. sapiens	1305	H. sapiens	COL13A1	collagen type XIII alpha 1 chain	GO:0001958 endochondral ossification;GO:0060350 endochondral bone morphogenesis;GO:0036075 replacement ossification					(M3005)NABA COLLAGENS; (M198)PID SYNDECAN 1 PATHWAY; (M160)PID AVB3 INTEGRIN PATHWAY		0	0	0	0	0	0	0	0	0	0	0	0	0	0	0	0	0	0	0	0	2
672	BRCA1	1	1	672	Gene_ID	H. sapiens	672	H. sapiens	BRCA1	BRCA1 DNA repair associated	GO:2000620 positive regulation of histone H4-K16 acetylation;GO:0070512 positive regulation of histone H4-K20 methylation;GO:2000617 positive regulation of histone H3-K9 acetylation		Enzymes/ENZYME proteins/Transferases			(M258)PID BARD1 PATHWAY; (M242)PID AURORA A PATHWAY; (M84)PID ATM PATHWAY	(M5916)HALLMARK APICAL SURFACE; (M5902)HALLMARK APOPTOSIS; (M5950)HALLMARK ALLOGRAFT REJECTION	1	1	1	1	1	1	0	1	0	1	1	1	1	0	1	0	0	0	0	0	2
901	CCNG2	1	1	901	Gene_ID	H. sapiens	901	H. sapiens	CCNG2	cyclin G2	GO:0000079 regulation of cyclin-dependent protein serine/threonine kinase activity;GO:1904029 regulation of cyclin-dependent protein kinase activity;GO:0071900 regulation of protein serine/threonine kinase activity			Cytosol;Nucleoplasm(Approved)			(M5905)HALLMARK ADIPOGENESIS; (M5891)HALLMARK HYPOXIA	0	1	1	0	0	0	0	0	0	0	0	0	0	0	0	0	0	0	0	0	2
348654	GEN1	1	1	348654	Gene_ID	H. sapiens	348654	H. sapiens	GEN1	GEN1 Holliday junction 5' flap endonuclease	GO:0090267 positive regulation of mitotic cell cycle spindle assembly checkpoint;GO:0090266 regulation of mitotic cell cycle spindle assembly checkpoint;GO:1903504 regulation of mitotic spindle checkpoint			Nucleoplasm(Approved)				0	1	1	1	1	1	0	1	0	0	1	0	0	0	1	0	0	0	0	0	2
891	CCNB1	1	1	891	Gene_ID	H. sapiens	891	H. sapiens	CCNB1	cyclin B1	GO:0090266 regulation of mitotic cell cycle spindle assembly checkpoint;GO:1905448 positive regulation of mitochondrial ATP synthesis coupled electron transport;GO:2000775 histone H3-S10 phosphorylation involved in chromosome condensation		Transporters/Transporter channels and pores	Cytosol(Enhanced)		(M176)PID FOXM1 PATHWAY; (M129)PID PLK1 PATHWAY; (M136)PID FOXO PATHWAY		1	1	1	1	1	1	1	1	1	0	1	1	0	1	1	0	0	0	0	0	2
3161	HMMR	1	1	3161	Gene_ID	H. sapiens	3161	H. sapiens	HMMR	hyaluronan mediated motility receptor	GO:0030214 hyaluronan catabolic process;GO:0030212 hyaluronan metabolic process;GO:0006027 glycosaminoglycan catabolic process		CD markers	Centrosome;Cytosol;Microtubules(Enhanced)	Hyaluronic acid (Hyaluronic acid binding)		(M5937)HALLMARK GLYCOLYSIS; (M5925)HALLMARK E2F TARGETS; (M5901)HALLMARK G2M CHECKPOINT	1	0	1	0	0	0	0	0	0	0	0	1	0	0	0	0	0	0	0	0	2
3418	IDH2	1	1	3418	Gene_ID	H. sapiens	3418	H. sapiens	IDH2	isocitrate dehydrogenase (NADP(+)) 2	GO:1904465 negative regulation of matrix metallopeptidase secretion;GO:1903976 negative regulation of glial cell migration;GO:0006741 NADP biosynthetic process		Citric acid cycle related proteins;Enzymes/ENZYME proteins/Oxidoreductases	Mitochondria(Supported)	Isocitric Acid (Nad binding)		(M5949)HALLMARK PEROXISOME; (M5948)HALLMARK BILE ACID METABOLISM; (M5936)HALLMARK OXIDATIVE PHOSPHORYLATION	0	0	0	0	0	0	0	0	0	0	0	1	0	0	0	0	0	0	0	0	2
4851	HN1	1	1	4851	Gene_ID	H. sapiens	4851	H. sapiens	NOTCH1	notch receptor 1	GO:0003270 Notch signaling pathway involved in regulation of secondary heart field cardioblast proliferation;GO:0072144 glomerular mesangial cell development;GO:0003252 negative regulation of cell proliferation involved in heart valve morphogenesis			Nucleoplasm(Approved)		(M70)PID PS1 PATHWAY; (M236)PID DELTA NP63 PATHWAY; (M288)PID HES HEY PATHWAY	(M5903)HALLMARK NOTCH SIGNALING; (M5895)HALLMARK WNT BETA CATENIN SIGNALING; (M5909)HALLMARK MYOGENESIS	0	1	1	0	0	0	0	0	0	0	0	1	1	0	1	0	0	0	1	1	2
3075	CFH	1	1	3075	Gene_ID	H. sapiens	3075	H. sapiens	CFH	complement factor H	GO:0006957 complement activation, alternative pathway;GO:1903659 regulation of complement-dependent cytotoxicity;GO:0030449 regulation of complement activation			Vesicles(Approved)			(M5946)HALLMARK COAGULATION; (M5921)HALLMARK COMPLEMENT; (M5953)HALLMARK KRAS SIGNALING UP	0	0	0	0	0	0	0	0	0	0	0	0	0	0	0	0	0	0	0	0	2
79801	SHCBP1	1	1	79801	Gene_ID	H. sapiens	79801	H. sapiens	SHCBP1	SHC binding and spindle associated 1	GO:0008543 fibroblast growth factor receptor signaling pathway;GO:0044344 cellular response to fibroblast growth factor stimulus;GO:2000177 regulation of neural precursor cell proliferation			Cytokinetic bridge;Microtubules(Supported)Nuclear bodies(Approved)				0	0	0	0	0	0	0	0	0	0	0	0	0	1	0	0	0	0	0	0	2
203	AK1	1	1	203	Gene_ID	H. sapiens	203	H. sapiens	AK1	adenylate kinase 1	GO:0006172 ADP biosynthetic process;GO:0009180 purine ribonucleoside diphosphate biosynthetic process;GO:0009136 purine nucleoside diphosphate biosynthetic process		Enzymes/ENZYME proteins/Transferases	Cytosol(Supported)	Bis(Adenosine)-5'-Pentaphosphate (Nucleoside diphosphate kinase activity)		(M5898)HALLMARK DNA REPAIR; (M5909)HALLMARK MYOGENESIS; (M5939)HALLMARK P53 PATHWAY	0	0	0	0	0	0	0	0	0	0	0	0	0	0	0	0	0	0	0	0	2
2491	CENPI	1	1	2491	Gene_ID	H. sapiens	2491	H. sapiens	CENPI	centromere protein I	GO:0034080 CENP-A containing nucleosome assembly;GO:0006336 DNA replication-independent nucleosome assembly;GO:0031055 chromatin remodeling at centromere			Nuclear bodies(Supported)Cytosol(Approved)				1	0	0	0	1	0	0	0	0	0	0	0	0	1	0	0	0	0	0	0	2
3833	KIFC1	1	1	3833	Gene_ID	H. sapiens	3833	H. sapiens	KIFC1	kinesin family member C1	GO:0007080 mitotic metaphase plate congression;GO:0090307 mitotic spindle assembly;GO:0051310 metaphase plate congression			Centrosome(Approved)				0	1	0	0	0	0	0	0	0	0	0	0	0	0	0	0	0	1	0	0	2
115701	ALPK2	1	1	115701	Gene_ID	H. sapiens	115701	H. sapiens	ALPK2	alpha kinase 2	GO:0003308 negative regulation of Wnt signaling pathway involved in heart development;GO:0003307 regulation of Wnt signaling pathway involved in heart development;GO:1905223 epicardium morphogenesis	Atypical: Alpha-type protein kinase family	Enzymes/Kinases/Atypical kinases	Cytosol(Approved)				0	0	0	0	0	0	0	0	0	0	0	0	0	0	0	0	0	0	0	0	2
121457	IKBIP	1	1	121457	Gene_ID	H. sapiens	121457	H. sapiens	IKBIP	IKBKB interacting protein	GO:0010165 response to X-ray;GO:0010212 response to ionizing radiation;GO:0009314 response to radiation			Endoplasmic reticulum(Enhanced)				0	0	0	0	0	0	0	0	0	0	0	0	0	0	0	0	0	0	0	0	2
2139	EYA2	1	1	2139	Gene_ID	H. sapiens	2139	H. sapiens	EYA2	EYA transcriptional coactivator and phosphatase 2	GO:0007501 mesodermal cell fate specification;GO:0097345 mitochondrial outer membrane permeabilization;GO:0001710 mesodermal cell fate commitment		Enzymes/ENZYME proteins/Hydrolases	Cytosol(Supported)				0	0	0	0	1	0	0	0	0	1	0	0	0	0	0	0	0	0	0	0	2
284	ANGPT1	1	1	284	Gene_ID	H. sapiens	284	H. sapiens	ANGPT1	angiopoietin 1	GO:0002740 negative regulation of cytokine secretion involved in immune response;GO:2000446 regulation of macrophage migration inhibitory factor signaling pathway;GO:0030210 heparin biosynthetic process		RAS pathway related proteins			(M92)PID ANGIOPOIETIN RECEPTOR PATHWAY; (M100)PID SHP2 PATHWAY; (M5883)NABA SECRETED FACTORS	(M5905)HALLMARK ADIPOGENESIS	0	0	0	0	0	0	0	0	0	0	0	0	1	0	0	0	0	1	1	1	2
5915	RARB	1	1	5915	Gene_ID	H. sapiens	5915	H. sapiens	RARB	retinoic acid receptor beta	GO:0021756 striatum development;GO:0032331 negative regulation of chondrocyte differentiation;GO:0003417 growth plate cartilage development		Nuclear receptors;Transcription factors/Zinc-coordinating DNA-binding domains	Nucleoplasm(Enhanced)	Adapalene (Zinc ion binding);Acitretin (Zinc ion binding);Alitretinoin (Zinc ion binding);Tazarotene (Zinc ion binding);Etretinate (Zinc ion binding);TTNPB (Zinc ion binding);Tamibarotene (Zinc ion binding);LGD-1550 (Zinc ion binding)	(M162)PID RXR VDR PATHWAY; (M207)PID RETINOIC ACID PATHWAY		0	0	0	0	0	0	0	0	0	0	0	0	0	0	0	0	0	0	0	1	2
22943	DKK1	1	1	22943	Gene_ID	H. sapiens	22943	H. sapiens	DKK1	dickkopf WNT signaling pathway inhibitor 1	GO:0090082 positive regulation of heart induction by negative regulation of canonical Wnt signaling pathway;GO:1901296 negative regulation of canonical Wnt signaling pathway involved in cardiac muscle cell fate commitment;GO:0090081 regulation of heart induction by regulation of canonical Wnt signaling pathway					(M77)PID WNT SIGNALING PATHWAY; (M17761)ST WNT BETA CATENIN PATHWAY; (M70)PID PS1 PATHWAY	(M5895)HALLMARK WNT BETA CATENIN SIGNALING; (M5930)HALLMARK EPITHELIAL MESENCHYMAL TRANSITION	0	0	0	0	0	1	0	0	0	1	0	0	0	0	1	0	0	0	0	1	2
9133	CCNB2	1	1	9133	Gene_ID	H. sapiens	9133	H. sapiens	CCNB2	cyclin B2	GO:0007077 mitotic nuclear envelope disassembly;GO:0051081 nuclear envelope disassembly;GO:0043029 T cell homeostasis		Transporters/Transporter channels and pores	Cytosol(Enhanced)Golgi apparatus(Supported)		(M176)PID FOXM1 PATHWAY; (M236)PID DELTA NP63 PATHWAY	(M5951)HALLMARK SPERMATOGENESIS; (M5893)HALLMARK MITOTIC SPINDLE; (M5925)HALLMARK E2F TARGETS	1	1	1	1	0	0	0	0	1	0	0	1	0	0	0	0	0	0	0	0	2
1004	CDH6	1	1	1004	Gene_ID	H. sapiens	1004	H. sapiens	CDH6	cadherin 6	GO:0016339 calcium-dependent cell-cell adhesion via plasma membrane cell adhesion molecules;GO:0044331 cell-cell adhesion mediated by cadherin;GO:0007156 homophilic cell adhesion via plasma membrane adhesion molecules						(M5915)HALLMARK APICAL JUNCTION; (M5930)HALLMARK EPITHELIAL MESENCHYMAL TRANSITION	0	0	0	0	0	0	0	0	0	0	0	0	0	0	0	0	0	0	0	0	2
11168	PSIP1	1	1	11168	Gene_ID	H. sapiens	11168	H. sapiens	PSIP1	PC4 and SFRS1 interacting protein 1	GO:0075713 establishment of integrated proviral latency;GO:0019043 establishment of viral latency;GO:0000395 mRNA 5'-splice site recognition			Nucleoplasm(Enhanced)			(M5925)HALLMARK E2F TARGETS	0	0	0	0	0	0	0	0	0	0	0	0	0	0	0	0	0	0	0	0	2
150468	CKAP2L	1	1	150468	Gene_ID	H. sapiens	150468	H. sapiens	CKAP2L	cytoskeleton associated protein 2 like				Mitotic spindle(Enhanced)Cytosol(Approved)				0	0	0	0	0	0	0	0	0	0	0	0	0	0	0	0	0	0	0	0	2
25758	KIAA1549L	1	1	25758	Gene_ID	H. sapiens	25758	H. sapiens	KIAA1549L	KIAA1549 like				Nucleoplasm(Approved)				0	0	0	0	0	0	0	0	0	0	0	0	0	0	0	0	0	0	0	0	2
80346	REEP4	1	1	80346	Gene_ID	H. sapiens	80346	H. sapiens	REEP4	receptor accessory protein 4	GO:0007084 mitotic nuclear envelope reassembly;GO:0031468 nuclear envelope reassembly;GO:0006998 nuclear envelope organization			Cytosol(Approved)				0	1	0	0	0	0	0	0	0	0	0	0	0	0	0	0	0	0	0	0	2
10615	SPAG5	1	1	10615	Gene_ID	H. sapiens	10615	H. sapiens	SPAG5	sperm associated antigen 5	GO:1905832 positive regulation of spindle assembly;GO:0090235 regulation of metaphase plate congression;GO:0071539 protein localization to centrosome						(M5925)HALLMARK E2F TARGETS	0	1	1	0	0	1	0	1	0	0	1	0	0	0	0	0	0	0	0	0	2
1278	COL1A2	1	1	1278	Gene_ID	H. sapiens	1278	H. sapiens	COL1A2	collagen type I alpha 2 chain	GO:0070208 protein heterotrimerization;GO:0043589 skin morphogenesis;GO:0070206 protein trimerization			Endoplasmic reticulum(Supported)	Collagenase clostridium histolyticum (Protein binding, bridging)	(M274)PID LYMPH ANGIOGENESIS PATHWAY; (M65)PID FRA PATHWAY; (M53)PID INTEGRIN3 PATHWAY	(M5942)HALLMARK UV RESPONSE DN; (M5930)HALLMARK EPITHELIAL MESENCHYMAL TRANSITION	0	0	0	0	0	1	0	0	0	0	0	0	1	0	0	0	0	1	0	0	2
699	BUB1	1	1	699	Gene_ID	H. sapiens	699	H. sapiens	BUB1	BUB1 mitotic checkpoint serine/threonine kinase	GO:0007094 mitotic spindle assembly checkpoint;GO:0051754 meiotic sister chromatid cohesion, centromeric;GO:0071174 mitotic spindle checkpoint	Other	Enzymes/{ENZYME proteins/Transferases,Kinases}	Nucleoplasm(Supported)Cytosol(Approved)		(M14)PID AURORA B PATHWAY; (M129)PID PLK1 PATHWAY; (M19)PID P73PATHWAY	(M5951)HALLMARK SPERMATOGENESIS; (M5893)HALLMARK MITOTIC SPINDLE; (M5924)HALLMARK MTORC1 SIGNALING	1	1	1	0	0	0	1	1	1	0	0	0	0	0	1	1	0	0	0	0	2
57060	PCBP4	1	1	57060	Gene_ID	H. sapiens	57060	H. sapiens	PCBP4	poly(rC) binding protein 4	GO:0006977 DNA damage response, signal transduction by p53 class mediator resulting in cell cycle arrest;GO:0072431 signal transduction involved in mitotic G1 DNA damage checkpoint;GO:0031571 mitotic G1 DNA damage checkpoint			Cytosol(Supported)		(M145)PID P53 DOWNSTREAM PATHWAY		1	0	1	0	0	0	0	0	0	0	1	0	0	0	0	0	0	0	0	0	2
9824	ARHGAP11A	1	1	9824	Gene_ID	H. sapiens	9824	H. sapiens	ARHGAP11A	Rho GTPase activating protein 11A	GO:0043547 positive regulation of GTPase activity;GO:0051056 regulation of small GTPase mediated signal transduction;GO:0043087 regulation of GTPase activity			Cytosol;Nucleoli(Approved)				1	0	0	0	0	0	0	0	0	0	0	0	0	0	0	0	0	0	0	0	2
900	CCNG1	1	1	900	Gene_ID	H. sapiens	900	H. sapiens	CCNG1	cyclin G1	GO:0000079 regulation of cyclin-dependent protein serine/threonine kinase activity;GO:1904029 regulation of cyclin-dependent protein kinase activity;GO:0071900 regulation of protein serine/threonine kinase activity			Nucleoplasm(Supported)		(M261)PID P53 REGULATION PATHWAY; (M145)PID P53 DOWNSTREAM PATHWAY	(M5939)HALLMARK P53 PATHWAY; (M5924)HALLMARK MTORC1 SIGNALING	0	1	1	0	0	0	0	0	0	0	0	0	0	0	0	0	0	0	0	0	2
22871	NLGN1	1	1	22871	Gene_ID	H. sapiens	22871	H. sapiens	NLGN1	neuroligin 1	GO:0010841 positive regulation of circadian sleep/wake cycle, wakefulness;GO:1905520 positive regulation of presynaptic active zone assembly;GO:0061002 negative regulation of dendritic spine morphogenesis			Nuclear bodies;Plasma membrane(Uncertain)				0	0	0	0	0	1	0	0	0	0	0	0	0	0	1	0	0	0	0	1	2
9079	LDB2	1	1	9079	Gene_ID	H. sapiens	9079	H. sapiens	LDB2	LIM domain binding 2	GO:0010669 epithelial structure maintenance;GO:0001942 hair follicle development;GO:0035019 somatic stem cell population maintenance			Nucleoli;Nucleus(Supported)Plasma membrane(Approved)				0	0	0	0	0	1	0	0	0	0	0	0	0	0	0	0	0	0	0	0	2
91057	CCDC34	1	1	91057	Gene_ID	H. sapiens	91057	H. sapiens	CCDC34	coiled-coil domain containing 34				Nuclear membrane;Nucleoli fibrillar center(Approved)				0	0	0	0	0	0	0	0	0	0	0	0	0	0	0	0	0	0	0	0	2
23034	SAMD4A	1	1	23034	Gene_ID	H. sapiens	23034	H. sapiens	SAMD4A	sterile alpha motif domain containing 4A	GO:0000289 nuclear-transcribed mRNA poly(A) tail shortening;GO:0000288 nuclear-transcribed mRNA catabolic process, deadenylation-dependent decay;GO:0043488 regulation of mRNA stability			Cytosol(Supported)Cell Junctions(Approved)				0	0	0	0	0	0	0	0	0	0	0	0	0	0	0	0	0	0	0	0	2
79633	FAT4	1	1	79633	Gene_ID	H. sapiens	79633	H. sapiens	FAT4	FAT atypical cadherin 4	GO:0072307 regulation of metanephric nephron tubule epithelial cell differentiation;GO:0072257 metanephric nephron tubule epithelial cell differentiation;GO:0001658 branching involved in ureteric bud morphogenesis			Cytosol(Approved)				0	0	0	0	0	0	0	0	0	0	0	0	0	0	0	0	0	0	0	0	2
4193	MDM2	1	1	4193	Gene_ID	H. sapiens	4193	H. sapiens	MDM2	MDM2 proto-oncogene	GO:0071301 cellular response to vitamin B1;GO:0006977 DNA damage response, signal transduction by p53 class mediator resulting in cell cycle arrest;GO:0072431 signal transduction involved in mitotic G1 DNA damage checkpoint		Enzymes/ENZYME proteins/Transferases	Nucleus(Supported)	Cis-[4,5-Bis-(4-Bromophenyl)-2-(2-Ethoxy-4-Methoxyphenyl)-4,5-Dihydroimidazol-1-Yl]-[4-(2-Hydroxyethyl)Piperazin-1-Yl]Methanone (Zinc ion binding);Cis-[4,5-Bis-(4-Chlorophenyl)-2-(2-Isopropoxy-4-Methoxyphenyl)-4,5-Dihyd Roimidazol-1-Yl]-Piperazin-1-Yl-Methanone (Zinc ion binding)	(M140)PID RANBP2 PATHWAY; (M1529)SA G1 AND S PHASES; (M242)PID AURORA A PATHWAY	(M5939)HALLMARK P53 PATHWAY	1	0	1	0	0	1	0	0	0	1	1	0	1	0	1	0	0	0	0	1	2
8436	SDPR	1	1	8436	Gene_ID	H. sapiens	8436	H. sapiens	CAVIN2	caveolae associated protein 2	GO:0097320 plasma membrane tubulation;GO:0007009 plasma membrane organization;GO:0010256 endomembrane system organization			Cytosol;Plasma membrane(Supported)			(M5905)HALLMARK ADIPOGENESIS	0	0	0	0	0	0	0	0	0	0	0	0	0	0	0	0	0	0	0	0	2
1633	DCK	1	1	1633	Gene_ID	H. sapiens	1633	H. sapiens	DCK	deoxycytidine kinase	GO:0043097 pyrimidine nucleoside salvage;GO:0009157 deoxyribonucleoside monophosphate biosynthetic process;GO:0043174 nucleoside salvage		Enzymes/ENZYME proteins/Transferases	Nucleus(Supported)	Fludarabine (Protein homodimerization activity);2'-Deoxycytidine (Protein homodimerization activity);CP-4055 (Protein homodimerization activity)		(M5925)HALLMARK E2F TARGETS	0	0	0	0	0	0	0	0	0	0	0	0	0	0	0	0	0	0	0	0	2
122786	FRMD6	1	1	122786	Gene_ID	H. sapiens	122786	H. sapiens	FRMD6	FERM domain containing 6	GO:0003383 apical constriction;GO:0003382 epithelial cell morphogenesis;GO:0070252 actin-mediated cell contraction			Mitochondria(Approved)				0	0	0	0	0	1	0	0	0	0	0	0	0	0	0	0	0	0	0	1	2
3148	HMGB2	1	1	3148	Gene_ID	H. sapiens	3148	H. sapiens	HMGB2	high mobility group box 2	GO:0045654 positive regulation of megakaryocyte differentiation;GO:0007289 spermatid nucleus differentiation;GO:0045648 positive regulation of erythrocyte differentiation			Nucleus(Supported)Nucleoli(Approved)			(M5902)HALLMARK APOPTOSIS; (M5925)HALLMARK E2F TARGETS	0	0	0	0	1	0	0	0	0	0	0	0	1	1	0	0	0	0	0	1	2
1062	CENPE	1	1	1062	Gene_ID	H. sapiens	1062	H. sapiens	CENPE	centromere protein E	GO:0099607 lateral attachment of mitotic spindle microtubules to kinetochore;GO:0099606 microtubule plus-end directed mitotic chromosome migration;GO:0007079 mitotic chromosome movement towards spindle pole			Cytosol;Microtubules;Nucleoplasm(Approved)	GSK-923295 (Microtubule motor activity)	(M129)PID PLK1 PATHWAY	(M5893)HALLMARK MITOTIC SPINDLE; (M5925)HALLMARK E2F TARGETS; (M5901)HALLMARK G2M CHECKPOINT	1	1	1	0	0	0	1	1	0	0	0	0	0	1	0	0	0	1	0	0	2
4008	LMO7	1	1	4008	Gene_ID	H. sapiens	4008	H. sapiens	LMO7	LIM domain 7	GO:0043687 post-translational protein modification;GO:0000209 protein polyubiquitination;GO:0045944 positive regulation of transcription by RNA polymerase II			Actin filaments(Supported)Cytosol(Approved)				0	0	0	0	0	0	0	0	0	0	0	0	0	0	0	0	0	0	1	0	2
79625	NDNF	1	1	79625	Gene_ID	H. sapiens	79625	H. sapiens	NDNF	neuron derived neurotrophic factor	GO:0061042 vascular wound healing;GO:0019800 peptide cross-linking via chondroitin 4-sulfate glycosaminoglycan;GO:0060055 angiogenesis involved in wound healing			Vesicles(Supported)		(M3008)NABA ECM GLYCOPROTEINS; (M5884)NABA CORE MATRISOME; (M5889)NABA MATRISOME		0	0	0	0	0	0	0	0	0	0	0	0	1	0	0	0	0	0	1	1	2
7402	UTRN	1	1	7402	Gene_ID	H. sapiens	7402	H. sapiens	UTRN	utrophin	GO:0014894 response to denervation involved in regulation of muscle adaptation;GO:0014877 response to muscle inactivity involved in regulation of muscle adaptation;GO:0014874 response to stimulus involved in regulation of muscle adaptation			Plasma membrane(Supported)Nucleoplasm(Uncertain)				0	0	0	0	0	0	0	0	0	0	0	0	0	0	0	0	0	0	1	0	2
4637	MYL6	1	1	4637	Gene_ID	H. sapiens	4637	H. sapiens	MYL6	myosin light chain 6	GO:0030049 muscle filament sliding;GO:0033275 actin-myosin filament sliding;GO:0070252 actin-mediated cell contraction							1	0	0	0	0	1	0	0	0	0	0	0	0	0	0	0	0	0	0	0	2
4085	MAD2L1	1	1	4085	Gene_ID	H. sapiens	4085	H. sapiens	MAD2L1	mitotic arrest deficient 2 like 1	GO:0090267 positive regulation of mitotic cell cycle spindle assembly checkpoint;GO:0090266 regulation of mitotic cell cycle spindle assembly checkpoint;GO:1903504 regulation of mitotic spindle checkpoint			Nucleoplasm(Approved)			(M5925)HALLMARK E2F TARGETS; (M5901)HALLMARK G2M CHECKPOINT; (M5926)HALLMARK MYC TARGETS V1	1	1	1	0	0	0	0	1	0	0	1	0	0	0	1	0	0	0	0	0	2
81607	NECTIN4	1	1	81607	Gene_ID	H. sapiens	81607	H. sapiens	NECTIN4	nectin cell adhesion molecule 4	GO:0046718 viral entry into host cell;GO:0030260 entry into host cell;GO:0051806 entry into cell of other organism involved in symbiotic interaction			Plasma membrane(Supported)			(M5915)HALLMARK APICAL JUNCTION	0	0	0	0	0	0	0	0	0	0	0	0	0	0	0	0	0	0	0	0	2
3491	CYR61	1	1	3491	Gene_ID	H. sapiens	3491	H. sapiens	CCN1	cellular communication network factor 1	GO:0002041 intussusceptive angiogenesis;GO:2000304 positive regulation of ceramide biosynthetic process;GO:0060710 chorio-allantoic fusion					(M212)PID INTEGRIN5 PATHWAY; (M169)PID INTEGRIN2 PATHWAY; (M53)PID INTEGRIN3 PATHWAY	(M5942)HALLMARK UV RESPONSE DN; (M5891)HALLMARK HYPOXIA; (M5890)HALLMARK TNFA SIGNALING VIA NFKB	0	0	0	0	0	0	0	0	0	0	0	0	1	0	0	0	0	0	1	1	2
8728	ADAM19	1	1	8728	Gene_ID	H. sapiens	8728	H. sapiens	ADAM19	ADAM metallopeptidase domain 19	GO:2000049 positive regulation of cell-cell adhesion mediated by cadherin;GO:2000047 regulation of cell-cell adhesion mediated by cadherin;GO:0044331 cell-cell adhesion mediated by cadherin			Vesicles(Approved)		(M3468)NABA ECM REGULATORS; (M5885)NABA MATRISOME ASSOCIATED; (M5889)NABA MATRISOME	(M5947)HALLMARK IL2 STAT5 SIGNALING	0	0	0	0	0	0	0	0	0	0	0	0	0	0	0	0	0	0	1	0	2
995	CDC25C	1	1	995	Gene_ID	H. sapiens	995	H. sapiens	CDC25C	cell division cycle 25C	GO:0006977 DNA damage response, signal transduction by p53 class mediator resulting in cell cycle arrest;GO:0110032 positive regulation of G2/MI transition of meiotic cell cycle;GO:0072431 signal transduction involved in mitotic G1 DNA damage checkpoint		Enzymes/ENZYME proteins/Hydrolases	Nuclear speckles(Supported)		(M84)PID ATM PATHWAY; (M46)PID ATR PATHWAY; (M129)PID PLK1 PATHWAY		1	1	1	1	0	0	1	1	0	0	1	1	0	0	0	1	0	0	0	0	2
5214	PFKP	1	1	5214	Gene_ID	H. sapiens	5214	H. sapiens	PFKP	phosphofructokinase, platelet	GO:0061621 canonical glycolysis;GO:0061620 glycolytic process through glucose-6-phosphate;GO:0061615 glycolytic process through fructose-6-phosphate		Enzymes/ENZYME proteins/Transferases	Cytosol(Supported)			(M5938)HALLMARK REACTIVE OXIGEN SPECIES PATHWAY; (M5937)HALLMARK GLYCOLYSIS; (M5913)HALLMARK INTERFERON GAMMA RESPONSE	0	0	0	0	0	0	0	0	0	0	0	0	0	0	0	0	0	0	0	0	2
9500	MAGED1	1	1	9500	Gene_ID	H. sapiens	9500	H. sapiens	MAGED1	MAGE family member D1	GO:0090190 positive regulation of branching involved in ureteric bud morphogenesis;GO:0090189 regulation of branching involved in ureteric bud morphogenesis;GO:0001658 branching involved in ureteric bud morphogenesis			Cytosol(Approved)		(M187)PID TRKR PATHWAY; (M153)PID P75 NTR PATHWAY		0	0	0	0	0	0	0	0	0	0	0	0	1	0	0	0	0	0	0	0	2
10370	CITED2	1	1	10370	Gene_ID	H. sapiens	10370	H. sapiens	CITED2	Cbp/p300 interacting transactivator with Glu/Asp rich carboxy-terminal domain 2	GO:1900164 nodal signaling pathway involved in determination of lateral mesoderm left/right asymmetry;GO:0035802 adrenal cortex formation;GO:2000020 positive regulation of male gonad development			Nucleoplasm(Supported)		(M44)PID HIF2PATHWAY; (M255)PID HIF1 TFPATHWAY	(M5942)HALLMARK UV RESPONSE DN; (M5937)HALLMARK GLYCOLYSIS; (M5891)HALLMARK HYPOXIA	0	0	0	0	0	0	0	0	0	0	1	0	0	0	0	0	0	0	1	0	2
120	ADD3	1	1	120	Gene_ID	H. sapiens	120	H. sapiens	ADD3	adducin 3	GO:0051016 barbed-end actin filament capping;GO:0051693 actin filament capping;GO:0030835 negative regulation of actin filament depolymerization			Plasma membrane(Supported)			(M5942)HALLMARK UV RESPONSE DN; (M5906)HALLMARK ESTROGEN RESPONSE EARLY; (M5907)HALLMARK ESTROGEN RESPONSE LATE	0	0	0	0	0	1	0	0	0	0	0	0	0	0	1	0	0	0	0	0	2
4651	MYO10	1	1	4651	Gene_ID	H. sapiens	4651	H. sapiens	MYO10	myosin X	GO:0038096 Fc-gamma receptor signaling pathway involved in phagocytosis;GO:0002431 Fc receptor mediated stimulatory signaling pathway;GO:0038094 Fc-gamma receptor signaling pathway			Cytosol;Plasma membrane(Supported)Nucleoli(Approved)		(M108)PID NETRIN PATHWAY		0	0	0	0	0	0	0	0	0	0	0	0	0	0	0	0	0	0	1	1	2
7153	TOP2A	1	1	7153	Gene_ID	H. sapiens	7153	H. sapiens	TOP2A	DNA topoisomerase II alpha	GO:0045870 positive regulation of single stranded viral RNA replication via double stranded DNA intermediate;GO:0045091 regulation of single stranded viral RNA replication via double stranded DNA intermediate;GO:1905463 negative regulation of DNA duplex unwinding		Enzymes/ENZYME proteins/Isomerase	Nucleus(Supported)Nucleoli(Approved)	Moxifloxacin (Ubiquitin binding);Amsacrine (Ubiquitin binding);Dexrazoxane (Ubiquitin binding);Valrubicin (Ubiquitin binding);Teniposide (Ubiquitin binding);Epirubicin (Ubiquitin binding);Enoxacin (Ubiquitin binding);Pefloxacin (Ubiquitin binding);Ciprofloxacin (Ubiquitin binding);Trovafloxacin (Ubiquitin binding);Daunorubicin (Ubiquitin binding);Etoposide (Ubiquitin binding);Lomefloxacin (Ubiqui…	(M236)PID DELTA NP63 PATHWAY	(M5949)HALLMARK PEROXISOME; (M5902)HALLMARK APOPTOSIS; (M5893)HALLMARK MITOTIC SPINDLE	1	1	1	1	1	0	0	1	1	0	0	0	0	1	1	1	0	0	0	0	2
57574	MARCH4	1	1	57574	Gene_ID	H. sapiens	57574	H. sapiens	MARCHF4	membrane associated ring-CH-type finger 4	GO:0016567 protein ubiquitination;GO:0032446 protein modification by small protein conjugation;GO:0070647 protein modification by small protein conjugation or removal		Enzymes/ENZYME proteins/Transferases					0	0	0	0	0	0	0	0	0	0	0	0	0	0	0	0	0	0	0	0	2
57405	SPC25	1	1	57405	Gene_ID	H. sapiens	57405	H. sapiens	SPC25	SPC25 component of NDC80 kinetochore complex	GO:0007052 mitotic spindle organization;GO:1902850 microtubule cytoskeleton organization involved in mitosis;GO:0007051 spindle organization			Cytosol(Enhanced)			(M5925)HALLMARK E2F TARGETS	1	1	0	0	0	0	0	0	0	0	0	0	0	0	0	0	0	0	0	0	2
162681	C18orf54	1	1	162681	Gene_ID	H. sapiens	162681	H. sapiens	C18orf54	chromosome 18 open reading frame 54	GO:0008285 negative regulation of cell proliferation;GO:0042127 regulation of cell proliferation;GO:0008283 cell proliferation			Nucleoplasm(Approved)				0	0	0	0	0	0	0	0	0	0	0	0	0	0	0	0	0	0	0	0	2
3885	KRT34	1	1	3885	Gene_ID	H. sapiens	3885	H. sapiens	KRT34	keratin 34	GO:0070268 cornification;GO:0031424 keratinization;GO:0030216 keratinocyte differentiation			Nucleus;Vesicles(Approved)				0	0	0	0	0	0	0	0	0	0	0	0	0	0	0	0	0	0	0	0	2
5069	PAPPA	1	1	5069	Gene_ID	H. sapiens	5069	H. sapiens	PAPPA	pappalysin 1	GO:0032354 response to follicle-stimulating hormone;GO:0034698 response to gonadotropin;GO:0051384 response to glucocorticoid		Enzymes/{ENZYME proteins/Hydrolases,Peptidases/Metallopeptidases}	Cytosol;Plasma membrane(Uncertain)		(M17200)SA B CELL RECEPTOR COMPLEXES; (M3721)ST JNK MAPK PATHWAY; (M3468)NABA ECM REGULATORS		0	0	0	0	0	0	0	0	0	0	0	0	0	0	0	0	0	0	0	0	2
1111	CHEK1	1	1	1111	Gene_ID	H. sapiens	1111	H. sapiens	CHEK1	checkpoint kinase 1	GO:0035407 histone H3-T11 phosphorylation;GO:2000615 regulation of histone H3-K9 acetylation;GO:0010767 regulation of transcription from RNA polymerase II promoter in response to UV-induced DNA damage	CAMK Ser/Thr protein kinase family	Enzymes/{ENZYME proteins/Transferases,Kinases/CAMK Ser/Thr protein kinases}	Nucleoplasm;Vesicles(Approved)	XL844 (Protein serine/threonine kinase activity);4-[(3S)-1-AZABICYCLO[2.2.2]OCT-3-YLAMINO]-3-(1H-BENZIMIDAZOL-2-YL)-6-CHLOROQUINOLIN-2(1H)-ONE (Protein serine/threonine kinase activity);N-{5-[4-(4-METHYLPIPERAZIN-1-YL)PHENYL]-1H-PYRROLO[2,3-B]PYRIDIN-3-YL}NICOTINAMIDE (Protein serine/threonine kinase activity);3-(5-{[4-(AMINOMETHYL)PIPERIDIN-1-YL]METHYL}-1H-INDOL-2-YL)QUINOLIN-2(1H)-ONE (Protein …	(M10154)SA G2 AND M PHASES; (M95)PID CIRCADIAN PATHWAY; (M46)PID ATR PATHWAY	(M5925)HALLMARK E2F TARGETS; (M5901)HALLMARK G2M CHECKPOINT	1	1	1	1	1	1	0	1	0	1	1	1	0	1	1	0	0	0	0	0	2
11346	SYNPO	1	1	11346	Gene_ID	H. sapiens	11346	H. sapiens	SYNPO	synaptopodin	GO:0099588 positive regulation of postsynaptic cytosolic calcium concentration;GO:0098886 modification of dendritic spine;GO:0099566 regulation of postsynaptic cytosolic calcium ion concentration			Actin filaments;Cytosol;Nucleoplasm(Approved)			(M5893)HALLMARK MITOTIC SPINDLE; (M5956)HALLMARK KRAS SIGNALING DN	0	0	0	0	0	1	0	0	0	0	0	0	0	0	0	0	0	0	0	0	2
3037	HAS2	1	1	3037	Gene_ID	H. sapiens	3037	H. sapiens	HAS2	hyaluronan synthase 2	GO:1900625 positive regulation of monocyte aggregation;GO:1900127 positive regulation of hyaluronan biosynthetic process;GO:1900623 regulation of monocyte aggregation		Enzymes/ENZYME proteins/Transferases	Nuclear speckles(Approved)			(M5942)HALLMARK UV RESPONSE DN; (M5932)HALLMARK INFLAMMATORY RESPONSE	0	0	0	0	0	0	0	0	0	0	0	0	1	0	0	0	0	0	1	1	2
2683	B4GALT1	1	1	2683	Gene_ID	H. sapiens	2683	H. sapiens	B4GALT1	beta-1,4-galactosyltransferase 1	GO:0005989 lactose biosynthetic process;GO:0005988 lactose metabolic process;GO:0018146 keratan sulfate biosynthetic process		Enzymes/ENZYME proteins/Transferases	Golgi apparatus(Enhanced)	N-Acetyl-D-glucosamine (Udp-galactosyltransferase activity);6-Aminohexyl-Uridine-C1,5'-Diphosphate (Udp-galactosyltransferase activity);Di(N-Acetyl-D-Glucosamine) (Udp-galactosyltransferase activity);Galactose-uridine-5'-diphosphate (Udp-galactosyltransferase activity);Uridine-5'-Monophosphate (Udp-galactosyltransferase activity);2-(N-Morpholino)-Ethanesulfonic Acid (Udp-galactosyltransferase act…		(M5916)HALLMARK APICAL SURFACE; (M5908)HALLMARK ANDROGEN RESPONSE; (M5915)HALLMARK APICAL JUNCTION	0	0	0	0	0	0	0	0	0	0	0	0	1	0	0	0	0	0	0	0	2
57650	KIAA1524	1	1	57650	Gene_ID	H. sapiens	57650	H. sapiens	CIP2A	cellular inhibitor of PP2A	GO:2000179 positive regulation of neural precursor cell proliferation;GO:2000177 regulation of neural precursor cell proliferation;GO:0007283 spermatogenesis			Cytosol;Plasma membrane(Supported)				0	0	0	0	0	0	0	0	0	0	0	0	0	0	0	0	0	0	0	0	2
6387	CXCL12	1	1	6387	Gene_ID	H. sapiens	6387	H. sapiens	CXCL12	C-X-C motif chemokine ligand 12	GO:0048842 positive regulation of axon extension involved in axon guidance;GO:1903237 negative regulation of leukocyte tethering or rolling;GO:0033603 positive regulation of dopamine secretion				Tinzaparin	(M165)PID SYNDECAN 4 PATHWAY; (M255)PID HIF1 TFPATHWAY; (M124)PID CXCR4 PATHWAY	(M5906)HALLMARK ESTROGEN RESPONSE EARLY; (M5930)HALLMARK EPITHELIAL MESENCHYMAL TRANSITION; (M5907)HALLMARK ESTROGEN RESPONSE LATE	0	0	0	0	0	1	0	0	0	1	0	0	1	0	0	0	0	0	1	1	2
2650	GCNT1	1	1	2650	Gene_ID	H. sapiens	2650	H. sapiens	GCNT1	glucosaminyl (N-acetyl) transferase 1	GO:0050901 leukocyte tethering or rolling;GO:0016266 O-glycan processing;GO:0060352 cell adhesion molecule production		Enzymes/ENZYME proteins/Transferases	Nuclear speckles(Supported)			(M5942)HALLMARK UV RESPONSE DN; (M5950)HALLMARK ALLOGRAFT REJECTION	0	0	0	0	0	0	0	0	0	0	0	0	0	0	0	0	0	0	0	0	2
348235	SKA2	1	1	348235	Gene_ID	H. sapiens	348235	H. sapiens	SKA2	spindle and kinetochore associated complex subunit 2	GO:0031110 regulation of microtubule polymerization or depolymerization;GO:0031109 microtubule polymerization or depolymerization;GO:0070507 regulation of microtubule cytoskeleton organization							1	1	0	0	0	1	0	0	0	0	0	0	0	0	0	0	0	0	0	0	2
10486	CAP2	1	1	10486	Gene_ID	H. sapiens	10486	H. sapiens	CAP2	cyclase associated actin cytoskeleton regulatory protein 2	GO:0045761 regulation of adenylate cyclase activity;GO:0007190 activation of adenylate cyclase activity;GO:0031279 regulation of cyclase activity			Cytosol;Nucleoplasm;Plasma membrane(Approved)			(M5942)HALLMARK UV RESPONSE DN; (M5930)HALLMARK EPITHELIAL MESENCHYMAL TRANSITION	0	0	0	0	0	1	0	0	0	0	0	0	0	0	0	0	0	0	0	0	2
147372	CCBE1	1	1	147372	Gene_ID	H. sapiens	147372	H. sapiens	CCBE1	collagen and calcium binding EGF domains 1	GO:1901492 positive regulation of lymphangiogenesis;GO:1901490 regulation of lymphangiogenesis;GO:1900748 positive regulation of vascular endothelial growth factor signaling pathway			Cytosol;Plasma membrane(Enhanced)		(M5883)NABA SECRETED FACTORS; (M5885)NABA MATRISOME ASSOCIATED; (M5889)NABA MATRISOME		0	0	0	0	0	0	0	0	0	0	0	0	1	0	0	0	0	0	0	0	2
3985	LIMK2	1	1	3985	Gene_ID	H. sapiens	3985	H. sapiens	LIMK2	LIM domain kinase 2	GO:0061303 cornea development in camera-type eye;GO:0030953 astral microtubule organization;GO:0031122 cytoplasmic microtubule organization	TKL Ser/Thr protein kinase family	Enzymes/{ENZYME proteins/Transferases,Kinases/TKL Ser/Thr protein kinases}	Cytosol;Nucleoplasm(Supported)		(M12)PID RHOA PATHWAY; (M81)PID CDC42 PATHWAY		1	1	0	0	0	1	0	0	0	0	0	0	0	0	0	0	0	0	0	1	2
9582	APOBEC3B	1	1	9582	Gene_ID	H. sapiens	9582	H. sapiens	APOBEC3B	apolipoprotein B mRNA editing enzyme catalytic subunit 3B	GO:0045869 negative regulation of single stranded viral RNA replication via double stranded DNA intermediate;GO:0009972 cytidine deamination;GO:0006216 cytidine catabolic process			Nucleoplasm(Approved)				0	0	0	0	0	0	0	0	0	0	0	0	0	0	0	0	0	0	0	0	2
9411	ARHGAP29	1	1	9411	Gene_ID	H. sapiens	9411	H. sapiens	ARHGAP29	Rho GTPase activating protein 29	GO:0007266 Rho protein signal transduction;GO:0043547 positive regulation of GTPase activity;GO:0051056 regulation of small GTPase mediated signal transduction			Centrosome;Cytosol;Nucleus;Plasma membrane(Approved)			(M5893)HALLMARK MITOTIC SPINDLE	1	0	0	0	0	0	0	0	0	0	0	0	0	0	0	0	0	0	0	0	2
55165	CEP55	1	1	55165	Gene_ID	H. sapiens	55165	H. sapiens	CEP55	centrosomal protein 55	GO:0061952 midbody abscission;GO:0007080 mitotic metaphase plate congression;GO:1902410 mitotic cytokinetic process			Microtubule organizing center;Midbody(Supported)Plasma membrane(Approved)				0	1	0	0	0	0	0	0	0	0	0	0	0	0	0	0	1	0	0	0	2
10602	CDC42EP3	1	1	10602	Gene_ID	H. sapiens	10602	H. sapiens	CDC42EP3	CDC42 effector protein 3	GO:0031274 positive regulation of pseudopodium assembly;GO:0031272 regulation of pseudopodium assembly;GO:0031269 pseudopodium assembly			Actin filaments;Plasma membrane(Supported)				0	0	0	0	0	1	0	0	0	0	0	0	0	0	0	0	0	0	0	1	2
1606	DGKA	1	1	1606	Gene_ID	H. sapiens	1606	H. sapiens	DGKA	diacylglycerol kinase alpha	GO:0006654 phosphatidic acid biosynthetic process;GO:0046339 diacylglycerol metabolic process;GO:0046473 phosphatidic acid metabolic process		Enzymes/ENZYME proteins/Transferases	Mitochondria;Nucleoplasm;Vesicles(Approved)	Vitamin E (Phospholipid binding)	(M60)PID NFAT TFPATHWAY	(M5939)HALLMARK P53 PATHWAY	0	0	0	0	0	0	0	0	0	0	0	0	0	0	0	0	0	1	0	0	2
11332	ACOT7	1	1	11332	Gene_ID	H. sapiens	11332	H. sapiens	ACOT7	acyl-CoA thioesterase 7	GO:0036114 medium-chain fatty-acyl-CoA catabolic process;GO:0036116 long-chain fatty-acyl-CoA catabolic process;GO:0036115 fatty-acyl-CoA catabolic process		Enzymes/ENZYME proteins/Hydrolases	Cytosol(Supported)Nucleoplasm(Approved)				0	0	0	0	0	0	0	0	0	0	0	0	0	0	0	0	0	0	0	0	2
84790	TUBA1C	1	1	84790	Gene_ID	H. sapiens	84790	H. sapiens	TUBA1C	tubulin alpha 1c	GO:0030705 cytoskeleton-dependent intracellular transport;GO:0000226 microtubule cytoskeleton organization;GO:0051301 cell division			Microtubules(Supported)	Epothilone D (Structural molecule activity);Epothilone B (Structural molecule activity);CYT997 (Structural molecule activity);2-MERCAPTO-N-[1,2,3,10-TETRAMETHOXY-9-OXO-5,6,7,9-TETRAHYDRO-BENZO[A]HEPTALEN-7-YL]ACETAMIDE (Structural molecule activity)			1	1	0	0	0	0	0	0	0	0	0	1	0	0	0	0	0	1	0	0	2
5587	PRKD1	0	1	5587	Gene_ID	H. sapiens	5587	H. sapiens	PRKD1	protein kinase D1	GO:0038033 positive regulation of endothelial cell chemotaxis by VEGF-activated vascular endothelial growth factor receptor signaling pathway;GO:1901727 positive regulation of histone deacetylase activity;GO:2001028 positive regulation of endothelial cell chemotaxis	CAMK Ser/Thr protein kinase family	Enzymes/{ENZYME proteins/Transferases,Kinases/CAMK Ser/Thr protein kinases}	Cytosol;Plasma membrane(Supported)		(M125)PID IGF1 PATHWAY; (M12645)ST GA13 PATHWAY; (M15)PID LYSOPHOSPHOLIPID PATHWAY		0	0	0	0	0	1	0	1	0	0	0	0	1	0	1	0	0	0	0	1	1
284273	ZADH2	0	1	284273	Gene_ID	H. sapiens	284273	H. sapiens	ZADH2	zinc binding alcohol dehydrogenase domain containing 2	GO:0006693 prostaglandin metabolic process;GO:0006692 prostanoid metabolic process;GO:0045599 negative regulation of fat cell differentiation		Enzymes/ENZYME proteins/Oxidoreductases	Golgi apparatus;Nucleus;Vesicles(Approved)				0	0	0	0	0	0	0	0	0	0	0	0	0	0	0	0	0	0	0	0	1
1058	CENPA	1	0	1058	Gene_ID	H. sapiens	1058	H. sapiens	CENPA	centromere protein A	GO:0034080 CENP-A containing nucleosome assembly;GO:0006336 DNA replication-independent nucleosome assembly;GO:0051382 kinetochore assembly			Nucleoplasm(Supported)		(M242)PID AURORA A PATHWAY; (M14)PID AURORA B PATHWAY; (M176)PID FOXM1 PATHWAY	(M5937)HALLMARK GLYCOLYSIS; (M5901)HALLMARK G2M CHECKPOINT	1	1	0	0	1	0	0	0	1	0	0	0	0	1	0	0	1	0	0	0	1
10979	FERMT2	0	1	10979	Gene_ID	H. sapiens	10979	H. sapiens	FERMT2	fermitin family member 2	GO:0048041 focal adhesion assembly;GO:0033622 integrin activation;GO:0007045 cell-substrate adherens junction assembly			Focal adhesion sites;Nucleoplasm(Supported)			(M5930)HALLMARK EPITHELIAL MESENCHYMAL TRANSITION	0	0	0	0	0	0	0	0	0	0	0	0	0	0	0	0	0	0	0	1	1
131566	DCBLD2	0	1	131566	Gene_ID	H. sapiens	131566	H. sapiens	DCBLD2	discoidin, CUB and LCCL domain containing 2	GO:0030308 negative regulation of cell growth;GO:0045926 negative regulation of growth;GO:0030522 intracellular receptor signaling pathway			Cytosol;Golgi apparatus;Plasma membrane(Approved)			(M5916)HALLMARK APICAL SURFACE; (M5932)HALLMARK INFLAMMATORY RESPONSE; (M5953)HALLMARK KRAS SIGNALING UP	0	0	0	0	0	0	0	0	0	0	0	0	0	0	0	0	0	0	0	0	1
989	SEPT7	0	1	989	Gene_ID	H. sapiens	989	H. sapiens	SEPTIN7	septin 7	GO:1902857 positive regulation of non-motile cilium assembly;GO:1902855 regulation of non-motile cilium assembly;GO:0016476 regulation of embryonic cell shape			Actin filaments(Enhanced)Midbody(Supported)Nucleoli(Approved)				0	1	1	0	0	1	0	0	0	0	0	0	0	0	0	0	1	0	0	1	1
94056	SYAP1	0	1	94056	Gene_ID	H. sapiens	94056	H. sapiens	SYAP1	synapse associated protein 1	GO:1990314 cellular response to insulin-like growth factor stimulus;GO:0036120 cellular response to platelet-derived growth factor stimulus;GO:0038203 TORC2 signaling			Golgi apparatus(Enhanced)Cytosol;Nucleoplasm(Supported)				0	0	0	0	0	0	0	0	0	0	0	0	0	0	0	0	0	0	0	0	1
84296	GINS4	1	0	84296	Gene_ID	H. sapiens	84296	H. sapiens	GINS4	GINS complex subunit 4	GO:0001833 inner cell mass cell proliferation;GO:0001832 blastocyst growth;GO:0000727 double-strand break repair via break-induced replication			Nucleoplasm(Supported)Centrosome(Approved)			(M5925)HALLMARK E2F TARGETS	1	0	0	1	1	0	0	0	0	0	0	0	0	0	0	0	0	0	0	0	1
54433	GAR1	0	1	54433	Gene_ID	H. sapiens	54433	H. sapiens	GAR1	GAR1 ribonucleoprotein	GO:0000454 snoRNA guided rRNA pseudouridine synthesis;GO:0031118 rRNA pseudouridine synthesis;GO:0007004 telomere maintenance via telomerase			Nucleoli fibrillar center(Supported)Nucleus(Approved)				1	0	0	0	0	0	0	0	0	0	0	0	0	1	0	0	0	0	0	0	1
56938	ARNTL2	0	1	56938	Gene_ID	H. sapiens	56938	H. sapiens	ARNTL2	aryl hydrocarbon receptor nuclear translocator like 2	GO:0042753 positive regulation of circadian rhythm;GO:0009649 entrainment of circadian clock;GO:0042752 regulation of circadian rhythm		Transcription factors/Basic domains	Nucleoli;Nucleus(Enhanced)				0	0	0	0	0	0	0	0	0	0	0	0	0	0	0	0	0	0	0	0	1
10093	ARPC4	0	1	10093	Gene_ID	H. sapiens	10093	H. sapiens	ARPC4	actin related protein 2/3 complex subunit 4	GO:0034314 Arp2/3 complex-mediated actin nucleation;GO:0038096 Fc-gamma receptor signaling pathway involved in phagocytosis;GO:0045010 actin nucleation				N-[2-(2-methyl-1H-indol-3-yl)ethyl]thiophene-2-carboxamide (Structural constituent of cytoskeleton);(2S)-2-(3-bromophenyl)-3-(5-chloro-2-hydroxyphenyl)-1,3-thiazolidin-4-one (Structural constituent of cytoskeleton)	(M278)PID RAC1 PATHWAY; (M81)PID CDC42 PATHWAY; (M164)PID ERBB1 DOWNSTREAM PATHWAY		1	0	0	0	0	1	0	0	0	0	0	0	0	0	0	0	0	0	0	0	1
50804	MYEF2	0	1	50804	Gene_ID	H. sapiens	50804	H. sapiens	MYEF2	myelin expression factor 2	GO:2000815 regulation of mRNA stability involved in response to oxidative stress;GO:0010610 regulation of mRNA stability involved in response to stress;GO:0043488 regulation of mRNA stability			Nucleoplasm(Supported)		(M15743)ST GA12 PATHWAY; (M12012)ST P38 MAPK PATHWAY; (M3721)ST JNK MAPK PATHWAY		0	0	0	0	0	0	0	0	0	0	0	0	0	0	0	0	0	0	0	0	1
5558	PRIM2	0	1	5558	Gene_ID	H. sapiens	5558	H. sapiens	PRIM2	DNA primase subunit 2	GO:0032201 telomere maintenance via semi-conservative replication;GO:0006269 DNA replication, synthesis of RNA primer;GO:0033260 nuclear DNA replication			Nucleoplasm(Supported)			(M5925)HALLMARK E2F TARGETS; (M5901)HALLMARK G2M CHECKPOINT	1	0	1	1	0	0	0	0	0	0	0	0	0	1	0	0	0	0	0	0	1
113174	SAAL1	0	1	113174	Gene_ID	H. sapiens	113174	H. sapiens	SAAL1	serum amyloid A like 1				Nucleoplasm(Supported)				0	0	0	0	0	0	0	0	0	0	0	0	0	0	0	0	0	0	0	0	1
8974	P4HA2	0	1	8974	Gene_ID	H. sapiens	8974	H. sapiens	P4HA2	prolyl 4-hydroxylase subunit alpha 2	GO:0018401 peptidyl-proline hydroxylation to 4-hydroxy-L-proline;GO:0019471 4-hydroxyproline metabolic process;GO:0019511 peptidyl-proline hydroxylation		Enzymes/ENZYME proteins/Oxidoreductases	Endoplasmic reticulum(Enhanced)Vesicles(Supported)	Succinic acid (Procollagen-proline 4-dioxygenase activity);L-Proline (Procollagen-proline 4-dioxygenase activity)	(M3468)NABA ECM REGULATORS; (M5885)NABA MATRISOME ASSOCIATED; (M5889)NABA MATRISOME	(M5937)HALLMARK GLYCOLYSIS; (M5945)HALLMARK HEME METABOLISM; (M5891)HALLMARK HYPOXIA	0	0	0	0	0	0	0	0	0	0	0	0	0	0	0	0	0	0	0	0	1
18	ABAT	1	0	18	Gene_ID	H. sapiens	18	H. sapiens	ABAT	4-aminobutyrate aminotransferase	GO:1904450 positive regulation of aspartate secretion;GO:1904448 regulation of aspartate secretion;GO:0014053 negative regulation of gamma-aminobutyric acid secretion		Enzymes/ENZYME proteins/Transferases	Mitochondria(Supported)	Pyridoxal Phosphate (Succinate-semialdehyde dehydrogenase binding);Pyruvic acid (Succinate-semialdehyde dehydrogenase binding);L-Glutamic Acid (Succinate-semialdehyde dehydrogenase binding);L-Alanine (Succinate-semialdehyde dehydrogenase binding);Valproic Acid (Succinate-semialdehyde dehydrogenase binding);Phenelzine (Succinate-semialdehyde dehydrogenase binding);Vigabatrin (Succinate-semialdehyd…		(M5906)HALLMARK ESTROGEN RESPONSE EARLY; (M5939)HALLMARK P53 PATHWAY	0	0	0	0	0	0	0	0	0	0	0	0	0	0	0	0	0	0	1	0	1
221749	PXDC1	0	1	221749	Gene_ID	H. sapiens	221749	H. sapiens	PXDC1	PX domain containing 1				Plasma membrane(Approved)				0	0	0	0	0	0	0	0	0	0	0	0	0	0	0	0	0	0	0	0	1
55367	PIDD1	1	0	55367	Gene_ID	H. sapiens	55367	H. sapiens	PIDD1	p53-induced death domain protein 1	GO:0006977 DNA damage response, signal transduction by p53 class mediator resulting in cell cycle arrest;GO:0072431 signal transduction involved in mitotic G1 DNA damage checkpoint;GO:0031571 mitotic G1 DNA damage checkpoint			Cytosol(Supported)Golgi apparatus(Approved)		(M220)PID CASPASE PATHWAY; (M145)PID P53 DOWNSTREAM PATHWAY	(M5939)HALLMARK P53 PATHWAY	0	0	1	0	0	0	0	0	0	0	1	0	0	0	0	0	0	0	0	0	1
3091	HIF1A	0	1	3091	Gene_ID	H. sapiens	3091	H. sapiens	HIF1A	hypoxia inducible factor 1 subunit alpha	GO:0021502 neural fold elevation formation;GO:0070101 positive regulation of chemokine-mediated signaling pathway;GO:1903377 negative regulation of oxidative stress-induced neuron intrinsic apoptotic signaling pathway		Transcription factors/Basic domains	Nuclear bodies;Nucleoplasm(Supported)Plasma membrane(Approved)	Carvedilol (Ubiquitin protein ligase binding);2-Methoxyestradiol (Ubiquitin protein ligase binding);N-[(1-CHLORO-4-HYDROXYISOQUINOLIN-3-YL)CARBONYL]GLYCINE (Ubiquitin protein ligase binding)	(M180)PID HIF1A PATHWAY; (M226)PID VEGFR1 PATHWAY; (M288)PID HES HEY PATHWAY	(M5932)HALLMARK INFLAMMATORY RESPONSE; (M5913)HALLMARK INTERFERON GAMMA RESPONSE; (M5901)HALLMARK G2M CHECKPOINT	0	0	0	0	0	1	0	0	0	1	0	0	1	0	0	0	0	0	0	1	1
89795	NAV3	0	1	89795	Gene_ID	H. sapiens	89795	H. sapiens	NAV3	neuron navigator 3	GO:1905929 positive regulation of invadopodium disassembly;GO:1905927 regulation of invadopodium disassembly;GO:1905878 invadopodium disassembly			Cytosol;Nuclear membrane(Approved)				0	0	0	0	0	1	0	0	0	0	0	0	0	0	1	0	0	0	0	1	1
3671	ISLR	1	0	3671	Gene_ID	H. sapiens	3671	H. sapiens	ISLR	immunoglobulin superfamily containing leucine rich repeat	GO:0002576 platelet degranulation;GO:0045055 regulated exocytosis;GO:0006887 exocytosis			Golgi apparatus;Plasma membrane(Approved)				0	0	0	0	0	0	0	0	0	0	0	0	0	0	0	0	0	1	0	0	1
26292	MYCBP	0	1	26292	Gene_ID	H. sapiens	26292	H. sapiens	MYCBP	MYC binding protein	GO:0007283 spermatogenesis;GO:0048232 male gamete generation;GO:0007276 gamete generation					(M17)PID NOTCH PATHWAY		0	0	0	0	0	0	0	0	0	0	0	0	0	0	0	0	0	0	0	0	1
55276	PGM2	0	1	55276	Gene_ID	H. sapiens	55276	H. sapiens	PGM2	phosphoglucomutase 2	GO:0006098 pentose-phosphate shunt;GO:0005980 glycogen catabolic process;GO:0019388 galactose catabolic process		Enzymes/ENZYME proteins/Isomerase	Intermediate filaments(Approved)			(M5937)HALLMARK GLYCOLYSIS; (M5891)HALLMARK HYPOXIA	0	0	0	0	0	0	0	0	0	0	0	0	0	0	0	0	0	0	0	0	1
4958	OMD	0	1	4958	Gene_ID	H. sapiens	4958	H. sapiens	OMD	osteomodulin	GO:0042340 keratan sulfate catabolic process;GO:0018146 keratan sulfate biosynthetic process;GO:0042339 keratan sulfate metabolic process			Endoplasmic reticulum;Nucleoli fibrillar center(Approved)		(M5882)NABA PROTEOGLYCANS; (M5884)NABA CORE MATRISOME; (M5889)NABA MATRISOME	(M5905)HALLMARK ADIPOGENESIS	0	0	0	0	0	0	0	0	0	0	0	0	0	0	0	0	0	0	0	0	1
4288	MKI67	1	0	4288	Gene_ID	H. sapiens	4288	H. sapiens	MKI67	marker of proliferation Ki-67	GO:0007088 regulation of mitotic nuclear division;GO:1902275 regulation of chromatin organization;GO:0051983 regulation of chromosome segregation			Nuclear bodies;Nucleoli;Nucleus(Enhanced)			(M5925)HALLMARK E2F TARGETS; (M5901)HALLMARK G2M CHECKPOINT	0	1	1	0	0	0	0	1	0	0	0	0	0	0	0	0	0	0	0	0	1
158056	MAMDC4	1	0	158056	Gene_ID	H. sapiens	158056	H. sapiens	MAMDC4	MAM domain containing 4	GO:0015031 protein transport;GO:0015833 peptide transport;GO:0042886 amide transport			Cytosol;Nucleoplasm(Approved)				0	0	0	0	0	0	0	0	0	0	0	0	0	0	0	0	0	0	0	0	1
55133	SRBD1	0	1	55133	Gene_ID	H. sapiens	55133	H. sapiens	SRBD1	S1 RNA binding domain 1	GO:0006412 translation;GO:0043043 peptide biosynthetic process;GO:0043604 amide biosynthetic process			Cytosol;Mitochondria(Approved)				0	0	0	0	0	0	0	0	0	0	0	0	0	0	0	0	0	0	0	0	1
157506	RDH10	1	0	157506	Gene_ID	H. sapiens	157506	H. sapiens	RDH10	retinol dehydrogenase 10	GO:1900054 positive regulation of retinoic acid biosynthetic process;GO:1900052 regulation of retinoic acid biosynthetic process;GO:0060431 primary lung bud formation		Enzymes/ENZYME proteins/Oxidoreductases	Lipid droplets(Approved)				0	0	0	0	0	0	0	0	0	0	0	0	0	0	0	0	0	0	0	0	1
3688	ITGB1	0	1	3688	Gene_ID	H. sapiens	3688	H. sapiens	ITGB1	integrin subunit beta 1	GO:0021943 formation of radial glial scaffolds;GO:0007161 calcium-independent cell-matrix adhesion;GO:0021932 hindbrain radial glia guided cell migration		CD markers;Transporters	Focal adhesion sites;Plasma membrane(Supported)Endoplasmic reticulum(Approved)	Anti-thymocyte Globulin (Rabbit) (Virus receptor activity)	(M11)PID PRL SIGNALING EVENTS PATHWAY; (M118)PID INTEGRIN A9B1 PATHWAY; (M274)PID LYMPH ANGIOGENESIS PATHWAY	(M5909)HALLMARK MYOGENESIS; (M5915)HALLMARK APICAL JUNCTION; (M5930)HALLMARK EPITHELIAL MESENCHYMAL TRANSITION	1	0	1	0	0	1	0	0	0	0	0	0	1	0	0	0	0	1	0	1	1
89958	SAPCD2	1	0	89958	Gene_ID	H. sapiens	89958	H. sapiens	SAPCD2	suppressor APC domain containing 2	GO:1904777 negative regulation of protein localization to cell cortex;GO:1904776 regulation of protein localization to cell cortex;GO:0098725 symmetric cell division			Cytosol;Nucleoli;Nucleus(Supported)				0	1	0	0	0	0	0	0	0	0	0	0	0	0	0	0	0	0	0	0	1
89853	MVB12B	0	1	89853	Gene_ID	H. sapiens	89853	H. sapiens	MVB12B	multivesicular body subunit 12B	GO:0019075 virus maturation;GO:0046755 viral budding;GO:0075733 intracellular transport of virus			Golgi apparatus;Vesicles(Approved)				0	0	0	0	0	0	0	0	0	0	0	0	0	0	0	0	0	0	0	0	1
5885	RAD21	0	1	5885	Gene_ID	H. sapiens	5885	H. sapiens	RAD21	RAD21 cohesin complex component	GO:0045841 negative regulation of mitotic metaphase/anaphase transition;GO:0045876 positive regulation of sister chromatid cohesion;GO:0030071 regulation of mitotic metaphase/anaphase transition			Nucleoplasm(Enhanced)			(M5925)HALLMARK E2F TARGETS; (M5901)HALLMARK G2M CHECKPOINT	1	1	1	1	1	1	0	1	0	0	1	1	0	0	1	1	0	0	0	0	1
1290	COL5A2	1	0	1290	Gene_ID	H. sapiens	1290	H. sapiens	COL5A2	collagen type V alpha 2 chain	GO:1903225 negative regulation of endodermal cell differentiation;GO:1903224 regulation of endodermal cell differentiation;GO:2000542 negative regulation of gastrulation					(M3005)NABA COLLAGENS; (M198)PID SYNDECAN 1 PATHWAY; (M18)PID INTEGRIN1 PATHWAY	(M5944)HALLMARK ANGIOGENESIS; (M5942)HALLMARK UV RESPONSE DN; (M5930)HALLMARK EPITHELIAL MESENCHYMAL TRANSITION	0	0	0	0	0	1	0	0	0	0	0	0	0	0	0	0	0	0	0	0	1
174	AFP	0	1	174	Gene_ID	H. sapiens	174	H. sapiens	AFP	alpha fetoprotein	GO:0001542 ovulation from ovarian follicle;GO:0042448 progesterone metabolic process;GO:0030728 ovulation			Cytosol(Uncertain)		(M106)PID HNF3B PATHWAY; (M19)PID P73PATHWAY; (M115)PID REG GR PATHWAY		0	0	0	0	0	0	0	0	0	0	0	0	0	0	0	0	0	0	0	0	1
126820	WDR63	1	0	126820	Gene_ID	H. sapiens	126820	H. sapiens	WDR63	WD repeat domain 63	GO:0036159 inner dynein arm assembly;GO:0060294 cilium movement involved in cell motility;GO:0070286 axonemal dynein complex assembly							0	1	0	0	0	0	0	0	0	0	0	1	0	0	0	0	0	0	0	0	1
55635	DEPDC1	1	0	55635	Gene_ID	H. sapiens	55635	H. sapiens	DEPDC1	DEP domain containing 1	GO:0043547 positive regulation of GTPase activity;GO:0043087 regulation of GTPase activity;GO:0045892 negative regulation of transcription, DNA-templated			Nucleoli fibrillar center;Nucleus(Supported)			(M5937)HALLMARK GLYCOLYSIS; (M5925)HALLMARK E2F TARGETS	0	0	0	0	0	0	0	0	0	0	0	0	0	0	0	0	0	0	0	0	1
2595	GANC	1	0	2595	Gene_ID	H. sapiens	2595	H. sapiens	GANC	glucosidase alpha, neutral C	GO:0000023 maltose metabolic process;GO:0005984 disaccharide metabolic process;GO:0009311 oligosaccharide metabolic process		Enzymes/ENZYME proteins/Hydrolases	Actin filaments;Nucleoplasm(Approved)	Miglitol (Maltose alpha-glucosidase activity)			0	0	0	0	0	0	0	0	0	0	0	0	0	0	0	0	0	0	0	0	1
79056	PRRG4	0	1	79056	Gene_ID	H. sapiens	79056	H. sapiens	PRRG4	proline rich and Gla domain 4	GO:0008150 biological_process			Golgi apparatus(Approved)				0	0	0	0	0	0	0	0	0	0	0	0	0	0	0	0	0	0	0	0	1
54521	WDR44	0	1	54521	Gene_ID	H. sapiens	54521	H. sapiens	WDR44	WD repeat domain 44				Golgi apparatus(Supported)				0	0	0	0	0	0	0	0	0	0	0	0	0	0	0	0	0	0	0	0	1
440034	DKFZp686K1684	0	1	440034	Gene_ID	H. sapiens	440034	H. sapiens	PAX6-AS1	PAX6 antisense RNA 1								0	0	0	0	0	0	0	0	0	0	0	0	0	0	0	0	0	0	0	0	1
7360	UGP2	0	1	7360	Gene_ID	H. sapiens	7360	H. sapiens	UGP2	UDP-glucose pyrophosphorylase 2	GO:0006065 UDP-glucuronate biosynthetic process;GO:0046398 UDP-glucuronate metabolic process;GO:0019255 glucose 1-phosphate metabolic process		Enzymes/ENZYME proteins/Transferases	Centrosome;Mitochondria;Nucleoplasm(Approved)			(M5937)HALLMARK GLYCOLYSIS; (M5891)HALLMARK HYPOXIA	0	0	0	0	0	0	0	0	0	0	0	0	0	0	0	0	0	0	0	0	1
5332	PLCB4	0	1	5332	Gene_ID	H. sapiens	5332	H. sapiens	PLCB4	phospholipase C beta 4	GO:0051209 release of sequestered calcium ion into cytosol;GO:0097553 calcium ion transmembrane import into cytosol;GO:0032959 inositol trisphosphate biosynthetic process		Enzymes/ENZYME proteins/Hydrolases	Microtubules;Nucleoplasm(Approved)		(M18342)ST G ALPHA I PATHWAY	(M5942)HALLMARK UV RESPONSE DN	0	0	0	0	0	0	0	0	0	0	0	0	0	0	0	0	0	0	0	0	1
407043	MIR7-1	0	1	407043	Gene_ID	H. sapiens	407043	H. sapiens	MIR7-1	microRNA 7-1								0	0	0	0	0	0	0	0	0	0	0	0	0	0	0	0	0	0	0	0	1
6272	SORT1	0	1	6272	Gene_ID	H. sapiens	6272	H. sapiens	SORT1	sortilin 1	GO:0051005 negative regulation of lipoprotein lipase activity;GO:0006622 protein targeting to lysosome;GO:0038180 nerve growth factor signaling pathway			Cytosol;Golgi apparatus;Plasma membrane(Approved)		(M153)PID P75 NTR PATHWAY		0	0	0	0	0	0	0	0	0	0	0	0	0	0	0	0	0	0	0	0	1
153527	ZMAT2	0	1	153527	Gene_ID	H. sapiens	153527	H. sapiens	ZMAT2	zinc finger matrin-type 2	GO:0000398 mRNA splicing, via spliceosome;GO:0000377 RNA splicing, via transesterification reactions with bulged adenosine as nucleophile;GO:0000375 RNA splicing, via transesterification reactions			Mitochondria;Nucleus(Approved)				0	0	0	0	0	0	0	0	0	0	0	0	0	0	0	0	0	0	0	0	1
84795	PYROXD2	1	0	84795	Gene_ID	H. sapiens	84795	H. sapiens	PYROXD2	pyridine nucleotide-disulphide oxidoreductase domain 2	GO:0055114 oxidation-reduction process;GO:0008152 metabolic process;GO:0008150 biological_process			Mitochondria(Approved)				0	0	0	0	0	0	0	0	0	0	0	0	0	0	0	0	0	0	0	0	1
440145	MZT1	0	1	440145	Gene_ID	H. sapiens	440145	H. sapiens	MZT1	mitotic spindle organizing protein 1	GO:0051415 microtubule nucleation by interphase microtubule organizing center;GO:0051418 microtubule nucleation by microtubule organizing center;GO:0033566 gamma-tubulin complex localization							1	1	0	0	0	1	0	0	0	0	0	0	0	0	0	0	0	0	0	0	1
22948	CCT5	0	1	22948	Gene_ID	H. sapiens	22948	H. sapiens	CCT5	chaperonin containing TCP1 subunit 5	GO:1904871 positive regulation of protein localization to Cajal body;GO:1904869 regulation of protein localization to Cajal body;GO:1904874 positive regulation of telomerase RNA localization to Cajal body			Cytosol(Supported)Nucleoli(Approved)			(M5926)HALLMARK MYC TARGETS V1	0	0	0	0	0	1	0	1	0	1	0	1	0	0	0	0	0	0	0	0	1
10733	PLK4	1	0	10733	Gene_ID	H. sapiens	10733	H. sapiens	PLK4	polo like kinase 4	GO:0046601 positive regulation of centriole replication;GO:0098535 de novo centriole assembly involved in multi-ciliated epithelial cell differentiation;GO:0010825 positive regulation of centrosome duplication	Other	Enzymes/{ENZYME proteins/Transferases,Kinases}	Centrosome(Supported)Cytosol(Approved)			(M5928)HALLMARK MYC TARGETS V2; (M5925)HALLMARK E2F TARGETS; (M5907)HALLMARK ESTROGEN RESPONSE LATE	1	1	1	0	0	1	0	0	0	0	1	1	0	0	0	0	1	0	0	0	1
3434	IFIT1	1	0	3434	Gene_ID	H. sapiens	3434	H. sapiens	IFIT1	interferon induced protein with tetratricopeptide repeats 1	GO:0019060 intracellular transport of viral protein in host cell;GO:0030581 symbiont intracellular protein transport in host;GO:0051708 intracellular protein transport in other organism involved in symbiotic interaction			Cytosol(Supported)			(M5922)HALLMARK UNFOLDED PROTEIN RESPONSE; (M5913)HALLMARK INTERFERON GAMMA RESPONSE	0	0	0	0	0	0	0	0	0	0	0	0	0	0	0	0	0	0	0	0	1
253512	SLC25A30	0	1	253512	Gene_ID	H. sapiens	253512	H. sapiens	SLC25A30	solute carrier family 25 member 30	GO:0006839 mitochondrial transport;GO:0006810 transport;GO:0051234 establishment of localization		Transporters/Electrochemical Potential-driven transporters	Nucleoplasm(Approved)				0	0	0	0	0	0	0	0	0	0	0	0	0	0	0	0	0	0	0	0	1
9928	KIF14	1	0	9928	Gene_ID	H. sapiens	9928	H. sapiens	KIF14	kinesin family member 14	GO:0021685 cerebellar granular layer structural organization;GO:0021693 cerebellar Purkinje cell layer structural organization;GO:0021698 cerebellar cortex structural organization			Cytosol;Midbody ring(Supported)				1	1	1	0	0	1	0	0	0	0	1	1	0	0	0	0	1	0	1	1	1
2187	FANCB	0	1	2187	Gene_ID	H. sapiens	2187	H. sapiens	FANCB	FA complementation group B	GO:1905168 positive regulation of double-strand break repair via homologous recombination;GO:2000042 negative regulation of double-strand break repair via homologous recombination;GO:1990414 replication-born double-strand break repair via sister chromatid exchange					(M1)PID FANCONI PATHWAY		0	0	0	0	1	0	0	0	0	1	0	0	0	0	0	0	0	0	0	0	1
3799	KIF5B	0	1	3799	Gene_ID	H. sapiens	3799	H. sapiens	KIF5B	kinesin family member 5B	GO:1905152 positive regulation of voltage-gated sodium channel activity;GO:1990049 retrograde neuronal dense core vesicle transport;GO:1990048 anterograde neuronal dense core vesicle transport			Cytosol(Enhanced)Microtubule organizing center(Supported)		(M266)PID NCADHERIN PATHWAY	(M5922)HALLMARK UNFOLDED PROTEIN RESPONSE; (M5893)HALLMARK MITOTIC SPINDLE; (M5901)HALLMARK G2M CHECKPOINT	1	0	0	0	0	1	0	0	0	0	0	0	0	0	0	0	0	1	0	1	1
55754	TMEM30A	0	1	55754	Gene_ID	H. sapiens	55754	H. sapiens	TMEM30A	transmembrane protein 30A	GO:0015917 aminophospholipid transport;GO:0070863 positive regulation of protein exit from endoplasmic reticulum;GO:0070861 regulation of protein exit from endoplasmic reticulum		Transporters/Accessory Factors Involved in Transport	Mitochondria(Supported)				0	0	0	0	0	0	0	0	0	0	0	0	0	0	0	0	0	0	0	1	1
6924	TCEB3	0	1	6924	Gene_ID	H. sapiens	6924	H. sapiens	ELOA	elongin A	GO:0006368 transcription elongation from RNA polymerase II promoter;GO:0006354 DNA-templated transcription, elongation;GO:0006357 regulation of transcription by RNA polymerase II			Nuclear speckles(Supported)Cytosol(Uncertain)			(M5898)HALLMARK DNA REPAIR	0	0	0	0	0	0	0	0	0	0	0	0	0	0	0	0	0	0	0	0	1
51313	FAM198B	0	1	51313	Gene_ID	H. sapiens	51313	H. sapiens	GASK1B	golgi associated kinase 1B				Golgi apparatus;Nucleoli fibrillar center;Nucleoplasm(Approved)				0	0	0	0	0	0	0	0	0	0	0	0	0	0	0	0	0	0	0	0	1
51226	COPZ2	0	1	51226	Gene_ID	H. sapiens	51226	H. sapiens	COPZ2	COPI coat complex subunit zeta 2	GO:0006891 intra-Golgi vesicle-mediated transport;GO:0006890 retrograde vesicle-mediated transport, Golgi to ER;GO:0006888 ER to Golgi vesicle-mediated transport						(M5956)HALLMARK KRAS SIGNALING DN	0	0	0	0	0	0	0	0	0	0	0	0	0	0	0	0	0	0	0	0	1
11064	CNTRL	1	0	11064	Gene_ID	H. sapiens	11064	H. sapiens	CNTRL	centriolin	GO:0097711 ciliary basal body-plasma membrane docking;GO:0010389 regulation of G2/M transition of mitotic cell cycle;GO:1902749 regulation of cell cycle G2/M phase transition			Centrosome(Supported)Cytosol(Approved)			(M5893)HALLMARK MITOTIC SPINDLE	1	1	1	0	0	1	0	0	0	0	0	1	0	0	0	0	0	0	0	0	1
11073	TOPBP1	0	1	11073	Gene_ID	H. sapiens	11073	H. sapiens	TOPBP1	DNA topoisomerase II binding protein 1	GO:0033314 mitotic DNA replication checkpoint;GO:0007095 mitotic G2 DNA damage checkpoint;GO:0044818 mitotic G2/M transition checkpoint			Nucleus(Enhanced)		(M258)PID BARD1 PATHWAY; (M46)PID ATR PATHWAY; (M1)PID FANCONI PATHWAY	(M5951)HALLMARK SPERMATOGENESIS	1	0	1	1	1	0	0	0	0	0	0	1	0	0	0	0	0	0	0	0	1
3764	KCNJ8	0	1	3764	Gene_ID	H. sapiens	3764	H. sapiens	KCNJ8	potassium inwardly rectifying channel subfamily J member 8	GO:0098915 membrane repolarization during ventricular cardiac muscle cell action potential;GO:0086005 ventricular cardiac muscle cell action potential;GO:0086013 membrane repolarization during cardiac muscle cell action potential		Transporters/Transporter channels and pores;Voltage-gated ion channels/Inwardly Rectifying Potassium Channels		Phenformin (Inward rectifier potassium channel activity);Levosimendan (Inward rectifier potassium channel activity);Thiamylal (Inward rectifier potassium channel activity);Gliquidone (Inward rectifier potassium channel activity);Glisoxepide (Inward rectifier potassium channel activity)		(M5944)HALLMARK ANGIOGENESIS	0	0	0	0	0	1	0	0	0	0	0	0	0	0	0	0	0	0	0	0	1
23450	SF3B3	0	1	23450	Gene_ID	H. sapiens	23450	H. sapiens	SF3B3	splicing factor 3b subunit 3	GO:0042177 negative regulation of protein catabolic process;GO:0000398 mRNA splicing, via spliceosome;GO:0000377 RNA splicing, via transesterification reactions with bulged adenosine as nucleophile			Nucleoli;Nucleus(Supported)			(M5926)HALLMARK MYC TARGETS V1	0	0	0	0	0	0	0	0	0	0	0	0	0	0	0	0	0	0	0	0	1
4884	NPTX1	0	1	4884	Gene_ID	H. sapiens	4884	H. sapiens	NPTX1	neuronal pentraxin 1	GO:0060385 axonogenesis involved in innervation;GO:0098962 regulation of postsynaptic neurotransmitter receptor activity;GO:0060384 innervation							0	0	0	0	0	0	0	0	0	0	0	0	0	0	0	0	0	0	0	1	1
56479	KCNQ5	0	1	56479	Gene_ID	H. sapiens	56479	H. sapiens	KCNQ5	potassium voltage-gated channel subfamily Q member 5	GO:0071805 potassium ion transmembrane transport;GO:0071804 cellular potassium ion transport;GO:0006813 potassium ion transport		Voltage-gated ion channels/Voltage-Gated Potassium Channels	Vesicles(Approved)	Ezogabine (Voltage-gated potassium channel activity);ICA-105665 (Voltage-gated potassium channel activity)			0	0	0	0	0	0	0	0	0	0	0	0	0	0	0	0	0	0	0	0	1
9223	MAGI1	0	1	9223	Gene_ID	H. sapiens	9223	H. sapiens	MAGI1	membrane associated guanylate kinase, WW and PDZ domain containing 1	GO:0022409 positive regulation of cell-cell adhesion;GO:0045785 positive regulation of cell adhesion;GO:0022407 regulation of cell-cell adhesion			Cell Junctions;Nucleoplasm(Enhanced)				0	0	0	0	0	0	0	0	0	0	0	0	0	0	0	0	0	0	1	0	1
6611	SMS	0	1	6611	Gene_ID	H. sapiens	6611	H. sapiens	SMS	spermine synthase	GO:0006597 spermine biosynthetic process;GO:0008215 spermine metabolic process;GO:0006596 polyamine biosynthetic process		Enzymes/ENZYME proteins/Transferases	Cytosol;Nuclear bodies(Approved)	Spermine (Spermine synthase activity)		(M5908)HALLMARK ANDROGEN RESPONSE; (M5935)HALLMARK FATTY ACID METABOLISM	0	0	0	0	0	0	0	0	0	0	0	0	0	0	0	0	0	0	0	0	1
4015	LOX	0	1	4015	Gene_ID	H. sapiens	4015	H. sapiens	LOX	lysyl oxidase	GO:0035906 descending aorta development;GO:0035905 ascending aorta development;GO:2000586 regulation of platelet-derived growth factor receptor-beta signaling pathway		Enzymes/ENZYME proteins/Oxidoreductases	Endoplasmic reticulum(Supported)		(M3468)NABA ECM REGULATORS; (M5885)NABA MATRISOME ASSOCIATED; (M5889)NABA MATRISOME	(M5891)HALLMARK HYPOXIA; (M5930)HALLMARK EPITHELIAL MESENCHYMAL TRANSITION	0	0	0	0	0	1	0	0	0	0	0	0	1	0	0	0	0	0	0	1	1
5888	RAD51	0	1	5888	Gene_ID	H. sapiens	5888	H. sapiens	RAD51	RAD51 recombinase	GO:1990426 mitotic recombination-dependent replication fork processing;GO:1990505 mitotic DNA replication maintenance of fidelity;GO:1904631 response to glucoside			Nucleoli(Enhanced)Cytosol;Mitochondria(Supported)	Phosphoaminophosphonic Acid-Adenylate Ester (Single-stranded dna-dependent atpase activity);MP470 (Single-stranded dna-dependent atpase activity)	(M258)PID BARD1 PATHWAY; (M46)PID ATR PATHWAY; (M19)PID P73PATHWAY	(M5898)HALLMARK DNA REPAIR	1	1	1	1	1	0	0	0	0	1	0	0	0	1	0	1	0	0	0	0	1
51108	METTL9	0	1	51108	Gene_ID	H. sapiens	51108	H. sapiens	METTL9	methyltransferase like 9				Cell Junctions;Cytosol;Nucleus(Approved)				0	0	0	0	0	0	0	0	0	0	0	0	0	0	0	0	0	0	0	0	1
998	CDC42	0	1	998	Gene_ID	H. sapiens	998	H. sapiens	CDC42	cell division cycle 42	GO:0060501 positive regulation of epithelial cell proliferation involved in lung morphogenesis;GO:0060661 submandibular salivary gland formation;GO:2000794 regulation of epithelial cell proliferation involved in lung morphogenesis		RAS pathway related proteins	Cytokinetic bridge;Microtubules(Enhanced)	Aminophosphonic Acid-Guanylate Ester (Ubiquitin protein ligase activity);Guanosine-5'-Diphosphate (Ubiquitin protein ligase activity)	(M64)PID S1P S1P4 PATHWAY; (M163)PID LIS1 PATHWAY; (M83)PID CDC42 REG PATHWAY	(M5893)HALLMARK MITOTIC SPINDLE	1	1	1	1	0	1	0	1	0	1	1	0	1	0	1	0	1	1	1	1	1
5817	PVR	0	1	5817	Gene_ID	H. sapiens	5817	H. sapiens	PVR	PVR cell adhesion molecule	GO:0060370 susceptibility to T cell mediated cytotoxicity;GO:0042271 susceptibility to natural killer cell mediated cytotoxicity;GO:0002860 positive regulation of natural killer cell mediated cytotoxicity directed against tumor cell target		CD markers	Plasma membrane(Supported)Nucleoplasm;Vesicles(Approved)	Sphingosine (Virus receptor activity);MYRISTIC ACID (Virus receptor activity)	(M72)PID NECTIN PATHWAY; (M53)PID INTEGRIN3 PATHWAY	(M5932)HALLMARK INFLAMMATORY RESPONSE; (M5930)HALLMARK EPITHELIAL MESENCHYMAL TRANSITION	0	0	0	0	0	0	0	0	0	0	0	0	0	0	0	0	0	0	0	0	1
3912	LAMB1	1	0	3912	Gene_ID	H. sapiens	3912	H. sapiens	LAMB1	laminin subunit beta 1	GO:0021812 neuronal-glial interaction involved in cerebral cortex radial glia guided migration;GO:0021801 cerebral cortex radial glia guided migration;GO:0021799 cerebral cortex radially oriented cell migration					(M158)PID INTEGRIN4 PATHWAY; (M5887)NABA BASEMENT MEMBRANES; (M53)PID INTEGRIN3 PATHWAY		0	0	0	0	0	0	0	0	0	0	0	0	1	0	0	0	0	0	0	1	1
84324	SARNP	0	1	84324	Gene_ID	H. sapiens	84324	H. sapiens	SARNP	SAP domain containing ribonucleoprotein	GO:0006406 mRNA export from nucleus;GO:0071427 mRNA-containing ribonucleoprotein complex export from nucleus;GO:0071426 ribonucleoprotein complex export from nucleus			Nuclear speckles(Supported)				0	0	0	0	0	0	0	0	0	0	0	0	0	0	0	0	0	0	0	0	1
1809	DPYSL3	0	1	1809	Gene_ID	H. sapiens	1809	H. sapiens	DPYSL3	dihydropyrimidinase like 3	GO:0006208 pyrimidine nucleobase catabolic process;GO:0051491 positive regulation of filopodium assembly;GO:0051764 actin crosslink formation			Cytosol(Supported)			(M5930)HALLMARK EPITHELIAL MESENCHYMAL TRANSITION	0	0	0	0	0	1	0	0	0	0	0	0	0	0	1	0	0	0	0	1	1
23306	NEMP1	0	1	23306	Gene_ID	H. sapiens	23306	H. sapiens	NEMP1	nuclear envelope integral membrane protein 1	GO:0008150 biological_process			Nucleoplasm(Approved)				0	0	0	0	0	0	0	0	0	0	0	0	0	0	0	0	0	0	0	0	1
51435	SCARA3	1	0	51435	Gene_ID	H. sapiens	51435	H. sapiens	SCARA3	scavenger receptor class A member 3	GO:0003429 growth plate cartilage chondrocyte morphogenesis;GO:0003414 chondrocyte morphogenesis involved in endochondral bone morphogenesis;GO:0034138 toll-like receptor 3 signaling pathway			Endoplasmic reticulum(Supported)				0	0	0	0	0	0	0	0	0	0	0	0	0	0	0	0	0	0	0	1	1
1844	DUSP2	0	1	1844	Gene_ID	H. sapiens	1844	H. sapiens	DUSP2	dual specificity phosphatase 2	GO:0000188 inactivation of MAPK activity;GO:0043407 negative regulation of MAP kinase activity;GO:0071901 negative regulation of protein serine/threonine kinase activity		Enzymes/ENZYME proteins/Hydrolases	Nuclear membrane;Nucleus(Supported)			(M5928)HALLMARK MYC TARGETS V2; (M5907)HALLMARK ESTROGEN RESPONSE LATE; (M5890)HALLMARK TNFA SIGNALING VIA NFKB	0	0	0	0	0	0	0	0	0	0	0	0	0	0	0	0	0	0	0	0	1
7045	TGFBI	1	0	7045	Gene_ID	H. sapiens	7045	H. sapiens	TGFBI	transforming growth factor beta induced	GO:0002062 chondrocyte differentiation;GO:0007601 visual perception;GO:0001525 angiogenesis					(M169)PID INTEGRIN2 PATHWAY; (M53)PID INTEGRIN3 PATHWAY; (M18)PID INTEGRIN1 PATHWAY	(M5937)HALLMARK GLYCOLYSIS; (M5891)HALLMARK HYPOXIA; (M5915)HALLMARK APICAL JUNCTION	0	0	0	0	0	0	0	0	0	0	0	0	1	0	0	0	0	0	1	0	1
27115	PDE7B	1	0	27115	Gene_ID	H. sapiens	27115	H. sapiens	PDE7B	phosphodiesterase 7B	GO:0006198 cAMP catabolic process;GO:0009214 cyclic nucleotide catabolic process;GO:0009154 purine ribonucleotide catabolic process		Enzymes/ENZYME proteins/Hydrolases	Nucleoplasm(Approved)	Dyphylline (Metal ion binding);Ketotifen (Metal ion binding)			0	0	0	0	0	0	0	0	0	0	0	0	0	0	0	0	0	0	0	0	1
56603	CYP26B1	1	0	56603	Gene_ID	H. sapiens	56603	H. sapiens	CYP26B1	cytochrome P450 family 26 subfamily B member 1	GO:2001037 positive regulation of tongue muscle cell differentiation;GO:2001035 regulation of tongue muscle cell differentiation;GO:1902811 positive regulation of skeletal muscle fiber differentiation			Cytosol(Approved)			(M5906)HALLMARK ESTROGEN RESPONSE EARLY; (M5907)HALLMARK ESTROGEN RESPONSE LATE	0	1	0	0	0	0	0	0	0	0	0	0	0	0	0	1	0	0	0	0	1
23677	SH3BP4	0	1	23677	Gene_ID	H. sapiens	23677	H. sapiens	SH3BP4	SH3 domain binding protein 4	GO:0043090 amino acid import;GO:0061462 protein localization to lysosome;GO:0034260 negative regulation of GTPase activity							0	0	0	0	0	0	0	0	0	0	0	0	0	0	0	0	0	0	0	0	1
145407	C14orf37	1	0	145407	Gene_ID	H. sapiens	145407	H. sapiens	ARMH4	armadillo like helical domain containing 4				Plasma membrane(Approved)				0	0	0	0	0	0	0	0	0	0	0	0	0	0	0	0	0	0	0	0	1
23035	PHLPP2	0	1	23035	Gene_ID	H. sapiens	23035	H. sapiens	PHLPP2	PH domain and leucine rich repeat protein phosphatase 2	GO:0021766 hippocampus development;GO:0051898 negative regulation of protein kinase B signaling;GO:0021543 pallium development		Enzymes/ENZYME proteins/Hydrolases	Vesicles(Approved)				0	0	0	0	0	0	0	0	0	0	0	0	0	0	0	0	0	0	0	0	1
23654	PLXNB2	1	0	23654	Gene_ID	H. sapiens	23654	H. sapiens	PLXNB2	plexin B2	GO:1902287 semaphorin-plexin signaling pathway involved in axon guidance;GO:1902285 semaphorin-plexin signaling pathway involved in neuron projection guidance;GO:0001843 neural tube closure					(M5880)NABA ECM AFFILIATED; (M5885)NABA MATRISOME ASSOCIATED; (M5889)NABA MATRISOME	(M5909)HALLMARK MYOGENESIS; (M5939)HALLMARK P53 PATHWAY	0	0	0	0	0	0	0	0	0	0	0	0	0	0	0	0	0	0	1	1	1
1907	EDN2	0	1	1907	Gene_ID	H. sapiens	1907	H. sapiens	EDN2	endothelin 2	GO:0003058 hormonal regulation of the force of heart contraction;GO:0014826 vein smooth muscle contraction;GO:0003099 positive regulation of the force of heart contraction by chemical signal			Cytosol(Approved)		(M8)PID ENDOTHELIN PATHWAY; (M145)PID P53 DOWNSTREAM PATHWAY	(M5956)HALLMARK KRAS SIGNALING DN; (M5891)HALLMARK HYPOXIA	0	0	0	0	0	1	0	0	0	0	0	0	1	0	0	0	0	0	0	1	1
56944	OLFML3	0	1	56944	Gene_ID	H. sapiens	56944	H. sapiens	OLFML3	olfactomedin like 3	GO:0007275 multicellular organism development;GO:0048856 anatomical structure development;GO:0032502 developmental process			Vesicles(Supported)			(M5906)HALLMARK ESTROGEN RESPONSE EARLY	0	0	0	0	0	0	0	0	0	0	0	0	0	0	0	0	0	0	0	0	1
10403	NDC80	1	0	10403	Gene_ID	H. sapiens	10403	H. sapiens	NDC80	NDC80 kinetochore complex component	GO:0090267 positive regulation of mitotic cell cycle spindle assembly checkpoint;GO:0090266 regulation of mitotic cell cycle spindle assembly checkpoint;GO:1903504 regulation of mitotic spindle checkpoint			Nucleoplasm(Supported)Centrosome(Approved)		(M14)PID AURORA B PATHWAY; (M129)PID PLK1 PATHWAY	(M5893)HALLMARK MITOTIC SPINDLE; (M5901)HALLMARK G2M CHECKPOINT	1	1	1	0	0	0	1	1	1	0	1	0	0	1	1	0	0	0	0	0	1
1719	DHFR	1	0	1719	Gene_ID	H. sapiens	1719	H. sapiens	DHFR	dihydrofolate reductase	GO:2000121 regulation of removal of superoxide radicals;GO:0006729 tetrahydrobiopterin biosynthetic process;GO:0046452 dihydrofolate metabolic process		Enzymes/ENZYME proteins/Oxidoreductases	Mitochondria(Supported)	NADH (Nadph binding);Pyrimethamine (Nadph binding);Trimethoprim (Nadph binding);Methotrexate (Nadph binding);Pemetrexed (Nadph binding);Gentamicin (Nadph binding);Proguanil (Nadph binding);Trimetrexate (Nadph binding);2,4-Diamino-5-Methyl-6-[(3,4,5-Trimethoxy-N-Methylanilino)Methyl]Pyrido[2,3-D]Pyrimidine (Nadph binding);2,4-Diamino-6-[N-(2',5'-Dimethoxybenzyl)-N-Methylamino]Quinazoline (Nadph bi…	(M40)PID E2F PATHWAY	(M5924)HALLMARK MTORC1 SIGNALING	1	0	1	1	0	0	0	0	0	0	0	0	0	0	0	0	0	0	0	1	1
100302274	MIR1178	1	0	100302274	Gene_ID	H. sapiens	100302274	H. sapiens	MIR1178	microRNA 1178								0	0	0	0	0	0	0	0	0	0	0	0	0	0	0	0	0	0	0	0	1
5738	PTGFRN	1	0	5738	Gene_ID	H. sapiens	5738	H. sapiens	PTGFRN	prostaglandin F2 receptor inhibitor	GO:0014905 myoblast fusion involved in skeletal muscle regeneration;GO:0014908 myotube differentiation involved in skeletal muscle regeneration;GO:0007520 myoblast fusion		CD markers					0	0	0	0	0	0	0	0	0	0	0	0	0	0	0	0	0	0	0	0	1
1953	MEGF6	1	0	1953	Gene_ID	H. sapiens	1953	H. sapiens	MEGF6	multiple EGF like domains 6	GO:0008150 biological_process			Cytokinetic bridge;Microtubules(Approved)		(M5883)NABA SECRETED FACTORS; (M5885)NABA MATRISOME ASSOCIATED; (M5889)NABA MATRISOME		0	0	0	0	0	0	0	0	0	0	0	0	0	0	0	0	0	0	0	0	1
8318	CDC45	0	1	8318	Gene_ID	H. sapiens	8318	H. sapiens	CDC45	cell division cycle 45	GO:1902977 mitotic DNA replication preinitiation complex assembly;GO:0031938 regulation of chromatin silencing at telomere;GO:0071163 DNA replication preinitiation complex assembly			Cytosol;Nucleoplasm(Supported)Centrosome(Approved)			(M5901)HALLMARK G2M CHECKPOINT; (M5926)HALLMARK MYC TARGETS V1	1	0	1	1	1	0	0	1	0	0	1	0	0	1	0	0	0	0	0	0	1
51768	TM7SF3	0	1	51768	Gene_ID	H. sapiens	51768	H. sapiens	TM7SF3	transmembrane 7 superfamily member 3	GO:0032024 positive regulation of insulin secretion;GO:0090277 positive regulation of peptide hormone secretion;GO:0050796 regulation of insulin secretion			Cytosol;Nucleus(Supported)			(M5939)HALLMARK P53 PATHWAY	0	0	0	0	0	0	0	0	0	0	0	0	0	0	0	0	0	0	0	0	1
10951	CBX1	0	1	10951	Gene_ID	H. sapiens	10951	H. sapiens	CBX1	chromobox 1	GO:0045892 negative regulation of transcription, DNA-templated;GO:1903507 negative regulation of nucleic acid-templated transcription;GO:1902679 negative regulation of RNA biosynthetic process			Nuclear bodies;Nucleus(Supported)			(M5901)HALLMARK G2M CHECKPOINT	0	0	0	0	0	0	0	0	0	0	0	0	0	0	0	0	0	0	0	0	1
5891	MOK	0	1	5891	Gene_ID	H. sapiens	5891	H. sapiens	MOK	MOK protein kinase	GO:0051726 regulation of cell cycle;GO:0006468 protein phosphorylation;GO:0016310 phosphorylation	CMGC Ser/Thr protein kinase family	Enzymes/{ENZYME proteins/Transferases,Kinases/CMGC Ser/Thr protein kinases}	Endoplasmic reticulum(Supported)				0	0	0	0	0	0	0	0	0	0	0	0	0	0	0	0	0	0	0	0	1
8520	HAT1	0	1	8520	Gene_ID	H. sapiens	8520	H. sapiens	HAT1	histone acetyltransferase 1	GO:0006335 DNA replication-dependent nucleosome assembly;GO:0006348 chromatin silencing at telomere;GO:0006336 DNA replication-independent nucleosome assembly		Enzymes/ENZYME proteins/Transferases	Nucleoplasm(Enhanced)				0	0	0	0	1	0	0	0	0	0	0	0	0	1	0	0	0	0	0	0	1
10060	ABCC9	0	1	10060	Gene_ID	H. sapiens	10060	H. sapiens	ABCC9	ATP binding cassette subfamily C member 9	GO:1903779 regulation of cardiac conduction;GO:1990573 potassium ion import across plasma membrane;GO:0010107 potassium ion import		Transporters/Primary Active Transporters	Cytosol;Nucleoplasm(Approved)	Adenosine triphosphate (Transporter activity);Glyburide (Transporter activity)			0	0	0	0	0	0	0	0	0	0	0	0	0	0	0	0	0	0	0	0	1
57523	NYNRIN	1	0	57523	Gene_ID	H. sapiens	57523	H. sapiens	NYNRIN	NYN domain and retroviral integrase containing	GO:0015074 DNA integration;GO:0006259 DNA metabolic process;GO:0090304 nucleic acid metabolic process			Golgi apparatus;Nucleoplasm;Vesicles(Approved)				0	0	0	0	0	0	0	0	0	0	0	0	0	0	0	0	0	0	0	0	1
200150	PLD5	0	1	200150	Gene_ID	H. sapiens	200150	H. sapiens	PLD5	phospholipase D family member 5				Cytosol;Mitochondria;Vesicles(Approved)				0	0	0	0	0	0	0	0	0	0	0	0	0	0	0	0	0	0	0	0	1
11319	ECD	0	1	11319	Gene_ID	H. sapiens	11319	H. sapiens	ECD	ecdysoneless cell cycle regulator	GO:2000045 regulation of G1/S transition of mitotic cell cycle;GO:1902806 regulation of cell cycle G1/S phase transition;GO:0000082 G1/S transition of mitotic cell cycle			Cytosol;Nucleoplasm(Supported)			(M5937)HALLMARK GLYCOLYSIS	0	0	1	0	0	0	0	0	0	0	0	0	0	0	0	0	0	0	0	0	1
55198	APPL2	0	1	55198	Gene_ID	H. sapiens	55198	H. sapiens	APPL2	adaptor protein, phosphotyrosine interacting with PH domain and leucine zipper 2	GO:1905451 positive regulation of Fc-gamma receptor signaling pathway involved in phagocytosis;GO:1905303 positive regulation of macropinocytosis;GO:1905449 regulation of Fc-gamma receptor signaling pathway involved in phagocytosis							0	0	1	0	0	0	0	0	0	0	0	0	1	0	0	0	0	0	0	0	1
9209	LRRFIP2	0	1	9209	Gene_ID	H. sapiens	9209	H. sapiens	LRRFIP2	LRR binding FLII interacting protein 2	GO:0016055 Wnt signaling pathway;GO:0198738 cell-cell signaling by wnt;GO:1905114 cell surface receptor signaling pathway involved in cell-cell signaling		Transcription factors/Yet undefined DNA-binding domains	Actin filaments;Plasma membrane(Approved)				0	0	0	0	0	0	0	0	0	0	0	0	0	0	0	0	0	0	0	0	1
23336	SYNM	1	0	23336	Gene_ID	H. sapiens	23336	H. sapiens	SYNM	synemin	GO:0031443 fast-twitch skeletal muscle fiber contraction;GO:0014721 twitch skeletal muscle contraction;GO:0003010 voluntary skeletal muscle contraction							0	0	0	0	0	0	0	0	0	0	0	0	0	0	0	0	0	0	0	0	1
51303	FKBP11	1	0	51303	Gene_ID	H. sapiens	51303	H. sapiens	FKBP11	FKBP prolyl isomerase 11	GO:0000413 protein peptidyl-prolyl isomerization;GO:0018208 peptidyl-proline modification;GO:0018193 peptidyl-amino acid modification		Enzymes/ENZYME proteins/Isomerase	Centrosome(Approved)				0	0	0	0	0	0	0	0	0	0	0	0	0	0	0	0	0	0	0	0	1
116372	LYPD1	1	0	116372	Gene_ID	H. sapiens	116372	H. sapiens	LYPD1	LY6/PLAUR domain containing 1	GO:1903077 negative regulation of protein localization to plasma membrane;GO:0095500 acetylcholine receptor signaling pathway;GO:1904376 negative regulation of protein localization to cell periphery							0	0	0	0	0	0	0	0	0	0	0	0	0	0	0	0	0	0	0	0	1
92737	DNER	0	1	92737	Gene_ID	H. sapiens	92737	H. sapiens	DNER	delta/notch like EGF repeat containing	GO:0048741 skeletal muscle fiber development;GO:0014904 myotube cell development;GO:0007220 Notch receptor processing					(M17)PID NOTCH PATHWAY		0	0	0	0	0	0	0	0	0	0	0	0	0	0	0	0	0	0	0	0	1
50862	RNF141	0	1	50862	Gene_ID	H. sapiens	50862	H. sapiens	RNF141	ring finger protein 141	GO:0051865 protein autoubiquitination;GO:0016567 protein ubiquitination;GO:0032446 protein modification by small protein conjugation			Microtubules;Nucleoplasm(Approved)				0	0	0	0	0	0	0	0	0	0	0	0	0	0	0	0	0	0	0	0	1
5054	SERPINE1	0	1	5054	Gene_ID	H. sapiens	5054	H. sapiens	SERPINE1	serpin family E member 1	GO:0061044 negative regulation of vascular wound healing;GO:0035491 positive regulation of leukotriene production involved in inflammatory response;GO:1901331 positive regulation of odontoblast differentiation			Cytosol(Approved)	Alteplase (Serine-type endopeptidase inhibitor activity);Urokinase (Serine-type endopeptidase inhibitor activity);Reteplase (Serine-type endopeptidase inhibitor activity);Anistreplase (Serine-type endopeptidase inhibitor activity);Tenecteplase (Serine-type endopeptidase inhibitor activity);Drotrecogin alfa (Serine-type endopeptidase inhibitor activity);Troglitazone (Serine-type endopeptidase inhi…	(M44)PID HIF2PATHWAY; (M174)PID UPA UPAR PATHWAY; (M255)PID HIF1 TFPATHWAY	(M5896)HALLMARK TGF BETA SIGNALING; (M5946)HALLMARK COAGULATION; (M5942)HALLMARK UV RESPONSE DN	0	0	0	0	0	0	0	0	0	0	0	0	1	0	0	0	0	1	1	1	1
80307	FER1L4	1	0	80307	Gene_ID	H. sapiens	80307	H. sapiens	FER1L4	fer-1 like family member 4 (pseudogene)	GO:0007009 plasma membrane organization;GO:0010256 endomembrane system organization;GO:0061024 membrane organization							0	0	0	0	0	0	0	0	0	0	0	0	0	0	0	0	0	0	0	0	1
7913	DEK	0	1	7913	Gene_ID	H. sapiens	7913	H. sapiens	DEK	DEK proto-oncogene	GO:2001032 regulation of double-strand break repair via nonhomologous end joining;GO:2000779 regulation of double-strand break repair;GO:0019079 viral genome replication			Nucleus(Enhanced)			(M5925)HALLMARK E2F TARGETS; (M5926)HALLMARK MYC TARGETS V1	0	0	0	0	1	0	0	0	0	1	0	0	0	0	0	0	0	0	0	0	1
58493	INIP	0	1	58493	Gene_ID	H. sapiens	58493	H. sapiens	INIP	INTS3 and NABP interacting protein	GO:0010212 response to ionizing radiation;GO:0006281 DNA repair;GO:0009314 response to radiation			Nucleoplasm(Supported)				0	0	0	0	1	0	0	0	0	0	0	0	0	0	0	0	0	0	0	0	1
26509	MYOF	0	1	26509	Gene_ID	H. sapiens	26509	H. sapiens	MYOF	myoferlin	GO:0033292 T-tubule organization;GO:0001778 plasma membrane repair;GO:0006071 glycerol metabolic process			Plasma membrane;Vesicles(Supported)		(M237)PID VEGFR1 2 PATHWAY	(M5906)HALLMARK ESTROGEN RESPONSE EARLY; (M5907)HALLMARK ESTROGEN RESPONSE LATE	0	0	0	0	0	0	0	0	0	0	0	0	0	0	0	0	0	0	0	0	1
26271	FBXO5	0	1	26271	Gene_ID	H. sapiens	26271	H. sapiens	FBXO5	F-box protein 5	GO:0007057 spindle assembly involved in female meiosis I;GO:0032876 negative regulation of DNA endoreduplication;GO:1905322 positive regulation of mesenchymal stem cell migration			Nucleoplasm(Supported)		(M129)PID PLK1 PATHWAY	(M5893)HALLMARK MITOTIC SPINDLE; (M5901)HALLMARK G2M CHECKPOINT	1	1	1	1	0	1	1	1	0	1	1	1	1	0	1	1	0	0	0	0	1
57462	KIAA1161	0	1	57462	Gene_ID	H. sapiens	57462	H. sapiens	MYORG	myogenesis regulating glycosidase (putative)	GO:0043568 positive regulation of insulin-like growth factor receptor signaling pathway;GO:0048741 skeletal muscle fiber development;GO:0043567 regulation of insulin-like growth factor receptor signaling pathway			Mitochondria(Approved)				0	0	0	0	0	0	0	0	0	0	0	0	0	0	0	0	0	0	0	0	1
57505	AARS2	1	0	57505	Gene_ID	H. sapiens	57505	H. sapiens	AARS2	alanyl-tRNA synthetase 2, mitochondrial	GO:0070143 mitochondrial alanyl-tRNA aminoacylation;GO:0006419 alanyl-tRNA aminoacylation;GO:0070127 tRNA aminoacylation for mitochondrial protein translation		Enzymes/ENZYME proteins/Ligase	Mitochondria(Enhanced)	L-Alanine (Trna binding)			0	0	0	0	0	0	0	0	0	0	0	0	0	0	0	0	0	0	0	0	1
8394	PIP5K1A	0	1	8394	Gene_ID	H. sapiens	8394	H. sapiens	PIP5K1A	phosphatidylinositol-4-phosphate 5-kinase type 1 alpha	GO:0048041 focal adhesion assembly;GO:0046854 phosphatidylinositol phosphorylation;GO:0010761 fibroblast migration		Enzymes/ENZYME proteins/Transferases	Cytosol;Nucleoplasm;Plasma membrane(Supported)		(M120)PID ARF6 DOWNSTREAM PATHWAY; (M243)PID ARF 3PATHWAY; (M184)PID ECADHERIN KERATINOCYTE PATHWAY		0	0	0	0	0	1	0	0	0	0	0	0	1	0	0	0	0	0	0	1	1
64750	SMURF2	0	1	64750	Gene_ID	H. sapiens	64750	H. sapiens	SMURF2	SMAD specific E3 ubiquitin protein ligase 2	GO:1901165 positive regulation of trophoblast cell migration;GO:0030579 ubiquitin-dependent SMAD protein catabolic process;GO:1901163 regulation of trophoblast cell migration		Enzymes/ENZYME proteins/Transferases	Nuclear speckles(Supported)		(M181)PID BMP PATHWAY; (M286)PID TGFBR PATHWAY	(M5896)HALLMARK TGF BETA SIGNALING	0	0	0	0	0	0	0	0	0	0	0	0	1	0	0	0	0	0	0	0	1
27258	LSM3	0	1	27258	Gene_ID	H. sapiens	27258	H. sapiens	LSM3	LSM3 homolog, U6 small nuclear RNA and mRNA degradation associated	GO:0043928 exonucleolytic nuclear-transcribed mRNA catabolic process involved in deadenylation-dependent decay;GO:0000291 nuclear-transcribed mRNA catabolic process, exonucleolytic;GO:0000288 nuclear-transcribed mRNA catabolic process, deadenylation-dependent decay			Nucleoli;Nucleus(Approved)				0	0	0	0	0	0	0	0	0	0	0	0	0	0	0	0	0	0	0	0	1
51196	PLCE1	0	1	51196	Gene_ID	H. sapiens	51196	H. sapiens	PLCE1	phospholipase C epsilon 1	GO:0051209 release of sequestered calcium ion into cytosol;GO:0006651 diacylglycerol biosynthetic process;GO:0097553 calcium ion transmembrane import into cytosol		Enzymes/ENZYME proteins/Hydrolases;RAS pathway related proteins	Cytosol(Supported)		(M269)PID RAS PATHWAY		0	0	0	0	0	0	0	0	0	0	0	0	0	0	0	0	0	0	0	0	1
55740	ENAH	0	1	55740	Gene_ID	H. sapiens	55740	H. sapiens	ENAH	ENAH actin regulator	GO:0070358 actin polymerization-dependent cell motility;GO:0007411 axon guidance;GO:0097485 neuron projection guidance			Cytosol;Focal adhesion sites;Plasma membrane(Enhanced)		(M156)PID ECADHERIN NASCENT AJ PATHWAY; (M232)PID ECADHERIN STABILIZATION PATHWAY; (M81)PID CDC42 PATHWAY		0	0	0	0	0	1	0	0	0	0	0	0	0	0	0	0	0	0	0	1	1
9414	TJP2	0	1	9414	Gene_ID	H. sapiens	9414	H. sapiens	TJP2	tight junction protein 2	GO:0046710 GDP metabolic process;GO:0090557 establishment of endothelial intestinal barrier;GO:1905605 positive regulation of maintenance of permeability of blood-brain barrier			Cell Junctions;Cytosol;Plasma membrane(Enhanced)Nucleoplasm(Supported)		(M254)PID MYC REPRESS PATHWAY		0	0	0	0	0	0	0	0	0	0	0	0	0	0	0	0	0	0	0	0	1
9184	BUB3	0	1	9184	Gene_ID	H. sapiens	9184	H. sapiens	BUB3	BUB3 mitotic checkpoint protein	GO:0007094 mitotic spindle assembly checkpoint;GO:0071174 mitotic spindle checkpoint;GO:0045841 negative regulation of mitotic metaphase/anaphase transition			Nucleoplasm(Enhanced)		(M19)PID P73PATHWAY	(M5901)HALLMARK G2M CHECKPOINT; (M5926)HALLMARK MYC TARGETS V1	1	1	1	0	0	0	0	1	0	0	0	0	0	0	1	1	0	0	0	0	1
10272	FSTL3	0	1	10272	Gene_ID	H. sapiens	10272	H. sapiens	FSTL3	follistatin like 3	GO:0045671 negative regulation of osteoclast differentiation;GO:0032926 negative regulation of activin receptor signaling pathway;GO:0002762 negative regulation of myeloid leukocyte differentiation			Nucleoplasm(Approved)		(M5883)NABA SECRETED FACTORS; (M5885)NABA MATRISOME ASSOCIATED; (M5889)NABA MATRISOME	(M5930)HALLMARK EPITHELIAL MESENCHYMAL TRANSITION	0	0	0	0	0	0	0	0	0	0	0	0	0	0	0	0	0	0	1	0	1
7319	UBE2A	0	1	7319	Gene_ID	H. sapiens	7319	H. sapiens	UBE2A	ubiquitin conjugating enzyme E2 A	GO:0033522 histone H2A ubiquitination;GO:0001835 blastocyst hatching;GO:0070979 protein K11-linked ubiquitination		Enzymes/ENZYME proteins/Transferases	Cytosol;Nucleoplasm;Plasma membrane;Vesicles(Supported)				0	0	0	0	1	0	0	0	0	0	0	0	0	0	0	0	0	0	0	0	1
54206	ERRFI1	0	1	54206	Gene_ID	H. sapiens	54206	H. sapiens	ERRFI1	ERBB receptor feedback inhibitor 1	GO:1903243 negative regulation of cardiac muscle hypertrophy in response to stress;GO:0010616 negative regulation of cardiac muscle adaptation;GO:1903242 regulation of cardiac muscle hypertrophy in response to stress			Cytosol(Supported)			(M5892)HALLMARK CHOLESTEROL HOMEOSTASIS; (M5891)HALLMARK HYPOXIA	0	0	0	0	0	0	0	0	0	0	0	0	1	0	0	0	0	0	0	0	1
81610	FAM83D	1	0	81610	Gene_ID	H. sapiens	81610	H. sapiens	FAM83D	family with sequence similarity 83 member D	GO:1902480 protein localization to mitotic spindle;GO:1902808 positive regulation of cell cycle G1/S phase transition;GO:0072698 protein localization to microtubule cytoskeleton							0	1	1	0	0	0	0	0	0	0	1	0	0	0	0	0	0	0	0	0	1
55771	PRR11	1	0	55771	Gene_ID	H. sapiens	55771	H. sapiens	PRR11	proline rich 11	GO:0007050 cell cycle arrest;GO:0045786 negative regulation of cell cycle;GO:0051726 regulation of cell cycle			Endoplasmic reticulum(Approved)				0	0	1	0	0	0	0	0	0	0	0	0	0	0	0	0	0	0	0	0	1
595	CCND1	0	1	595	Gene_ID	H. sapiens	595	H. sapiens	CCND1	cyclin D1	GO:0033601 positive regulation of mammary gland epithelial cell proliferation;GO:0031571 mitotic G1 DNA damage checkpoint;GO:0033327 Leydig cell differentiation			Nucleoplasm(Supported)	Arsenic trioxide (Transcription factor binding)	(M209)PID P38 GAMMA DELTA PATHWAY; (M3686)SA REG CASCADE OF CYCLIN EXPR; (M1529)SA G1 AND S PHASES	(M5903)HALLMARK NOTCH SIGNALING; (M5908)HALLMARK ANDROGEN RESPONSE; (M5902)HALLMARK APOPTOSIS	1	1	1	1	0	0	0	0	0	0	1	1	1	0	0	0	0	0	0	0	1
55313	CPPED1	0	1	55313	Gene_ID	H. sapiens	55313	H. sapiens	CPPED1	calcineurin like phosphoesterase domain containing 1	GO:0043312 neutrophil degranulation;GO:0002283 neutrophil activation involved in immune response;GO:0042119 neutrophil activation		Enzymes/ENZYME proteins/Hydrolases	Cytosol;Plasma membrane(Supported)				0	0	0	0	0	0	0	0	0	0	0	0	0	0	0	0	0	0	0	0	1
284119	PTRF	0	1	284119	Gene_ID	H. sapiens	284119	H. sapiens	CAVIN1	caveolae associated protein 1	GO:0006363 termination of RNA polymerase I transcription;GO:0006361 transcription initiation from RNA polymerase I promoter;GO:0009303 rRNA transcription			Plasma membrane(Supported)Vesicles(Approved)			(M5905)HALLMARK ADIPOGENESIS; (M5891)HALLMARK HYPOXIA	0	0	0	0	0	0	0	0	0	0	0	0	1	0	0	0	0	0	0	0	1
8506	CNTNAP1	1	0	8506	Gene_ID	H. sapiens	8506	H. sapiens	CNTNAP1	contactin associated protein 1	GO:0030913 paranodal junction assembly;GO:0022010 central nervous system myelination;GO:0022011 myelination in peripheral nervous system			Nucleoplasm(Approved)				0	0	0	0	0	0	0	0	0	0	0	0	0	0	0	0	0	0	0	1	1
1107	CHD3	1	0	1107	Gene_ID	H. sapiens	1107	H. sapiens	CHD3	chromodomain helicase DNA binding protein 3	GO:0032508 DNA duplex unwinding;GO:0043044 ATP-dependent chromatin remodeling;GO:0007098 centrosome cycle		Enzymes/ENZYME proteins/Hydrolases	Microtubule organizing center;Nucleoli;Nucleus(Approved)		(M101)PID HDAC CLASSI PATHWAY		0	1	0	0	1	0	0	0	0	0	0	0	0	1	0	0	0	0	0	0	1
60	ACTB	0	1	60	Gene_ID	H. sapiens	60	H. sapiens	ACTB	actin beta	GO:0051623 positive regulation of norepinephrine uptake;GO:0051621 regulation of norepinephrine uptake;GO:0072749 cellular response to cytochalasin B					(M5493)WNT SIGNALING	(M5915)HALLMARK APICAL JUNCTION	1	0	0	0	1	1	0	0	0	0	0	0	0	1	0	0	0	1	0	1	1
6372	CXCL6	0	1	6372	Gene_ID	H. sapiens	6372	H. sapiens	CXCL6	C-X-C motif chemokine ligand 6	GO:0070951 regulation of neutrophil mediated killing of gram-negative bacterium;GO:0070950 regulation of neutrophil mediated killing of bacterium;GO:0070945 neutrophil mediated killing of gram-negative bacterium					(M5883)NABA SECRETED FACTORS; (M5885)NABA MATRISOME ASSOCIATED; (M5889)NABA MATRISOME	(M5944)HALLMARK ANGIOGENESIS; (M5932)HALLMARK INFLAMMATORY RESPONSE; (M5930)HALLMARK EPITHELIAL MESENCHYMAL TRANSITION	0	0	0	0	0	0	0	0	0	0	0	0	0	0	0	0	0	0	0	1	1
93663	ARHGAP18	0	1	93663	Gene_ID	H. sapiens	93663	H. sapiens	ARHGAP18	Rho GTPase activating protein 18	GO:0030833 regulation of actin filament polymerization;GO:0008064 regulation of actin polymerization or depolymerization;GO:0030041 actin filament polymerization			Cytosol;Nuclear speckles;Plasma membrane(Approved)				1	0	0	0	0	1	0	0	0	0	0	0	0	0	0	0	0	0	0	1	1
79968	WDR76	0	1	79968	Gene_ID	H. sapiens	79968	H. sapiens	WDR76	WD repeat domain 76	GO:2000001 regulation of DNA damage checkpoint;GO:1901976 regulation of cell cycle checkpoint;GO:0000077 DNA damage checkpoint			Nuclear bodies;Nucleoli fibrillar center(Approved)				0	0	1	0	0	0	0	0	0	1	0	0	0	0	0	0	0	0	0	0	1
10395	DLC1	0	1	10395	Gene_ID	H. sapiens	10395	H. sapiens	DLC1	DLC1 Rho GTPase activating protein	GO:0051497 negative regulation of stress fiber assembly;GO:0051895 negative regulation of focal adhesion assembly;GO:0001843 neural tube closure			Golgi apparatus;Nucleoplasm;Vesicles(Approved)		(M68)PID RHOA REG PATHWAY	(M5942)HALLMARK UV RESPONSE DN; (M5906)HALLMARK ESTROGEN RESPONSE EARLY	1	0	0	0	0	1	0	0	0	0	0	0	0	0	1	0	0	0	1	1	1
253714	MMS22L	0	1	253714	Gene_ID	H. sapiens	253714	H. sapiens	MMS22L	MMS22 like, DNA repair protein	GO:0031297 replication fork processing;GO:0045005 DNA-dependent DNA replication maintenance of fidelity;GO:0000724 double-strand break repair via homologous recombination			Nucleoplasm(Supported)			(M5925)HALLMARK E2F TARGETS	0	0	0	1	1	0	0	0	0	0	0	0	0	0	0	0	0	0	0	0	1
6224	RPS20	0	1	6224	Gene_ID	H. sapiens	6224	H. sapiens	RPS20	ribosomal protein S20	GO:0006614 SRP-dependent cotranslational protein targeting to membrane;GO:0006613 cotranslational protein targeting to membrane;GO:0000184 nuclear-transcribed mRNA catabolic process, nonsense-mediated decay		Ribosomal proteins	Cytosol;Endoplasmic reticulum(Supported)				0	0	0	0	0	0	0	0	0	0	0	0	0	0	0	0	0	0	0	0	1
5101	PCDH9	0	1	5101	Gene_ID	H. sapiens	5101	H. sapiens	PCDH9	protocadherin 9	GO:0007156 homophilic cell adhesion via plasma membrane adhesion molecules;GO:0098742 cell-cell adhesion via plasma-membrane adhesion molecules;GO:0098609 cell-cell adhesion			Centrosome;Nucleoplasm(Approved)				0	0	0	0	0	0	0	0	0	0	0	0	0	0	0	0	0	0	0	0	1
23122	CLASP2	0	1	23122	Gene_ID	H. sapiens	23122	H. sapiens	CLASP2	cytoplasmic linker associated protein 2	GO:1903690 negative regulation of wound healing, spreading of epidermal cells;GO:1903689 regulation of wound healing, spreading of epidermal cells;GO:1904261 positive regulation of basement membrane assembly involved in embryonic body morphogenesis			Golgi apparatus(Supported)Cytosol(Approved)				1	1	1	0	0	1	0	0	0	0	0	0	1	0	1	0	0	0	1	0	1
7791	ZYX	0	1	7791	Gene_ID	H. sapiens	7791	H. sapiens	ZYX	zyxin	GO:0043149 stress fiber assembly;GO:0030038 contractile actin filament bundle assembly;GO:0071346 cellular response to interferon-gamma			Focal adhesion sites(Supported)		(M184)PID ECADHERIN KERATINOCYTE PATHWAY; (M232)PID ECADHERIN STABILIZATION PATHWAY; (M238)PID THROMBIN PAR1 PATHWAY	(M5915)HALLMARK APICAL JUNCTION	0	0	0	0	0	1	0	0	0	0	0	0	0	0	0	0	0	0	0	0	1
9249	DHRS3	1	0	9249	Gene_ID	H. sapiens	9249	H. sapiens	DHRS3	dehydrogenase/reductase 3	GO:0048387 negative regulation of retinoic acid receptor signaling pathway;GO:0042572 retinol metabolic process;GO:0048385 regulation of retinoic acid receptor signaling pathway		Enzymes/ENZYME proteins/Oxidoreductases	Mitochondria;Nucleoli(Approved)	Vitamin A (Retinol dehydrogenase activity)	(M256)PID TAP63 PATHWAY	(M5949)HALLMARK PEROXISOME; (M5947)HALLMARK IL2 STAT5 SIGNALING; (M5906)HALLMARK ESTROGEN RESPONSE EARLY	0	0	0	0	0	0	0	0	0	0	0	0	0	0	0	0	0	0	0	0	1
7464	CORO2A	0	1	7464	Gene_ID	H. sapiens	7464	H. sapiens	CORO2A	coronin 2A	GO:0035556 intracellular signal transduction;GO:0007165 signal transduction;GO:0023052 signaling			Cytosol;Plasma membrane(Approved)				0	0	0	0	0	0	0	0	0	0	0	0	0	0	0	0	0	0	0	0	1
83990	BRIP1	1	0	83990	Gene_ID	H. sapiens	83990	H. sapiens	BRIP1	BRCA1 interacting protein C-terminal helicase 1	GO:0010705 meiotic DNA double-strand break processing involved in reciprocal meiotic recombination;GO:0051026 chiasma assembly;GO:0007284 spermatogonial cell division		Enzymes/ENZYME proteins/Hydrolases	Nuclear membrane;Nucleus(Supported)		(M1)PID FANCONI PATHWAY		1	1	1	1	1	0	0	0	0	0	0	0	0	0	0	1	0	0	0	0	1
51377	UCHL5	0	1	51377	Gene_ID	H. sapiens	51377	H. sapiens	UCHL5	ubiquitin C-terminal hydrolase L5	GO:0032435 negative regulation of proteasomal ubiquitin-dependent protein catabolic process;GO:2000059 negative regulation of ubiquitin-dependent protein catabolic process;GO:1901799 negative regulation of proteasomal protein catabolic process		Enzymes/{ENZYME proteins/Hydrolases,Peptidases/Cysteine-type peptidases}	Mitochondria;Nucleoplasm(Approved)			(M5924)HALLMARK MTORC1 SIGNALING	0	0	0	0	1	0	0	0	0	0	0	0	0	0	0	0	0	0	0	0	1
9786	KIAA0586	0	1	9786	Gene_ID	H. sapiens	9786	H. sapiens	KIAA0586	KIAA0586	GO:0007224 smoothened signaling pathway;GO:0060271 cilium assembly;GO:0044782 cilium organization			Cytosol;Nucleoplasm(Approved)				0	0	0	0	0	0	0	0	0	0	0	0	0	0	0	0	0	0	0	0	1
6404	SELPLG	1	0	6404	Gene_ID	H. sapiens	6404	H. sapiens	SELPLG	selectin P ligand	GO:0050902 leukocyte adhesive activation;GO:0046718 viral entry into host cell;GO:0050901 leukocyte tethering or rolling		CD markers			(M159)PID AMB2 NEUTROPHILS PATHWAY		0	0	0	0	0	0	0	0	0	0	0	0	0	0	0	0	0	1	0	0	1
5962	RDX	0	1	5962	Gene_ID	H. sapiens	5962	H. sapiens	RDX	radixin	GO:0051016 barbed-end actin filament capping;GO:1902966 positive regulation of protein localization to early endosome;GO:0032487 regulation of Rap protein signal transduction			Plasma membrane(Enhanced)	D-Myo-Inositol-1,4,5-Triphosphate (Protein kinase a binding)	(M12645)ST GA13 PATHWAY; (M12)PID RHOA PATHWAY		0	0	1	0	0	1	0	0	0	0	1	0	1	0	1	0	0	0	1	1	1
9037	SEMA5A	1	0	9037	Gene_ID	H. sapiens	9037	H. sapiens	SEMA5A	semaphorin 5A	GO:0048842 positive regulation of axon extension involved in axon guidance;GO:0048843 negative regulation of axon extension involved in axon guidance;GO:1902669 positive regulation of axon guidance					(M5880)NABA ECM AFFILIATED; (M5885)NABA MATRISOME ASSOCIATED; (M5889)NABA MATRISOME		0	0	0	0	0	1	0	0	0	0	0	0	1	0	0	0	0	0	1	1	1
80114	BICC1	0	1	80114	Gene_ID	H. sapiens	80114	H. sapiens	BICC1	BicC family RNA binding protein 1	GO:0090090 negative regulation of canonical Wnt signaling pathway;GO:0030178 negative regulation of Wnt signaling pathway;GO:0007368 determination of left/right symmetry			Nucleoplasm(Approved)				0	0	0	0	0	0	0	0	0	0	0	0	0	0	0	0	0	0	0	0	1
9077	DIRAS3	1	0	9077	Gene_ID	H. sapiens	9077	H. sapiens	DIRAS3	DIRAS family GTPase 3	GO:0006349 regulation of gene expression by genetic imprinting;GO:0000079 regulation of cyclin-dependent protein serine/threonine kinase activity;GO:1904029 regulation of cyclin-dependent protein kinase activity			Cytosol;Nuclear membrane(Approved)				0	0	0	0	0	0	0	0	0	0	0	0	0	0	0	0	0	0	0	0	1
102465841	MIR7855	0	1	102465841	Gene_ID	H. sapiens	102465841	H. sapiens	MIR7855	microRNA 7855								0	0	0	0	0	0	0	0	0	0	0	0	0	0	0	0	0	0	0	0	1
5931	RBBP7	0	1	5931	Gene_ID	H. sapiens	5931	H. sapiens	RBBP7	RB binding protein 7, chromatin remodeling factor	GO:0034080 CENP-A containing nucleosome assembly;GO:0070370 cellular heat acclimation;GO:0070317 negative regulation of G0 to G1 transition					(M219)PID HEDGEHOG GLI PATHWAY; (M101)PID HDAC CLASSI PATHWAY; (M105)PID TELOMERASE PATHWAY	(M5925)HALLMARK E2F TARGETS	1	0	1	1	1	0	0	0	0	0	0	0	0	1	0	0	0	0	0	0	1
133	ADM	0	1	133	Gene_ID	H. sapiens	133	H. sapiens	ADM	adrenomedullin	GO:2000184 positive regulation of progesterone biosynthetic process;GO:2000182 regulation of progesterone biosynthetic process;GO:0045906 negative regulation of vasoconstriction					(M255)PID HIF1 TFPATHWAY	(M5932)HALLMARK INFLAMMATORY RESPONSE; (M5891)HALLMARK HYPOXIA	0	0	0	0	0	1	0	0	0	0	0	0	1	0	0	0	0	0	0	0	1
693221	MIR636	0	1	693221	Gene_ID	H. sapiens	693221	H. sapiens	MIR636	microRNA 636								0	0	0	0	0	0	0	0	0	0	0	0	0	0	0	0	0	0	0	0	1
100507632	LINC00968	0	1	100507632	Gene_ID	H. sapiens	100507632	H. sapiens	LINC00968	long intergenic non-protein coding RNA 968								0	0	0	0	0	0	0	0	0	0	0	0	0	0	0	0	0	0	0	0	1
9637	FEZ2	0	1	9637	Gene_ID	H. sapiens	9637	H. sapiens	FEZ2	fasciculation and elongation protein zeta 2	GO:1902902 negative regulation of autophagosome assembly;GO:2000785 regulation of autophagosome assembly;GO:0016242 negative regulation of macroautophagy			Cytosol;Golgi apparatus;Nucleoli(Approved)				0	0	0	0	0	0	0	0	0	0	0	0	0	0	1	0	0	0	0	1	1
29980	DONSON	0	1	29980	Gene_ID	H. sapiens	29980	H. sapiens	DONSON	DNA replication fork stabilization factor DONSON	GO:0007095 mitotic G2 DNA damage checkpoint;GO:0048478 replication fork protection;GO:0044818 mitotic G2/M transition checkpoint			Cell Junctions;Cytosol;Nucleoplasm(Approved)			(M5925)HALLMARK E2F TARGETS	0	0	1	1	0	0	0	0	0	1	0	1	0	0	0	0	0	0	0	0	1
81035	COLEC12	1	0	81035	Gene_ID	H. sapiens	81035	H. sapiens	COLEC12	collectin subfamily member 12	GO:0034138 toll-like receptor 3 signaling pathway;GO:0060355 positive regulation of cell adhesion molecule production;GO:0071360 cellular response to exogenous dsRNA			Cell Junctions;Golgi apparatus;Vesicles(Approved)		(M5880)NABA ECM AFFILIATED; (M5885)NABA MATRISOME ASSOCIATED; (M5889)NABA MATRISOME		0	0	0	0	0	0	0	0	0	0	0	0	0	0	0	0	0	0	0	0	1
22824	HSPA4L	1	0	22824	Gene_ID	H. sapiens	22824	H. sapiens	HSPA4L	heat shock protein family A (Hsp70) member 4 like	GO:0006986 response to unfolded protein;GO:0035966 response to topologically incorrect protein;GO:0006457 protein folding			Centrosome;Cytosol(Approved)			(M5951)HALLMARK SPERMATOGENESIS; (M5939)HALLMARK P53 PATHWAY; (M5907)HALLMARK ESTROGEN RESPONSE LATE	0	0	0	0	0	0	0	0	0	0	0	0	0	0	0	0	0	0	0	0	1
57721	METTL14	0	1	57721	Gene_ID	H. sapiens	57721	H. sapiens	METTL14	methyltransferase like 14	GO:0021861 forebrain radial glial cell differentiation;GO:0061157 mRNA destabilization;GO:0060019 radial glial cell differentiation		Enzymes/ENZYME proteins/Transferases	Nucleoplasm(Supported)				0	0	0	0	0	0	0	0	0	0	0	0	0	0	0	0	0	0	0	0	1
1545	CYP1B1	1	0	1545	Gene_ID	H. sapiens	1545	H. sapiens	CYP1B1	cytochrome P450 family 1 subfamily B member 1	GO:0061304 retinal blood vessel morphogenesis;GO:0097267 omega-hydroxylase P450 pathway;GO:0002930 trabecular meshwork development		Enzymes/ENZYME proteins/Oxidoreductases	Mitochondria(Uncertain)	2-Methoxyestradiol (Oxygen binding)			0	0	0	0	0	1	0	0	0	0	0	0	1	0	0	0	0	0	1	0	1
8301	PICALM	0	1	8301	Gene_ID	H. sapiens	8301	H. sapiens	PICALM	phosphatidylinositol binding clathrin assembly protein	GO:1902963 negative regulation of metalloendopeptidase activity involved in amyloid precursor protein catabolic process;GO:1902962 regulation of metalloendopeptidase activity involved in amyloid precursor protein catabolic process;GO:1904684 negative regulation of metalloendopeptidase activity			Vesicles(Supported)			(M5945)HALLMARK HEME METABOLISM	0	0	0	0	0	1	0	0	0	0	0	0	0	0	1	0	0	0	0	1	1
5327	PLAT	0	1	5327	Gene_ID	H. sapiens	5327	H. sapiens	PLAT	plasminogen activator, tissue type	GO:0099183 trans-synaptic signaling by BDNF, modulating synaptic transmission;GO:0042730 fibrinolysis;GO:0099191 trans-synaptic signaling by BDNF		Enzymes/{ENZYME proteins/Hydrolases,Peptidases/Serine-type peptidases}	Actin filaments(Approved)	Urokinase (Serine-type endopeptidase activity);Aminocaproic Acid (Serine-type endopeptidase activity);Ibuprofen (Serine-type endopeptidase activity);Iloprost (Serine-type endopeptidase activity);C1 Esterase Inhibitor (Human) (Serine-type endopeptidase activity);5-(DIMETHYLAMINO)-2-NAPHTHALENESULFONIC ACID (Serine-type endopeptidase activity);C1 Esterase Inhibitor (Recombinant) (Serine-type endope…	(M169)PID INTEGRIN2 PATHWAY; (M159)PID AMB2 NEUTROPHILS PATHWAY; (M3468)NABA ECM REGULATORS	(M5946)HALLMARK COAGULATION; (M5902)HALLMARK APOPTOSIS; (M5921)HALLMARK COMPLEMENT	0	0	0	0	0	0	0	0	0	0	0	0	0	0	0	0	0	1	0	0	1
51230	PHF20	0	1	51230	Gene_ID	H. sapiens	51230	H. sapiens	PHF20	PHD finger protein 20	GO:0043982 histone H4-K8 acetylation;GO:0043981 histone H4-K5 acetylation;GO:0043984 histone H4-K16 acetylation			Nucleoplasm(Enhanced)Nuclear membrane(Supported)Cytosol(Uncertain)				1	0	0	0	0	0	0	0	0	0	0	0	0	0	0	0	0	0	0	0	1
5293	PIK3CD	0	1	5293	Gene_ID	H. sapiens	5293	H. sapiens	PIK3CD	phosphatidylinositol-4,5-bisphosphate 3-kinase catalytic subunit delta	GO:0033031 positive regulation of neutrophil apoptotic process;GO:0033029 regulation of neutrophil apoptotic process;GO:0035754 B cell chemotaxis	Atypical: PI3/PI4-kinase family	Enzymes/ENZYME proteins/Transferases;RAS pathway related proteins	Cytokinetic bridge;Vesicles(Approved)	Caffeine (Phosphatidylinositol-4,5-bisphosphate 3-kinase activity);XL765 (Phosphatidylinositol-4,5-bisphosphate 3-kinase activity);2-((9H-PURIN-6-YLTHIO)METHYL)-5-CHLORO-3-(2-METHOXYPHENYL)QUINAZOLIN-4(3H)-ONE (Phosphatidylinositol-4,5-bisphosphate 3-kinase activity)	(M18895)SA TRKA RECEPTOR; (M12771)SA PTEN PATHWAY; (M1718)SIG IL4RECEPTOR IN B LYPHOCYTES	(M5942)HALLMARK UV RESPONSE DN	0	0	0	0	0	0	0	0	0	0	0	0	1	0	0	0	0	0	0	1	1
56255	TMX4	0	1	56255	Gene_ID	H. sapiens	56255	H. sapiens	TMX4	thioredoxin related transmembrane protein 4	GO:0045454 cell redox homeostasis;GO:0019725 cellular homeostasis;GO:0055114 oxidation-reduction process			Nuclear membrane(Supported)				0	0	0	0	0	0	0	0	0	0	0	0	0	0	0	0	0	0	0	0	1
6626	SNRPA	0	1	6626	Gene_ID	H. sapiens	6626	H. sapiens	SNRPA	small nuclear ribonucleoprotein polypeptide A	GO:1900363 regulation of mRNA polyadenylation;GO:0031440 regulation of mRNA 3'-end processing;GO:0006378 mRNA polyadenylation			Nucleoplasm(Enhanced)	Malonic acid (U1 snrna binding)		(M5926)HALLMARK MYC TARGETS V1	0	0	0	0	0	0	0	0	0	0	0	0	0	0	0	0	0	0	0	0	1
2305	FOXM1	1	0	2305	Gene_ID	H. sapiens	2305	H. sapiens	FOXM1	forkhead box M1	GO:0006978 DNA damage response, signal transduction by p53 class mediator resulting in transcription of p21 class mediator;GO:2000781 positive regulation of double-strand break repair;GO:0032873 negative regulation of stress-activated MAPK cascade		Transcription factors/Helix-turn-helix domains	Nucleoli;Nucleus(Supported)Cytosol(Uncertain)		(M176)PID FOXM1 PATHWAY		1	0	1	0	1	0	0	0	0	1	0	1	0	0	0	0	0	0	0	0	1
100505633	LINC01133	0	1	100505633	Gene_ID	H. sapiens	100505633	H. sapiens	LINC01133	long intergenic non-protein coding RNA 1133								0	0	0	0	0	0	0	0	0	0	0	0	0	0	0	0	0	0	0	0	1
2250	FGF5	0	1	2250	Gene_ID	H. sapiens	2250	H. sapiens	FGF5	fibroblast growth factor 5	GO:0023019 signal transduction involved in regulation of gene expression;GO:0008543 fibroblast growth factor receptor signaling pathway;GO:0051897 positive regulation of protein kinase B signaling		RAS pathway related proteins	Nucleoli fibrillar center;Nucleus(Supported)Cytosol(Approved)		(M5883)NABA SECRETED FACTORS; (M5885)NABA MATRISOME ASSOCIATED; (M5889)NABA MATRISOME		0	1	0	0	0	0	0	0	0	0	0	0	0	0	0	0	1	0	0	0	1
79642	ARSJ	0	1	79642	Gene_ID	H. sapiens	79642	H. sapiens	ARSJ	arylsulfatase family member J				Actin filaments(Supported)Nucleoli(Approved)				0	0	0	0	0	0	0	0	0	0	0	0	0	0	0	0	0	0	0	0	1
10613	ERLIN1	0	1	10613	Gene_ID	H. sapiens	10613	H. sapiens	ERLIN1	ER lipid raft associated 1	GO:0045541 negative regulation of cholesterol biosynthetic process;GO:0106119 negative reguation of sterol biosynthetic process;GO:0090206 negative regulation of cholesterol metabolic process			Endoplasmic reticulum(Supported)				0	0	0	0	0	0	0	0	0	0	0	0	0	0	0	0	0	0	0	0	1
1307	COL16A1	1	0	1307	Gene_ID	H. sapiens	1307	H. sapiens	COL16A1	collagen type XVI alpha 1 chain	GO:0051894 positive regulation of focal adhesion assembly;GO:0051893 regulation of focal adhesion assembly;GO:1903393 positive regulation of adherens junction organization			Cytosol;Golgi apparatus;Plasma membrane(Approved)		(M3005)NABA COLLAGENS; (M198)PID SYNDECAN 1 PATHWAY; (M160)PID AVB3 INTEGRIN PATHWAY	(M5915)HALLMARK APICAL JUNCTION; (M5930)HALLMARK EPITHELIAL MESENCHYMAL TRANSITION	0	0	0	0	0	1	0	0	0	0	0	0	0	0	0	0	0	0	1	0	1
51382	ATP6V1D	0	1	51382	Gene_ID	H. sapiens	51382	H. sapiens	ATP6V1D	ATPase H+ transporting V1 subunit D	GO:0090383 phagosome acidification;GO:0033572 transferrin transport;GO:0051452 intracellular pH reduction			Nucleoplasm(Approved)			(M5936)HALLMARK OXIDATIVE PHOSPHORYLATION; (M5924)HALLMARK MTORC1 SIGNALING	0	0	0	0	0	0	0	0	0	0	0	0	0	0	0	0	0	0	0	0	1
102465536	MIR6890	0	1	102465536	Gene_ID	H. sapiens	102465536	H. sapiens	MIR6890	microRNA 6890								0	0	0	0	0	0	0	0	0	0	0	0	0	0	0	0	0	0	0	0	1
22837	COBLL1	0	1	22837	Gene_ID	H. sapiens	22837	H. sapiens	COBLL1	cordon-bleu WH2 repeat protein like 1				Cell Junctions(Approved)				0	0	0	0	0	0	0	0	0	0	0	0	0	1	0	0	0	0	0	0	1
144455	E2F7	0	1	144455	Gene_ID	H. sapiens	144455	H. sapiens	E2F7	E2F transcription factor 7	GO:0006977 DNA damage response, signal transduction by p53 class mediator resulting in cell cycle arrest;GO:0072431 signal transduction involved in mitotic G1 DNA damage checkpoint;GO:0032877 positive regulation of DNA endoreduplication		Transcription factors/Helix-turn-helix domains	Nuclear speckles(Supported)		(M40)PID E2F PATHWAY		0	1	1	1	0	0	0	0	0	1	1	0	1	0	0	0	1	0	0	0	1
9241	NOG	0	1	9241	Gene_ID	H. sapiens	9241	H. sapiens	NOG	noggin	GO:0090190 positive regulation of branching involved in ureteric bud morphogenesis;GO:0060676 ureteric bud formation;GO:0090189 regulation of branching involved in ureteric bud morphogenesis					(M181)PID BMP PATHWAY	(M5896)HALLMARK TGF BETA SIGNALING	0	0	0	0	0	0	0	0	0	0	0	0	1	0	0	0	0	0	0	1	1
92667	MGME1	0	1	92667	Gene_ID	H. sapiens	92667	H. sapiens	MGME1	mitochondrial genome maintenance exonuclease 1	GO:0043504 mitochondrial DNA repair;GO:0006264 mitochondrial DNA replication;GO:0032042 mitochondrial DNA metabolic process			Mitochondria(Supported)				0	0	0	1	1	0	0	0	0	0	0	0	0	0	0	0	0	0	0	0	1
10973	ASCC3	0	1	10973	Gene_ID	H. sapiens	10973	H. sapiens	ASCC3	activating signal cointegrator 1 complex subunit 3	GO:0006307 DNA dealkylation involved in DNA repair;GO:0035510 DNA dealkylation;GO:0032508 DNA duplex unwinding		Enzymes/ENZYME proteins/Hydrolases	Cytosol(Supported)Golgi apparatus(Approved)				0	0	0	0	1	0	0	0	0	0	0	0	0	0	0	0	0	0	0	0	1
23164	MPRIP	0	1	23164	Gene_ID	H. sapiens	23164	H. sapiens	MPRIP	myosin phosphatase Rho interacting protein				Actin filaments(Supported)Cytosol(Approved)				0	0	0	0	0	0	0	0	0	0	0	0	0	0	0	0	0	0	0	0	1
8323	FZD6	0	1	8323	Gene_ID	H. sapiens	8323	H. sapiens	FZD6	frizzled class receptor 6	GO:0035880 embryonic nail plate morphogenesis;GO:0048105 establishment of body hair planar orientation;GO:1904693 midbrain morphogenesis		G-protein coupled receptors/{Family fz/smo receptors,GPCRs excl olfactory receptors}	Plasma membrane(Approved)		(M77)PID WNT SIGNALING PATHWAY; (M23)PID WNT NONCANONICAL PATHWAY; (M5493)WNT SIGNALING		0	0	0	0	0	0	0	0	0	0	0	0	0	0	0	0	0	0	0	0	1
1832	DSP	0	1	1832	Gene_ID	H. sapiens	1832	H. sapiens	DSP	desmoplakin	GO:0086073 bundle of His cell-Purkinje myocyte adhesion involved in cell communication;GO:0098911 regulation of ventricular cardiac muscle cell action potential;GO:0003223 ventricular compact myocardium morphogenesis			Cell Junctions(Enhanced)		(M142)PID AJDISS 2PATHWAY		0	0	0	0	0	1	0	0	0	0	0	0	0	0	0	0	0	0	0	0	1
374462	PTPRQ	1	0	374462	Gene_ID	H. sapiens	374462	H. sapiens	PTPRQ	protein tyrosine phosphatase receptor type Q	GO:0035335 peptidyl-tyrosine dephosphorylation;GO:0045598 regulation of fat cell differentiation;GO:0045444 fat cell differentiation			Cytosol(Approved)				0	0	0	0	0	0	0	0	0	0	0	0	0	0	0	0	0	0	0	0	1
5137	PDE1C	0	1	5137	Gene_ID	H. sapiens	5137	H. sapiens	PDE1C	phosphodiesterase 1C	GO:0007165 signal transduction;GO:0023052 signaling;GO:0007154 cell communication		Enzymes/ENZYME proteins/Hydrolases	Nucleus(Approved)				0	0	0	0	0	0	0	0	0	0	0	0	0	0	0	0	0	0	0	0	1
26064	RAI14	0	1	26064	Gene_ID	H. sapiens	26064	H. sapiens	RAI14	retinoic acid induced 14	GO:0007283 spermatogenesis;GO:0048232 male gamete generation;GO:0007276 gamete generation			Nucleus(Supported)Actin filaments(Approved)Cytosol(Uncertain)				0	0	0	0	0	0	0	0	0	0	0	0	0	0	0	0	0	0	0	0	1
323	APBB2	0	1	323	Gene_ID	H. sapiens	323	H. sapiens	APBB2	amyloid beta precursor protein binding family B member 2	GO:0007411 axon guidance;GO:0097485 neuron projection guidance;GO:0007409 axonogenesis			Mitochondria(Approved)			(M5942)HALLMARK UV RESPONSE DN	0	0	1	0	0	0	0	0	0	0	0	0	0	0	0	0	0	0	0	1	1
25797	QPCT	0	1	25797	Gene_ID	H. sapiens	25797	H. sapiens	QPCT	glutaminyl-peptide cyclotransferase	GO:0017186 peptidyl-pyroglutamic acid biosynthetic process, using glutaminyl-peptide cyclotransferase;GO:0018199 peptidyl-glutamine modification;GO:0043312 neutrophil degranulation		Enzymes/ENZYME proteins/Transferases	Cytosol(Approved)	1-benzylimidazole (Zinc ion binding);N-ACETYLHISTAMINE (Zinc ion binding);Glutamine t-butyl ester (Zinc ion binding)			0	0	0	0	0	0	0	0	0	0	0	0	0	0	0	0	0	0	0	0	1
4176	MCM7	1	0	4176	Gene_ID	H. sapiens	4176	H. sapiens	MCM7	minichromosome maintenance complex component 7	GO:0006267 pre-replicative complex assembly involved in nuclear cell cycle DNA replication;GO:1902299 pre-replicative complex assembly involved in cell cycle DNA replication;GO:0006268 DNA unwinding involved in DNA replication		Enzymes/ENZYME proteins/Hydrolases	Nucleoplasm(Enhanced)		(M46)PID ATR PATHWAY	(M5930)HALLMARK EPITHELIAL MESENCHYMAL TRANSITION; (M5925)HALLMARK E2F TARGETS; (M5926)HALLMARK MYC TARGETS V1	1	0	1	1	1	0	0	0	0	0	0	0	0	1	0	0	0	0	0	0	1
5874	RAB27B	1	0	5874	Gene_ID	H. sapiens	5874	H. sapiens	RAB27B	RAB27B, member RAS oncogene family	GO:0099641 anterograde axonal protein transport;GO:0032402 melanosome transport;GO:0099640 axo-dendritic protein transport			Cytosol;Golgi apparatus;Plasma membrane(Uncertain)				0	1	0	0	0	0	0	0	0	0	0	0	0	0	0	0	0	1	0	0	1
9265	CYTH3	0	1	9265	Gene_ID	H. sapiens	9265	H. sapiens	CYTH3	cytohesin 3	GO:0032012 regulation of ARF protein signal transduction;GO:0032011 ARF protein signal transduction;GO:0090162 establishment of epithelial cell polarity			Cytosol(Supported)Nucleoplasm(Uncertain)	Inositol 1,3,4,5-Tetrakisphosphate (Phosphatidylinositol-3,4,5-trisphosphate binding);Inositol-(1,3,4,5,6)-Pentakisphosphate (Phosphatidylinositol-3,4,5-trisphosphate binding)	(M86)PID ARF6 PATHWAY; (M1315)SIG PIP3 SIGNALING IN B LYMPHOCYTES; (M14532)ST PHOSPHOINOSITIDE 3 KINASE PATHWAY		0	0	0	0	0	0	0	0	0	0	0	0	0	0	0	0	0	0	1	0	1
301	ANXA1	0	1	301	Gene_ID	H. sapiens	301	H. sapiens	ANXA1	annexin A1	GO:0045629 negative regulation of T-helper 2 cell differentiation;GO:0045627 positive regulation of T-helper 1 cell differentiation;GO:0045625 regulation of T-helper 1 cell differentiation		Transporters/Transporter channels and pores	Cytosol;Nucleoplasm;Plasma membrane(Enhanced)	Amcinonide (Structural molecule activity);Hydrocortisone (Structural molecule activity);Dexamethasone (Structural molecule activity)	(M5880)NABA ECM AFFILIATED; (M5885)NABA MATRISOME ASSOCIATED; (M5889)NABA MATRISOME	(M5946)HALLMARK COAGULATION; (M5902)HALLMARK APOPTOSIS	0	0	1	0	1	1	0	0	0	0	1	0	1	0	0	0	0	0	1	1	1
8204	NRIP1	1	0	8204	Gene_ID	H. sapiens	8204	H. sapiens	NRIP1	nuclear receptor interacting protein 1	GO:0001543 ovarian follicle rupture;GO:0001542 ovulation from ovarian follicle;GO:0030521 androgen receptor signaling pathway			Nucleoli;Nucleus(Approved)	4-HYDROXY-N'-(4-ISOPROPYLBENZYL)BENZOHYDRAZIDE (Transcription corepressor activity)	(M207)PID RETINOIC ACID PATHWAY; (M285)PID HNF3A PATHWAY; (M58)PID AR PATHWAY	(M5906)HALLMARK ESTROGEN RESPONSE EARLY; (M5907)HALLMARK ESTROGEN RESPONSE LATE	0	0	0	0	0	0	0	0	0	0	0	0	0	0	0	0	0	0	0	0	1
29089	UBE2T	0	1	29089	Gene_ID	H. sapiens	29089	H. sapiens	UBE2T	ubiquitin conjugating enzyme E2 T	GO:0044314 protein K27-linked ubiquitination;GO:0035519 protein K29-linked ubiquitination;GO:0085020 protein K6-linked ubiquitination		Enzymes/ENZYME proteins/Transferases	Nucleoli;Nucleus(Approved)		(M1)PID FANCONI PATHWAY	(M5925)HALLMARK E2F TARGETS	0	0	0	0	1	0	0	0	0	0	0	0	0	0	0	0	0	0	0	0	1
5819	NECTIN2	0	1	5819	Gene_ID	H. sapiens	5819	H. sapiens	NECTIN2	nectin cell adhesion molecule 2	GO:0019064 fusion of virus membrane with host plasma membrane;GO:0060370 susceptibility to T cell mediated cytotoxicity;GO:0046814 coreceptor-mediated virion attachment to host cell		CD markers	Cell Junctions;Nucleoli fibrillar center(Approved)		(M72)PID NECTIN PATHWAY; (M232)PID ECADHERIN STABILIZATION PATHWAY	(M5915)HALLMARK APICAL JUNCTION	0	0	0	0	0	0	0	0	0	0	0	0	0	0	0	0	0	0	0	1	1
316	AOX1	0	1	316	Gene_ID	H. sapiens	316	H. sapiens	AOX1	aldehyde oxidase 1	GO:0009115 xanthine catabolic process;GO:0046110 xanthine metabolic process;GO:0006145 purine nucleobase catabolic process		Enzymes/ENZYME proteins/Oxidoreductases		Eniluracil (Xanthine dehydrogenase activity)		(M5934)HALLMARK XENOBIOTIC METABOLISM	0	0	0	0	0	0	0	0	0	0	0	0	0	0	0	0	0	0	0	0	1
8821	INPP4B	0	1	8821	Gene_ID	H. sapiens	8821	H. sapiens	INPP4B	inositol polyphosphate-4-phosphatase type II B	GO:0036092 phosphatidylinositol-3-phosphate biosynthetic process;GO:0006661 phosphatidylinositol biosynthetic process;GO:0043647 inositol phosphate metabolic process		Enzymes/ENZYME proteins/Hydrolases	Centrosome(Approved)			(M5908)HALLMARK ANDROGEN RESPONSE; (M5942)HALLMARK UV RESPONSE DN	0	0	0	0	0	0	0	0	0	0	0	0	0	0	0	0	0	0	0	0	1
55859	BEX1	1	0	55859	Gene_ID	H. sapiens	55859	H. sapiens	BEX1	brain expressed X-linked 1	GO:0051091 positive regulation of DNA-binding transcription factor activity;GO:0051090 regulation of DNA-binding transcription factor activity;GO:0045944 positive regulation of transcription by RNA polymerase II					(M153)PID P75 NTR PATHWAY		0	0	0	0	0	0	0	0	0	0	0	0	0	0	0	0	0	0	0	0	1
994	CDC25B	1	0	994	Gene_ID	H. sapiens	994	H. sapiens	CDC25B	cell division cycle 25B	GO:0110032 positive regulation of G2/MI transition of meiotic cell cycle;GO:0110030 regulation of G2/MI transition of meiotic cell cycle;GO:1901995 positive regulation of meiotic cell cycle phase transition		Enzymes/ENZYME proteins/Hydrolases	Mitotic spindle;Vesicles(Supported)	Cysteinesulfonic Acid (Protein tyrosine phosphatase activity)	(M10154)SA G2 AND M PHASES; (M199)PID P38 MK2 PATHWAY; (M242)PID AURORA A PATHWAY	(M5902)HALLMARK APOPTOSIS; (M5925)HALLMARK E2F TARGETS; (M5901)HALLMARK G2M CHECKPOINT	1	1	1	1	0	0	1	0	0	0	1	1	0	0	0	1	1	0	0	0	1
23065	EMC1	1	0	23065	Gene_ID	H. sapiens	23065	H. sapiens	EMC1	ER membrane protein complex subunit 1				Cytokinetic bridge;Microtubules(Approved)				0	0	0	0	0	0	0	0	0	0	0	0	0	0	0	0	0	0	0	0	1
5230	PGK1	0	1	5230	Gene_ID	H. sapiens	5230	H. sapiens	PGK1	phosphoglycerate kinase 1	GO:0061621 canonical glycolysis;GO:0061620 glycolytic process through glucose-6-phosphate;GO:1903862 positive regulation of oxidative phosphorylation		Enzymes/ENZYME proteins/Transferases		Adenosine-5'-[Beta, Gamma-Methylene]Triphosphate (Phosphoglycerate kinase activity);3-Phosphoglyceric Acid (Phosphoglycerate kinase activity)	(M44)PID HIF2PATHWAY; (M255)PID HIF1 TFPATHWAY	(M5937)HALLMARK GLYCOLYSIS; (M5891)HALLMARK HYPOXIA; (M5924)HALLMARK MTORC1 SIGNALING	0	0	0	0	0	0	0	0	0	0	0	0	1	0	0	0	0	0	0	0	1
5621	PRNP	0	1	5621	Gene_ID	H. sapiens	5621	H. sapiens	PRNP	prion protein	GO:1905664 regulation of calcium ion import across plasma membrane;GO:0098703 calcium ion import across plasma membrane;GO:0050860 negative regulation of T cell receptor signaling pathway		CD markers;Transporters/Transporter channels and pores	Cytosol;Nuclear membrane;Vesicles(Approved)	Tetracycline (Tubulin binding)	(M33)PID GLYPICAN 1PATHWAY	(M5938)HALLMARK REACTIVE OXIGEN SPECIES PATHWAY; (M5947)HALLMARK IL2 STAT5 SIGNALING; (M5909)HALLMARK MYOGENESIS	0	0	1	0	0	0	0	0	0	0	0	0	0	0	1	0	0	0	1	1	1
51375	SNX7	0	1	51375	Gene_ID	H. sapiens	51375	H. sapiens	SNX7	sorting nexin 7	GO:0015031 protein transport;GO:0015833 peptide transport;GO:0042886 amide transport			Cytosol;Nucleoli fibrillar center(Approved)				0	0	0	0	0	0	0	0	0	0	0	0	0	0	0	0	0	0	0	0	1
60312	AFAP1	0	1	60312	Gene_ID	H. sapiens	60312	H. sapiens	AFAP1	actin filament associated protein 1	GO:0051493 regulation of cytoskeleton organization;GO:0033043 regulation of organelle organization;GO:0007010 cytoskeleton organization			Actin filaments(Supported)Cytosol;Focal adhesion sites(Approved)				0	0	0	0	0	1	0	0	0	0	0	0	0	0	0	0	0	0	0	0	1
146909	KIF18B	1	0	146909	Gene_ID	H. sapiens	146909	H. sapiens	KIF18B	kinesin family member 18B	GO:0007019 microtubule depolymerization;GO:0051261 protein depolymerization;GO:0031109 microtubule polymerization or depolymerization			Cytosol;Microtubule ends;Nucleus(Supported)			(M5925)HALLMARK E2F TARGETS	0	1	0	0	0	1	0	0	0	0	0	0	0	0	0	0	1	1	0	0	1
6389	SDHA	0	1	6389	Gene_ID	H. sapiens	6389	H. sapiens	SDHA	succinate dehydrogenase complex flavoprotein subunit A	GO:0006121 mitochondrial electron transport, succinate to ubiquinone;GO:0042775 mitochondrial ATP synthesis coupled electron transport;GO:0006105 succinate metabolic process		Citric acid cycle related proteins;Enzymes/ENZYME proteins/Oxidoreductases	Mitochondria(Enhanced)	Succinic acid (Succinate dehydrogenase activity);2-Hexyloxy-6-Hydroxymethyl-Tetrahydro-Pyran-3,4,5-Triol (Succinate dehydrogenase activity);Carboxin (Succinate dehydrogenase activity);Thenoyltrifluoroacetone (Succinate dehydrogenase activity);UBIQUINONE-1 (Succinate dehydrogenase activity)		(M5935)HALLMARK FATTY ACID METABOLISM; (M5936)HALLMARK OXIDATIVE PHOSPHORYLATION	0	0	0	0	0	0	0	0	0	0	0	0	0	0	0	0	0	0	0	0	1
1122	CHML	0	1	1122	Gene_ID	H. sapiens	1122	H. sapiens	CHML	CHM like Rab escort protein	GO:0018344 protein geranylgeranylation;GO:0018342 protein prenylation;GO:0097354 prenylation			Cytosol(Enhanced)Nucleoplasm(Approved)				0	0	0	0	0	0	0	0	0	0	0	0	0	0	0	0	0	0	0	0	1
11096	ADAMTS5	1	0	11096	Gene_ID	H. sapiens	11096	H. sapiens	ADAMTS5	ADAM metallopeptidase with thrombospondin type 1 motif 5	GO:0044691 tooth eruption;GO:0120163 negative regulation of cold-induced thermogenesis;GO:0022617 extracellular matrix disassembly			Nucleoplasm(Supported)	Batimastat (Zinc ion binding);(2R)-N~4~-hydroxy-2-(3-hydroxybenzyl)-N~1~-[(1S,2R)-2-hydroxy-2,3-dihydro-1H-inden-1-yl]butanediamide (Zinc ion binding);N-hydroxy-4-({4-[4-(trifluoromethyl)phenoxy]phenyl}sulfonyl)tetrahydro-2H-pyran-4-carboxamide (Zinc ion binding)	(M3468)NABA ECM REGULATORS; (M5885)NABA MATRISOME ASSOCIATED; (M5889)NABA MATRISOME	(M5915)HALLMARK APICAL JUNCTION	0	0	0	0	0	0	0	0	0	0	0	0	0	0	0	0	0	0	0	0	1
128239	IQGAP3	1	0	128239	Gene_ID	H. sapiens	128239	H. sapiens	IQGAP3	IQ motif containing GTPase activating protein 3	GO:0033601 positive regulation of mammary gland epithelial cell proliferation;GO:0033599 regulation of mammary gland epithelial cell proliferation;GO:0033598 mammary gland epithelial cell proliferation			Nucleoli;Nucleus(Approved)		(M278)PID RAC1 PATHWAY; (M81)PID CDC42 PATHWAY		1	0	1	0	0	0	0	0	0	0	0	0	1	0	0	0	0	0	0	0	1
7508	XPC	1	0	7508	Gene_ID	H. sapiens	7508	H. sapiens	XPC	XPC complex subunit, DNA damage recognition and repair factor	GO:1990731 UV-damage excision repair, DNA incision;GO:0000720 pyrimidine dimer repair by nucleotide-excision repair;GO:0031573 intra-S DNA damage checkpoint			Nucleus;Plasma membrane(Enhanced)			(M5898)HALLMARK DNA REPAIR; (M5939)HALLMARK P53 PATHWAY	0	0	1	0	1	0	0	0	0	0	0	0	0	1	0	0	0	0	0	0	1
22998	LIMCH1	0	1	22998	Gene_ID	H. sapiens	22998	H. sapiens	LIMCH1	LIM and calponin homology domains 1	GO:0051496 positive regulation of stress fiber assembly;GO:0060327 cytoplasmic actin-based contraction involved in cell motility;GO:0051492 regulation of stress fiber assembly			Actin filaments(Approved)				0	0	0	0	0	1	0	0	0	0	0	0	0	0	0	0	0	0	1	0	1
6993	DYNLT1	0	1	6993	Gene_ID	H. sapiens	6993	H. sapiens	DYNLT1	dynein light chain Tctex-type 1	GO:0075521 microtubule-dependent intracellular transport of viral material towards nucleus;GO:0075519 microtubule-dependent intracellular transport of viral material;GO:0075606 transport of viral material towards nucleus			Nucleoplasm(Supported)		(M163)PID LIS1 PATHWAY; (M187)PID TRKR PATHWAY		0	1	0	0	0	1	0	0	0	0	0	0	0	0	0	0	0	0	0	1	1
332	BIRC5	1	0	332	Gene_ID	H. sapiens	332	H. sapiens	BIRC5	baculoviral IAP repeat containing 5	GO:0043154 negative regulation of cysteine-type endopeptidase activity involved in apoptotic process;GO:2000117 negative regulation of cysteine-type endopeptidase activity;GO:0090307 mitotic spindle assembly			Cytokinetic bridge(Enhanced)	LY2181308 (Zinc ion binding)	(M242)PID AURORA A PATHWAY; (M14)PID AURORA B PATHWAY; (M176)PID FOXM1 PATHWAY	(M5893)HALLMARK MITOTIC SPINDLE; (M5925)HALLMARK E2F TARGETS; (M5901)HALLMARK G2M CHECKPOINT	1	1	0	0	0	0	0	0	1	0	0	0	0	0	0	0	0	0	0	0	1
23180	RFTN1	0	1	23180	Gene_ID	H. sapiens	23180	H. sapiens	RFTN1	raftlin, lipid raft linker 1	GO:0034138 toll-like receptor 3 signaling pathway;GO:0032596 protein transport into membrane raft;GO:0002457 T cell antigen processing and presentation							0	0	0	0	0	0	0	0	0	0	0	0	0	0	0	0	0	0	0	0	1
113	ADCY7	1	0	113	Gene_ID	H. sapiens	113	H. sapiens	ADCY7	adenylate cyclase 7	GO:0034199 activation of protein kinase A activity;GO:0006171 cAMP biosynthetic process;GO:1900016 negative regulation of cytokine production involved in inflammatory response		Enzymes/ENZYME proteins/Lyases	Cytosol(Approved)		(M56)PID LPA4 PATHWAY; (M8)PID ENDOTHELIN PATHWAY; (M15)PID LYSOPHOSPHOLIPID PATHWAY		0	0	0	0	0	0	0	0	0	0	0	0	0	0	0	0	0	0	0	0	1
3070	HELLS	0	1	3070	Gene_ID	H. sapiens	3070	H. sapiens	HELLS	helicase, lymphoid specific	GO:0031508 pericentric heterochromatin assembly;GO:0006346 methylation-dependent chromatin silencing;GO:0031507 heterochromatin assembly			Golgi apparatus;Nucleus;Vesicles(Approved)		(M236)PID DELTA NP63 PATHWAY	(M5925)HALLMARK E2F TARGETS	0	1	0	0	1	0	0	0	0	0	0	0	0	1	0	0	0	0	0	0	1
56648	EIF5A2	0	1	56648	Gene_ID	H. sapiens	56648	H. sapiens	EIF5A2	eukaryotic translation initiation factor 5A2	GO:0010509 polyamine homeostasis;GO:0045905 positive regulation of translational termination;GO:0045901 positive regulation of translational elongation		Transporters/Transporter channels and pores	Vesicles(Supported)				0	0	0	0	0	0	0	0	0	0	0	0	0	0	0	0	0	0	0	0	1
23603	CORO1C	0	1	23603	Gene_ID	H. sapiens	23603	H. sapiens	CORO1C	coronin 1C	GO:2000394 positive regulation of lamellipodium morphogenesis;GO:0051895 negative regulation of focal adhesion assembly;GO:0044387 negative regulation of protein kinase activity by regulation of protein phosphorylation							0	0	0	0	0	1	0	0	0	0	0	0	1	0	1	0	0	0	1	1	1
100616282	MIR4738	0	1	100616282	Gene_ID	H. sapiens	100616282	H. sapiens	MIR4738	microRNA 4738								0	0	0	0	0	0	0	0	0	0	0	0	0	0	0	0	0	0	0	0	1
29969	MDFIC	0	1	29969	Gene_ID	H. sapiens	29969	H. sapiens	MDFIC	MyoD family inhibitor domain containing	GO:0007257 activation of JUN kinase activity;GO:0042308 negative regulation of protein import into nucleus;GO:0050434 positive regulation of viral transcription			Nucleoplasm(Supported)Golgi apparatus(Approved)		(M223)PID BETA CATENIN NUC PATHWAY		0	0	0	0	0	0	0	0	0	1	0	0	0	0	0	0	0	0	0	0	1
5754	PTK7	1	0	5754	Gene_ID	H. sapiens	5754	H. sapiens	PTK7	protein tyrosine kinase 7 (inactive)	GO:0090179 planar cell polarity pathway involved in neural tube closure;GO:0090178 regulation of establishment of planar polarity involved in neural tube closure;GO:0090177 establishment of planar polarity involved in neural tube closure	Tyr protein kinase family	Enzymes/Kinases/Tyr protein kinases					0	0	0	0	0	1	0	0	0	0	0	0	1	0	0	0	0	0	0	1	1
3460	IFNGR2	0	1	3460	Gene_ID	H. sapiens	3460	H. sapiens	IFNGR2	interferon gamma receptor 2	GO:0060334 regulation of interferon-gamma-mediated signaling pathway;GO:0060330 regulation of response to interferon-gamma;GO:0060333 interferon-gamma-mediated signaling pathway			Golgi apparatus;Nucleoplasm(Approved)	Interferon gamma-1b (Interferon-gamma receptor activity)		(M5896)HALLMARK TGF BETA SIGNALING; (M5897)HALLMARK IL6 JAK STAT3 SIGNALING; (M5932)HALLMARK INFLAMMATORY RESPONSE	0	0	0	0	0	0	0	0	0	0	0	0	0	0	0	0	0	0	0	0	1
29115	SAP30BP	0	1	29115	Gene_ID	H. sapiens	29115	H. sapiens	SAP30BP	SAP30 binding protein	GO:0010942 positive regulation of cell death;GO:0006915 apoptotic process;GO:0010941 regulation of cell death			Nucleoplasm(Enhanced)				0	0	0	0	0	0	0	0	0	0	0	0	0	0	0	0	0	0	0	0	1
10581	IFITM2	1	0	10581	Gene_ID	H. sapiens	10581	H. sapiens	IFITM2	interferon induced transmembrane protein 2	GO:0046597 negative regulation of viral entry into host cell;GO:0046596 regulation of viral entry into host cell;GO:0045071 negative regulation of viral genome replication		Transporters/Accessory Factors Involved in Transport				(M5911)HALLMARK INTERFERON ALPHA RESPONSE; (M5913)HALLMARK INTERFERON GAMMA RESPONSE	0	0	0	0	0	0	0	0	0	0	0	0	0	0	0	0	0	0	0	0	1
56034	PDGFC	0	1	56034	Gene_ID	H. sapiens	56034	H. sapiens	PDGFC	platelet derived growth factor C	GO:0007171 activation of transmembrane receptor protein tyrosine kinase activity;GO:0031954 positive regulation of protein autophosphorylation;GO:0014068 positive regulation of phosphatidylinositol 3-kinase signaling		RAS pathway related proteins	Cytosol;Plasma membrane(Supported)		(M5883)NABA SECRETED FACTORS; (M5885)NABA MATRISOME ASSOCIATED; (M5889)NABA MATRISOME	(M5897)HALLMARK IL6 JAK STAT3 SIGNALING	0	1	0	0	0	0	0	0	0	0	0	0	1	0	0	0	1	0	0	0	1
3190	HNRNPK	0	1	3190	Gene_ID	H. sapiens	3190	H. sapiens	HNRNPK	heterogeneous nuclear ribonucleoprotein K	GO:0045716 positive regulation of low-density lipoprotein particle receptor biosynthetic process;GO:1902165 regulation of intrinsic apoptotic signaling pathway in response to DNA damage by p53 class mediator;GO:0045714 regulation of low-density lipoprotein particle receptor biosynthetic process			Nucleoplasm(Enhanced)				0	0	0	0	0	0	0	0	0	1	0	0	0	0	0	0	0	0	0	0	1
9682	KDM4A	1	0	9682	Gene_ID	H. sapiens	9682	H. sapiens	KDM4A	lysine demethylase 4A	GO:0070544 histone H3-K36 demethylation;GO:0033169 histone H3-K9 demethylation;GO:0070076 histone lysine demethylation			Nucleoli fibrillar center(Supported)				0	0	0	0	1	0	0	0	0	0	0	0	0	1	0	0	0	0	0	0	1
598	BCL2L1	0	1	598	Gene_ID	H. sapiens	598	H. sapiens	BCL2L1	BCL2 like 1	GO:0019050 suppression by virus of host apoptotic process;GO:0039526 modulation by virus of host apoptotic process;GO:0033668 negative regulation by symbiont of host apoptotic process		RAS pathway related proteins;Transporters/Transporter channels and pores	Mitochondria(Approved)	4'-FLUORO-1,1'-BIPHENYL-4-CARBOXYLIC ACID (Protein kinase binding)	(M13096)SA PROGRAMMED CELL DEATH; (M182)PID IL3 PATHWAY; (M234)PID IL2 STAT5 PATHWAY	(M5902)HALLMARK APOPTOSIS; (M5947)HALLMARK IL2 STAT5 SIGNALING	0	1	1	0	0	0	0	0	0	1	0	0	0	0	1	0	1	0	0	1	1
7411	VBP1	0	1	7411	Gene_ID	H. sapiens	7411	H. sapiens	VBP1	VHL binding protein 1	GO:0007021 tubulin complex assembly;GO:0006457 protein folding;GO:0034622 cellular protein-containing complex assembly			Cytosol;Vesicles(Supported)			(M5926)HALLMARK MYC TARGETS V1	0	0	0	0	0	0	0	0	0	0	0	0	0	0	0	0	0	0	0	0	1
8125	ANP32A	0	1	8125	Gene_ID	H. sapiens	8125	H. sapiens	ANP32A	acidic nuclear phosphoprotein 32 family member A	GO:0043488 regulation of mRNA stability;GO:0061013 regulation of mRNA catabolic process;GO:0043487 regulation of RNA stability			Nucleoplasm(Enhanced)Centrosome;Cytosol(Supported)		(M200)PID ERA GENOMIC PATHWAY		0	0	0	0	0	0	0	0	0	0	0	0	0	0	0	0	0	0	0	0	1
9823	ARMCX2	0	1	9823	Gene_ID	H. sapiens	9823	H. sapiens	ARMCX2	armadillo repeat containing X-linked 2				Mitochondria;Nucleus(Approved)				0	0	0	0	0	0	0	0	0	0	0	0	0	0	0	0	0	0	0	0	1
55166	CENPQ	0	1	55166	Gene_ID	H. sapiens	55166	H. sapiens	CENPQ	centromere protein Q	GO:1905342 positive regulation of protein localization to kinetochore;GO:1905340 regulation of protein localization to kinetochore;GO:0034080 CENP-A containing nucleosome assembly			Nucleoplasm(Enhanced)				1	1	0	0	1	0	0	0	0	0	0	0	0	1	0	0	0	0	0	0	1
340075	ARSI	1	0	340075	Gene_ID	H. sapiens	340075	H. sapiens	ARSI	arylsulfatase family member I				Golgi apparatus(Approved)				0	0	0	0	0	0	0	0	0	0	0	0	0	0	0	0	0	0	0	0	1
5756	TWF1	0	1	5756	Gene_ID	H. sapiens	5756	H. sapiens	TWF1	twinfilin actin binding protein 1	GO:0043538 regulation of actin phosphorylation;GO:0031289 actin phosphorylation;GO:0051016 barbed-end actin filament capping			Cytosol(Enhanced)				0	0	0	0	0	1	0	0	0	0	0	0	0	0	1	0	0	0	0	1	1
57157	PHTF2	0	1	57157	Gene_ID	H. sapiens	57157	H. sapiens	PHTF2	putative homeodomain transcription factor 2			Transcription factors/Helix-turn-helix domains	Cytosol;Nucleoplasm(Approved)			(M5947)HALLMARK IL2 STAT5 SIGNALING	0	0	0	0	0	0	0	0	0	0	0	0	0	0	0	0	0	0	0	0	1
8317	CDC7	0	1	8317	Gene_ID	H. sapiens	8317	H. sapiens	CDC7	cell division cycle 7	GO:0010571 positive regulation of nuclear cell cycle DNA replication;GO:0033262 regulation of nuclear cell cycle DNA replication;GO:0070317 negative regulation of G0 to G1 transition	Other	Enzymes/{ENZYME proteins/Transferases,Kinases}	Cytokinetic bridge;Mitotic spindle;Nucleoplasm(Supported)			(M5901)HALLMARK G2M CHECKPOINT	1	1	1	1	1	0	0	0	0	1	1	1	0	0	0	0	0	0	0	0	1
7027	TFDP1	0	1	7027	Gene_ID	H. sapiens	7027	H. sapiens	TFDP1	transcription factor Dp-1	GO:1900740 positive regulation of protein insertion into mitochondrial membrane involved in apoptotic signaling pathway;GO:1900739 regulation of protein insertion into mitochondrial membrane involved in apoptotic signaling pathway;GO:1901030 positive regulation of mitochondrial outer membrane permeabilization involved in apoptotic signaling pathway		Transcription factors/Helix-turn-helix domains	Cytosol;Nucleoplasm(Supported)		(M279)PID RB 1PATHWAY; (M40)PID E2F PATHWAY; (M2)PID SMAD2 3NUCLEAR PATHWAY	(M5901)HALLMARK G2M CHECKPOINT; (M5926)HALLMARK MYC TARGETS V1	1	0	1	1	0	1	0	0	0	1	1	0	0	0	0	0	0	0	0	0	1
90861	HN1L	0	1	90861	Gene_ID	H. sapiens	90861	H. sapiens	JPT2	Jupiter microtubule associated homolog 2				Cytosol;Plasma membrane(Enhanced)				0	0	0	0	0	0	0	0	0	0	0	0	0	0	0	0	0	0	0	0	1
79776	ZFHX4	1	0	79776	Gene_ID	H. sapiens	79776	H. sapiens	ZFHX4	zinc finger homeobox 4	GO:0000122 negative regulation of transcription by RNA polymerase II;GO:0045892 negative regulation of transcription, DNA-templated;GO:1903507 negative regulation of nucleic acid-templated transcription		Transcription factors/Helix-turn-helix domains	Nucleoli fibrillar center;Nucleoplasm(Approved)				0	0	0	0	0	0	0	0	0	0	0	0	0	0	0	0	0	0	0	0	1
30844	EHD4	0	1	30844	Gene_ID	H. sapiens	30844	H. sapiens	EHD4	EH domain containing 4	GO:0006907 pinocytosis;GO:0050731 positive regulation of peptidyl-tyrosine phosphorylation;GO:0032456 endocytic recycling			Plasma membrane(Approved)		(M270)PID MAPK TRK PATHWAY; (M187)PID TRKR PATHWAY		0	0	0	0	0	0	0	0	0	0	0	0	0	0	0	0	0	0	0	0	1
25841	ABTB2	0	1	25841	Gene_ID	H. sapiens	25841	H. sapiens	ABTB2	ankyrin repeat and BTB domain containing 2	GO:0097237 cellular response to toxic substance;GO:0009636 response to toxic substance;GO:0070887 cellular response to chemical stimulus			Nucleus(Supported)				0	0	0	0	0	0	0	0	0	0	0	0	0	0	0	0	0	0	0	0	1
57529	RGAG1	1	0	57529	Gene_ID	H. sapiens	57529	H. sapiens	RTL9	retrotransposon Gag like 9								0	0	0	0	0	0	0	0	0	0	0	0	0	0	0	0	0	0	0	0	1
4907	NT5E	0	1	4907	Gene_ID	H. sapiens	4907	H. sapiens	NT5E	5'-nucleotidase ecto	GO:0006196 AMP catabolic process;GO:0046086 adenosine biosynthetic process;GO:0009169 purine ribonucleoside monophosphate catabolic process		CD markers;Enzymes/ENZYME proteins/Hydrolases	Plasma membrane(Supported)Cytosol;Nucleoplasm(Approved)	Pentoxifylline (Nucleotide binding)	(M255)PID HIF1 TFPATHWAY	(M5947)HALLMARK IL2 STAT5 SIGNALING; (M5937)HALLMARK GLYCOLYSIS; (M5930)HALLMARK EPITHELIAL MESENCHYMAL TRANSITION	0	0	0	0	0	0	0	0	0	0	0	0	0	0	0	0	0	0	0	0	1
1021	CDK6	0	1	1021	Gene_ID	H. sapiens	1021	H. sapiens	CDK6	cyclin dependent kinase 6	GO:0045656 negative regulation of monocyte differentiation;GO:0021542 dentate gyrus development;GO:0045655 regulation of monocyte differentiation	CMGC Ser/Thr protein kinase family	Enzymes/{ENZYME proteins/Transferases,Kinases/CMGC Ser/Thr protein kinases}	Cytosol;Nucleoplasm(Supported)	Flavopiridol (Cyclin-dependent protein serine/threonine kinase activity);(2S)-2-({6-[(3-amino-5-chlorophenyl)amino]-9-isopropyl-9H-purin-2-yl}amino)-3-methylbutan-1-ol (Cyclin-dependent protein serine/threonine kinase activity);3,7,3',4'-TETRAHYDROXYFLAVONE (Cyclin-dependent protein serine/threonine kinase activity);Palbociclib (Cyclin-dependent protein serine/threonine kinase activity)	(M234)PID IL2 STAT5 PATHWAY; (M58)PID AR PATHWAY; (M279)PID RB 1PATHWAY	(M5919)HALLMARK HEDGEHOG SIGNALING; (M5908)HALLMARK ANDROGEN RESPONSE	1	1	1	1	0	0	0	0	0	1	0	0	1	0	0	0	0	0	1	0	1
8766	RAB11A	0	1	8766	Gene_ID	H. sapiens	8766	H. sapiens	RAB11A	RAB11A, member RAS oncogene family	GO:0098887 neurotransmitter receptor transport, endosome to postsynaptic membrane;GO:0099639 neurotransmitter receptor transport, endosome to plasma membrane;GO:0098969 neurotransmitter receptor transport to postsynaptic membrane			Microtubule organizing center;Vesicles(Enhanced)	5'-Guanosine-Diphosphate-Monothiophosphate (Syntaxin binding);Guanosine-5'-Diphosphate (Syntaxin binding)	(M120)PID ARF6 DOWNSTREAM PATHWAY; (M210)PID IL8 CXCR2 PATHWAY; (M99)PID TXA2PATHWAY		0	1	1	0	0	1	0	0	0	0	1	1	1	0	0	0	1	0	0	1	1
399947	C11orf87	0	1	399947	Gene_ID	H. sapiens	399947	H. sapiens	C11orf87	chromosome 11 open reading frame 87								0	0	0	0	0	0	0	0	0	0	0	0	0	0	0	0	0	0	0	0	1
4430	MYO1B	0	1	4430	Gene_ID	H. sapiens	4430	H. sapiens	MYO1B	myosin IB	GO:0030050 vesicle transport along actin filament;GO:0099515 actin filament-based transport;GO:0099518 vesicle cytoskeletal trafficking			Plasma membrane(Enhanced)				0	0	0	0	0	1	0	0	0	0	0	0	0	0	0	0	0	0	0	0	1
54407	SLC38A2	0	1	54407	Gene_ID	H. sapiens	54407	H. sapiens	SLC38A2	solute carrier family 38 member 2	GO:0031460 glycine betaine transport;GO:1903841 cellular response to arsenite(3-);GO:0015825 L-serine transport			Vesicles(Approved)			(M5908)HALLMARK ANDROGEN RESPONSE	0	0	0	0	0	0	0	0	0	1	0	0	0	0	0	0	0	0	0	0	1
9749	PHACTR2	0	1	9749	Gene_ID	H. sapiens	9749	H. sapiens	PHACTR2	phosphatase and actin regulator 2	GO:0032515 negative regulation of phosphoprotein phosphatase activity;GO:0002576 platelet degranulation;GO:0035308 negative regulation of protein dephosphorylation							0	0	0	0	0	0	0	0	0	0	0	0	0	0	0	0	0	1	0	0	1
116535	MRGPRF	1	0	116535	Gene_ID	H. sapiens	116535	H. sapiens	MRGPRF	MAS related GPR family member F	GO:0007186 G protein-coupled receptor signaling pathway;GO:0007165 signal transduction;GO:0023052 signaling		G-protein coupled receptors/GPCRs excl olfactory receptors;Transporters	Plasma membrane(Supported)Nuclear membrane(Approved)				0	0	0	0	0	0	0	0	0	0	0	0	0	0	0	0	0	0	0	0	1
50863	NTM	1	0	50863	Gene_ID	H. sapiens	50863	H. sapiens	NTM	neurotrimin	GO:0008038 neuron recognition;GO:0008037 cell recognition;GO:0048666 neuron development						(M5930)HALLMARK EPITHELIAL MESENCHYMAL TRANSITION	0	0	0	0	0	0	0	0	0	0	0	0	0	0	0	0	0	0	0	0	1
70	ACTC1	0	1	70	Gene_ID	H. sapiens	70	H. sapiens	ACTC1	actin alpha cardiac muscle 1	GO:0030240 skeletal muscle thin filament assembly;GO:0090131 mesenchyme migration;GO:0055003 cardiac myofibril assembly						(M5956)HALLMARK KRAS SIGNALING DN; (M5909)HALLMARK MYOGENESIS; (M5915)HALLMARK APICAL JUNCTION	0	0	0	0	0	1	0	0	0	0	0	0	1	0	0	0	0	0	0	0	1
54874	FNBP1L	1	0	54874	Gene_ID	H. sapiens	54874	H. sapiens	FNBP1L	formin binding protein 1 like	GO:0051491 positive regulation of filopodium assembly;GO:0030050 vesicle transport along actin filament;GO:0097320 plasma membrane tubulation			Cytosol(Supported)				0	0	0	0	0	1	0	0	0	0	0	1	0	0	0	0	0	0	0	1	1
3835	KIF22	1	0	3835	Gene_ID	H. sapiens	3835	H. sapiens	KIF22	kinesin family member 22	GO:0019886 antigen processing and presentation of exogenous peptide antigen via MHC class II;GO:0007080 mitotic metaphase plate congression;GO:0002495 antigen processing and presentation of peptide antigen via MHC class II			Nuclear speckles(Approved)			(M5893)HALLMARK MITOTIC SPINDLE; (M5925)HALLMARK E2F TARGETS; (M5901)HALLMARK G2M CHECKPOINT	0	1	0	0	1	0	0	0	0	0	0	0	0	0	0	0	0	1	0	0	1
6453	ITSN1	0	1	6453	Gene_ID	H. sapiens	6453	H. sapiens	ITSN1	intersectin 1	GO:0060124 positive regulation of growth hormone secretion;GO:2001288 positive regulation of caveolin-mediated endocytosis;GO:1905274 regulation of modification of postsynaptic actin cytoskeleton			Plasma membrane(Supported)		(M83)PID CDC42 REG PATHWAY; (M62)PID EPHB FWD PATHWAY; (M214)PID ERBB1 INTERNALIZATION PATHWAY	(M5893)HALLMARK MITOTIC SPINDLE; (M5905)HALLMARK ADIPOGENESIS	1	0	0	0	0	0	0	0	0	0	0	0	0	0	0	0	0	0	0	1	1
10290	SPEG	1	0	10290	Gene_ID	H. sapiens	10290	H. sapiens	SPEG	striated muscle enriched protein kinase	GO:0007517 muscle organ development;GO:0042692 muscle cell differentiation;GO:0008285 negative regulation of cell proliferation	CAMK Ser/Thr protein kinase family	Enzymes/{ENZYME proteins/Transferases,Kinases/CAMK Ser/Thr protein kinases}	Vesicles(Approved)			(M5909)HALLMARK MYOGENESIS; (M5915)HALLMARK APICAL JUNCTION	0	0	0	0	0	0	0	0	0	0	0	0	0	0	0	0	0	0	0	0	1
7357	UGCG	0	1	7357	Gene_ID	H. sapiens	7357	H. sapiens	UGCG	UDP-glucose ceramide glucosyltransferase	GO:0006679 glucosylceramide biosynthetic process;GO:0046476 glycosylceramide biosynthetic process;GO:0006678 glucosylceramide metabolic process		Enzymes/ENZYME proteins/Transferases;Transporters		Miglustat (Ceramide glucosyltransferase activity);Genz-112638 (Ceramide glucosyltransferase activity);Eliglustat (Ceramide glucosyltransferase activity)	(M143)PID IL2 PI3K PATHWAY	(M5906)HALLMARK ESTROGEN RESPONSE EARLY	0	0	0	0	0	0	0	0	0	0	0	0	0	0	0	0	0	0	0	0	1
5641	LGMN	0	1	5641	Gene_ID	H. sapiens	5641	H. sapiens	LGMN	legumain	GO:2001028 positive regulation of endothelial cell chemotaxis;GO:1900273 positive regulation of long-term synaptic potentiation;GO:0090026 positive regulation of monocyte chemotaxis		Enzymes/{ENZYME proteins/Hydrolases,Peptidases/Cysteine-type peptidases}	Nucleoplasm;Vesicles(Approved)			(M5892)HALLMARK CHOLESTEROL HOMEOSTASIS; (M5946)HALLMARK COAGULATION; (M5921)HALLMARK COMPLEMENT	0	0	1	0	0	0	0	0	0	0	1	0	1	0	0	0	0	0	0	1	1
100996693	LOC100996693	1	0	100996693	Gene_ID	H. sapiens	100996693	H. sapiens	SPEGNB	SPEG neighbor								0	0	0	0	0	0	0	0	0	0	0	0	0	0	0	0	0	0	0	0	1
518	ATP5G3	0	1	518	Gene_ID	H. sapiens	518	H. sapiens	ATP5MC3	ATP synthase membrane subunit c locus 3	GO:0042776 mitochondrial ATP synthesis coupled proton transport;GO:0015986 ATP synthesis coupled proton transport;GO:0042407 cristae formation						(M5936)HALLMARK OXIDATIVE PHOSPHORYLATION	0	0	0	0	0	0	0	0	0	0	0	1	0	0	0	0	0	0	0	0	1
10541	ANP32B	0	1	10541	Gene_ID	H. sapiens	10541	H. sapiens	ANP32B	acidic nuclear phosphoprotein 32 family member B	GO:0046827 positive regulation of protein export from nucleus;GO:0006919 activation of cysteine-type endopeptidase activity involved in apoptotic process;GO:0046825 regulation of protein export from nucleus			Nucleoplasm(Enhanced)Centrosome;Cytosol(Supported)				0	0	0	0	1	0	0	0	0	0	0	0	0	1	0	0	0	0	0	0	1
6446	SGK1	0	1	6446	Gene_ID	H. sapiens	6446	H. sapiens	SGK1	serum/glucocorticoid regulated kinase 1	GO:0070294 renal sodium ion absorption;GO:0003096 renal sodium ion transport;GO:0060453 regulation of gastric acid secretion	AGC Ser/Thr protein kinase family	Enzymes/{ENZYME proteins/Transferases,Kinases/AGC Ser/Thr protein kinases}	Nuclear speckles(Enhanced)	Riboflavin Monophosphate (Sodium channel regulator activity);[4-(5-naphthalen-2-yl-1H-pyrrolo[2,3-b]pyridin-3-yl)phenyl]acetic acid (Sodium channel regulator activity);4-(5-phenyl-1H-pyrrolo[2,3-b]pyridin-3-yl)benzoic acid (Sodium channel regulator activity)	(M16)PID INSULIN PATHWAY; (M136)PID FOXO PATHWAY; (M141)PID PI3KCI PATHWAY	(M5908)HALLMARK ANDROGEN RESPONSE; (M5956)HALLMARK KRAS SIGNALING DN; (M5907)HALLMARK ESTROGEN RESPONSE LATE	0	0	0	0	0	0	0	0	0	0	0	0	0	0	0	0	0	0	0	1	1
3608	ILF2	0	1	3608	Gene_ID	H. sapiens	3608	H. sapiens	ILF2	interleukin enhancer binding factor 2	GO:0043312 neutrophil degranulation;GO:0002283 neutrophil activation involved in immune response;GO:0042119 neutrophil activation			Nucleus(Enhanced)Nucleoli(Supported)			(M5926)HALLMARK MYC TARGETS V1	0	0	0	0	0	0	0	0	0	0	0	0	0	0	0	0	0	0	0	0	1
84952	CGNL1	1	0	84952	Gene_ID	H. sapiens	84952	H. sapiens	CGNL1	cingulin like 1	GO:0051497 negative regulation of stress fiber assembly;GO:0032232 negative regulation of actin filament bundle assembly;GO:0051492 regulation of stress fiber assembly			Cell Junctions(Approved)				0	0	0	0	0	1	0	0	0	0	0	0	0	0	1	0	0	0	0	0	1
2737	GLI3	1	0	2737	Gene_ID	H. sapiens	2737	H. sapiens	GLI3	GLI family zinc finger 3	GO:0022018 lateral ganglionic eminence cell proliferation;GO:0021819 layer formation in cerebral cortex;GO:0021775 smoothened signaling pathway involved in ventral spinal cord interneuron specification		Transcription factors/Zinc-coordinating DNA-binding domains			(M219)PID HEDGEHOG GLI PATHWAY		0	0	0	0	0	0	0	0	0	0	0	0	1	0	0	0	0	0	1	1	1
6741	SSB	0	1	6741	Gene_ID	H. sapiens	6741	H. sapiens	SSB	small RNA binding exonuclease protection factor La	GO:0071045 nuclear histone mRNA catabolic process;GO:0006409 tRNA export from nucleus;GO:0075522 IRES-dependent viral translational initiation			Nucleoplasm(Approved)			(M5926)HALLMARK MYC TARGETS V1	0	0	0	0	0	0	0	0	0	0	0	0	0	0	0	0	0	0	0	0	1
10432	RBM14	1	0	10432	Gene_ID	H. sapiens	10432	H. sapiens	RBM14	RNA binding motif protein 14	GO:0046600 negative regulation of centriole replication;GO:0010826 negative regulation of centrosome duplication;GO:0046599 regulation of centriole replication			Nuclear speckles(Supported)			(M5901)HALLMARK G2M CHECKPOINT	0	1	1	0	0	1	0	0	0	0	0	0	0	0	1	0	0	0	0	0	1
2181	ACSL3	0	1	2181	Gene_ID	H. sapiens	2181	H. sapiens	ACSL3	acyl-CoA synthetase long chain family member 3	GO:2001247 positive regulation of phosphatidylcholine biosynthetic process;GO:0042998 positive regulation of Golgi to plasma membrane protein transport;GO:0035338 long-chain fatty-acyl-CoA biosynthetic process		Enzymes/ENZYME proteins/Ligase	Lipid droplets;Nucleoli(Approved)	Icosapent (Protein kinase binding)		(M5908)HALLMARK ANDROGEN RESPONSE; (M5924)HALLMARK MTORC1 SIGNALING	0	0	0	0	0	0	0	0	0	0	0	0	0	0	0	0	0	0	0	0	1
514	ATP5E	0	1	514	Gene_ID	H. sapiens	514	H. sapiens	ATP5F1E	ATP synthase F1 subunit epsilon	GO:0042776 mitochondrial ATP synthesis coupled proton transport;GO:0015986 ATP synthesis coupled proton transport;GO:0042407 cristae formation						(M5936)HALLMARK OXIDATIVE PHOSPHORYLATION	0	0	0	0	0	0	0	0	0	0	0	1	0	0	0	0	0	0	0	0	1
1303	COL12A1	0	1	1303	Gene_ID	H. sapiens	1303	H. sapiens	COL12A1	collagen type XII alpha 1 chain	GO:0003429 growth plate cartilage chondrocyte morphogenesis;GO:0003414 chondrocyte morphogenesis involved in endochondral bone morphogenesis;GO:0003422 growth plate cartilage morphogenesis			Nucleus(Approved)		(M3005)NABA COLLAGENS; (M198)PID SYNDECAN 1 PATHWAY; (M160)PID AVB3 INTEGRIN PATHWAY	(M5930)HALLMARK EPITHELIAL MESENCHYMAL TRANSITION	0	0	0	0	0	1	0	0	0	0	0	0	0	0	0	0	0	0	0	1	1
6427	SRSF2	0	1	6427	Gene_ID	H. sapiens	6427	H. sapiens	SRSF2	serine and arginine rich splicing factor 2	GO:0033197 response to vitamin E;GO:0006406 mRNA export from nucleus;GO:0071427 mRNA-containing ribonucleoprotein complex export from nucleus			Nucleus(Supported)Cytosol(Approved)			(M5925)HALLMARK E2F TARGETS; (M5901)HALLMARK G2M CHECKPOINT; (M5926)HALLMARK MYC TARGETS V1	0	0	0	0	0	0	0	0	0	0	0	0	0	0	0	0	0	0	0	0	1
8660	IRS2	0	1	8660	Gene_ID	H. sapiens	8660	H. sapiens	IRS2	insulin receptor substrate 2	GO:0010748 negative regulation of plasma membrane long-chain fatty acid transport;GO:0010746 regulation of plasma membrane long-chain fatty acid transport;GO:0015911 plasma membrane long-chain fatty acid transport			Cytosol(Supported)Aggresome(Approved)		(M1718)SIG IL4RECEPTOR IN B LYPHOCYTES; (M125)PID IGF1 PATHWAY; (M233)PID EPO PATHWAY	(M5937)HALLMARK GLYCOLYSIS; (M5891)HALLMARK HYPOXIA; (M5890)HALLMARK TNFA SIGNALING VIA NFKB	0	0	0	0	0	0	0	0	0	0	0	0	1	0	0	0	0	0	0	1	1
100302133	MIR1287	1	0	100302133	Gene_ID	H. sapiens	100302133	H. sapiens	MIR1287	microRNA 1287								0	0	0	0	0	0	0	0	0	0	0	0	0	0	0	0	0	0	0	0	1
51092	SIDT2	1	0	51092	Gene_ID	H. sapiens	51092	H. sapiens	SIDT2	SID1 transmembrane family member 2	GO:0003323 type B pancreatic cell development;GO:0061178 regulation of insulin secretion involved in cellular response to glucose stimulus;GO:0003309 type B pancreatic cell differentiation		Transporters/Transporter channels and pores				(M5945)HALLMARK HEME METABOLISM	0	0	0	0	0	0	0	0	0	0	0	0	1	0	0	0	0	0	0	0	1
10964	IFI44L	0	1	10964	Gene_ID	H. sapiens	10964	H. sapiens	IFI44L	interferon induced protein 44 like	GO:0051607 defense response to virus;GO:0009615 response to virus;GO:0098542 defense response to other organism			Nucleoplasm(Approved)			(M5911)HALLMARK INTERFERON ALPHA RESPONSE; (M5956)HALLMARK KRAS SIGNALING DN; (M5913)HALLMARK INTERFERON GAMMA RESPONSE	0	0	0	0	0	0	0	0	0	0	0	0	0	0	0	0	0	0	0	0	1
27347	STK39	0	1	27347	Gene_ID	H. sapiens	27347	H. sapiens	STK39	serine/threonine kinase 39	GO:1905408 negative regulation of creatine transmembrane transporter activity;GO:1905407 regulation of creatine transmembrane transporter activity;GO:0010820 positive regulation of T cell chemotaxis	STE Ser/Thr protein kinase family	Enzymes/{ENZYME proteins/Transferases,Kinases/STE Ser/Thr protein kinases}	Cytosol;Nucleoplasm(Supported)Vesicles(Approved)		(M34)PID TCR PATHWAY	(M5908)HALLMARK ANDROGEN RESPONSE	0	0	1	0	0	0	0	0	0	0	0	0	1	0	0	0	0	0	0	1	1
4217	MAP3K5	0	1	4217	Gene_ID	H. sapiens	4217	H. sapiens	MAP3K5	mitogen-activated protein kinase kinase kinase 5	GO:0007257 activation of JUN kinase activity;GO:0010666 positive regulation of cardiac muscle cell apoptotic process;GO:1900745 positive regulation of p38MAPK cascade	STE Ser/Thr protein kinase family	Enzymes/{ENZYME proteins/Transferases,Kinases/STE Ser/Thr protein kinases}	Cytosol(Supported)		(M20)PID P38 MKK3 6PATHWAY; (M249)PID PI3KCI AKT PATHWAY; (M197)PID HIV NEF PATHWAY		0	0	0	0	0	0	0	0	0	1	0	0	0	0	0	0	0	0	0	0	1
83849	SYT15	0	1	83849	Gene_ID	H. sapiens	83849	H. sapiens	SYT15	synaptotagmin 15	GO:0014059 regulation of dopamine secretion;GO:0014046 dopamine secretion;GO:0050433 regulation of catecholamine secretion			Golgi apparatus(Approved)				0	0	0	0	0	0	0	0	0	0	0	0	0	0	0	0	0	0	0	0	1
9324	HMGN3	0	1	9324	Gene_ID	H. sapiens	9324	H. sapiens	HMGN3	high mobility group nucleosomal binding domain 3	GO:0061178 regulation of insulin secretion involved in cellular response to glucose stimulus;GO:0035773 insulin secretion involved in cellular response to glucose stimulus;GO:0050796 regulation of insulin secretion			Nucleus(Enhanced)Cytosol(Supported)				0	0	0	0	0	0	0	0	0	0	0	0	0	0	0	0	0	0	0	0	1
54331	GNG2	1	0	54331	Gene_ID	H. sapiens	54331	H. sapiens	GNG2	G protein subunit gamma 2	GO:0071380 cellular response to prostaglandin E stimulus;GO:0007191 adenylate cyclase-activating dopamine receptor signaling pathway;GO:0007223 Wnt signaling pathway, calcium modulating pathway		RAS pathway related proteins	Golgi apparatus;Vesicles(Approved)	Halothane (Signal transducer activity)	(M138)PID THROMBIN PAR4 PATHWAY; (M252)PID IL8 CXCR1 PATHWAY; (M213)PID AR NONGENOMIC PATHWAY	(M5921)HALLMARK COMPLEMENT	0	0	0	0	0	0	0	0	0	0	0	0	0	0	0	0	0	1	0	0	1
407012	MIR24-1	0	1	407012	Gene_ID	H. sapiens	407012	H. sapiens	MIR24-1	microRNA 24-1	GO:1903588 negative regulation of blood vessel endothelial cell proliferation involved in sprouting angiogenesis;GO:1902714 negative regulation of interferon-gamma secretion;GO:1905461 positive regulation of vascular associated smooth muscle cell apoptotic process							0	0	0	0	0	0	0	0	0	0	0	0	1	0	0	0	0	0	0	0	1
3776	KCNK2	0	1	3776	Gene_ID	H. sapiens	3776	H. sapiens	KCNK2	potassium two pore domain channel subfamily K member 2	GO:0060044 negative regulation of cardiac muscle cell proliferation;GO:1900039 positive regulation of cellular response to hypoxia;GO:0055022 negative regulation of cardiac muscle tissue growth		Voltage-gated ion channels/Two-P Potassium Channels		Dofetilide (Potassium ion leak channel activity);Dronedarone (Potassium ion leak channel activity)			0	0	0	0	0	0	0	0	0	1	0	0	0	0	0	0	0	0	0	0	1
79783	SUGCT	0	1	79783	Gene_ID	H. sapiens	79783	H. sapiens	SUGCT	succinyl-CoA:glutarate-CoA transferase			Enzymes/ENZYME proteins/Transferases					0	0	0	0	0	0	0	0	0	0	0	0	0	0	0	0	0	0	0	0	1
10410	IFITM3	1	0	10410	Gene_ID	H. sapiens	10410	H. sapiens	IFITM3	interferon induced transmembrane protein 3	GO:0046597 negative regulation of viral entry into host cell;GO:0046596 regulation of viral entry into host cell;GO:0032897 negative regulation of viral transcription		Transporters/Accessory Factors Involved in Transport				(M5911)HALLMARK INTERFERON ALPHA RESPONSE; (M5902)HALLMARK APOPTOSIS; (M5947)HALLMARK IL2 STAT5 SIGNALING	0	0	0	0	0	0	0	0	0	0	0	0	0	0	0	0	0	0	0	0	1
10170	DHRS9	0	1	10170	Gene_ID	H. sapiens	10170	H. sapiens	DHRS9	dehydrogenase/reductase 9	GO:0042904 9-cis-retinoic acid biosynthetic process;GO:0042905 9-cis-retinoic acid metabolic process;GO:0002138 retinoic acid biosynthetic process							0	0	0	0	0	0	0	0	0	0	0	0	0	0	0	0	0	0	0	0	1
9780	PIEZO1	1	0	9780	Gene_ID	H. sapiens	9780	H. sapiens	PIEZO1	piezo type mechanosensitive ion channel component 1	GO:0033634 positive regulation of cell-cell adhesion mediated by integrin;GO:0033625 positive regulation of integrin activation;GO:0033632 regulation of cell-cell adhesion mediated by integrin		Transporters/Transporter channels and pores					0	0	0	0	0	1	0	0	0	0	0	0	0	0	0	0	0	0	1	0	1
1794	DOCK2	0	1	1794	Gene_ID	H. sapiens	1794	H. sapiens	DOCK2	dedicator of cytokinesis 2	GO:0045060 negative thymic T cell selection;GO:0045059 positive thymic T cell selection;GO:0001766 membrane raft polarization					(M210)PID IL8 CXCR2 PATHWAY; (M241)PID RAC1 REG PATHWAY	(M5893)HALLMARK MITOTIC SPINDLE; (M5953)HALLMARK KRAS SIGNALING UP	0	0	0	0	0	1	0	0	0	0	0	0	0	0	0	0	0	1	0	1	1
4236	MFAP1	0	1	4236	Gene_ID	H. sapiens	4236	H. sapiens	MFAP1	microfibril associated protein 1	GO:0000398 mRNA splicing, via spliceosome;GO:0000377 RNA splicing, via transesterification reactions with bulged adenosine as nucleophile;GO:0000375 RNA splicing, via transesterification reactions			Cytosol;Nucleoplasm;Plasma membrane(Uncertain)		(M3008)NABA ECM GLYCOPROTEINS; (M5884)NABA CORE MATRISOME; (M5889)NABA MATRISOME		0	0	0	0	0	0	0	0	0	0	0	0	0	0	0	0	0	0	0	0	1
4060	LUM	0	1	4060	Gene_ID	H. sapiens	4060	H. sapiens	LUM	lumican	GO:0042340 keratan sulfate catabolic process;GO:0032914 positive regulation of transforming growth factor beta1 production;GO:0018146 keratan sulfate biosynthetic process					(M5882)NABA PROTEOGLYCANS; (M5884)NABA CORE MATRISOME; (M5889)NABA MATRISOME	(M5944)HALLMARK ANGIOGENESIS; (M5902)HALLMARK APOPTOSIS; (M5930)HALLMARK EPITHELIAL MESENCHYMAL TRANSITION	0	0	0	0	0	1	0	0	0	0	0	0	0	0	0	0	0	0	0	0	1
9262	STK17B	0	1	9262	Gene_ID	H. sapiens	9262	H. sapiens	STK17B	serine/threonine kinase 17b	GO:2000271 positive regulation of fibroblast apoptotic process;GO:2000269 regulation of fibroblast apoptotic process;GO:0044346 fibroblast apoptotic process	CAMK Ser/Thr protein kinase family	Enzymes/{ENZYME proteins/Transferases,Kinases/CAMK Ser/Thr protein kinases}	Cytosol;Plasma membrane(Uncertain)	Quercetin (Protein serine/threonine kinase activity)			0	0	0	0	0	0	0	0	0	0	0	0	0	0	0	0	0	0	0	0	1
23057	NMNAT2	1	0	23057	Gene_ID	H. sapiens	23057	H. sapiens	NMNAT2	nicotinamide nucleotide adenylyltransferase 2	GO:0009435 NAD biosynthetic process;GO:0019674 NAD metabolic process;GO:0019359 nicotinamide nucleotide biosynthetic process		Enzymes/ENZYME proteins/Transferases					0	0	0	0	0	0	0	0	0	0	0	0	0	0	0	0	0	0	0	0	1
130574	LYPD6	0	1	130574	Gene_ID	H. sapiens	130574	H. sapiens	LYPD6	LY6/PLAUR domain containing 6	GO:0090263 positive regulation of canonical Wnt signaling pathway;GO:2000272 negative regulation of signaling receptor activity;GO:0099601 regulation of neurotransmitter receptor activity			Cytosol(Approved)				0	0	0	0	0	0	0	0	0	0	0	0	0	0	0	0	0	0	0	0	1
4522	MTHFD1	0	1	4522	Gene_ID	H. sapiens	4522	H. sapiens	MTHFD1	methylenetetrahydrofolate dehydrogenase, cyclohydrolase and formyltetrahydrofolate synthetase 1	GO:0009257 10-formyltetrahydrofolate biosynthetic process;GO:0000105 histidine biosynthetic process;GO:0048702 embryonic neurocranium morphogenesis		Enzymes/ENZYME proteins/{Hydrolases,Ligase,Oxidoreductases}	Cytosol(Enhanced)	Tetrahydrofolic acid (Methylenetetrahydrofolate dehydrogenase [nad(p)+] activity);NADH (Methylenetetrahydrofolate dehydrogenase [nad(p)+] activity);LY374571 (Methylenetetrahydrofolate dehydrogenase [nad(p)+] activity);2'-Monophosphoadenosine 5'-Diphosphoribose (Methylenetetrahydrofolate dehydrogenase [nad(p)+] activity);LY249543 (Methylenetetrahydrofolate dehydrogenase [nad(p)+] activity)		(M5934)HALLMARK XENOBIOTIC METABOLISM	0	0	0	0	0	0	0	0	0	0	0	0	0	0	0	0	0	0	0	0	1
64129	TINAGL1	1	0	64129	Gene_ID	H. sapiens	64129	H. sapiens	TINAGL1	tubulointerstitial nephritis antigen like 1	GO:0016197 endosomal transport;GO:0046907 intracellular transport;GO:0016192 vesicle-mediated transport		Enzymes/Peptidases/Cysteine-type peptidases			(M3008)NABA ECM GLYCOPROTEINS; (M5884)NABA CORE MATRISOME; (M5889)NABA MATRISOME		0	0	0	0	0	0	0	0	0	0	0	0	0	0	0	0	0	0	0	0	1
283431	GAS2L3	1	0	283431	Gene_ID	H. sapiens	283431	H. sapiens	GAS2L3	growth arrest specific 2 like 3	GO:0000226 microtubule cytoskeleton organization;GO:0030036 actin cytoskeleton organization;GO:0030029 actin filament-based process							0	1	0	0	0	1	0	0	0	0	0	0	0	0	0	0	0	0	0	0	1
81606	LBH	0	1	81606	Gene_ID	H. sapiens	81606	H. sapiens	LBH	LBH regulator of WNT signaling pathway	GO:2000103 positive regulation of mammary stem cell proliferation;GO:1904677 positive regulation of somatic stem cell division;GO:2000101 regulation of mammary stem cell proliferation			Vesicles(Approved)				0	1	0	0	0	0	0	0	0	0	0	0	0	0	0	0	1	0	0	0	1
9866	TRIM66	1	0	9866	Gene_ID	H. sapiens	9866	H. sapiens	TRIM66	tripartite motif containing 66	GO:0045892 negative regulation of transcription, DNA-templated;GO:1903507 negative regulation of nucleic acid-templated transcription;GO:1902679 negative regulation of RNA biosynthetic process			Nucleoplasm(Supported)				0	0	0	0	0	0	0	0	0	0	0	0	0	0	0	0	0	0	0	0	1
26128	KIF1BP	0	1	26128	Gene_ID	H. sapiens	26128	H. sapiens	KIFBP	kinesin family binding protein	GO:0001701 in utero embryonic development;GO:0006839 mitochondrial transport;GO:0043009 chordate embryonic development							0	0	0	0	0	0	0	0	0	0	0	0	0	0	0	0	0	0	0	0	1
83891	SNX25	0	1	83891	Gene_ID	H. sapiens	83891	H. sapiens	SNX25	sorting nexin 25	GO:0060394 negative regulation of pathway-restricted SMAD protein phosphorylation;GO:0030512 negative regulation of transforming growth factor beta receptor signaling pathway;GO:1903845 negative regulation of cellular response to transforming growth factor beta stimulus			Vesicles(Supported)				0	0	0	0	0	0	0	0	0	0	0	0	0	0	0	0	0	0	0	0	1
5901	RAN	0	1	5901	Gene_ID	H. sapiens	5901	H. sapiens	RAN	RAN, member RAS oncogene family	GO:0035281 pre-miRNA export from nucleus;GO:0000056 ribosomal small subunit export from nucleus;GO:0000055 ribosomal large subunit export from nucleus		Transporters	Nucleus(Uncertain)	Guanosine-5'-Diphosphate (Transcription coactivator activity)	(M140)PID RANBP2 PATHWAY; (M37)PID NFKAPPAB CANONICAL PATHWAY; (M242)PID AURORA A PATHWAY	(M5925)HALLMARK E2F TARGETS; (M5926)HALLMARK MYC TARGETS V1	1	1	0	0	0	0	0	0	0	0	0	0	0	0	0	0	0	0	0	0	1
56975	FAM20C	1	0	56975	Gene_ID	H. sapiens	56975	H. sapiens	FAM20C	FAM20C golgi associated secretory pathway kinase	GO:0036179 osteoclast maturation;GO:0071895 odontoblast differentiation;GO:0036035 osteoclast development		Enzymes/ENZYME proteins/Transferases	Cytosol;Golgi apparatus;Nucleoplasm(Approved)		(M3468)NABA ECM REGULATORS; (M5885)NABA MATRISOME ASSOCIATED; (M5889)NABA MATRISOME		0	0	0	0	0	0	0	0	0	0	0	0	0	0	0	0	0	0	0	0	1
134957	STXBP5	1	0	134957	Gene_ID	H. sapiens	134957	H. sapiens	STXBP5	syntaxin binding protein 5	GO:0045921 positive regulation of exocytosis;GO:0017157 regulation of exocytosis;GO:0050708 regulation of protein secretion			Cytosol(Enhanced)				0	0	0	0	0	0	0	0	0	0	0	0	0	0	0	0	0	0	0	0	1
4175	MCM6	0	1	4175	Gene_ID	H. sapiens	4175	H. sapiens	MCM6	minichromosome maintenance complex component 6	GO:0006267 pre-replicative complex assembly involved in nuclear cell cycle DNA replication;GO:1902299 pre-replicative complex assembly involved in cell cycle DNA replication;GO:1902969 mitotic DNA replication		Enzymes/ENZYME proteins/Hydrolases	Nucleoplasm(Enhanced)			(M5925)HALLMARK E2F TARGETS; (M5901)HALLMARK G2M CHECKPOINT; (M5926)HALLMARK MYC TARGETS V1	1	0	1	1	1	0	0	0	0	0	0	0	0	1	0	0	0	0	0	0	1
329	BIRC2	0	1	329	Gene_ID	H. sapiens	329	H. sapiens	BIRC2	baculoviral IAP repeat containing 2	GO:1902443 negative regulation of ripoptosome assembly involved in necroptotic process;GO:0039535 regulation of RIG-I signaling pathway;GO:0070424 regulation of nucleotide-binding oligomerization domain containing signaling pathway		Enzymes/ENZYME proteins/Transferases	Cytosol;Nucleoli fibrillar center;Nucleus(Supported)		(M7997)SA CASPASE CASCADE; (M37)PID NFKAPPAB CANONICAL PATHWAY; (M18030)ST TUMOR NECROSIS FACTOR PATHWAY	(M5890)HALLMARK TNFA SIGNALING VIA NFKB	0	0	0	0	0	1	0	0	0	0	0	0	0	0	1	0	0	0	0	0	1
51727	CMPK1	0	1	51727	Gene_ID	H. sapiens	51727	H. sapiens	CMPK1	cytidine/uridine monophosphate kinase 1	GO:0006222 UMP biosynthetic process;GO:0046049 UMP metabolic process;GO:0009174 pyrimidine ribonucleoside monophosphate biosynthetic process		Enzymes/ENZYME proteins/Transferases	Nucleus(Supported)	Gemcitabine (Uridylate kinase activity);Cytidine-5'-Monophosphate (Uridylate kinase activity);Uridine-5'-Diphosphate (Uridylate kinase activity);P1-(Adenosine-5'-P5-(Uridine-5')Pentaphosphate (Uridylate kinase activity);Tetrafluoroaluminate Ion (Uridylate kinase activity)		(M5905)HALLMARK ADIPOGENESIS	0	0	0	0	0	0	0	0	0	0	0	0	0	0	0	0	0	0	0	0	1
55008	HERC6	1	0	55008	Gene_ID	H. sapiens	55008	H. sapiens	HERC6	HECT and RLD domain containing E3 ubiquitin protein ligase family member 6	GO:0002244 hematopoietic progenitor cell differentiation;GO:0000209 protein polyubiquitination;GO:0030097 hemopoiesis		Enzymes/ENZYME proteins/Transferases	Cytosol(Supported)Nucleus(Uncertain)			(M5911)HALLMARK INTERFERON ALPHA RESPONSE; (M5913)HALLMARK INTERFERON GAMMA RESPONSE	0	0	0	0	0	0	0	0	0	0	0	0	0	0	0	0	0	0	0	0	1
4608	MYBPH	1	0	4608	Gene_ID	H. sapiens	4608	H. sapiens	MYBPH	myosin binding protein H	GO:0006942 regulation of striated muscle contraction;GO:0006937 regulation of muscle contraction;GO:0006941 striated muscle contraction			Mitochondria;Nucleoli;Nucleus(Approved)			(M5909)HALLMARK MYOGENESIS	0	0	0	0	0	0	0	0	0	0	0	0	0	0	0	0	0	0	0	0	1
11010	GLIPR1	0	1	11010	Gene_ID	H. sapiens	11010	H. sapiens	GLIPR1	GLI pathogenesis related 1	GO:0043312 neutrophil degranulation;GO:0002283 neutrophil activation involved in immune response;GO:0042119 neutrophil activation				SOT-107		(M5930)HALLMARK EPITHELIAL MESENCHYMAL TRANSITION	0	0	0	0	0	0	0	0	0	0	0	0	0	0	0	0	0	0	0	0	1
8099	CDK2AP1	0	1	8099	Gene_ID	H. sapiens	8099	H. sapiens	CDK2AP1	cyclin dependent kinase 2 associated protein 1	GO:0006261 DNA-dependent DNA replication;GO:0006260 DNA replication;GO:0001934 positive regulation of protein phosphorylation			Nucleoplasm(Supported)		(M8873)ST FAS SIGNALING PATHWAY		0	0	0	1	0	0	0	0	0	0	0	0	0	0	0	0	0	0	0	0	1
1750	DLX6	0	1	1750	Gene_ID	H. sapiens	1750	H. sapiens	DLX6	distal-less homeobox 6	GO:0042472 inner ear morphogenesis;GO:0030326 embryonic limb morphogenesis;GO:0042471 ear morphogenesis		Transcription factors/Helix-turn-helix domains	Nuclear bodies(Approved)		(M236)PID DELTA NP63 PATHWAY		0	0	0	0	0	0	0	0	0	0	0	0	1	0	0	0	0	0	0	0	1
64787	EPS8L2	1	0	64787	Gene_ID	H. sapiens	64787	H. sapiens	EPS8L2	EPS8 like 2	GO:1900029 positive regulation of ruffle assembly;GO:1900027 regulation of ruffle assembly;GO:0097178 ruffle assembly			Cytosol;Plasma membrane(Supported)			(M5939)HALLMARK P53 PATHWAY	0	0	0	0	0	1	0	0	0	0	0	0	0	0	0	0	0	0	0	1	1
8764	TNFRSF14	1	0	8764	Gene_ID	H. sapiens	8764	H. sapiens	TNFRSF14	TNF receptor superfamily member 14	GO:1905675 negative regulation of adaptive immune memory response;GO:0002741 positive regulation of cytokine secretion involved in immune response;GO:0046642 negative regulation of alpha-beta T cell proliferation		CD markers	Cytosol;Rods & Rings(Approved)				0	0	0	0	0	0	0	0	0	0	0	0	1	0	0	0	0	0	1	0	1
51602	NOP58	0	1	51602	Gene_ID	H. sapiens	51602	H. sapiens	NOP58	NOP58 ribonucleoprotein	GO:0048254 snoRNA localization;GO:0006364 rRNA processing;GO:0006403 RNA localization			Nucleoli fibrillar center(Enhanced)Nucleus(Supported)				0	0	0	0	0	0	0	0	0	0	0	0	0	0	0	0	0	0	0	0	1
100616167	MIR4722	1	0	100616167	Gene_ID	H. sapiens	100616167	H. sapiens	MIR4722	microRNA 4722								0	0	0	0	0	0	0	0	0	0	0	0	0	0	0	0	0	0	0	0	1
2782	GNB1	0	1	2782	Gene_ID	H. sapiens	2782	H. sapiens	GNB1	G protein subunit beta 1	GO:0007213 G protein-coupled acetylcholine receptor signaling pathway;GO:0016056 rhodopsin mediated signaling pathway;GO:0071380 cellular response to prostaglandin E stimulus		RAS pathway related proteins	Golgi apparatus;Plasma membrane(Approved)		(M138)PID THROMBIN PAR4 PATHWAY; (M204)PID RHODOPSIN PATHWAY; (M252)PID IL8 CXCR1 PATHWAY		0	0	0	0	0	0	0	0	0	0	0	0	0	0	0	0	0	1	0	0	1
4735	SEPT2	0	1	4735	Gene_ID	H. sapiens	4735	H. sapiens	SEPTIN2	septin 2	GO:0061640 cytoskeleton-dependent cytokinesis;GO:0007283 spermatogenesis;GO:0007224 smoothened signaling pathway			Actin filaments(Supported)Nucleus(Approved)		(M81)PID CDC42 PATHWAY		0	1	0	0	0	0	0	0	0	0	0	1	0	0	0	0	1	0	0	0	1
5910	RAP1GDS1	0	1	5910	Gene_ID	H. sapiens	5910	H. sapiens	RAP1GDS1	Rap1 GTPase-GDP dissociation stimulator 1	GO:0032471 negative regulation of endoplasmic reticulum calcium ion concentration;GO:0051561 positive regulation of mitochondrial calcium ion concentration;GO:0014829 vascular smooth muscle contraction			Cytosol(Supported)		(M241)PID RAC1 REG PATHWAY	(M5935)HALLMARK FATTY ACID METABOLISM	0	0	0	0	0	1	0	0	0	0	0	0	0	0	0	0	0	0	0	0	1
9455	HOMER2	0	1	9455	Gene_ID	H. sapiens	9455	H. sapiens	HOMER2	homer scaffold protein 2	GO:0070885 negative regulation of calcineurin-NFAT signaling cascade;GO:2001256 regulation of store-operated calcium entry;GO:0106057 negative regulation of calcineurin-mediated signaling						(M5908)HALLMARK ANDROGEN RESPONSE; (M5907)HALLMARK ESTROGEN RESPONSE LATE	0	0	0	0	0	0	0	0	0	0	0	0	0	0	0	0	0	0	0	0	1
115572	FAM46B	0	1	115572	Gene_ID	H. sapiens	115572	H. sapiens	TENT5B	terminal nucleotidyltransferase 5B								0	0	0	0	0	0	0	0	0	0	0	0	0	0	0	0	0	0	0	0	1
79980	DSN1	1	0	79980	Gene_ID	H. sapiens	79980	H. sapiens	DSN1	DSN1 component of MIS12 kinetochore complex	GO:0043312 neutrophil degranulation;GO:0002283 neutrophil activation involved in immune response;GO:0042119 neutrophil activation			Nuclear bodies;Nucleus(Supported)Cytosol;Nucleoli fibrillar center(Approved)				1	1	0	0	0	0	0	0	0	0	0	0	0	0	0	0	0	0	0	0	1
4928	NUP98	0	1	4928	Gene_ID	H. sapiens	4928	H. sapiens	NUP98	nucleoporin 98 and 96 precursor	GO:0006409 tRNA export from nucleus;GO:0006110 regulation of glycolytic process;GO:0071431 tRNA-containing ribonucleoprotein complex export from nucleus			Nucleoplasm(Supported)Vesicles(Uncertain)			(M5901)HALLMARK G2M CHECKPOINT	1	0	0	0	0	0	0	0	0	1	0	0	0	0	0	0	0	0	0	0	1
4725	NDUFS5	0	1	4725	Gene_ID	H. sapiens	4725	H. sapiens	NDUFS5	NADH:ubiquinone oxidoreductase subunit S5	GO:0006120 mitochondrial electron transport, NADH to ubiquinone;GO:0042775 mitochondrial ATP synthesis coupled electron transport;GO:0042773 ATP synthesis coupled electron transport				NADH (Nadh dehydrogenase (ubiquinone) activity)			0	0	0	0	0	0	0	0	0	0	0	0	0	0	0	0	0	0	0	0	1
2937	GSS	0	1	2937	Gene_ID	H. sapiens	2937	H. sapiens	GSS	glutathione synthetase	GO:0006750 glutathione biosynthetic process;GO:0019184 nonribosomal peptide biosynthetic process;GO:0042398 cellular modified amino acid biosynthetic process		Enzymes/ENZYME proteins/Ligase	Nucleus(Supported)	Glutathione (Protein homodimerization activity);Glycine (Protein homodimerization activity);L-Cysteine (Protein homodimerization activity);gamma-Glutamylcysteine (Protein homodimerization activity);Phosphoaminophosphonic Acid-Adenylate Ester (Protein homodimerization activity);Acetylcysteine (Protein homodimerization activity)		(M5934)HALLMARK XENOBIOTIC METABOLISM	0	0	0	0	0	0	0	0	0	0	0	0	0	0	0	0	0	0	0	0	1
84057	MND1	0	1	84057	Gene_ID	H. sapiens	84057	H. sapiens	MND1	meiotic nuclear divisions 1	GO:0007131 reciprocal meiotic recombination;GO:0007127 meiosis I;GO:0035825 homologous recombination							1	1	0	0	1	0	0	0	0	0	0	0	0	0	0	1	0	0	0	0	1
63967	CLSPN	0	1	63967	Gene_ID	H. sapiens	63967	H. sapiens	CLSPN	claspin	GO:0033314 mitotic DNA replication checkpoint;GO:0007095 mitotic G2 DNA damage checkpoint;GO:0044818 mitotic G2/M transition checkpoint			Nucleoplasm(Enhanced)Golgi apparatus(Supported)		(M46)PID ATR PATHWAY; (M129)PID PLK1 PATHWAY		1	0	1	1	1	0	1	0	0	0	0	1	0	0	0	0	0	0	0	0	1
92370	PXYLP1	0	1	92370	Gene_ID	H. sapiens	92370	H. sapiens	PXYLP1	2-phosphoxylose phosphatase 1	GO:0010909 positive regulation of heparan sulfate proteoglycan biosynthetic process;GO:1902730 positive regulation of proteoglycan biosynthetic process;GO:0010908 regulation of heparan sulfate proteoglycan biosynthetic process							0	0	0	0	0	0	0	0	0	0	0	0	0	0	0	0	0	0	0	0	1
25874	MPC2	0	1	25874	Gene_ID	H. sapiens	25874	H. sapiens	MPC2	mitochondrial pyruvate carrier 2	GO:0061732 mitochondrial acetyl-CoA biosynthetic process from pyruvate;GO:0006850 mitochondrial pyruvate transmembrane transport;GO:0006086 acetyl-CoA biosynthetic process from pyruvate		Transporters/Electrochemical Potential-driven transporters				(M5898)HALLMARK DNA REPAIR	0	0	0	0	0	0	0	0	0	0	0	0	0	0	0	0	0	0	0	0	1
55089	SLC38A4	0	1	55089	Gene_ID	H. sapiens	55089	H. sapiens	SLC38A4	solute carrier family 38 member 4	GO:0003333 amino acid transmembrane transport;GO:1905039 carboxylic acid transmembrane transport;GO:0006865 amino acid transport		Transporters/Electrochemical Potential-driven transporters					0	0	0	0	0	0	0	0	0	0	0	0	0	0	0	0	0	0	0	0	1
57103	TIGAR	0	1	57103	Gene_ID	H. sapiens	57103	H. sapiens	TIGAR	TP53 induced glycolysis regulatory phosphatase	GO:1904024 negative regulation of glucose catabolic process to lactate via pyruvate;GO:1904023 regulation of glucose catabolic process to lactate via pyruvate;GO:1902153 regulation of response to DNA damage checkpoint signaling		Enzymes/ENZYME proteins/Hydrolases	Cytosol(Enhanced)		(M145)PID P53 DOWNSTREAM PATHWAY		0	0	0	0	1	0	0	0	0	1	0	0	0	0	1	0	0	0	0	0	1
63979	FIGNL1	0	1	63979	Gene_ID	H. sapiens	63979	H. sapiens	FIGNL1	fidgetin like 1	GO:0010569 regulation of double-strand break repair via homologous recombination;GO:0051013 microtubule severing;GO:2001243 negative regulation of intrinsic apoptotic signaling pathway							0	1	0	0	1	1	0	0	0	1	0	0	0	0	0	1	0	0	0	0	1
55366	LGR4	1	0	55366	Gene_ID	H. sapiens	55366	H. sapiens	LGR4	leucine rich repeat containing G protein-coupled receptor 4	GO:0090190 positive regulation of branching involved in ureteric bud morphogenesis;GO:0090189 regulation of branching involved in ureteric bud morphogenesis;GO:0072282 metanephric nephron tubule morphogenesis		G-protein coupled receptors/GPCRs excl olfactory receptors	Microtubule organizing center(Approved)				0	0	0	0	0	0	0	0	0	0	0	0	1	0	0	0	0	0	0	0	1
327657	SERPINA9	1	0	327657	Gene_ID	H. sapiens	327657	H. sapiens	SERPINA9	serpin family A member 9	GO:0010951 negative regulation of endopeptidase activity;GO:0010466 negative regulation of peptidase activity;GO:0045861 negative regulation of proteolysis					(M3468)NABA ECM REGULATORS; (M5885)NABA MATRISOME ASSOCIATED; (M5889)NABA MATRISOME		0	0	0	0	0	0	0	0	0	0	0	0	0	0	0	0	0	0	0	0	1
80321	CEP70	0	1	80321	Gene_ID	H. sapiens	80321	H. sapiens	CEP70	centrosomal protein 70	GO:0097711 ciliary basal body-plasma membrane docking;GO:0010389 regulation of G2/M transition of mitotic cell cycle;GO:1902749 regulation of cell cycle G2/M phase transition			Cytosol;Nucleoplasm(Uncertain)				1	0	1	0	0	1	0	0	0	0	0	1	0	0	0	0	0	0	0	0	1
25934	NIPSNAP3A	0	1	25934	Gene_ID	H. sapiens	25934	H. sapiens	NIPSNAP3A	nipsnap homolog 3A								0	0	0	0	0	0	0	0	0	0	0	0	0	0	0	0	0	0	0	0	1
7042	TGFB2	0	1	7042	Gene_ID	H. sapiens	7042	H. sapiens	TGFB2	transforming growth factor beta 2	GO:1905006 negative regulation of epithelial to mesenchymal transition involved in endocardial cushion formation;GO:0051795 positive regulation of timing of catagen;GO:1905007 positive regulation of epithelial to mesenchymal transition involved in endocardial cushion formation					(M11736)SA MMP CYTOKINE CONNECTION; (M211)PID HEDGEHOG 2PATHWAY; (M33)PID GLYPICAN 1PATHWAY	(M5902)HALLMARK APOPTOSIS; (M5956)HALLMARK KRAS SIGNALING DN; (M5950)HALLMARK ALLOGRAFT REJECTION	0	1	1	0	0	1	0	0	0	1	1	0	1	0	0	0	1	1	1	1	1
25932	CLIC4	0	1	25932	Gene_ID	H. sapiens	25932	H. sapiens	CLIC4	chloride intracellular channel 4	GO:0061299 retina vasculature morphogenesis in camera-type eye;GO:0007035 vacuolar acidification;GO:0001886 endothelial cell morphogenesis		Transporters/Transporter channels and pores	Cytosol(Supported)				0	0	0	0	0	1	0	0	0	0	0	0	1	0	0	0	0	0	0	1	1
51422	PRKAG2	0	1	51422	Gene_ID	H. sapiens	51422	H. sapiens	PRKAG2	protein kinase AMP-activated non-catalytic subunit gamma 2	GO:0006853 carnitine shuttle;GO:2000480 negative regulation of cAMP-dependent protein kinase activity;GO:0006110 regulation of glycolytic process			Nucleoplasm(Approved)				0	0	1	0	0	0	0	0	0	0	0	1	0	0	0	0	0	0	0	0	1
25813	SAMM50	0	1	25813	Gene_ID	H. sapiens	25813	H. sapiens	SAMM50	SAMM50 sorting and assembly machinery component	GO:0045040 protein import into mitochondrial outer membrane;GO:0090151 establishment of protein localization to mitochondrial membrane;GO:0042407 cristae formation		Transporters/Transporter channels and pores	Mitochondria(Enhanced)			(M5905)HALLMARK ADIPOGENESIS	0	0	0	0	0	0	0	0	0	0	0	1	0	0	0	0	0	0	0	0	1
4521	NUDT1	1	0	4521	Gene_ID	H. sapiens	4521	H. sapiens	NUDT1	nudix hydrolase 1	GO:0046061 dATP catabolic process;GO:0006203 dGTP catabolic process;GO:0046070 dGTP metabolic process		Enzymes/ENZYME proteins/Hydrolases	Cytosol(Approved)				0	0	0	0	1	0	0	0	0	0	0	0	0	0	0	0	0	0	0	0	1
121512	FGD4	0	1	121512	Gene_ID	H. sapiens	121512	H. sapiens	FGD4	FYVE, RhoGEF and PH domain containing 4	GO:0046847 filopodium assembly;GO:0008360 regulation of cell shape;GO:0051056 regulation of small GTPase mediated signal transduction			Actin filaments(Supported)			(M5893)HALLMARK MITOTIC SPINDLE	1	0	0	0	0	1	0	0	0	0	0	0	0	0	0	0	0	0	0	1	1
654	BMP6	0	1	654	Gene_ID	H. sapiens	654	H. sapiens	BMP6	bone morphogenetic protein 6	GO:2000860 positive regulation of aldosterone secretion;GO:2000857 positive regulation of mineralocorticoid secretion;GO:2000858 regulation of aldosterone secretion			Mitochondria(Approved)		(M181)PID BMP PATHWAY; (M5883)NABA SECRETED FACTORS; (M5885)NABA MATRISOME ASSOCIATED	(M5948)HALLMARK BILE ACID METABOLISM	0	0	0	0	0	0	0	0	0	0	0	0	1	0	1	0	0	0	1	1	1
340061	TMEM173	1	0	340061	Gene_ID	H. sapiens	340061	H. sapiens	STING1	stimulator of interferon response cGAMP interactor 1	GO:0002230 positive regulation of defense response to virus by host;GO:0061709 reticulophagy;GO:0071360 cellular response to exogenous dsRNA							0	0	0	0	0	0	0	0	0	0	0	0	0	0	0	0	0	0	0	0	1
39	ACAT2	1	0	39	Gene_ID	H. sapiens	39	H. sapiens	ACAT2	acetyl-CoA acetyltransferase 2	GO:0006635 fatty acid beta-oxidation;GO:0006695 cholesterol biosynthetic process;GO:0009062 fatty acid catabolic process		Enzymes/ENZYME proteins/Transferases	Cytosol(Supported)Nucleus(Approved)	S-Hydroxycysteine (Acetyl-coa c-acetyltransferase activity);Coenzyme A (Acetyl-coa c-acetyltransferase activity)		(M5892)HALLMARK CHOLESTEROL HOMEOSTASIS; (M5935)HALLMARK FATTY ACID METABOLISM	0	0	0	0	0	0	0	0	0	0	0	0	0	0	0	0	0	0	0	0	1
92521	SPECC1	0	1	92521	Gene_ID	H. sapiens	92521	H. sapiens	SPECC1	sperm antigen with calponin homology and coiled-coil domains 1	GO:0030036 actin cytoskeleton organization;GO:0030029 actin filament-based process;GO:0007010 cytoskeleton organization							0	0	0	0	0	1	0	0	0	0	0	0	0	0	0	0	0	0	0	0	1
26136	TES	0	1	26136	Gene_ID	H. sapiens	26136	H. sapiens	TES	testin LIM domain protein	GO:0008285 negative regulation of cell proliferation;GO:0042127 regulation of cell proliferation;GO:0008283 cell proliferation			Cytosol;Focal adhesion sites(Enhanced)Cell Junctions;Plasma membrane(Approved)			(M5891)HALLMARK HYPOXIA; (M5924)HALLMARK MTORC1 SIGNALING	0	0	0	0	0	0	0	0	0	0	0	0	0	0	0	0	0	0	0	0	1
27303	RBMS3	1	0	27303	Gene_ID	H. sapiens	27303	H. sapiens	RBMS3	RNA binding motif single stranded interacting protein 3	GO:0002357 defense response to tumor cell;GO:0002347 response to tumor cell;GO:0090090 negative regulation of canonical Wnt signaling pathway			Vesicles(Approved)				0	0	0	0	0	0	0	0	0	0	0	0	0	0	0	0	0	0	0	0	1
1002	CDH4	0	1	1002	Gene_ID	H. sapiens	1002	H. sapiens	CDH4	cadherin 4	GO:0045773 positive regulation of axon extension;GO:0050772 positive regulation of axonogenesis;GO:0030516 regulation of axon extension			Plasma membrane(Enhanced)			(M5915)HALLMARK APICAL JUNCTION	0	0	0	0	0	1	0	0	0	0	0	0	0	0	0	0	0	0	0	1	1
7474	WNT5A	0	1	7474	Gene_ID	H. sapiens	7474	H. sapiens	WNT5A	Wnt family member 5A	GO:0090082 positive regulation of heart induction by negative regulation of canonical Wnt signaling pathway;GO:1904955 planar cell polarity pathway involved in midbrain dopaminergic neuron differentiation;GO:0003408 optic cup formation involved in camera-type eye development					(M77)PID WNT SIGNALING PATHWAY; (M23)PID WNT NONCANONICAL PATHWAY; (M254)PID MYC REPRESS PATHWAY	(M5903)HALLMARK NOTCH SIGNALING; (M5930)HALLMARK EPITHELIAL MESENCHYMAL TRANSITION	0	1	1	0	0	1	0	0	0	1	1	0	1	0	1	1	0	0	1	1	1
9060	PAPSS2	1	0	9060	Gene_ID	H. sapiens	9060	H. sapiens	PAPSS2	3'-phosphoadenosine 5'-phosphosulfate synthase 2	GO:0050428 3'-phosphoadenosine 5'-phosphosulfate biosynthetic process;GO:0034036 purine ribonucleoside bisphosphate biosynthetic process;GO:0050427 3'-phosphoadenosine 5'-phosphosulfate metabolic process		Enzymes/ENZYME proteins/Transferases	Mitochondria(Approved)			(M5906)HALLMARK ESTROGEN RESPONSE EARLY; (M5907)HALLMARK ESTROGEN RESPONSE LATE; (M5934)HALLMARK XENOBIOTIC METABOLISM	0	0	0	0	0	0	0	0	0	0	0	0	0	0	0	0	0	0	0	0	1
10487	CAP1	0	1	10487	Gene_ID	H. sapiens	10487	H. sapiens	CAP1	cyclase associated actin cytoskeleton regulatory protein 1	GO:0043312 neutrophil degranulation;GO:0045761 regulation of adenylate cyclase activity;GO:0002283 neutrophil activation involved in immune response			Cytosol(Supported)		(M7955)SIG INSULIN RECEPTOR PATHWAY IN CARDIAC MYOCYTES	(M5915)HALLMARK APICAL JUNCTION	0	0	0	0	0	1	0	0	0	0	0	0	1	0	0	0	0	1	0	0	1
3189	HNRNPH3	0	1	3189	Gene_ID	H. sapiens	3189	H. sapiens	HNRNPH3	heterogeneous nuclear ribonucleoprotein H3	GO:0000398 mRNA splicing, via spliceosome;GO:0000377 RNA splicing, via transesterification reactions with bulged adenosine as nucleophile;GO:0000375 RNA splicing, via transesterification reactions			Nucleoplasm(Supported)				0	0	0	0	0	0	0	0	0	0	0	0	0	0	0	0	0	0	0	0	1
5358	PLS3	0	1	5358	Gene_ID	H. sapiens	5358	H. sapiens	PLS3	plastin 3	GO:0051639 actin filament network formation;GO:0051017 actin filament bundle assembly;GO:0061572 actin filament bundle organization			Cytosol(Supported)Plasma membrane(Approved)				0	0	0	0	0	1	0	0	0	0	0	0	0	0	0	0	0	0	0	0	1
1591	CYP24A1	1	0	1591	Gene_ID	H. sapiens	1591	H. sapiens	CYP24A1	cytochrome P450 family 24 subfamily A member 1	GO:0070561 vitamin D receptor signaling pathway;GO:0042369 vitamin D catabolic process;GO:0071305 cellular response to vitamin D		Enzymes/ENZYME proteins/Oxidoreductases	Mitochondria(Enhanced)Nucleoplasm(Approved)Plasma membrane(Uncertain)	CTA018 (Oxidoreductase activity)			0	0	0	0	0	0	0	0	0	0	0	0	0	0	0	0	0	0	0	0	1
113115	MTFR2	1	0	113115	Gene_ID	H. sapiens	113115	H. sapiens	MTFR2	mitochondrial fission regulator 2	GO:0000266 mitochondrial fission;GO:0009060 aerobic respiration;GO:0045333 cellular respiration			Vesicles(Uncertain)				0	1	0	0	0	0	0	0	0	0	0	0	0	0	0	0	0	0	0	0	1
283537	SLC46A3	0	1	283537	Gene_ID	H. sapiens	283537	H. sapiens	SLC46A3	solute carrier family 46 member 3	GO:0055085 transmembrane transport;GO:0006810 transport;GO:0051234 establishment of localization		Transporters/Electrochemical Potential-driven transporters	Actin filaments;Cytosol;Plasma membrane(Approved)			(M5934)HALLMARK XENOBIOTIC METABOLISM	0	0	0	0	0	0	0	0	0	0	0	0	0	0	0	0	0	0	0	0	1
2334	AFF2	1	0	2334	Gene_ID	H. sapiens	2334	H. sapiens	AFF2	AF4/FMR2 family member 2	GO:0035063 nuclear speck organization;GO:0030575 nuclear body organization;GO:0043484 regulation of RNA splicing							0	0	0	0	0	0	0	0	0	0	0	0	0	0	0	0	0	0	0	0	1
90411	MCFD2	0	1	90411	Gene_ID	H. sapiens	90411	H. sapiens	MCFD2	multiple coagulation factor deficiency 2, ER cargo receptor complex subunit	GO:0048208 COPII vesicle coating;GO:0048207 vesicle targeting, rough ER to cis-Golgi;GO:0018279 protein N-linked glycosylation via asparagine				Antihemophilic Factor (Recombinant) (Calcium ion binding)			0	0	0	0	0	0	0	0	0	0	0	0	0	0	0	0	0	0	0	0	1
140885	SIRPA	0	1	140885	Gene_ID	H. sapiens	140885	H. sapiens	SIRPA	signal regulatory protein alpha	GO:1903720 negative regulation of I-kappaB phosphorylation;GO:0071641 negative regulation of macrophage inflammatory protein 1 alpha production;GO:0071650 negative regulation of chemokine (C-C motif) ligand 5 production		CD markers				(M5915)HALLMARK APICAL JUNCTION	0	0	0	0	0	0	0	0	0	1	0	0	0	0	1	0	0	1	1	0	1
9537	TP53I11	1	0	9537	Gene_ID	H. sapiens	9537	H. sapiens	TP53I11	tumor protein p53 inducible protein 11	GO:0008285 negative regulation of cell proliferation;GO:0042127 regulation of cell proliferation;GO:0008283 cell proliferation			Endoplasmic reticulum;Golgi apparatus(Supported)				0	0	0	0	0	0	0	0	0	0	0	0	0	0	0	0	0	0	0	0	1
9768	KIAA0101	1	0	9768	Gene_ID	H. sapiens	9768	H. sapiens	PCLAF	PCNA clamp associated factor	GO:0019985 translesion synthesis;GO:0000731 DNA synthesis involved in DNA repair;GO:0006301 postreplication repair			Centrosome(Supported)				0	1	0	1	1	0	0	0	0	0	0	0	0	0	0	0	0	0	0	0	1
6443	SGCB	0	1	6443	Gene_ID	H. sapiens	6443	H. sapiens	SGCB	sarcoglycan beta	GO:0097084 vascular smooth muscle cell development;GO:0035886 vascular smooth muscle cell differentiation;GO:0055013 cardiac muscle cell development			Cytosol(Approved)			(M5930)HALLMARK EPITHELIAL MESENCHYMAL TRANSITION	0	0	0	0	0	0	0	0	0	0	0	0	0	0	0	0	0	0	0	0	1
57697	FANCM	1	0	57697	Gene_ID	H. sapiens	57697	H. sapiens	FANCM	FA complementation group M	GO:1902527 positive regulation of protein monoubiquitination;GO:0071932 replication fork reversal;GO:1902525 regulation of protein monoubiquitination		Enzymes/ENZYME proteins/Hydrolases	Nucleoplasm(Supported)		(M1)PID FANCONI PATHWAY		0	1	0	1	1	0	0	1	0	0	0	0	0	0	0	1	0	0	0	0	1
7534	YWHAZ	0	1	7534	Gene_ID	H. sapiens	7534	H. sapiens	YWHAZ	tyrosine 3-monooxygenase/tryptophan 5-monooxygenase activation protein zeta	GO:1900740 positive regulation of protein insertion into mitochondrial membrane involved in apoptotic signaling pathway;GO:1900739 regulation of protein insertion into mitochondrial membrane involved in apoptotic signaling pathway;GO:1901030 positive regulation of mitochondrial outer membrane permeabilization involved in apoptotic signaling pathway					(M199)PID P38 MK2 PATHWAY; (M247)PID INSULIN GLUCOSE PATHWAY; (M182)PID IL3 PATHWAY	(M5922)HALLMARK UNFOLDED PROTEIN RESPONSE	1	0	1	1	0	1	0	0	0	0	0	0	1	0	0	0	0	1	0	0	1
23268	DNMBP	1	0	23268	Gene_ID	H. sapiens	23268	H. sapiens	DNMBP	dynamin binding protein	GO:0008360 regulation of cell shape;GO:0022604 regulation of cell morphogenesis;GO:0007568 aging			Cytosol;Golgi apparatus;Nuclear bodies;Nucleoli(Approved)		(M83)PID CDC42 REG PATHWAY	(M5953)HALLMARK KRAS SIGNALING UP	0	0	0	0	0	0	0	0	0	0	0	0	0	0	0	0	0	0	0	1	1
400221	FLJ22447	0	1	400221	Gene_ID	H. sapiens	400221	H. sapiens	FLJ22447	uncharacterized LOC400221								0	0	0	0	0	0	0	0	0	0	0	0	0	0	0	0	0	0	0	0	1
10954	PDIA5	0	1	10954	Gene_ID	H. sapiens	10954	H. sapiens	PDIA5	protein disulfide isomerase family A member 5	GO:0036498 IRE1-mediated unfolded protein response;GO:0030968 endoplasmic reticulum unfolded protein response;GO:0034620 cellular response to unfolded protein		Enzymes/ENZYME proteins/Isomerase	Golgi apparatus;Nucleoli fibrillar center;Nucleoplasm(Supported)			(M5922)HALLMARK UNFOLDED PROTEIN RESPONSE	0	0	0	0	0	0	0	0	0	0	0	0	0	0	0	0	0	0	0	0	1
10157	AASS	1	0	10157	Gene_ID	H. sapiens	10157	H. sapiens	AASS	aminoadipate-semialdehyde synthase	GO:0033512 L-lysine catabolic process to acetyl-CoA via saccharopine;GO:0019474 L-lysine catabolic process to acetyl-CoA;GO:0019477 L-lysine catabolic process		Enzymes/ENZYME proteins/Oxidoreductases	Mitochondria;Vesicles(Enhanced)	L-Glutamic Acid (Saccharopine dehydrogenase (nadp+, l-lysine-forming) activity);NADH (Saccharopine dehydrogenase (nadp+, l-lysine-forming) activity);Nadph Dihydro-Nicotinamide-Adenine-Dinucleotidephosphate (Saccharopine dehydrogenase (nadp+, l-lysine-forming) activity);N-(5-Amino-5-Carboxypentyl)Glutamic Acid (Saccharopine dehydrogenase (nadp+, l-lysine-forming) activity)			0	0	0	0	0	0	0	0	0	0	0	0	0	0	0	0	0	0	0	0	1
1958	EGR1	0	1	1958	Gene_ID	H. sapiens	1958	H. sapiens	EGR1	early growth response 1	GO:0072303 positive regulation of glomerular metanephric mesangial cell proliferation;GO:0072301 regulation of metanephric glomerular mesangial cell proliferation;GO:0072126 positive regulation of glomerular mesangial cell proliferation		Transcription factors/Zinc-coordinating DNA-binding domains	Nucleoplasm(Enhanced)		(M11)PID PRL SIGNALING EVENTS PATHWAY; (M270)PID MAPK TRK PATHWAY; (M271)PID PI3K PLC TRK PATHWAY	(M5890)HALLMARK TNFA SIGNALING VIA NFKB	0	0	0	0	0	0	0	0	0	0	0	0	1	0	0	0	0	0	0	0	1
5036	PA2G4	0	1	5036	Gene_ID	H. sapiens	5036	H. sapiens	PA2G4	proliferation-associated 2G4	GO:0043312 neutrophil degranulation;GO:0002283 neutrophil activation involved in immune response;GO:0042119 neutrophil activation		Enzymes/Peptidases/Metallopeptidases	Cytosol(Approved)		(M58)PID AR PATHWAY	(M5928)HALLMARK MYC TARGETS V2; (M5908)HALLMARK ANDROGEN RESPONSE; (M5925)HALLMARK E2F TARGETS	0	0	0	0	0	0	0	0	0	0	0	0	0	0	0	0	0	0	0	0	1
4921	DDR2	1	0	4921	Gene_ID	H. sapiens	4921	H. sapiens	DDR2	discoidin domain receptor tyrosine kinase 2	GO:0090091 positive regulation of extracellular matrix disassembly;GO:0010763 positive regulation of fibroblast migration;GO:0010715 regulation of extracellular matrix disassembly	Tyr protein kinase family	CD markers;Enzymes/{ENZYME proteins/Transferases,Kinases/Tyr protein kinases}	Plasma membrane(Supported)Actin filaments(Approved)	Regorafenib (Transmembrane receptor protein tyrosine kinase activity)			0	0	0	0	0	1	0	0	0	0	0	0	1	0	0	0	0	0	0	0	1
79172	CENPO	0	1	79172	Gene_ID	H. sapiens	79172	H. sapiens	CENPO	centromere protein O	GO:0034080 CENP-A containing nucleosome assembly;GO:0006336 DNA replication-independent nucleosome assembly;GO:0031055 chromatin remodeling at centromere							1	0	0	0	1	0	0	0	0	0	0	0	0	1	0	0	0	0	0	0	1
22995	CEP152	1	0	22995	Gene_ID	H. sapiens	22995	H. sapiens	CEP152	centrosomal protein 152	GO:0098535 de novo centriole assembly involved in multi-ciliated epithelial cell differentiation;GO:0097742 de novo centriole assembly;GO:1903251 multi-ciliated epithelial cell differentiation			Centrosome(Supported)				1	1	1	0	0	0	0	0	0	0	0	1	0	0	0	0	0	0	0	0	1
64866	CDCP1	0	1	64866	Gene_ID	H. sapiens	64866	H. sapiens	CDCP1	CUB domain containing protein 1			CD markers				(M5947)HALLMARK IL2 STAT5 SIGNALING	0	0	0	0	0	0	0	0	0	0	0	0	0	0	0	0	0	0	0	0	1
253827	MSRB3	0	1	253827	Gene_ID	H. sapiens	253827	H. sapiens	MSRB3	methionine sulfoxide reductase B3	GO:0030091 protein repair;GO:0006979 response to oxidative stress;GO:0055114 oxidation-reduction process							0	0	0	0	0	0	0	0	0	0	0	0	0	0	0	0	0	0	0	0	1
9643	MORF4L2	0	1	9643	Gene_ID	H. sapiens	9643	H. sapiens	MORF4L2	mortality factor 4 like 2	GO:0043968 histone H2A acetylation;GO:0043967 histone H4 acetylation;GO:0051155 positive regulation of striated muscle cell differentiation			Nucleus(Enhanced)				0	0	0	0	1	0	0	0	0	0	0	0	0	0	0	0	0	0	0	0	1
2074	ERCC6	0	1	2074	Gene_ID	H. sapiens	2074	H. sapiens	ERCC6	ERCC excision repair 6, chromatin remodeling factor	GO:0007256 activation of JNKK activity;GO:2001033 negative regulation of double-strand break repair via nonhomologous end joining;GO:0007257 activation of JUN kinase activity			Nuclear bodies;Nucleoplasm(Approved)				0	0	1	0	1	1	0	0	0	1	0	0	0	1	0	0	0	0	0	0	1
583	BBS2	1	0	583	Gene_ID	H. sapiens	583	H. sapiens	BBS2	Bardet-Biedl syndrome 2	GO:0038108 negative regulation of appetite by leptin-mediated signaling pathway;GO:0014824 artery smooth muscle contraction;GO:0060296 regulation of cilium beat frequency involved in ciliary motility							0	1	0	0	0	0	0	0	0	0	0	1	0	0	0	0	0	0	0	0	1
94241	TP53INP1	1	0	94241	Gene_ID	H. sapiens	94241	H. sapiens	TP53INP1	tumor protein p53 inducible nuclear protein 1	GO:1904761 negative regulation of myofibroblast differentiation;GO:0072703 cellular response to methyl methanesulfonate;GO:1904760 regulation of myofibroblast differentiation			Cytosol(Supported)		(M145)PID P53 DOWNSTREAM PATHWAY	(M5892)HALLMARK CHOLESTEROL HOMEOSTASIS	0	0	1	0	0	0	0	0	0	0	0	0	0	0	0	0	0	0	0	0	1
375035	SFT2D2	0	1	375035	Gene_ID	H. sapiens	375035	H. sapiens	SFT2D2	SFT2 domain containing 2	GO:0015031 protein transport;GO:0015833 peptide transport;GO:0016192 vesicle-mediated transport							0	0	0	0	0	0	0	0	0	0	0	0	0	0	0	0	0	0	0	0	1
4071	TM4SF1	0	1	4071	Gene_ID	H. sapiens	4071	H. sapiens	TM4SF1	transmembrane 4 L six family member 1	GO:0001825 blastocyst formation;GO:0001824 blastocyst development;GO:0001701 in utero embryonic development						(M5939)HALLMARK P53 PATHWAY	0	0	0	0	0	0	0	0	0	0	0	0	0	0	0	0	0	0	0	0	1
2058	QARS	0	1	2058	Gene_ID	H. sapiens	2058	H. sapiens	EPRS1	glutamyl-prolyl-tRNA synthetase 1	GO:0140212 regulation of long-chain fatty acid import into cell;GO:0006433 prolyl-tRNA aminoacylation;GO:0006424 glutamyl-tRNA aminoacylation		Enzymes/ENZYME proteins/Ligase	Cytosol(Enhanced)	L-Glutamic Acid (Rna stem-loop binding);L-Proline (Rna stem-loop binding);'5'-O-(N-(L-Prolyl)-Sulfamoyl)Adenosine (Rna stem-loop binding);5'-O-(N-(L-Cysteinyl)-Sulfamoyl)Adenosine (Rna stem-loop binding);'5'-O-(N-(L-Alanyl)-Sulfamoyl)Adenosine (Rna stem-loop binding)		(M5924)HALLMARK MTORC1 SIGNALING; (M5926)HALLMARK MYC TARGETS V1	0	0	0	0	0	0	0	0	0	0	0	0	0	0	0	0	0	0	0	0	1
1308	COL17A1	0	1	1308	Gene_ID	H. sapiens	1308	H. sapiens	COL17A1	collagen type XVII alpha 1 chain	GO:0031581 hemidesmosome assembly;GO:0007044 cell-substrate junction assembly;GO:0007160 cell-matrix adhesion			Plasma membrane(Supported)Golgi apparatus(Approved)		(M3005)NABA COLLAGENS; (M198)PID SYNDECAN 1 PATHWAY; (M239)PID A6B1 A6B4 INTEGRIN PATHWAY	(M5915)HALLMARK APICAL JUNCTION	0	0	0	0	0	0	0	0	0	0	0	0	0	0	0	0	0	0	0	0	1
1316	KLF6	0	1	1316	Gene_ID	H. sapiens	1316	H. sapiens	KLF6	Kruppel like factor 6	GO:0030183 B cell differentiation;GO:0030098 lymphocyte differentiation;GO:0042113 B cell activation		Transcription factors/Zinc-coordinating DNA-binding domains	Cytosol;Nucleoli fibrillar center;Nucleus;Vesicles(Approved)		(M4910)ST ERK1 ERK2 MAPK PATHWAY	(M5947)HALLMARK IL2 STAT5 SIGNALING; (M5932)HALLMARK INFLAMMATORY RESPONSE; (M5891)HALLMARK HYPOXIA	0	0	0	0	0	0	0	0	0	0	0	0	0	0	0	0	0	0	0	0	1
50650	ARHGEF3	0	1	50650	Gene_ID	H. sapiens	50650	H. sapiens	ARHGEF3	Rho guanine nucleotide exchange factor 3	GO:0035025 positive regulation of Rho protein signal transduction;GO:0046579 positive regulation of Ras protein signal transduction;GO:0035023 regulation of Rho protein signal transduction			Cytosol(Approved)		(M68)PID RHOA REG PATHWAY	(M5893)HALLMARK MITOTIC SPINDLE	1	0	0	0	0	0	0	0	0	0	0	0	0	0	0	0	0	0	0	0	1
4771	NF2	0	1	4771	Gene_ID	H. sapiens	4771	H. sapiens	NF2	neurofibromin 2	GO:0051496 positive regulation of stress fiber assembly;GO:0042532 negative regulation of tyrosine phosphorylation of STAT protein;GO:0014010 Schwann cell proliferation			Cytosol;Nucleus;Plasma membrane(Enhanced)		(M175)PID ERBB2 ERBB3 PATHWAY	(M5951)HALLMARK SPERMATOGENESIS; (M5915)HALLMARK APICAL JUNCTION	1	0	0	0	0	1	0	0	0	0	0	0	0	0	0	0	0	0	1	0	1
3178	HNRNPA1	0	1	3178	Gene_ID	H. sapiens	3178	H. sapiens	HNRNPA1	heterogeneous nuclear ribonucleoprotein A1	GO:1903936 cellular response to sodium arsenite;GO:0032211 negative regulation of telomere maintenance via telomerase;GO:0032212 positive regulation of telomere maintenance via telomerase			Nucleoplasm(Enhanced)		(M58)PID AR PATHWAY	(M5926)HALLMARK MYC TARGETS V1	0	0	0	0	0	1	0	1	0	1	0	0	0	0	1	0	0	0	0	0	1
29781	NCAPH2	0	1	29781	Gene_ID	H. sapiens	29781	H. sapiens	NCAPH2	non-SMC condensin II complex subunit H2	GO:0051309 female meiosis chromosome separation;GO:0016321 female meiosis chromosome segregation;GO:0010032 meiotic chromosome condensation			Nucleoplasm(Enhanced)Cytokinetic bridge(Supported)			(M5935)HALLMARK FATTY ACID METABOLISM	1	1	0	0	1	0	0	1	1	0	0	0	0	1	0	1	0	0	0	0	1
100500837	MIR3606	1	0	100500837	Gene_ID	H. sapiens	100500837	H. sapiens	MIR3606	microRNA 3606								0	0	0	0	0	0	0	0	0	0	0	0	0	0	0	0	0	0	0	0	1
92745	SLC38A5	0	1	92745	Gene_ID	H. sapiens	92745	H. sapiens	SLC38A5	solute carrier family 38 member 5	GO:1904557 L-alanine transmembrane transport;GO:1903713 asparagine transmembrane transport;GO:0015825 L-serine transport		Transporters/Electrochemical Potential-driven transporters	Cytosol;Plasma membrane;Vesicles(Approved)				0	0	0	0	0	0	0	0	0	0	0	0	0	0	0	0	0	0	0	0	1
55970	GNG12	0	1	55970	Gene_ID	H. sapiens	55970	H. sapiens	GNG12	G protein subunit gamma 12	GO:0021987 cerebral cortex development;GO:0021543 pallium development;GO:0021537 telencephalon development		RAS pathway related proteins	Mitochondria(Approved)			(M5946)HALLMARK COAGULATION	0	0	0	0	0	0	0	0	0	0	0	0	0	0	0	0	0	1	0	0	1
3613	IMPA2	0	1	3613	Gene_ID	H. sapiens	3613	H. sapiens	IMPA2	inositol monophosphatase 2	GO:0006021 inositol biosynthetic process;GO:0046855 inositol phosphate dephosphorylation;GO:0071545 inositol phosphate catabolic process		Enzymes/ENZYME proteins/Hydrolases	Mitochondria;Nucleoplasm(Approved)	Lithium (Protein homodimerization activity)		(M5907)HALLMARK ESTROGEN RESPONSE LATE	0	0	0	0	0	0	0	0	0	0	0	0	0	0	0	0	0	0	0	0	1
1282	COL4A1	0	1	1282	Gene_ID	H. sapiens	1282	H. sapiens	COL4A1	collagen type IV alpha 1 chain	GO:0061304 retinal blood vessel morphogenesis;GO:0061299 retina vasculature morphogenesis in camera-type eye;GO:0061298 retina vasculature development in camera-type eye			Cytosol;Nucleoplasm(Uncertain)		(M5887)NABA BASEMENT MEMBRANES; (M53)PID INTEGRIN3 PATHWAY; (M3005)NABA COLLAGENS	(M5905)HALLMARK ADIPOGENESIS; (M5930)HALLMARK EPITHELIAL MESENCHYMAL TRANSITION	0	0	0	0	0	0	0	0	0	0	0	0	1	0	0	0	0	0	0	0	1
7398	USP1	0	1	7398	Gene_ID	H. sapiens	7398	H. sapiens	USP1	ubiquitin specific peptidase 1	GO:0035520 monoubiquitinated protein deubiquitination;GO:0042769 DNA damage response, detection of DNA damage;GO:0036297 interstrand cross-link repair		Enzymes/{ENZYME proteins/Hydrolases,Peptidases/Cysteine-type peptidases}	Nucleoplasm(Supported)		(M1)PID FANCONI PATHWAY	(M5925)HALLMARK E2F TARGETS; (M5926)HALLMARK MYC TARGETS V1	0	0	0	0	1	0	0	0	0	1	0	0	0	0	0	0	0	0	0	0	1
6513	SLC2A1	0	1	6513	Gene_ID	H. sapiens	6513	H. sapiens	SLC2A1	solute carrier family 2 member 1	GO:0005989 lactose biosynthetic process;GO:0005988 lactose metabolic process;GO:0070837 dehydroascorbic acid transport		Transporters/Electrochemical Potential-driven transporters	Plasma membrane(Enhanced)		(M44)PID HIF2PATHWAY; (M255)PID HIF1 TFPATHWAY; (M66)PID MYC ACTIV PATHWAY	(M5923)HALLMARK PI3K AKT MTOR SIGNALING; (M5891)HALLMARK HYPOXIA; (M5945)HALLMARK HEME METABOLISM	0	0	0	0	0	0	0	0	0	0	0	0	0	0	0	0	0	0	0	0	1
84918	LRP11	0	1	84918	Gene_ID	H. sapiens	84918	H. sapiens	LRP11	LDL receptor related protein 11	GO:0035902 response to immobilization stress;GO:0009414 response to water deprivation;GO:0033555 multicellular organismal response to stress			Mitochondria(Approved)				0	0	0	0	0	0	0	0	0	0	0	0	0	0	0	0	0	0	0	0	1
9688	NUP93	0	1	9688	Gene_ID	H. sapiens	9688	H. sapiens	NUP93	nucleoporin 93	GO:0006409 tRNA export from nucleus;GO:0016973 poly(A)+ mRNA export from nucleus;GO:0006110 regulation of glycolytic process		Transporters/Transporter channels and pores				(M5913)HALLMARK INTERFERON GAMMA RESPONSE	1	0	0	0	0	0	0	0	0	1	0	0	0	1	0	0	0	0	0	0	1
11123	RCAN3	0	1	11123	Gene_ID	H. sapiens	11123	H. sapiens	RCAN3	RCAN family member 3	GO:0070884 regulation of calcineurin-NFAT signaling cascade;GO:0106056 regulation of calcineurin-mediated signaling;GO:0033173 calcineurin-NFAT signaling cascade			Nuclear speckles;Nucleoli fibrillar center(Approved)				0	0	0	0	0	0	0	0	0	0	0	0	0	0	0	0	0	0	0	0	1
64065	PERP	1	0	64065	Gene_ID	H. sapiens	64065	H. sapiens	PERP	p53 apoptosis effector related to PMP22	GO:0097202 activation of cysteine-type endopeptidase activity;GO:0070268 cornification;GO:0097186 amelogenesis					(M236)PID DELTA NP63 PATHWAY; (M256)PID TAP63 PATHWAY; (M145)PID P53 DOWNSTREAM PATHWAY	(M5939)HALLMARK P53 PATHWAY; (M5907)HALLMARK ESTROGEN RESPONSE LATE	0	0	0	0	0	0	0	0	0	0	0	0	0	0	0	0	0	0	0	0	1
5058	PAK1	0	1	5058	Gene_ID	H. sapiens	5058	H. sapiens	PAK1	p21 (RAC1) activated kinase 1	GO:0061052 negative regulation of cell growth involved in cardiac muscle cell development;GO:0033148 positive regulation of intracellular estrogen receptor signaling pathway;GO:0046628 positive regulation of insulin receptor signaling pathway	STE Ser/Thr protein kinase family	Enzymes/{ENZYME proteins/Transferases,Kinases/STE Ser/Thr protein kinases};RAS pathway related proteins	Cytosol;Plasma membrane(Supported)		(M273)PID EPHA2 FWD PATHWAY; (M268)PID S1P S1P2 PATHWAY; (M242)PID AURORA A PATHWAY	(M5902)HALLMARK APOPTOSIS	1	0	1	0	0	1	1	0	0	1	0	0	1	1	0	0	0	0	1	1	1
10190	TXNDC9	0	1	10190	Gene_ID	H. sapiens	10190	H. sapiens	TXNDC9	thioredoxin domain containing 9	GO:0045454 cell redox homeostasis;GO:0019725 cellular homeostasis;GO:0042592 homeostatic process			Cytosol(Enhanced)				0	0	0	0	0	0	0	0	0	0	0	0	0	0	0	0	0	0	0	0	1
3212	HOXB2	0	1	3212	Gene_ID	H. sapiens	3212	H. sapiens	HOXB2	homeobox B2	GO:0021612 facial nerve structural organization;GO:0021569 rhombomere 3 development;GO:0021610 facial nerve morphogenesis		Transcription factors/Helix-turn-helix domains	Nucleus(Supported)				0	0	0	0	0	0	0	0	0	0	0	0	0	0	0	0	0	0	0	0	1
5982	RFC2	0	1	5982	Gene_ID	H. sapiens	5982	H. sapiens	RFC2	replication factor C subunit 2	GO:1900264 positive regulation of DNA-directed DNA polymerase activity;GO:0032201 telomere maintenance via semi-conservative replication;GO:0070987 error-free translesion synthesis			Nucleoplasm(Supported)Golgi apparatus(Approved)		(M46)PID ATR PATHWAY; (M1)PID FANCONI PATHWAY	(M5898)HALLMARK DNA REPAIR; (M5925)HALLMARK E2F TARGETS	1	0	0	1	1	0	0	0	0	1	0	0	0	1	0	0	0	0	0	0	1
60559	SPCS3	0	1	60559	Gene_ID	H. sapiens	60559	H. sapiens	SPCS3	signal peptidase complex subunit 3	GO:0019082 viral protein processing;GO:0006465 signal peptide processing;GO:0045047 protein targeting to ER						(M5908)HALLMARK ANDROGEN RESPONSE; (M5922)HALLMARK UNFOLDED PROTEIN RESPONSE	0	0	0	0	0	0	0	0	0	0	0	0	0	0	0	0	0	0	0	0	1
55125	CEP192	1	0	55125	Gene_ID	H. sapiens	55125	H. sapiens	CEP192	centrosomal protein 192	GO:0090222 centrosome-templated microtubule nucleation;GO:0051418 microtubule nucleation by microtubule organizing center;GO:0071539 protein localization to centrosome			Centrosome;Cytosol(Approved)			(M5893)HALLMARK MITOTIC SPINDLE	1	1	1	0	0	1	0	0	0	0	0	1	0	0	0	0	0	0	0	0	1
1295	COL8A1	0	1	1295	Gene_ID	H. sapiens	1295	H. sapiens	COL8A1	collagen type VIII alpha 1 chain	GO:0035987 endodermal cell differentiation;GO:0001706 endoderm formation;GO:0048593 camera-type eye morphogenesis			Vesicles(Supported)		(M3005)NABA COLLAGENS; (M198)PID SYNDECAN 1 PATHWAY; (M160)PID AVB3 INTEGRIN PATHWAY		0	0	0	0	0	0	0	0	0	0	0	0	1	0	0	0	0	0	1	0	1
54948	MRPL16	0	1	54948	Gene_ID	H. sapiens	54948	H. sapiens	MRPL16	mitochondrial ribosomal protein L16	GO:0070126 mitochondrial translational termination;GO:0070125 mitochondrial translational elongation;GO:0006415 translational termination		Ribosomal proteins					0	0	0	0	0	0	0	0	0	0	0	0	0	0	0	0	0	0	0	0	1
113130	CDCA5	1	0	113130	Gene_ID	H. sapiens	113130	H. sapiens	CDCA5	cell division cycle associated 5	GO:0071922 regulation of cohesin loading;GO:0031536 positive regulation of exit from mitosis;GO:0071921 cohesin loading			Nucleoplasm(Supported)				1	1	1	1	1	1	0	1	1	0	1	0	0	1	0	0	0	0	0	0	1
54677	CROT	0	1	54677	Gene_ID	H. sapiens	54677	H. sapiens	CROT	carnitine O-octanoyltransferase	GO:0033540 fatty acid beta-oxidation using acyl-CoA oxidase;GO:0051791 medium-chain fatty acid metabolic process;GO:0015936 coenzyme A metabolic process		Enzymes/ENZYME proteins/Transferases;Transporters	Vesicles(Supported)	L-Carnitine (Receptor binding);(3-Carboxy-2-(R)-Hydroxy-Propyl)-Trimethyl-Ammonium (Receptor binding);3-Carboxy-N,N,N-Trimethyl-2-(Octanoyloxy)Propan-1-Aminium (Receptor binding)		(M5948)HALLMARK BILE ACID METABOLISM; (M5953)HALLMARK KRAS SIGNALING UP; (M5934)HALLMARK XENOBIOTIC METABOLISM	0	0	0	0	0	0	0	0	0	0	0	0	0	0	0	0	0	0	0	0	1
5954	RCN1	0	1	5954	Gene_ID	H. sapiens	5954	H. sapiens	RCN1	reticulocalbin 1	GO:0043687 post-translational protein modification;GO:0006464 cellular protein modification process;GO:0036211 protein modification process			Endoplasmic reticulum(Enhanced)				0	0	0	0	0	0	0	0	0	0	0	0	0	0	0	0	0	0	0	0	1
84319	CMSS1	0	1	84319	Gene_ID	H. sapiens	84319	H. sapiens	CMSS1	cms1 ribosomal small subunit homolog				Mitochondria;Nuclear membrane;Nucleoli;Nucleus(Approved)				0	0	0	0	0	0	0	0	0	0	0	0	0	0	0	0	0	0	0	0	1
101928969	RHOXF1-AS1	0	1	101928969	Gene_ID	H. sapiens	101928969	H. sapiens	RHOXF1-AS1	RHOXF1 antisense RNA 1								0	0	0	0	0	0	0	0	0	0	0	0	0	0	0	0	0	0	0	0	1
6884	TAF13	0	1	6884	Gene_ID	H. sapiens	6884	H. sapiens	TAF13	TATA-box binding protein associated factor 13	GO:0042795 snRNA transcription by RNA polymerase II;GO:0009301 snRNA transcription;GO:0098781 ncRNA transcription			Nucleoli;Nucleus(Enhanced)			(M5898)HALLMARK DNA REPAIR	0	0	0	0	0	0	0	0	0	0	0	0	0	0	0	0	0	0	0	0	1
8793	TNFRSF10D	0	1	8793	Gene_ID	H. sapiens	8793	H. sapiens	TNFRSF10D	TNF receptor superfamily member 10d	GO:0050900 leukocyte migration;GO:0043066 negative regulation of apoptotic process;GO:0043069 negative regulation of programmed cell death		CD markers	Actin filaments;Plasma membrane(Approved)		(M79)PID TRAIL PATHWAY; (M145)PID P53 DOWNSTREAM PATHWAY		0	0	0	0	0	0	0	0	0	0	0	0	0	0	0	0	0	1	0	0	1
57194	ATP10A	0	1	57194	Gene_ID	H. sapiens	57194	H. sapiens	ATP10A	ATPase phospholipid transporting 10A (putative)	GO:0045332 phospholipid translocation;GO:0034204 lipid translocation;GO:0015914 phospholipid transport		Enzymes/ENZYME proteins/Hydrolases					0	0	0	0	0	0	0	0	0	0	0	0	0	0	0	0	0	0	0	1	1
23658	LSM5	0	1	23658	Gene_ID	H. sapiens	23658	H. sapiens	LSM5	LSM5 homolog, U6 small nuclear RNA and mRNA degradation associated	GO:0043928 exonucleolytic nuclear-transcribed mRNA catabolic process involved in deadenylation-dependent decay;GO:0000291 nuclear-transcribed mRNA catabolic process, exonucleolytic;GO:0000288 nuclear-transcribed mRNA catabolic process, deadenylation-dependent decay							0	0	0	0	0	0	0	0	0	0	0	0	0	0	0	0	0	0	0	0	1
59339	PLEKHA2	0	1	59339	Gene_ID	H. sapiens	59339	H. sapiens	PLEKHA2	pleckstrin homology domain containing A2	GO:0001954 positive regulation of cell-matrix adhesion;GO:0006661 phosphatidylinositol biosynthetic process;GO:0001952 regulation of cell-matrix adhesion			Cytosol;Nuclear bodies;Nucleus(Uncertain)		(M141)PID PI3KCI PATHWAY		0	0	0	0	0	0	0	0	0	0	0	0	0	0	0	0	0	0	1	0	1
220134	SKA1	1	0	220134	Gene_ID	H. sapiens	220134	H. sapiens	SKA1	spindle and kinetochore associated complex subunit 1	GO:0031110 regulation of microtubule polymerization or depolymerization;GO:0031109 microtubule polymerization or depolymerization;GO:0070507 regulation of microtubule cytoskeleton organization			Microtubules(Supported)				1	1	0	0	0	1	0	0	0	0	0	0	0	0	0	0	0	0	0	0	1
143903	LAYN	0	1	143903	Gene_ID	H. sapiens	143903	H. sapiens	LAYN	layilin				Cytosol(Approved)	Hyaluronic acid (Hyaluronic acid binding)		(M5915)HALLMARK APICAL JUNCTION	0	0	0	0	0	0	0	0	0	0	0	0	0	0	0	0	0	0	0	0	1
117178	SSX2IP	1	0	117178	Gene_ID	H. sapiens	117178	H. sapiens	SSX2IP	SSX family member 2 interacting protein	GO:0035735 intraciliary transport involved in cilium assembly;GO:0035020 regulation of Rac protein signal transduction;GO:0042073 intraciliary transport			Cell Junctions(Approved)				0	1	0	0	0	0	0	0	0	0	0	1	0	0	0	0	0	0	0	0	1
2677	GGCX	0	1	2677	Gene_ID	H. sapiens	2677	H. sapiens	GGCX	gamma-glutamyl carboxylase	GO:0017187 peptidyl-glutamic acid carboxylation;GO:0018214 protein carboxylation;GO:0018200 peptidyl-glutamic acid modification		Enzymes/ENZYME proteins/Lyases		Coagulation factor VIIa Recombinant Human (Gamma-glutamyl carboxylase activity);Drotrecogin alfa (Gamma-glutamyl carboxylase activity);Coagulation Factor IX (Recombinant) (Gamma-glutamyl carboxylase activity);L-Glutamic Acid (Gamma-glutamyl carboxylase activity);Menadione (Gamma-glutamyl carboxylase activity);Phylloquinone (Gamma-glutamyl carboxylase activity);Anisindione (Gamma-glutamyl carboxyl…			0	0	0	0	0	0	0	0	0	0	0	0	0	0	0	0	0	0	0	0	1
4675	NAP1L3	1	0	4675	Gene_ID	H. sapiens	4675	H. sapiens	NAP1L3	nucleosome assembly protein 1 like 3	GO:0006334 nucleosome assembly;GO:0031497 chromatin assembly;GO:0034728 nucleosome organization			Vesicles(Approved)				0	0	0	0	1	0	0	0	0	0	0	0	0	1	0	0	0	0	0	0	1
10055	SAE1	1	0	10055	Gene_ID	H. sapiens	10055	H. sapiens	SAE1	SUMO1 activating enzyme subunit 1	GO:1903955 positive regulation of protein targeting to mitochondrion;GO:1903214 regulation of protein targeting to mitochondrion;GO:1903749 positive regulation of establishment of protein localization to mitochondrion							0	0	0	0	0	1	0	0	0	0	0	0	0	0	0	0	0	0	0	0	1
286410	ATP11C	0	1	286410	Gene_ID	H. sapiens	286410	H. sapiens	ATP11C	ATPase phospholipid transporting 11C	GO:0002329 pre-B cell differentiation;GO:0045579 positive regulation of B cell differentiation;GO:0002327 immature B cell differentiation		Enzymes/ENZYME proteins/Hydrolases;Transporters/Primary Active Transporters					0	0	0	0	0	0	0	0	0	0	0	0	0	0	0	0	0	0	0	0	1
151636	DTX3L	1	0	151636	Gene_ID	H. sapiens	151636	H. sapiens	DTX3L	deltex E3 ubiquitin ligase 3L	GO:1902966 positive regulation of protein localization to early endosome;GO:1901666 positive regulation of NAD+ ADP-ribosyltransferase activity;GO:2001034 positive regulation of double-strand break repair via nonhomologous end joining		Enzymes/ENZYME proteins/Transferases	Cytosol;Nucleoplasm(Supported)				0	0	0	0	1	0	0	0	0	1	0	0	0	0	0	0	0	0	0	0	1
54468	MIOS	0	1	54468	Gene_ID	H. sapiens	54468	H. sapiens	MIOS	meiosis regulator for oocyte development	GO:0034198 cellular response to amino acid starvation;GO:1990928 response to amino acid starvation;GO:0032008 positive regulation of TOR signaling			Cytosol;Nucleoplasm(Enhanced)			(M5942)HALLMARK UV RESPONSE DN	0	0	0	0	0	0	0	0	0	0	0	0	0	0	0	0	0	0	0	0	1
2182	ACSL4	0	1	2182	Gene_ID	H. sapiens	2182	H. sapiens	ACSL4	acyl-CoA synthetase long chain family member 4	GO:0035338 long-chain fatty-acyl-CoA biosynthetic process;GO:0046949 fatty-acyl-CoA biosynthetic process;GO:0035336 long-chain fatty-acyl-CoA metabolic process		Enzymes/ENZYME proteins/Ligase	Golgi apparatus;Mitochondria(Approved)	Icosapent (Very long-chain fatty acid-coa ligase activity);Troglitazone (Very long-chain fatty acid-coa ligase activity);Rosiglitazone (Very long-chain fatty acid-coa ligase activity)		(M5949)HALLMARK PEROXISOME; (M5935)HALLMARK FATTY ACID METABOLISM	0	0	0	0	0	0	0	0	0	0	0	0	0	0	0	0	0	0	0	0	1
56852	RAD18	0	1	56852	Gene_ID	H. sapiens	56852	H. sapiens	RAD18	RAD18 E3 ubiquitin protein ligase	GO:0042769 DNA damage response, detection of DNA damage;GO:0006301 postreplication repair;GO:0006513 protein monoubiquitination		Enzymes/ENZYME proteins/Transferases	Nuclear bodies;Nucleoplasm(Enhanced)				0	1	0	0	1	0	0	1	0	0	0	0	0	0	0	0	0	0	0	0	1
1382	CRABP2	0	1	1382	Gene_ID	H. sapiens	1382	H. sapiens	CRABP2	cellular retinoic acid binding protein 2	GO:0048672 positive regulation of collateral sprouting;GO:0048670 regulation of collateral sprouting;GO:0042573 retinoic acid metabolic process			Cytosol;Nucleoplasm(Supported)			(M5949)HALLMARK PEROXISOME	0	0	0	0	0	1	0	0	0	0	0	0	0	0	0	0	0	0	0	1	1
57678	GPAM	1	0	57678	Gene_ID	H. sapiens	57678	H. sapiens	GPAM	glycerol-3-phosphate acyltransferase, mitochondrial	GO:0070236 negative regulation of activation-induced cell death of T cells;GO:0070235 regulation of activation-induced cell death of T cells;GO:0042104 positive regulation of activated T cell proliferation		Enzymes/ENZYME proteins/Transferases	Mitochondria(Approved)		(M66)PID MYC ACTIV PATHWAY	(M5905)HALLMARK ADIPOGENESIS	0	0	0	0	0	0	0	0	0	0	0	0	0	0	0	0	0	0	1	0	1
10162	LPCAT3	1	0	10162	Gene_ID	H. sapiens	10162	H. sapiens	LPCAT3	lysophosphatidylcholine acyltransferase 3	GO:0036150 phosphatidylserine acyl-chain remodeling;GO:0036152 phosphatidylethanolamine acyl-chain remodeling;GO:0036151 phosphatidylcholine acyl-chain remodeling		Enzymes/ENZYME proteins/Transferases				(M5905)HALLMARK ADIPOGENESIS	0	0	0	0	0	0	0	0	0	0	0	0	0	0	0	0	0	0	0	0	1
79921	TCEAL4	0	1	79921	Gene_ID	H. sapiens	79921	H. sapiens	TCEAL4	transcription elongation factor A like 4								0	0	0	0	0	0	0	0	0	0	0	0	0	0	0	0	0	0	0	0	1
3880	KRT19	1	0	3880	Gene_ID	H. sapiens	3880	H. sapiens	KRT19	keratin 19	GO:0070268 cornification;GO:0060706 cell differentiation involved in embryonic placenta development;GO:0045214 sarcomere organization			Intermediate filaments(Supported)		(M229)PID P38 ALPHA BETA DOWNSTREAM PATHWAY	(M5908)HALLMARK ANDROGEN RESPONSE; (M5906)HALLMARK ESTROGEN RESPONSE EARLY; (M5907)HALLMARK ESTROGEN RESPONSE LATE	0	0	0	0	0	1	0	0	0	0	0	0	0	0	0	0	0	0	0	0	1
84679	SLC9A7	1	0	84679	Gene_ID	H. sapiens	84679	H. sapiens	SLC9A7	solute carrier family 9 member A7	GO:1905526 regulation of Golgi lumen acidification;GO:0061795 Golgi lumen acidification;GO:0032847 regulation of cellular pH reduction		Transporters/Electrochemical Potential-driven transporters	Vesicles(Supported)				0	0	0	0	0	0	0	0	0	0	0	0	0	0	0	0	0	0	0	0	1
10092	ARPC5	0	1	10092	Gene_ID	H. sapiens	10092	H. sapiens	ARPC5	actin related protein 2/3 complex subunit 5	GO:0021769 orbitofrontal cortex development;GO:0034314 Arp2/3 complex-mediated actin nucleation;GO:0038096 Fc-gamma receptor signaling pathway involved in phagocytosis			Cell Junctions;Cytosol;Plasma membrane;Vesicles(Approved)	N-[2-(2-methyl-1H-indol-3-yl)ethyl]thiophene-2-carboxamide (Structural constituent of cytoskeleton);(2S)-2-(3-bromophenyl)-3-(5-chloro-2-hydroxyphenyl)-1,3-thiazolidin-4-one (Structural constituent of cytoskeleton)	(M278)PID RAC1 PATHWAY; (M81)PID CDC42 PATHWAY; (M164)PID ERBB1 DOWNSTREAM PATHWAY		1	0	0	0	0	1	0	0	0	0	0	0	0	0	0	0	0	0	0	0	1
259173	ALS2CL	1	0	259173	Gene_ID	H. sapiens	259173	H. sapiens	ALS2CL	ALS2 C-terminal like	GO:0007032 endosome organization;GO:0043547 positive regulation of GTPase activity;GO:0043087 regulation of GTPase activity							0	0	0	0	0	0	0	0	0	0	0	0	0	0	0	0	0	0	0	0	1
4436	MSH2	0	1	4436	Gene_ID	H. sapiens	4436	H. sapiens	MSH2	mutS homolog 2	GO:0048298 positive regulation of isotype switching to IgA isotypes;GO:0048304 positive regulation of isotype switching to IgG isotypes;GO:0048296 regulation of isotype switching to IgA isotypes			Nucleoplasm;Vesicles(Supported)		(M145)PID P53 DOWNSTREAM PATHWAY	(M5949)HALLMARK PEROXISOME; (M5925)HALLMARK E2F TARGETS	0	0	1	0	1	0	0	0	0	1	0	0	0	0	0	0	0	0	0	0	1
10460	TACC3	1	0	10460	Gene_ID	H. sapiens	10460	H. sapiens	TACC3	transforming acidic coiled-coil containing protein 3	GO:0007091 metaphase/anaphase transition of mitotic cell cycle;GO:0060236 regulation of mitotic spindle organization;GO:0021987 cerebral cortex development			Mitotic spindle(Enhanced)Centrosome;Cytosol;Microtubule organizing center(Supported)Vesicles(Approved)		(M242)PID AURORA A PATHWAY; (M71)PID ILK PATHWAY	(M5925)HALLMARK E2F TARGETS; (M5901)HALLMARK G2M CHECKPOINT	0	1	1	0	0	1	0	1	0	0	0	0	0	0	0	0	0	0	0	0	1
84281	C2orf88	0	1	84281	Gene_ID	H. sapiens	84281	H. sapiens	C2orf88	chromosome 2 open reading frame 88								0	0	0	0	0	0	0	0	0	0	0	0	0	0	0	0	0	0	0	0	1
57484	RNF150	0	1	57484	Gene_ID	H. sapiens	57484	H. sapiens	RNF150	ring finger protein 150	GO:0006511 ubiquitin-dependent protein catabolic process;GO:0019941 modification-dependent protein catabolic process;GO:0051603 proteolysis involved in cellular protein catabolic process							0	0	0	0	0	0	0	0	0	0	0	0	0	0	0	0	0	0	0	0	1
5228	PGF	1	0	5228	Gene_ID	H. sapiens	5228	H. sapiens	PGF	placental growth factor	GO:0001658 branching involved in ureteric bud morphogenesis;GO:0060754 positive regulation of mast cell chemotaxis;GO:0060675 ureteric bud morphogenesis		RAS pathway related proteins	Cytosol;Mitochondria;Nucleoplasm(Approved)	Aflibercept (Heparin binding)	(M137)PID VEGF VEGFR PATHWAY; (M226)PID VEGFR1 PATHWAY; (M5883)NABA SECRETED FACTORS	(M5891)HALLMARK HYPOXIA	0	1	0	0	0	0	0	0	0	0	0	0	1	0	0	0	1	0	0	1	1
10236	HNRNPR	0	1	10236	Gene_ID	H. sapiens	10236	H. sapiens	HNRNPR	heterogeneous nuclear ribonucleoprotein R	GO:0061157 mRNA destabilization;GO:0061014 positive regulation of mRNA catabolic process;GO:0050779 RNA destabilization			Nucleoplasm(Enhanced)			(M5926)HALLMARK MYC TARGETS V1	0	0	0	0	0	0	0	0	0	0	0	0	0	0	0	0	0	0	0	0	1
6772	STAT1	0	1	6772	Gene_ID	H. sapiens	6772	H. sapiens	STAT1	signal transducer and activator of transcription 1	GO:0072308 negative regulation of metanephric nephron tubule epithelial cell differentiation;GO:0003340 negative regulation of mesenchymal to epithelial transition involved in metanephros morphogenesis;GO:0072183 negative regulation of nephron tubule epithelial cell differentiation		Transcription factors/Immunoglobulin fold	Cytosol;Nucleoplasm(Enhanced)		(M19336)ST TYPE I INTERFERON PATHWAY; (M4170)ST INTERFERON GAMMA PATHWAY; (M36)PID IL27 PATHWAY	(M5897)HALLMARK IL6 JAK STAT3 SIGNALING; (M5913)HALLMARK INTERFERON GAMMA RESPONSE; (M5950)HALLMARK ALLOGRAFT REJECTION	0	0	0	0	0	0	0	0	0	0	0	0	1	0	0	0	0	0	0	0	1
83463	MXD3	0	1	83463	Gene_ID	H. sapiens	83463	H. sapiens	MXD3	MAX dimerization protein 3	GO:0000122 negative regulation of transcription by RNA polymerase II;GO:0045892 negative regulation of transcription, DNA-templated;GO:1903507 negative regulation of nucleic acid-templated transcription		Transcription factors/Basic domains	Nucleoli;Nucleus(Approved)			(M5925)HALLMARK E2F TARGETS	0	0	0	0	0	0	0	0	0	0	0	0	0	0	0	0	0	0	0	0	1
2239	GPC4	0	1	2239	Gene_ID	H. sapiens	2239	H. sapiens	GPC4	glypican 4	GO:0098696 regulation of neurotransmitter receptor localization to postsynaptic specialization membrane;GO:0099645 neurotransmitter receptor localization to postsynaptic specialization membrane;GO:0060071 Wnt signaling pathway, planar cell polarity pathway			Vesicles(Approved)		(M5880)NABA ECM AFFILIATED; (M5885)NABA MATRISOME ASSOCIATED; (M5889)NABA MATRISOME	(M5937)HALLMARK GLYCOLYSIS; (M5891)HALLMARK HYPOXIA	0	0	0	0	0	0	0	0	0	0	0	0	0	0	0	0	0	0	0	0	1
6744	SSFA2	0	1	6744	Gene_ID	H. sapiens	6744	H. sapiens	ITPRID2	ITPR interacting domain containing 2				Cytosol(Supported)Nucleus;Plasma membrane(Approved)				0	0	0	0	0	0	0	0	0	0	0	0	0	0	0	0	0	0	0	0	1
4739	NEDD9	0	1	4739	Gene_ID	H. sapiens	4739	H. sapiens	NEDD9	neural precursor cell expressed, developmentally down-regulated 9	GO:0090527 actin filament reorganization;GO:1900026 positive regulation of substrate adhesion-dependent cell spreading;GO:0061098 positive regulation of protein tyrosine kinase activity			Cytosol;Nucleoplasm(Supported)Plasma membrane(Approved)			(M5902)HALLMARK APOPTOSIS; (M5893)HALLMARK MITOTIC SPINDLE	0	1	0	0	0	1	0	0	0	0	0	0	1	0	0	0	0	0	1	1	1
3431	SP110	0	1	3431	Gene_ID	H. sapiens	3431	H. sapiens	SP110	SP110 nuclear body protein	GO:0016032 viral process;GO:0044403 symbiont process;GO:0044419 interspecies interaction between organisms		Transcription factors	Nucleus(Supported)			(M5911)HALLMARK INTERFERON ALPHA RESPONSE; (M5913)HALLMARK INTERFERON GAMMA RESPONSE	0	0	0	0	0	0	0	0	0	0	0	0	0	0	0	0	0	0	0	0	1
51200	CPA4	1	0	51200	Gene_ID	H. sapiens	51200	H. sapiens	CPA4	carboxypeptidase A4	GO:0016573 histone acetylation;GO:0018393 internal peptidyl-lysine acetylation;GO:0006475 internal protein amino acid acetylation		Enzymes/Peptidases/Metallopeptidases	Centrosome;Cytosol;Nucleoplasm(Approved)				0	0	0	0	0	0	0	0	0	0	0	0	0	0	0	0	0	0	0	0	1
132671	SPATA18	1	0	132671	Gene_ID	H. sapiens	132671	H. sapiens	SPATA18	spermatogenesis associated 18	GO:0035695 mitophagy by induced vacuole formation;GO:0035694 mitochondrial protein catabolic process;GO:0000422 autophagy of mitochondrion					(M256)PID TAP63 PATHWAY		0	0	0	0	0	0	0	0	0	0	0	0	0	0	0	0	0	0	0	0	1
55346	TCP11L1	0	1	55346	Gene_ID	H. sapiens	55346	H. sapiens	TCP11L1	t-complex 11 like 1				Cytosol(Approved)				0	0	0	0	0	0	0	0	0	0	0	0	0	0	0	0	0	0	0	0	1
5984	RFC4	0	1	5984	Gene_ID	H. sapiens	5984	H. sapiens	RFC4	replication factor C subunit 4	GO:1900264 positive regulation of DNA-directed DNA polymerase activity;GO:0032201 telomere maintenance via semi-conservative replication;GO:0070987 error-free translesion synthesis			Nucleoplasm(Enhanced)		(M46)PID ATR PATHWAY; (M1)PID FANCONI PATHWAY	(M5951)HALLMARK SPERMATOGENESIS; (M5898)HALLMARK DNA REPAIR; (M5941)HALLMARK UV RESPONSE UP	1	0	0	1	1	0	0	0	0	1	0	0	0	1	0	0	0	0	0	0	1
23181	DIP2A	1	0	23181	Gene_ID	H. sapiens	23181	H. sapiens	DIP2A	disco interacting protein 2 homolog A	GO:0042981 regulation of apoptotic process;GO:0043067 regulation of programmed cell death;GO:0006915 apoptotic process			Nucleus(Approved)				0	0	0	0	0	0	0	0	0	0	0	0	0	0	0	0	0	0	0	0	1
93081	TEX30	0	1	93081	Gene_ID	H. sapiens	93081	H. sapiens	TEX30	testis expressed 30								0	0	0	0	0	0	0	0	0	0	0	0	0	0	0	0	0	0	0	0	1
84885	ZDHHC12	1	0	84885	Gene_ID	H. sapiens	84885	H. sapiens	ZDHHC12	zinc finger DHHC-type palmitoyltransferase 12	GO:0018230 peptidyl-L-cysteine S-palmitoylation;GO:0018345 protein palmitoylation;GO:0018231 peptidyl-S-diacylglycerol-L-cysteine biosynthetic process from peptidyl-cysteine		Enzymes/ENZYME proteins/Transferases	Nucleoplasm(Approved)				0	0	0	0	0	0	0	0	0	0	0	0	0	0	0	0	0	0	0	0	1
100506403	LOC100506403	0	1	100506403	Gene_ID	H. sapiens	100506403	H. sapiens	LOC100506403	uncharacterized LOC100506403			Transcription factors/Immunoglobulin fold	Nucleoplasm;Vesicles(Enhanced)				0	0	0	0	0	0	0	0	0	0	0	0	0	0	0	0	0	0	0	0	1
55706	NDC1	0	1	55706	Gene_ID	H. sapiens	55706	H. sapiens	NDC1	NDC1 transmembrane nucleoporin	GO:0006409 tRNA export from nucleus;GO:0006110 regulation of glycolytic process;GO:0071431 tRNA-containing ribonucleoprotein complex export from nucleus		Transporters/Transporter channels and pores	Nuclear membrane(Supported)Plasma membrane(Approved)Actin filaments(Uncertain)				1	1	0	0	0	0	0	0	0	1	0	0	0	0	0	1	0	0	0	0	1
7145	TNS1	0	1	7145	Gene_ID	H. sapiens	7145	H. sapiens	TNS1	tensin 1	GO:0010761 fibroblast migration;GO:0007044 cell-substrate junction assembly;GO:0034329 cell junction assembly			Focal adhesion sites(Enhanced)		(M71)PID ILK PATHWAY	(M5945)HALLMARK HEME METABOLISM	0	0	0	0	0	0	0	0	0	0	0	0	1	0	0	0	0	0	0	0	1
2036	EPB41L1	0	1	2036	Gene_ID	H. sapiens	2036	H. sapiens	EPB41L1	erythrocyte membrane protein band 4.1 like 1	GO:0030866 cortical actin cytoskeleton organization;GO:0030865 cortical cytoskeleton organization;GO:0031032 actomyosin structure organization			Plasma membrane(Supported)		(M271)PID PI3K PLC TRK PATHWAY		0	0	0	0	0	1	0	0	0	0	0	0	0	0	0	0	0	0	0	0	1
25960	ADGRA2	1	0	25960	Gene_ID	H. sapiens	25960	H. sapiens	ADGRA2	adhesion G protein-coupled receptor A2	GO:1900747 negative regulation of vascular endothelial growth factor signaling pathway;GO:1902548 negative regulation of cellular response to vascular endothelial growth factor stimulus;GO:0090210 regulation of establishment of blood-brain barrier		G-protein coupled receptors/{Family 2 (B) receptors,GPCRs excl olfactory receptors}			(M160)PID AVB3 INTEGRIN PATHWAY	(M5953)HALLMARK KRAS SIGNALING UP	0	0	0	0	0	0	0	0	0	0	0	0	1	0	0	0	0	0	0	1	1
5708	PSMD2	0	1	5708	Gene_ID	H. sapiens	5708	H. sapiens	PSMD2	proteasome 26S subunit, non-ATPase 2	GO:0002223 stimulatory C-type lectin receptor signaling pathway;GO:0002479 antigen processing and presentation of exogenous peptide antigen via MHC class I, TAP-dependent;GO:0002220 innate immune response activating cell surface receptor signaling pathway							1	0	1	1	0	0	0	0	0	0	0	1	0	0	0	0	0	0	0	0	1
6431	SRSF6	1	0	6431	Gene_ID	H. sapiens	6431	H. sapiens	SRSF6	serine and arginine rich splicing factor 6	GO:0060501 positive regulation of epithelial cell proliferation involved in lung morphogenesis;GO:2000675 negative regulation of type B pancreatic cell apoptotic process;GO:2000794 regulation of epithelial cell proliferation involved in lung morphogenesis			Nuclear speckles(Supported)			(M5898)HALLMARK DNA REPAIR	0	0	0	0	0	0	0	0	0	0	0	0	1	0	0	0	0	0	0	0	1
899	CCNF	0	1	899	Gene_ID	H. sapiens	899	H. sapiens	CCNF	cyclin F	GO:0010826 negative regulation of centrosome duplication;GO:0046606 negative regulation of centrosome cycle;GO:0010824 regulation of centrosome duplication			Centrosome(Supported)			(M5924)HALLMARK MTORC1 SIGNALING; (M5901)HALLMARK G2M CHECKPOINT	0	1	1	0	0	1	0	0	0	0	0	0	0	0	1	0	0	0	0	0	1
84929	FIBCD1	1	0	84929	Gene_ID	H. sapiens	84929	H. sapiens	FIBCD1	fibrinogen C domain containing 1				Cell Junctions(Supported)				0	0	0	0	0	0	0	0	0	0	0	0	0	0	0	0	0	0	0	0	1
4281	MID1	1	0	4281	Gene_ID	H. sapiens	4281	H. sapiens	MID1	midline 1	GO:0007026 negative regulation of microtubule depolymerization;GO:0035372 protein localization to microtubule;GO:0031114 regulation of microtubule depolymerization		Enzymes/ENZYME proteins/Transferases				(M5893)HALLMARK MITOTIC SPINDLE	0	1	0	0	0	1	0	0	0	0	0	0	0	0	1	0	0	0	0	0	1
374393	FAM111B	0	1	374393	Gene_ID	H. sapiens	374393	H. sapiens	FAM111B	family with sequence similarity 111 member B				Cytosol;Nucleus(Approved)				0	0	0	0	0	0	0	0	0	0	0	0	0	0	0	0	0	0	0	0	1
2263	FGFR2	1	0	2263	Gene_ID	H. sapiens	2263	H. sapiens	FGFR2	fibroblast growth factor receptor 2	GO:0035602 fibroblast growth factor receptor signaling pathway involved in negative regulation of apoptotic process in bone marrow;GO:0060595 fibroblast growth factor receptor signaling pathway involved in mammary gland specification;GO:0060615 mammary gland bud formation	Tyr protein kinase family	CD markers;Enzymes/{ENZYME proteins/Transferases,Kinases/Tyr protein kinases};RAS pathway related proteins	Vesicles(Approved)	Palifermin (Protein tyrosine kinase activity);Thalidomide (Protein tyrosine kinase activity);SU4984 (Protein tyrosine kinase activity);4-[4-(1-Amino-1-Methylethyl)Phenyl]-5-Chloro-N-[4-(2-Morpholin-4-Ylethyl)Phenyl]Pyrimidin-2-Amine (Protein tyrosine kinase activity);Regorafenib (Protein tyrosine kinase activity);Ponatinib (Protein tyrosine kinase activity);Lenvatinib (Protein tyrosine kinase act…	(M276)PID FGF PATHWAY		0	1	0	0	0	0	0	0	0	0	1	0	1	0	0	0	1	0	0	1	1
1031	CDKN2C	1	0	1031	Gene_ID	H. sapiens	1031	H. sapiens	CDKN2C	cyclin dependent kinase inhibitor 2C	GO:0045736 negative regulation of cyclin-dependent protein serine/threonine kinase activity;GO:1904030 negative regulation of cyclin-dependent protein kinase activity;GO:2000134 negative regulation of G1/S transition of mitotic cell cycle			Cytosol;Nucleoplasm(Approved)		(M40)PID E2F PATHWAY	(M5905)HALLMARK ADIPOGENESIS; (M5925)HALLMARK E2F TARGETS; (M5901)HALLMARK G2M CHECKPOINT	1	0	1	1	0	0	0	0	0	0	0	0	0	0	0	0	0	0	0	0	1
3892	KRT86	1	0	3892	Gene_ID	H. sapiens	3892	H. sapiens	KRT86	keratin 86	GO:0070268 cornification;GO:0031424 keratinization;GO:0030216 keratinocyte differentiation			Cytosol(Approved)				0	0	0	0	0	0	0	0	0	0	0	0	0	0	0	0	0	0	0	0	1
6632	SNRPD1	0	1	6632	Gene_ID	H. sapiens	6632	H. sapiens	SNRPD1	small nuclear ribonucleoprotein D1 polypeptide	GO:0000387 spliceosomal snRNP assembly;GO:0000245 spliceosomal complex assembly;GO:0051170 import into nucleus						(M5901)HALLMARK G2M CHECKPOINT; (M5926)HALLMARK MYC TARGETS V1	0	0	0	0	0	0	0	0	0	0	0	0	0	0	0	0	0	0	0	0	1
5806	PTX3	0	1	5806	Gene_ID	H. sapiens	5806	H. sapiens	PTX3	pentraxin 3	GO:0044869 negative regulation by host of viral exo-alpha-sialidase activity;GO:0044866 modulation by host of viral exo-alpha-sialidase activity;GO:0052403 negative regulation by host of symbiont catalytic activity					(M2701)ST MYOCYTE AD PATHWAY; (M19043)ST ADRENERGIC	(M5930)HALLMARK EPITHELIAL MESENCHYMAL TRANSITION; (M5890)HALLMARK TNFA SIGNALING VIA NFKB	0	0	0	0	0	0	0	0	0	0	0	0	0	0	0	0	0	0	0	0	1
3181	HNRNPA2B1	0	1	3181	Gene_ID	H. sapiens	3181	H. sapiens	HNRNPA2B1	heterogeneous nuclear ribonucleoprotein A2/B1	GO:1905663 positive regulation of telomerase RNA reverse transcriptase activity;GO:1905661 regulation of telomerase RNA reverse transcriptase activity;GO:1990428 miRNA transport			Nucleoplasm(Enhanced)			(M5926)HALLMARK MYC TARGETS V1	0	0	0	0	1	1	0	1	0	1	0	0	0	0	0	0	0	0	0	0	1
6745	SSR1	0	1	6745	Gene_ID	H. sapiens	6745	H. sapiens	SSR1	signal sequence receptor subunit 1	GO:0006613 cotranslational protein targeting to membrane;GO:0036498 IRE1-mediated unfolded protein response;GO:0030968 endoplasmic reticulum unfolded protein response			Endoplasmic reticulum(Supported)			(M5922)HALLMARK UNFOLDED PROTEIN RESPONSE; (M5924)HALLMARK MTORC1 SIGNALING	0	0	0	0	0	0	0	0	0	0	0	0	0	0	0	0	0	0	0	0	1
64943	NT5DC2	1	0	64943	Gene_ID	H. sapiens	64943	H. sapiens	NT5DC2	5'-nucleotidase domain containing 2	GO:0016311 dephosphorylation;GO:0006796 phosphate-containing compound metabolic process;GO:0006793 phosphorus metabolic process							0	0	0	0	0	0	0	0	0	0	0	0	0	0	0	0	0	0	0	0	1
55839	CENPN	1	0	55839	Gene_ID	H. sapiens	55839	H. sapiens	CENPN	centromere protein N	GO:0034080 CENP-A containing nucleosome assembly;GO:0006336 DNA replication-independent nucleosome assembly;GO:0051382 kinetochore assembly			Nucleus(Supported)			(M5908)HALLMARK ANDROGEN RESPONSE	1	1	0	0	1	0	0	0	0	0	0	0	0	1	0	0	0	0	0	0	1
6726	SRP9	0	1	6726	Gene_ID	H. sapiens	6726	H. sapiens	SRP9	signal recognition particle 9	GO:0045900 negative regulation of translational elongation;GO:0006614 SRP-dependent cotranslational protein targeting to membrane;GO:0006613 cotranslational protein targeting to membrane		Transporters/Primary Active Transporters			(M182)PID IL3 PATHWAY	(M5957)HALLMARK PANCREAS BETA CELLS	0	0	0	0	0	0	0	0	0	0	0	0	0	0	0	0	0	0	0	0	1
50940	PDE11A	1	0	50940	Gene_ID	H. sapiens	50940	H. sapiens	PDE11A	phosphodiesterase 11A	GO:0010754 negative regulation of cGMP-mediated signaling;GO:0043951 negative regulation of cAMP-mediated signaling;GO:0010752 regulation of cGMP-mediated signaling		Enzymes/ENZYME proteins/Hydrolases		Tadalafil (Metal ion binding)			0	0	0	0	0	0	0	0	0	0	0	0	0	0	0	0	0	1	0	0	1
4638	MYLK	0	1	4638	Gene_ID	H. sapiens	4638	H. sapiens	MYLK	myosin light chain kinase	GO:0060414 aorta smooth muscle tissue morphogenesis;GO:0035909 aorta morphogenesis;GO:0071476 cellular hypotonic response	CAMK Ser/Thr protein kinase family	Enzymes/{ENZYME proteins/Transferases,Kinases/CAMK Ser/Thr protein kinases}	Actin filaments(Enhanced)Plasma membrane(Supported)		(M16801)SIG REGULATION OF THE ACTIN CYTOSKELETON BY RHO GTPASES; (M14)PID AURORA B PATHWAY; (M5193)SIG CHEMOTAXIS	(M5905)HALLMARK ADIPOGENESIS; (M5909)HALLMARK MYOGENESIS; (M5930)HALLMARK EPITHELIAL MESENCHYMAL TRANSITION	1	0	0	0	0	0	0	0	0	0	0	0	1	0	0	0	0	0	0	0	1
2175	FANCA	1	0	2175	Gene_ID	H. sapiens	2175	H. sapiens	FANCA	FA complementation group A	GO:0045589 regulation of regulatory T cell differentiation;GO:0045066 regulatory T cell differentiation;GO:2000348 regulation of CD40 signaling pathway			Nucleus(Supported)		(M258)PID BARD1 PATHWAY; (M1)PID FANCONI PATHWAY		0	1	0	0	1	0	0	0	0	0	0	0	0	0	0	1	0	0	0	0	1
7280	TUBB2A	0	1	7280	Gene_ID	H. sapiens	7280	H. sapiens	TUBB2A	tubulin beta 2A class IIa	GO:0001764 neuron migration;GO:0000226 microtubule cytoskeleton organization;GO:0016477 cell migration			Microtubules(Supported)	CYT997 (Structural constituent of cytoskeleton)	(M32)PID HDAC CLASSIII PATHWAY; (M30)PID HDAC CLASSII PATHWAY	(M5922)HALLMARK UNFOLDED PROTEIN RESPONSE; (M5890)HALLMARK TNFA SIGNALING VIA NFKB	1	0	0	0	0	0	0	0	0	0	0	1	0	0	0	0	0	1	0	0	1
2764	GMFB	0	1	2764	Gene_ID	H. sapiens	2764	H. sapiens	GMFB	glia maturation factor beta	GO:0034316 negative regulation of Arp2/3 complex-mediated actin nucleation;GO:0051126 negative regulation of actin nucleation;GO:0034315 regulation of Arp2/3 complex-mediated actin nucleation			Cytosol;Nuclear bodies;Nucleoplasm(Approved)			(M5921)HALLMARK COMPLEMENT	0	0	0	0	0	1	0	0	0	0	0	0	0	0	1	0	0	0	0	0	1
7296	TXNRD1	0	1	7296	Gene_ID	H. sapiens	7296	H. sapiens	TXNRD1	thioredoxin reductase 1	GO:0001887 selenium compound metabolic process;GO:0015949 nucleobase-containing small molecule interconversion;GO:0001707 mesoderm formation		Enzymes/ENZYME proteins/Oxidoreductases	Nucleus(Supported)	Arsenic trioxide (Thioredoxin-disulfide reductase activity);Nadph Dihydro-Nicotinamide-Adenine-Dinucleotidephosphate (Thioredoxin-disulfide reductase activity);Flavin adenine dinucleotide (Thioredoxin-disulfide reductase activity);Spermidine (Thioredoxin-disulfide reductase activity);Fotemustine (Thioredoxin-disulfide reductase activity);motexafin gadolinium (Thioredoxin-disulfide reductase activ…		(M5938)HALLMARK REACTIVE OXIGEN SPECIES PATHWAY; (M5924)HALLMARK MTORC1 SIGNALING	0	0	0	0	0	0	0	0	0	0	0	0	0	0	0	0	0	0	0	0	1
2037	EPB41L2	1	0	2037	Gene_ID	H. sapiens	2037	H. sapiens	EPB41L2	erythrocyte membrane protein band 4.1 like 2	GO:1904778 positive regulation of protein localization to cell cortex;GO:1904776 regulation of protein localization to cell cortex;GO:0072697 protein localization to cell cortex			Plasma membrane(Enhanced)Cell Junctions;Nucleus(Supported)			(M5893)HALLMARK MITOTIC SPINDLE; (M5915)HALLMARK APICAL JUNCTION	0	1	0	0	0	1	0	0	0	0	0	0	0	0	0	0	0	0	0	0	1
9401	RECQL4	1	0	9401	Gene_ID	H. sapiens	9401	H. sapiens	RECQL4	RecQ like helicase 4	GO:0061820 telomeric D-loop disassembly;GO:0090657 telomeric loop disassembly;GO:0000733 DNA strand renaturation			Nucleus(Enhanced)				0	0	0	1	1	0	0	0	0	0	0	0	0	0	0	0	0	0	0	0	1
103910	MYL12B	0	1	103910	Gene_ID	H. sapiens	103910	H. sapiens	MYL12B	myosin light chain 12B	GO:0008360 regulation of cell shape;GO:0006936 muscle contraction;GO:0022604 regulation of cell morphogenesis			Nucleoli fibrillar center;Nucleus(Approved)			(M5915)HALLMARK APICAL JUNCTION	1	0	0	0	0	0	0	0	0	0	0	0	0	0	0	0	0	0	0	1	1
54464	XRN1	1	0	54464	Gene_ID	H. sapiens	54464	H. sapiens	XRN1	5'-3' exoribonuclease 1	GO:1905795 cellular response to puromycin;GO:1905794 response to puromycin;GO:0071409 cellular response to cycloheximide			Cytosol;Plasma membrane(Supported)				0	0	0	0	0	0	0	1	0	0	0	0	0	0	1	0	0	0	0	0	1
162	AP1B1	0	1	162	Gene_ID	H. sapiens	162	H. sapiens	AP1B1	adaptor related protein complex 1 subunit beta 1	GO:0050690 regulation of defense response to virus by virus;GO:0019886 antigen processing and presentation of exogenous peptide antigen via MHC class II;GO:0002495 antigen processing and presentation of peptide antigen via MHC class II			Golgi apparatus;Vesicles(Supported)		(M285)PID HNF3A PATHWAY; (M200)PID ERA GENOMIC PATHWAY		0	0	0	0	0	0	0	0	0	0	0	0	0	0	0	0	0	0	0	0	1
63971	KIF13A	1	0	63971	Gene_ID	H. sapiens	63971	H. sapiens	KIF13A	kinesin family member 13A	GO:0072383 plus-end-directed vesicle transport along microtubule;GO:0072386 plus-end-directed organelle transport along microtubule;GO:0032438 melanosome organization							0	1	1	0	0	0	0	0	0	0	0	0	0	0	0	0	1	0	0	0	1
801	CALM1	0	1	801	Gene_ID	H. sapiens	801	H. sapiens	CALM1	calmodulin 1	GO:0010881 regulation of cardiac muscle contraction by regulation of the release of sequestered calcium ion;GO:0060316 positive regulation of ryanodine-sensitive calcium-release channel activity;GO:0060315 negative regulation of ryanodine-sensitive calcium-release channel activity		RAS pathway related proteins;Transporters/Accessory Factors Involved in Transport	Vesicles(Approved)			(M5921)HALLMARK COMPLEMENT	1	1	1	0	0	0	0	0	0	0	0	1	0	0	0	0	1	1	0	0	1
1175	AP2S1	0	1	1175	Gene_ID	H. sapiens	1175	H. sapiens	AP2S1	adaptor related protein complex 2 subunit sigma 1	GO:0032802 low-density lipoprotein particle receptor catabolic process;GO:0050690 regulation of defense response to virus by virus;GO:0060071 Wnt signaling pathway, planar cell polarity pathway						(M5910)HALLMARK PROTEIN SECRETION; (M5941)HALLMARK UV RESPONSE UP	0	0	0	0	0	0	0	0	0	0	0	0	0	0	0	0	0	0	0	0	1
23704	KCNE4	0	1	23704	Gene_ID	H. sapiens	23704	H. sapiens	KCNE4	potassium voltage-gated channel subfamily E regulatory subunit 4	GO:1902260 negative regulation of delayed rectifier potassium channel activity;GO:1903817 negative regulation of voltage-gated potassium channel activity;GO:0098915 membrane repolarization during ventricular cardiac muscle cell action potential			Microtubules;Nuclear bodies(Approved)				0	0	0	0	0	1	0	0	0	0	0	0	0	0	0	0	0	0	0	0	1
9590	AKAP12	0	1	9590	Gene_ID	H. sapiens	9590	H. sapiens	AKAP12	A-kinase anchoring protein 12	GO:0061870 positive regulation of hepatic stellate cell migration;GO:1900143 positive regulation of oligodendrocyte apoptotic process;GO:0061869 regulation of hepatic stellate cell migration			Cytosol;Plasma membrane(Supported)			(M5908)HALLMARK ANDROGEN RESPONSE; (M5953)HALLMARK KRAS SIGNALING UP; (M5891)HALLMARK HYPOXIA	0	0	0	0	0	0	0	0	0	0	0	0	1	0	0	0	0	0	0	0	1
6872	TAF1	1	0	6872	Gene_ID	H. sapiens	6872	H. sapiens	TAF1	TATA-box binding protein associated factor 1	GO:2000825 positive regulation of androgen receptor activity;GO:2000823 regulation of androgen receptor activity;GO:0010768 negative regulation of transcription from RNA polymerase II promoter in response to UV-induced DNA damage		Enzymes/ENZYME proteins/Transferases;Transcription factors/Other all-alpha-helical DNA-binding domains	Nucleoplasm(Enhanced)		(M279)PID RB 1PATHWAY		0	0	1	0	0	1	0	0	0	0	0	0	0	1	0	0	0	0	0	0	1
9848	MFAP3L	0	1	9848	Gene_ID	H. sapiens	9848	H. sapiens	MFAP3L	microfibril associated protein 3 like								0	0	0	0	0	0	0	0	0	0	0	0	0	0	0	0	0	0	0	0	1
5732	PTGER2	0	1	5732	Gene_ID	H. sapiens	5732	H. sapiens	PTGER2	prostaglandin E receptor 2	GO:1904346 positive regulation of gastric mucosal blood circulation;GO:1904344 regulation of gastric mucosal blood circulation;GO:1990768 gastric mucosal blood circulation		G-protein coupled receptors/GPCRs excl olfactory receptors		Alprostadil (Prostaglandin e receptor activity);Dinoprostone (Prostaglandin e receptor activity);Misoprostol (Prostaglandin e receptor activity)		(M5947)HALLMARK IL2 STAT5 SIGNALING; (M5932)HALLMARK INFLAMMATORY RESPONSE	0	0	0	0	0	0	0	0	0	0	0	0	0	0	0	0	0	0	0	0	1
84913	ATOH8	1	0	84913	Gene_ID	H. sapiens	84913	H. sapiens	ATOH8	atonal bHLH transcription factor 8	GO:0045603 positive regulation of endothelial cell differentiation;GO:1902895 positive regulation of pri-miRNA transcription by RNA polymerase II;GO:0010595 positive regulation of endothelial cell migration		Transcription factors/Basic domains	Nucleoplasm(Supported)			(M5934)HALLMARK XENOBIOTIC METABOLISM	0	0	0	0	0	0	0	0	0	0	0	0	1	0	0	0	0	0	0	0	1
64841	GNPNAT1	0	1	64841	Gene_ID	H. sapiens	64841	H. sapiens	GNPNAT1	glucosamine-phosphate N-acetyltransferase 1	GO:0006041 glucosamine metabolic process;GO:0006048 UDP-N-acetylglucosamine biosynthetic process;GO:0006044 N-acetylglucosamine metabolic process		Enzymes/ENZYME proteins/Transferases					0	0	0	0	0	0	0	0	0	0	0	0	0	0	0	0	0	0	0	0	1
5740	PTGIS	1	0	5740	Gene_ID	H. sapiens	5740	H. sapiens	PTGIS	prostaglandin I2 synthase	GO:0019371 cyclooxygenase pathway;GO:0034356 NAD biosynthesis via nicotinamide riboside salvage pathway;GO:0001516 prostaglandin biosynthetic process		Enzymes/ENZYME proteins/Isomerase	Endoplasmic reticulum(Approved)	Phenylbutazone (Prostaglandin-i synthase activity);Epoprostenol (Prostaglandin-i synthase activity);(6E)-7-{6-[(1E)-OCT-1-ENYL]-2,3-DIAZABICYCLO[2.2.1]HEPT-2-EN-5-YL}HEPT-6-ENOIC ACID (Prostaglandin-i synthase activity)		(M5909)HALLMARK MYOGENESIS	0	0	0	0	0	0	0	0	0	0	0	0	1	0	0	0	0	0	0	0	1
54855	FAM46C	1	0	54855	Gene_ID	H. sapiens	54855	H. sapiens	TENT5C	terminal nucleotidyltransferase 5C	GO:0048255 mRNA stabilization;GO:1902373 negative regulation of mRNA catabolic process;GO:0043489 RNA stabilization			Nucleoplasm(Approved)			(M5956)HALLMARK KRAS SIGNALING DN; (M5945)HALLMARK HEME METABOLISM	0	0	0	0	0	0	0	0	0	0	0	0	0	0	0	0	0	0	0	0	1
257068	PLCXD2	1	0	257068	Gene_ID	H. sapiens	257068	H. sapiens	PLCXD2	phosphatidylinositol specific phospholipase C X domain containing 2	GO:0016042 lipid catabolic process;GO:0006629 lipid metabolic process;GO:1901575 organic substance catabolic process			Nucleoplasm(Approved)				0	0	0	0	0	0	0	0	0	0	0	0	0	0	0	0	0	0	0	0	1
344558	SH3RF3	0	1	344558	Gene_ID	H. sapiens	344558	H. sapiens	SH3RF3	SH3 domain containing ring finger 3	GO:0046330 positive regulation of JNK cascade;GO:0032874 positive regulation of stress-activated MAPK cascade;GO:0046328 regulation of JNK cascade			Nucleoplasm(Enhanced)Centrosome;Cytosol(Approved)				0	0	0	0	0	0	0	0	0	1	0	0	0	0	0	0	0	0	0	0	1
90488	TMEM263	0	1	90488	Gene_ID	H. sapiens	90488	H. sapiens	TMEM263	transmembrane protein 263								0	0	0	0	0	0	0	0	0	0	0	0	0	0	0	0	0	0	0	0	1
9088	PKMYT1	1	0	9088	Gene_ID	H. sapiens	9088	H. sapiens	PKMYT1	protein kinase, membrane associated tyrosine/threonine 1	GO:0000079 regulation of cyclin-dependent protein serine/threonine kinase activity;GO:0010923 negative regulation of phosphatase activity;GO:1904029 regulation of cyclin-dependent protein kinase activity	Other	Enzymes/{ENZYME proteins/Transferases,Kinases}	Golgi apparatus(Supported)Nucleoli;Nucleus(Approved)				1	1	1	1	0	0	0	1	0	0	0	1	0	0	0	0	0	0	0	0	1
3251	HPRT1	0	1	3251	Gene_ID	H. sapiens	3251	H. sapiens	HPRT1	hypoxanthine phosphoribosyltransferase 1	GO:0046038 GMP catabolic process;GO:0032263 GMP salvage;GO:1901069 guanosine-containing compound catabolic process		Enzymes/ENZYME proteins/Transferases	Cytosol(Supported)	Azathioprine (Protein homodimerization activity);Mercaptopurine (Protein homodimerization activity);Alpha-Phosphoribosylpyrophosphoric Acid (Protein homodimerization activity);5--Monophosphate-9-Beta-D-Ribofuranosyl Xanthine (Protein homodimerization activity);3h-Pyrazolo[4,3-D]Pyrimidin-7-Ol (Protein homodimerization activity);9-Deazaguanine (Protein homodimerization activity)	(M5493)WNT SIGNALING	(M5898)HALLMARK DNA REPAIR; (M5934)HALLMARK XENOBIOTIC METABOLISM; (M5924)HALLMARK MTORC1 SIGNALING	0	0	0	0	0	0	0	0	0	0	0	0	0	0	0	0	0	0	0	1	1
262	AMD1	0	1	262	Gene_ID	H. sapiens	262	H. sapiens	AMD1	adenosylmethionine decarboxylase 1	GO:0006557 S-adenosylmethioninamine biosynthetic process;GO:0006597 spermine biosynthetic process;GO:0046499 S-adenosylmethioninamine metabolic process		Enzymes/ENZYME proteins/Lyases	Nucleoplasm(Approved)	S-Adenosylmethionine (Putrescine binding);Putrescine (Putrescine binding);Tris (Putrescine binding);5'-{[4-(aminooxy)butyl](methyl)amino}-5'-deoxy-8-ethenyladenosine (Putrescine binding)		(M5941)HALLMARK UV RESPONSE UP; (M5901)HALLMARK G2M CHECKPOINT	0	0	0	0	0	0	0	0	0	0	0	0	0	0	0	0	0	0	0	0	1
10024	TROAP	1	0	10024	Gene_ID	H. sapiens	10024	H. sapiens	TROAP	trophinin associated protein	GO:0007155 cell adhesion;GO:0022610 biological adhesion;GO:0008150 biological_process						(M5901)HALLMARK G2M CHECKPOINT	0	0	0	0	0	0	0	0	0	0	0	0	0	0	0	0	0	0	0	0	1
159090	FAM122B	1	0	159090	Gene_ID	H. sapiens	159090	H. sapiens	FAM122B	family with sequence similarity 122B				Nucleoplasm(Approved)				0	0	0	0	0	0	0	0	0	0	0	0	0	0	0	0	0	0	0	0	1
23649	POLA2	1	0	23649	Gene_ID	H. sapiens	23649	H. sapiens	POLA2	DNA polymerase alpha 2, accessory subunit	GO:0032201 telomere maintenance via semi-conservative replication;GO:0033260 nuclear DNA replication;GO:0006270 DNA replication initiation			Nucleoplasm(Supported)	Dacarbazine (Protein heterodimerization activity)		(M5898)HALLMARK DNA REPAIR; (M5925)HALLMARK E2F TARGETS; (M5901)HALLMARK G2M CHECKPOINT	1	0	1	1	0	0	0	0	0	0	0	0	0	1	0	0	0	0	0	0	1
1738	DLD	0	1	1738	Gene_ID	H. sapiens	1738	H. sapiens	DLD	dihydrolipoamide dehydrogenase	GO:0061732 mitochondrial acetyl-CoA biosynthetic process from pyruvate;GO:0006086 acetyl-CoA biosynthetic process from pyruvate;GO:0006554 lysine catabolic process		Citric acid cycle related proteins;Enzymes/ENZYME proteins/Oxidoreductases	Mitochondria(Supported)	NADH (Nad binding);Flavin adenine dinucleotide (Nad binding)	(M3721)ST JNK MAPK PATHWAY	(M5935)HALLMARK FATTY ACID METABOLISM; (M5905)HALLMARK ADIPOGENESIS; (M5936)HALLMARK OXIDATIVE PHOSPHORYLATION	0	0	0	0	0	0	0	0	0	0	0	0	0	0	0	0	0	0	0	0	1
23500	DAAM2	1	0	23500	Gene_ID	H. sapiens	23500	H. sapiens	DAAM2	dishevelled associated activator of morphogenesis 2	GO:0048715 negative regulation of oligodendrocyte differentiation;GO:0045686 negative regulation of glial cell differentiation;GO:0048713 regulation of oligodendrocyte differentiation			Nucleoplasm(Supported)Cytosol;Vesicles(Approved)				0	0	0	0	0	1	0	0	0	0	0	0	0	0	0	0	0	0	0	0	1
23421	ITGB3BP	0	1	23421	Gene_ID	H. sapiens	23421	H. sapiens	ITGB3BP	integrin subunit beta 3 binding protein	GO:0034080 CENP-A containing nucleosome assembly;GO:0006336 DNA replication-independent nucleosome assembly;GO:0031055 chromatin remodeling at centromere			Nucleoplasm(Supported)		(M3270)ST INTEGRIN SIGNALING PATHWAY		1	1	0	0	1	0	0	0	0	0	0	0	0	1	0	0	0	0	0	0	1
254228	FAM26E	0	1	254228	Gene_ID	H. sapiens	254228	H. sapiens	CALHM5	calcium homeostasis modulator family member 5	GO:0098655 cation transmembrane transport;GO:0034220 ion transmembrane transport;GO:0006812 cation transport			Golgi apparatus(Approved)				0	0	0	0	0	0	0	0	0	0	0	0	0	0	0	0	0	0	0	0	1
7430	EZR	0	1	7430	Gene_ID	H. sapiens	7430	H. sapiens	EZR	ezrin	GO:1900041 negative regulation of interleukin-2 secretion;GO:0050860 negative regulation of T cell receptor signaling pathway;GO:0001951 intestinal D-glucose absorption			Plasma membrane(Enhanced)		(M240)PID SYNDECAN 2 PATHWAY; (M94)PID FAS PATHWAY; (M12)PID RHOA PATHWAY	(M5893)HALLMARK MITOTIC SPINDLE	0	0	0	0	0	1	0	0	0	1	0	1	0	0	0	0	0	0	0	1	1
100288637	LOC100288637	1	0	100288637	Gene_ID	H. sapiens	100288637	H. sapiens	LOC100288637	OTU deubiquitinase 7A pseudogene				Vesicles(Approved)				0	0	0	0	0	0	0	0	0	0	0	0	0	0	0	0	0	0	0	0	1
9700	ESPL1	0	1	9700	Gene_ID	H. sapiens	9700	H. sapiens	ESPL1	extra spindle pole bodies like 1, separase	GO:0045842 positive regulation of mitotic metaphase/anaphase transition;GO:0045875 negative regulation of sister chromatid cohesion;GO:1901970 positive regulation of mitotic sister chromatid separation		Enzymes/ENZYME proteins/Hydrolases	Nucleoplasm;Vesicles(Supported)			(M5893)HALLMARK MITOTIC SPINDLE; (M5925)HALLMARK E2F TARGETS; (M5901)HALLMARK G2M CHECKPOINT	1	1	1	0	0	1	0	1	0	0	1	0	0	0	1	1	1	0	0	0	1
8200	GDF5	1	0	8200	Gene_ID	H. sapiens	8200	H. sapiens	GDF5	growth differentiation factor 5	GO:2001054 negative regulation of mesenchymal cell apoptotic process;GO:0043932 ossification involved in bone remodeling;GO:0032332 positive regulation of chondrocyte differentiation				Isopropyl Alcohol (Transforming growth factor beta receptor binding)	(M5883)NABA SECRETED FACTORS; (M5885)NABA MATRISOME ASSOCIATED; (M5889)NABA MATRISOME		0	0	0	0	0	0	0	0	0	0	0	0	1	0	0	0	0	0	0	1	1
80146	UXS1	0	1	80146	Gene_ID	H. sapiens	80146	H. sapiens	UXS1	UDP-glucuronate decarboxylase 1	GO:0033320 UDP-D-xylose biosynthetic process;GO:0033319 UDP-D-xylose metabolic process;GO:0009226 nucleotide-sugar biosynthetic process		Enzymes/ENZYME proteins/Lyases					0	0	0	0	0	0	0	0	0	0	0	0	0	0	0	0	0	0	0	0	1
26040	SETBP1	1	0	26040	Gene_ID	H. sapiens	26040	H. sapiens	SETBP1	SET binding protein 1	GO:0006357 regulation of transcription by RNA polymerase II;GO:0006366 transcription by RNA polymerase II;GO:0006355 regulation of transcription, DNA-templated			Nuclear bodies;Nucleus(Supported)Cytosol(Uncertain)				0	0	0	0	0	0	0	0	0	0	0	0	0	0	0	0	0	0	0	0	1
4678	NASP	0	1	4678	Gene_ID	H. sapiens	4678	H. sapiens	NASP	nuclear autoantigenic sperm protein	GO:0034080 CENP-A containing nucleosome assembly;GO:0006335 DNA replication-dependent nucleosome assembly;GO:0006336 DNA replication-independent nucleosome assembly			Nucleoplasm(Enhanced)			(M5937)HALLMARK GLYCOLYSIS; (M5925)HALLMARK E2F TARGETS; (M5901)HALLMARK G2M CHECKPOINT	0	0	1	1	1	0	0	0	0	0	0	0	0	1	0	0	0	0	0	0	1
338773	TMEM119	1	0	338773	Gene_ID	H. sapiens	338773	H. sapiens	TMEM119	transmembrane protein 119	GO:0045779 negative regulation of bone resorption;GO:0010832 negative regulation of myotube differentiation;GO:1903012 positive regulation of bone development							0	0	0	0	0	0	0	0	0	0	0	0	0	0	0	0	0	0	0	0	1
6525	SMTN	0	1	6525	Gene_ID	H. sapiens	6525	H. sapiens	SMTN	smoothelin	GO:0006939 smooth muscle contraction;GO:0006936 muscle contraction;GO:0007517 muscle organ development			Nucleoplasm(Enhanced)Actin filaments(Supported)			(M5909)HALLMARK MYOGENESIS	0	0	0	0	0	1	0	0	0	0	0	0	0	0	0	0	0	0	0	0	1
2232	FDXR	1	0	2232	Gene_ID	H. sapiens	2232	H. sapiens	FDXR	ferredoxin reductase	GO:0006700 C21-steroid hormone biosynthetic process;GO:0006744 ubiquinone biosynthetic process;GO:0008207 C21-steroid hormone metabolic process		Enzymes/ENZYME proteins/Oxidoreductases	Mitochondria(Enhanced)	Flavin adenine dinucleotide (Nadph-adrenodoxin reductase activity);2'-Monophosphoadenosine 5'-Diphosphoribose (Nadph-adrenodoxin reductase activity)	(M256)PID TAP63 PATHWAY; (M145)PID P53 DOWNSTREAM PATHWAY	(M5948)HALLMARK BILE ACID METABOLISM; (M5902)HALLMARK APOPTOSIS; (M5939)HALLMARK P53 PATHWAY	0	0	0	0	0	0	0	0	0	0	0	0	0	0	0	0	0	0	0	0	1
4811	NID1	1	0	4811	Gene_ID	H. sapiens	4811	H. sapiens	NID1	nidogen 1	GO:0032836 glomerular basement membrane development;GO:0032835 glomerulus development;GO:0071711 basement membrane organization				Urokinase (Proteoglycan binding)	(M5887)NABA BASEMENT MEMBRANES; (M18)PID INTEGRIN1 PATHWAY; (M3008)NABA ECM GLYCOPROTEINS		0	0	0	0	0	0	0	0	0	0	0	0	0	0	0	0	0	0	1	0	1
112597	CYTOR	0	1	112597	Gene_ID	H. sapiens	112597	H. sapiens	CYTOR	cytoskeleton regulator RNA								0	0	0	0	0	0	0	0	0	0	0	0	0	0	0	0	0	0	0	0	1
990	CDC6	0	1	990	Gene_ID	H. sapiens	990	H. sapiens	CDC6	cell division cycle 6	GO:1904117 cellular response to vasopressin;GO:0007089 traversing start control point of mitotic cell cycle;GO:0033314 mitotic DNA replication checkpoint			Cytokinetic bridge;Cytosol;Mitotic spindle;Nucleus(Supported)		(M46)PID ATR PATHWAY; (M40)PID E2F PATHWAY	(M5947)HALLMARK IL2 STAT5 SIGNALING; (M5907)HALLMARK ESTROGEN RESPONSE LATE; (M5901)HALLMARK G2M CHECKPOINT	1	1	1	1	0	0	0	1	0	1	1	1	0	0	0	0	1	0	0	0	1
146691	TOM1L2	0	1	146691	Gene_ID	H. sapiens	146691	H. sapiens	TOM1L2	target of myb1 like 2 membrane trafficking protein	GO:0045839 negative regulation of mitotic nuclear division;GO:0051784 negative regulation of nuclear division;GO:0007088 regulation of mitotic nuclear division			Golgi apparatus;Intermediate filaments(Supported)				0	1	1	0	0	0	0	1	0	0	0	0	0	0	1	0	0	0	0	0	1
84263	HSDL2	0	1	84263	Gene_ID	H. sapiens	84263	H. sapiens	HSDL2	hydroxysteroid dehydrogenase like 2	GO:0055114 oxidation-reduction process;GO:0008152 metabolic process;GO:0008150 biological_process			Mitochondria(Supported)			(M5935)HALLMARK FATTY ACID METABOLISM	0	0	0	0	0	0	0	0	0	0	0	0	0	0	0	0	0	0	0	0	1
25976	TIPARP	0	1	25976	Gene_ID	H. sapiens	25976	H. sapiens	TIPARP	TCDD inducible poly(ADP-ribose) polymerase	GO:1904612 response to 2,3,7,8-tetrachlorodibenzodioxine;GO:0070213 protein auto-ADP-ribosylation;GO:0008209 androgen metabolic process		Enzymes/ENZYME proteins/Transferases	Microtubules(Approved)			(M5906)HALLMARK ESTROGEN RESPONSE EARLY; (M5891)HALLMARK HYPOXIA; (M5890)HALLMARK TNFA SIGNALING VIA NFKB	0	0	0	0	0	0	0	0	0	0	0	0	1	0	0	0	0	0	0	0	1
4940	OAS3	1	0	4940	Gene_ID	H. sapiens	4940	H. sapiens	OAS3	2'-5'-oligoadenylate synthetase 3	GO:0045071 negative regulation of viral genome replication;GO:0060700 regulation of ribonuclease activity;GO:1903901 negative regulation of viral life cycle		Enzymes/ENZYME proteins/Transferases	Cytosol;Nucleoplasm(Supported)Plasma membrane(Approved)			(M5913)HALLMARK INTERFERON GAMMA RESPONSE	0	0	0	0	0	0	0	0	0	0	0	0	0	0	0	0	0	0	0	0	1
9666	DZIP3	0	1	9666	Gene_ID	H. sapiens	9666	H. sapiens	DZIP3	DAZ interacting zinc finger protein 3	GO:0000209 protein polyubiquitination;GO:0016567 protein ubiquitination;GO:0032446 protein modification by small protein conjugation		Enzymes/ENZYME proteins/Transferases	Vesicles(Approved)				0	0	0	0	0	0	0	0	0	0	0	0	0	0	0	0	0	0	0	0	1
55159	RFWD3	0	1	55159	Gene_ID	H. sapiens	55159	H. sapiens	RFWD3	ring finger and WD repeat domain 3	GO:0031052 chromosome breakage;GO:0031571 mitotic G1 DNA damage checkpoint;GO:0031049 programmed DNA elimination		Enzymes/ENZYME proteins/Transferases	Nucleoplasm(Enhanced)Cytosol(Supported)				0	0	1	1	1	0	0	0	0	1	0	0	0	0	0	0	0	0	0	0	1
25890	ABI3BP	0	1	25890	Gene_ID	H. sapiens	25890	H. sapiens	ABI3BP	ABI family member 3 binding protein	GO:0010811 positive regulation of cell-substrate adhesion;GO:0010810 regulation of cell-substrate adhesion;GO:0045785 positive regulation of cell adhesion					(M3008)NABA ECM GLYCOPROTEINS; (M5884)NABA CORE MATRISOME; (M5889)NABA MATRISOME	(M5930)HALLMARK EPITHELIAL MESENCHYMAL TRANSITION	0	0	0	0	0	0	0	0	0	0	0	0	0	0	0	0	0	0	1	0	1
3329	HSPD1	0	1	3329	Gene_ID	H. sapiens	3329	H. sapiens	HSPD1	heat shock protein family D (Hsp60) member 1	GO:0048291 isotype switching to IgG isotypes;GO:0002842 positive regulation of T cell mediated immune response to tumor cell;GO:0002368 B cell cytokine production		Enzymes/ENZYME proteins/Hydrolases	Mitochondria(Enhanced)		(M264)PID TOLL ENDOGENOUS PATHWAY; (M66)PID MYC ACTIV PATHWAY	(M5928)HALLMARK MYC TARGETS V2; (M5924)HALLMARK MTORC1 SIGNALING; (M5926)HALLMARK MYC TARGETS V1	0	0	0	0	1	0	0	0	0	0	0	0	0	0	0	0	0	0	1	0	1
56829	ZC3HAV1	0	1	56829	Gene_ID	H. sapiens	56829	H. sapiens	ZC3HAV1	zinc finger CCCH-type containing, antiviral 1	GO:0045071 negative regulation of viral genome replication;GO:0070212 protein poly-ADP-ribosylation;GO:0061014 positive regulation of mRNA catabolic process			Cytosol(Enhanced)Golgi apparatus(Approved)				0	0	0	0	0	0	0	0	0	0	0	0	0	0	0	0	0	0	0	0	1
1368	CPM	0	1	1368	Gene_ID	H. sapiens	1368	H. sapiens	CPM	carboxypeptidase M	GO:0016485 protein processing;GO:0051604 protein maturation;GO:0006518 peptide metabolic process		Enzymes/{ENZYME proteins/Hydrolases,Peptidases/Metallopeptidases}	Vesicles(Uncertain)			(M5921)HALLMARK COMPLEMENT	0	0	0	0	0	0	0	0	0	0	0	0	0	0	0	0	0	0	0	0	1
7114	TMSB4X	0	1	7114	Gene_ID	H. sapiens	7114	H. sapiens	TMSB4X	thymosin beta 4 X-linked	GO:1905273 positive regulation of proton-transporting ATP synthase activity, rotational mechanism;GO:1905271 regulation of proton-transporting ATP synthase activity, rotational mechanism;GO:2000483 negative regulation of interleukin-8 secretion			Cytosol;Nucleoplasm;Vesicles(Approved)				0	0	0	0	0	1	0	0	0	0	0	0	1	0	1	0	0	1	0	1	1
22989	MYH15	1	0	22989	Gene_ID	H. sapiens	22989	H. sapiens	MYH15	myosin heavy chain 15	GO:0002074 extraocular skeletal muscle development;GO:0007519 skeletal muscle tissue development;GO:0060538 skeletal muscle organ development			Centrosome;Mitochondria;Nucleoplasm(Approved)				0	0	0	0	0	0	0	0	0	0	0	0	0	0	0	0	0	0	0	0	1
79075	DSCC1	0	1	79075	Gene_ID	H. sapiens	79075	H. sapiens	DSCC1	DNA replication and sister chromatid cohesion 1	GO:1900264 positive regulation of DNA-directed DNA polymerase activity;GO:0034088 maintenance of mitotic sister chromatid cohesion;GO:0034421 post-translational protein acetylation			Nucleoplasm(Approved)			(M5925)HALLMARK E2F TARGETS	1	1	0	1	1	0	0	0	0	1	0	0	0	1	0	0	0	0	0	0	1
79690	GAL3ST4	1	0	79690	Gene_ID	H. sapiens	79690	H. sapiens	GAL3ST4	galactose-3-O-sulfotransferase 4	GO:0030166 proteoglycan biosynthetic process;GO:0009247 glycolipid biosynthetic process;GO:0006029 proteoglycan metabolic process			Cytosol;Nucleoplasm(Approved)				0	0	0	0	0	0	0	0	0	0	0	0	0	0	0	0	0	0	0	0	1
55959	SULF2	1	0	55959	Gene_ID	H. sapiens	55959	H. sapiens	SULF2	sulfatase 2	GO:0014846 esophagus smooth muscle contraction;GO:2000345 regulation of hepatocyte proliferation;GO:0032836 glomerular basement membrane development					(M3468)NABA ECM REGULATORS; (M5885)NABA MATRISOME ASSOCIATED; (M5889)NABA MATRISOME	(M5916)HALLMARK APICAL SURFACE	0	0	0	0	0	0	0	0	0	0	0	0	1	0	0	0	0	0	0	0	1
26585	GREM1	0	1	26585	Gene_ID	H. sapiens	26585	H. sapiens	GREM1	gremlin 1, DAN family BMP antagonist	GO:0090190 positive regulation of branching involved in ureteric bud morphogenesis;GO:0060676 ureteric bud formation;GO:0090189 regulation of branching involved in ureteric bud morphogenesis					(M181)PID BMP PATHWAY; (M5880)NABA ECM AFFILIATED; (M5885)NABA MATRISOME ASSOCIATED	(M5930)HALLMARK EPITHELIAL MESENCHYMAL TRANSITION	0	0	0	0	0	1	0	0	0	1	0	0	1	0	0	0	0	0	1	1	1
8671	SLC4A4	0	1	8671	Gene_ID	H. sapiens	8671	H. sapiens	SLC4A4	solute carrier family 4 member 4	GO:0045821 positive regulation of glycolytic process;GO:2001171 positive regulation of ATP biosynthetic process;GO:0006110 regulation of glycolytic process		Transporters/Electrochemical Potential-driven transporters				(M5932)HALLMARK INFLAMMATORY RESPONSE	0	0	0	0	0	0	0	0	0	0	0	0	0	0	0	0	0	0	0	0	1
5426	POLE	1	0	5426	Gene_ID	H. sapiens	5426	H. sapiens	POLE	DNA polymerase epsilon, catalytic subunit	GO:0032201 telomere maintenance via semi-conservative replication;GO:0045004 DNA replication proofreading;GO:0006287 base-excision repair, gap-filling		Enzymes/ENZYME proteins/Transferases	Nucleus;Plasma membrane(Enhanced)	Cladribine (Zinc ion binding)		(M5925)HALLMARK E2F TARGETS; (M5901)HALLMARK G2M CHECKPOINT	1	0	1	1	1	0	0	0	0	0	0	0	0	0	0	0	0	0	0	0	1
4173	MCM4	1	0	4173	Gene_ID	H. sapiens	4173	H. sapiens	MCM4	minichromosome maintenance complex component 4	GO:1902975 mitotic DNA replication initiation;GO:0006267 pre-replicative complex assembly involved in nuclear cell cycle DNA replication;GO:1902315 nuclear cell cycle DNA replication initiation		Enzymes/ENZYME proteins/Hydrolases	Nucleoplasm(Enhanced)		(M195)PID CMYB PATHWAY	(M5928)HALLMARK MYC TARGETS V2; (M5925)HALLMARK E2F TARGETS; (M5924)HALLMARK MTORC1 SIGNALING	1	0	1	1	1	0	0	0	0	0	0	0	0	1	0	0	0	0	0	0	1
11234	HPS5	0	1	11234	Gene_ID	H. sapiens	11234	H. sapiens	HPS5	HPS5 biogenesis of lysosomal organelles complex 2 subunit 2	GO:0007596 blood coagulation;GO:0007599 hemostasis;GO:0043473 pigmentation							0	0	0	0	0	0	0	0	0	0	0	0	0	0	0	0	0	0	0	0	1
10346	TRIM22	1	0	10346	Gene_ID	H. sapiens	10346	H. sapiens	TRIM22	tripartite motif containing 22	GO:0060333 interferon-gamma-mediated signaling pathway;GO:0051092 positive regulation of NF-kappaB transcription factor activity;GO:0071346 cellular response to interferon-gamma		Enzymes/ENZYME proteins/Transferases	Nuclear bodies;Nucleoplasm(Supported)				0	0	0	0	0	0	0	0	0	0	0	0	0	0	0	0	0	0	0	0	1
3184	HNRNPD	0	1	3184	Gene_ID	H. sapiens	3184	H. sapiens	HNRNPD	heterogeneous nuclear ribonucleoprotein D	GO:1905663 positive regulation of telomerase RNA reverse transcriptase activity;GO:1990828 hepatocyte dedifferentiation;GO:1904586 cellular response to putrescine			Nucleoplasm(Enhanced)			(M5925)HALLMARK E2F TARGETS; (M5901)HALLMARK G2M CHECKPOINT; (M5926)HALLMARK MYC TARGETS V1	0	0	0	0	0	1	0	1	0	1	0	0	0	0	0	0	0	0	0	0	1
55256	ADI1	0	1	55256	Gene_ID	H. sapiens	55256	H. sapiens	ADI1	acireductone dioxygenase 1	GO:0019509 L-methionine salvage from methylthioadenosine;GO:0071267 L-methionine salvage;GO:0071265 L-methionine biosynthetic process		Enzymes/ENZYME proteins/Oxidoreductases	Nucleoplasm(Enhanced)Golgi apparatus(Approved)	Isopropyl Alcohol (Oxidoreductase activity)			0	0	0	0	0	0	0	0	0	0	0	0	0	0	0	0	0	0	0	0	1
64840	PORCN	0	1	64840	Gene_ID	H. sapiens	64840	H. sapiens	PORCN	porcupine O-acyltransferase	GO:0045234 protein palmitoleylation;GO:0006497 protein lipidation;GO:0099072 regulation of postsynaptic membrane neurotransmitter receptor levels			Vesicles(Approved)		(M5493)WNT SIGNALING		0	0	0	0	0	0	0	0	0	0	0	0	0	0	0	0	0	0	0	0	1
8840	WISP1	0	1	8840	Gene_ID	H. sapiens	8840	H. sapiens	CCN4	cellular communication network factor 4	GO:0032331 negative regulation of chondrocyte differentiation;GO:0014911 positive regulation of smooth muscle cell migration;GO:0061037 negative regulation of cartilage development			Cytosol(Approved)		(M5493)WNT SIGNALING; (M3008)NABA ECM GLYCOPROTEINS; (M5884)NABA CORE MATRISOME		0	0	0	0	0	0	0	0	0	0	0	0	1	0	0	0	0	0	0	0	1
5784	PTPN14	0	1	5784	Gene_ID	H. sapiens	5784	H. sapiens	PTPN14	protein tyrosine phosphatase non-receptor type 14	GO:0001946 lymphangiogenesis;GO:0046825 regulation of protein export from nucleus;GO:0036303 lymph vessel morphogenesis		Enzymes/ENZYME proteins/Hydrolases	Nucleoplasm(Enhanced)			(M5939)HALLMARK P53 PATHWAY	0	0	0	0	0	0	0	0	0	0	0	0	0	0	0	0	0	0	0	0	1
80323	CCDC68	0	1	80323	Gene_ID	H. sapiens	80323	H. sapiens	CCDC68	coiled-coil domain containing 68	GO:0034454 microtubule anchoring at centrosome;GO:0072393 microtubule anchoring at microtubule organizing center;GO:0034453 microtubule anchoring			Cytosol;Golgi apparatus(Approved)				0	0	0	0	0	0	0	0	0	0	0	0	0	0	0	0	0	0	0	0	1
9672	SDC3	1	0	9672	Gene_ID	H. sapiens	9672	H. sapiens	SDC3	syndecan 3	GO:0001523 retinoid metabolic process;GO:0006027 glycosaminoglycan catabolic process;GO:0016101 diterpenoid metabolic process			Mitochondria;Nucleoplasm(Approved)		(M251)PID SYNDECAN 3 PATHWAY; (M5880)NABA ECM AFFILIATED; (M5885)NABA MATRISOME ASSOCIATED	(M5937)HALLMARK GLYCOLYSIS; (M5891)HALLMARK HYPOXIA; (M5915)HALLMARK APICAL JUNCTION	0	0	0	0	0	0	0	0	0	0	0	0	0	0	0	0	0	1	0	0	1
5514	PPP1R10	1	0	5514	Gene_ID	H. sapiens	5514	H. sapiens	PPP1R10	protein phosphatase 1 regulatory subunit 10	GO:1904290 negative regulation of mitotic DNA damage checkpoint;GO:1904289 regulation of mitotic DNA damage checkpoint;GO:2000002 negative regulation of DNA damage checkpoint			Nuclear bodies;Nucleoplasm(Enhanced)				0	0	1	0	0	1	0	1	0	0	1	0	0	0	0	0	0	0	0	0	1
55723	ASF1B	1	0	55723	Gene_ID	H. sapiens	55723	H. sapiens	ASF1B	anti-silencing function 1B histone chaperone	GO:0006335 DNA replication-dependent nucleosome assembly;GO:0001835 blastocyst hatching;GO:0006336 DNA replication-independent nucleosome assembly			Nucleoplasm(Supported)			(M5925)HALLMARK E2F TARGETS	0	0	0	0	1	0	0	0	0	0	0	0	0	1	0	0	0	0	0	0	1
6241	RRM2	1	0	6241	Gene_ID	H. sapiens	6241	H. sapiens	RRM2	ribonucleotide reductase regulatory subunit M2	GO:0070317 negative regulation of G0 to G1 transition;GO:0051290 protein heterotetramerization;GO:0009263 deoxyribonucleotide biosynthetic process		Enzymes/ENZYME proteins/Oxidoreductases	Cytosol(Supported)	Cladribine (Ribonucleoside-diphosphate reductase activity, thioredoxin disulfide as acceptor);Imexon (Ribonucleoside-diphosphate reductase activity, thioredoxin disulfide as acceptor);Gallium nitrate (Ribonucleoside-diphosphate reductase activity, thioredoxin disulfide as acceptor);motexafin gadolinium (Ribonucleoside-diphosphate reductase activity, thioredoxin disulfide as acceptor);GTI 2040 (Ri…	(M40)PID E2F PATHWAY	(M5925)HALLMARK E2F TARGETS; (M5924)HALLMARK MTORC1 SIGNALING	1	0	1	1	0	0	0	0	0	0	0	0	0	0	0	0	0	0	0	0	1
102724488	LOC102724488	0	1	102724488	Gene_ID	H. sapiens	102724488	H. sapiens	LOC102724488	synaptotagmin-15				Golgi apparatus(Approved)				0	0	0	0	0	0	0	0	0	0	0	0	0	0	0	0	0	0	0	0	1
[truncated: 329 more rows]

## Sheet: Enrichment
GroupID	Category	Term	Description	LogP	Log(q-value)	InTerm_InList	Genes	Symbols
[truncated: 363 more rows]
